# Supplementary material for: A tumor suppressor role for EZH2 in diffuse midline glioma pathogenesis
Source: Acta Neuropathol Commun. 2022 Apr 8;10:47. doi: 10.1186/s40478-022-01336-5 (PMC8994223; doi:10.1186/s40478-022-01336-5)
Supplement: Supplementary file 3 — Additional file 3. List of significantly differentially expressed genes comparing EZH2 LOF vs. EZH2 WT in the context of PDGFB, and p53 loss. [file 40478_2022_1336_MOESM3_ESM.xlsx]

## Sheet: N_CRE_vs_NEL_CRE_Differential_E
Ensembl ID	Gene Symbol	Entrez ID	Description	Location	Strand	Log2 Fold Change	LFC Standard Error	Wald Statistic	p Value	FDR Adj p Value	Significant	Status	Base Mean	N_CRE	NEL_CRE	N_CRE_1_S24	N_CRE_2_S25	N_CRE_3_S26	NEL_CRE_13_S38	NEL_CRE_14_S39	NEL_CRE_15_S40	NEL_CRE_16_S41
ENSMUSG00000022483	Col2a1	12824	collagen, type II, alpha 1	chr15:97975601-98004724	-	3.74283	0.162446	23.0405	1.83056e-117	2.4513e-113	Yes	OK	428.122	47.9336	713.264	44.5434	48.5446	50.7127	545.372	693.767	779.057	834.86
ENSMUSG00000027520	Zdbf2	73884	zinc finger, DBF-type containing 2	chr1:63200357-63314575	+	4.46609	0.207805	21.4918	1.85948e-102	1.24501e-98	Yes	OK	352.615	20.5471	601.666	13.363	32.2367	16.0418	632.448	558.868	604.707	610.641
ENSMUSG00000024121	Atp6v0c	11984	ATPase, H+ transporting, lysosomal V0 subunit C	chr17:24163865-24169429	-	3.41391	0.234853	14.5364	7.12828e-48	3.18183e-44	Yes	OK	89.4591	10.7382	148.5	11.6926	7.5851	12.9369	155.82	175.583	130.211	132.385
ENSMUSG00000063804	Lin28b	380669	lin-28 homolog B (C. elegans)	chr10:45376618-45470201	-	3.8767	0.268355	14.4462	2.64899e-47	8.86814e-44	Yes	OK	96.6978	6.88723	164.056	8.35189	10.2399	2.0699	201.65	171.301	144.924	138.348
ENSMUSG00000035357	Pdzrn3	55983	PDZ domain containing RING finger 3	chr6:101149606-101377897	-	2.42287	0.174976	13.8469	1.32807e-43	3.55685e-40	Yes	OK	140.08	37.5733	216.96	32.294	40.5803	39.8457	187.901	214.126	252.329	213.486
ENSMUSG00000040118	Cacna2d1	12293	calcium channel, voltage-dependent, alpha2/delta subunit 1	chr5:15934690-16374511	+	2.08132	0.156133	13.3304	1.54037e-40	3.43785e-37	Yes	OK	277.919	92.0182	417.344	83.5189	114.914	77.6214	430.798	413.263	393.575	431.742
ENSMUSG00000025255	Zfhx4	80892	zinc finger homeodomain 4	chr3:5218553-5415855	+	2.8412	0.217287	13.0758	4.52757e-39	8.66124e-36	Yes	OK	198.086	36.3919	319.357	26.1692	51.9579	31.0486	403.3	291.211	269.249	313.669
ENSMUSG00000097767	Miat	330166	myocardial infarction associated transcript (non-protein coding)	chr5:112213227-112228948	-	1.97774	0.158155	12.5051	7.0027e-36	1.17216e-32	Yes	OK	453.297	161.473	672.164	159.799	131.601	193.019	609.533	805.113	621.627	652.384
ENSMUSG00000000031	H19	14955	H19, imprinted maternally expressed transcript	chr7:142575529-142578146	-	2.82199	0.23213	12.157	5.26771e-34	7.83776e-31	Yes	OK	167.398	32.0122	268.938	32.8508	25.4101	37.7758	169.569	224.832	345.022	336.329
ENSMUSG00000003282	Plag1	56711	pleiomorphic adenoma gene 1	chr4:3901157-3938405	-	3.3785	0.28283	11.9454	6.86553e-33	9.19363e-30	Yes	OK	54.757	5.4442	91.7417	6.12472	6.06808	4.13981	128.323	64.2377	80.1862	94.2199
ENSMUSG00000029304	Spp1	20750	secreted phosphoprotein 1	chr5:104436191-104441053	+	-2.54888	0.216134	-11.793	4.23941e-32	5.1609e-29	Yes	OK	213.353	422.007	56.8626	368.597	371.67	525.756	27.4977	59.9552	77.9793	62.0182
ENSMUSG00000042607	Asb4	65255	ankyrin repeat and SOCS box-containing 4	chr6:5383385-5433021	+	3.54205	0.303666	11.6643	1.94027e-31	2.16518e-28	Yes	OK	117.622	9.82667	198.468	14.4766	5.68882	9.31457	238.314	87.7915	262.628	205.137
ENSMUSG00000096727	Psmb9	16912	proteasome (prosome, macropain) subunit, beta type 9 (large multifunctional peptidase 2)	chr17:34182098-34187330	-	3.19396	0.27602	11.5715	5.74799e-31	5.92087e-28	Yes	OK	188.139	23.6728	311.489	23.3853	15.5495	32.0835	357.47	145.605	370.769	372.109
ENSMUSG00000033585	Ndn	17984	necdin	chr7:62348276-62349927	+	1.76896	0.15759	11.2251	3.07179e-29	2.93817e-26	Yes	OK	523.068	210.596	757.422	236.637	219.209	175.942	792.851	794.406	849.68	592.751
ENSMUSG00000039153	Runx2	12393	runt related transcription factor 2	chr17:44603988-44814797	-	2.7213	0.248116	10.9678	5.45636e-28	4.87108e-25	Yes	OK	84.9367	16.3283	136.393	20.6013	14.4117	13.9719	142.072	130.617	96.3706	176.513
ENSMUSG00000092035	Peg10	170676	paternally expressed 10	chr6:4747305-4760516	+	1.34886	0.125086	10.7835	4.12132e-27	3.44928e-24	Yes	OK	468.796	246.14	635.789	234.966	257.135	246.319	591.201	556.727	710.641	684.585
ENSMUSG00000097336	Fendrr	68790	Foxf1 adjacent non-coding developmental regulatory RNA	chr8:121058801-121083110	-	3.10383	0.298935	10.383	2.9643e-25	2.335e-22	Yes	OK	61.6829	7.47438	102.339	8.35189	6.82659	7.24466	123.74	49.2489	95.635	140.734
ENSMUSG00000022123	Scel	64929	sciellin	chr14:103513340-103613346	+	-3.23468	0.312338	-10.3563	3.91768e-25	2.91453e-22	Yes	OK	77.242	168.794	8.57811	232.182	163.459	110.74	4.58295	4.28251	14.7131	10.7339
ENSMUSG00000066800	Rnasel	24014	ribonuclease L (2', 5'-oligoisoadenylate synthetase-dependent)	chr1:153749425-153764221	+	2.39637	0.231711	10.3421	4.54463e-25	3.203e-22	Yes	OK	90.9616	22.5998	142.233	22.2717	17.0665	28.4612	178.735	98.4978	139.039	152.66
ENSMUSG00000058600	Rpl30	19946	ribosomal protein L30	chr15:34440507-34443225	-	1.98759	0.197128	10.0828	6.58513e-24	4.40907e-21	Yes	OK	97.7926	33.8429	145.755	30.0668	31.0989	40.3631	123.74	156.312	132.418	170.55
ENSMUSG00000034777	Vax2	24113	ventral anterior homeobox 2	chr6:83711263-83738304	+	3.56488	0.354321	10.0612	8.20256e-24	5.2305e-21	Yes	OK	22.5446	0.876868	38.7954	1.11359	1.51702	0	32.0807	42.8251	39.7253	40.5504
ENSMUSG00000022548	Apod	11815	apolipoprotein D	chr16:31296191-31314808	-	-2.36714	0.240671	-9.83558	7.91079e-23	4.62718e-20	Yes	OK	490.744	942.135	152.202	1473.83	697.45	655.125	151.238	167.018	158.166	132.385
ENSMUSG00000063972	Nr6a1	14536	nuclear receptor subfamily 6, group A, member 1	chr2:38723373-38784515	-	2.40536	0.24458	9.83468	7.98236e-23	4.62718e-20	Yes	OK	63.7044	14.9514	100.269	17.8174	16.6872	10.3495	132.906	85.6503	97.8419	84.6787
ENSMUSG00000024026	Glo1	109801	glyoxalase 1	chr17:30592861-30612659	-	-1.614	0.164178	-9.83083	8.29306e-23	4.62718e-20	Yes	OK	204.111	333.933	106.745	373.608	328.056	300.136	114.574	119.91	87.5428	104.954
ENSMUSG00000041921	Metap1d	66559	methionyl aminopeptidase type 1D (mitochondrial)	chr2:71453337-71525191	+	1.7824	0.181876	9.80012	1.12448e-22	6.02319e-20	Yes	OK	100.882	40.0509	146.505	38.4187	45.5106	36.2233	137.489	132.758	155.959	159.816
ENSMUSG00000037003	Tns2	209039	tensin 2	chr15:102102987-102116401	+	1.98699	0.203027	9.78679	1.28308e-22	6.60834e-20	Yes	OK	254.801	88.0707	379.848	102.45	58.7845	102.978	279.56	400.415	420.794	418.623
ENSMUSG00000063511	Snrnp70	20637	small nuclear ribonucleoprotein 70 (U1)	chr7:45376453-45395742	-	1.02415	0.105355	9.72095	2.45472e-22	1.21745e-19	Yes	OK	1163.36	723.308	1493.4	703.229	696.691	770.004	1535.29	1509.59	1348.45	1580.27
ENSMUSG00000037321	Tap1	21354	transporter 1, ATP-binding cassette, sub-family B (MDR/TAP)	chr17:34187555-34197225	+	2.41237	0.24949	9.6692	4.07545e-22	1.94908e-19	Yes	OK	535.012	127.865	840.372	118.597	86.4701	178.529	1131.99	479.642	848.209	901.649
ENSMUSG00000023484	Prph	19132	peripherin	chr15:99055173-99058978	+	3.10759	0.323984	9.59179	8.65697e-22	3.99743e-19	Yes	OK	41.8454	4.4887	69.8629	1.67038	4.55106	7.24466	45.8295	53.5314	78.7149	101.376
ENSMUSG00000034573	Ptpn13	19249	protein tyrosine phosphatase, non-receptor type 13	chr5:103425191-103598361	+	1.64206	0.172065	9.54325	1.38424e-21	6.17879e-19	Yes	OK	399.62	171.313	570.85	141.425	174.837	197.676	692.026	419.686	569.396	602.292
ENSMUSG00000062296	Trank1	320429	tetratricopeptide repeat and ankyrin repeat containing 1	chr9:111311738-111395775	+	1.99456	0.209395	9.52538	1.64447e-21	7.10358e-19	Yes	OK	278.841	93.6216	417.756	96.8819	109.984	73.9991	380.385	464.653	286.905	539.081
ENSMUSG00000085396	Firre	103012	functional intergenic repeating RNA element	chrX:50563119-50635321	-	1.26764	0.134081	9.45428	3.25254e-21	1.36109e-18	Yes	OK	228.056	122.471	307.244	120.267	114.156	132.991	352.888	289.07	297.204	289.816
ENSMUSG00000055413	H2-Q5	15016	histocompatibility 2, Q region locus 5	chr17:35394098-35395630	+	3.17252	0.335818	9.44715	3.48182e-21	1.41288e-18	Yes	OK	69.2595	6.20556	116.55	2.78396	3.41329	12.4194	155.82	59.9552	103.727	146.697
ENSMUSG00000101609	Kcnq1ot1	63830	KCNQ1 overlapping transcript 1	chr7:143213110-143296547	-	1.26002	0.133629	9.42922	4.13162e-21	1.62725e-18	Yes	OK	1272.22	696.317	1704.14	782.85	587.845	718.257	1576.54	1569.54	1870.77	1799.72
ENSMUSG00000099032	Tcf24	100039596	transcription factor 24	chr1:9960162-9967485	-	3.21662	0.344065	9.34888	8.85826e-21	3.38917e-18	Yes	OK	29.1309	2.20902	49.3223	4.45434	1.13776	1.03495	59.5784	57.8139	34.5757	45.321
ENSMUSG00000023921	Mut	17850	methylmalonyl-Coenzyme A mutase	chr17:40934684-40961989	+	-1.45508	0.156254	-9.31225	1.25157e-20	4.65548e-18	Yes	OK	168.86	270.147	92.8954	297.884	266.237	246.319	82.4932	98.4978	96.3706	94.2199
ENSMUSG00000038765	Lmx1b	16917	LIM homeobox transcription factor 1 beta	chr2:33564535-33640511	-	2.89435	0.313304	9.23813	2.5084e-20	9.07838e-18	Yes	OK	61.1571	8.59806	100.576	15.0334	4.55106	6.20971	59.5784	102.78	95.635	144.312
ENSMUSG00000052415	Tchh	99681	trichohyalin	chr3:93442329-93449077	+	2.88446	0.31836	9.06038	1.30001e-19	4.58115e-17	Yes	OK	27.1538	3.37975	44.9843	3.89755	4.1718	2.0699	50.4125	49.2489	39.7253	40.5504
ENSMUSG00000066363	Serpina3f	238393	serine (or cysteine) peptidase inhibitor, clade A, member 3F	chr12:104214632-104221129	+	3.35252	0.373755	8.96983	2.96983e-19	1.01972e-16	Yes	OK	38.2762	1.43236	65.9092	2.22717	0	2.0699	96.242	19.2713	61.0593	87.064
ENSMUSG00000028270	Gbp2	14469	guanylate binding protein 2	chr3:142620662-142638008	+	2.40591	0.269477	8.92806	4.33528e-19	1.45134e-16	Yes	OK	161.155	36.553	254.607	28.9532	34.1329	46.5728	384.968	128.475	210.397	294.586
ENSMUSG00000070691	Runx3	12399	runt related transcription factor 3	chr4:135120644-135177990	+	2.40626	0.270673	8.88992	6.11547e-19	1.99737e-16	Yes	OK	67.356	15.1305	106.525	15.5902	9.10212	20.699	142.072	100.639	77.2436	106.147
ENSMUSG00000038872	Zfhx3	11906	zinc finger homeobox 3	chr8:108714643-108961636	+	1.59121	0.181223	8.78038	1.62922e-18	5.19448e-16	Yes	OK	268.786	119.26	380.931	145.323	87.2286	125.229	389.551	329.754	361.942	442.476
ENSMUSG00000026730	Pter	19212	phosphotriesterase related	chr2:12924040-13003454	+	-1.61521	0.185475	-8.70851	3.07895e-18	9.58841e-16	Yes	OK	195.494	319.808	102.258	356.904	336.02	266.5	137.489	96.3566	100.049	75.1374
ENSMUSG00000029673	Auts2	319974	autism susceptibility candidate 2	chr5:131437681-132542343	-	1.67188	0.192151	8.70089	3.29299e-18	1.00219e-15	Yes	OK	250.06	103.517	359.968	76.2806	128.188	106.083	389.551	355.449	281.02	413.852
ENSMUSG00000061232	H2-K1	14972	histocompatibility 2, K1, K region	chr17:33996011-34000333	-	2.31792	0.267037	8.68013	3.95301e-18	1.17633e-15	Yes	OK	2414.19	595.946	3777.88	657.572	356.12	774.144	4706.69	1948.54	4044.62	4411.64
ENSMUSG00000006205	Htra1	56213	HtrA serine peptidase 1	chr7:130936202-130985658	+	-1.97468	0.22805	-8.65897	4.76027e-18	1.38575e-15	Yes	OK	693.555	1253.65	273.486	1491.65	885.56	1383.73	197.067	207.702	395.782	293.394
ENSMUSG00000029814	Igf2bp3	140488	insulin-like growth factor 2 mRNA binding protein 3	chr6:49085217-49214954	-	2.42714	0.280718	8.64617	5.32584e-18	1.51741e-15	Yes	OK	84.745	19.2797	133.844	27.2828	15.5495	15.0068	105.408	81.3678	187.592	161.009
ENSMUSG00000042363	Lgalsl	216551	lectin, galactoside binding-like	chr11:20823354-20831108	-	-0.945965	0.109708	-8.62258	6.5462e-18	1.81975e-15	Yes	OK	541.452	753.119	382.702	736.08	805.537	717.739	357.47	391.85	404.609	376.88
ENSMUSG00000035545	Leng8	232798	leukocyte receptor cluster (LRC) member 8	chr7:4137055-4148173	+	1.39242	0.161521	8.62063	6.65876e-18	1.81975e-15	Yes	OK	775.619	388.444	1066	331.848	339.812	493.672	1154.9	937.87	1001.22	1170
ENSMUSG00000029718	Pcolce	18542	procollagen C-endopeptidase enhancer protein	chr5:137605106-137611404	-	2.13021	0.247663	8.60126	7.88485e-18	2.11172e-15	Yes	OK	261.489	77.6902	399.339	107.461	55.7505	69.8593	238.314	338.319	509.072	511.65
ENSMUSG00000033342	Plppr5	75769	phospholipid phosphatase related 5	chr3:117575226-117689508	+	-1.17915	0.137261	-8.5906	8.65136e-18	2.27158e-15	Yes	OK	562.161	828.586	362.342	793.429	845.738	846.591	417.049	376.861	375.183	280.275
ENSMUSG00000097589	Dleu2	668253	deleted in lymphocytic leukemia, 2	chr14:61602835-61682373	-	1.0312	0.120285	8.57299	1.00829e-17	2.59653e-15	Yes	OK	262.869	162.632	338.047	165.367	165.734	156.795	352.888	306.2	347.229	345.871
ENSMUSG00000058145	Adamts17	233332	a disintegrin-like and metallopeptidase (reprolysin type) with thrombospondin type 1 motif, 17	chr7:66839734-67152625	+	1.80497	0.210881	8.55916	1.1369e-17	2.8725e-15	Yes	OK	85.6805	33.0601	125.146	26.1692	36.7877	36.2233	87.0761	145.605	123.59	144.312
ENSMUSG00000000247	Lhx2	16870	LIM homeobox protein 2	chr2:38351307-38369737	+	2.45635	0.287243	8.55147	1.21528e-17	3.01366e-15	Yes	OK	36.5232	8.13643	57.8133	10.5791	6.06808	7.76214	41.2466	53.5314	62.5306	73.9448
ENSMUSG00000051586	Mical3	194401	microtubule associated monooxygenase, calponin and LIM domain containing 3	chr6:120931545-121131022	-	1.02339	0.121896	8.39557	4.63655e-17	1.12887e-14	Yes	OK	585.921	364.388	752.07	370.267	316.678	406.219	765.353	698.05	757.723	787.154
ENSMUSG00000019866	Aim1	11630	absent in melanoma 1	chr10:43950306-44004846	-	2.07687	0.24748	8.39209	4.77594e-17	1.14205e-14	Yes	OK	55.493	16.9379	84.4093	20.6013	13.6532	16.5592	91.6591	64.2377	77.9793	103.761
ENSMUSG00000056515	Rab31	106572	RAB31, member RAS oncogene family	chr17:65651725-65772752	-	-1.36074	0.163397	-8.32782	8.23419e-17	1.93446e-14	Yes	OK	2552.74	3979.44	1482.72	5141.98	3250.59	3545.75	1406.97	1518.15	1531.63	1474.12
ENSMUSG00000040721	Zfhx2	239102	zinc finger homeobox 2	chr14:55061658-55092048	-	1.7355	0.208933	8.30647	9.85947e-17	2.27635e-14	Yes	OK	471.675	187.332	684.932	135.857	149.806	276.332	618.699	758.005	710.641	652.384
ENSMUSG00000051497	Kcnj16	16517	potassium inwardly-rectifying channel, subfamily J, member 16	chr11:110968032-111027967	+	-1.86119	0.225291	-8.26125	1.44152e-16	3.27175e-14	Yes	OK	238.319	417.616	103.846	598.552	345.88	308.416	119.157	111.345	88.2784	96.6053
ENSMUSG00000005836	Gata6	14465	GATA binding protein 6	chr18:11052509-11085635	+	1.8768	0.227486	8.25018	1.58152e-16	3.52968e-14	Yes	OK	53.6191	19.3268	79.3384	20.0445	20.859	17.0767	68.7443	85.6503	89.0141	73.9448
ENSMUSG00000080316	Spaca6	75202	sperm acrosome associated 6	chr17:17830974-17839071	+	1.20976	0.146699	8.24653	1.63057e-16	3.57951e-14	Yes	OK	169.415	95.1642	225.104	95.7683	85.7116	104.013	210.816	244.103	233.202	212.293
ENSMUSG00000029714	Gigyf1	57330	GRB10 interacting GYF protein 1	chr5:137518879-137527935	+	1.46662	0.180333	8.13282	4.19424e-16	9.05889e-14	Yes	OK	289.795	138.184	403.502	118.04	116.431	180.082	398.717	368.296	366.356	480.641
ENSMUSG00000051166	Eml5	319670	echinoderm microtubule associated protein like 5	chr12:98786603-98901484	-	1.03152	0.127329	8.10124	5.44022e-16	1.13833e-13	Yes	OK	409.771	250.787	529.009	233.296	286.717	232.347	591.201	509.619	508.337	506.879
ENSMUSG00000042684	Npl	74091	N-acetylneuraminate pyruvate lyase	chr1:153503015-153549714	-	-1.94889	0.240567	-8.10123	5.44043e-16	1.13833e-13	Yes	OK	75.9937	138.429	29.1669	168.151	131.222	115.915	27.4977	19.2713	35.3114	34.5871
ENSMUSG00000000594	Gm2a	14667	GM2 ganglioside activator protein	chr11:55097984-55113028	+	-1.32771	0.164349	-8.07861	6.55104e-16	1.34962e-13	Yes	OK	858.12	1326.07	507.155	1621.38	1363.8	993.037	527.04	503.195	529.671	468.714
ENSMUSG00000027668	Mfn1	67414	mitofusin 1	chr3:32529481-32579225	+	-1.21753	0.151596	-8.03146	9.63229e-16	1.95433e-13	Yes	OK	559.026	839.617	348.583	672.049	978.478	868.325	348.305	334.036	384.011	327.981
ENSMUSG00000017677	Wsb1	78889	WD repeat and SOCS box-containing 1	chr11:79239382-79243024	-	0.967973	0.120601	8.02622	1.00526e-15	2.00917e-13	Yes	OK	542.162	347.968	687.808	367.483	329.193	347.226	692.026	584.563	736.389	738.255
ENSMUSG00000085794	Vax2os	574519	ventral anterior homeobox 2, opposite strand	chr6:83702126-83710806	-	2.9303	0.368853	7.94435	1.95217e-15	3.84435e-13	Yes	OK	30.3898	2.17605	51.5502	5.01113	1.51702	0	87.0761	27.8363	41.1966	50.0916
ENSMUSG00000017756	Slc12a7	20499	solute carrier family 12, member 7	chr13:73763696-73816742	+	2.01564	0.254093	7.93268	2.14469e-15	4.16225e-13	Yes	OK	178.022	55.2704	270.085	63.4744	32.9952	69.3418	375.802	167.018	275.134	262.385
ENSMUSG00000020827	Mink1	50932	misshapen-like kinase 1 (zebrafish)	chr11:70562880-70614482	+	0.891994	0.11301	7.89303	2.94935e-15	5.64211e-13	Yes	OK	502.972	335.486	628.586	340.757	311.748	353.954	646.197	561.009	664.295	642.842
ENSMUSG00000035246	Pcyt1b	236899	phosphate cytidylyltransferase 1, choline, beta isoform	chrX:93675111-93749948	+	-1.08676	0.137926	-7.87928	3.29263e-15	6.21009e-13	Yes	OK	385.327	560.249	254.135	596.882	526.027	557.839	206.233	312.623	266.307	231.376
ENSMUSG00000044071	Fam19a2	268354	family with sequence similarity 19, member A2	chr10:123264075-123741204	+	-1.32485	0.16877	-7.85003	4.1595e-15	7.7361e-13	Yes	OK	263.33	407.023	155.56	455.456	420.973	344.639	132.906	203.419	136.832	149.082
ENSMUSG00000026365	Cfh	12628	complement component factor h	chr1:140085854-140183411	-	-1.94466	0.247927	-7.84367	4.37572e-15	8.02675e-13	Yes	OK	82.2945	152.343	29.7578	166.481	166.872	123.677	9.16591	34.2601	43.4036	32.2018
ENSMUSG00000036707	Cab39	12283	calcium binding protein 39	chr1:85793446-85851577	+	-0.812609	0.103727	-7.83415	4.72019e-15	8.54163e-13	Yes	OK	782.205	1045.63	584.636	1058.46	1092.63	985.792	540.789	597.411	623.099	577.246
ENSMUSG00000044770	Scml4	268297	sex comb on midleg-like 4 (Drosophila)	chr10:42860511-42960782	+	-1.61569	0.206333	-7.83049	4.85965e-15	8.67674e-13	Yes	OK	262.737	438.139	131.186	296.77	497.582	520.063	123.74	154.17	138.303	108.532
ENSMUSG00000056972	Magel2	27385	melanoma antigen, family L, 2	chr7:62376978-62381640	+	2.76106	0.352731	7.82766	4.97036e-15	8.75764e-13	Yes	OK	20.23	2.21203	33.7435	1.67038	3.41329	1.55243	32.0807	23.5538	31.6331	47.7063
ENSMUSG00000040274	Cdk6	12571	cyclin-dependent kinase 6	chr5:3343892-3531005	+	1.69048	0.216257	7.81703	5.40854e-15	9.40595e-13	Yes	OK	218.57	88.759	315.929	118.04	61.8186	86.4185	334.556	250.527	280.284	398.348
ENSMUSG00000075273	Ttc30b	72421	tetratricopeptide repeat domain 30B	chr2:75935849-75938462	-	-2.2809	0.292504	-7.79784	6.29738e-15	1.08113e-12	Yes	OK	58.417	115.296	15.7577	155.345	100.503	90.0408	9.16591	10.7063	16.92	26.2385
ENSMUSG00000038718	Pbx3	18516	pre B cell leukemia homeobox 3	chr2:34171456-34372045	-	1.48028	0.190048	7.78899	6.75486e-15	1.14499e-12	Yes	OK	135.884	64.613	189.337	47.8842	70.9207	75.034	146.655	205.561	196.42	208.715
ENSMUSG00000042846	Lrrtm3	216028	leucine rich repeat transmembrane neuronal 3	chr10:63928496-64090255	-	-0.949362	0.122098	-7.77541	7.5204e-15	1.25882e-12	Yes	OK	535.319	743.925	378.864	772.828	673.936	785.011	366.636	417.545	391.368	339.907
ENSMUSG00000032554	Trf	22041	transferrin	chr9:103208875-103230286	-	-1.33953	0.172434	-7.76837	7.9505e-15	1.31438e-12	Yes	OK	729.161	1140.21	420.877	1309.58	1008.82	1102.22	297.892	383.285	490.681	511.65
ENSMUSG00000005533	Igf1r	16001	insulin-like growth factor I receptor	chr7:67952256-68233667	+	1.12336	0.145097	7.74216	9.77426e-15	1.59618e-12	Yes	OK	1098.49	644.896	1438.69	550.111	601.119	783.459	1306.14	1353.27	1554.44	1540.91
ENSMUSG00000015579	Nkx2-5	18091	NK2 homeobox 5	chr17:26838664-26841565	-	3.02588	0.391116	7.73654	1.0216e-14	1.64823e-12	Yes	OK	12.1332	0.172492	21.1037	0	0	0.517476	13.7489	17.1301	21.334	32.2018
ENSMUSG00000049690	Nckap5	210356	NCK-associated protein 5	chr1:125913635-126830632	-	1.15887	0.150343	7.70818	1.2762e-14	2.03447e-12	Yes	OK	223.895	126.826	296.696	138.641	108.846	132.991	343.722	289.07	258.214	295.779
ENSMUSG00000067276	Capn6	12338	calpain 6	chrX:143802236-143827412	-	1.83714	0.239487	7.67114	1.70471e-14	2.68561e-12	Yes	OK	107.87	39.9103	158.84	32.8508	35.65	51.2301	109.991	143.464	228.053	153.853
ENSMUSG00000069170	Adgrv1	110789	adhesion G protein-coupled receptor V1	chr13:81095067-81633144	-	1.34487	0.175809	7.64958	2.0164e-14	3.13972e-12	Yes	OK	410.606	210.59	560.618	197.105	194.558	240.109	586.618	391.85	578.224	685.778
ENSMUSG00000029126	Nsg1	18196	neuron specific gene family member 1	chr5:38137192-38159467	-	-1.04975	0.138555	-7.57644	3.55176e-14	5.46685e-12	Yes	OK	677.819	973.675	455.927	940.979	1133.97	846.073	398.717	498.913	484.796	441.283
ENSMUSG00000049929	Lpar4	78134	lysophosphatidic acid receptor 4	chrX:106920624-106933899	+	2.27041	0.300187	7.56331	3.92925e-14	5.97916e-12	Yes	OK	65.4296	15.8814	102.591	25.0557	13.2739	9.31457	73.3273	70.6615	137.567	128.807
ENSMUSG00000027004	Frzb	20378	frizzled-related protein	chr2:80411969-80447396	-	-1.93167	0.256475	-7.5316	5.01233e-14	7.54158e-12	Yes	OK	80.6223	145.024	32.3209	190.98	145.255	98.8379	36.6636	29.9776	31.6331	31.0091
ENSMUSG00000000058	Cav2	12390	caveolin 2	chr6:17281184-17282684	+	-1.38286	0.184204	-7.50723	6.03901e-14	8.97412e-12	Yes	OK	630.633	995.704	356.829	1262.81	850.29	874.017	307.058	368.296	450.22	301.742
ENSMUSG00000023019	Gpd1	14555	glycerol-3-phosphate dehydrogenase 1 (soluble)	chr15:99717592-99725007	+	-1.63491	0.217815	-7.50595	6.09846e-14	8.97412e-12	Yes	OK	120.864	207.386	55.9736	168.151	219.589	234.417	32.0807	55.6727	76.508	59.6329
ENSMUSG00000079259	Trim71	636931	tripartite motif-containing 71	chr9:114511272-114564369	-	2.3478	0.313012	7.50067	6.34927e-14	9.24164e-12	Yes	OK	39.5922	8.2683	63.0851	8.35189	4.55106	11.9019	68.7443	70.6615	38.9896	73.9448
ENSMUSG00000021495	Fam193b	212483	family with sequence similarity 193, member B	chr13:55539315-55571120	-	1.1719	0.156895	7.46938	8.05746e-14	1.16019e-11	Yes	OK	412.08	233.78	545.805	223.274	191.903	286.164	554.538	565.292	473.025	590.365
ENSMUSG00000041734	Kirrel	170643	kin of IRRE like (Drosophila)	chr3:87078591-87174747	-	1.29924	0.173983	7.46762	8.1659e-14	1.16329e-11	Yes	OK	182.951	97.8902	246.747	115.813	84.1946	93.6632	192.484	276.222	286.905	231.376
ENSMUSG00000054667	Irs4	16370	insulin receptor substrate 4	chrX:141710997-141725217	-	2.56626	0.343848	7.46334	8.43587e-14	1.1891e-11	Yes	OK	28.7731	4.42276	47.0359	2.78396	5.30957	5.17476	27.4977	29.9776	50.7601	79.9081
ENSMUSG00000023959	Clic5	224796	chloride intracellular channel 5	chr17:44188571-44280168	+	-1.71433	0.230544	-7.43603	1.03759e-13	1.44733e-11	Yes	OK	665.695	1139.25	310.527	694.877	1455.58	1267.3	320.807	413.263	261.157	246.88
ENSMUSG00000031808	Slc27a1	26457	solute carrier family 27 (fatty acid transporter), member 1	chr8:71568926-71586708	+	1.25304	0.169435	7.39538	1.41001e-13	1.94653e-11	Yes	OK	145.534	78.9942	195.439	67.9287	95.5722	73.4816	174.152	201.278	196.42	209.908
ENSMUSG00000048376	F2r	14062	coagulation factor II (thrombin) receptor	chr13:95601788-95618433	-	-1.05211	0.142319	-7.3926	1.43984e-13	1.96744e-11	Yes	OK	319.792	461.084	213.823	480.512	426.662	476.078	206.233	203.419	256.007	189.633
ENSMUSG00000033350	Chst2	54371	carbohydrate sulfotransferase 2	chr9:95400925-95407270	-	-1.27884	0.173141	-7.38614	1.51155e-13	2.04457e-11	Yes	OK	1704.82	2611.5	1024.81	2404.23	2117.38	3312.88	861.595	1203.39	1077.73	956.511
ENSMUSG00000028354	Fmn2	54418	formin 2	chr1:174501824-174822729	+	1.1748	0.159361	7.37194	1.68161e-13	2.25185e-11	Yes	OK	586.506	330.787	778.295	323.496	270.409	398.457	866.178	832.949	640.019	774.035
ENSMUSG00000004360	9330159F19Rik	212448	RIKEN cDNA 9330159F19 gene	chr10:29211642-29230779	+	-1.18916	0.16201	-7.34003	2.13548e-13	2.83131e-11	Yes	OK	260.078	392.53	160.739	441.536	351.569	384.485	137.489	132.758	179.499	193.211
ENSMUSG00000039601	Rcan2	53901	regulator of calcineurin 2	chr17:43804002-44039516	+	-1.27895	0.174489	-7.32967	2.30722e-13	3.02902e-11	Yes	OK	387.105	586.567	237.509	673.162	610.98	475.56	293.309	261.233	192.741	202.752
ENSMUSG00000046324	Ermp1	226090	endoplasmic reticulum metallopeptidase 1	chr19:29609882-29648420	-	-1.08438	0.148082	-7.32279	2.42861e-13	3.15742e-11	Yes	OK	826.434	1204.44	542.931	1148.66	1117.66	1346.99	394.134	569.574	606.914	601.099
ENSMUSG00000003411	Rab3b	69908	RAB3B, member RAS oncogene family	chr4:108879069-108943324	+	-1.71584	0.23518	-7.29586	2.96766e-13	3.82114e-11	Yes	OK	157.113	270.858	71.8036	179.287	287.096	346.191	54.9955	96.3566	75.0367	60.8255
ENSMUSG00000056116	H2-T22	15039	histocompatibility 2, T region locus 22	chr17:36038408-36042702	-	1.56726	0.214885	7.29348	3.02048e-13	3.85211e-11	Yes	OK	226.156	98.7938	321.678	102.45	88.3664	105.565	389.551	177.724	350.907	368.531
ENSMUSG00000056116	H2-T9	15051	histocompatibility 2, T region locus 9	chr17:36038408-36042692	-	1.56726	0.214885	7.29348	3.02048e-13	3.85211e-11	Yes	OK	226.156	98.7938	321.678	102.45	88.3664	105.565	389.551	177.724	350.907	368.531
ENSMUSG00000019929	Dcn	13179	decorin	chr10:97479499-97518163	+	-2.49088	0.341877	-7.28588	3.19589e-13	4.03737e-11	Yes	OK	65.472	135.722	12.7847	236.08	102.778	68.3068	9.16591	12.8475	18.3913	10.7339
ENSMUSG00000047976	Kcna1	16485	potassium voltage-gated channel, shaker-related subfamily, member 1	chr6:126636462-126645801	-	-1.07071	0.147153	-7.27621	3.43327e-13	4.29672e-11	Yes	OK	230.532	335.554	151.765	305.122	378.117	323.423	128.323	152.029	163.315	163.394
ENSMUSG00000031538	Plat	18791	plasminogen activator, tissue	chr8:22757721-22782848	+	-1.03675	0.142535	-7.27369	3.49786e-13	4.33702e-11	Yes	OK	615.543	886.962	411.978	908.685	874.562	877.639	302.475	432.534	500.244	412.66
ENSMUSG00000036766	Dner	227325	delta/notch-like EGF repeat containing	chr1:84369838-84696221	-	-1.12065	0.15458	-7.24966	4.17809e-13	5.13292e-11	Yes	OK	581.122	849.186	380.074	960.467	931.45	655.642	384.968	404.698	350.171	380.458
ENSMUSG00000028064	Sema4a	20351	sema domain, immunoglobulin domain (Ig), transmembrane domain (TM) and short cytoplasmic domain, (semaphorin) 4A	chr3:88435961-88455761	-	1.53713	0.212492	7.23383	4.69544e-13	5.69065e-11	Yes	OK	67.6594	30.7706	95.3259	33.4076	31.4782	27.4262	87.0761	79.2265	99.3132	115.688
ENSMUSG00000037664	Cdkn1c	12577	cyclin-dependent kinase inhibitor 1C (P57)	chr7:143458338-143461050	-	1.92441	0.266051	7.23321	4.71706e-13	5.69065e-11	Yes	OK	41.9499	14.162	62.7908	11.1359	14.7909	16.5592	50.4125	51.3902	80.1862	69.1741
ENSMUSG00000059851	Kmt5c	232811	lysine methyltransferase 5C	chr7:4740126-4747514	+	1.22166	0.169429	7.21044	5.57696e-13	6.66795e-11	Yes	OK	148.117	81.9196	197.765	75.7238	70.1622	99.8729	187.901	199.137	190.534	213.486
ENSMUSG00000019970	Sgk1	20393	serum/glucocorticoid regulated kinase 1	chr10:21993889-21999902	+	-0.996386	0.138561	-7.19093	6.43492e-13	7.62566e-11	Yes	OK	358.972	507.757	247.384	471.603	486.584	565.084	256.645	201.278	259.686	271.926
ENSMUSG00000020728	Cep112	76380	centrosomal protein 112	chr11:108682608-108860615	+	1.55068	0.215695	7.18924	6.5154e-13	7.65331e-11	Yes	OK	66.7289	29.057	94.9827	25.0557	26.9271	35.1884	100.825	107.063	89.7497	82.2934
ENSMUSG00000036502	Tmem255a	245386	transmembrane protein 255A	chrX:38197296-38252481	-	-1.89662	0.263963	-7.18519	6.71141e-13	7.81499e-11	Yes	OK	377.898	679.8	151.472	1145.32	487.343	406.736	151.238	149.888	154.487	150.275
ENSMUSG00000040312	Cchcr1	240084	coiled-coil alpha-helical rod protein 1	chr17:35517115-35531015	+	1.62414	0.226424	7.17299	7.33759e-13	8.47049e-11	Yes	OK	81.0641	33.6815	116.601	26.1692	34.5122	40.3631	114.574	117.769	89.7497	144.312
ENSMUSG00000024338	Psmb8	16913	proteasome (prosome, macropain) subunit, beta type 8 (large multifunctional peptidase 7)	chr17:34198194-34201454	+	1.86515	0.260096	7.17102	7.44409e-13	8.51998e-11	Yes	OK	416.185	142.453	621.485	129.733	102.02	195.606	797.434	301.917	665.031	721.558
ENSMUSG00000042625	Safb2	224902	scaffold attachment factor B2	chr17:56562941-56584583	-	1.40866	0.196629	7.16406	7.83197e-13	8.88796e-11	Yes	OK	396.44	193.829	548.398	159.799	152.081	269.605	494.959	558.868	492.152	647.613
ENSMUSG00000017446	C1qtnf1	56745	C1q and tumor necrosis factor related protein 1	chr11:118433800-118451782	+	2.0837	0.292304	7.12855	1.01433e-12	1.14142e-10	Yes	OK	81.3735	23.4356	124.827	25.0557	17.825	27.4262	50.4125	102.78	183.913	162.201
ENSMUSG00000073411	H2-L	14980	histocompatibility 2, D region locus L	chr17:35263122-35266730	+	1.72193	0.24228	7.10718	1.18434e-12	1.32162e-10	Yes	OK	2547	983.076	3719.94	1131.4	629.184	1188.64	4514.21	2194.79	4001.22	4169.53
ENSMUSG00000073411	H2-D1	14964	histocompatibility 2, D region locus 1	chr17:35263093-35267497	+	1.72193	0.24228	7.10718	1.18434e-12	1.32162e-10	Yes	OK	2547	983.076	3719.94	1131.4	629.184	1188.64	4514.21	2194.79	4001.22	4169.53
ENSMUSG00000038453	Srcin1	56013	SRC kinase signaling inhibitor 1	chr11:97509339-97575126	-	1.31712	0.187119	7.03894	1.93705e-12	2.1429e-10	Yes	OK	242.503	127.245	328.947	107.461	154.736	119.537	224.565	327.612	370.034	393.577
ENSMUSG00000042700	Sipa1l1	217692	signal-induced proliferation-associated 1 like 1	chr12:82311348-82451784	+	1.08418	0.15405	7.03785	1.95231e-12	2.1429e-10	Yes	OK	745.553	447.815	968.856	465.479	373.945	504.022	756.188	959.283	1086.56	1073.39
ENSMUSG00000036295	Lrrn3	16981	leucine rich repeat protein 3, neuronal	chr12:41451667-41486057	-	-1.14835	0.163526	-7.0224	2.18091e-12	2.37436e-10	Yes	OK	312.569	461.651	200.757	552.338	465.725	366.891	201.65	205.561	213.34	182.477
ENSMUSG00000001761	Smo	319757	smoothened, frizzled class receptor	chr6:29735496-29761366	+	1.20014	0.171571	6.99501	2.65236e-12	2.86433e-10	Yes	OK	113.632	64.0223	150.84	66.2583	69.4036	56.4049	128.323	152.029	150.073	172.935
ENSMUSG00000022865	Cxadr	13052	coxsackie virus and adenovirus receptor	chr16:78301670-78340759	+	-0.912217	0.130528	-6.98866	2.77525e-12	2.97307e-10	Yes	OK	644.924	881.197	467.718	807.349	926.52	909.723	545.372	481.783	456.105	387.614
ENSMUSG00000030774	Pak1	18479	p21 protein (Cdc42/Rac)-activated kinase 1	chr7:97842938-97912381	+	-1.12057	0.160725	-6.97198	3.12502e-12	3.32121e-10	Yes	OK	532.435	778.041	348.231	606.347	934.484	793.291	366.636	351.166	308.975	366.146
ENSMUSG00000021709	Erbin	59079	Erbb2 interacting protein	chr13:103818785-103920586	-	-0.642127	0.0923338	-6.95442	3.54027e-12	3.7329e-10	Yes	OK	1494.39	1887.46	1199.58	1929.29	1844.32	1888.79	1205.32	1122.02	1252.08	1218.9
ENSMUSG00000054484	Tmem62	96957	transmembrane protein 62	chr2:120977061-121007842	+	-1.18838	0.17138	-6.93421	4.08485e-12	4.27346e-10	Yes	OK	116.004	172.648	73.522	189.309	170.285	158.348	77.9102	72.8027	70.6227	72.7521
ENSMUSG00000097736	9530059O14Rik	319626	RIKEN cDNA 9530059O14 gene	chr9:122572500-122580647	+	2.32672	0.336691	6.91053	4.82841e-12	5.01219e-10	Yes	OK	60.9605	12.0391	97.6515	12.2494	8.34361	15.5243	87.0761	29.9776	147.131	126.422
ENSMUSG00000012519	Mlkl	74568	mixed lineage kinase domain-like	chr8:111311797-111338205	-	1.18416	0.171412	6.90825	4.90678e-12	5.05436e-10	Yes	OK	110.261	62.1057	146.377	59.02	61.06	66.2369	155.82	117.769	154.487	157.431
ENSMUSG00000093445	Lrch4	231798	leucine-rich repeats and calponin homology (CH) domain containing 4	chr5:137629122-137641099	+	1.30726	0.19052	6.8615	6.81428e-12	6.96565e-10	Yes	OK	139.457	71.4577	190.457	75.7238	56.8882	81.7612	233.731	158.453	163.315	206.33
ENSMUSG00000024827	Gldc	104174	glycine decarboxylase	chr19:30098440-30175441	-	-0.97543	0.14228	-6.85571	7.09585e-12	7.19853e-10	Yes	OK	261.179	366.915	181.876	319.599	403.906	377.24	187.901	162.736	192.006	184.862
ENSMUSG00000034771	Tle2	21886	transducin-like enhancer of split 2	chr10:81575286-81590473	+	1.26389	0.184977	6.83265	8.33615e-12	8.39318e-10	Yes	OK	380.351	201.598	514.415	192.093	176.733	235.969	604.95	453.946	377.39	621.375
ENSMUSG00000074151	Nlrc5	434341	NLR family, CARD domain containing 5	chr8:94472762-94527272	+	2.49825	0.365996	6.82591	8.73708e-12	8.73121e-10	Yes	OK	869.021	112.166	1436.66	108.018	60.3015	168.18	1966.09	650.942	1297.69	1831.92
ENSMUSG00000072494	Ppp1r3e	105651	protein phosphatase 1, regulatory (inhibitor) subunit 3E	chr14:54875596-54877538	-	1.92699	0.282657	6.8174	9.26998e-12	9.19514e-10	Yes	OK	33.8534	10.5058	51.364	7.2383	12.8947	11.3845	45.8295	62.0964	42.6679	54.8622
ENSMUSG00000037965	Zc3h7a	106205	zinc finger CCCH type containing 7 A	chr16:11136593-11176393	-	0.741332	0.109043	6.79854	1.05687e-11	1.04063e-09	Yes	OK	498.129	357.419	603.661	367.483	333.744	371.03	637.031	554.585	632.662	590.365
ENSMUSG00000037852	Cpe	12876	carboxypeptidase E	chr8:64592550-64693109	-	-1.0202	0.150116	-6.79605	1.07528e-11	1.05103e-09	Yes	OK	1973.84	2811.22	1345.81	3410.35	2670.33	2352.96	1177.82	1473.18	1315.35	1416.88
ENSMUSG00000010476	Ebf3	13593	early B cell factor 3	chr7:137193670-137314445	-	1.90125	0.281055	6.7647	1.33585e-11	1.29625e-09	Yes	OK	57.0225	18.102	86.2129	10.0223	20.4798	23.8039	77.9102	119.91	64.7375	82.2934
ENSMUSG00000029675	Eln	13717	elastin	chr5:134702594-134747323	-	1.24769	0.184603	6.75876	1.39175e-11	1.34079e-09	Yes	OK	127.219	66.5949	172.686	57.3496	72.0584	70.3767	206.233	192.713	142.717	149.082
ENSMUSG00000033676	Gabrb3	14402	gamma-aminobutyric acid (GABA) A receptor, subunit beta 3	chr7:57590517-57828801	+	-0.865048	0.128162	-6.74964	1.48216e-11	1.41769e-09	Yes	OK	542.683	736.939	396.991	807.349	739.547	663.922	357.47	464.653	381.804	384.036
ENSMUSG00000037991	Rmi2	223970	RecQ mediated genome instability 2	chr16:10835058-10843235	+	2.05733	0.305119	6.74273	1.55441e-11	1.47625e-09	Yes	OK	56.7214	14.7659	88.188	5.56793	20.1005	18.6291	119.157	85.6503	63.2662	84.6787
ENSMUSG00000034810	Scn7a	20272	sodium channel, voltage-gated, type VII, alpha	chr2:66673425-66784910	-	-1.87976	0.278868	-6.74068	1.57651e-11	1.48669e-09	Yes	OK	148.033	267.343	58.5507	440.423	182.042	179.564	64.1614	49.2489	64.7375	56.0549
ENSMUSG00000032198	Dock6	319899	dedicator of cytokinesis 6	chr9:21800179-21852635	-	1.11139	0.165127	6.73055	1.69029e-11	1.58284e-09	Yes	OK	169.857	100.833	221.625	115.256	81.1606	106.083	197.067	224.832	242.766	221.834
ENSMUSG00000013584	Aldh1a2	19378	aldehyde dehydrogenase family 1, subfamily A2	chr9:71215788-71296243	+	-2.02736	0.301636	-6.72121	1.80227e-11	1.67598e-09	Yes	OK	38.6269	71.9865	13.6072	72.383	67.5074	76.069	22.9148	6.42377	19.127	5.96329
ENSMUSG00000085925	Rtl1	353326	retrotransposon-like 1	chr12:109590168-109595403	-	1.52841	0.228063	6.70171	2.05989e-11	1.88944e-09	Yes	OK	70.1718	31.713	99.0159	25.0557	29.2026	40.8806	87.0761	83.509	107.405	118.073
ENSMUSG00000013698	Pea15a	18611	phosphoprotein enriched in astrocytes 15A	chr1:172196727-172206804	-	-1.00263	0.149609	-6.7017	2.06003e-11	1.88944e-09	Yes	OK	2172.71	3072.79	1497.65	3576.84	3203.19	2438.35	1585.7	1618.79	1410.98	1375.13
ENSMUSG00000071226	Cecr2	330409	cat eye syndrome chromosome region, candidate 2	chr6:120666420-120771191	+	1.81247	0.270508	6.70024	2.08081e-11	1.89552e-09	Yes	OK	80.1117	26.8418	120.064	30.6236	29.2026	20.699	201.65	70.6615	102.992	104.954
ENSMUSG00000050288	Fzd2	57265	frizzled class receptor 2	chr11:102604430-102608058	+	2.10234	0.314956	6.67504	2.47173e-11	2.23641e-09	Yes	OK	44.9435	11.73	69.8536	20.6013	6.82659	7.76214	64.1614	53.5314	69.8871	91.8346
ENSMUSG00000030411	Nova2	384569	neuro-oncological ventral antigen 2	chr7:18925887-18965319	+	1.2525	0.187786	6.66984	2.56085e-11	2.3015e-09	Yes	OK	250.41	134.137	337.615	136.414	93.676	172.32	348.305	351.166	307.503	343.485
ENSMUSG00000073409	H2-Q6	110557	histocompatibility 2, Q region locus 6	chr17:35424876-35428361	+	2.5233	0.378633	6.66425	2.66019e-11	2.37484e-09	Yes	OK	449.584	46.1911	752.128	40.6459	22.376	75.5515	1127.41	327.612	793.77	759.723
ENSMUSG00000073409	H2-Q8	15019	histocompatibility 2, Q region locus 8	chr17:35424846-35428361	+	2.5233	0.378633	6.66425	2.66019e-11	2.37484e-09	Yes	OK	449.584	46.1911	752.128	40.6459	22.376	75.5515	1127.41	327.612	793.77	759.723
ENSMUSG00000016349	Eef1a2	13628	eukaryotic translation elongation factor 1 alpha 2	chr2:181147691-181157015	-	-0.847956	0.127683	-6.64112	3.11308e-11	2.76075e-09	Yes	OK	590.758	797.998	435.328	849.109	844.221	700.663	412.466	443.24	400.196	485.412
ENSMUSG00000044037	Als2cl	235633	ALS2 C-terminal like	chr9:110880173-110900530	+	1.32606	0.199801	6.63692	3.203e-11	2.81642e-09	Yes	OK	64.845	33.361	88.458	30.6236	33.7537	35.7058	82.4932	89.9328	91.9567	89.4493
ENSMUSG00000040254	Sema3d	108151	sema domain, immunoglobulin domain (Ig), short basic domain, secreted, (semaphorin) 3D	chr5:12383165-12588943	+	-1.07873	0.162552	-6.63624	3.21793e-11	2.81642e-09	Yes	OK	2123.06	3081.35	1404.35	3643.09	2780.7	2820.24	1219.07	1323.3	1771.45	1303.57
ENSMUSG00000067274	Rplp0	11837	ribosomal protein, large, P0	chr5:115559466-115563729	+	-1.23222	0.186087	-6.62173	3.55018e-11	3.08704e-09	Yes	OK	902.33	1371.48	550.464	1013.92	1515.5	1585.03	449.13	541.738	506.13	704.861
ENSMUSG00000030703	Gdpd3	68616	glycerophosphodiester phosphodiesterase domain containing 3	chr7:126766413-126775645	+	2.24943	0.341245	6.59184	4.34422e-11	3.75312e-09	Yes	OK	36.0451	6.97375	57.8486	10.0223	4.1718	6.72719	100.825	23.5538	58.1166	48.899
ENSMUSG00000035929	H2-Q4	15015	histocompatibility 2, Q region locus 4	chr17:35379616-35384674	+	2.45699	0.37351	6.57812	4.7645e-11	4.08983e-09	Yes	OK	708.645	86.1046	1175.55	54.0089	48.5446	155.76	1471.13	648.801	1257.23	1325.04
ENSMUSG00000056724	Nbeal2	235627	neurobeachin-like 2	chr9:110624788-110654161	-	1.18813	0.180697	6.57525	4.85723e-11	4.14288e-09	Yes	OK	83.6136	46.2373	111.646	46.2138	44.3728	48.1253	119.157	109.204	103.727	114.495
ENSMUSG00000030231	Plekha5	109135	pleckstrin homology domain containing, family A member 5	chr6:140424098-140594906	+	1.07614	0.163848	6.56793	5.1018e-11	4.29674e-09	Yes	OK	290.566	174.283	377.778	157.015	211.624	154.208	329.973	368.296	356.056	456.788
ENSMUSG00000046008	Pnlip	69060	pancreatic lipase	chr19:58670364-58681788	+	-1.16642	0.17816	-6.54704	5.86887e-11	4.91188e-09	Yes	OK	808.743	1208.96	508.582	1144.21	1404.76	1077.9	329.973	631.671	525.257	547.43
ENSMUSG00000024985	Tcf7l2	21416	transcription factor 7 like 2, T cell specific, HMG box	chr19:55741809-55933655	+	1.2108	0.184995	6.54504	5.94802e-11	4.93071e-09	Yes	OK	124.475	68.4213	166.515	75.167	51.9579	78.1389	178.735	160.594	172.879	153.853
ENSMUSG00000039852	Rere	68703	arginine glutamic acid dipeptide (RE) repeats	chr4:150281915-150621966	+	0.943793	0.144209	6.54461	5.96501e-11	4.93071e-09	Yes	OK	759.546	489.561	962.034	472.16	399.355	597.167	934.923	1012.81	962.971	937.429
ENSMUSG00000044288	Cnr1	12801	cannabinoid receptor 1 (brain)	chr4:33924631-33948831	+	-1.66215	0.254437	-6.53264	6.46186e-11	5.30863e-09	Yes	OK	145.238	248.34	67.9124	200.445	374.325	170.25	64.1614	81.3678	67.6801	58.4402
ENSMUSG00000028173	Wls	68151	wntless homolog (Drosophila)	chr3:159839694-159935175	+	-0.992699	0.152134	-6.52516	6.79281e-11	5.54649e-09	Yes	OK	340.761	482.06	234.787	562.36	394.804	489.015	233.731	231.256	252.329	221.834
ENSMUSG00000029817	Tra2a	101214	transformer 2 alpha homolog (Drosophila)	chr6:49243920-49264052	-	0.780183	0.119654	6.52033	7.0155e-11	5.69361e-09	Yes	OK	670.716	472.366	819.479	482.182	444.866	490.05	838.681	698.05	827.61	913.576
ENSMUSG00000036913	Trim67	330863	tripartite motif-containing 67	chr8:124793018-124834704	+	1.05523	0.162156	6.50748	7.64205e-11	6.16474e-09	Yes	OK	406.979	246.332	527.465	300.668	187.352	250.976	517.874	558.868	552.476	480.641
ENSMUSG00000074024	4632427E13Rik	666737	RIKEN cDNA 4632427E13 gene	chr7:92740705-92741459	-	0.985206	0.151544	6.50113	7.97165e-11	6.39212e-09	Yes	OK	218.917	137.504	279.977	145.323	114.535	152.655	293.309	286.928	292.79	246.88
ENSMUSG00000019173	Rab5c	19345	RAB5C, member RAS oncogene family	chr11:100715002-100738215	-	-0.691256	0.106381	-6.49791	8.14421e-11	6.49161e-09	Yes	OK	718.475	921.402	566.28	968.262	934.863	861.08	563.703	597.411	580.431	523.577
ENSMUSG00000026456	Cyb5r1	72017	cytochrome b5 reductase 1	chr1:134405989-134411738	+	1.35742	0.20995	6.46544	1.01007e-10	8.00343e-09	Yes	OK	66.7487	32.2965	92.5878	36.1915	32.2367	28.4612	114.574	87.7915	80.9219	87.064
ENSMUSG00000038457	Tmem255b	272465	transmembrane protein 255B	chr8:13435458-13461451	+	1.94473	0.30175	6.44486	1.1571e-10	9.11455e-09	Yes	OK	65.7042	19.5569	100.315	31.1804	8.34361	19.1466	119.157	102.78	102.992	76.3301
ENSMUSG00000028634	Hivep3	16656	human immunodeficiency virus type I enhancer binding protein 3	chr4:119814677-120135411	+	1.2007	0.186519	6.43742	1.21524e-10	9.46538e-09	Yes	OK	155.681	86.0081	207.936	66.8151	83.0568	108.152	187.901	246.245	191.27	206.33
ENSMUSG00000004347	Pde1c	18575	phosphodiesterase 1C	chr6:56100439-56362392	-	-1.47345	0.228891	-6.43735	1.21578e-10	9.46538e-09	Yes	OK	151.934	246.051	81.3457	341.314	224.519	172.32	96.242	72.8027	82.3932	73.9448
ENSMUSG00000028337	Coro2a	107684	coronin, actin binding protein 2A	chr4:46536936-46566440	-	1.59913	0.248573	6.43326	1.24898e-10	9.66768e-09	Yes	OK	58.4781	23.9111	84.4033	27.2828	29.9611	14.4893	91.6591	81.3678	78.7149	85.8713
ENSMUSG00000009630	Ppp2cb	19053	protein phosphatase 2 (formerly 2A), catalytic subunit, beta isoform	chr8:33599620-33619804	+	-0.843122	0.131255	-6.42356	1.33121e-10	1.02449e-08	Yes	OK	299.9	409.692	217.557	408.686	429.696	390.694	169.569	226.973	243.501	230.183
ENSMUSG00000033577	Myo6	17920	myosin VI	chr9:80165033-80311729	+	-0.740339	0.115276	-6.4223	1.3423e-10	1.02712e-08	Yes	OK	552.206	718.193	427.717	773.942	731.203	649.432	458.295	400.415	415.644	436.513
ENSMUSG00000023031	Cela1	109901	chymotrypsin-like elastase family, member 1	chr15:100674421-100687920	-	-1.40931	0.219999	-6.40599	1.49399e-10	1.1367e-08	Yes	OK	86.3907	138.924	46.991	164.254	133.498	119.019	36.6636	62.0964	52.2314	36.9724
ENSMUSG00000030077	Chl1	12661	cell adhesion molecule L1-like	chr6:103510875-103733035	+	1.57244	0.245669	6.40066	1.54704e-10	1.17042e-08	Yes	OK	820.083	348.532	1173.75	248.886	396.701	400.009	577.452	1391.82	1435.26	1290.46
ENSMUSG00000007476	Lrrc8a	241296	leucine rich repeat containing 8A	chr2:30237768-30263790	+	-0.830365	0.129851	-6.39474	1.60824e-10	1.20988e-08	Yes	OK	572.46	776.077	419.747	778.953	766.853	782.424	307.058	468.935	460.519	442.476
ENSMUSG00000078485	Plekhn1	231002	pleckstrin homology domain containing, family N member 1	chr4:156221455-156228542	-	0.950784	0.14877	6.39094	1.64864e-10	1.23335e-08	Yes	OK	242.306	154.32	308.295	144.209	139.187	179.564	316.224	340.46	269.985	306.513
ENSMUSG00000025421	Hdhd2	76987	haloacid dehalogenase-like hydrolase domain containing 2	chr18:76944114-76972171	+	-0.890496	0.139585	-6.3796	1.7755e-10	1.32087e-08	Yes	OK	276.248	376.043	201.402	423.719	365.981	338.429	210.816	211.984	182.442	200.366
ENSMUSG00000001288	Rarg	19411	retinoic acid receptor, gamma	chr15:102234937-102257522	-	1.09596	0.172041	6.37035	1.886e-10	1.39533e-08	Yes	OK	186.391	111.411	242.627	127.505	94.4345	112.292	178.735	297.635	241.294	252.843
ENSMUSG00000021098	4930447C04Rik	75801	RIKEN cDNA 4930447C04 gene	chr12:72881108-72917765	-	1.94513	0.305509	6.36685	1.9295e-10	1.41967e-08	Yes	OK	24.7865	7.46258	37.7795	8.35189	8.34361	5.69224	36.6636	27.8363	44.8749	41.743
ENSMUSG00000041794	Myrip	245049	myosin VIIA and Rab interacting protein	chr9:120304072-120474834	+	1.47081	0.231309	6.35864	2.03546e-10	1.48944e-08	Yes	OK	82.4295	37.417	116.189	42.3162	46.6484	23.2864	119.157	115.628	105.934	124.036
ENSMUSG00000059173	Pde1a	18573	phosphodiesterase 1A, calmodulin-dependent	chr2:79859024-79908399	-	-1.32698	0.209074	-6.34695	2.19632e-10	1.59842e-08	Yes	OK	158.773	243.278	95.3952	202.116	237.414	290.304	123.74	111.345	71.3584	75.1374
ENSMUSG00000043424	Eif3j2	100042807	eukaryotic translation initiation factor 3, subunit J2	chr2:122028582-122053631	+	-2.49455	0.393286	-6.34282	2.25591e-10	1.63291e-08	Yes	OK	10.373	23.4899	0.535314	24.4989	25.7893	20.1816	0	2.14126	0	0
ENSMUSG00000035392	Dennd1a	227801	DENN/MADD domain containing 1A	chr2:37798989-38287384	-	0.947612	0.149513	6.338	2.32773e-10	1.67584e-08	Yes	OK	273.907	175.905	347.408	192.65	144.117	190.949	375.802	299.776	363.413	350.641
ENSMUSG00000030123	Plxnd1	67784	plexin D1	chr6:115954810-115995005	-	0.993118	0.156767	6.33499	2.37358e-10	1.69971e-08	Yes	OK	720.117	451.186	921.815	425.39	478.999	449.169	829.515	1066.35	1077	714.402
ENSMUSG00000028360	Slc44a5	242259	solute carrier family 44, member 5	chr3:153973435-154271720	+	-1.30314	0.206604	-6.30744	2.83688e-10	2.02067e-08	Yes	OK	182.321	283.211	106.653	232.739	241.206	375.688	91.6591	134.899	102.256	97.7979
ENSMUSG00000025037	Maoa	17161	monoamine oxidase A	chrX:16619697-16687812	+	-0.895764	0.142461	-6.28777	3.2205e-10	2.27225e-08	Yes	OK	253.713	350.611	181.04	384.744	357.637	309.451	164.986	175.583	202.305	181.284
ENSMUSG00000046402	Rbp1	19659	retinol binding protein 1, cellular	chr9:98422960-98446550	+	-1.27448	0.202697	-6.28761	3.22401e-10	2.27225e-08	Yes	OK	206.886	318.575	123.119	378.062	309.093	268.57	123.74	134.899	151.545	82.2934
ENSMUSG00000031024	St5	76954	suppression of tumorigenicity 5	chr7:109523910-109617147	-	1.02192	0.162624	6.28393	3.30129e-10	2.31453e-08	Yes	OK	198.622	123.483	254.976	147.55	105.433	117.467	242.897	222.691	278.813	275.504
ENSMUSG00000053519	Kcnip1	70357	Kv channel-interacting protein 1	chr11:33629779-33843585	-	-0.925015	0.147432	-6.27417	3.51513e-10	2.45162e-08	Yes	OK	294.578	408.969	208.784	396.993	426.283	403.631	178.735	259.092	224.374	172.935
ENSMUSG00000029644	Pdx1	18609	pancreatic and duodenal homeobox 1	chr5:147270130-147275149	+	2.43586	0.388723	6.26632	3.69669e-10	2.56489e-08	Yes	OK	12.8623	0.995227	21.7627	2.22717	0.75851	0	36.6636	10.7063	20.5983	19.0825
ENSMUSG00000030606	Hapln3	67666	hyaluronan and proteoglycan link protein 3	chr7:79117026-79131018	-	1.24599	0.199332	6.25082	4.08303e-10	2.81834e-08	Yes	OK	75.0051	39.3298	101.762	42.873	35.2707	39.8457	114.574	111.345	90.4854	90.642
ENSMUSG00000031176	Dynlt3	67117	dynein light chain Tctex-type 3	chrX:9654269-9662983	-	-1.05273	0.168593	-6.24423	4.25896e-10	2.9247e-08	Yes	OK	344.529	495.069	231.623	557.906	543.852	383.45	261.228	201.278	255.272	208.715
ENSMUSG00000032420	Nt5e	23959	5' nucleotidase, ecto	chr9:88327608-88372089	+	-1.30114	0.208663	-6.23559	4.50078e-10	3.075e-08	Yes	OK	851.352	1322.78	497.784	862.472	1375.94	1729.92	430.798	554.585	581.166	424.586
ENSMUSG00000039137	Whrn	73750	whirlin	chr4:63414909-63495991	-	1.50482	0.241533	6.2303	4.65541e-10	3.1645e-08	Yes	OK	82.2959	35.378	117.484	25.0557	45.8898	35.1884	137.489	141.323	89.7497	101.376
ENSMUSG00000001497	Pax9	18511	paired box 9	chr12:56695470-56712822	+	2.37669	0.381746	6.22584	4.78975e-10	3.23937e-08	Yes	OK	14.7795	1.44172	24.7829	1.67038	2.65478	0	36.6636	27.8363	19.127	15.5045
ENSMUSG00000062044	Lmtk3	381983	lemur tyrosine kinase 3	chr7:45783946-45804142	+	1.38846	0.223222	6.22008	4.96901e-10	3.34372e-08	Yes	OK	509.234	246.242	706.478	232.182	169.148	337.394	705.775	858.644	486.267	775.227
ENSMUSG00000045589	Frrs1l	230235	ferric-chelate reductase 1 like	chr4:56960135-56990391	-	-1.03216	0.166084	-6.21467	5.14317e-10	3.44093e-08	Yes	OK	782.518	1116.51	532.023	1206.01	1213.62	929.904	549.955	650.942	411.966	515.228
ENSMUSG00000038119	Cdon	57810	cell adhesion molecule-related/down-regulated by oncogenes	chr9:35452075-35507652	+	1.17343	0.188837	6.21401	5.16487e-10	3.44093e-08	Yes	OK	99.9272	56.07	132.82	55.1225	54.6127	58.4748	109.991	171.301	114.026	135.963
ENSMUSG00000033863	Klf9	16601	Kruppel-like factor 9	chr19:23141225-23166911	+	-1.4451	0.233079	-6.20007	5.64397e-10	3.74151e-08	Yes	OK	492.241	795.176	265.04	426.503	1036.88	922.142	284.143	286.928	239.823	249.265
ENSMUSG00000027499	Pkia	18767	protein kinase inhibitor, alpha	chr3:7366603-7445365	+	-0.990723	0.15985	-6.19784	5.72432e-10	3.77608e-08	Yes	OK	862.083	1218.69	594.631	1510.02	1216.65	929.387	577.452	610.258	588.523	602.292
ENSMUSG00000040860	Crocc	230872	ciliary rootlet coiled-coil, rootletin	chr4:141016636-141053661	-	1.6361	0.264023	6.1968	5.76213e-10	3.78226e-08	Yes	OK	152.59	60.1415	221.927	50.6681	44.3728	85.3835	270.394	177.724	139.039	300.55
ENSMUSG00000025531	Chm	12662	choroidermia (RAB escort protein 1)	chrX:113040591-113185515	-	-0.863623	0.139383	-6.19604	5.79018e-10	3.78226e-08	Yes	OK	347.377	472.697	253.387	524.499	436.143	457.449	265.811	220.549	289.848	237.339
ENSMUSG00000030704	Rab6a	19346	RAB6A, member RAS oncogene family	chr7:100607585-100641268	+	-0.862934	0.13929	-6.19523	5.81991e-10	3.78323e-08	Yes	OK	993.901	1352.86	724.678	1296.77	1577.32	1184.5	650.78	721.604	829.817	696.512
ENSMUSG00000033987	Dnah17	69926	dynein, axonemal, heavy chain 17	chr11:118021722-118129219	-	1.70433	0.27538	6.189	6.05455e-10	3.91674e-08	Yes	OK	36.4339	13.3988	53.7103	17.2606	9.48137	13.4544	68.7443	44.9664	52.2314	48.899
ENSMUSG00000023236	Scg5	20394	secretogranin V	chr2:113776312-113829091	-	-1.29679	0.209771	-6.18192	6.33264e-10	4.07694e-08	Yes	OK	298.339	464.583	173.657	608.017	468.001	317.73	137.489	207.702	192.006	157.431
ENSMUSG00000042662	Dusp15	252864	dual specificity phosphatase-like 15	chr2:152940994-152951582	-	0.936646	0.151604	6.17824	6.48222e-10	4.15327e-08	Yes	OK	148.757	95.8862	188.409	95.7683	98.227	93.6632	206.233	160.594	206.719	180.091
ENSMUSG00000089255	Snora78	100306952	small nucleolar RNA, H/ACA box 7	chr17:24719675-24719832	-	2.07012	0.335677	6.167	6.95976e-10	4.43801e-08	Yes	OK	45.2459	10.9437	70.9726	11.1359	7.20584	14.4893	64.1614	64.2377	33.8401	121.651
ENSMUSG00000048458	Fam212b	109050	family with sequence similarity 212, member B	chr3:105705457-105720842	+	-0.871855	0.141422	-6.1649	7.05261e-10	4.4759e-08	Yes	OK	1118.82	1519.83	818.061	1522.83	1585.66	1451	838.681	989.261	787.149	657.154
ENSMUSG00000031696	Vps35	65114	VPS35 retromer complex component	chr8:85260391-85299497	-	-0.594326	0.0964824	-6.15995	7.27691e-10	4.59646e-08	Yes	OK	794.705	989.004	648.981	998.329	983.408	985.274	655.363	599.552	673.123	667.888
ENSMUSG00000030788	Rnf141	67150	ring finger protein 141	chr7:110816534-110844381	-	-0.770946	0.125183	-6.15853	7.34212e-10	4.61588e-08	Yes	OK	320.431	418.923	246.563	438.753	420.594	397.422	288.726	224.832	250.858	221.834
ENSMUSG00000030654	Arl6ip1	54208	ADP-ribosylation factor-like 6 interacting protein 1	chr7:118118889-118129625	-	-0.614233	0.0998847	-6.14942	7.77684e-10	4.86634e-08	Yes	OK	1353.73	1699.13	1094.69	1719.38	1604.63	1773.39	994.501	1104.89	1143.94	1135.41
ENSMUSG00000028717	Tal1	21349	T cell acute lymphocytic leukemia 1	chr4:115056425-115071755	+	1.87428	0.305219	6.14076	8.21253e-10	5.11507e-08	Yes	OK	44.7794	14.4951	67.4926	22.8285	12.8947	7.76214	41.2466	64.2377	75.0367	89.4493
ENSMUSG00000109864	Eid3	66341	EP300 interacting inhibitor of differentiation 3	chr10:82866625-82867929	+	2.09101	0.341201	6.12837	8.8784e-10	5.5042e-08	Yes	OK	18.2817	4.24897	28.8062	2.22717	3.79255	6.72719	22.9148	34.2601	29.4261	28.6238
ENSMUSG00000042010	Acacb	100705	acetyl-Coenzyme A carboxylase beta	chr5:114165517-114250758	+	1.44499	0.235958	6.12393	9.12957e-10	5.63383e-08	Yes	OK	61.7152	27.6921	87.2325	22.8285	34.8915	25.3563	114.574	70.6615	89.7497	73.9448
ENSMUSG00000028020	Glrb	14658	glycine receptor, beta subunit	chr3:80843598-80913660	-	-1.10955	0.181224	-6.12256	9.20847e-10	5.65645e-08	Yes	OK	315.398	460.93	206.248	595.211	433.109	354.471	224.565	201.278	186.856	212.293
ENSMUSG00000037447	Arid5a	214855	AT rich interactive domain 5A (MRF1-like)	chr1:36307732-36324029	+	1.06581	0.174186	6.11879	9.42861e-10	5.74e-08	Yes	OK	148.175	89.0106	192.548	86.8596	79.2643	100.908	206.233	145.605	200.098	218.256
ENSMUSG00000025089	Gfra1	14585	glial cell line derived neurotrophic factor family receptor alpha 1	chr19:58235580-58455398	-	-0.746273	0.121979	-6.11806	9.47193e-10	5.74e-08	Yes	OK	1028.35	1350.15	787	1507.79	1284.16	1258.5	669.111	813.678	823.196	842.016
ENSMUSG00000022194	Pabpn1	54196	poly(A) binding protein, nuclear 1	chr14:54894142-54898927	+	0.999232	0.163325	6.11804	9.47308e-10	5.74e-08	Yes	OK	438.004	271.912	562.573	222.717	299.611	293.409	568.286	543.879	458.312	679.815
ENSMUSG00000023952	Gtpbp2	56055	GTP binding protein 2	chr17:46161031-46169370	+	0.779021	0.127544	6.10785	1.00981e-09	6.09116e-08	Yes	OK	318.427	223.762	389.426	213.252	229.828	228.207	407.883	329.754	384.747	435.32
ENSMUSG00000046295	Ankle1	234396	ankyrin repeat and LEM domain containing 1	chr8:71406011-71410542	+	1.65498	0.271295	6.10028	1.05881e-09	6.35806e-08	Yes	OK	61.3728	23.1475	90.0418	13.363	25.0308	31.0486	119.157	70.6615	71.3584	98.9906
ENSMUSG00000029309	Sparcl1	13602	SPARC-like 1	chr5:104079108-104114088	-	-1.19956	0.196783	-6.09583	1.08868e-09	6.50826e-08	Yes	OK	2163.25	3261.21	1339.78	3883.63	3646.92	2253.09	1186.99	1490.31	1102.74	1579.08
ENSMUSG00000019877	Serinc1	56442	serine incorporator 1	chr10:57515774-57532529	-	-0.858358	0.140938	-6.09034	1.12674e-09	6.70585e-08	Yes	OK	1536.56	2087.1	1123.66	2445.99	2091.59	1723.71	994.501	1139.15	1181.46	1179.54
ENSMUSG00000023007	Prpf40b	54614	pre-mRNA processing factor 40B	chr15:99295408-99317007	+	0.874566	0.14366	6.08774	1.14516e-09	6.78533e-08	Yes	OK	226.219	149.358	283.865	158.129	137.29	152.655	307.058	299.776	237.616	291.008
ENSMUSG00000028032	Papss1	23971	3'-phosphoadenosine 5'-phosphosulfate synthase 1	chr3:131564767-131643671	+	-0.780055	0.128236	-6.08296	1.17982e-09	6.95992e-08	Yes	OK	1227.88	1624.48	930.439	1814.59	1588.7	1470.15	925.757	912.175	1054.93	828.897
ENSMUSG00000097207	6030443J06Rik	320719	RIKEN cDNA 6030443J06 gene	chr5:22550412-22558171	+	1.2842	0.211261	6.07874	1.21132e-09	7.11438e-08	Yes	OK	286.614	149.717	389.286	163.697	91.4004	194.054	371.219	355.449	442.863	387.614
ENSMUSG00000024339	Tap2	21355	transporter 2, ATP-binding cassette, sub-family B (MDR/TAP)	chr17:34204478-34216321	+	1.45387	0.239274	6.07615	1.23099e-09	7.19834e-08	Yes	OK	267.527	122.3	376.448	161.47	72.4377	132.991	476.627	276.222	320.009	432.935
ENSMUSG00000025871	4833439L19Rik	97820	RIKEN cDNA 4833439L19 gene	chr13:54551217-54565382	-	-0.781497	0.128639	-6.07512	1.23892e-09	7.21319e-08	Yes	OK	609.409	809.037	459.688	881.403	792.264	753.445	412.466	501.054	514.958	410.274
ENSMUSG00000025409	Mbd6	110962	methyl-CpG binding domain protein 6	chr10:127281955-127288771	-	1.51748	0.249838	6.07384	1.24891e-09	7.23988e-08	Yes	OK	182.296	79.9798	259.034	71.2694	45.5106	123.159	229.148	297.635	274.399	234.954
ENSMUSG00000037697	Ddhd1	114874	DDHD domain containing 1	chr14:45593170-45658143	-	0.704752	0.116056	6.0725	1.25934e-09	7.26891e-08	Yes	OK	791.216	577.417	951.565	601.336	538.921	591.993	1012.83	813.678	960.028	1019.72
ENSMUSG00000031517	Gpm6a	234267	glycoprotein m6a	chr8:54779433-55060878	+	-1.10121	0.181642	-6.06255	1.33983e-09	7.68388e-08	Yes	OK	2167.96	3169.95	1416.47	4093.54	3108.37	2307.94	1581.12	1331.86	1487.49	1265.41
ENSMUSG00000006276	Eps15l1	13859	epidermal growth factor receptor pathway substrate 15-like 1	chr8:72340995-72421474	-	0.760515	0.125452	6.0622	1.34271e-09	7.68388e-08	Yes	OK	303.472	215.921	369.135	207.684	201.005	239.074	366.636	344.742	365.62	399.54
ENSMUSG00000028626	Col9a2	12840	collagen, type IX, alpha 2	chr4:121039565-121055325	+	1.71325	0.282731	6.05963	1.36432e-09	7.77432e-08	Yes	OK	154.255	57.0616	227.15	87.4164	47.0276	36.7408	197.067	139.182	222.903	349.449
ENSMUSG00000030607	Acan	11595	aggrecan	chr7:79053482-79115099	+	1.60152	0.26442	6.05672	1.38921e-09	7.88259e-08	Yes	OK	310.527	127.328	447.926	194.321	68.6451	119.019	279.56	477.5	538.498	496.146
ENSMUSG00000048271	Rbm33	381626	RNA binding motif protein 33	chr5:28317188-28419242	+	0.9305	0.15375	6.05201	1.43047e-09	8.08244e-08	Yes	OK	556.308	359.922	703.598	321.269	321.229	437.267	733.273	599.552	675.33	806.237
ENSMUSG00000032281	Acsbg1	94180	acyl-CoA synthetase bubblegum family member 1	chr9:54604996-54661885	-	-1.0295	0.170332	-6.0441	1.50244e-09	8.45341e-08	Yes	OK	592.44	847.267	401.32	628.062	904.144	1009.6	384.968	456.088	357.528	406.696
ENSMUSG00000038384	Setd1b	208043	SET domain containing 1B	chr5:123142192-123168630	+	1.36594	0.226443	6.03217	1.61769e-09	9.0638e-08	Yes	OK	282.368	137.568	390.968	110.245	94.4345	208.025	467.461	374.72	372.241	349.449
ENSMUSG00000066705	Fxyd6	59095	FXYD domain-containing ion transport regulator 6	chr9:45370184-45396159	+	0.784332	0.130441	6.01291	1.82219e-09	1.01671e-07	Yes	OK	469.447	327.544	575.874	288.975	350.052	343.604	586.618	638.095	582.638	496.146
ENSMUSG00000018899	Irf1	16362	interferon regulatory factor 1	chr11:53770013-53777324	+	1.56178	0.260816	5.98806	2.12353e-09	1.17993e-07	Yes	OK	306.609	127.367	441.04	153.118	88.7457	140.236	669.111	231.256	370.034	493.76
ENSMUSG00000019505	Ubb	22187	ubiquitin B	chr11:62551170-62553213	+	-0.65534	0.109677	-5.97517	2.29849e-09	1.27186e-07	Yes	OK	648.441	824.784	516.183	824.61	874.562	775.179	513.291	471.076	553.212	527.155
ENSMUSG00000078670	Fam174b	100038347	family with sequence similarity 174, member B	chr7:73740306-73776919	+	-1.03316	0.172946	-5.97392	2.31625e-09	1.27642e-07	Yes	OK	202.638	287.163	139.245	272.828	264.72	323.94	151.238	173.442	121.383	110.917
ENSMUSG00000055943	Emc7	73024	ER membrane protein complex subunit 7	chr2:112455024-112467436	+	-0.768741	0.128737	-5.9714	2.35225e-09	1.29094e-07	Yes	OK	301.895	399.52	228.676	410.356	428.558	359.646	219.982	216.267	243.501	234.954
ENSMUSG00000034855	Cxcl10	15945	chemokine (C-X-C motif) ligand 10	chr5:92346638-92348889	-	1.65666	0.277488	5.97022	2.36927e-09	1.29498e-07	Yes	OK	47.138	17.9691	69.0147	19.4877	16.308	18.1117	91.6591	32.1189	73.5654	78.7154
ENSMUSG00000077714	Snord17	100313519	small nucleolar RNA, C/D box 17	chr2:144265981-144266202	-	2.28636	0.383101	5.96804	2.40121e-09	1.3071e-07	Yes	OK	279.145	34.3082	462.773	47.3274	23.5138	32.0835	820.349	404.698	153.752	472.292
ENSMUSG00000103255	Pcdhac1	353236	protocadherin alpha subfamily C, 1	chr18:37090135-37187657	+	1.64612	0.276157	5.96083	2.50967e-09	1.36061e-07	Yes	OK	29.356	11.3703	42.8453	11.6926	9.48137	12.9369	45.8295	40.6839	41.9323	42.9357
ENSMUSG00000040724	Kcna2	16490	potassium voltage-gated channel, shaker-related subfamily, member 2	chr3:107101566-107115005	+	-0.613044	0.10295	-5.95477	2.60436e-09	1.40625e-07	Yes	OK	691.574	869.431	558.182	851.336	881.388	875.569	485.793	605.976	570.867	570.09
ENSMUSG00000010021	Kif19a	286942	kinesin family member 19A	chr11:114765388-114790575	+	1.64102	0.275617	5.95399	2.61682e-09	1.4073e-07	Yes	OK	53.7757	20.9247	78.4139	23.3853	14.0324	25.3563	100.825	47.1076	94.1637	71.5595
ENSMUSG00000074415	3110039I08Rik	73144	RIKEN cDNA 3110039I08 gene	chr9:41376525-41590019	+	0.933986	0.156931	5.95157	2.65581e-09	1.42256e-07	Yes	OK	236.659	154.956	297.936	181.514	142.6	140.753	252.063	274.081	318.538	347.063
ENSMUSG00000038058	Nod1	107607	nucleotide-binding oligomerization domain containing 1	chr6:54923941-54972612	-	1.52953	0.25728	5.945	2.76453e-09	1.47489e-07	Yes	OK	48.0964	20.4945	68.7979	22.2717	21.6175	17.5942	82.4932	42.8251	64.0019	85.8713
ENSMUSG00000032181	Scg3	20255	secretogranin III	chr9:75643365-75684056	-	-0.872063	0.146729	-5.94337	2.79228e-09	1.47757e-07	Yes	OK	594.93	809.134	434.277	803.452	965.204	658.747	462.878	404.698	431.829	437.705
ENSMUSG00000078920	Ifi47	15953	interferon gamma inducible protein 47	chr11:49087016-49096987	+	1.78514	0.300371	5.94311	2.79663e-09	1.47757e-07	Yes	OK	123.07	40.7506	184.809	40.6459	28.8234	52.7826	297.892	70.6615	175.086	195.596
ENSMUSG00000038241	Cep250	16328	centrosomal protein 250	chr2:155956557-155998900	+	0.93297	0.156993	5.94276	2.80265e-09	1.47757e-07	Yes	OK	378.469	243.769	479.493	246.102	196.454	288.752	508.708	456.088	420.058	533.118
ENSMUSG00000048154	Kmt2d	381022	lysine (K)-specific methyltransferase 2D	chr15:98831668-98871205	-	1.34961	0.227153	5.94142	2.82558e-09	1.48382e-07	Yes	OK	1752.83	865.938	2418	721.603	549.92	1326.29	2497.71	2537.39	2215.79	2421.09
ENSMUSG00000033498	Strc	140476	stereocilin	chr2:121363726-121380940	-	1.78039	0.300411	5.9265	3.09463e-09	1.61876e-07	Yes	OK	48.5754	16.9531	72.2922	13.9198	13.6532	23.2864	59.5784	38.5426	95.635	95.4126
ENSMUSG00000046808	Atp10d	231287	ATPase, class V, type 10D	chr5:72203328-72298771	+	1.61057	0.271924	5.92284	3.16421e-09	1.64871e-07	Yes	OK	69.3196	27.5674	100.634	38.4187	20.4798	23.8039	132.906	62.0964	122.854	84.6787
ENSMUSG00000048677	Tpcn2	233979	two pore segment channel 2	chr7:145253922-145284011	-	1.10746	0.187014	5.9218	3.18442e-09	1.65281e-07	Yes	OK	75.4322	44.6193	98.5419	43.4298	44.3728	46.0554	82.4932	104.922	102.992	103.761
ENSMUSG00000046574	Prr12	233210	proline rich 12	chr7:45027706-45052881	-	1.27227	0.21524	5.91095	3.40146e-09	1.75865e-07	Yes	OK	340.438	177.537	462.615	150.891	124.016	257.703	449.13	539.597	390.632	471.1
ENSMUSG00000025427	Rnf165	225743	ring finger protein 165	chr18:77456109-77565136	-	1.33986	0.22673	5.90951	3.43136e-09	1.76728e-07	Yes	OK	141.547	69.4544	195.616	47.3274	62.1978	98.8379	233.731	205.561	180.971	162.201
ENSMUSG00000101970	1810026B05Rik	69170	RIKEN cDNA 1810026B05 gene	chr7:73539797-73558395	-	1.06471	0.180236	5.9073	3.4777e-09	1.78429e-07	Yes	OK	187.883	110.588	245.855	90.2004	103.916	137.649	284.143	267.657	222.903	208.715
ENSMUSG00000049103	Ccr2	12772	chemokine (C-C motif) receptor 2	chr9:124102182-124109140	+	1.9472	0.329671	5.9065	3.49446e-09	1.78604e-07	Yes	OK	37.4669	10.3915	57.7735	15.0334	6.82659	9.31457	68.7443	27.8363	86.8071	47.7063
ENSMUSG00000033760	Rbm4b	66704	RNA binding motif protein 4B	chr19:4756524-4765941	+	0.846268	0.143701	5.88908	3.88342e-09	1.97729e-07	Yes	OK	257.218	176.675	317.625	193.207	157.77	179.047	284.143	284.787	360.47	341.1
ENSMUSG00000016206	H2-M3	14991	histocompatibility 2, M region locus 3	chr17:37270233-37274485	+	1.75498	0.298661	5.87616	4.19893e-09	2.12985e-07	Yes	OK	72.2625	24.337	108.207	30.6236	18.5835	23.8039	174.152	44.9664	95.635	118.073
ENSMUSG00000036054	Sugp2	234373	SURP and G patch domain containing 2	chr8:70234225-70263105	+	0.602334	0.102524	5.87505	4.22704e-09	2.13601e-07	Yes	OK	475.556	364.499	558.849	352.45	364.843	376.205	586.618	520.325	558.361	570.09
ENSMUSG00000032308	Ulk3	71742	unc-51-like kinase 3	chr9:57589451-57596233	+	1.3685	0.233154	5.8695	4.37117e-09	2.20054e-07	Yes	OK	76.6968	37.4673	106.119	34.5211	27.6856	50.1952	114.574	83.509	105.934	120.458
ENSMUSG00000010825	Grid2ip	170935	glutamate receptor, ionotropic, delta 2 (Grid2) interacting protein 1	chr5:143363907-143391798	+	1.12091	0.191654	5.8486	4.95741e-09	2.47793e-07	Yes	OK	91.6376	51.9143	121.43	46.2138	62.9563	46.5728	132.906	124.193	117.705	110.917
ENSMUSG00000019899	Lama2	16773	laminin, alpha 2	chr10:26981284-27616942	-	-1.60296	0.274079	-5.84854	4.95918e-09	2.47793e-07	Yes	OK	93.7933	161.186	43.2492	247.216	128.188	108.152	32.0807	49.2489	46.3462	45.321
ENSMUSG00000026147	Col9a1	12839	collagen, type IX, alpha 1	chr1:24195202-24252738	+	1.65296	0.283106	5.83867	5.2619e-09	2.61731e-07	Yes	OK	123.869	48.3382	180.517	60.1336	32.6159	52.2651	132.906	109.204	298.675	181.284
ENSMUSG00000024193	Phf1	21652	PHD finger protein 1	chr17:26933126-26937908	+	1.17795	0.201767	5.83819	5.27723e-09	2.61731e-07	Yes	OK	64.4963	36.112	85.7845	39.5323	34.1329	34.6709	82.4932	81.3678	83.8645	95.4126
ENSMUSG00000023036	Pcdhgc4	93707	protocadherin gamma subfamily C, 4	chr18:37815078-37841872	+	0.923803	0.158395	5.83228	5.4676e-09	2.69766e-07	Yes	OK	178.392	116.13	225.089	109.688	104.674	134.026	201.65	265.516	228.053	205.137
ENSMUSG00000029636	Wasf3	245880	WAS protein family, member 3	chr5:146385005-146471125	+	0.754198	0.129335	5.83134	5.49827e-09	2.69766e-07	Yes	OK	520.714	369.688	633.983	379.176	394.046	335.842	614.116	680.92	544.384	696.512
ENSMUSG00000028756	Pink1	68943	PTEN induced putative kinase 1	chr4:138313409-138326296	-	-0.913049	0.156577	-5.8313	5.49967e-09	2.69766e-07	Yes	OK	459.929	634.262	329.179	764.476	632.218	506.092	334.556	334.036	298.675	349.449
ENSMUSG00000024170	Telo2	71718	telomere maintenance 2	chr17:25099568-25115905	-	1.05581	0.181147	5.82848	5.59361e-09	2.73372e-07	Yes	OK	206.235	122.224	269.244	91.8708	137.67	137.131	288.726	314.765	236.145	237.339
ENSMUSG00000040520	Manea	242362	mannosidase, endo-alpha	chr4:26324505-26346652	-	-0.819064	0.140802	-5.81713	5.9867e-09	2.91519e-07	Yes	OK	193.861	261.362	143.236	270.601	270.788	242.696	128.323	154.17	154.487	135.963
ENSMUSG00000030583	Sipa1l3	74206	signal-induced proliferation-associated 1 like 3	chr7:29320377-29505460	-	0.86811	0.149442	5.80902	6.28389e-09	3.04883e-07	Yes	OK	278.191	185.117	347.996	163.14	173.319	218.892	352.888	396.132	328.102	314.862
ENSMUSG00000021359	Tfap2a	21418	transcription factor AP-2, alpha	chr13:40715302-40734920	-	1.70724	0.293946	5.80802	6.32147e-09	3.05583e-07	Yes	OK	35.1603	12.4493	52.1936	7.2383	12.5154	17.5942	64.1614	42.8251	58.8523	42.9357
ENSMUSG00000020029	Nudt4	71207	nudix (nucleoside diphosphate linked moiety X)-type motif 4	chr10:95547006-95564167	-	-0.624798	0.107586	-5.80743	6.34396e-09	3.05583e-07	Yes	OK	432.833	545.821	348.091	529.51	569.262	538.693	334.556	334.036	361.206	362.568
ENSMUSG00000040997	Abhd4	105501	abhydrolase domain containing 4	chr14:54254128-54269169	+	-0.915198	0.158602	-5.7704	7.90853e-09	3.79581e-07	Yes	OK	640.8	889.895	453.978	1094.1	786.954	788.633	398.717	428.251	533.349	455.595
ENSMUSG00000020812	1810032O08Rik	66293	RIKEN cDNA 1810032O08 gene	chr11:116671659-116675798	+	1.65953	0.28769	5.76846	7.99974e-09	3.82587e-07	Yes	OK	33.4755	12.0502	49.5445	8.35189	11.7569	16.0418	64.1614	49.2489	38.254	46.5136
ENSMUSG00000030279	C2cd5	74741	C2 calcium-dependent domain containing 5	chr6:143010919-143100152	-	0.669804	0.116194	5.76455	8.1875e-09	3.90173e-07	Yes	OK	342.264	251.346	410.453	244.989	244.619	264.43	458.295	413.263	386.218	384.036
ENSMUSG00000030286	Emc3	66087	ER membrane protein complex subunit 3	chr6:113514886-113531638	-	-0.688236	0.11947	-5.76076	8.3736e-09	3.97627e-07	Yes	OK	316.809	408.12	248.326	380.846	414.526	428.988	229.148	263.375	257.479	243.302
ENSMUSG00000043716	Rpl7	19989	ribosomal protein L7	chr1:16101295-16104433	-	-0.759741	0.131984	-5.75633	8.5964e-09	4.06764e-07	Yes	OK	570.112	749.934	435.247	660.913	871.149	717.739	430.798	423.969	466.404	419.815
ENSMUSG00000028194	Ddah1	69219	dimethylarginine dimethylaminohydrolase 1	chr3:145758691-145894277	+	-0.679352	0.118094	-5.75265	8.78549e-09	4.14248e-07	Yes	OK	1243.17	1592.83	980.927	1780.62	1557.22	1440.65	902.842	1072.77	997.546	950.548
ENSMUSG00000021431	Snrnp48	67797	small nuclear ribonucleoprotein 48 (U11/U12)	chr13:38204938-38227663	+	0.951767	0.165523	5.75006	8.92104e-09	4.19164e-07	Yes	OK	214.444	135.997	273.279	122.494	133.877	151.62	302.475	226.973	236.88	326.788
ENSMUSG00000037225	Fgf2	14173	fibroblast growth factor 2	chr3:37348652-37404830	+	-1.45589	0.253294	-5.74781	9.04085e-09	4.23308e-07	Yes	OK	112.48	186.97	56.613	131.403	171.802	257.703	27.4977	68.5202	68.4158	62.0182
ENSMUSG00000003623	Crot	74114	carnitine O-octanoyltransferase	chr5:8966047-8997146	-	-0.856253	0.149038	-5.7452	9.18103e-09	4.28373e-07	Yes	OK	373.384	504.287	275.206	472.16	596.189	444.512	311.641	250.527	290.583	248.073
ENSMUSG00000056158	Car10	72605	carbonic anhydrase 10	chr11:93099289-93601751	+	-1.34696	0.234516	-5.74357	9.27034e-09	4.31039e-07	Yes	OK	132.622	208.486	75.7243	257.795	205.177	162.487	68.7443	107.063	50.7601	76.3301
ENSMUSG00000000861	Bcl11a	14025	B cell CLL/lymphoma 11A (zinc finger protein)	chr11:24078055-24173558	+	1.83178	0.319076	5.74088	9.41841e-09	4.36408e-07	Yes	OK	39.3126	11.4838	60.1841	11.6926	17.0665	5.69224	91.6591	53.5314	57.381	38.165
ENSMUSG00000028809	Srrm1	51796	serine/arginine repetitive matrix 1	chr4:135320483-135353214	-	0.940334	0.163844	5.7392	9.51234e-09	4.3924e-07	Yes	OK	617.024	395.988	782.801	295.657	391.391	500.917	788.268	747.299	808.483	787.154
ENSMUSG00000066037	Hnrnpr	74326	heterogeneous nuclear ribonucleoprotein R	chr4:136310941-136345979	+	0.600451	0.104728	5.73342	9.84226e-09	4.51362e-07	Yes	OK	835.559	641.888	980.812	594.654	645.871	685.138	1017.42	905.752	1023.29	976.787
ENSMUSG00000020462	Cfap36	216618	cilia and flagella associated protein 36	chr11:29221535-29247272	-	-0.829611	0.145039	-5.7199	1.06588e-08	4.87001e-07	Yes	OK	261.296	350.946	194.057	385.857	362.188	304.793	183.318	216.267	175.086	201.559
ENSMUSG00000049630	C1ql3	227580	C1q-like 3	chr2:13001886-13010864	-	-1.11674	0.195255	-5.71937	1.06921e-08	4.87001e-07	Yes	OK	115.481	168.192	75.9481	201.559	142.6	160.418	87.0761	79.2265	64.7375	72.7521
ENSMUSG00000022186	Oxct1	67041	3-oxoacid CoA transferase 1	chr15:4026427-4155344	+	-0.683223	0.119513	-5.71671	1.08607e-08	4.93004e-07	Yes	OK	768.242	982.489	607.557	1079.06	973.168	895.234	655.363	543.879	583.373	647.613
ENSMUSG00000036446	Lum	17022	lumican	chr10:97565500-97572703	+	-2.08213	0.36434	-5.7148	1.09833e-08	4.96882e-07	Yes	OK	28.8116	56.8696	7.76814	96.3251	43.2351	31.0486	13.7489	4.28251	5.88523	7.15595
ENSMUSG00000029518	Rab35	77407	RAB35, member RAS oncogene family	chr5:115631986-115647158	+	-0.686026	0.120091	-5.71254	1.11299e-08	5.01821e-07	Yes	OK	316.275	409.501	246.354	413.14	412.25	403.114	201.65	274.081	260.421	249.265
ENSMUSG00000020019	Ntn4	57764	netrin 4	chr10:93641048-93745972	+	-0.98567	0.172604	-5.71058	1.12593e-08	5.05951e-07	Yes	OK	153.25	219.02	103.923	226.615	214.658	215.788	82.4932	124.193	124.325	84.6787
ENSMUSG00000032525	Nktr	18087	natural killer tumor recognition sequence	chr9:121719180-121756841	+	0.898122	0.157303	5.7095	1.13308e-08	5.0746e-07	Yes	OK	1209.73	797.452	1518.94	762.249	706.931	923.177	1374.89	1231.22	1714.07	1755.59
ENSMUSG00000034997	Htr2a	15558	5-hydroxytryptamine (serotonin) receptor 2A	chr14:74640839-74706859	+	-1.65846	0.290797	-5.70318	1.17595e-08	5.24906e-07	Yes	OK	39.5224	68.6426	17.6822	46.2138	80.0228	79.6913	18.3318	17.1301	16.1844	19.0825
ENSMUSG00000048332	Lhfp	108927	lipoma HMGIC fusion partner	chr3:53041546-53261679	+	-1.34018	0.235155	-5.69913	1.20417e-08	5.35718e-07	Yes	OK	116.873	186.684	64.5151	167.595	223.76	168.697	27.4977	104.922	58.8523	66.7888
ENSMUSG00000015533	Itga2	16398	integrin alpha 2	chr13:114835911-114932041	-	1.64334	0.288877	5.68873	1.27989e-08	5.67518e-07	Yes	OK	35.9611	14.2511	52.2436	13.9198	11.7569	17.0767	45.8295	34.2601	72.8297	56.0549
ENSMUSG00000038256	Bcl9	77578	B cell CLL/lymphoma 9	chr3:97203661-97227364	-	1.11427	0.19591	5.68765	1.28803e-08	5.69241e-07	Yes	OK	215.84	124.995	283.973	97.4387	103.157	174.389	270.394	286.928	293.526	285.045
ENSMUSG00000024299	Adamts10	224697	a disintegrin-like and metallopeptidase (reprolysin type) with thrombospondin type 1 motif, 10	chr17:33524084-33553782	+	0.855487	0.15058	5.68126	1.33703e-08	5.88954e-07	Yes	OK	324.125	219.789	402.376	228.285	187.352	243.731	366.636	368.296	389.161	485.412
ENSMUSG00000028456	Unc13b	22249	unc-13 homolog B (C. elegans)	chr4:43058952-43264873	+	0.978647	0.17245	5.67495	1.38732e-08	6.09102e-07	Yes	OK	161.036	102.061	205.267	126.949	91.7797	87.4535	178.735	216.267	203.04	223.027
ENSMUSG00000020961	Ston2	108800	stonin 2	chr12:91633008-91786436	-	1.57131	0.277476	5.66287	1.48858e-08	6.49549e-07	Yes	OK	150.711	61.4496	217.658	45.657	43.9936	94.6981	242.897	115.628	235.409	276.697
ENSMUSG00000053877	Srcap	100043597	Snf2-related CREBBP activator protein	chr7:127511982-127561219	+	1.0308	0.182029	5.66281	1.48915e-08	6.49549e-07	Yes	OK	1365.32	829.267	1767.36	704.343	643.975	1139.48	1860.68	1807.22	1656.69	1744.86
ENSMUSG00000054013	Tmem179	104885	transmembrane protein 179	chr12:112500183-112511160	-	-1.22598	0.216561	-5.66116	1.50354e-08	6.537e-07	Yes	OK	257.02	390.341	157.03	475.501	286.717	408.806	151.238	220.549	119.176	137.156
ENSMUSG00000040940	Arhgef1	16801	Rho guanine nucleotide exchange factor (GEF) 1	chr7:24904345-24926591	+	1.12746	0.199342	5.65591	1.55022e-08	6.71812e-07	Yes	OK	358.048	204.671	473.08	175.39	152.46	286.164	494.959	438.958	419.323	539.081
ENSMUSG00000032621	Srek1	218543	splicing regulatory glutamine/lysine-rich protein 1	chr13:103741614-103764582	-	0.697098	0.123278	5.6547	1.5612e-08	6.74388e-07	Yes	OK	645.987	473.868	775.076	489.977	408.458	523.168	779.102	710.897	804.069	806.237
ENSMUSG00000031617	Tmem184c	234463	transmembrane protein 184C	chr8:77595977-77610653	-	-0.960005	0.170094	-5.64398	1.66165e-08	7.1547e-07	Yes	OK	253.038	356.836	175.189	440.98	342.846	286.682	160.403	171.301	185.385	183.669
ENSMUSG00000001521	Tulp3	22158	tubby-like protein 3	chr6:128321160-128355851	-	1.25751	0.222869	5.64239	1.67704e-08	7.19784e-07	Yes	OK	174.842	91.5499	237.311	58.4632	82.6776	133.509	233.731	246.245	239.087	230.183
ENSMUSG00000061436	Hipk2	15258	homeodomain interacting protein kinase 2	chr6:38697839-38876190	-	0.85271	0.15116	5.64112	1.68949e-08	7.22812e-07	Yes	OK	1166.57	785.686	1452.23	861.358	595.809	899.891	1535.29	1417.51	1484.55	1371.56
ENSMUSG00000049624	Slc17a5	235504	solute carrier family 17 (anion/sugar transporter), member 5	chr9:78536486-78588045	-	-1.00469	0.178357	-5.63304	1.77055e-08	7.54971e-07	Yes	OK	110.717	155.298	77.2809	152.561	144.117	169.215	87.0761	85.6503	68.4158	67.9815
ENSMUSG00000063382	Bcl9l	80288	B cell CLL/lymphoma 9-like	chr9:44499135-44510412	+	1.2551	0.22284	5.63228	1.77839e-08	7.54971e-07	Yes	OK	246.296	129.79	333.675	119.71	80.7813	188.879	311.641	319.047	345.022	358.99
ENSMUSG00000065822	Snord15a	449630	small nucleolar RNA, C/D box 15A	chr7:99482784-99482932	-	2.11693	0.375877	5.63197	1.78158e-08	7.54971e-07	Yes	OK	25.7546	3.9302	42.1229	3.34076	3.79255	4.65728	87.0761	25.6951	13.9774	41.743
ENSMUSG00000043439	E130012A19Rik	103551	RIKEN cDNA E130012A19 gene	chr11:97627386-97629716	-	1.58961	0.282575	5.62545	1.85026e-08	7.81603e-07	Yes	OK	38.5814	15.2685	56.066	8.35189	19.342	18.1117	50.4125	66.379	57.381	50.0916
ENSMUSG00000025986	Slc39a10	227059	solute carrier family 39 (zinc transporter), member 10	chr1:46807543-46853509	-	-0.623296	0.110876	-5.62157	1.89233e-08	7.96863e-07	Yes	OK	545.34	684.903	440.668	730.512	671.66	652.537	417.049	483.924	415.644	446.054
ENSMUSG00000068606	Gm4841	225594	predicted gene 4841	chr18:60268300-60273267	-	2.06897	0.368084	5.62094	1.89923e-08	7.97258e-07	Yes	OK	20.1063	3.6575	32.4428	4.45434	3.41329	3.10486	59.5784	8.56503	29.4261	32.2018
ENSMUSG00000037624	Kcnk2	16526	potassium channel, subfamily K, member 2	chr1:189207929-189343353	-	-1.09578	0.194966	-5.62035	1.90567e-08	7.97464e-07	Yes	OK	353.964	521.731	228.138	482.182	512.753	570.259	142.072	336.177	233.938	200.366
ENSMUSG00000036751	Cox6b1	110323	cytochrome c oxidase, subunit VIb polypeptide 1	chr7:30616973-30626151	-	-0.888094	0.158266	-5.61139	2.0071e-08	8.37292e-07	Yes	OK	471.662	651.102	337.083	678.173	745.236	529.895	256.645	379.002	365.62	347.063
ENSMUSG00000020142	Slc1a4	55963	solute carrier family 1 (glutamate/neutral amino acid transporter), member 4	chr11:20302179-20332713	-	-0.786	0.140252	-5.60421	2.09211e-08	8.69176e-07	Yes	OK	337.356	449.015	253.611	441.536	413.388	492.12	215.399	289.07	227.317	282.66
ENSMUSG00000055430	Nap1l5	58243	nucleosome assembly protein 1-like 5	chr6:58905232-58907126	-	-0.864588	0.154296	-5.60343	2.10146e-08	8.69176e-07	Yes	OK	802.678	1094.06	584.145	1047.33	1264.06	970.785	513.291	612.399	502.451	708.439
ENSMUSG00000051817	Sox12	20667	SRY (sex determining region Y)-box 12	chr2:152393611-152398046	-	0.873078	0.155815	5.60331	2.103e-08	8.69176e-07	Yes	OK	202.537	134.941	253.235	126.949	133.498	144.376	219.982	323.33	234.674	234.954
ENSMUSG00000027822	Slc33a1	11416	solute carrier family 33 (acetyl-CoA transporter), member 1	chr3:63942323-63964733	-	-0.85154	0.152029	-5.60118	2.12897e-08	8.77202e-07	Yes	OK	197.697	270.706	142.94	302.895	242.723	266.5	114.574	160.594	152.28	144.312
ENSMUSG00000026585	Kifap3	16579	kinesin-associated protein 3	chr1:163779582-163917107	+	-0.806402	0.144128	-5.59505	2.20554e-08	9.05964e-07	Yes	OK	578.025	772.988	431.804	942.65	689.106	687.208	417.049	421.828	430.357	457.981
ENSMUSG00000042308	Setd1a	233904	SET domain containing 1A	chr7:127777388-127800119	+	0.997219	0.178269	5.59391	2.22011e-08	9.07691e-07	Yes	OK	305.904	189.959	392.862	162.027	157.391	250.458	357.47	453.946	370.034	389.999
ENSMUSG00000037736	Limch1	77569	LIM and calponin homology domains 1	chr5:66968415-67057159	+	-0.848273	0.151649	-5.59366	2.2233e-08	9.07691e-07	Yes	OK	626.935	850.88	458.976	918.708	831.327	802.605	453.713	417.545	578.224	386.421
ENSMUSG00000027963	Extl2	58193	exostoses (multiple)-like 2	chr3:116007448-116029016	+	-0.84155	0.150758	-5.58213	2.37591e-08	9.67044e-07	Yes	OK	312.385	425.538	227.521	498.886	411.871	365.856	192.484	224.832	243.501	249.265
ENSMUSG00000037347	Chst7	60322	carbohydrate (N-acetylglucosamino) sulfotransferase 7	chrX:20059569-20097520	+	-1.52748	0.273746	-5.57993	2.40617e-08	9.75756e-07	Yes	OK	58.1688	98.5396	27.8907	113.586	82.6776	99.3554	9.16591	53.5314	25.0122	23.8532
ENSMUSG00000003161	Sri	109552	sorcin	chr5:8056541-8069314	+	-0.767545	0.137565	-5.57952	2.41188e-08	9.75756e-07	Yes	OK	338.896	445.777	258.736	467.149	469.138	401.044	270.394	267.657	281.02	215.871
ENSMUSG00000007415	Gatad1	67210	GATA zinc finger domain containing 1	chr5:3639960-3647936	-	-0.867522	0.155554	-5.57698	2.44724e-08	9.8708e-07	Yes	OK	243.266	328.345	179.457	325.724	380.393	278.92	210.816	164.877	169.2	172.935
ENSMUSG00000041415	Dicer1	192119	dicer 1, ribonuclease type III	chr12:104687741-104751952	-	0.623794	0.111908	5.57418	2.48703e-08	1.00012e-06	Yes	OK	685.141	522.26	807.302	481.626	504.03	581.126	751.605	822.243	846.737	808.622
ENSMUSG00000014786	Slc9a5	277973	solute carrier family 9 (sodium/hydrogen exchanger), member 5	chr8:105348257-105369881	+	1.29422	0.232339	5.5704	2.54151e-08	1.01896e-06	Yes	OK	107.669	53.3629	148.399	34.5211	68.6451	56.9224	187.901	145.605	116.969	143.119
ENSMUSG00000061273	Mmgt1	236792	membrane magnesium transporter 1	chrX:56585511-56597919	-	-0.66816	0.120103	-5.56323	2.64826e-08	1.05859e-06	Yes	OK	478.187	613.534	376.677	594.098	619.323	627.181	357.47	344.742	434.771	369.724
ENSMUSG00000018378	2210416O15Rik	70393	RIKEN cDNA 2210416O15 gene	chr11:88098057-88100107	+	0.748038	0.134784	5.54992	2.858e-08	1.13903e-06	Yes	OK	370.484	260.654	452.857	232.182	267.754	282.024	522.457	475.359	410.495	403.118
ENSMUSG00000018378	Cuedc1	103841	CUE domain containing 1	chr11:88099145-88194140	+	0.748038	0.134784	5.54992	2.858e-08	1.13903e-06	Yes	OK	370.484	260.654	452.857	232.182	267.754	282.024	522.457	475.359	410.495	403.118
ENSMUSG00000027881	Prpf38b	66921	PRP38 pre-mRNA processing factor 38 (yeast) domain containing B	chr3:108902806-108911704	-	0.651927	0.117615	5.54288	2.97539e-08	1.1823e-06	Yes	OK	323.5	240.198	385.976	246.659	235.897	238.039	412.466	411.121	374.448	345.871
ENSMUSG00000027878	Notch2	18129	notch 2	chr3:98013537-98150367	+	0.909696	0.164255	5.53832	3.05386e-08	1.20989e-06	Yes	OK	229.926	152.25	288.183	155.902	135.773	165.075	256.645	231.256	342.815	322.018
ENSMUSG00000028358	Zfp618	72701	zinc finger protein 618	chr4:62965573-63134030	+	0.873188	0.157801	5.53348	3.13936e-08	1.23708e-06	Yes	OK	184.193	121.239	231.408	139.198	108.088	116.432	279.56	203.419	233.938	208.715
ENSMUSG00000027012	Dync1i2	13427	dynein cytoplasmic 1 intermediate chain 2	chr2:71211945-71263302	+	-0.670448	0.121164	-5.53339	3.14097e-08	1.23708e-06	Yes	OK	646.778	831.207	508.456	850.222	863.563	779.836	449.13	475.359	583.373	525.962
ENSMUSG00000038323	1700066M21Rik	73467	RIKEN cDNA 1700066M21 gene	chr1:57377619-57385422	+	-1.05697	0.191154	-5.52944	3.2126e-08	1.26158e-06	Yes	OK	153.311	222.368	101.519	278.953	214.279	173.872	100.825	98.4978	102.992	103.761
ENSMUSG00000061589	Dot1l	208266	DOT1-like, histone H3 methyltransferase (S. cerevisiae)	chr10:80755205-80794347	+	1.25889	0.227816	5.52592	3.27761e-08	1.28335e-06	Yes	OK	639.945	333.722	869.612	246.102	235.517	519.546	834.098	987.119	862.922	794.31
ENSMUSG00000035835	Plppr3	216152	phospholipid phosphatase related 3	chr10:79864780-79874634	-	1.39665	0.252826	5.52415	3.31077e-08	1.29255e-06	Yes	OK	77.0862	36.6942	107.38	26.1692	35.2707	48.6427	87.0761	96.3566	93.428	152.66
ENSMUSG00000040321	Zfp770	228491	zinc finger protein 770	chr2:114193460-114201432	-	-0.746475	0.135197	-5.52137	3.36362e-08	1.30937e-06	Yes	OK	265.44	350.956	201.302	352.45	348.535	351.884	183.318	192.713	238.352	190.825
ENSMUSG00000037826	Ppm1k	243382	protein phosphatase 1K (PP2C domain containing)	chr6:57506501-57535426	-	-0.690517	0.125101	-5.51966	3.39651e-08	1.31834e-06	Yes	OK	249.216	321.741	194.822	335.189	304.542	325.492	178.735	207.702	200.833	192.018
ENSMUSG00000037110	Ralgapa2	241694	Ral GTPase activating protein, alpha subunit 2 (catalytic)	chr2:146241298-146512004	-	0.671522	0.121725	5.51673	3.45371e-08	1.33667e-06	Yes	OK	326.499	243.909	388.442	225.501	238.172	268.053	352.888	387.567	399.46	413.852
ENSMUSG00000055053	Nfic	18029	nuclear factor I/C	chr10:81396190-81427173	-	0.911779	0.165316	5.51538	3.48023e-08	1.34305e-06	Yes	OK	398.196	259.843	501.96	226.615	216.555	336.359	476.627	535.314	525.992	469.907
ENSMUSG00000024507	Hsd17b4	15488	hydroxysteroid (17-beta) dehydrogenase 4	chr18:50128200-50196270	+	-0.647893	0.117592	-5.50966	3.59529e-08	1.38346e-06	Yes	OK	635.956	807.658	507.179	900.334	771.784	750.858	472.044	537.455	532.613	486.604
ENSMUSG00000031633	Slc25a4	11739	solute carrier family 25 (mitochondrial carrier, adenine nucleotide translocator), member 4	chr8:46207340-46211009	-	-0.573569	0.104264	-5.50113	3.77369e-08	1.44795e-06	Yes	OK	1659.18	2053.3	1363.59	1986.08	2140.14	2033.68	1209.9	1488.17	1410.98	1345.32
ENSMUSG00000098678	Mroh6	223645	maestro heat-like repeat family member 6	chr15:75882933-75888723	-	1.90348	0.346315	5.49638	3.87673e-08	1.48324e-06	Yes	OK	41.1686	10.671	64.0419	12.2494	6.82659	12.9369	96.242	17.1301	58.1166	84.6787
ENSMUSG00000030281	Il17rc	171095	interleukin 17 receptor C	chr6:113471454-113483140	+	1.48138	0.269679	5.49314	3.9484e-08	1.50635e-06	Yes	OK	36.0133	14.9928	51.7788	12.2494	16.6872	16.0418	73.3273	38.5426	46.3462	48.899
ENSMUSG00000041235	Chd7	320790	chromodomain helicase DNA binding protein 7	chr4:8690405-8868449	+	0.711436	0.129563	5.49104	3.99577e-08	1.5201e-06	Yes	OK	1667.09	1210.42	2009.6	1216.03	1028.92	1386.32	2094.41	1845.76	1959.78	2138.44
ENSMUSG00000059326	Csf2ra	12982	colony stimulating factor 2 receptor, alpha, low-affinity (granulocyte-macrophage)	chr19:61224401-61228418	-	1.0956	0.199578	5.48958	4.02881e-08	1.52832e-06	Yes	OK	94.6093	55.8687	123.665	52.8953	51.5787	63.1321	100.825	126.334	108.877	158.623
ENSMUSG00000031231	Cox7b	66142	cytochrome c oxidase subunit VIIb	chrX:106015699-106022450	+	-0.926333	0.168964	-5.48241	4.1957e-08	1.58714e-06	Yes	OK	196.609	274.246	138.381	260.579	330.331	231.829	132.906	126.334	146.395	147.89
ENSMUSG00000061028	Clasrp	53609	CLK4-associating serine/arginine rich protein	chr7:19581037-19604486	-	0.953157	0.173939	5.47984	4.25706e-08	1.60289e-06	Yes	OK	374.188	237.908	476.397	208.797	216.175	288.752	467.461	445.381	392.839	599.907
ENSMUSG00000031447	Lamp1	16783	lysosomal-associated membrane protein 1	chr8:13159160-13175338	+	-0.937753	0.171138	-5.47953	4.26462e-08	1.60289e-06	Yes	OK	1417.49	1980.49	995.244	2554.56	1744.95	1641.95	820.349	1027.8	1097.6	1035.23
ENSMUSG00000050751	Pgbd5	209966	piggyBac transposable element derived 5	chr8:124369048-124433936	-	-1.33602	0.243837	-5.47917	4.27325e-08	1.60289e-06	Yes	OK	103.66	165.118	57.5668	133.63	215.796	145.928	41.2466	64.2377	44.8749	79.9081
ENSMUSG00000007653	Gabrb2	14401	gamma-aminobutyric acid (GABA) A receptor, subunit beta 2	chr11:42419756-42632591	+	-1.44037	0.262993	-5.47684	4.32995e-08	1.61825e-06	Yes	OK	195.184	319.436	101.994	461.581	312.506	184.221	96.242	94.2153	77.9793	139.541
ENSMUSG00000067629	Syngap1	240057	synaptic Ras GTPase activating protein 1 homolog (rat)	chr17:26941451-26970645	+	0.932663	0.170303	5.47649	4.33838e-08	1.61825e-06	Yes	OK	368.854	237.418	467.432	227.728	181.284	303.241	467.461	458.229	434.771	509.265
ENSMUSG00000042249	Grk3	320129	G protein-coupled receptor kinase 3	chr5:112910477-113015538	-	1.48607	0.271387	5.47585	4.35407e-08	1.61959e-06	Yes	OK	189.219	82.5265	269.238	47.3274	133.498	66.7544	187.901	263.375	271.456	354.219
ENSMUSG00000058006	Mdn1	100019	midasin AAA ATPase 1	chr4:32657118-32775217	+	0.678697	0.123994	5.47361	4.40955e-08	1.63568e-06	Yes	OK	1082.67	798.588	1295.73	674.833	839.67	881.262	1301.56	1344.71	1202.06	1334.58
ENSMUSG00000030519	Apba2	11784	amyloid beta (A4) precursor protein-binding, family A, member 2	chr7:64502137-64753876	+	-0.585742	0.10703	-5.47271	4.43196e-08	1.63946e-06	Yes	OK	585.631	729.961	477.383	737.193	753.58	699.11	435.381	466.794	482.589	524.769
ENSMUSG00000025780	Itih5	209378	inter-alpha (globulin) inhibitor H5	chr2:10153542-10256529	+	-1.82879	0.334495	-5.46731	4.56912e-08	1.68554e-06	Yes	OK	495.901	920.042	177.795	1410.91	664.075	685.138	91.6591	222.691	215.547	181.284
ENSMUSG00000024413	Npc1	18145	Niemann-Pick type C1	chr18:12189693-12236386	-	-1.08373	0.198297	-5.46518	4.62449e-08	1.70128e-06	Yes	OK	937.843	1372.05	612.189	1953.23	1086.57	1076.35	577.452	567.433	640.754	663.118
ENSMUSG00000063952	Brpf3	268936	bromodomain and PHD finger containing, 3	chr17:28801125-28838789	+	1.02484	0.1878	5.45708	4.84015e-08	1.77574e-06	Yes	OK	191.896	115.436	249.24	92.4276	102.778	151.103	284.143	265.516	220.696	226.605
ENSMUSG00000055491	Pprc1	226169	peroxisome proliferative activated receptor, gamma, coactivator-related 1	chr19:46056538-46072909	+	1.27047	0.232843	5.45634	4.86054e-08	1.77835e-06	Yes	OK	292.638	150.356	399.35	89.6436	139.945	221.48	421.632	471.076	361.206	343.485
ENSMUSG00000027303	Ptpra	19262	protein tyrosine phosphatase, receptor type, A	chr2:130450277-130554300	+	-0.712064	0.13055	-5.45435	4.91524e-08	1.79346e-06	Yes	OK	745.868	967.578	579.585	1062.92	1006.16	833.654	545.372	599.552	641.49	531.925
ENSMUSG00000029823	Luc7l2	192196	LUC7-like 2 (S. cerevisiae)	chr6:38551333-38609470	+	0.599786	0.110011	5.45207	4.97876e-08	1.8117e-06	Yes	OK	1013.43	778.79	1189.42	753.34	745.236	837.794	1237.4	1047.07	1219.71	1253.48
ENSMUSG00000073468	Sft2d1	106489	SFT2 domain containing 1	chr17:8311102-8327442	+	1.28921	0.236536	5.45037	5.02656e-08	1.82414e-06	Yes	OK	57.5307	28.3422	79.4221	24.4989	28.4441	32.0835	91.6591	89.9328	57.381	78.7154
ENSMUSG00000052298	Cdc42se2	72729	CDC42 small effector 2	chr11:54717414-54787703	-	-0.55941	0.102674	-5.44843	5.08167e-08	1.83915e-06	Yes	OK	784.529	965.384	648.889	962.138	922.348	1011.67	655.363	614.541	695.928	629.723
ENSMUSG00000031760	Mt3	17751	metallothionein 3	chr8:94152606-94154148	+	-0.770006	0.141464	-5.44311	5.23574e-08	1.88981e-06	Yes	OK	272.031	361.706	204.775	403.118	345.122	336.877	178.735	201.278	199.362	239.724
ENSMUSG00000020644	Id2	15902	inhibitor of DNA binding 2	chr12:25093798-25096092	-	-0.794443	0.146057	-5.43926	5.3503e-08	1.92596e-06	Yes	OK	369.611	491.297	278.346	448.218	574.95	450.722	261.228	325.471	271.456	255.229
ENSMUSG00000036995	Asap3	230837	ArfGAP with SH3 domain, ankyrin repeat and PH domain 3	chr4:136206364-136246573	+	1.31846	0.24254	5.43603	5.44794e-08	1.95586e-06	Yes	OK	158.609	79.2794	218.106	120.267	56.509	61.0622	229.148	162.736	232.467	248.073
ENSMUSG00000056211	R3hdm1	226412	R3H domain containing 1	chr1:128103305-128237735	+	0.682031	0.125483	5.43527	5.47144e-08	1.95904e-06	Yes	OK	625.462	461.589	748.366	424.833	431.592	528.343	751.605	685.202	734.918	821.741
ENSMUSG00000031333	Abcb7	11306	ATP-binding cassette, sub-family B (MDR/TAP), member 7	chrX:104280564-104413846	-	-0.746418	0.137432	-5.43119	5.5979e-08	1.99897e-06	Yes	OK	376.076	496.394	285.836	527.283	491.514	470.386	270.394	237.679	334.722	300.55
ENSMUSG00000031548	Sfrp1	20377	secreted frizzled-related protein 1	chr8:23411501-23449632	+	1.50217	0.276645	5.42994	5.63731e-08	2.00427e-06	Yes	OK	43.1402	18.0884	61.9291	25.0557	17.825	11.3845	77.9102	47.1076	55.9097	66.7888
ENSMUSG00000086992	Gm15941	100503538	predicted gene 15941	chr15:37421132-37432664	-	1.48808	0.27406	5.42977	5.64267e-08	2.00427e-06	Yes	OK	68.2763	29.4089	97.4267	30.6236	15.1702	42.433	105.408	104.922	87.5428	91.8346
ENSMUSG00000029838	Ptn	19242	pleiotrophin	chr6:36715662-36811361	-	-0.729291	0.134341	-5.42866	5.67791e-08	2.00662e-06	Yes	OK	2021.21	2628.27	1565.92	2938.19	2474.64	2471.98	1617.78	1815.79	1466.89	1363.21
ENSMUSG00000038252	Ncapd2	68298	non-SMC condensin I complex, subunit D2	chr6:125168006-125191586	-	0.848069	0.156222	5.42862	5.67925e-08	2.00662e-06	Yes	OK	2157.17	1451.28	2686.58	1291.76	1532.95	1529.14	3194.32	2967.78	2129.72	2454.49
ENSMUSG00000022504	Ciita	12265	class II transactivator	chr16:10480071-10527640	+	2.07721	0.382733	5.4273	5.72123e-08	2.01613e-06	Yes	OK	113.375	17.7818	185.071	22.2717	15.5495	15.5243	329.973	66.379	112.555	231.376
ENSMUSG00000039377	Hlx	15284	H2.0-like homeobox	chr1:184727144-184732493	-	1.60038	0.294964	5.42567	5.77379e-08	2.02429e-06	Yes	OK	43.2328	16.6653	63.1585	10.0223	16.6872	23.2864	59.5784	64.2377	44.1392	84.6787
ENSMUSG00000030161	Gabarapl1	57436	gamma-aminobutyric acid (GABA) A receptor-associated protein-like 1	chr6:129533191-129542331	+	-0.943506	0.173905	-5.42542	5.78174e-08	2.02429e-06	Yes	OK	443.13	621.407	309.422	801.224	577.605	485.393	270.394	319.047	311.917	336.329
ENSMUSG00000056553	Ptprn2	19276	protein tyrosine phosphatase, receptor type, N polypeptide 2	chr12:116485719-117278167	+	-1.03022	0.18991	-5.42479	5.80223e-08	2.02429e-06	Yes	OK	293.379	421.804	197.06	520.601	419.835	324.975	183.318	205.561	159.637	239.724
ENSMUSG00000022211	Carmil3	268747	capping protein regulator and myosin 1 linker 3	chr14:55491092-55508264	+	0.992266	0.182916	5.42471	5.80486e-08	2.02429e-06	Yes	OK	181.228	111.794	233.304	125.278	99.3648	110.74	224.565	289.07	175.086	244.495
ENSMUSG00000049583	Grm5	108071	glutamate receptor, metabotropic 5	chr7:87584167-88135063	+	-0.887052	0.163579	-5.42278	5.86783e-08	2.04094e-06	Yes	OK	1592.21	2185.57	1147.19	2829.06	1757.09	1970.55	1072.41	1203.39	1151.3	1161.65
ENSMUSG00000033491	Prss35	244954	protease, serine 35	chr9:86743632-86757506	+	-1.22553	0.226754	-5.40469	6.4922e-08	2.25226e-06	Yes	OK	131.428	205.203	76.0976	251.113	196.833	167.662	41.2466	85.6503	105.934	71.5595
ENSMUSG00000039218	Srrm2	75956	serine/arginine repetitive matrix 2	chr17:23803186-23824743	+	0.890908	0.164907	5.40247	6.57285e-08	2.27434e-06	Yes	OK	4241.5	2793.09	5327.82	2601.33	2259.6	3518.32	5146.66	4879.92	5423.97	5860.72
ENSMUSG00000016200	Syt14	329324	synaptotagmin XIV	chr1:192891233-193035775	-	0.841818	0.15592	5.39905	6.69935e-08	2.31214e-06	Yes	OK	146.445	97.2974	183.306	98.5523	97.0893	96.2505	229.148	156.312	183.178	164.587
ENSMUSG00000027985	Lef1	16842	lymphoid enhancer binding factor 1	chr3:131112790-131224357	+	1.30624	0.242181	5.39367	6.90335e-08	2.37642e-06	Yes	OK	56.3316	28.9098	76.8979	33.4076	21.2383	32.0835	64.1614	72.8027	72.8297	97.7979
ENSMUSG00000018537	Pcgf2	22658	polycomb group ring finger 2	chr11:97688822-97700497	-	1.12819	0.209195	5.393	6.92928e-08	2.37923e-06	Yes	OK	107.875	60.8706	143.128	45.1002	55.7505	81.7612	160.403	134.899	141.245	135.963
ENSMUSG00000004771	Rab11a	53869	RAB11A, member RAS oncogene family	chr9:64715299-64737756	-	-0.575167	0.10674	-5.38849	7.10522e-08	2.4334e-06	Yes	OK	634.098	781.877	523.263	769.487	835.119	741.026	531.623	550.303	524.521	486.604
ENSMUSG00000042812	Foxf1	15227	forkhead box F1	chr8:121084385-121088154	+	1.22137	0.227057	5.37914	7.48406e-08	2.55661e-06	Yes	OK	67.0806	35.8322	90.5169	46.2138	34.8915	26.3913	96.242	77.0852	89.7497	98.9906
ENSMUSG00000006567	Atp7b	11979	ATPase, Cu++ transporting, beta polypeptide	chr8:21994347-22060074	-	1.2506	0.232618	5.37619	7.60801e-08	2.59234e-06	Yes	OK	83.6915	43.2071	114.055	35.6347	36.0292	57.9573	137.489	107.063	125.797	85.8713
ENSMUSG00000035632	Cnot3	232791	CCR4-NOT transcription complex, subunit 3	chr7:3645268-3661109	+	0.858538	0.159812	5.37219	7.77869e-08	2.64377e-06	Yes	OK	237.806	159.446	296.576	143.096	136.532	198.711	293.309	306.2	280.284	306.513
ENSMUSG00000034522	Zfp395	380912	zinc finger protein 395	chr14:65358675-65398930	+	1.40964	0.262512	5.36981	7.88216e-08	2.67215e-06	Yes	OK	67.747	31.1646	95.1838	18.3742	29.5819	45.5379	100.825	89.9328	108.877	81.1007
ENSMUSG00000034320	Slc26a2	13521	solute carrier family 26 (sulfate transporter), member 2	chr18:61196853-61211596	-	0.901303	0.167908	5.36785	7.96793e-08	2.69441e-06	Yes	OK	185.508	123.359	232.119	128.619	108.467	132.991	210.816	196.996	286.905	233.761
ENSMUSG00000007656	Arpp19	59046	cAMP-regulated phosphoprotein 19	chr9:75037731-75060313	+	-0.624802	0.116539	-5.36132	8.26147e-08	2.78663e-06	Yes	OK	486.883	612.487	392.68	568.485	654.215	614.762	407.883	349.025	417.851	395.962
ENSMUSG00000033253	Szt2	230676	seizure threshold 2	chr4:118362739-118409263	-	0.957739	0.178655	5.36083	8.28412e-08	2.78725e-06	Yes	OK	509.886	322.568	650.375	356.904	219.589	391.212	682.86	640.236	616.478	661.925
ENSMUSG00000034353	Ramp1	51801	receptor (calcitonin) activity modifying protein 1	chr1:91179821-91206790	+	-1.05781	0.197465	-5.35694	8.4645e-08	2.8408e-06	Yes	OK	281.327	410.2	184.672	484.41	360.671	385.52	155.82	216.267	235.409	131.192
ENSMUSG00000028673	Fuca1	71665	fucosidase, alpha-L- 1, tissue	chr4:135920725-135940300	+	-0.732607	0.136789	-5.35576	8.51962e-08	2.85215e-06	Yes	OK	257.761	337.283	198.12	356.904	356.879	298.066	178.735	218.408	204.512	190.825
ENSMUSG00000028546	Elavl4	15572	ELAV (embryonic lethal, abnormal vision, Drosophila)-like 4 (Hu antigen D)	chr4:110203736-110287511	-	-0.855076	0.15975	-5.35258	8.671e-08	2.89559e-06	Yes	OK	311.777	420.038	230.581	365.256	509.339	385.52	274.977	209.843	228.788	208.715
ENSMUSG00000024091	Vapa	30960	vesicle-associated membrane protein, associated protein A	chr17:65580052-65613555	-	-0.619071	0.115704	-5.35049	8.77164e-08	2.92192e-06	Yes	OK	706.294	884.787	572.425	783.407	974.685	896.269	577.452	588.846	556.89	566.512
ENSMUSG00000052942	Glis3	226075	GLIS family zinc finger 3	chr19:28258850-28680077	-	1.59692	0.298971	5.34139	9.22358e-08	3.06484e-06	Yes	OK	65.2827	26.2583	94.5511	19.4877	26.1686	33.1185	41.2466	70.6615	143.452	122.844
ENSMUSG00000002227	Mov10	17454	Moloney leukemia virus 10	chr3:104794833-104818305	-	1.32931	0.249047	5.33759	9.41923e-08	3.12145e-06	Yes	OK	95.1926	46.1853	131.948	59.02	28.8234	50.7127	169.569	107.063	104.463	146.697
ENSMUSG00000029381	Shroom3	27428	shroom family member 3	chr5:92809381-92965759	+	1.31053	0.245547	5.33718	9.44059e-08	3.12145e-06	Yes	OK	55.9419	26.7628	77.8263	19.4877	33.3744	27.4262	105.408	66.379	69.1514	70.3668
ENSMUSG00000025026	Add3	27360	adducin 3 (gamma)	chr19:53140442-53247326	+	-1.01251	0.189765	-5.33558	9.52398e-08	3.14127e-06	Yes	OK	1280.35	1836.03	863.598	1589.64	2007.4	1911.04	545.372	1089.9	965.178	853.943
ENSMUSG00000025781	Atp5c1	11949	ATP synthase, H+ transporting, mitochondrial F1 complex, gamma polypeptide 1	chr2:10056030-10080510	-	-0.741341	0.139024	-5.33245	9.68941e-08	3.18798e-06	Yes	OK	655.744	859.748	502.741	753.34	1025.88	800.018	453.713	511.76	507.601	537.889
ENSMUSG00000021477	Ctsl	13039	cathepsin L	chr13:64361889-64370520	-	-0.971683	0.182879	-5.31324	1.0769e-07	3.53452e-06	Yes	OK	547.867	780.222	373.602	911.469	695.933	733.264	242.897	353.307	450.956	447.247
ENSMUSG00000015852	Fcrls	80891	Fc receptor-like S, scavenger receptor	chr3:87250964-87263524	-	-1.76685	0.333093	-5.30438	1.13055e-07	3.70152e-06	Yes	OK	80.3701	148.219	29.4832	274.499	92.5382	77.6214	18.3318	36.4014	34.5757	28.6238
ENSMUSG00000004263	Atn1	13498	atrophin 1	chr6:124742543-124756487	-	1.04543	0.197219	5.30084	1.15273e-07	3.76492e-06	Yes	OK	289.758	173.434	377.001	148.664	134.635	237.004	362.053	451.805	324.423	369.724
ENSMUSG00000039512	Uhrf1bp1	224648	UHRF1 (ICBP90) binding protein 1	chr17:27856506-27900040	+	0.683313	0.129103	5.29278	1.20473e-07	3.9252e-06	Yes	OK	386.596	286.186	461.903	265.59	274.201	318.765	398.717	531.032	463.462	454.403
ENSMUSG00000038766	Gabpb2	213054	GA repeat binding protein, beta 2	chr3:95181765-95217942	-	0.765117	0.14461	5.29089	1.21723e-07	3.95628e-06	Yes	OK	261.247	184.078	319.124	174.276	185.456	192.501	357.47	248.386	354.585	316.054
ENSMUSG00000059323	Tonsl	72749	tonsoku-like, DNA repair protein	chr15:76626236-76639929	-	1.43027	0.270456	5.28837	1.23412e-07	4.00147e-06	Yes	OK	108.78	48.2697	154.163	29.51	48.5446	66.7544	169.569	194.854	91.221	161.009
ENSMUSG00000059323	Vps28	66914	vacuolar protein sorting 28	chr15:76622085-76626084	-	1.43027	0.270456	5.28837	1.23412e-07	4.00147e-06	Yes	OK	108.78	48.2697	154.163	29.51	48.5446	66.7544	169.569	194.854	91.221	161.009
ENSMUSG00000018983	E2f2	242705	E2F transcription factor 2	chr4:136180781-136196056	+	1.2584	0.237985	5.28774	1.23839e-07	4.00561e-06	Yes	OK	98.5335	50.0453	134.9	35.0779	47.7861	67.2719	151.238	167.018	104.463	116.88
ENSMUSG00000004096	Cwc15	66070	CWC15 spliceosome-associated protein	chr9:14500618-14510620	+	-0.835743	0.158111	-5.28582	1.25144e-07	4.0381e-06	Yes	OK	263.123	356.212	193.307	353.563	419.077	295.996	178.735	190.572	186.856	217.064
ENSMUSG00000029290	Zfp326	54367	zinc finger protein 326	chr5:105876567-105915820	+	0.786063	0.148944	5.27756	1.30912e-07	4.21405e-06	Yes	OK	227.306	159.618	278.073	140.869	163.08	174.907	270.394	254.81	325.895	261.192
ENSMUSG00000021917	Spcs1	69019	signal peptidase complex subunit 1 homolog (S. cerevisiae)	chr14:30999825-31001666	-	-0.776144	0.147134	-5.27509	1.3269e-07	4.26104e-06	Yes	OK	175.892	235.041	131.529	247.773	220.347	237.004	123.74	115.628	141.245	145.504
ENSMUSG00000031591	Asah1	11886	N-acylsphingosine amidohydrolase 1	chr8:41340645-41374697	-	-0.680606	0.129078	-5.27281	1.34353e-07	4.30412e-06	Yes	OK	454.696	583.264	358.27	632.516	613.255	504.022	366.636	325.471	379.597	361.375
ENSMUSG00000103707	Pcdha6	12937	protocadherin alpha 6	chr18:36967755-37187657	+	1.58816	0.301385	5.26952	1.36781e-07	4.37144e-06	Yes	OK	25.857	9.9447	37.7912	7.7951	9.10212	12.9369	45.8295	25.6951	42.6679	36.9724
ENSMUSG00000050908	Tvp23a	383103	trans-golgi network vesicle protein 23A	chr16:10420558-10447350	-	0.99144	0.188204	5.2679	1.37996e-07	4.39977e-06	Yes	OK	207.75	126.862	268.416	134.744	103.537	142.306	362.053	196.996	248.651	265.963
ENSMUSG00000062729	Ppox	19044	protoporphyrinogen oxidase	chr1:171276991-171281186	-	0.903365	0.171635	5.26328	1.41508e-07	4.50102e-06	Yes	OK	115.175	75.5276	144.911	80.1781	68.2659	78.1389	151.238	119.91	142.717	165.779
ENSMUSG00000029163	Emilin1	100952	elastin microfibril interfacer 1	chr5:30913785-30921273	+	1.19636	0.227482	5.25914	1.44728e-07	4.59157e-06	Yes	OK	221.462	120.74	297.003	134.744	70.1622	157.313	265.811	267.657	297.94	356.605
ENSMUSG00000022477	Aco2	11429	aconitase 2, mitochondrial	chr15:81872462-81915137	+	-0.652503	0.124079	-5.25875	1.4504e-07	4.59157e-06	Yes	OK	973.436	1235.31	777.033	1084.08	1372.14	1249.7	747.022	858.644	785.678	716.787
ENSMUSG00000045659	Plekha7	233765	pleckstrin homology domain containing, family A member 7	chr7:116123484-116237776	-	1.0535	0.200355	5.25818	1.45492e-07	4.595e-06	Yes	OK	69.0878	40.9424	90.1969	36.1915	40.5803	46.0554	100.825	77.0852	93.428	89.4493
ENSMUSG00000029062	Cdk11b	12537	cyclin-dependent kinase 11B	chr4:155624868-155649932	+	0.771582	0.146866	5.25364	1.49125e-07	4.69867e-06	Yes	OK	321.567	224.654	394.252	194.877	220.347	258.738	403.3	434.675	334.722	404.311
ENSMUSG00000061607	Mdc1	240087	mediator of DNA damage checkpoint 1	chr17:35841497-35859670	+	0.99977	0.190393	5.25109	1.51205e-07	4.75301e-06	Yes	OK	472.478	289.855	609.445	195.991	301.508	372.065	710.358	535.314	592.201	599.907
ENSMUSG00000048264	Dip2c	208440	disco interacting protein 2 homolog C	chr13:9276524-9668926	+	-0.581571	0.110773	-5.25014	1.51985e-07	4.76634e-06	Yes	OK	731.229	907.367	599.126	849.109	909.453	963.54	549.955	668.072	608.386	570.09
ENSMUSG00000069911	Fam196b	574403	family with sequence similarity 196, member B	chr11:34314821-34422640	+	-0.984369	0.187592	-5.24739	1.5427e-07	4.82248e-06	Yes	OK	202.2	290.578	135.917	306.793	238.931	326.01	114.574	111.345	175.821	141.926
ENSMUSG00000060002	Chpt1	212862	choline phosphotransferase 1	chr10:88473475-88503970	-	-1.31508	0.250642	-5.24682	1.54745e-07	4.82248e-06	Yes	OK	659.995	1040.95	374.279	1674.28	835.878	612.692	407.883	340.46	420.794	327.981
ENSMUSG00000062115	Rai1	19377	retinoic acid induced 1	chr11:60105012-60199195	+	1.03804	0.197846	5.24669	1.54855e-07	4.82248e-06	Yes	OK	367.321	221.246	476.877	163.14	185.456	315.143	449.13	507.478	467.876	483.026
ENSMUSG00000017831	Rab5a	271457	RAB5A, member RAS oncogene family	chr17:53479233-53507678	+	-0.715739	0.136585	-5.24024	1.60366e-07	4.98196e-06	Yes	OK	274.2	359.41	210.293	395.88	335.641	346.709	183.318	205.561	237.616	214.678
ENSMUSG00000039477	Tnrc18	231861	trinucleotide repeat containing 18	chr5:142754793-142817387	-	1.0912	0.208251	5.23983	1.6072e-07	4.98196e-06	Yes	OK	994.794	577.664	1307.64	547.884	373.187	811.92	1379.47	1383.25	1128.49	1339.35
ENSMUSG00000026468	Lhx4	16872	LIM homeobox protein 4	chr1:155701693-155742027	-	2.0344	0.388354	5.23853	1.61865e-07	5.00585e-06	Yes	OK	17.0031	2.23824	28.0767	2.78396	3.41329	0.517476	54.9955	14.9888	12.5061	29.8164
ENSMUSG00000019998	Stx7	53331	syntaxin 7	chr10:24149316-24188959	+	-0.617409	0.117874	-5.23789	1.62425e-07	5.01161e-06	Yes	OK	467.727	585.411	379.464	633.63	590.121	532.483	398.717	355.449	364.149	399.54
ENSMUSG00000032030	Cul5	75717	cullin 5	chr9:53614581-53667507	-	-0.627985	0.11995	-5.23538	1.64647e-07	5.06315e-06	Yes	OK	496.5	628.463	397.527	590.757	674.694	619.936	366.636	387.567	449.484	386.421
ENSMUSG00000047793	Sned1	208777	sushi, nidogen and EGF-like domains 1	chr1:93235896-93296448	+	1.43254	0.273639	5.23515	1.64852e-07	5.06315e-06	Yes	OK	69.2551	29.9975	98.6983	36.7483	35.65	17.5942	137.489	87.7915	66.9445	102.569
ENSMUSG00000022887	Masp1	17174	mannan-binding lectin serine peptidase 1	chr16:23451784-23520590	-	-0.792432	0.151409	-5.23373	1.66127e-07	5.09064e-06	Yes	OK	275.123	365.437	207.388	410.356	308.714	377.24	201.65	239.821	200.833	187.247
ENSMUSG00000030780	BC017158	233913	cDNA sequence BC017158	chr7:128271378-128298131	-	0.98165	0.187584	5.23311	1.66681e-07	5.09595e-06	Yes	OK	78.199	48.9516	100.135	54.5657	47.7861	44.5029	91.6591	109.204	97.1063	102.569
ENSMUSG00000037306	Man1c1	230815	mannosidase, alpha, class 1C, member 1	chr4:134561689-134704290	-	0.820829	0.157164	5.22275	1.76283e-07	5.37725e-06	Yes	OK	189.895	130.012	234.806	154.788	108.467	126.782	233.731	246.245	230.26	228.99
ENSMUSG00000062014	Gmfb	63985	glia maturation factor, beta	chr14:46808148-46822242	-	-0.614535	0.117706	-5.22092	1.78032e-07	5.41823e-06	Yes	OK	1347.44	1687.63	1092.3	1893.65	1664.93	1504.3	1104.49	1119.88	1135.85	1008.99
ENSMUSG00000104318	Pcdha7	12939	protocadherin alpha 7	chr18:36973923-37187657	+	1.51037	0.289345	5.21997	1.78955e-07	5.43398e-06	Yes	OK	28.8462	12.4522	41.1417	16.147	11.3776	9.83204	32.0807	42.8251	51.4958	38.165
ENSMUSG00000015484	Fam163a	329274	family with sequence similarity 163, member A	chr1:156075955-156205026	-	-1.42781	0.273552	-5.21951	1.79395e-07	5.43501e-06	Yes	OK	155.604	253.783	81.9691	378.062	212.003	171.285	82.4932	117.769	78.7149	48.899
ENSMUSG00000030223	Ptpro	19277	protein tyrosine phosphatase, receptor type, O	chr6:137252298-137464633	+	-0.675327	0.129509	-5.21454	1.84275e-07	5.57026e-06	Yes	OK	671.014	859.292	529.806	991.648	763.44	822.787	494.959	578.139	504.658	541.467
ENSMUSG00000024143	Rhoq	104215	ras homolog family member Q	chr17:86963110-87000069	+	-0.797252	0.153082	-5.20801	1.90878e-07	5.74188e-06	Yes	OK	604.839	808.721	451.928	645.323	805.917	974.925	398.717	473.218	473.025	462.751
ENSMUSG00000038633	Degs1	13244	delta(4)-desaturase, sphingolipid 1	chr1:182275769-182282759	-	-0.712804	0.136869	-5.20792	1.90969e-07	5.74188e-06	Yes	OK	334.204	434.622	258.891	419.822	479.378	404.666	229.148	295.493	279.548	231.376
ENSMUSG00000032637	Atxn2l	233871	ataxin 2-like	chr7:126491707-126503302	-	1.01115	0.194165	5.20766	1.91239e-07	5.74188e-06	Yes	OK	651.636	399.407	840.807	308.463	328.814	560.944	719.524	903.61	831.289	908.805
ENSMUSG00000002799	Jag2	16450	jagged 2	chr12:112908589-112929495	-	0.972437	0.186752	5.20711	1.91802e-07	5.7459e-06	Yes	OK	80.5281	50.6329	102.95	55.1225	43.9936	52.7826	100.825	107.063	103.727	100.183
ENSMUSG00000037649	H2-DMa	14998	histocompatibility 2, class II, locus DMa	chr17:34122831-34139101	+	1.46181	0.281054	5.20117	1.98033e-07	5.91464e-06	Yes	OK	122.045	51.8409	174.698	70.7127	35.65	49.1602	297.892	102.78	138.303	159.816
ENSMUSG00000031703	Itfg1	71927	integrin alpha FG-GAP repeat containing 1	chr8:85717556-85840949	-	-0.831605	0.159896	-5.20091	1.98318e-07	5.91464e-06	Yes	OK	633.162	856.344	465.775	1001.11	915.901	652.02	426.215	436.816	503.923	496.146
ENSMUSG00000027634	Ndrg3	29812	N-myc downstream regulated gene 3	chr2:156927341-156992111	-	-0.695098	0.133679	-5.19975	1.99559e-07	5.93842e-06	Yes	OK	552.003	711.448	432.42	759.465	783.92	590.958	421.632	443.24	450.956	413.852
ENSMUSG00000027570	Col9a3	12841	collagen, type IX, alpha 3	chr2:180598221-180622185	+	1.16481	0.224075	5.19831	2.01105e-07	5.97085e-06	Yes	OK	458.298	252.937	612.319	373.051	172.561	213.2	687.443	498.913	547.326	715.595
ENSMUSG00000026516	Nvl	67459	nuclear VCP-like	chr1:181087137-181144204	-	0.611917	0.117724	5.19791	2.0154e-07	5.97085e-06	Yes	OK	364.243	277.363	429.402	261.692	287.854	282.542	458.295	376.861	424.472	457.981
ENSMUSG00000021458	2010111I01Rik	72061	RIKEN cDNA 2010111I01 gene	chr13:62964892-63302877	+	0.837302	0.161104	5.19729	2.02217e-07	5.97207e-06	Yes	OK	269.514	184.874	332.994	180.958	153.219	220.445	284.143	310.482	360.47	376.88
ENSMUSG00000014813	Stc1	20855	stanniocalcin 1	chr14:69029288-69041401	+	-1.10345	0.212322	-5.19705	2.02473e-07	5.97207e-06	Yes	OK	96.3617	139.249	64.1959	131.403	158.529	127.817	77.9102	77.0852	58.8523	42.9357
ENSMUSG00000002028	Kmt2a	214162	lysine (K)-specific methyltransferase 2A	chr9:44803354-44881274	-	0.842145	0.162132	5.1942	2.05598e-07	6.05092e-06	Yes	OK	1309.74	884.452	1628.71	819.599	700.484	1133.27	1741.52	1501.02	1578.71	1693.57
ENSMUSG00000036098	Myrf	225908	myelin regulatory factor	chr19:10208270-10240748	-	1.09571	0.211003	5.19289	2.07057e-07	6.08048e-06	Yes	OK	212.167	125.073	277.488	112.472	105.433	157.313	197.067	250.527	383.276	279.082
ENSMUSG00000028127	Abcd3	19299	ATP-binding cassette, sub-family D (ALD), member 3	chr3:121758909-121815215	-	-1.214	0.233812	-5.19219	2.0783e-07	6.08984e-06	Yes	OK	866.09	1325.41	521.602	2078.51	986.442	911.275	444.547	550.303	552.476	539.081
ENSMUSG00000033737	Fndc3c1	333564	fibronectin type III domain containing 3C1	chrX:106420042-106485229	-	1.9321	0.372987	5.18007	2.21805e-07	6.48512e-06	Yes	OK	12.062	2.59633	19.1613	3.34076	3.41329	1.03495	18.3318	12.8475	22.8053	22.6605
ENSMUSG00000027582	Zgpat	229007	zinc finger, CCCH-type with G patch domain	chr2:181364930-181380793	+	0.828887	0.160075	5.17812	2.24134e-07	6.53896e-06	Yes	OK	212.861	143.853	264.618	146.436	127.809	157.313	288.726	250.527	216.282	302.935
ENSMUSG00000029068	Ccnl2	56036	cyclin L2	chr4:155812488-155824543	+	0.624553	0.120709	5.17403	2.29104e-07	6.6694e-06	Yes	OK	551.758	417.717	652.289	371.937	423.248	457.966	655.363	657.366	595.144	701.283
ENSMUSG00000020349	Ppp2ca	19052	protein phosphatase 2 (formerly 2A), catalytic subunit, alpha isoform	chr11:52098823-52122749	+	-0.567178	0.109662	-5.17204	2.31547e-07	6.72592e-06	Yes	OK	1543.75	1904.44	1273.24	1974.39	2010.05	1728.89	1241.98	1284.75	1377.14	1189.08
ENSMUSG00000032118	Fez1	235180	fasciculation and elongation protein zeta 1 (zygin I)	chr9:36843658-36878640	+	-0.695816	0.134549	-5.17147	2.32264e-07	6.73214e-06	Yes	OK	899.408	1159.02	704.697	1341.87	1171.14	964.058	678.277	755.864	698.871	685.778
ENSMUSG00000037243	Zfp692	103836	zinc finger protein 692	chr11:58307068-58314613	+	1.06665	0.206325	5.16977	2.34388e-07	6.77904e-06	Yes	OK	132.006	76.5953	173.565	60.1336	75.4717	94.1806	210.816	152.029	134.625	196.788
ENSMUSG00000025145	Lrrc45	217366	leucine rich repeat containing 45	chr11:120713952-120721127	+	0.897683	0.173798	5.1651	2.40307e-07	6.93523e-06	Yes	OK	183.4	119.323	231.458	128.619	106.191	123.159	261.228	190.572	194.948	279.082
ENSMUSG00000000078	Klf6	23849	Kruppel-like factor 6	chr13:5861488-5870393	+	-0.731995	0.141892	-5.15883	2.48494e-07	7.15608e-06	Yes	OK	398.876	526.444	303.201	512.806	504.03	562.496	233.731	312.623	367.091	299.357
ENSMUSG00000029840	Mtpn	14489	myotrophin	chr6:35508823-35539888	-	-0.565676	0.109725	-5.15541	2.53075e-07	7.27237e-06	Yes	OK	1125.01	1388.24	927.59	1514.48	1386.56	1263.68	912.008	871.491	979.891	946.97
ENSMUSG00000051844	B230319C09Rik	320775	RIKEN cDNA B230319C09 gene	chr6:83441754-83448322	+	1.52426	0.296029	5.14903	2.61837e-07	7.50804e-06	Yes	OK	25.4936	10.6609	36.6182	8.90868	9.10212	13.9719	32.0807	36.4014	43.4036	34.5871
ENSMUSG00000010608	Rbm25	67039	RNA binding motif protein 25	chr12:83632233-83683123	+	0.579322	0.112579	5.14593	2.66201e-07	7.61689e-06	Yes	OK	950.878	737.758	1110.72	657.015	744.857	811.402	1072.41	1181.97	1127.02	1061.47
ENSMUSG00000020627	Klhl29	208439	kelch-like 29	chr12:5077465-5375682	-	1.28937	0.250589	5.14537	2.66998e-07	7.62339e-06	Yes	OK	72.929	36.4027	100.324	21.1581	40.9595	47.0903	100.825	100.639	85.3358	114.495
ENSMUSG00000015932	Dstn	56431	destrin	chr2:143915330-143943324	+	-0.670901	0.130401	-5.1449	2.67667e-07	7.62623e-06	Yes	OK	658.124	841.979	520.232	925.946	877.596	722.397	522.457	483.924	576.017	498.531
ENSMUSG00000035299	Mid1	17318	midline 1	chrX:169685198-169990797	+	1.30211	0.253137	5.1439	2.69089e-07	7.65046e-06	Yes	OK	43.5523	22.1627	59.5946	22.2717	17.825	26.3913	59.5784	44.9664	70.6227	63.2109
ENSMUSG00000030409	Dmpk	13400	dystrophia myotonica-protein kinase	chr7:19083848-19093820	+	1.34676	0.261937	5.14155	2.7248e-07	7.73045e-06	Yes	OK	88.6308	42.6316	123.13	35.0779	30.7196	62.0971	119.157	115.628	91.9567	165.779
ENSMUSG00000034312	Iqsec1	232227	IQ motif and Sec7 domain 1	chr6:90659597-90716529	-	0.602218	0.117247	5.13631	2.80186e-07	7.93228e-06	Yes	OK	439.238	338.808	514.561	361.358	329.573	325.492	494.959	462.511	531.878	568.898
ENSMUSG00000012017	Scarf2	224024	scavenger receptor class F, member 2	chr16:17797281-17808293	+	1.64772	0.320966	5.13362	2.84227e-07	8.02971e-06	Yes	OK	30.1717	10.3987	45.0014	9.46547	5.68882	16.0418	54.9955	49.2489	31.6331	44.1283
ENSMUSG00000044641	Pard6b	58220	par-6 family cell polarity regulator beta	chr2:168081003-168101203	+	1.4905	0.290548	5.12995	2.89812e-07	8.17025e-06	Yes	OK	27.0127	11.1877	38.8814	8.35189	11.7569	13.4544	45.8295	29.9776	36.7827	42.9357
ENSMUSG00000051278	Zgrf1	71643	zinc finger, GRF-type containing 1	chr3:127553488-127618023	+	1.1808	0.230441	5.1241	2.98959e-07	8.41041e-06	Yes	OK	215.987	116.668	290.476	63.4744	139.566	146.963	334.556	293.352	259.686	274.311
ENSMUSG00000085886	D030047H15Rik	100037396	RIKEN cDNA D030047H15 gene	chr7:4126339-4136926	-	1.43282	0.279914	5.11878	3.07518e-07	8.63307e-06	Yes	OK	29.7727	13.4496	42.015	11.1359	12.1362	17.0767	32.0807	51.3902	40.4609	44.1283
ENSMUSG00000036882	Arhgap33	233071	Rho GTPase activating protein 33	chr7:30522225-30535060	-	1.1134	0.21761	5.11647	3.11303e-07	8.72103e-06	Yes	OK	375.897	213.861	497.423	164.254	157.012	320.318	568.286	507.478	467.876	446.054
ENSMUSG00000048997	Atxn7l2	72522	ataxin 7-like 2	chr3:108202227-108210527	-	1.14741	0.224281	5.11594	3.12184e-07	8.72745e-06	Yes	OK	57.3788	32.811	75.8047	27.2828	33.3744	37.7758	64.1614	66.379	86.8071	85.8713
ENSMUSG00000011158	Brf1	72308	BRF1, RNA polymerase III transcription initiation factor 90 kDa subunit	chr12:112959861-113000621	-	0.703849	0.137593	5.11543	3.13028e-07	8.73282e-06	Yes	OK	231.518	168.849	278.52	152.004	168.768	185.774	252.063	316.906	264.835	280.275
ENSMUSG00000020412	Ascc2	75452	activating signal cointegrator 1 complex subunit 2	chr11:4637792-4683386	+	0.867567	0.169668	5.11334	3.16517e-07	8.8118e-06	Yes	OK	290.953	193.064	364.369	174.276	161.183	243.731	403.3	314.765	339.872	399.54
ENSMUSG00000020386	Sar1b	66397	secretion associated Ras related GTPase 1B	chr11:51763662-51791953	+	-0.683533	0.133703	-5.11232	3.1823e-07	8.8411e-06	Yes	OK	193.422	248.727	151.943	250	247.274	248.906	151.238	152.029	162.579	141.926
ENSMUSG00000032534	Cep63	28135	centrosomal protein 63	chr9:102586577-102626124	-	0.833107	0.163034	5.11003	3.22114e-07	8.93049e-06	Yes	OK	123.651	82.638	154.411	75.167	92.5382	80.2088	169.569	154.17	141.245	152.66
ENSMUSG00000021767	Kat6b	54169	K(lysine) acetyltransferase 6B	chr14:21499784-21672478	+	0.58928	0.115372	5.10766	3.26172e-07	9.02179e-06	Yes	OK	427.832	331.556	500.038	345.768	310.989	337.912	499.542	464.653	551.74	484.219
ENSMUSG00000029465	Arpc3	56378	actin related protein 2/3 complex, subunit 3	chr5:122391877-122406181	+	-0.640763	0.12546	-5.10732	3.26754e-07	9.02179e-06	Yes	OK	380.395	481.224	304.773	492.761	524.51	426.4	307.058	286.928	303.089	322.018
ENSMUSG00000049612	Omg	18377	oligodendrocyte myelin glycoprotein	chr11:79500981-79504082	-	-1.06685	0.209153	-5.10082	3.38183e-07	9.31812e-06	Yes	OK	453.515	662.428	296.83	935.411	605.291	446.582	288.726	267.657	324.423	306.513
ENSMUSG00000040164	Kcns1	16538	K+ voltage-gated channel, subfamily S, 1	chr2:164163618-164171113	-	1.29617	0.254175	5.09953	3.40507e-07	9.36288e-06	Yes	OK	35.1817	17.6352	48.3416	15.5902	19.7213	17.5942	45.8295	49.2489	52.9671	45.321
ENSMUSG00000027075	Slc43a1	72401	solute carrier family 43, member 1	chr2:84840322-84863586	+	1.62265	0.318379	5.09659	3.45821e-07	9.48952e-06	Yes	OK	22.906	8.37543	33.804	6.12472	11.7569	7.24466	22.9148	44.9664	37.5183	29.8164
ENSMUSG00000051331	Cacna1c	12288	calcium channel, voltage-dependent, L type, alpha 1C subunit	chr6:118587239-119108495	-	0.689536	0.135349	5.0945	3.49654e-07	9.5751e-06	Yes	OK	595.205	435.837	714.732	445.991	358.017	503.504	756.188	695.908	690.043	716.787
ENSMUSG00000067194	Eif1ax	66235	eukaryotic translation initiation factor 1A, X-linked	chrX:159372194-159385699	+	-0.63469	0.124599	-5.09386	3.50847e-07	9.58814e-06	Yes	OK	726.532	915.636	584.704	807.349	1050.54	889.024	591.201	605.976	587.052	554.586
ENSMUSG00000026893	Gca	227960	grancalcin	chr2:62664326-62694109	+	1.46302	0.287422	5.09015	3.57784e-07	9.75781e-06	Yes	OK	37.2857	15.4207	53.6844	13.363	20.4798	12.4194	77.9102	32.1189	52.2314	52.4769
ENSMUSG00000022994	Adcy6	11512	adenylate cyclase 6	chr15:98589985-98607633	-	0.751483	0.147722	5.08714	3.63502e-07	9.89362e-06	Yes	OK	466.412	332.271	567.018	308.463	283.683	404.666	527.04	556.727	551.005	633.301
ENSMUSG00000037138	Aff3	16764	AF4/FMR2 family, member 3	chr1:38175990-38627244	-	1.17765	0.231668	5.08335	3.70828e-07	1.00725e-05	Yes	OK	96.1809	53.0336	128.541	36.1915	71.6792	51.2301	100.825	126.334	133.153	153.853
ENSMUSG00000020140	Lgr5	14160	leucine rich repeat containing G protein coupled receptor 5	chr10:115450313-115587780	-	1.1703	0.230278	5.08213	3.73223e-07	1.01171e-05	Yes	OK	95.1484	52.1994	127.36	41.7594	68.2659	46.5728	105.408	167.018	136.832	100.183
ENSMUSG00000021143	Pacs2	217893	phosphofurin acidic cluster sorting protein 2	chr12:113014507-113074401	+	0.576622	0.11351	5.07992	3.77603e-07	1.01987e-05	Yes	OK	357.408	279.87	415.562	280.623	272.305	286.682	366.636	447.523	441.392	406.696
ENSMUSG00000025813	Homer2	26557	homer scaffolding protein 2	chr7:81600480-81692965	-	0.93419	0.183909	5.07963	3.78172e-07	1.01987e-05	Yes	OK	108.576	68.3523	138.745	72.383	69.0244	63.6496	142.072	169.159	112.555	131.192
ENSMUSG00000028438	Kif24	109242	kinesin family member 24	chr4:41390747-41464848	-	1.24477	0.245059	5.07946	3.78519e-07	1.01987e-05	Yes	OK	84.4241	42.5231	115.85	30.0668	40.5803	56.9224	164.986	89.9328	96.3706	112.11
ENSMUSG00000079491	H2-T10	15024	histocompatibility 2, T region locus 10	chr17:36115870-36121444	-	1.39197	0.274113	5.0781	3.81232e-07	1.02512e-05	Yes	OK	49.9625	21.6875	71.1688	21.1581	20.1005	23.8039	119.157	53.5314	65.4732	46.5136
ENSMUSG00000001847	Rac1	19353	RAS-related C3 botulinum substrate 1	chr5:143505480-143527993	-	-0.543051	0.106979	-5.07623	3.84994e-07	1.03316e-05	Yes	OK	865.173	1058.28	720.345	1168.71	1025.51	980.617	714.941	717.321	727.561	721.558
ENSMUSG00000019804	Snx3	54198	sorting nexin 3	chr10:42502053-42535369	+	-0.610365	0.12052	-5.06442	4.09637e-07	1.09709e-05	Yes	OK	510.219	638.687	413.868	689.309	650.801	575.951	421.632	406.839	446.542	380.458
ENSMUSG00000030105	Arl8b	67166	ADP-ribosylation factor-like 8B	chr6:108783058-108823723	+	-0.725128	0.1432	-5.06375	4.11094e-07	1.09813e-05	Yes	OK	533.458	699.241	409.12	790.089	677.349	630.286	362.053	355.449	469.347	449.632
ENSMUSG00000027010	Slc25a12	78830	solute carrier family 25 (mitochondrial carrier, Aralar), member 12	chr2:71274294-71367554	-	-0.675966	0.133498	-5.06348	4.11665e-07	1.09813e-05	Yes	OK	424.971	541.387	337.66	467.706	575.33	581.126	348.305	374.72	316.331	311.284
ENSMUSG00000039298	Cdk5rap2	214444	CDK5 regulatory subunit associated protein 2	chr4:70216854-70410435	-	0.640977	0.126614	5.06246	4.13883e-07	1.10185e-05	Yes	OK	1262.1	948.507	1497.29	981.625	833.602	1030.29	1604.03	1284.75	1502.2	1598.16
ENSMUSG00000049691	Nkx3-2	12020	NK3 homeobox 2	chr5:41761482-41764220	-	1.76994	0.349825	5.0595	4.2035e-07	1.11518e-05	Yes	OK	24.5802	7.19191	37.6214	13.9198	4.55106	3.10486	41.2466	29.9776	37.5183	41.743
ENSMUSG00000030795	Fus	233908	fused in sarcoma	chr7:127967478-127982031	+	1.14752	0.226808	5.05941	4.20557e-07	1.11518e-05	Yes	OK	613.407	341.408	817.407	204.343	301.887	517.994	847.847	783.7	834.231	803.851
ENSMUSG00000076432	Ywhaq	22630	tyrosine 3-monooxygenase/tryptophan 5-monooxygenase activation protein, theta polypeptide	chr12:21390328-21417436	-	-0.860311	0.170073	-5.05847	4.22639e-07	1.11849e-05	Yes	OK	188.262	255.787	137.618	276.169	283.683	207.508	155.82	113.487	146.395	134.77
ENSMUSG00000076432	Cdk5rap2	214444	CDK5 regulatory subunit associated protein 2	chr4:70216854-70410435	-	-0.860311	0.170073	-5.05847	4.22639e-07	1.11849e-05	Yes	OK	188.262	255.787	137.618	276.169	283.683	207.508	155.82	113.487	146.395	134.77
ENSMUSG00000067377	Tspan6	56496	tetraspanin 6	chrX:133891069-133898429	-	-0.74202	0.146734	-5.0569	4.26116e-07	1.12547e-05	Yes	OK	453.206	593.964	347.637	698.218	556.367	527.308	362.053	312.623	395.046	320.825
ENSMUSG00000030551	Nr2f2	11819	nuclear receptor subfamily 2, group F, member 2	chr7:70351949-70360593	-	1.02786	0.203356	5.05447	4.31587e-07	1.13767e-05	Yes	OK	96.2569	58.0066	124.945	61.804	69.7829	42.433	128.323	111.345	126.532	133.578
ENSMUSG00000019210	Atp6v1e1	11973	ATPase, H+ transporting, lysosomal V1 subunit E1	chr6:120795243-120822685	-	-0.642267	0.127302	-5.04524	4.52956e-07	1.18932e-05	Yes	OK	391.23	491.092	316.333	461.581	525.268	486.427	339.139	353.307	294.997	277.889
ENSMUSG00000022514	Il1rap	16180	interleukin 1 receptor accessory protein	chr16:26581704-26702354	+	-0.875657	0.17367	-5.04207	4.60525e-07	1.20683e-05	Yes	OK	2298.4	3149.51	1660.07	2456.57	3239.22	3752.74	1379.47	2019.21	1712.6	1528.99
ENSMUSG00000021182	Ccdc88c	68339	coiled-coil domain containing 88C	chr12:100912699-101028983	-	0.813567	0.161673	5.03217	4.84962e-07	1.26839e-05	Yes	OK	299.668	205.896	369.997	221.603	157.012	239.074	384.968	338.319	396.517	360.183
ENSMUSG00000020427	Igfbp3	16009	insulin-like growth factor binding protein 3	chr11:7206090-7213923	-	-1.25944	0.250323	-5.03125	4.87294e-07	1.272e-05	Yes	OK	1492	2322.7	868.98	1376.95	3271.83	2319.33	604.95	1141.29	1009.32	720.365
ENSMUSG00000017412	Cacnb4	12298	calcium channel, voltage-dependent, beta 4 subunit	chr2:52428319-52676609	-	-0.961377	0.191259	-5.02657	4.99318e-07	1.30085e-05	Yes	OK	312.095	436.408	218.861	468.263	529.44	311.521	265.811	218.408	211.133	180.091
ENSMUSG00000039361	Picalm	233489	phosphatidylinositol binding clathrin assembly protein	chr7:90130231-90209447	+	-0.558024	0.11104	-5.02543	5.02309e-07	1.30577e-05	Yes	OK	1603.77	1974.27	1325.89	1884.19	2146.2	1892.41	1283.23	1216.23	1449.24	1354.86
ENSMUSG00000034762	Glis1	230587	GLIS family zinc finger 1	chr4:107434718-107635059	+	1.7371	0.345684	5.02511	5.03156e-07	1.30577e-05	Yes	OK	17.5054	4.9859	26.8951	6.68151	5.68882	2.58738	36.6636	27.8363	22.8053	20.2752
ENSMUSG00000038738	Shank1	243961	SH3/ankyrin domain gene 1	chr7:44310263-44358353	+	1.32714	0.264253	5.02222	5.10785e-07	1.323e-05	Yes	OK	215.321	104.042	298.78	75.7238	142.221	94.1806	252.063	391.85	164.786	386.421
ENSMUSG00000071180	Smim15	75616	small integral membrane protein 15	chr13:108044473-108049146	+	-0.871042	0.173513	-5.02005	5.16584e-07	1.33544e-05	Yes	OK	215.137	295.904	154.562	335.189	294.302	258.221	160.403	117.769	189.799	150.275
ENSMUSG00000038708	Golga4	54214	golgi autoantigen, golgin subfamily a, 4	chr9:118506317-118582519	+	0.645712	0.128676	5.01813	5.21771e-07	1.34625e-05	Yes	OK	648.21	488.604	767.916	486.08	442.59	537.14	701.192	710.897	765.08	894.493
ENSMUSG00000004558	Ndrg2	29811	N-myc downstream regulated gene 2	chr14:51905270-51913488	-	-1.04039	0.207384	-5.01673	5.25575e-07	1.35346e-05	Yes	OK	1576.8	2281.73	1048.1	3061.8	2255.81	1527.59	1049.5	880.057	984.305	1278.53
ENSMUSG00000057110	Cntrl	26920	centriolin	chr2:35109491-35178822	+	0.759414	0.151432	5.01487	5.30695e-07	1.36402e-05	Yes	OK	347.076	242.616	425.42	212.138	241.965	273.745	522.457	351.166	389.161	438.898
ENSMUSG00000022091	Sorbs3	20410	sorbin and SH3 domain containing 3	chr14:70180467-70207671	-	0.946274	0.188886	5.00976	5.44968e-07	1.39802e-05	Yes	OK	126.609	79.9442	161.608	87.9732	61.8186	90.0408	164.986	188.431	152.28	140.734
ENSMUSG00000037032	Apbb1	11785	amyloid beta (A4) precursor protein-binding, family B, member 1	chr7:105558482-105568777	-	-0.616873	0.123167	-5.00844	5.48738e-07	1.405e-05	Yes	OK	435.796	552.171	348.515	588.53	546.886	521.098	279.56	374.72	379.597	360.183
ENSMUSG00000029439	Sfswap	231769	splicing factor, suppressor of white-apricot homolog (Drosophila)	chr5:129501230-129571384	+	0.743206	0.148465	5.00595	5.55876e-07	1.42056e-05	Yes	OK	566.53	403.139	689.074	334.076	381.151	494.19	696.609	704.473	625.306	729.906
ENSMUSG00000030757	Zkscan2	210162	zinc finger with KRAB and SCAN domains 2	chr7:123478638-123500449	-	0.77747	0.15533	5.00527	5.57827e-07	1.42283e-05	Yes	OK	156.479	107.792	192.994	113.029	100.123	110.222	215.399	199.137	161.844	195.596
ENSMUSG00000066191	Anks6	75691	ankyrin repeat and sterile alpha motif domain containing 6	chr4:47015688-47057306	-	1.0094	0.201703	5.00441	5.60343e-07	1.42653e-05	Yes	OK	84.0061	50.0968	109.438	56.7928	45.8898	47.6078	146.655	83.509	107.405	100.183
ENSMUSG00000024084	Qpct	70536	glutaminyl-peptide cyclotransferase (glutaminyl cyclase)	chr17:79051905-79090378	+	-1.10321	0.220478	-5.00371	5.62379e-07	1.429e-05	Yes	OK	281.546	418.297	178.982	553.452	432.351	269.088	132.906	214.126	197.155	171.743
ENSMUSG00000022952	Runx1	12394	runt related transcription factor 1	chr16:92601465-92826074	-	1.21694	0.243235	5.00315	5.64001e-07	1.43041e-05	Yes	OK	146.661	78.4146	197.846	90.7572	45.1313	99.3554	183.318	167.018	253.801	187.247
ENSMUSG00000031647	Mfap3l	71306	microfibrillar-associated protein 3-like	chr8:60655103-60676731	+	-0.852911	0.170719	-4.99599	5.85347e-07	1.47958e-05	Yes	OK	194.793	268.412	139.579	302.895	271.547	230.794	114.574	134.899	172.879	135.963
ENSMUSG00000039934	Gsap	212167	gamma-secretase activating protein	chr5:21186266-21291701	+	0.716786	0.143475	4.99591	5.85599e-07	1.47958e-05	Yes	OK	541.023	391.138	653.436	427.617	327.676	418.121	705.775	537.455	696.664	673.852
ENSMUSG00000000197	Nalcn	338370	sodium leak channel, non-selective	chr14:123276640-123627144	-	-0.994267	0.19927	-4.98955	6.05214e-07	1.52626e-05	Yes	OK	368.589	525.876	250.623	728.285	414.146	435.197	261.228	207.702	269.985	263.577
ENSMUSG00000029632	Ndufa4	17992	NADH dehydrogenase (ubiquinone) 1 alpha subcomplex, 4	chr6:11900372-11907446	-	-0.649816	0.130277	-4.98794	6.10264e-07	1.5358e-05	Yes	OK	330.842	417.536	265.821	437.639	440.315	374.653	288.726	269.798	272.192	232.568
ENSMUSG00000037419	Endod1	71946	endonuclease domain containing 1	chr9:14353989-14381242	-	-0.787364	0.157864	-4.98762	6.11292e-07	1.5358e-05	Yes	OK	240.408	320.671	180.211	379.176	309.093	273.745	164.986	186.289	169.2	200.366
ENSMUSG00000004562	Arhgef40	268739	Rho guanine nucleotide exchange factor (GEF) 40	chr14:51984832-52006247	+	0.707088	0.141803	4.98642	6.15078e-07	1.54242e-05	Yes	OK	1071.08	776.905	1291.7	816.815	619.703	894.199	1356.55	1366.12	1230.01	1214.13
ENSMUSG00000047242	Taf9b	407786	TATA-box binding protein associated factor 9B	chrX:106206873-106221158	-	-1.04168	0.209051	-4.98293	6.26293e-07	1.5676e-05	Yes	OK	254.888	368.699	169.53	477.728	375.842	252.528	192.484	130.617	186.856	168.165
ENSMUSG00000029250	Polr2b	231329	polymerase (RNA) II (DNA directed) polypeptide B	chr5:77310483-77349328	+	-0.656835	0.131849	-4.98173	6.30172e-07	1.57437e-05	Yes	OK	615.995	788.878	486.333	731.625	879.492	755.515	417.049	456.088	551.005	521.191
ENSMUSG00000078302	Foxd1	15229	forkhead box D1	chr13:98354244-98356705	+	1.89326	0.380136	4.98048	6.34282e-07	1.58169e-05	Yes	OK	11.7792	2.50288	18.7365	2.78396	2.65478	2.0699	4.58295	34.2601	20.5983	15.5045
ENSMUSG00000014158	Trpv4	63873	transient receptor potential cation channel, subfamily V, member 4	chr5:114622153-114658421	-	1.33596	0.268277	4.97977	6.36585e-07	1.58448e-05	Yes	OK	46.7238	22.0519	65.2277	23.9421	20.4798	21.734	91.6591	32.1189	69.1514	67.9815
ENSMUSG00000029635	Cdk8	264064	cyclin-dependent kinase 8	chr5:146231674-146302874	+	0.877521	0.176241	4.97909	6.38838e-07	1.58714e-05	Yes	OK	368.743	245.659	461.056	187.639	253.342	295.996	352.888	483.924	467.14	540.274
ENSMUSG00000026648	Dclre1c	227525	DNA cross-link repair 1C	chr2:3424130-3461116	+	1.04434	0.209828	4.97711	6.45408e-07	1.60049e-05	Yes	OK	71.5806	43.1602	92.8959	43.4298	37.9255	48.1253	91.6591	74.944	90.4854	114.495
ENSMUSG00000004815	Dgkq	110524	diacylglycerol kinase, theta	chr5:108647043-108660769	-	0.76633	0.154059	4.97425	6.54997e-07	1.62127e-05	Yes	OK	126.493	88.1712	155.234	83.5189	88.3664	92.6282	160.403	164.877	144.188	151.468
ENSMUSG00000081769	Gm12216	622459	predicted gene 12216	chr11:53785488-53859256	-	1.84696	0.371419	4.97271	6.60222e-07	1.63119e-05	Yes	OK	18.7152	3.93654	29.7993	5.56793	4.1718	2.0699	59.5784	14.9888	18.3913	26.2385
ENSMUSG00000026307	Scly	50880	selenocysteine lyase	chr1:91298337-91321080	+	0.914599	0.183981	4.97116	6.65527e-07	1.64126e-05	Yes	OK	109.371	69.3469	139.389	59.02	78.1265	70.8942	174.152	111.345	136.096	135.963
ENSMUSG00000029571	Tmem106b	71900	transmembrane protein 106B	chr6:13069758-13089269	+	-0.980351	0.197277	-4.9694	6.71592e-07	1.65017e-05	Yes	OK	892.633	1267.17	611.729	1769.49	1090.74	941.289	609.533	584.563	701.814	551.008
ENSMUSG00000036246	Gmip	78816	Gem-interacting protein	chr8:69808686-69821870	+	1.14461	0.230331	4.9694	6.71604e-07	1.65017e-05	Yes	OK	98.4202	54.2383	131.557	65.1447	43.2351	54.335	142.072	139.182	87.5428	157.431
ENSMUSG00000027490	E2f1	13555	E2F transcription factor 1	chr2:154559399-154569892	-	1.26496	0.254903	4.96252	6.9585e-07	1.70496e-05	Yes	OK	61.024	30.372	84.013	18.9309	33.3744	38.8107	91.6591	100.639	75.7723	67.9815
ENSMUSG00000072964	Bhlhb9	70237	basic helix-loop-helix domain containing, class B9	chrX:135885850-135891081	+	-0.587958	0.118484	-4.96235	6.96449e-07	1.70496e-05	Yes	OK	432.397	537.207	353.789	515.59	548.023	548.007	343.722	385.426	375.919	310.091
ENSMUSG00000028804	Csmd2	329942	CUB and Sushi multiple domains 2	chr4:127988043-128567656	+	0.894149	0.180321	4.95866	7.09811e-07	1.73153e-05	Yes	OK	1170.06	765.908	1473.18	907.572	511.994	878.157	1439.05	1528.86	1406.57	1518.25
ENSMUSG00000031930	Wwp2	66894	WW domain containing E3 ubiquitin protein ligase 2	chr8:107436397-107558595	+	1.14829	0.231573	4.95864	7.09886e-07	1.73153e-05	Yes	OK	387.141	215.567	515.821	226.615	231.725	188.361	485.793	306.2	478.175	793.117
ENSMUSG00000043430	Psapl1	76943	prosaposin-like 1	chr5:36204020-36206567	+	1.86675	0.37667	4.95593	7.19855e-07	1.75265e-05	Yes	OK	10.9529	2.46357	17.3199	1.11359	2.65478	3.62233	9.16591	23.5538	19.8626	16.6972
ENSMUSG00000014778	Fhod1	234686	formin homology 2 domain containing 1	chr8:105329159-105347970	-	1.12505	0.227318	4.94924	7.45029e-07	1.81065e-05	Yes	OK	61.9881	34.6516	82.4906	38.9755	26.1686	38.8107	100.825	66.379	81.6576	81.1007
ENSMUSG00000010461	Eya4	14051	EYA transcriptional coactivator and phosphatase 4	chr10:23104167-23349903	-	1.49881	0.302887	4.9484	7.48242e-07	1.81516e-05	Yes	OK	41.6849	17.4495	59.8614	26.726	16.308	9.31457	54.9955	42.8251	67.6801	73.9448
ENSMUSG00000032596	Uba7	74153	ubiquitin-like modifier activating enzyme 7	chr9:107975566-107984056	+	1.44211	0.291931	4.93991	7.81594e-07	1.89264e-05	Yes	OK	82.7201	34.8596	118.615	51.2249	25.4101	27.9437	192.484	79.2265	78.7149	124.036
ENSMUSG00000027865	Gdap2	14547	ganglioside-induced differentiation-associated-protein 2	chr3:100162462-100206989	+	-0.766528	0.15522	-4.93833	7.87964e-07	1.90462e-05	Yes	OK	134.631	177.694	102.334	177.617	184.697	170.767	96.242	109.204	94.1637	109.724
ENSMUSG00000097471	5830432E09Rik	67765	RIKEN cDNA 5830432E09 gene	chr7:135648456-135652314	-	1.34395	0.272254	4.93639	7.95836e-07	1.92019e-05	Yes	OK	38.8214	18.5626	54.0155	21.7149	13.2739	20.699	64.1614	38.5426	63.2662	50.0916
ENSMUSG00000030246	Ldhb	16832	lactate dehydrogenase B	chr6:142490248-142507957	-	-0.758018	0.153589	-4.93535	8.00067e-07	1.92692e-05	Yes	OK	303.39	403.032	228.659	394.766	467.621	346.709	192.484	216.267	243.501	262.385
ENSMUSG00000020598	Nrcam	319504	neuronal cell adhesion molecule	chr12:44328884-44601846	+	-0.975403	0.1977	-4.93375	8.06654e-07	1.93775e-05	Yes	OK	921.989	1309.5	631.356	1759.46	1129.42	1039.61	568.286	498.913	737.861	720.365
ENSMUSG00000017485	Top2b	21974	topoisomerase (DNA) II beta	chr14:16365205-16430787	+	-0.54999	0.111479	-4.93356	8.07456e-07	1.93775e-05	Yes	OK	2335.94	2864.48	1939.53	3162.02	2760.22	2671.21	1956.92	1798.66	2081.16	1921.37
ENSMUSG00000022974	Paxbp1	67367	PAX3 and PAX7 binding protein 1	chr16:91014036-91044379	-	0.630098	0.127758	4.93195	8.14124e-07	1.95026e-05	Yes	OK	322.092	243.387	381.121	224.387	240.827	264.948	380.385	364.014	353.114	426.971
ENSMUSG00000035842	Ddx11	320209	DEAD/H (Asp-Glu-Ala-Asp/His) box helicase 11	chr17:66123519-66152168	+	1.15121	0.233542	4.92934	8.25061e-07	1.97293e-05	Yes	OK	211.855	116.084	283.683	70.7127	114.535	163.005	343.722	267.657	219.225	304.128
ENSMUSG00000041645	Ddx24	27225	DEAD (Asp-Glu-Ala-Asp) box polypeptide 24	chr12:103407975-103425867	-	-0.547206	0.111029	-4.9285	8.28628e-07	1.97792e-05	Yes	OK	487.147	596.71	404.975	545.657	612.117	632.356	403.3	396.132	399.46	421.008
ENSMUSG00000025876	Unc5a	107448	unc-5 netrin receptor A	chr13:54949431-55006018	+	0.913165	0.185351	4.92669	8.36322e-07	1.99274e-05	Yes	OK	105.699	67.8218	134.106	60.1336	72.4377	70.8942	123.74	171.301	122.119	119.266
ENSMUSG00000103948	4930594C11Rik	77633	G1 to S phase transition pseudogene	chr1:37485850-37488605	-	1.54301	0.313311	4.92484	8.44289e-07	2.00815e-05	Yes	OK	36.1403	13.8249	52.8768	9.46547	8.72286	23.2864	68.7443	42.8251	52.2314	47.7063
ENSMUSG00000005958	Ephb3	13845	Eph receptor B3	chr16:21204794-21223304	+	0.697882	0.141828	4.92064	8.62634e-07	2.04815e-05	Yes	OK	339.506	249.301	407.16	251.113	210.107	286.682	357.47	449.664	411.23	410.274
ENSMUSG00000040649	Rimklb	108653	ribosomal modification protein rimK-like family member B	chr6:122453608-122486305	-	0.880704	0.179323	4.91128	9.04819e-07	2.1445e-05	Yes	OK	325.315	214.258	408.607	252.227	244.619	145.928	412.466	398.274	403.874	419.815
ENSMUSG00000047909	Ankrd16	320816	ankyrin repeat domain 16	chr2:11777752-11790323	+	0.887467	0.180744	4.91008	9.10401e-07	2.15392e-05	Yes	OK	176.188	114.25	222.642	89.0868	123.258	130.404	270.394	194.854	236.88	188.44
ENSMUSG00000020935	Dcakd	68087	dephospho-CoA kinase domain containing	chr11:102994055-103017147	-	0.675295	0.137544	4.90965	9.12384e-07	2.1548e-05	Yes	OK	211.464	156.586	252.622	141.425	155.495	172.837	233.731	278.363	257.479	240.917
ENSMUSG00000047187	Rab2a	59021	RAB2A, member RAS oncogene family	chr4:8535643-8607702	+	-0.522996	0.106574	-4.90735	9.23134e-07	2.17635e-05	Yes	OK	813.771	989.48	681.989	1060.13	987.201	921.107	673.694	674.496	729.768	649.998
ENSMUSG00000020385	Clk4	12750	CDC like kinase 4	chr11:51263113-51281770	+	0.599545	0.122407	4.89797	9.68316e-07	2.27886e-05	Yes	OK	369.701	283.419	434.412	272.272	289.751	288.234	472.044	361.872	461.255	442.476
ENSMUSG00000035725	Prkx	19108	protein kinase, X-linked	chrX:77762029-77795960	-	-0.653576	0.133476	-4.89658	9.75191e-07	2.28827e-05	Yes	OK	206.956	263.779	164.339	277.839	248.033	265.465	151.238	179.866	164.051	162.201
ENSMUSG00000075700	Selt	69227	selenoprotein T	chr3:58576657-58593546	+	-0.605797	0.123721	-4.89647	9.75733e-07	2.28827e-05	Yes	OK	696.452	868.318	567.553	948.218	829.81	826.927	591.201	614.541	582.638	481.834
ENSMUSG00000034164	Emid1	140703	EMI domain containing 1	chr11:5106265-5152222	-	1.13347	0.231518	4.89581	9.79034e-07	2.292e-05	Yes	OK	681.246	380.824	906.563	535.634	212.003	394.834	994.501	997.826	743.01	890.915
ENSMUSG00000040054	Baz2a	116848	bromodomain adjacent to zinc finger domain, 2A	chr10:128092782-128129303	+	0.741434	0.151454	4.89544	9.80862e-07	2.29227e-05	Yes	OK	550.668	392.741	669.113	350.223	336.399	491.602	678.277	655.225	717.998	624.953
ENSMUSG00000037999	Arap2	212285	ArfGAP with RhoGAP domain, ankyrin repeat and PH domain 2	chr5:62602445-62766177	-	-0.594118	0.121414	-4.89334	9.9138e-07	2.31282e-05	Yes	OK	555.174	688.364	455.281	605.233	706.931	752.928	499.542	428.251	447.277	446.054
ENSMUSG00000042447	Mios	252875	missing oocyte, meiosis regulator, homolog (Drosophila)	chr6:8209226-8236273	+	-0.811783	0.165908	-4.89296	9.93286e-07	2.31323e-05	Yes	OK	224.906	304.965	164.862	336.303	313.644	264.948	151.238	134.899	201.569	171.743
ENSMUSG00000062169	Cnih4	98417	cornichon family AMPA receptor auxiliary protein 4	chr1:181150930-181168994	+	-0.693238	0.141758	-4.89029	1.00685e-06	2.34076e-05	Yes	OK	239.704	309.475	187.375	269.488	313.265	345.674	174.152	199.137	185.385	190.825
ENSMUSG00000032782	Cntrob	216846	centrobin, centrosomal BRCA2 interacting protein	chr11:69299495-69323873	-	0.891556	0.182343	4.88946	1.01113e-06	2.34664e-05	Yes	OK	163.497	105.348	207.109	87.4164	103.916	124.712	229.148	239.821	166.258	193.211
ENSMUSG00000051451	Crebzf	233490	CREB/ATF bZIP transcription factor	chr7:90442780-90448043	+	0.734098	0.150178	4.8882	1.01761e-06	2.35759e-05	Yes	OK	268.931	192.304	326.401	178.73	172.561	225.62	316.224	346.884	284.698	357.797
ENSMUSG00000032324	Tspan3	56434	tetraspanin 3	chr9:56135883-56161070	-	-0.747215	0.152874	-4.88778	1.0198e-06	2.35858e-05	Yes	OK	1280.19	1683.33	977.83	2080.73	1480.99	1488.26	843.264	1053.5	1055.66	958.897
ENSMUSG00000044471	Lncpint	232685	long non-protein coding RNA, Trp53 induced transcript	chr6:31093562-31218474	-	1.02841	0.210437	4.88701	1.02381e-06	2.36376e-05	Yes	OK	125.402	76.1884	162.313	57.9064	65.6111	105.048	142.072	162.736	175.086	169.357
ENSMUSG00000028838	Extl1	56219	exostoses (multiple)-like 1	chr4:134356372-134372547	-	1.46713	0.300241	4.88651	1.02641e-06	2.36568e-05	Yes	OK	105.703	44.8122	151.371	81.2917	28.8234	24.3214	142.072	128.475	150.073	184.862
ENSMUSG00000033544	Angptl1	72713	angiopoietin-like 1	chr1:156839022-156861079	+	1.52598	0.312314	4.88603	1.0289e-06	2.36736e-05	Yes	OK	34.1327	13.3654	49.7081	21.7149	10.6191	7.76214	59.5784	47.1076	55.174	36.9724
ENSMUSG00000056596	Trnp1	69539	TMF1-regulated nuclear protein 1	chr4:133491099-133498550	-	-1.02573	0.210032	-4.88369	1.04117e-06	2.39149e-05	Yes	OK	129.04	184.634	87.3443	240.534	142.6	170.767	100.825	83.509	77.9793	87.064
ENSMUSG00000028879	Stx12	100226	syntaxin 12	chr4:132854063-132884458	-	-0.594586	0.121802	-4.88158	1.05237e-06	2.41305e-05	Yes	OK	672.385	840.061	546.628	861.358	856.737	802.088	494.959	595.269	612.064	484.219
ENSMUSG00000062822	4833420G17Rik	67392	RIKEN cDNA 4833420G17 gene	chr13:119462758-119486117	+	0.727605	0.149117	4.87944	1.06389e-06	2.4353e-05	Yes	OK	230.311	164.011	280.035	146.993	193.42	151.62	311.641	250.527	272.927	285.045
ENSMUSG00000029168	Dpysl5	65254	dihydropyrimidinase-like 5	chr5:30711894-30799369	+	1.08962	0.223371	4.87806	1.07136e-06	2.44678e-05	Yes	OK	67.6802	39.9641	88.4672	47.8842	40.9595	31.0486	68.7443	85.6503	89.7497	109.724
ENSMUSG00000041757	Plekha6	240753	pleckstrin homology domain containing, family A member 6	chr1:133246096-133303435	+	0.938026	0.192308	4.87773	1.07315e-06	2.44678e-05	Yes	OK	202.423	130.266	256.541	174.833	108.846	107.118	215.399	256.951	260.421	293.394
ENSMUSG00000025964	Adam23	23792	a disintegrin and metallopeptidase domain 23	chr1:63445890-63596101	+	0.990616	0.203105	4.87737	1.07512e-06	2.44678e-05	Yes	OK	505.389	313.028	649.66	409.243	318.195	211.648	527.04	580.281	726.826	764.493
ENSMUSG00000025019	Lcor	212391	ligand dependent nuclear receptor corepressor	chr19:41549638-41559781	+	0.777364	0.159389	4.87717	1.07621e-06	2.44678e-05	Yes	OK	169.048	120.265	205.636	108.575	113.018	139.201	164.986	211.984	227.317	218.256
ENSMUSG00000097242	Gm16907	100504114	predicted gene, 16907	chr13:63289153-63297147	-	1.32469	0.271683	4.87586	1.08334e-06	2.45881e-05	Yes	OK	50.8707	25.3711	69.9954	26.1692	16.308	33.6359	54.9955	57.8139	86.0715	81.1007
ENSMUSG00000025979	Mob4	19070	MOB family member 4, phocein	chr1:55131244-55154899	+	-0.547218	0.112272	-4.87404	1.09337e-06	2.47738e-05	Yes	OK	363.38	445.662	301.669	458.24	457.002	421.743	297.892	291.211	297.94	319.632
ENSMUSG00000020257	Wdr82	77305	WD repeat domain containing 82	chr9:106170928-106191706	+	-0.458006	0.0939853	-4.87317	1.09824e-06	2.48421e-05	Yes	OK	797.873	944.382	687.992	912.583	972.03	948.534	714.941	685.202	667.238	684.585
ENSMUSG00000044783	A730008H23Rik	212427	RIKEN cDNA A730008H23 gene	chr1:88264827-88277557	-	0.865015	0.177784	4.86552	1.14154e-06	2.5778e-05	Yes	OK	1618.91	1075.05	2026.8	780.623	1049.4	1395.12	2245.65	1907.86	1873.71	2079.99
ENSMUSG00000044783	Hjurp	381280	Holliday junction recognition protein	chr1:88258855-88277579	-	0.865015	0.177784	4.86552	1.14154e-06	2.5778e-05	Yes	OK	1618.91	1075.05	2026.8	780.623	1049.4	1395.12	2245.65	1907.86	1873.71	2079.99
ENSMUSG00000045092	S1pr1	13609	sphingosine-1-phosphate receptor 1	chr3:115710432-115715055	-	-1.06775	0.219586	-4.86254	1.15888e-06	2.61256e-05	Yes	OK	132.273	191.881	87.5665	200.445	242.723	132.474	105.408	74.944	81.6576	88.2567
ENSMUSG00000020297	Nsg2	18197	neuron specific gene family member 2	chr11:32000418-32059211	+	-0.820746	0.168808	-4.86202	1.16193e-06	2.61504e-05	Yes	OK	933.217	1260.09	688.063	1549	1234.1	997.176	572.869	640.236	740.068	799.081
ENSMUSG00000102312	Pcdha3	192163	protocadherin alpha 3	chr18:36946206-37187657	+	1.67213	0.344007	4.86075	1.16939e-06	2.62741e-05	Yes	OK	23.8523	7.9864	35.7517	10.5791	8.72286	4.65728	32.0807	17.1301	54.4384	39.3577
ENSMUSG00000027809	Etfdh	66841	electron transferring flavoprotein, dehydrogenase	chr3:79603787-79628767	-	-0.75208	0.154758	-4.85971	1.17557e-06	2.63687e-05	Yes	OK	263.535	347.008	200.93	395.323	353.845	291.856	206.233	188.431	226.581	182.477
ENSMUSG00000032688	Malt1	240354	MALT1 paracaspase	chr18:65430996-65478792	+	1.38822	0.285706	4.85891	1.18035e-06	2.64089e-05	Yes	OK	67.1869	29.3873	95.5366	40.0891	29.9611	18.1117	155.82	62.0964	83.1289	81.1007
ENSMUSG00000029674	Limk1	16885	LIM-domain containing, protein kinase	chr5:134656038-134688590	-	0.786556	0.161886	4.85871	1.18152e-06	2.64089e-05	Yes	OK	245.043	170.618	300.862	160.356	182.801	168.697	247.48	398.274	271.456	286.238
ENSMUSG00000040351	Ankib1	70797	ankyrin repeat and IBR domain containing 1	chr5:3689998-3803124	-	-0.579966	0.119373	-4.85842	1.18328e-06	2.64089e-05	Yes	OK	703.793	873.535	576.486	951.558	895.421	773.627	527.04	633.812	573.81	571.283
ENSMUSG00000054252	Fgfr3	14184	fibroblast growth factor receptor 3	chr5:33721723-33737068	+	0.783615	0.161389	4.85545	1.20111e-06	2.67348e-05	Yes	OK	137.245	97.2563	167.237	100.223	96.3307	95.2156	151.238	141.323	183.178	193.211
ENSMUSG00000030059	Tmf1	232286	TATA element modulatory factor 1	chr6:97151949-97179124	-	-0.530287	0.109217	-4.85533	1.20188e-06	2.67348e-05	Yes	OK	649.79	791.762	543.311	811.804	840.05	723.432	540.789	537.455	573.81	521.191
ENSMUSG00000005312	Ubqln1	56085	ubiquilin 1	chr13:58176155-58215653	-	-0.489227	0.100794	-4.85375	1.21149e-06	2.6904e-05	Yes	OK	865.079	1038.03	735.368	966.035	1086.19	1061.86	747.022	713.038	765.815	715.595
ENSMUSG00000044117	2900011O08Rik	67254	RIKEN cDNA 2900011O08 gene	chr16:13986636-14101494	+	-0.98603	0.20334	-4.84917	1.23977e-06	2.74862e-05	Yes	OK	291.791	416.307	198.403	568.485	362.188	318.248	164.986	241.962	183.913	202.752
ENSMUSG00000028351	Brinp1	56710	bone morphogenic protein/retinoic acid inducible neural specific 1	chr4:68761371-68954397	-	-1.07429	0.221698	-4.84572	1.2615e-06	2.7922e-05	Yes	OK	402.683	588.828	263.074	879.175	444.866	442.442	302.475	239.821	236.88	273.119
ENSMUSG00000046591	Ticrr	77011	TOPBP1-interacting checkpoint and replication regulator	chr7:79660195-79698145	+	1.11546	0.230214	4.84533	1.26405e-06	2.79321e-05	Yes	OK	148.704	83.0289	197.96	50.6681	84.5738	113.845	247.48	182.007	184.649	177.706
ENSMUSG00000028128	F3	14066	coagulation factor III	chr3:121723536-121735052	+	-0.877546	0.181161	-4.84401	1.27246e-06	2.80716e-05	Yes	OK	397.285	548.316	284.012	400.891	613.255	630.803	215.399	323.33	307.503	289.816
ENSMUSG00000027286	Lrrc57	66606	leucine rich repeat containing 57	chr2:120604237-120609315	-	-0.90389	0.186723	-4.8408	1.29316e-06	2.84815e-05	Yes	OK	122.286	169.698	86.7268	206.57	158.149	144.376	87.0761	81.3678	89.0141	89.4493
ENSMUSG00000037235	Mxd4	17122	Max dimerization protein 4	chr5:34176579-34187710	-	-0.83655	0.172862	-4.83942	1.30219e-06	2.86333e-05	Yes	OK	778.939	1059.1	568.819	1212.14	812.743	1152.42	439.964	584.563	678.273	572.476
ENSMUSG00000043091	Tuba1c	22146	tubulin, alpha 1C	chr15:99029890-99038105	+	1.04318	0.215623	4.83799	1.31161e-06	2.8793e-05	Yes	OK	69.6651	41.3284	90.9176	34.5211	41.3388	48.1253	105.408	66.379	100.049	91.8346
ENSMUSG00000020864	Ankrd40	71452	ankyrin repeat domain 40	chr11:94328000-94341847	+	-0.597371	0.123497	-4.83714	1.31723e-06	2.88691e-05	Yes	OK	526.748	658.1	428.234	738.307	659.524	576.468	412.466	421.828	442.128	436.513
ENSMUSG00000060671	Atp8b2	54667	ATPase, class I, type 8B, member 2	chr3:89939480-89963332	-	0.659572	0.13639	4.83594	1.3252e-06	2.89964e-05	Yes	OK	389.577	290.828	463.639	260.022	270.409	342.052	421.632	511.76	461.99	459.173
ENSMUSG00000040990	Sh3kbp1	58194	SH3-domain kinase binding protein 1	chrX:159708600-159975920	+	-0.659613	0.136544	-4.83077	1.36009e-06	2.97112e-05	Yes	OK	457.597	586.743	360.737	667.037	508.96	584.23	316.224	351.166	379.597	395.962
ENSMUSG00000037692	Ahdc1	230793	AT hook, DNA binding motif, containing 1	chr4:133011505-133078110	+	0.969124	0.200871	4.82461	1.40278e-06	3.05938e-05	Yes	OK	390.528	244.775	499.842	226.615	174.457	333.255	403.3	586.704	477.439	531.925
ENSMUSG00000072235	Tuba1a	22142	tubulin, alpha 1A	chr15:98949846-98953501	-	-0.768894	0.159446	-4.82227	1.4193e-06	3.08803e-05	Yes	OK	1630.22	2160.63	1232.4	1828.51	2577.8	2075.6	962.42	1340.43	1375.67	1251.1
ENSMUSG00000022403	St13	70356	suppression of tumorigenicity 13	chr15:81365043-81399694	-	-0.545511	0.113127	-4.8221	1.42053e-06	3.08803e-05	Yes	OK	848.108	1037.02	706.422	1130.29	1058.12	922.66	737.856	665.931	700.342	721.558
ENSMUSG00000039470	Zdhhc2	70546	zinc finger, DHHC domain containing 2	chr8:40423814-40484842	+	-0.817567	0.169608	-4.82033	1.43324e-06	3.11062e-05	Yes	OK	864.627	1162.74	641.045	1449.33	1002.37	1036.5	687.443	537.455	758.459	580.824
ENSMUSG00000073147	5031425E22Rik	269630	RIKEN cDNA 5031425E22 gene	chr5:23431807-23434353	-	0.879847	0.182592	4.81865	1.44534e-06	3.13181e-05	Yes	OK	112.073	75.7897	139.286	79.0645	64.4733	83.8311	105.408	139.182	151.545	161.009
ENSMUSG00000033767	D930015E06Rik	229473	RIKEN cDNA D930015E06 gene	chr3:83898286-84040161	-	0.745775	0.154852	4.81607	1.46416e-06	3.16746e-05	Yes	OK	164.087	114.168	201.527	108.575	120.603	113.327	256.645	171.301	195.684	182.477
ENSMUSG00000016128	Stard13	243362	StAR-related lipid transfer (START) domain containing 13	chr5:151037514-151190193	-	0.832375	0.172918	4.81371	1.48157e-06	3.19996e-05	Yes	OK	665.385	451.904	825.495	363.029	414.146	578.538	728.69	794.406	784.207	994.676
ENSMUSG00000035799	Twist1	22160	twist basic helix-loop-helix transcription factor 1	chr12:33957670-33959831	+	1.66899	0.346743	4.81335	1.48424e-06	3.20057e-05	Yes	OK	20.7038	6.60126	31.2808	8.35189	2.65478	8.79709	41.2466	21.4126	33.8401	28.6238
ENSMUSG00000000085	Scmh1	29871	sex comb on midleg homolog 1	chr4:120405280-120530199	+	0.792222	0.164614	4.8126	1.48982e-06	3.20742e-05	Yes	OK	156.9	109.339	192.57	106.904	93.2967	127.817	187.901	177.724	187.592	217.064
ENSMUSG00000024614	Tmx3	67988	thioredoxin-related transmembrane protein 3	chr18:90510153-90543267	+	-0.622201	0.129309	-4.81176	1.4961e-06	3.21345e-05	Yes	OK	497.782	629.555	398.952	630.289	670.523	587.853	371.219	372.579	471.554	380.458
ENSMUSG00000051412	Vamp7	20955	vesicle-associated membrane protein 7	chrX_GL456233_random:10736-39191	-	-0.793124	0.164837	-4.81158	1.49742e-06	3.21345e-05	Yes	OK	141.071	187.957	105.906	188.753	201.764	173.354	114.574	98.4978	119.912	90.642
ENSMUSG00000042198	Chchd7	66433	coiled-coil-helix-coiled-coil-helix domain containing 7	chr4:3938887-3943525	+	1.43028	0.297281	4.81121	1.50021e-06	3.21429e-05	Yes	OK	39.7243	16.3598	57.2477	12.2494	23.8931	12.9369	87.0761	40.6839	55.9097	45.321
ENSMUSG00000013622	Atraid	381629	all-trans retinoic acid induced differentiation factor	chr5:31048639-31054633	+	-0.778522	0.161838	-4.81049	1.50562e-06	3.22072e-05	Yes	OK	166.921	226.329	122.365	237.75	229.07	212.165	77.9102	134.899	138.303	138.348
ENSMUSG00000090272	Mndal	100040462	myeloid nuclear differentiation antigen like	chr1:173857219-173880187	-	1.86962	0.388921	4.8072	1.5306e-06	3.26895e-05	Yes	OK	10.7912	1.73257	17.5852	2.78396	1.89627	0.517476	32.0807	10.7063	13.2418	14.3119
ENSMUSG00000038371	Sbf2	319934	SET binding factor 2	chr7:110308012-110614920	-	-0.467959	0.0973898	-4.80501	1.54745e-06	3.29967e-05	Yes	OK	1358.69	1620.26	1162.51	1522.83	1619.42	1718.54	1118.24	1186.26	1210.15	1135.41
ENSMUSG00000028657	Ppt1	19063	palmitoyl-protein thioesterase 1	chr4:122836226-122859175	+	-0.987696	0.20564	-4.80303	1.56281e-06	3.32713e-05	Yes	OK	471.18	669.633	322.34	938.195	613.255	457.449	357.47	310.482	289.848	331.559
ENSMUSG00000078622	Ccdc47	67163	coiled-coil domain containing 47	chr11:106199355-106216367	-	-0.564262	0.117561	-4.79976	1.58857e-06	3.3766e-05	Yes	OK	588.332	724	486.581	776.169	706.552	689.278	527.04	415.404	486.267	517.613
ENSMUSG00000027706	Sec62	69276	SEC62 homolog (S. cerevisiae)	chr3:30792875-30821263	+	-0.837473	0.174571	-4.79732	1.60802e-06	3.41253e-05	Yes	OK	522.792	709.45	382.798	916.481	673.177	538.693	362.053	355.449	404.609	409.082
ENSMUSG00000024393	Prrc2a	53761	proline-rich coiled-coil 2A	chr17:35149085-35164877	-	0.791562	0.165089	4.79476	1.62873e-06	3.45099e-05	Yes	OK	2768.83	1918.7	3406.42	1682.07	1581.87	2492.16	3290.56	3661.55	3435.5	3238.07
ENSMUSG00000022096	Hr	15460	hairless	chr14:70554055-70573548	+	0.60022	0.125261	4.79177	1.65318e-06	3.49727e-05	Yes	OK	644.442	491.538	759.12	423.162	501.375	550.077	843.264	740.875	731.975	720.365
ENSMUSG00000031668	Eif2ak3	13666	eukaryotic translation initiation factor 2 alpha kinase 3	chr6:70844514-70905241	+	-0.570729	0.119121	-4.79119	1.65798e-06	3.49865e-05	Yes	OK	449.859	559.638	367.525	526.169	551.437	601.307	316.224	391.85	399.46	362.568
ENSMUSG00000037712	Fermt2	218952	fermitin family member 2	chr14:45458791-45530065	-	-0.620325	0.129476	-4.79106	1.65906e-06	3.49865e-05	Yes	OK	1003.52	1266.64	806.171	1409.8	1251.16	1138.96	687.443	811.536	915.889	809.814
ENSMUSG00000063506	Arhgap22	239027	Rho GTPase activating protein 22	chr14:33216822-33369936	+	-1.36463	0.284863	-4.79049	1.66379e-06	3.50311e-05	Yes	OK	74.1042	120.575	39.2515	160.913	65.2318	135.579	41.2466	29.9776	40.4609	45.321
ENSMUSG00000105265	Sox2ot	320478	SOX2 overlapping transcript (non-protein coding)	chr3:34560380-34677993	+	0.620167	0.12956	4.78671	1.69534e-06	3.55836e-05	Yes	OK	267.556	204.344	314.965	224.387	198.73	189.914	311.641	289.07	344.286	314.862
ENSMUSG00000021302	Ggps1	14593	geranylgeranyl diphosphate synthase 1	chr13:14049789-14063488	-	-0.617855	0.129138	-4.78447	1.71438e-06	3.58708e-05	Yes	OK	243.919	309.634	194.632	309.02	318.195	301.689	174.152	184.148	216.282	203.944
ENSMUSG00000041684	Bivm	246229	basic, immunoglobulin-like variable motif containing	chr1:44119967-44144771	+	-0.764548	0.159894	-4.7816	1.7391e-06	3.62257e-05	Yes	OK	132.086	172.053	102.11	174.833	175.216	166.11	123.74	87.7915	91.9567	104.954
ENSMUSG00000013662	Atad1	67979	ATPase family, AAA domain containing 1	chr19:32672562-32712298	-	-0.651302	0.136211	-4.78157	1.73931e-06	3.62257e-05	Yes	OK	537.476	687.873	424.678	622.494	766.853	674.271	362.053	398.274	489.945	448.439
ENSMUSG00000007655	Cav1	12389	caveolin 1, caveolae protein	chr6:17307639-17341328	+	-1.09134	0.228239	-4.78155	1.73946e-06	3.62257e-05	Yes	OK	427.648	632.433	274.058	910.356	493.79	493.155	270.394	241.962	365.62	218.256
ENSMUSG00000073421	H2-Ab1	14961	histocompatibility 2, class II antigen A, beta 1	chr17:34263226-34269418	+	1.81987	0.380955	4.77714	1.77809e-06	3.69529e-05	Yes	OK	453.112	97.4662	719.846	135.301	70.1622	86.936	1329.06	282.646	503.187	764.493
ENSMUSG00000024158	Hagh	14651	hydroxyacyl glutathione hydrolase	chr17:24850666-24864450	+	-0.937527	0.196261	-4.77693	1.7799e-06	3.69529e-05	Yes	OK	75.5142	103.923	54.2073	100.223	109.605	101.943	64.1614	55.6727	49.2888	47.7063
ENSMUSG00000023885	Thbs2	21826	thrombospondin 2	chr17:14665499-14694262	-	-1.43426	0.300373	-4.77495	1.79755e-06	3.72584e-05	Yes	OK	74.7358	127.258	35.3439	155.345	87.2286	139.201	22.9148	17.1301	59.5879	41.743
ENSMUSG00000029802	Abcg2	26357	ATP-binding cassette, sub-family G (WHITE), member 2	chr6:58596671-58692451	+	-0.659217	0.138076	-4.77431	1.80326e-06	3.72584e-05	Yes	OK	336.175	424.265	270.108	449.888	377.359	445.547	311.641	278.363	262.628	227.798
ENSMUSG00000024219	Anks1	224650	ankyrin repeat and SAM domain containing 1	chr17:27909305-28062779	+	0.766718	0.160596	4.77419	1.80434e-06	3.72584e-05	Yes	OK	222.128	157.941	270.268	147.55	138.428	187.844	224.565	271.94	268.514	316.054
ENSMUSG00000024330	Col11a2	12815	collagen, type XI, alpha 2	chr17:34039137-34066684	+	1.76383	0.369463	4.77403	1.80574e-06	3.72584e-05	Yes	OK	992.964	254.709	1546.66	484.966	117.19	161.97	1622.37	1248.35	1516.18	1799.72
ENSMUSG00000015968	Cacna1d	12289	calcium channel, voltage-dependent, L type, alpha 1D subunit	chr14:30039940-30353486	-	0.590204	0.123823	4.76652	1.87435e-06	3.86066e-05	Yes	OK	378.868	290.777	444.937	289.532	260.927	321.87	485.793	411.121	429.622	453.21
ENSMUSG00000063268	Parp10	671535	poly (ADP-ribose) polymerase family, member 10	chr15:76232994-76243440	-	1.50808	0.31641	4.76621	1.87725e-06	3.86066e-05	Yes	OK	86.4896	33.5776	126.173	45.1002	21.9968	33.6359	201.65	57.8139	79.4506	165.779
ENSMUSG00000028419	Chmp5	76959	charged multivesicular body protein 5	chr4:40948552-40965302	+	-0.707855	0.148524	-4.76594	1.87973e-06	3.86066e-05	Yes	OK	281.111	366.194	217.299	420.378	347.018	331.185	215.399	184.148	244.237	225.412
ENSMUSG00000021987	Mtmr6	219135	myotubularin related protein 6	chr14:60265204-60302371	+	-0.706859	0.148339	-4.76515	1.88716e-06	3.86997e-05	Yes	OK	516.957	670.754	401.61	790.089	636.39	585.783	412.466	334.036	447.277	412.66
ENSMUSG00000001151	Pcnt	18541	pericentrin (kendrin)	chr10:76351253-76442912	-	0.787427	0.165265	4.76465	1.89184e-06	3.87364e-05	Yes	OK	436.86	301.812	538.146	252.784	266.616	386.037	618.699	490.348	497.302	546.237
ENSMUSG00000089281	Scarna6	100217415	small Cajal body-specific RNA 6	chr1:87784570-87784818	+	1.37572	0.28909	4.75882	1.94731e-06	3.98114e-05	Yes	OK	62.0028	27.0695	88.2027	29.51	24.2723	27.4262	132.906	81.3678	41.9323	96.6053
ENSMUSG00000036030	Prtg	235472	protogenin	chr9:72807273-72917307	+	0.972632	0.204459	4.7571	1.96396e-06	4.00905e-05	Yes	OK	88.9217	55.6195	113.898	59.02	63.3356	44.5029	100.825	130.617	128.739	95.4126
ENSMUSG00000026941	Mamdc4	381352	MAM domain containing 4	chr2:25563114-25571316	-	1.30762	0.274987	4.75521	1.98243e-06	4.04059e-05	Yes	OK	45.164	21.6083	62.8307	21.1581	13.6532	30.0136	73.3273	62.0964	51.4958	64.4035
ENSMUSG00000087259	2610035D17Rik	72386	RIKEN cDNA 2610035D17 gene	chr11:113043905-113201838	-	1.08318	0.227902	4.75281	2.00605e-06	4.08253e-05	Yes	OK	108.447	63.6841	142.02	83.5189	54.2335	53.3	91.6591	192.713	134.625	149.082
ENSMUSG00000042605	Atxn2	20239	ataxin 2	chr5:121711608-121814950	+	0.626376	0.132005	4.74509	2.08416e-06	4.23506e-05	Yes	OK	484.173	367.427	571.733	348.552	331.469	422.26	568.286	507.478	582.638	628.531
ENSMUSG00000056124	B4galt6	56386	UDP-Gal:betaGlcNAc beta 1,4-galactosyltransferase, polypeptide 6	chr18:20684598-20746404	-	-0.550606	0.116119	-4.74175	2.11879e-06	4.29889e-05	Yes	OK	381.174	467.783	316.217	505.568	467.242	430.54	311.641	316.906	311.917	324.403
ENSMUSG00000038884	A230050P20Rik	319278	RIKEN cDNA A230050P20 gene	chr9:20868641-20874307	+	0.92143	0.194406	4.73971	2.14019e-06	4.33576e-05	Yes	OK	118.252	73.5297	151.793	73.4966	72.0584	75.034	201.65	141.323	110.348	153.853
ENSMUSG00000048720	Tbc1d12	209478	TBC1D12: TBC1 domain family, member 12	chr19:38836578-38919923	+	-0.924086	0.195134	-4.73565	2.18353e-06	4.41687e-05	Yes	OK	259.851	362.117	183.151	478.285	347.777	260.29	192.484	169.159	176.557	194.403
ENSMUSG00000035152	Ap2b1	71770	adaptor-related protein complex 2, beta 1 subunit	chr11:83302696-83405033	+	-0.481179	0.101615	-4.73531	2.18718e-06	4.41757e-05	Yes	OK	1338.12	1604.93	1138.02	1702.67	1517.78	1594.34	1049.5	1203.39	1188.82	1110.36
ENSMUSG00000035513	Ntng2	171171	netrin G2	chr2:29194725-29248099	-	1.32218	0.279299	4.73392	2.20224e-06	4.4413e-05	Yes	OK	29.2449	13.6808	40.9179	15.5902	12.5154	12.9369	45.8295	47.1076	39.7253	31.0091
ENSMUSG00000004980	Hnrnpa2b1	53379	heterogeneous nuclear ribonucleoprotein A2/B1	chr6:51460434-51469894	-	0.692439	0.146312	4.73262	2.21637e-06	4.46262e-05	Yes	OK	2538.09	1851.97	3052.67	1555.12	1865.18	2135.62	3593.04	2957.08	2894.8	2765.77
ENSMUSG00000024070	Prkd3	75292	protein kinase D3	chr17:78949404-79020816	-	-0.654833	0.138374	-4.73234	2.21948e-06	4.46262e-05	Yes	OK	909.729	1154.38	726.241	1349.67	1098.7	1014.77	824.932	633.812	743.746	702.475
ENSMUSG00000071054	Safb	224903	scaffold attachment factor B	chr17:56584981-56606294	+	0.784092	0.16573	4.73114	2.23268e-06	4.48243e-05	Yes	OK	537.613	372.481	661.463	296.214	354.983	466.246	701.192	710.897	553.947	679.815
ENSMUSG00000067212	H2-T23	15040	histocompatibility 2, T region locus 23	chr17:36029976-36032701	-	1.43503	0.303508	4.72817	2.26557e-06	4.54166e-05	Yes	OK	94.9647	40.4448	135.855	54.0089	25.4101	41.9156	187.901	51.3902	157.43	146.697
ENSMUSG00000056763	Cspp1	211660	centrosome and spindle pole associated protein 1	chr1:10038217-10136768	+	0.758569	0.160456	4.72757	2.27218e-06	4.5481e-05	Yes	OK	260.491	184.906	317.179	205.456	173.319	175.942	320.807	237.679	336.929	373.302
ENSMUSG00000040550	Otud6b	72201	OTU domain containing 6B	chr4:14809504-14826587	-	-0.756759	0.160149	-4.72534	2.2973e-06	4.59152e-05	Yes	OK	183.795	244.83	138.018	259.465	261.307	213.718	105.408	162.736	151.545	132.385
ENSMUSG00000031021	Tmem9b	56786	TMEM9 domain family, member B	chr7:109735835-109752263	-	-0.897807	0.190028	-4.72461	2.30555e-06	4.60113e-05	Yes	OK	322.409	450.424	226.398	573.496	387.599	390.177	151.238	256.951	264.835	232.568
ENSMUSG00000028525	Pde4b	18578	phosphodiesterase 4B, cAMP specific	chr4:102570059-102607262	+	-0.672415	0.142335	-4.72417	2.31054e-06	4.60423e-05	Yes	OK	689.373	886.008	541.898	1062.36	791.505	804.158	467.461	565.292	582.638	552.2
ENSMUSG00000100937	1700020D05Rik	75555	RIKEN cDNA 1700020D05 gene	chr19:5502768-5503787	-	1.76758	0.374253	4.72296	2.32437e-06	4.62491e-05	Yes	OK	10.374	2.47667	16.297	1.67038	2.65478	3.10486	18.3318	14.9888	13.9774	17.8899
ENSMUSG00000024472	Dcp2	70640	decapping mRNA 2	chr18:44380499-44424969	+	0.734532	0.155564	4.72173	2.33846e-06	4.64604e-05	Yes	OK	425.445	302.486	517.663	241.648	301.508	364.303	591.201	456.088	500.98	522.384
ENSMUSG00000032336	Nptn	20320	neuroplastin	chr9:58582239-58652879	+	-0.653476	0.138463	-4.7195	2.36426e-06	4.69034e-05	Yes	OK	699.957	892.623	555.458	990.534	948.896	738.438	517.874	513.902	578.224	611.833
ENSMUSG00000031910	Has3	15118	hyaluronan synthase 3	chr8:106870835-106882902	+	1.36218	0.288648	4.71918	2.368e-06	4.69081e-05	Yes	OK	32.5477	14.9119	45.7746	15.5902	9.48137	19.6641	54.9955	38.5426	47.8175	41.743
ENSMUSG00000042423	Fbrs	14123	fibrosin	chr7:127485220-127491513	+	0.886577	0.188023	4.71526	2.41401e-06	4.7749e-05	Yes	OK	200.118	131.488	251.591	127.505	96.71	170.25	238.314	269.798	234.674	263.577
ENSMUSG00000036093	Arl5a	75423	ADP-ribosylation factor-like 5A	chr2:52397950-52424874	-	-0.768637	0.163034	-4.71458	2.42204e-06	4.78371e-05	Yes	OK	777.363	1027.29	589.919	773.942	1181.38	1126.55	600.367	635.953	616.478	506.879
ENSMUSG00000103092	Pcdha5	12941	protocadherin alpha 5	chr18:36960439-37187657	+	1.52659	0.323953	4.71237	2.44853e-06	4.8289e-05	Yes	OK	30.5861	11.0973	45.2027	5.01113	13.2739	15.0068	64.1614	47.1076	39.7253	29.8164
ENSMUSG00000056234	Ncoa4	27057	nuclear receptor coactivator 4	chr14:32165788-32179855	+	1.0364	0.219965	4.71165	2.45717e-06	4.83882e-05	Yes	OK	64.575	40.1263	82.9116	43.9866	36.0292	40.3631	54.9955	81.3678	102.256	93.0273
ENSMUSG00000013160	Atp6v0d1	11972	ATPase, H+ transporting, lysosomal V0 subunit D1	chr8:105524469-105566040	-	-0.561706	0.119272	-4.70948	2.48353e-06	4.88355e-05	Yes	OK	435.383	539.962	356.948	551.781	574.95	493.155	316.224	355.449	384.011	372.109
ENSMUSG00000022568	Scrib	105782	scribbled planar cell polarity	chr15:76047162-76069784	-	0.869515	0.18474	4.70669	2.51766e-06	4.94341e-05	Yes	OK	579.204	383.364	726.083	333.519	349.294	467.281	627.865	989.261	615.742	671.466
ENSMUSG00000025159	Mms19	72199	MMS19 (MET18 S. cerevisiae)	chr19:41943706-41981136	-	0.720492	0.15314	4.70479	2.54132e-06	4.98254e-05	Yes	OK	240.516	172.657	291.411	148.664	168.01	201.298	311.641	256.951	271.456	325.596
ENSMUSG00000058638	Zfp110	65020	zinc finger protein 110	chr7:12834809-12850584	+	-0.680682	0.144701	-4.70405	2.55056e-06	4.99335e-05	Yes	OK	187.001	238.694	148.231	244.989	257.893	213.2	160.403	143.464	147.131	141.926
ENSMUSG00000044667	Plppr4	229791	phospholipid phosphatase related 4	chr3:117319145-117360876	-	-1.22365	0.260261	-4.70165	2.5807e-06	5.04498e-05	Yes	OK	107.826	165.726	64.4014	183.185	193.42	120.572	59.5784	85.6503	36.047	76.3301
ENSMUSG00000079547	H2-DMb1	14999	histocompatibility 2, class II, locus Mb1	chr17:34153190-34160229	+	1.54672	0.329105	4.69977	2.60459e-06	5.08426e-05	Yes	OK	46.6454	17.0858	68.8151	27.8396	10.9984	12.4194	105.408	29.9776	64.7375	75.1374
ENSMUSG00000071658	Gng3	14704	guanine nucleotide binding protein (G protein), gamma 3	chr19:8836928-8839246	-	-0.701723	0.14933	-4.69913	2.61273e-06	5.08961e-05	Yes	OK	315.697	410.052	244.931	434.298	438.798	357.058	201.65	299.776	255.272	223.027
ENSMUSG00000027109	Sp3	20687	trans-acting transcription factor 3	chr2:72936431-72980446	-	-0.568783	0.121044	-4.69896	2.61493e-06	5.08961e-05	Yes	OK	545.035	670.947	450.601	665.367	744.098	603.377	485.793	423.969	465.669	426.971
ENSMUSG00000002233	Rhoc	11853	ras homolog family member C	chr3:104789033-104794459	+	-0.484737	0.103173	-4.69827	2.6237e-06	5.09837e-05	Yes	OK	633.308	757.457	540.195	738.307	764.578	769.487	549.955	567.433	553.212	490.182
ENSMUSG00000039830	Olig2	50913	oligodendrocyte transcription factor 2	chr16:91225549-91228677	+	-0.692484	0.147399	-4.69801	2.62704e-06	5.09837e-05	Yes	OK	1758.68	2268.07	1376.65	2727.17	1807.91	2269.13	1324.47	1321.16	1399.95	1461.01
ENSMUSG00000033917	Gde1	56209	glycerophosphodiester phosphodiesterase 1	chr7:118688557-118705738	-	-0.633488	0.134873	-4.69692	2.64116e-06	5.11835e-05	Yes	OK	302.753	382.183	243.181	379.176	417.56	349.814	219.982	284.787	225.846	242.109
ENSMUSG00000024597	Slc12a2	20496	solute carrier family 12, member 2	chr18:57878677-57946821	+	-0.714309	0.152213	-4.69283	2.69446e-06	5.21131e-05	Yes	OK	1113.79	1453.41	859.066	1546.21	1341.8	1472.22	618.699	946.435	1000.49	870.64
ENSMUSG00000021314	Amph	218038	amphiphysin	chr13:18948350-19150919	+	-0.594784	0.126748	-4.69265	2.69692e-06	5.21131e-05	Yes	OK	401.005	500.709	326.227	538.418	524.889	438.82	302.475	353.307	335.458	313.669
ENSMUSG00000007682	Dio2	13371	deiodinase, iodothyronine, type II	chr12:90724551-90739037	-	-1.39285	0.296885	-4.69155	2.71142e-06	5.2318e-05	Yes	OK	40.0171	63.4631	22.4326	82.9621	58.7845	48.6427	36.6636	19.2713	14.7131	19.0825
ENSMUSG00000021719	Rgs7bp	52882	regulator of G-protein signalling 7 binding protein	chr13:104947152-105054930	-	-0.734194	0.156541	-4.69009	2.73078e-06	5.26157e-05	Yes	OK	419.029	545.117	324.464	499.443	668.626	467.281	357.47	314.765	286.905	338.715
ENSMUSG00000034248	Slc25a37	67712	solute carrier family 25, member 37	chr14:69241850-69285103	-	0.804955	0.171702	4.68809	2.7577e-06	5.30521e-05	Yes	OK	130.582	91.0054	160.264	77.3942	87.9871	107.635	137.489	160.594	173.614	169.357
ENSMUSG00000028794	A3galt2	215493	alpha 1,3-galactosyltransferase 2 (isoglobotriaosylceramide synthase)	chr4:128759257-128769298	+	1.68862	0.360216	4.68782	2.76136e-06	5.30521e-05	Yes	OK	12.5753	3.68542	19.2427	2.22717	4.1718	4.65728	18.3318	17.1301	17.6557	23.8532
ENSMUSG00000078249	Hmga1-rs1	111241	high mobility group AT-hook I, related sequence 1	chr17:27556652-27563671	+	-1.87524	0.400139	-4.68647	2.77957e-06	5.33256e-05	Yes	OK	14.1248	31.1329	1.36879	7.2383	27.6856	58.4748	0	4.28251	0	1.19266
ENSMUSG00000021236	Entpd5	12499	ectonucleoside triphosphate diphosphohydrolase 5	chr12:84373875-84409029	-	-0.886722	0.189439	-4.68077	2.85806e-06	5.4753e-05	Yes	OK	216.135	299.744	153.428	379.733	251.446	268.053	137.489	158.453	185.385	132.385
ENSMUSG00000030400	Ercc2	13871	excision repair cross-complementing rodent repair deficiency, complementation group 2	chr7:19382038-19395692	+	0.706126	0.150944	4.67807	2.89582e-06	5.53971e-05	Yes	OK	147.833	107.761	177.887	114.142	96.3307	112.81	164.986	190.572	169.936	186.055
ENSMUSG00000031700	Gpt2	108682	glutamic pyruvate transaminase (alanine aminotransferase) 2	chr8:85492616-85527558	+	-1.003	0.214431	-4.67748	2.90422e-06	5.54784e-05	Yes	OK	1223.66	1753.69	826.139	2608.57	1278.09	1374.42	907.425	732.31	852.623	812.2
ENSMUSG00000027931	Npr1	18160	natriuretic peptide receptor 1	chr3:90450591-90465866	-	-1.27116	0.271913	-4.67487	2.94144e-06	5.61094e-05	Yes	OK	121.381	192.58	67.9814	142.539	221.485	213.718	27.4977	124.193	61.7949	58.4402
ENSMUSG00000079037	Prnp	19122	prion protein	chr2:131909927-131938436	+	-0.640751	0.137087	-4.67404	2.95327e-06	5.62549e-05	Yes	OK	1036.14	1317.44	825.166	1471.6	1287.95	1192.78	710.358	745.157	913.682	931.466
ENSMUSG00000027936	Crtc2	74343	CREB regulated transcription coactivator 2	chr3:90254280-90264125	+	0.918013	0.196436	4.67335	2.96323e-06	5.63646e-05	Yes	OK	94.8523	61.3779	119.958	53.4521	54.6127	76.069	105.408	139.182	124.325	110.917
ENSMUSG00000020527	Myo19	66196	myosin XIX	chr11:84880219-84911131	+	0.920023	0.196883	4.67293	2.9693e-06	5.63999e-05	Yes	OK	82.1323	51.7859	104.892	48.441	47.4069	59.5097	114.574	119.91	95.635	89.4493
ENSMUSG00000022751	Nit2	52633	nitrilase family, member 2	chr16:57156664-57167332	-	-0.885284	0.18959	-4.66946	3.01995e-06	5.72807e-05	Yes	OK	81.8051	113.168	58.283	104.12	113.776	121.607	59.5784	51.3902	62.5306	59.6329
ENSMUSG00000090386	Mir99ahg	77994	Mir99a and Mirlet7c-1 host gene (non-protein coding)	chr16:77329327-77558428	+	0.760331	0.162949	4.66607	3.07014e-06	5.80772e-05	Yes	OK	194.051	136.423	237.272	148.664	108.467	152.138	256.645	229.114	248.651	214.678
ENSMUSG00000021794	Glud1	14661	glutamate dehydrogenase 1	chr14:34310726-34345033	+	-0.499991	0.10716	-4.66586	3.07333e-06	5.80772e-05	Yes	OK	738.976	888.711	626.675	886.971	961.032	818.13	632.448	655.225	608.386	610.641
ENSMUSG00000059895	Ptp4a3	19245	protein tyrosine phosphatase 4a3	chr15:73723144-73758766	+	0.733367	0.157181	4.66575	3.07495e-06	5.80772e-05	Yes	OK	134.362	96.7964	162.536	92.4276	98.6063	99.3554	142.072	186.289	175.086	146.697
ENSMUSG00000022037	Clu	12759	clusterin	chr14:65968482-65981548	+	-1.1378	0.243913	-4.66476	3.08982e-06	5.82758e-05	Yes	OK	758.006	1141.7	470.237	1711.02	895.421	818.647	329.973	471.076	431.093	648.806
ENSMUSG00000048794	Cfap100	243538	cilia and flagella associated protein 100	chr6:90403735-90428480	-	1.45297	0.311765	4.66048	3.15478e-06	5.94172e-05	Yes	OK	37.2381	14.9948	53.9205	16.7038	13.2739	15.0068	82.4932	23.5538	40.4609	69.1741
ENSMUSG00000022261	Sdc2	15529	syndecan 2	chr15:32920722-33034721	+	-0.917076	0.196822	-4.65941	3.17111e-06	5.96409e-05	Yes	OK	247.514	345.179	174.265	460.467	320.47	254.598	174.152	169.159	192.741	161.009
ENSMUSG00000042271	Nxt2	237082	nuclear transport factor 2-like export factor 2	chrX:142228176-142239700	+	-1.07356	0.230645	-4.6546	3.24614e-06	6.09665e-05	Yes	OK	192.015	285.017	122.263	394.209	264.72	196.123	96.242	111.345	157.43	124.036
ENSMUSG00000002486	Tchp	77832	trichoplein, keratin filament binding	chr5:114707778-114722327	+	0.90825	0.195287	4.65084	3.30589e-06	6.20017e-05	Yes	OK	84.8086	54.3528	107.65	46.2138	59.9223	56.9224	114.574	96.3566	95.635	124.036
ENSMUSG00000000420	Galnt1	14423	UDP-N-acetyl-alpha-D-galactosamine:polypeptide N-acetylgalactosaminyltransferase 1	chr18:24205343-24286816	+	-0.523763	0.112662	-4.64899	3.33556e-06	6.24512e-05	Yes	OK	555.524	675.815	465.307	636.971	664.455	726.019	472.044	443.24	504.658	441.283
ENSMUSG00000019528	Gyg	27357	glycogenin	chr3:20122083-20155116	-	-0.782071	0.168232	-4.64877	3.33919e-06	6.24512e-05	Yes	OK	172.177	226.409	131.503	232.739	214.658	231.829	174.152	87.7915	131.682	132.385
ENSMUSG00000029474	Rnf34	80751	ring finger protein 34	chr5:122850187-122868945	+	-0.73708	0.158609	-4.64715	3.3656e-06	6.28573e-05	Yes	OK	164.925	214.103	128.042	221.603	232.863	187.844	151.238	107.063	125.061	128.807
ENSMUSG00000040943	Tet2	214133	tet methylcytosine dioxygenase 2	chr3:133463676-133544390	-	0.573755	0.123487	4.64627	3.37996e-06	6.30376e-05	Yes	OK	565.917	439.168	660.978	459.354	397.08	461.071	714.941	561.009	664.295	703.668
ENSMUSG00000052456	Asna1	56495	arsA arsenite transporter, ATP-binding, homolog 1 (bacterial)	chr8:85017930-85025278	-	-0.71783	0.154526	-4.64537	3.39466e-06	6.32109e-05	Yes	OK	239.659	314.172	183.775	290.646	366.74	285.129	155.82	194.854	206.719	177.706
ENSMUSG00000021803	Cdhr1	170677	cadherin-related family member 1	chr14:37077848-37098311	-	-1.59146	0.342609	-4.64513	3.39869e-06	6.32109e-05	Yes	OK	18.8685	33.7764	7.68758	27.8396	43.9936	29.4961	4.58295	12.8475	7.35654	5.96329
ENSMUSG00000039741	Bahcc1	268515	BAH domain and coiled-coil containing 1	chr11:120232946-120292297	+	1.01421	0.21837	4.64448	3.40937e-06	6.33217e-05	Yes	OK	473.377	286.161	613.79	305.122	164.217	389.142	591.201	627.388	578.224	658.347
ENSMUSG00000029189	Sel1l3	231238	sel-1 suppressor of lin-12-like 3 (C. elegans)	chr5:53107082-53213452	-	-1.31124	0.282499	-4.64157	3.4578e-06	6.41321e-05	Yes	OK	76.443	123.121	41.4343	130.289	171.802	67.2719	32.0807	42.8251	41.9323	48.899
ENSMUSG00000102440	Pcdhga9	93717	protocadherin gamma subfamily A, 9	chr18:37736935-37841863	+	1.13969	0.245637	4.63975	3.48823e-06	6.4607e-05	Yes	OK	82.6449	46.7423	109.572	37.3051	35.65	67.2719	77.9102	113.487	122.854	124.036
ENSMUSG00000028675	Pnrc2	52830	proline-rich nuclear receptor coactivator 2	chr4:135870925-135873846	-	-0.640745	0.13812	-4.63906	3.50003e-06	6.46879e-05	Yes	OK	547.451	690.668	440.039	768.374	682.659	620.971	513.291	359.731	464.933	422.201
ENSMUSG00000029420	Rimbp2	231760	RIMS binding protein 2	chr5:128757787-128953486	-	0.781756	0.168521	4.63893	3.50226e-06	6.46879e-05	Yes	OK	148.286	103.59	181.808	111.915	104.674	94.1806	174.152	167.018	161.844	224.22
ENSMUSG00000039781	Cep131	12009	centrosomal protein 131	chr11:120064429-120086827	-	0.869528	0.187504	4.63738	3.52856e-06	6.5084e-05	Yes	OK	131.205	85.8638	165.211	84.0757	76.2302	97.2855	183.318	156.312	128.004	193.211
ENSMUSG00000006307	Kmt2b	75410	lysine (K)-specific methyltransferase 2B	chr7:30568854-30588726	-	0.911067	0.1966	4.63412	3.58459e-06	6.60264e-05	Yes	OK	544.667	351.269	689.716	287.862	268.133	497.812	659.945	785.841	654.732	658.347
ENSMUSG00000026104	Stat1	20846	signal transducer and activator of transcription 1	chr1:52119437-52161865	+	1.21864	0.263195	4.63018	3.65342e-06	6.72018e-05	Yes	OK	1270.17	657.54	1729.64	798.441	475.586	698.593	2658.11	862.926	1588.28	1809.26
ENSMUSG00000049470	Aff4	93736	AF4/FMR2 family, member 4	chr11:53350766-53421830	+	-0.553263	0.119524	-4.6289	3.67619e-06	6.75279e-05	Yes	OK	1816.3	2233.57	1503.35	2394.21	2031.67	2274.82	1457.38	1325.44	1632.42	1598.16
ENSMUSG00000054452	Aes	14797	amino-terminal enhancer of split	chr10:81559443-81566371	+	-0.578656	0.125035	-4.62794	3.69316e-06	6.77467e-05	Yes	OK	755.534	934.513	621.3	844.654	1042.95	915.933	618.699	648.801	551.005	666.696
ENSMUSG00000105076	A930003O13Rik	330052	RIKEN cDNA A930003O13 gene	chr5:22738910-22746884	-	0.912581	0.197275	4.62594	3.72898e-06	6.8219e-05	Yes	OK	104.495	68.0353	131.84	65.1447	54.6127	84.3486	114.574	149.888	141.245	121.651
ENSMUSG00000020740	Gga3	260302	golgi associated, gamma adaptin ear containing, ARF binding protein 3	chr11:115584254-115603916	-	0.843697	0.182384	4.62594	3.7291e-06	6.8219e-05	Yes	OK	170.802	114.95	212.691	125.835	83.4361	135.579	210.816	216.267	203.04	220.642
ENSMUSG00000022822	Abcc5	27416	ATP-binding cassette, sub-family C (CFTR/MRP), member 5	chr16:20331303-20426394	-	0.703729	0.152161	4.62489	3.74799e-06	6.84712e-05	Yes	OK	589.894	429.396	710.268	505.011	355.741	427.435	705.775	612.399	695.193	827.704
ENSMUSG00000016496	Cd274	60533	CD274 antigen	chr19:29367437-29388094	+	1.63645	0.35402	4.62247	3.79195e-06	6.91798e-05	Yes	OK	54.9669	16.9104	83.5092	18.9309	12.1362	19.6641	155.82	17.1301	72.8297	88.2567
ENSMUSG00000029478	Ncor2	20602	nuclear receptor co-repressor 2	chr5:125017152-125179214	-	1.07498	0.23303	4.61305	3.96808e-06	7.22946e-05	Yes	OK	1285.25	743.6	1691.48	616.926	454.727	1159.15	1617.78	1787.95	1627.27	1732.93
ENSMUSG00000038280	Ostm1	14628	osteopetrosis associated transmembrane protein 1	chr10:42678915-42702462	+	-0.656877	0.142421	-4.61223	3.98366e-06	7.24799e-05	Yes	OK	249.796	322.743	195.085	348.552	315.919	303.758	160.403	186.289	227.317	206.33
ENSMUSG00000040102	Klhl42	232539	kelch-like 42	chr6:147091074-147112778	+	-0.51074	0.110761	-4.61118	4.00395e-06	7.27502e-05	Yes	OK	329.79	397.346	279.123	403.118	386.84	402.079	293.309	276.222	271.456	275.504
ENSMUSG00000060550	H2-Q7	15018	histocompatibility 2, Q region locus 7	chr17:35439154-35443773	+	1.80643	0.391842	4.61009	4.02494e-06	7.30324e-05	Yes	OK	342.291	61.3501	552.997	26.726	38.3047	119.019	747.022	259.092	554.683	651.191
ENSMUSG00000038671	Arfrp1	76688	ADP-ribosylation factor related protein 1	chr2:181357689-181365404	-	0.768556	0.166839	4.60656	4.09383e-06	7.41819e-05	Yes	OK	130.318	90.5031	160.179	82.4053	84.5738	104.53	164.986	175.583	142.717	157.431
ENSMUSG00000026812	Tsc1	64930	tuberous sclerosis 1	chr2:28641232-28691172	+	0.577124	0.125303	4.60582	4.10844e-06	7.43462e-05	Yes	OK	358.156	279.686	417.008	283.407	254.48	301.171	389.551	389.709	420.058	468.714
ENSMUSG00000020994	Pnn	18949	pinin	chr12:59066918-59074017	+	0.531369	0.115405	4.60437	4.13715e-06	7.47646e-05	Yes	OK	387.991	304.82	450.369	286.191	313.644	314.625	504.125	426.11	415.644	455.595
ENSMUSG00000033909	Usp36	72344	ubiquitin specific peptidase 36	chr11:118259652-118290244	-	0.967751	0.210263	4.60258	4.17281e-06	7.53073e-05	Yes	OK	226.384	141.612	289.963	95.7683	135.015	194.054	233.731	325.471	281.02	319.632
ENSMUSG00000022658	Tagln3	56370	transgelin 3	chr16:45711229-45724531	-	-0.775124	0.168547	-4.59887	4.24787e-06	7.65589e-05	Yes	OK	273.65	360.579	208.453	341.871	437.66	302.206	219.982	229.114	173.614	211.1
ENSMUSG00000003778	Brd8	78656	bromodomain containing 8	chr18:34598614-34624863	-	0.449556	0.0977807	4.5976	4.27391e-06	7.69246e-05	Yes	OK	616.615	507.641	698.346	501.113	513.132	508.679	737.856	644.518	712.113	698.897
ENSMUSG00000027868	Tbx15	21384	T-box 15	chr3:99253759-99354260	+	1.55575	0.338445	4.59675	4.29128e-06	7.71336e-05	Yes	OK	18.9763	6.73704	28.1557	7.7951	5.68882	6.72719	36.6636	14.9888	22.8053	38.165
ENSMUSG00000020091	Eif4ebp2	13688	eukaryotic translation initiation factor 4E binding protein 2	chr10:61432496-61452669	-	0.970217	0.211115	4.59568	4.31349e-06	7.74289e-05	Yes	OK	756.085	468.236	971.971	394.209	332.607	677.894	1090.74	1081.33	841.588	874.218
ENSMUSG00000025321	Itgb8	320910	integrin beta 8	chr12:119162802-119238276	-	-0.807486	0.175974	-4.58867	4.46069e-06	7.9964e-05	Yes	OK	2068.57	2773.62	1539.78	3618.04	2267.57	2435.24	1649.86	1599.52	1632.42	1277.34
ENSMUSG00000030283	St8sia1	20449	ST8 alpha-N-acetyl-neuraminide alpha-2,8-sialyltransferase 1	chr6:142821540-142964452	-	0.788754	0.171964	4.58674	4.50219e-06	8.06001e-05	Yes	OK	667.913	463.787	821.007	544.543	367.119	479.7	682.86	1023.52	726.09	851.558
ENSMUSG00000025931	Paqr8	74229	progestin and adipoQ receptor family member VIII	chr1:20890621-20938756	+	-0.902812	0.196872	-4.58579	4.52282e-06	8.08612e-05	Yes	OK	460.498	641.794	324.526	658.686	774.059	492.637	233.731	349.025	288.376	426.971
ENSMUSG00000078922	Tgtp1	21822	T cell specific GTPase 1	chr11:48985328-48992246	-	1.80301	0.393247	4.58493	4.54145e-06	8.10639e-05	Yes	OK	12.3384	2.01838	20.0784	2.22717	2.27553	1.55243	36.6636	2.14126	17.6557	23.8532
ENSMUSG00000051550	Zfp579	68490	zinc finger protein 579	chr7:4992851-4996101	-	1.1907	0.259711	4.58471	4.54626e-06	8.10639e-05	Yes	OK	80.1778	42.5435	108.404	43.9866	24.6516	58.9923	100.825	132.758	92.6924	107.339
ENSMUSG00000036309	Skp1a	21402	S-phase kinase-associated protein 1A	chr11:52231994-52246858	+	-0.625535	0.136458	-4.58409	4.55971e-06	8.11956e-05	Yes	OK	711.458	892.207	575.896	1026.17	893.904	756.55	659.945	539.597	555.418	548.622
ENSMUSG00000039347	Atp6v0e2	76252	ATPase, H+ transporting, lysosomal V0 subunit E2	chr6:48537568-48541800	+	-0.553082	0.120697	-4.58239	4.59696e-06	8.17502e-05	Yes	OK	711.615	872.411	591.018	930.4	865.08	821.752	582.035	676.637	587.787	517.613
ENSMUSG00000037049	Smpd1	20597	sphingomyelin phosphodiesterase 1, acid lysosomal	chr7:105554359-105558389	+	-0.660534	0.144247	-4.57918	4.66798e-06	8.2903e-05	Yes	OK	280.803	361.514	220.269	403.118	325.401	356.024	169.569	256.951	224.374	230.183
ENSMUSG00000004455	Ppp1cc	19047	protein phosphatase 1, catalytic subunit, gamma isoform	chr5:122158278-122175269	+	1.24653	0.272316	4.57753	4.70509e-06	8.34515e-05	Yes	OK	76.1507	38.2178	104.6	23.9421	32.2367	58.4748	105.408	132.758	101.52	78.7154
ENSMUSG00000027956	Tmem144	70652	transmembrane protein 144	chr3:79813152-79842662	-	-1.11063	0.242725	-4.57568	4.74665e-06	8.39197e-05	Yes	OK	83.9715	123.738	54.1464	133.63	124.775	112.81	68.7443	55.6727	64.7375	27.4311
ENSMUSG00000020589	Fam49a	76820	family with sequence similarity 49, member A	chr12:12262138-12376361	+	-0.603936	0.13199	-4.57561	4.74827e-06	8.39197e-05	Yes	OK	574.46	715.825	468.437	711.581	802.503	633.391	508.708	462.511	495.831	406.696
ENSMUSG00000037013	Ss18	268996	synovial sarcoma translocation, Chromosome 18	chr18:14625628-14682914	-	-0.533389	0.116574	-4.57552	4.75029e-06	8.39197e-05	Yes	OK	441.527	542.533	365.772	536.748	553.712	537.14	339.139	327.612	397.989	398.348
ENSMUSG00000068036	Afdn	17356	afadin, adherens junction formation factor	chr17:13760540-13905794	+	0.516146	0.11283	4.57456	4.77214e-06	8.41946e-05	Yes	OK	637.064	509.254	732.922	502.784	521.476	503.504	765.353	623.106	758.459	784.769
ENSMUSG00000034118	Tpst1	22021	protein-tyrosine sulfotransferase 1	chr5:130079369-130135733	+	-0.683721	0.149598	-4.57039	4.86824e-06	8.57738e-05	Yes	OK	196.235	255.814	151.55	244.432	261.686	261.325	105.408	186.289	161.844	152.66
ENSMUSG00000042978	Sbk1	104175	SH3-binding kinase 1	chr7:126272618-126294999	+	-0.664297	0.145357	-4.57012	4.87446e-06	8.57738e-05	Yes	OK	607.706	774.882	482.323	812.36	838.533	673.754	449.13	597.411	435.507	447.247
ENSMUSG00000031822	Gse1	382034	genetic suppressor element 1, coiled-coil protein	chr8:120537408-120581383	+	1.10834	0.242632	4.56797	4.9246e-06	8.65425e-05	Yes	OK	163.399	92.2148	216.787	57.3496	76.9887	142.306	210.816	214.126	200.098	242.109
ENSMUSG00000027698	Nceh1	320024	neutral cholesterol ester hydrolase 1	chr3:27183003-27244911	+	-0.695393	0.152265	-4.56699	4.94788e-06	8.68375e-05	Yes	OK	301.672	390.852	234.787	460.467	391.77	320.318	215.399	244.103	243.501	236.146
ENSMUSG00000025451	Paip1	218693	polyadenylate binding protein-interacting protein 1	chr13:119428599-119460323	+	-0.598838	0.131149	-4.56608	4.96928e-06	8.70991e-05	Yes	OK	429.309	532.303	352.062	529.51	599.602	467.798	398.717	329.754	339.872	339.907
ENSMUSG00000025066	Sfr1	67788	SWI5 dependent recombination repair 1	chr19:47731755-47735588	+	-0.706642	0.154772	-4.56569	4.97846e-06	8.71458e-05	Yes	OK	365.591	477.254	281.844	512.249	528.302	391.212	219.982	321.189	302.354	283.853
ENSMUSG00000029417	Cxcl9	17329	chemokine (C-X-C motif) ligand 9	chr5:92321330-92328079	-	1.79251	0.392868	4.56263	5.05165e-06	8.83115e-05	Yes	OK	26.6938	4.67893	43.2049	7.7951	4.1718	2.0699	68.7443	4.28251	29.4261	70.3668
ENSMUSG00000029106	Add1	11518	adducin 1 (alpha)	chr5:34573663-34632308	+	-0.491347	0.107744	-4.5603	5.10807e-06	8.91815e-05	Yes	OK	1250.31	1503.4	1060.5	1644.77	1511.71	1353.72	1031.16	1072.77	1096.86	1041.19
ENSMUSG00000040033	Stat2	20847	signal transducer and activator of transcription 2	chr10:128270575-128292849	+	0.840566	0.184447	4.55721	5.18373e-06	9.03846e-05	Yes	OK	211.44	141.338	264.017	148.107	134.635	141.271	316.224	177.724	241.294	320.825
ENSMUSG00000004798	Ulk2	29869	unc-51 like kinase 2	chr11:61775597-61855092	-	-0.781293	0.171488	-4.55598	5.21425e-06	9.07985e-05	Yes	OK	482.652	643.212	362.233	840.2	559.022	530.413	343.722	364.014	396.517	344.678
ENSMUSG00000030168	Adipor2	68465	adiponectin receptor 2	chr6:119353149-119417483	-	-0.496931	0.109103	-4.55472	5.24556e-06	9.1225e-05	Yes	OK	469.244	565.969	396.701	542.316	579.122	576.468	366.636	438.958	403.138	378.072
ENSMUSG00000000282	Mnt	17428	max binding protein	chr11:74830923-74845725	+	0.988909	0.217166	4.5537	5.27105e-06	9.15494e-05	Yes	OK	115.196	69.2674	149.643	57.9064	57.2675	92.6282	197.067	130.617	145.659	125.229
ENSMUSG00000041375	Ccdc9	243846	coiled-coil domain containing 9	chr7:16275463-16284659	-	0.779394	0.17132	4.54936	5.38103e-06	9.33385e-05	Yes	OK	122.323	83.2759	151.609	80.7349	88.3664	80.7263	174.152	156.312	122.119	153.853
ENSMUSG00000022580	Rhpn1	14787	rhophilin, Rho GTPase binding protein 1	chr15:75704287-75714419	+	1.08342	0.238219	4.54799	5.41611e-06	9.38255e-05	Yes	OK	64.2128	36.6484	84.8861	45.657	28.0649	36.2233	87.0761	89.9328	64.7375	97.7979
ENSMUSG00000050896	Rtn4rl2	269295	reticulon 4 receptor-like 2	chr2:84871945-84886692	-	1.53989	0.338621	4.54752	5.42814e-06	9.39124e-05	Yes	OK	17.78	6.55315	26.2002	3.89755	6.44733	9.31457	22.9148	29.9776	31.6331	20.2752
ENSMUSG00000059602	Syn3	27204	synapsin III	chr10:86048745-86498896	-	0.997171	0.219409	4.5448	5.49864e-06	9.4813e-05	Yes	OK	84.509	50.3631	110.118	65.1447	42.4766	43.468	137.489	113.487	100.049	89.4493
ENSMUSG00000059273	Zc3h4	330474	zinc finger CCCH-type containing 4	chr7:16401195-16437696	+	0.649136	0.142833	4.54471	5.50116e-06	9.4813e-05	Yes	OK	515.521	384.444	613.829	334.632	374.704	443.994	591.201	728.027	567.189	568.898
ENSMUSG00000036095	Dgkb	217480	diacylglycerol kinase, beta	chr12:37880704-38633410	+	-1.16238	0.255767	-4.5447	5.50143e-06	9.4813e-05	Yes	OK	168.183	253.487	104.206	382.516	208.211	169.732	137.489	79.2265	86.8071	113.302
ENSMUSG00000063531	Sema3e	20349	sema domain, immunoglobulin domain (Ig), short basic domain, secreted, (semaphorin) 3E	chr5:14025275-14256689	+	1.37685	0.302998	4.54409	5.51729e-06	9.4964e-05	Yes	OK	69.9083	32.1809	98.204	43.4298	24.6516	28.4612	64.1614	51.3902	125.797	151.468
ENSMUSG00000022112	Gpc5	103978	glypican 5	chr14:115092214-116525192	+	-1.21048	0.266689	-4.53892	5.65427e-06	9.71969e-05	Yes	OK	234.147	359.216	140.346	566.815	262.444	248.389	197.067	102.78	108.877	152.66
ENSMUSG00000106379	Lhfpl3	269629	lipoma HMGIC fusion partner-like 3	chr5:22746192-23275597	+	-1.09166	0.240554	-4.53812	5.67578e-06	9.74415e-05	Yes	OK	2926.85	4335.14	1870.64	6718.26	3472.08	2815.07	2066.91	1601.66	2146.64	1667.34
ENSMUSG00000020255	D10Wsu102e	28109	DNA segment, Chr 10, Wayne State University 102, expressed	chr10:83360220-83368835	+	0.761144	0.167777	4.53665	5.71541e-06	9.79962e-05	Yes	OK	1126.6	791.918	1377.62	573.496	819.57	982.687	1374.89	1458.2	1403.63	1273.76
ENSMUSG00000035891	Cerk	223753	ceramide kinase	chr15:86139100-86186141	-	-0.573777	0.126615	-4.53167	5.85205e-06	0.000100211	Yes	OK	449.916	556.156	370.236	596.882	581.019	490.567	384.968	359.731	398.724	337.522
ENSMUSG00000060227	Casc4	319996	cancer susceptibility candidate 4	chr2:121866969-121936207	+	-0.681909	0.150529	-4.53007	5.89634e-06	0.00010084	Yes	OK	623.968	806.011	487.436	958.797	766.853	692.383	394.134	533.173	537.027	485.412
ENSMUSG00000027375	Mal	17153	myelin and lymphocyte protein, T cell differentiation protein	chr2:127633225-127656695	-	-1.37561	0.303744	-4.52887	5.93013e-06	0.000101289	Yes	OK	90.1682	148.519	46.4054	120.824	232.104	92.6282	32.0807	62.0964	29.4261	62.0182
ENSMUSG00000055373	Fut9	14348	fucosyltransferase 9	chr4:25609332-25800003	-	-0.616933	0.136279	-4.52698	5.98339e-06	0.000102068	Yes	OK	755.737	949.067	610.739	1118.6	932.209	796.396	614.116	595.269	590.73	642.842
ENSMUSG00000041515	Irf8	15900	interferon regulatory factor 8	chr8:120736357-120756692	+	0.850072	0.187996	4.52176	6.13279e-06	0.000104371	Yes	OK	401.029	266.95	501.588	237.75	201.384	361.716	572.869	456.088	459.784	517.613
ENSMUSG00000075028	Prdm11	100042784	PR domain containing 11	chr2:92974905-93046144	-	0.877145	0.193985	4.52172	6.13399e-06	0.000104371	Yes	OK	93.2954	59.5495	118.605	61.804	59.9223	56.9224	146.655	115.628	90.4854	121.651
ENSMUSG00000040690	Col16a1	107581	collagen, type XVI, alpha 1	chr4:130047839-130099277	+	1.02309	0.226349	4.51998	6.18453e-06	0.000105098	Yes	OK	2268.1	1357.13	2951.32	1311.8	796.815	1962.79	2621.45	3166.92	2902.89	3114.03
ENSMUSG00000037072	Sep15	93684	selenoprotein 15	chr3:144570426-144597676	+	-0.616193	0.136376	-4.51835	6.23241e-06	0.000105777	Yes	OK	1047.32	1320.11	842.728	1491.65	1322.46	1146.21	733.273	817.96	968.12	851.558
ENSMUSG00000027423	Snx5	69178	sorting nexin 5	chr2:144250123-144270572	-	-0.47677	0.105567	-4.51627	6.29375e-06	0.000106683	Yes	OK	696.64	833.68	593.859	880.289	836.257	784.494	582.035	605.976	630.455	556.971
ENSMUSG00000027639	Samhd1	56045	SAM domain and HD domain, 1	chr2:157097528-157135222	-	0.79146	0.175364	4.51325	6.38418e-06	0.000107943	Yes	OK	219.635	149.693	272.092	145.88	129.326	173.872	352.888	211.984	242.03	281.467
ENSMUSG00000027478	Dnmt3b	13436	DNA methyltransferase 3B	chr2:153649448-153687730	+	1.41084	0.312783	4.51059	6.46463e-06	0.000109165	Yes	OK	21.9818	9.20321	31.5657	10.0223	11.3776	6.20971	36.6636	29.9776	34.5757	25.0458
ENSMUSG00000006740	Kif5b	16573	kinesin family member 5B	chr18:6201004-6241524	-	-0.548205	0.121638	-4.50685	6.57984e-06	0.000110971	Yes	OK	1453.29	1774.4	1212.46	1816.81	1853.04	1653.34	1443.63	1104.89	1118.19	1183.12
ENSMUSG00000026289	Atg16l1	77040	autophagy related 16-like 1 (S. cerevisiae)	chr1:87756010-87792428	+	0.61955	0.137478	4.50654	6.58948e-06	0.000110993	Yes	OK	242.165	185.19	284.897	164.811	180.146	210.613	261.228	280.505	300.882	296.972
ENSMUSG00000059674	Cdh24	239096	cadherin-like 24	chr14:54631991-54641364	-	0.891492	0.197869	4.50547	6.62269e-06	0.000111413	Yes	OK	78.4247	51.7093	98.4612	49.5545	43.9936	61.5796	87.0761	102.78	97.8419	106.147
ENSMUSG00000045095	4930511A08Rik	78178	RIKEN cDNA 4930511A08 gene	chr6:94132922-94237442	-	0.544389	0.120844	4.50488	6.64104e-06	0.000111581	Yes	OK	833.53	653.847	968.292	697.104	571.537	692.9	1063.25	993.543	890.877	925.502
ENSMUSG00000045095	Magi1	14924	membrane associated guanylate kinase, WW and PDZ domain containing 1	chr6:93675452-94283917	-	0.544389	0.120844	4.50488	6.64104e-06	0.000111581	Yes	OK	833.53	653.847	968.292	697.104	571.537	692.9	1063.25	993.543	890.877	925.502
ENSMUSG00000105504	Gbp5	229898	guanylate binding protein 5	chr3:142496933-142522344	+	1.60322	0.355912	4.50454	6.65157e-06	0.000111618	Yes	OK	62.7465	19.7125	95.022	29.51	10.9984	18.6291	174.152	34.2601	50.0244	121.651
ENSMUSG00000022558	Mroh1	223658	maestro heat-like repeat family member 1	chr15:76380512-76453039	+	0.701334	0.155806	4.50132	6.75333e-06	0.000113184	Yes	OK	339.127	248.242	407.291	205.456	246.895	292.374	348.305	398.274	403.138	479.448
ENSMUSG00000035798	Zdhhc17	320150	zinc finger, DHHC domain containing 17	chr10:110941779-111010066	-	-0.547256	0.121646	-4.49877	6.83474e-06	0.000114405	Yes	OK	423.106	522.648	348.45	552.895	514.649	500.399	316.224	316.906	367.091	393.577
ENSMUSG00000020671	Rab10	19325	RAB10, member RAS oncogene family	chr12:3247427-3309969	-	-0.495278	0.110158	-4.49607	6.92208e-06	0.000115722	Yes	OK	1134.04	1359.62	964.859	1351.89	1352.04	1374.93	1017.42	1072.77	903.383	865.869
ENSMUSG00000037326	Capn15	50817	calpain 15	chr17:25959555-25965505	-	0.67964	0.151235	4.49394	6.99176e-06	0.000116742	Yes	OK	210.486	154.244	252.667	134.744	153.598	174.389	238.314	295.493	228.788	248.073
ENSMUSG00000025507	Pidd1	57913	p53 induced death domain protein 1	chr7:141438514-141443355	-	1.38154	0.307628	4.49095	7.0905e-06	0.00011814	Yes	OK	45.8924	20.259	65.1174	8.35189	20.859	31.566	59.5784	64.2377	60.3236	76.3301
ENSMUSG00000030067	Foxp1	108655	forkhead box P1	chr6:98925341-99266515	-	0.952089	0.212005	4.49087	7.09319e-06	0.00011814	Yes	OK	151.921	95.761	194.041	126.949	81.1606	79.1738	206.233	137.04	217.018	215.871
ENSMUSG00000029669	Tspan12	269831	tetraspanin 12	chr6:21771394-21852515	-	-0.690218	0.153717	-4.49018	7.11637e-06	0.000118379	Yes	OK	371.95	476.886	293.249	439.866	522.993	467.798	316.224	327.612	309.71	219.449
ENSMUSG00000030276	Ttll3	101100	tubulin tyrosine ligase-like family, member 3	chr6:113392496-113414571	+	1.19324	0.265797	4.48929	7.14604e-06	0.000118725	Yes	OK	45.5758	23.7757	61.9258	23.9421	26.1686	21.2165	64.1614	53.5314	44.1392	85.8713
ENSMUSG00000052459	Atp6v1a	11964	ATPase, H+ transporting, lysosomal V1 subunit A	chr16:44085403-44139019	-	-0.581765	0.129618	-4.48832	7.17882e-06	0.000119122	Yes	OK	991.398	1236	807.944	1261.69	1321.32	1124.99	682.86	758.005	866.6	924.31
ENSMUSG00000020196	Cabin1	104248	calcineurin binding protein 1	chr10:75646109-75764357	-	0.672229	0.14999	4.48183	7.40056e-06	0.00012265	Yes	OK	554.588	407.539	664.874	344.098	372.428	506.092	737.856	648.801	631.191	641.65
ENSMUSG00000027180	Fbxo3	57443	F-box protein 3	chr2:104027798-104055127	+	-0.529162	0.118106	-4.48039	7.45082e-06	0.00012333	Yes	OK	424.118	516.822	354.591	569.042	497.582	483.84	348.305	353.307	339.872	376.88
ENSMUSG00000037855	Zfp365	216049	zinc finger protein 365	chr10:67886104-67912662	-	-0.615078	0.137379	-4.47724	7.56128e-06	0.000125004	Yes	OK	373.069	470.068	300.32	412.583	468.759	528.861	297.892	267.657	333.987	301.742
ENSMUSG00000051367	Six1	20471	sine oculis-related homeobox 1	chr12:73041826-73046712	-	1.70901	0.381749	4.47679	7.57735e-06	0.000125007	Yes	OK	27.5885	6.94624	43.0703	8.35189	2.65478	9.83204	18.3318	34.2601	24.2766	95.4126
ENSMUSG00000031897	Psmb10	19171	proteasome (prosome, macropain) subunit, beta type 10	chr8:105935727-105938392	-	1.00084	0.223567	4.47671	7.58015e-06	0.000125007	Yes	OK	212.182	125.693	277.049	121.381	119.086	136.614	444.547	199.137	204.512	259.999
ENSMUSG00000043013	Onecut1	15379	one cut domain, family member 1	chr9:74861920-74889647	+	1.67746	0.374816	4.47542	7.62624e-06	0.000125613	Yes	OK	10.8356	2.94132	16.7563	3.34076	3.41329	2.0699	13.7489	14.9888	13.2418	25.0458
ENSMUSG00000001794	Capns1	12336	calpain, small subunit 1	chr7:30186941-30195048	-	-0.545175	0.121843	-4.47441	7.66217e-06	0.000125961	Yes	OK	492.667	609.533	405.018	644.209	592.396	591.993	339.139	389.709	448.749	442.476
ENSMUSG00000033721	Vav3	57257	vav 3 oncogene	chr3:109340682-109685694	+	-1.0817	0.241758	-4.4743	7.66621e-06	0.000125961	Yes	OK	100.442	147.673	65.0182	93.5411	158.529	190.949	73.3273	62.0964	66.2088	58.4402
ENSMUSG00000072844	G530011O06Rik	654820	RIKEN cDNA G530011O06 gene	chrX:169975042-169978917	-	1.73819	0.388574	4.47324	7.70438e-06	0.000126433	Yes	OK	11.5942	2.69524	18.2684	1.67038	2.27553	4.13981	9.16591	10.7063	35.3114	17.8899
ENSMUSG00000026121	Sema4c	20353	sema domain, immunoglobulin domain (Ig), transmembrane domain (TM) and short cytoplasmic domain, (semaphorin) 4C	chr1:36548638-36558381	-	0.93271	0.208658	4.47005	7.82026e-06	0.000128178	Yes	OK	276.068	175.87	351.217	143.652	133.498	250.458	297.892	415.404	361.206	330.366
ENSMUSG00000032316	Clk3	102414	CDC-like kinase 3	chr9:57750710-57765860	-	0.586136	0.131152	4.46913	7.85402e-06	0.000128574	Yes	OK	204.221	156.213	240.227	144.209	161.942	162.487	256.645	237.679	228.053	238.532
ENSMUSG00000007411	Mark3	17169	MAP/microtubule affinity regulating kinase 3	chr12:111574509-111656227	+	-0.474753	0.10631	-4.46574	7.97919e-06	0.000130463	Yes	OK	863.567	1035.63	734.52	960.467	1094.91	1051.51	673.694	719.462	776.85	768.071
ENSMUSG00000023800	Tiam2	24001	T cell lymphoma invasion and metastasis 2	chr17:3397206-3519397	+	1.13844	0.254998	4.4645	8.02548e-06	0.000130962	Yes	OK	85.8363	47.5735	114.533	34.5211	36.7877	71.4117	100.825	107.063	105.934	144.312
ENSMUSG00000047606	Ankrd34c	330998	ankyrin repeat domain 34C	chr9:89728248-89738475	-	-1.64997	0.369588	-4.46435	8.0312e-06	0.000130962	Yes	OK	37.8069	68.3922	14.868	29.51	56.1297	119.537	32.0807	8.56503	8.09219	10.7339
ENSMUSG00000024083	Pja2	224938	praja 2, RING-H2 motif containing	chr17:64281005-64331883	-	-0.635618	0.142383	-4.46414	8.03905e-06	0.000130962	Yes	OK	931.176	1184.1	741.484	1260.58	1227.27	1064.45	554.538	790.124	786.414	834.86
ENSMUSG00000028822	Tmem50a	71817	transmembrane protein 50A	chr4:134897848-134914916	-	-0.652214	0.146112	-4.46379	8.05218e-06	0.000131017	Yes	OK	233.056	295.671	186.095	340.757	274.581	271.675	201.65	175.583	194.213	172.935
ENSMUSG00000021244	Ylpm1	56531	YLP motif containing 1	chr12:84996320-85070515	+	0.520226	0.116617	4.46098	8.15873e-06	0.000132589	Yes	OK	694.766	554.589	799.899	589.087	481.654	593.028	788.268	785.841	783.471	842.016
ENSMUSG00000027165	B230118H07Rik	68170	RIKEN cDNA B230118H07 gene	chr2:101560780-101628986	-	-0.725128	0.162616	-4.45914	8.22887e-06	0.000133567	Yes	OK	132.986	172.581	103.289	183.185	182.422	152.138	114.574	94.2153	102.992	101.376
ENSMUSG00000017119	Nbr1	17966	neighbor of Brca1 gene 1	chr11:101552653-101581951	+	-0.64496	0.144701	-4.45719	8.30425e-06	0.000134627	Yes	OK	1171.91	1485.77	936.514	1823.5	1286.81	1346.99	999.084	860.785	966.649	919.539
ENSMUSG00000008307	1700109H08Rik	77036	RIKEN cDNA 1700109H08 gene	chr5:3571715-3584341	+	1.19191	0.267506	4.45564	8.36439e-06	0.000135438	Yes	OK	35.4121	17.8669	48.5709	16.147	19.342	18.1117	68.7443	38.5426	50.0244	36.9724
ENSMUSG00000028068	Iqgap3	404710	IQ motif containing GTPase activating protein 3	chr3:88082050-88121048	+	1.04669	0.235001	4.45398	8.42938e-06	0.000136326	Yes	OK	285.317	166.523	374.413	91.314	173.319	234.934	449.13	351.166	363.413	333.944
ENSMUSG00000047368	Abhd17b	226016	abhydrolase domain containing 17B	chr19:21653308-21685637	+	-0.857868	0.192627	-4.45351	8.44763e-06	0.000136456	Yes	OK	388.861	530.629	282.535	359.688	655.732	576.468	307.058	256.951	309.71	256.421
ENSMUSG00000025862	Stag2	20843	stromal antigen 2	chrX:42201854-42277186	+	-0.571054	0.128281	-4.45159	8.52384e-06	0.000137521	Yes	OK	1093.33	1348.24	902.151	1533.41	1296.29	1215.03	1012.83	832.949	938.694	824.126
ENSMUSG00000020020	Usp44	327799	ubiquitin specific peptidase 44	chr10:93831554-93848538	+	1.66672	0.374489	4.45064	8.56143e-06	0.000137962	Yes	OK	12.6609	3.3979	19.6082	6.12472	3.03404	1.03495	22.9148	17.1301	16.92	21.4678
ENSMUSG00000026657	Frmd4a	209630	FERM domain containing 4A	chr2:4152862-4614043	+	0.725137	0.16301	4.44841	8.65092e-06	0.000139236	Yes	OK	900.184	647.27	1089.87	579.064	533.232	829.514	980.752	1027.8	1188.08	1162.84
ENSMUSG00000030172	Erc1	111173	ELKS/RAB6-interacting/CAST family member 1	chr6:119570795-119848150	-	0.508689	0.114365	4.44796	8.66899e-06	0.000139359	Yes	OK	397.259	320.062	455.157	297.327	333.744	329.115	435.381	423.969	472.29	488.99
ENSMUSG00000062270	Morf4l1	21761	mortality factor 4 like 1	chr9:90091668-90114820	-	0.640841	0.144111	4.44686	8.71343e-06	0.000139906	Yes	OK	210.956	157.13	251.326	138.641	154.736	178.012	274.977	246.245	257.479	226.605
ENSMUSG00000062270	Morf4l1b	627352	mortality factor 4 like 1B	chr19:41525251-41526961	+	0.640841	0.144111	4.44686	8.71343e-06	0.000139906	Yes	OK	210.956	157.13	251.326	138.641	154.736	178.012	274.977	246.245	257.479	226.605
ENSMUSG00000000605	Clcn4	12727	chloride channel, voltage-sensitive 4	chr7:7282308-7298836	-	-0.508717	0.114444	-4.4451	8.78491e-06	0.000140885	Yes	OK	723.493	873.706	610.833	935.411	902.247	783.459	609.533	655.225	612.064	566.512
ENSMUSG00000048410	Zfp407	240476	zinc finger protein 407	chr18:84207701-84589504	-	0.593269	0.133569	4.44166	8.92673e-06	0.000142988	Yes	OK	385.545	294.869	453.551	266.704	281.028	336.877	513.291	398.274	464.933	437.705
ENSMUSG00000041638	Gcn1l1	231659	GCN1 general control of amino-acid synthesis 1-like 1 (yeast)	chr5:115565262-115622654	+	0.763754	0.172036	4.43949	9.01732e-06	0.000144266	Yes	OK	1109.58	777.629	1358.55	644.209	664.075	1024.6	1397.8	1528.86	1271.95	1235.59
ENSMUSG00000029056	Pank4	269614	pantothenate kinase 4	chr4:154964122-154980938	+	0.672481	0.151519	4.43827	9.06837e-06	0.00014491	Yes	OK	218.324	158.586	263.128	140.869	151.702	183.187	307.058	267.657	236.88	240.917
ENSMUSG00000064289	Tank	21353	TRAF family member-associated Nf-kappa B activator	chr2:61578585-61654169	+	-0.792213	0.17855	-4.43691	9.12586e-06	0.000145448	Yes	OK	175.422	232.996	132.241	239.421	263.961	195.606	160.403	94.2153	132.418	141.926
ENSMUSG00000068114	Ccdc134	76457	coiled-coil domain containing 134	chr15:82127921-82142202	+	0.770188	0.173588	4.43686	9.12793e-06	0.000145448	Yes	OK	114.859	81.7071	139.723	94.0979	75.4717	75.5515	119.157	145.605	158.166	135.963
ENSMUSG00000027665	Pik3ca	18706	phosphatidylinositol 3-kinase, catalytic, alpha polypeptide	chr3:32436150-32468486	+	-0.452426	0.101977	-4.43654	9.14155e-06	0.000145448	Yes	OK	690.768	819.726	594.05	863.585	794.539	801.053	600.367	558.868	628.984	587.98
ENSMUSG00000021577	Sdha	66945	succinate dehydrogenase complex, subunit A, flavoprotein (Fp)	chr13:74322254-74350240	-	-0.49087	0.110645	-4.43645	9.14549e-06	0.000145448	Yes	OK	837.38	1008.83	708.792	944.32	1109.32	972.855	641.614	747.299	718.734	727.521
ENSMUSG00000075394	Hoxc4	15423	homeobox C4	chr15:103034394-103036852	+	1.73599	0.391605	4.43301	9.29272e-06	0.000147614	Yes	OK	11.5806	2.06575	18.7168	2.78396	3.41329	0	32.0807	12.8475	13.2418	16.6972
ENSMUSG00000032349	Elovl5	68801	ELOVL family member 5, elongation of long chain fatty acids (yeast)	chr9:77917364-77984519	+	-0.590251	0.133179	-4.432	9.33612e-06	0.000148128	Yes	OK	748.798	931.344	611.889	1074.61	943.207	776.214	632.448	590.987	628.984	595.136
ENSMUSG00000004633	Chn2	69993	chimerin 2	chr6:54264857-54301812	+	-1.16151	0.262171	-4.43035	9.40789e-06	0.00014909	Yes	OK	214.436	326.07	130.711	197.105	527.544	253.563	142.072	107.063	135.36	138.348
ENSMUSG00000031816	Mthfsd	234814	methenyltetrahydrofolate synthetase domain containing	chr8:121097556-121108379	-	0.743527	0.167841	4.42995	9.42563e-06	0.000149195	Yes	OK	141.843	102.21	171.568	92.4276	112.259	101.943	123.74	203.419	170.672	188.44
ENSMUSG00000037795	N4bp2	333789	NEDD4 binding protein 2	chr5:65763520-65826784	+	0.531634	0.120042	4.42871	9.47967e-06	0.000149873	Yes	OK	311.488	246.904	359.925	270.601	227.932	242.179	371.219	342.601	359.735	366.146
ENSMUSG00000027087	Itgav	16410	integrin alpha V	chr2:83724396-83806917	+	-1.01593	0.229443	-4.4278	9.51981e-06	0.00015033	Yes	OK	6599.67	9538.48	4395.55	13303.4	6910.78	8401.22	3368.47	4640.1	5482.83	4090.82
ENSMUSG00000022451	Twf1	19230	twinfilin actin binding protein 1	chr15:94577947-94589824	-	-0.492405	0.11133	-4.42293	9.73714e-06	0.000153581	Yes	OK	522.914	633.45	440.013	631.403	644.354	624.594	389.551	441.099	492.888	436.513
ENSMUSG00000044934	Zfp367	238673	zinc finger protein 367	chr13:64133056-64153199	-	0.651423	0.147311	4.4221	9.77479e-06	0.000153952	Yes	OK	188.845	138.436	226.652	131.403	141.083	142.823	252.063	244.103	189.799	220.642
ENSMUSG00000031610	Scrg1	20284	scrapie responsive gene 1	chr8:57455922-57477585	+	-0.876043	0.198115	-4.4219	9.78366e-06	0.000153952	Yes	OK	382.075	528.622	272.165	722.16	452.83	410.876	229.148	261.233	325.159	273.119
ENSMUSG00000004945	Tmem242	70544	transmembrane protein 242	chr17:5410863-5440260	-	-0.723916	0.16374	-4.42114	9.81804e-06	0.000154311	Yes	OK	156.688	208.242	118.023	197.661	215.417	211.648	87.0761	126.334	144.188	114.495
ENSMUSG00000030884	Uqcrc2	67003	ubiquinol cytochrome c reductase core protein 2	chr7:120635188-120659523	+	-0.631466	0.142889	-4.41927	9.90351e-06	0.000155472	Yes	OK	326.46	413.913	260.87	376.949	483.929	380.862	238.314	271.94	283.962	249.265
ENSMUSG00000023473	Celsr3	107934	cadherin, EGF LAG seven-pass G-type receptor 3	chr9:108826319-108852969	+	0.877313	0.198538	4.41886	9.92225e-06	0.000155584	Yes	OK	145.962	95.414	183.873	91.8708	102.778	91.5933	169.569	209.843	129.475	226.605
ENSMUSG00000026211	Obsl1	98733	obscurin-like 1	chr1:75496337-75506452	-	0.646174	0.146247	4.41838	9.94456e-06	0.000155752	Yes	OK	259.241	192.876	309.015	204.9	161.563	212.165	320.807	340.46	286.169	288.623
ENSMUSG00000015994	Fnta	14272	farnesyltransferase, CAAX box, alpha	chr8:25998721-26015601	-	-0.72184	0.163385	-4.41804	9.9601e-06	0.000155813	Yes	OK	255.423	337.629	193.768	387.528	332.986	292.374	151.238	177.724	220.696	225.412
ENSMUSG00000033578	Tmem35a	67564	transmembrane protein 35A	chrX:134295224-134305969	+	-0.664316	0.150415	-4.41656	1.00283e-05	0.000156696	Yes	OK	188.252	240.914	148.755	230.512	216.934	275.297	142.072	154.17	144.924	153.853
ENSMUSG00000099616	4932413F04Rik	319215	RIKEN cDNA 4932413F04 gene	chr9:103557089-103565891	+	1.27878	0.28983	4.41217	1.02339e-05	0.000159564	Yes	OK	31.4976	15.7588	43.3017	14.4766	13.6532	19.1466	36.6636	42.8251	60.3236	33.3944
ENSMUSG00000068823	Csde1	229663	cold shock domain containing E1, RNA binding	chr3:103020545-103058186	+	-0.483393	0.109571	-4.41167	1.02576e-05	0.000159564	Yes	OK	2032.19	2436.03	1729.32	2203.23	2668.06	2436.79	1718.61	1650.91	1839.87	1707.89
ENSMUSG00000033209	Ttc28	209683	tetratricopeptide repeat domain 28	chr5:110879802-111289779	+	0.732175	0.165965	4.41163	1.02596e-05	0.000159564	Yes	OK	656.728	470.477	796.416	456.013	370.153	585.265	669.111	912.175	779.057	825.319
ENSMUSG00000001687	Ubl3	24109	ubiquitin-like 3	chr5:148504630-148552788	-	-0.603828	0.136877	-4.41146	1.02675e-05	0.000159564	Yes	OK	632.487	793.892	511.432	914.253	748.649	718.774	435.381	588.846	528.935	492.568
ENSMUSG00000028333	Anp32b	67628	acidic (leucine-rich) nuclear phosphoprotein 32 family, member B	chr4:46450925-46472656	+	1.05224	0.238539	4.41117	1.02814e-05	0.000159564	Yes	OK	143.995	82.4747	190.134	50.1113	87.6079	109.705	252.063	190.572	164.051	153.853
ENSMUSG00000023572	Ccndbp1	17151	cyclin D-type binding-protein 1	chr2:121008407-121016912	+	-0.672587	0.152475	-4.41113	1.02833e-05	0.000159564	Yes	OK	136.879	173.734	109.238	168.151	182.801	170.25	123.74	102.78	106.67	103.761
ENSMUSG00000073725	Lmbrd1	68421	LMBR1 domain containing 1	chr1:24678543-24766301	+	-0.6368	0.144442	-4.40869	1.03998e-05	0.000161042	Yes	OK	570.872	719.668	459.276	864.142	692.519	602.342	504.125	456.088	439.185	437.705
ENSMUSG00000068206	Pick1	18693	protein interacting with C kinase 1	chr15:79229381-79249466	+	0.729139	0.165389	4.40863	1.04026e-05	0.000161042	Yes	OK	140.674	102.914	168.994	100.779	102.399	105.565	114.574	194.854	172.143	194.403
ENSMUSG00000020156	Mum1	68114	melanoma associated antigen (mutated) 1	chr10:80226597-80245144	+	0.628215	0.142545	4.40714	1.04742e-05	0.000161963	Yes	OK	191.386	146.133	225.326	140.869	144.875	152.655	178.735	261.233	219.225	242.109
ENSMUSG00000028967	Errfi1	74155	ERBB receptor feedback inhibitor 1	chr4:150855090-150868880	+	-0.756941	0.171791	-4.40618	1.05208e-05	0.000162496	Yes	OK	124.595	164.928	94.3447	190.423	146.013	158.348	91.6591	94.2153	94.8993	96.6053
ENSMUSG00000043467	Zbtb37	240869	zinc finger and BTB domain containing 37	chr1:161017755-161034259	-	0.647369	0.147031	4.40294	1.06792e-05	0.000164753	Yes	OK	307.316	229.596	365.605	239.421	185.456	263.913	384.968	340.46	364.884	372.109
ENSMUSG00000030319	Cand2	67088	cullin-associated and neddylation-dissociated 2 (putative)	chr6:115774556-115805555	+	0.730087	0.165872	4.40151	1.07498e-05	0.00016565	Yes	OK	114.759	82.0926	139.259	84.0757	73.1962	89.0059	132.906	149.888	128.739	145.504
ENSMUSG00000066306	Numa1	101706	nuclear mitotic apparatus protein 1	chr7:101969842-102014959	+	0.543683	0.123541	4.40082	1.07842e-05	0.000165989	Yes	OK	1052.71	828.899	1220.57	883.63	695.933	907.136	1264.9	1181.97	1180.72	1254.68
ENSMUSG00000039713	Plekhg5	269608	pleckstrin homology domain containing, family G (with RhoGef domain) member 5	chr4:152096718-152115404	+	0.706313	0.160524	4.40005	1.08227e-05	0.000166391	Yes	OK	133.896	97.1127	161.484	97.4387	84.1946	109.705	164.986	158.453	166.258	156.238
ENSMUSG00000056004	9330182L06Rik	231014	RIKEN cDNA 9330182L06 gene	chr5:9266192-9480717	+	-0.846721	0.192568	-4.397	1.09757e-05	0.000168291	Yes	OK	280.784	385.331	202.374	277.839	465.725	412.428	164.986	201.278	246.444	196.788
ENSMUSG00000037098	Rab11fip3	215445	RAB11 family interacting protein 3 (class II)	chr17:25989035-26069177	-	0.660835	0.150296	4.39691	1.09805e-05	0.000168291	Yes	OK	322.183	238.571	384.891	242.205	198.73	274.78	380.385	426.11	334.722	398.348
ENSMUSG00000001248	Gramd1a	52857	GRAM domain containing 1A	chr7:31130126-31151050	-	0.534038	0.121459	4.39684	1.0984e-05	0.000168291	Yes	OK	499.935	397.397	576.838	418.708	355.362	418.121	554.538	537.455	570.132	645.228
ENSMUSG00000021065	Fut8	53618	fucosyltransferase 8	chr12:77238738-77475996	+	-0.630903	0.143571	-4.39437	1.11096e-05	0.000170021	Yes	OK	366.697	461.713	295.435	541.202	457.381	386.555	307.058	301.917	281.755	291.008
ENSMUSG00000012296	Tjap1	74094	tight junction associated protein 1	chr17:46257850-46283026	-	0.998059	0.227138	4.39407	1.1125e-05	0.000170063	Yes	OK	196.536	119.328	254.442	112.472	78.885	166.627	265.811	211.984	225.11	314.862
ENSMUSG00000005442	Cic	71722	capicua transcriptional repressor	chr7:25282178-25294159	+	0.84553	0.192488	4.39265	1.11979e-05	0.000170982	Yes	OK	959.53	643.041	1196.9	542.316	505.547	881.262	962.42	1366.12	1207.94	1251.1
ENSMUSG00000024259	Slc25a46	67453	solute carrier family 25, member 46	chr18:31580167-31609902	-	-0.654458	0.149115	-4.38894	1.13903e-05	0.000173722	Yes	OK	267.995	345.978	209.508	373.608	359.534	304.793	151.238	229.114	225.11	232.568
ENSMUSG00000091387	Gcnt4	218476	glucosaminyl (N-acetyl) transferase 4, core 2 (beta-1,6-N-acetylglucosaminyltransferase)	chr13:96924688-96950914	+	-1.4032	0.319742	-4.38854	1.14115e-05	0.000173847	Yes	OK	42.9207	71.0665	21.8113	51.2249	49.6824	112.292	22.9148	29.9776	17.6557	16.6972
ENSMUSG00000046434	Hnrnpa1	15382	heterogeneous nuclear ribonucleoprotein A1	chr15:103240396-103244962	+	0.897942	0.204654	4.38761	1.14602e-05	0.00017439	Yes	OK	189.684	123.323	239.455	85.1893	120.224	164.557	210.816	269.798	258.95	218.256
ENSMUSG00000046434	Gm5803	545091	predicted gene 5803	chr15:22713819-22714984	-	0.897942	0.204654	4.38761	1.14602e-05	0.00017439	Yes	OK	189.684	123.323	239.455	85.1893	120.224	164.557	210.816	269.798	258.95	218.256
ENSMUSG00000041697	Cox6a1	12861	cytochrome c oxidase subunit VIa polypeptide 1	chr5:115345653-115348955	-	-0.652994	0.148914	-4.38503	1.1597e-05	0.000176271	Yes	OK	377.635	481.204	299.958	442.093	523.372	478.148	252.063	387.567	284.698	275.504
ENSMUSG00000020642	Rnf144a	108089	ring finger protein 144A	chr12:26306793-26415262	-	0.835362	0.190529	4.38443	1.16289e-05	0.000176556	Yes	OK	487.34	329.352	605.832	448.775	285.2	254.081	549.955	535.314	704.756	633.301
ENSMUSG00000038212	Mfsd14b	66631	major facilitator superfamily domain containing 14B	chr13:65065029-65112982	-	-0.639462	0.145986	-4.38031	1.18512e-05	0.000179728	Yes	OK	281.017	352.038	227.752	343.541	332.227	380.345	247.48	267.657	197.891	197.981
ENSMUSG00000032558	Nphp3	74025	nephronophthisis 3 (adolescent)	chr9:104002543-104043811	+	0.899289	0.205391	4.37843	1.19537e-05	0.000181077	Yes	OK	81.0232	52.4164	102.478	52.3385	55.7505	49.1602	119.157	70.6615	119.912	100.183
ENSMUSG00000078607	1810010H24Rik	69066	RIKEN cDNA 1810010H24 gene	chr11:107028222-107030442	+	-1.12514	0.256996	-4.37805	1.19745e-05	0.000181121	Yes	OK	61.8233	96.7523	35.6265	108.575	92.1589	89.5234	13.7489	32.1189	53.7027	42.9357
ENSMUSG00000042429	Adora1	11539	adenosine A1 receptor	chr1:134199214-134235457	-	-0.860784	0.196621	-4.37789	1.19836e-05	0.000181121	Yes	OK	425.251	577.664	310.941	738.307	527.923	466.763	375.802	368.296	251.594	248.073
ENSMUSG00000046761	Fam83h	105732	family with sequence similarity 83, member H	chr15:76001091-76009498	-	1.59768	0.364979	4.37745	1.20076e-05	0.000181279	Yes	OK	14.583	4.64466	22.0367	7.7951	3.03404	3.10486	13.7489	34.2601	19.8626	20.2752
ENSMUSG00000049232	Tigd2	68140	tigger transposable element derived 2	chr6:59208869-59212033	+	-0.854199	0.195156	-4.37701	1.20321e-05	0.000181443	Yes	OK	136.709	189.705	96.9626	149.777	213.9	205.438	73.3273	96.3566	119.176	98.9906
ENSMUSG00000042138	Msantd2	235184	Myb/SANT-like DNA-binding domain containing 2	chr9:37489320-37524150	+	0.749496	0.171273	4.37604	1.20855e-05	0.000182044	Yes	OK	104.45	73.1066	127.957	66.8151	78.5058	73.9991	132.906	128.475	113.291	137.156
ENSMUSG00000052914	Cyp2j6	13110	cytochrome P450, family 2, subfamily j, polypeptide 6	chr4:96516137-96553651	-	-0.748171	0.171066	-4.37359	1.22219e-05	0.000183892	Yes	OK	621.052	820.138	471.738	1054.01	730.066	676.341	421.632	460.37	551.74	453.21
ENSMUSG00000073805	Fam196a	627214	family with sequence similarity 196, member A	chr7:134881907-134938430	-	0.955183	0.218458	4.37238	1.22901e-05	0.00018471	Yes	OK	95.423	59.2934	122.52	51.7817	45.8898	80.2088	123.74	134.899	107.405	124.036
ENSMUSG00000040270	Bach2	12014	BTB and CNC homology, basic leucine zipper transcription factor 2	chr4:32417434-32586108	+	0.953198	0.218063	4.3712	1.23564e-05	0.000185498	Yes	OK	187.085	116.798	239.8	105.234	88.3664	156.795	219.982	319.047	231.731	188.44
ENSMUSG00000026701	Prdx6	11758	peroxiredoxin 6	chr1:161240111-161251210	-	-0.526676	0.120495	-4.37094	1.23712e-05	0.000185513	Yes	OK	399.906	491.125	331.491	492.761	521.096	459.519	284.143	327.612	351.642	362.568
ENSMUSG00000070923	Klhl9	242521	kelch-like 9	chr4:88718291-88722508	-	-0.619919	0.141905	-4.36855	1.25072e-05	0.000187343	Yes	OK	999.73	1260.67	804.026	1523.38	1132.08	1126.55	733.273	802.971	887.934	791.925
ENSMUSG00000007041	Clic1	114584	chloride intracellular channel 1	chr17:35050242-35058719	+	-0.765929	0.175349	-4.36803	1.25372e-05	0.000187582	Yes	OK	390.576	517.725	295.215	392.539	623.495	537.14	261.228	355.449	299.411	264.77
ENSMUSG00000006403	Adamts4	240913	a disintegrin-like and metallopeptidase (reprolysin type) with thrombospondin type 1 motif, 4	chr1:171250128-171262267	+	-1.06906	0.244794	-4.36717	1.25868e-05	0.000188114	Yes	OK	137.014	205.329	85.7783	203.229	141.083	271.675	59.5784	72.8027	117.705	93.0273
ENSMUSG00000033847	Pla2g4c	232889	phospholipase A2, group IVC (cytosolic, calcium-independent)	chr7:13329321-13360668	+	1.54339	0.353503	4.366	1.26544e-05	0.000188914	Yes	OK	20.8386	6.71758	31.4294	5.01113	5.30957	9.83204	50.4125	21.4126	16.92	36.9724
ENSMUSG00000020745	Pafah1b1	18472	platelet-activating factor acetylhydrolase, isoform 1b, subunit 1	chr11:74673948-74724384	-	-0.460613	0.10554	-4.36433	1.27514e-05	0.000189825	Yes	OK	1908.98	2275.98	1633.73	2250	2246.71	2331.23	1425.3	1644.49	1775.13	1690
ENSMUSG00000007739	Cct4	12464	chaperonin containing Tcp1, subunit 4 (delta)	chr11:22990592-23003336	+	-0.443309	0.101581	-4.36407	1.27665e-05	0.000189825	Yes	OK	595.415	703.173	514.596	668.151	706.552	734.816	504.125	528.89	495.831	529.54
ENSMUSG00000019370	Calm3	12315	calmodulin 3	chr7:16915378-16924032	-	-0.600205	0.137534	-4.36403	1.27686e-05	0.000189825	Yes	OK	1685.17	2107	1368.81	2222.72	2350.24	1748.03	1219.07	1511.73	1316.82	1427.61
ENSMUSG00000042035	Igsf3	78908	immunoglobulin superfamily, member 3	chr3:101377124-101463060	+	1.09413	0.250718	4.36397	1.27722e-05	0.000189825	Yes	OK	117.226	67.0268	154.875	36.1915	80.0228	84.8661	114.574	164.877	180.235	159.816
ENSMUSG00000020483	Dynll2	68097	dynein light chain LC8-type 2	chr11:87979524-87987533	-	0.576139	0.132043	4.36327	1.28134e-05	0.000190227	Yes	OK	330.713	253.886	388.334	236.637	247.653	277.367	421.632	404.698	331.044	395.962
ENSMUSG00000048388	Fam171b	241520	family with sequence similarity 171, member B	chr2:83812727-83881358	+	-0.552102	0.126572	-4.36196	1.28904e-05	0.000191157	Yes	OK	834.868	1027.2	690.62	1168.71	940.552	972.337	623.282	779.417	696.664	663.118
ENSMUSG00000020564	Atxn7l1	380753	ataxin 7-like 1	chr12:33147685-33251157	+	1.08476	0.248828	4.35947	1.30375e-05	0.000193125	Yes	OK	38.7809	22.1598	51.2467	25.6125	22.7553	18.1117	45.8295	59.9552	51.4958	47.7063
ENSMUSG00000005873	Reep5	13476	receptor accessory protein 5	chr18:34344885-34373415	-	-0.74408	0.170714	-4.35863	1.3088e-05	0.000193659	Yes	OK	598.701	790.774	454.646	999.443	719.826	653.055	352.888	492.489	472.29	500.916
ENSMUSG00000027546	Atp9a	11981	ATPase, class II, type 9A	chr2:168634437-168742136	-	-0.55421	0.127193	-4.35724	1.31714e-05	0.000194678	Yes	OK	1108.69	1365.46	916.109	1478.84	1251.92	1365.62	783.685	1066.35	871.014	943.392
ENSMUSG00000093803	Ppp2r3d	19054	protein phosphatase 2 (formerly 2A), regulatory subunit B'', delta	chr9:124474345-124476862	-	0.90962	0.208855	4.35528	1.32899e-05	0.000196213	Yes	OK	96.0895	61.2888	122.19	50.6681	57.6467	75.5515	114.574	152.029	99.3132	122.844
ENSMUSG00000020570	Sypl	19027	synaptophysin-like protein	chr12:32954185-32979502	+	0.78328	0.179944	4.35292	1.34336e-05	0.000198115	Yes	OK	168.198	117.208	206.44	128.619	100.882	122.124	187.901	244.103	233.938	159.816
ENSMUSG00000016262	Sertad4	214791	SERTA domain containing 4	chr1:192844487-192855752	-	0.933164	0.214479	4.35083	1.35623e-05	0.000199795	Yes	OK	55.4279	35.3751	70.4675	35.0779	32.2367	38.8107	59.5784	83.509	68.4158	70.3668
ENSMUSG00000022564	Grina	66168	glutamate receptor, ionotropic, N-methyl D-aspartate-associated protein 1 (glutamate binding)	chr15:76246806-76249904	+	-0.561567	0.129119	-4.34922	1.36625e-05	0.000201049	Yes	OK	542.223	673.451	443.803	734.409	664.455	621.489	348.305	494.63	467.14	465.136
ENSMUSG00000031299	Pdha1	18597	pyruvate dehydrogenase E1 alpha 1	chrX:160122218-160138430	-	-0.545258	0.125517	-4.34411	1.3984e-05	0.000205434	Yes	OK	521.577	643.319	430.271	580.178	700.863	648.915	357.47	464.653	461.255	437.705
ENSMUSG00000032327	Stra6	20897	stimulated by retinoic acid gene 6	chr9:58129348-58153997	+	-1.45425	0.334772	-4.344	1.39912e-05	0.000205434	Yes	OK	21.641	36.8595	10.2272	43.4298	32.9952	34.1534	9.16591	17.1301	11.0348	3.57797
ENSMUSG00000029686	Cul1	26965	cullin 1	chr6:47454323-47526139	+	-0.626652	0.144279	-4.34333	1.40338e-05	0.000205834	Yes	OK	539.511	683.234	431.719	680.4	762.302	606.999	417.049	351.166	489.945	468.714
ENSMUSG00000043207	Zmpste24	230709	zinc metallopeptidase, STE24	chr4:121059237-121098243	-	-0.586169	0.134975	-4.34281	1.4067e-05	0.000206095	Yes	OK	311.446	389.878	252.622	424.833	375.842	368.96	242.897	229.114	292.79	245.687
ENSMUSG00000039156	Stim2	116873	stromal interaction molecule 2	chr5:53998522-54121057	+	-0.547457	0.126138	-4.34014	1.4239e-05	0.000208388	Yes	OK	389.819	480.092	322.114	456.013	536.646	447.617	293.309	336.177	346.493	312.476
ENSMUSG00000025777	Gdap1	14545	ganglioside-induced differentiation-associated-protein 1	chr1:17145372-17164270	+	-0.819184	0.188778	-4.33941	1.42866e-05	0.000208855	Yes	OK	169.172	226.008	126.545	277.839	225.277	174.907	146.655	126.334	110.348	122.844
ENSMUSG00000020777	Acox1	11430	acyl-Coenzyme A oxidase 1, palmitoyl	chr11:116171882-116199045	-	-0.592678	0.13666	-4.33688	1.4452e-05	0.000211043	Yes	OK	1258.35	1572.07	1023.07	1802.34	1459.75	1454.11	866.178	1134.87	1120.4	970.823
ENSMUSG00000073600	Prob1	381148	proline rich basic protein 1	chr18:35650350-35655199	-	1.27661	0.294578	4.33368	1.46634e-05	0.000213795	Yes	OK	26.627	12.7461	37.0376	14.4766	12.8947	10.867	32.0807	47.1076	27.2192	41.743
ENSMUSG00000021754	Map3k1	26401	mitogen-activated protein kinase kinase kinase 1	chr13:111746434-111808983	-	0.539678	0.124535	4.33355	1.46724e-05	0.000213795	Yes	OK	961.295	760.548	1111.86	697.104	702.759	881.779	1022	1169.13	1173.37	1082.93
ENSMUSG00000022454	Nell2	54003	NEL-like 2	chr15:95219439-95528252	-	-0.776126	0.179196	-4.33115	1.48331e-05	0.000215902	Yes	OK	1301.08	1732.17	977.758	1844.1	1664.93	1687.49	728.69	1344.71	996.811	840.824
ENSMUSG00000047454	Gphn	268566	gephyrin	chr12:78226654-78684769	+	-0.613708	0.141757	-4.32931	1.49579e-05	0.000217482	Yes	OK	446.514	563.902	358.473	585.746	615.91	490.05	329.973	308.341	387.689	407.889
ENSMUSG00000035696	Rnf38	73469	ring finger protein 38	chr4:44126211-44167538	-	0.548758	0.126817	4.32717	1.5104e-05	0.000219368	Yes	OK	371.916	291.784	432.014	288.419	266.616	320.318	472.044	372.579	451.691	431.742
ENSMUSG00000005682	Pan2	103135	PAN2 poly(A) specific ribonuclease subunit	chr10:128303334-128321358	+	0.592534	0.136956	4.32646	1.51523e-05	0.000219832	Yes	OK	256.447	198.533	299.882	195.434	198.35	201.816	297.892	244.103	320.009	337.522
ENSMUSG00000063765	Chadl	214685	chondroadherin-like	chr15:81686166-81697287	-	0.996389	0.230336	4.32581	1.51975e-05	0.000220249	Yes	OK	272.808	165.087	353.599	198.218	93.676	203.368	352.888	434.675	296.468	330.366
ENSMUSG00000021054	Sgpp1	81535	sphingosine-1-phosphate phosphatase 1	chr12:75714247-75735729	-	-0.731652	0.16916	-4.32521	1.5239e-05	0.000220611	Yes	OK	278.627	367.645	211.863	424.276	394.046	284.612	169.569	222.691	221.432	233.761
ENSMUSG00000092341	Malat1	72289	metastasis associated lung adenocarcinoma transcript 1 (non-coding RNA)	chr19:5795689-5802671	-	1.14714	0.265339	4.32331	1.53703e-05	0.000222272	Yes	OK	44590.3	24117.1	59945.2	31039.5	19006.4	22305.3	53964.3	61261.4	61652.2	62903.1
ENSMUSG00000005034	Prkacb	18749	protein kinase, cAMP dependent, catalytic, beta	chr3:146729578-146770693	-	-0.52703	0.121921	-4.32274	1.54106e-05	0.000222614	Yes	OK	1004.26	1221.92	841.013	1398.11	1182.52	1085.15	838.681	854.361	790.828	880.181
ENSMUSG00000036552	Ermard	381062	ER membrane associated RNA degradation	chr17:15041611-15064232	+	-1.56284	0.361653	-4.32139	1.55048e-05	0.000223733	Yes	OK	170.622	309.032	66.814	474.387	136.532	316.178	50.4125	47.1076	83.8645	85.8713
ENSMUSG00000036552	Gm3435	100041621	predicted gene 3435	chr17:15009839-15022449	+	-1.56284	0.361653	-4.32139	1.55048e-05	0.000223733	Yes	OK	170.622	309.032	66.814	474.387	136.532	316.178	50.4125	47.1076	83.8645	85.8713
ENSMUSG00000036552	9030025P20Rik	100041574	RIKEN cDNA 9030025P20 gene	chr17:14978863-14991577	+	-1.56284	0.361653	-4.32139	1.55048e-05	0.000223733	Yes	OK	170.622	309.032	66.814	474.387	136.532	316.178	50.4125	47.1076	83.8645	85.8713
ENSMUSG00000038463	Olfml2b	320078	olfactomedin-like 2B	chr1:170644531-170682789	+	-1.12325	0.260044	-4.31948	1.56394e-05	0.000225433	Yes	OK	91.1985	140.916	53.9106	105.234	131.222	186.291	22.9148	55.6727	75.0367	62.0182
ENSMUSG00000047126	Cltc	67300	clathrin, heavy polypeptide (Hc)	chr11:86694652-86757492	-	-0.509252	0.117911	-4.31895	1.56771e-05	0.000225733	Yes	OK	4153.22	5029.13	3496.28	5295.65	4830.19	4961.56	3120.99	3415.3	3926.92	3521.92
ENSMUSG00000020986	Sec23a	20334	SEC23 homolog A, COPII coat complex component	chr12:58958383-59012017	-	-0.597091	0.138377	-4.31497	1.59626e-05	0.000229598	Yes	OK	517.435	648.181	419.376	691.536	706.552	546.455	403.3	372.579	462.726	438.898
ENSMUSG00000028249	Sdcbp	53378	syndecan binding protein	chr4:6365679-6396122	+	-0.566685	0.131346	-4.31444	1.6001e-05	0.000229903	Yes	OK	992.664	1222.56	820.246	1360.8	1165.83	1141.03	944.089	689.485	861.45	785.961
ENSMUSG00000026955	Sapcd2	72080	suppressor APC domain containing 2	chr2:25372034-25378213	+	0.633149	0.146765	4.31404	1.60298e-05	0.000229947	Yes	OK	447.415	332.577	533.543	327.951	297.715	372.065	669.111	513.902	459.784	491.375
ENSMUSG00000019194	Scn1b	20266	sodium channel, voltage-gated, type I, beta	chr7:31116523-31127023	-	-1.11995	0.259612	-4.31392	1.60384e-05	0.000229947	Yes	OK	105.047	159.364	64.3091	137.528	235.517	105.048	45.8295	72.8027	70.6227	67.9815
ENSMUSG00000067879	3110035E14Rik	76982	RIKEN cDNA 3110035E14 gene	chr1:9601266-9627142	+	-0.815827	0.189325	-4.30914	1.63891e-05	0.000234723	Yes	OK	1725.53	2324.57	1276.25	3071.82	2057.08	1844.8	1484.88	1036.37	1416.13	1167.61
ENSMUSG00000023009	Nckap5l	380969	NCK-associated protein 5-like	chr15:99422033-99457748	-	0.935573	0.217422	4.30303	1.68478e-05	0.000241035	Yes	OK	216.199	137.009	275.591	139.198	87.6079	184.221	242.897	327.612	286.169	245.687
ENSMUSG00000039578	Ccser1	232035	coiled-coil serine rich 1	chr6:61180324-62382863	+	0.670918	0.1561	4.298	1.72343e-05	0.000246301	Yes	OK	157.76	113.419	191.016	111.359	114.535	114.362	233.731	192.713	161.108	176.513
ENSMUSG00000015981	Stk32c	57740	serine/threonine kinase 32C	chr7:139103637-139213307	-	1.3194	0.307172	4.29532	1.74442e-05	0.000249036	Yes	OK	24.0484	11.1903	33.692	9.46547	14.7909	9.31457	22.9148	40.6839	29.4261	41.743
ENSMUSG00000029090	Adgra3	70693	adhesion G protein-coupled receptor A3	chr5:49959950-50058996	-	0.935915	0.21793	4.29456	1.75039e-05	0.000249622	Yes	OK	489.708	310.565	624.066	346.325	283.683	301.689	403.3	713.038	481.853	898.071
ENSMUSG00000034801	Sos2	20663	son of sevenless homolog 2 (Drosophila)	chr12:69583760-69681852	-	-0.507365	0.118155	-4.29405	1.75441e-05	0.000249929	Yes	OK	259.141	313.917	218.059	314.588	316.678	310.486	206.233	226.973	214.811	224.22
ENSMUSG00000026034	Clk1	12747	CDC-like kinase 1	chr1:58411987-58424088	-	0.495608	0.115441	4.29318	1.76135e-05	0.000250466	Yes	OK	491.742	396.134	563.449	433.741	391.391	363.268	595.784	509.619	572.339	576.054
ENSMUSG00000028059	Arhgef2	16800	rho/rac guanine nucleotide exchange factor (GEF) 2	chr3:88616206-88648052	+	0.801258	0.186638	4.2931	1.76192e-05	0.000250466	Yes	OK	734.339	505.011	906.334	448.218	480.516	586.3	760.77	813.678	778.322	1272.57
ENSMUSG00000045404	Kcnk13	217826	potassium channel, subfamily K, member 13	chr12:99964498-100062682	+	-1.05561	0.246031	-4.29055	1.78229e-05	0.000253092	Yes	OK	91.3769	133.969	59.4329	124.165	122.499	155.243	41.2466	98.4978	41.9323	56.0549
ENSMUSG00000039242	B3galnt2	97884	UDP-GalNAc:betaGlcNAc beta 1,3-galactosaminyltransferase, polypeptide 2	chr13:13954673-13999068	+	0.721662	0.168229	4.28976	1.78863e-05	0.000253723	Yes	OK	110.538	77.366	135.417	80.1781	75.851	76.069	169.569	124.193	125.061	122.844
ENSMUSG00000075318	Scn2a	110876	sodium channel, voltage-gated, type II, alpha	chr2:65670444-65767447	+	-0.986809	0.230097	-4.28867	1.79746e-05	0.000254707	Yes	OK	423.753	607.693	285.798	796.77	664.075	362.233	274.977	254.81	241.294	372.109
ENSMUSG00000052488	Cherp	27967	calcium homeostasis endoplasmic reticulum protein	chr8:72460482-72475233	-	0.878694	0.204934	4.28769	1.80544e-05	0.000255566	Yes	OK	171.707	111.106	217.158	89.6436	96.71	146.963	242.897	254.81	201.569	169.357
ENSMUSG00000039850	Endov	338371	endonuclease V	chr11:119491619-119511465	+	0.731425	0.170631	4.28659	1.81435e-05	0.000256557	Yes	OK	112.353	80.8361	135.99	86.8596	71.2999	84.3486	137.489	124.193	152.28	130
ENSMUSG00000014444	Piezo1	234839	piezo-type mechanosensitive ion channel component 1	chr8:122481697-122551329	-	0.731758	0.170765	4.28518	1.82591e-05	0.000257919	Yes	OK	292.267	209.899	354.043	180.401	188.49	260.808	284.143	428.251	362.677	341.1
ENSMUSG00000038895	Zfp653	319601	zinc finger protein 653	chr9:22055410-22071376	-	0.880238	0.205511	4.28317	1.84252e-05	0.000259991	Yes	OK	59.4085	38.4378	75.1365	36.7483	37.167	41.3981	77.9102	81.3678	72.0941	69.1741
ENSMUSG00000048330	Ric3	320360	RIC3 acetylcholine receptor chaperone	chr7:109034318-109083331	-	-0.646651	0.151074	-4.28036	1.86591e-05	0.000262924	Yes	OK	247.225	312.608	198.187	344.098	330.331	263.395	206.233	199.137	175.086	212.293
ENSMUSG00000038517	Tbkbp1	73174	TBK1 binding protein 1	chr11:97136170-97149712	-	0.747458	0.174631	4.2802	1.86723e-05	0.000262924	Yes	OK	173.323	122.08	211.755	104.12	115.673	146.446	201.65	246.245	177.293	221.834
ENSMUSG00000097571	Jpx	70252	Jpx transcript, Xist activator (non-protein coding)	chrX:103493557-103506425	+	1.12069	0.261921	4.27873	1.87962e-05	0.000264391	Yes	OK	45.9626	24.9356	61.7328	22.8285	17.825	34.1534	73.3273	62.0964	56.6453	54.8622
ENSMUSG00000036832	Lpar3	65086	lysophosphatidic acid receptor 3	chr3:146220960-146286214	+	-1.66905	0.390182	-4.27761	1.88913e-05	0.000265449	Yes	OK	19.8423	37.6463	6.48939	67.9287	17.0665	27.9437	13.7489	6.42377	2.20696	3.57797
ENSMUSG00000022265	Ank	11732	progressive ankylosis	chr15:27466676-27594907	+	-0.723805	0.169235	-4.27691	1.89501e-05	0.000265997	Yes	OK	409.552	538.634	312.741	662.026	469.518	484.358	229.148	368.296	330.308	323.21
ENSMUSG00000042225	Ammecr1	56068	Alport syndrome, mental retardation, midface hypoplasia and elliptocytosis chromosomal region gene 1	chrX:142853473-142966728	-	0.729551	0.170626	4.27573	1.90508e-05	0.000266989	Yes	OK	143.355	100.297	175.649	86.3028	101.261	113.327	215.399	171.301	169.2	146.697
ENSMUSG00000020275	Rel	19696	reticuloendotheliosis oncogene	chr11:23741728-23770970	-	0.872439	0.20405	4.27562	1.90607e-05	0.000266989	Yes	OK	86.5651	57.8958	108.067	57.9064	50.0616	65.7195	100.825	96.3566	136.096	98.9906
ENSMUSG00000023809	Rps6ka2	20112	ribosomal protein S6 kinase, polypeptide 2	chr17:7170114-7303316	+	0.939868	0.219908	4.27392	1.92068e-05	0.000268647	Yes	OK	115.829	73.8521	147.311	66.2583	80.7813	74.5166	114.574	130.617	125.797	218.256
ENSMUSG00000023913	Pla2g7	27226	phospholipase A2, group VII (platelet-activating factor acetylhydrolase, plasma)	chr17:43568450-43612201	+	-1.17326	0.274526	-4.27377	1.92192e-05	0.000268647	Yes	OK	189.583	290.903	113.593	413.14	319.333	140.236	123.74	83.509	105.198	141.926
ENSMUSG00000001419	Mef2d	17261	myocyte enhancer factor 2D	chr3:88142371-88172091	+	0.705814	0.165201	4.27246	1.93331e-05	0.000269958	Yes	OK	345.645	251.083	416.566	204.343	227.553	321.353	375.802	447.523	436.243	406.696
ENSMUSG00000031093	Dock11	75974	dedicator of cytokinesis 11	chrX:35888831-36076562	+	-0.631336	0.147783	-4.27205	1.93685e-05	0.000270171	Yes	OK	261.017	330.159	209.161	378.619	296.198	315.66	206.233	199.137	192.741	238.532
ENSMUSG00000034575	Papd7	210106	PAP associated domain containing 7	chr13:69497958-69533864	-	0.567262	0.132792	4.2718	1.93898e-05	0.000270186	Yes	OK	274.418	212.97	320.505	193.764	205.556	239.591	348.305	284.787	328.102	320.825
ENSMUSG00000037266	Rsrp1	27981	arginine/serine rich protein 1	chr4:134923624-134927370	+	0.671372	0.157338	4.26707	1.98061e-05	0.000275409	Yes	OK	518.806	383.468	620.31	355.79	325.78	468.833	618.699	520.325	638.547	703.668
ENSMUSG00000015656	Hspa8	15481	heat shock protein 8	chr9:40801272-40805199	+	-0.554072	0.129849	-4.26704	1.9808e-05	0.000275409	Yes	OK	1208.74	1489.4	998.238	1654.23	1543.57	1270.4	893.676	1029.94	1096.12	973.209
ENSMUSG00000021720	Rnf180	71816	ring finger protein 180	chr13:105147493-105293014	-	-0.758105	0.177674	-4.26684	1.98263e-05	0.000275409	Yes	OK	560.175	742.086	423.742	940.979	681.9	603.377	421.632	334.036	488.474	450.825
ENSMUSG00000071454	Dtnb	13528	dystrobrevin, beta	chr12:3572390-3781398	+	0.588764	0.138028	4.26553	1.99425e-05	0.000276355	Yes	OK	188.56	143.73	222.182	145.323	151.323	134.544	233.731	239.821	214.811	200.366
ENSMUSG00000039568	Ubald1	207740	UBA-like domain containing 1	chr16:4874778-4879851	-	1.03599	0.242881	4.26543	1.99518e-05	0.000276355	Yes	OK	87.626	52.3256	114.101	47.8842	42.8558	66.2369	73.3273	167.018	120.647	95.4126
ENSMUSG00000047216	Cdh19	227485	cadherin 19, type 2	chr1:110889194-110977372	-	-0.798717	0.187258	-4.26533	1.99603e-05	0.000276355	Yes	OK	462.128	624.283	340.511	739.421	486.584	646.845	274.977	289.07	441.392	356.605
ENSMUSG00000027330	Cdc25b	12531	cell division cycle 25B	chr2:131186947-131198511	+	0.985731	0.231113	4.26515	1.99769e-05	0.000276355	Yes	OK	186.049	112.467	241.235	64.5879	117.569	155.243	279.56	237.679	235.409	212.293
ENSMUSG00000020015	Cdk17	237459	cyclin-dependent kinase 17	chr10:93160875-93241342	+	-0.524061	0.122881	-4.26478	2.001e-05	0.000276527	Yes	OK	602.009	731.764	504.694	636.971	817.294	741.026	504.125	513.902	520.107	480.641
ENSMUSG00000024807	Syvn1	74126	synovial apoptosis inhibitor 1, synoviolin	chr19:6046575-6053718	+	0.83561	0.195945	4.26451	2.00342e-05	0.000276575	Yes	OK	193.71	131.954	240.027	114.142	107.329	174.389	178.735	254.81	258.214	268.348
ENSMUSG00000042444	Fam63b	235461	family with sequence similarity 63, member B	chr9:70599013-70657174	-	-0.624238	0.146402	-4.26387	2.00917e-05	0.000277083	Yes	OK	1012.84	1276.51	815.093	1559.02	1210.2	1060.31	811.183	841.514	856.301	751.374
ENSMUSG00000028005	Gucy1b3	54195	guanylate cyclase 1, soluble, beta 3	chr3:82032003-82074711	-	-0.713699	0.167471	-4.26162	2.0295e-05	0.000279599	Yes	OK	231.819	303.387	178.143	279.51	366.74	263.913	155.82	171.301	174.35	211.1
ENSMUSG00000046179	E2f8	108961	E2F transcription factor 8	chr7:48866428-48881041	-	1.07964	0.253373	4.26107	2.0345e-05	0.000279999	Yes	OK	119.394	66.0175	159.427	40.6459	73.5755	83.8311	233.731	147.747	115.498	140.734
ENSMUSG00000020978	Klhdc2	69554	kelch domain containing 2	chr12:69296680-69310687	+	-0.628812	0.147619	-4.25969	2.04712e-05	0.000281442	Yes	OK	357.831	454.831	285.081	387.528	511.236	465.728	224.565	329.754	294.997	291.008
ENSMUSG00000031765	Mt1	17748	metallothionein 1	chr8:94179088-94180327	+	-1.0758	0.252568	-4.25946	2.04918e-05	0.000281442	Yes	OK	473.359	704.381	300.093	379.733	798.332	935.079	183.318	321.189	352.378	343.485
ENSMUSG00000030678	Maz	17188	MYC-associated zinc finger protein (purine-binding transcription factor)	chr7:127022136-127026479	-	0.655736	0.153992	4.25824	2.06045e-05	0.000282699	Yes	OK	661.823	490.104	790.611	433.741	462.691	573.881	815.766	946.435	658.41	741.833
ENSMUSG00000060733	Ipmk	69718	inositol polyphosphate multikinase	chr10:71347792-71385885	+	-0.549617	0.129096	-4.25741	2.06805e-05	0.000283354	Yes	OK	230.667	283.904	190.739	269.488	296.577	285.647	192.484	171.301	196.42	202.752
ENSMUSG00000021576	Pdcd6	18570	programmed cell death 6	chr13:74303120-74317326	-	-0.578988	0.136004	-4.25714	2.07061e-05	0.000283354	Yes	OK	202.108	248.396	167.393	262.806	245.378	237.004	178.735	177.724	154.487	158.623
ENSMUSG00000102206	Pcdha11	12942	protocadherin alpha 11	chr18:37010857-37187657	+	1.19324	0.280298	4.25703	2.07157e-05	0.000283354	Yes	OK	36.4256	18.7648	49.6713	16.147	14.7909	25.3563	59.5784	42.8251	58.1166	38.165
ENSMUSG00000036955	Kif1bp	72320	KIF1 binding protein	chr10:62558469-62578457	-	-0.710117	0.166824	-4.25668	2.0749e-05	0.00028352	Yes	OK	284.092	370.961	218.94	439.866	308.714	364.303	219.982	179.866	255.272	220.642
ENSMUSG00000061666	Gdpd1	66569	glycerophosphodiester phosphodiesterase domain containing 1	chr11:87033793-87074137	-	-0.64013	0.150559	-4.25168	2.12171e-05	0.000289306	Yes	OK	175.486	221.135	141.25	220.49	245.757	197.158	151.238	141.323	141.245	131.192
ENSMUSG00000048216	Gpr85	64450	G protein-coupled receptor 85	chr6:13834451-13839942	-	-0.748127	0.175961	-4.25167	2.1218e-05	0.000289306	Yes	OK	183.67	245.129	137.575	278.953	254.101	202.333	100.825	143.464	139.039	166.972
ENSMUSG00000031673	Cdh11	12552	cadherin 11	chr8:102632094-102785111	-	-0.798762	0.187879	-4.25147	2.12372e-05	0.000289306	Yes	OK	565.713	759.484	420.385	1000.56	737.651	540.245	417.049	368.296	456.105	440.091
ENSMUSG00000027998	Plrg1	53317	pleiotropic regulator 1	chr3:83055537-83072291	+	-0.56127	0.132061	-4.25008	2.13694e-05	0.000290811	Yes	OK	220.774	269.374	184.325	277.839	277.235	253.046	201.65	190.572	172.143	172.935
ENSMUSG00000034557	Zfyve9	230597	zinc finger, FYVE domain containing 9	chr4:108639258-108723876	-	-0.480226	0.113003	-4.24969	2.1407e-05	0.000291027	Yes	OK	441.368	529.569	375.217	557.906	538.163	492.637	348.305	396.132	360.47	395.962
ENSMUSG00000036057	Ptpn23	104831	protein tyrosine phosphatase, non-receptor type 23	chr9:110385088-110408210	-	0.812688	0.191259	4.24916	2.14575e-05	0.000291417	Yes	OK	346.836	237.209	429.057	211.024	179.767	320.835	366.636	483.924	464.933	400.733
ENSMUSG00000042228	Lyn	17096	LYN proto-oncogene, Src family tyrosine kinase	chr4:3678120-3791612	+	-0.780165	0.183648	-4.24815	2.15541e-05	0.000292433	Yes	OK	181.748	241.769	136.731	293.986	193.799	237.522	155.82	109.204	147.131	134.77
ENSMUSG00000008200	Fnbp4	55935	formin binding protein 4	chr2:90745369-90781020	+	0.670561	0.157888	4.24707	2.16582e-05	0.000293548	Yes	OK	451.713	331.877	541.59	266.147	317.057	412.428	595.784	501.054	505.394	564.127
ENSMUSG00000069874	Irgm2	54396	immunity-related GTPase family M member 2	chr11:58214976-58222783	+	1.61314	0.380024	4.24483	2.18757e-05	0.000296196	Yes	OK	274.505	73.7208	425.093	97.4387	36.7877	86.936	737.856	184.148	325.159	453.21
ENSMUSG00000034156	Bzrap1	207777	benzodiazepine receptor associated protein 1	chr11:87760540-87785928	+	0.644042	0.151767	4.24362	2.19941e-05	0.000297306	Yes	OK	508.902	380.708	605.048	442.65	311.368	388.107	577.452	672.355	521.578	648.806
ENSMUSG00000004661	Arid3b	56380	AT rich interactive domain 3B (BRIGHT-like)	chr9:57790504-57834234	-	1.08323	0.255266	4.24354	2.20021e-05	0.000297306	Yes	OK	39.5535	22.919	52.0293	29.51	20.1005	19.1466	41.2466	59.9552	54.4384	52.4769
ENSMUSG00000050705	2310061I04Rik	69662	RIKEN cDNA 2310061I04 gene	chr17:35892676-35897378	-	0.968043	0.228197	4.24215	2.21393e-05	0.000298775	Yes	OK	59.949	36.4403	77.5805	26.1692	40.201	42.9505	82.4932	79.2265	69.8871	78.7154
ENSMUSG00000055692	Tmem191c	224019	transmembrane protein 191C	chr16:17276299-17278661	+	1.04809	0.247075	4.24198	2.21555e-05	0.000298775	Yes	OK	47.3705	27.6512	62.1599	31.7372	22.7553	28.4612	64.1614	53.5314	52.2314	78.7154
ENSMUSG00000033184	Tmed7	66676	transmembrane emp24 protein transport domain containing 7	chr18:46585927-46597535	-	-0.474221	0.1119	-4.23789	2.25629e-05	0.000303963	Yes	OK	980.471	1169.12	838.982	1190.42	1149.52	1167.43	879.927	869.35	888.67	717.98
ENSMUSG00000030447	Cyfip1	20430	cytoplasmic FMR1 interacting protein 1	chr7:55842070-55932633	+	-0.53376	0.125975	-4.23704	2.26486e-05	0.000304812	Yes	OK	987.044	1208.01	821.324	1344.65	1063.81	1215.55	751.605	845.796	911.475	776.42
ENSMUSG00000068917	Clk2	12748	CDC-like kinase 2	chr3:89164794-89177087	+	0.672102	0.158735	4.23411	2.29456e-05	0.000308499	Yes	OK	192.54	139.872	232.041	119.154	146.772	153.69	270.394	211.984	200.098	245.687
ENSMUSG00000031352	Hccs	15159	holocytochrome c synthetase	chrX:169311530-169320372	-	-0.637648	0.150613	-4.23369	2.29891e-05	0.000308773	Yes	OK	179.95	227.789	144.071	207.127	248.033	228.207	155.82	126.334	158.166	135.963
ENSMUSG00000068220	Lgals1	16852	lectin, galactose binding, soluble 1	chr15:78926724-78930465	+	-0.951966	0.224982	-4.2313	2.32341e-05	0.000311569	Yes	OK	391.775	560.523	265.214	449.332	593.155	639.083	123.74	314.765	342.079	280.275
ENSMUSG00000028845	Tekt2	24084	tektin 2	chr4:126322120-126325199	-	1.587	0.375071	4.23121	2.32437e-05	0.000311569	Yes	OK	13.7233	3.61142	21.3073	4.45434	3.79255	2.58738	32.0807	25.6951	9.5635	17.8899
ENSMUSG00000021451	Sema4d	20354	sema domain, immunoglobulin domain (Ig), transmembrane domain (TM) and short cytoplasmic domain, (semaphorin) 4D	chr13:51701247-51793747	-	0.815798	0.192869	4.2298	2.33896e-05	0.00031321	Yes	OK	214.081	143.551	266.979	180.401	114.156	136.096	352.888	211.984	244.237	258.807
ENSMUSG00000072704	Smim10l1	381820	small integral membrane protein 10 like 1	chr6:133105238-133107750	+	-0.750477	0.17744	-4.22948	2.34231e-05	0.000313345	Yes	OK	456.614	597.789	350.733	746.659	588.224	458.484	421.632	351.166	294.997	335.137
ENSMUSG00000009013	Dynll1	56455	dynein light chain LC8-type 1	chr5:115297109-115300990	-	-0.550935	0.130268	-4.22925	2.34469e-05	0.000313351	Yes	OK	381.507	473.055	312.847	521.158	435.385	462.624	270.394	297.635	339.872	343.485
ENSMUSG00000032262	Elovl4	83603	elongation of very long chain fatty acids (FEN1/Elo2, SUR4/Elo3, yeast)-like 4	chr9:83778691-83806305	-	-0.728709	0.172399	-4.22688	2.36949e-05	0.00031635	Yes	OK	186.613	246.921	141.382	208.797	288.234	243.731	100.825	167.018	148.602	149.082
ENSMUSG00000050063	Klk6	19144	kallikrein related-peptidase 6	chr7:43825449-43832027	+	-1.59788	0.378065	-4.22646	2.374e-05	0.000316635	Yes	OK	10.4929	20.5443	2.95435	23.3853	18.5835	19.6641	0	4.28251	5.14958	2.38532
ENSMUSG00000097267	1700109K24Rik	74303	RIKEN cDNA 1700109K24 gene	chr15:77084397-77096314	+	1.35441	0.32057	4.22499	2.38952e-05	0.000318389	Yes	OK	19.6905	8.71235	27.9241	7.2383	10.6191	8.27962	27.4977	19.2713	27.9548	36.9724
ENSMUSG00000046985	Tapt1	231225	transmembrane anterior posterior transformation 1	chr5:44175161-44226606	-	-0.502175	0.118877	-4.22434	2.39647e-05	0.000318998	Yes	OK	265.818	319.507	225.55	311.804	326.918	319.8	229.148	237.679	220.696	214.678
ENSMUSG00000096768	Erdr1	170942	erythroid differentiation regulator 1	chrY:90785441-90816465	+	1.59689	0.378236	4.22195	2.42195e-05	0.000322069	Yes	OK	25.6748	7.10603	39.6014	3.89755	1.89627	15.5243	50.4125	34.2601	27.2192	46.5136
ENSMUSG00000000149	Gna12	14673	guanine nucleotide binding protein, alpha 12	chr5:140759943-140830431	-	-0.485601	0.115067	-4.22016	2.44134e-05	0.000323772	Yes	OK	735.57	882.765	625.174	948.218	813.123	886.954	600.367	689.485	640.754	570.09
ENSMUSG00000010453	Kansl3	226976	KAT8 regulatory NSL complex subunit 3	chr1:36335729-36369181	-	0.521668	0.123614	4.22015	2.44143e-05	0.000323772	Yes	OK	355.108	281.823	410.072	275.056	259.41	311.003	449.13	366.155	417.116	407.889
ENSMUSG00000047678	Gpr82	319200	G protein-coupled receptor 82	chrX:13661362-13667433	+	1.29899	0.307812	4.22009	2.44201e-05	0.000323772	Yes	OK	26.317	12.2953	36.8334	17.2606	7.20584	12.4194	41.2466	34.2601	36.047	35.7797
ENSMUSG00000027434	Nkx2-2	18088	NK2 homeobox 2	chr2:147183151-147186402	-	0.785195	0.186298	4.21472	2.5009e-05	0.000331251	Yes	OK	164.869	112.372	204.242	121.381	85.3324	130.404	256.645	182.007	183.913	194.403
ENSMUSG00000024068	Spast	50850	spastin	chr17:74338986-74391113	+	-0.506854	0.120323	-4.21245	2.52611e-05	0.000333994	Yes	OK	621.915	747.915	527.416	776.169	780.886	686.691	582.035	539.597	534.82	453.21
ENSMUSG00000040310	Alx4	11695	aristaless-like homeobox 4	chr2:93642433-93681339	+	1.49896	0.355844	4.21241	2.52659e-05	0.000333994	Yes	OK	16.121	5.29288	24.2421	5.56793	7.20584	3.10486	32.0807	29.9776	20.5983	14.3119
ENSMUSG00000021218	Gdi2	14569	guanosine diphosphate (GDP) dissociation inhibitor 2	chr13:3538074-3566261	+	-0.488098	0.115893	-4.21162	2.53545e-05	0.000334835	Yes	OK	1106.2	1331.61	937.144	1246.1	1478.34	1270.4	875.344	907.893	1035.06	930.273
ENSMUSG00000061533	Cep128	75216	centrosomal protein 128	chr12:90998491-91384409	-	0.989806	0.235322	4.20617	2.59734e-05	0.00034267	Yes	OK	173.314	103.041	226.018	91.8708	86.8494	130.404	348.305	145.605	188.327	221.834
ENSMUSG00000025932	Eya1	14048	EYA transcriptional coactivator and phosphatase 1	chr1:14168957-14310199	-	0.954952	0.227097	4.20503	2.61042e-05	0.000344057	Yes	OK	249.175	155.088	319.741	199.332	85.3324	180.599	329.973	295.493	320.745	332.751
ENSMUSG00000082229	Nap1l2	17954	nucleosome assembly protein 1-like 2	chrX:103184058-103186664	-	-1.11869	0.266301	-4.20085	2.6592e-05	0.000350141	Yes	OK	85.9402	129.875	52.9894	162.027	153.598	73.9991	54.9955	40.6839	56.6453	59.6329
ENSMUSG00000000399	Ndufa9	66108	NADH dehydrogenase (ubiquinone) 1 alpha subcomplex, 9	chr6:126821862-126849144	-	-0.60756	0.144701	-4.19872	2.68429e-05	0.000353097	Yes	OK	254.978	323.004	203.958	289.532	347.777	331.702	174.152	203.419	239.087	199.174
ENSMUSG00000063888	Rpl7l1	66229	ribosomal protein L7-like 1	chr17:46773906-46782656	-	-0.537799	0.1281	-4.19829	2.68944e-05	0.000353427	Yes	OK	311.429	383.429	257.43	346.882	392.529	410.876	229.148	265.516	281.02	254.036
ENSMUSG00000002379	Ndufa11	69875	NADH dehydrogenase (ubiquinone) 1 alpha subcomplex 11	chr17:56717761-56724248	+	-0.725746	0.172882	-4.19793	2.69366e-05	0.000353635	Yes	OK	127.11	167.097	97.1197	155.902	189.627	155.76	87.0761	94.2153	92.6924	114.495
ENSMUSG00000024002	Brd4	57261	bromodomain containing 4	chr17:32196271-32284133	-	0.888729	0.211778	4.1965	2.71067e-05	0.00035552	Yes	OK	529.806	343.58	669.476	275.612	243.861	511.266	701.192	665.931	692.986	617.797
ENSMUSG00000040524	Zfp609	214812	zinc finger protein 609	chr9:65691582-65827564	-	0.692676	0.165094	4.19564	2.72101e-05	0.000356526	Yes	OK	446.704	326.725	536.688	282.851	276.098	421.225	481.21	565.292	582.638	517.613
ENSMUSG00000022718	Dgcr8	94223	DiGeorge syndrome critical region gene 8	chr16:18253964-18289168	-	0.583954	0.139189	4.1954	2.72386e-05	0.000356552	Yes	OK	300.011	229.464	352.921	197.105	235.138	256.151	389.551	361.872	350.171	310.091
ENSMUSG00000036661	Dennd3	105841	DENN/MADD domain containing 3	chr15:73512559-73572242	+	0.811385	0.193446	4.19437	2.73627e-05	0.000357826	Yes	OK	96.8153	66.6701	119.424	74.0534	51.9579	73.9991	109.991	124.193	130.211	113.302
ENSMUSG00000025592	Dach2	93837	dachshund 2 (Drosophila)	chrX:113298255-113836386	+	-0.875388	0.208717	-4.19414	2.73909e-05	0.000357845	Yes	OK	89.8002	122.856	65.0082	118.597	120.603	129.369	73.3273	70.6615	74.301	41.743
ENSMUSG00000024594	Prrc1	73137	proline-rich coiled-coil 1	chr18:57354732-57392719	+	0.6827	0.162829	4.19273	2.75615e-05	0.000359724	Yes	OK	183.312	135.387	219.256	133.073	116.811	156.278	192.484	248.386	240.559	195.596
ENSMUSG00000024914	Drap1	66556	Dr1 associated protein 1 (negative cofactor 2 alpha)	chr19:5422803-5424979	-	-0.630622	0.150551	-4.18877	2.80467e-05	0.0003657	Yes	OK	195.043	247.326	155.831	244.989	279.132	217.857	146.655	160.594	166.993	149.082
ENSMUSG00000035235	Trim13	66597	tripartite motif-containing 13	chr14:61599511-61605945	+	1.51316	0.361349	4.18753	2.82002e-05	0.000367343	Yes	OK	13.1181	4.63156	19.483	7.2383	3.03404	3.62233	13.7489	25.6951	20.5983	17.8899
ENSMUSG00000019066	Rab3d	19340	RAB3D, member RAS oncogene family	chr9:21907491-21918183	-	0.938316	0.224145	4.18621	2.8365e-05	0.000369131	Yes	OK	48.3941	29.8807	62.2791	31.7372	29.9611	27.9437	68.7443	66.379	60.3236	53.6696
ENSMUSG00000023175	Bsg	12215	basigin	chr10:79704357-79711979	+	-0.559769	0.133732	-4.18576	2.84214e-05	0.000369505	Yes	OK	1423.7	1758.52	1172.57	1697.1	1873.9	1704.57	967.003	1342.57	1301.37	1079.36
ENSMUSG00000003575	Crtc1	382056	CREB regulated transcription coactivator 1	chr8:70382357-70439573	-	0.639772	0.152929	4.18346	2.87101e-05	0.000372664	Yes	OK	280.29	210.629	332.536	187.082	203.66	241.144	293.309	402.556	342.079	292.201
ENSMUSG00000034055	Phka1	18679	phosphorylase kinase alpha 1	chrX:102513974-102644246	-	-0.702365	0.167894	-4.18339	2.87199e-05	0.000372664	Yes	OK	393.653	509.798	306.545	655.345	408.837	465.211	320.807	295.493	304.561	305.32
ENSMUSG00000051517	Arhgef39	230098	Rho guanine nucleotide exchange factor (GEF) 39	chr4:43496143-43499660	-	1.02326	0.244702	4.18166	2.89384e-05	0.000375134	Yes	OK	62.8697	36.6762	82.5148	24.4989	43.6143	41.9156	100.825	59.9552	84.6002	84.6787
ENSMUSG00000020154	Ptprb	19263	protein tyrosine phosphatase, receptor type, B	chr10:116301373-116389538	+	-0.69728	0.166761	-4.1813	2.89847e-05	0.000375372	Yes	OK	319.365	414.288	248.173	495.545	323.504	423.813	238.314	256.951	274.399	223.027
ENSMUSG00000000959	Oxa1l	69089	oxidase assembly 1-like	chr14:54360840-54369669	+	-0.635799	0.152149	-4.1788	2.93053e-05	0.000378522	Yes	OK	196.571	250.722	155.958	242.205	277.615	232.347	123.74	188.431	162.579	149.082
ENSMUSG00000010721	Lmbr1	56873	limb region 1	chr5:29229801-29378390	-	-0.588673	0.140873	-4.17874	2.93128e-05	0.000378522	Yes	OK	177.378	220.033	145.387	223.274	218.451	218.375	137.489	169.159	135.36	139.541
ENSMUSG00000029153	Ociad2	433904	OCIA domain containing 2	chr5:73322197-73338947	-	-1.21572	0.291098	-4.17631	2.96275e-05	0.000381952	Yes	OK	41.5305	68.1432	21.5709	60.1336	75.4717	68.8243	4.58295	17.1301	32.3688	32.2018
ENSMUSG00000029167	Ppargc1a	19017	peroxisome proliferative activated receptor, gamma, coactivator 1 alpha	chr5:51454248-51553921	-	-1.3905	0.332955	-4.17625	2.96355e-05	0.000381952	Yes	OK	44.0159	75.0895	20.7108	104.677	82.2983	38.2932	13.7489	17.1301	16.1844	35.7797
ENSMUSG00000036381	F630111L10Rik	320463	RIKEN cDNA F630111L10 gene	chr3:59146295-59153628	-	0.811698	0.194399	4.17543	2.97421e-05	0.000382959	Yes	OK	97.8098	65.0708	122.364	62.9176	68.6451	63.6496	160.403	87.7915	108.877	132.385
ENSMUSG00000036381	P2ry14	140795	purinergic receptor P2Y, G-protein coupled, 14	chr3:59114622-59132462	-	0.811698	0.194399	4.17543	2.97421e-05	0.000382959	Yes	OK	97.8098	65.0708	122.364	62.9176	68.6451	63.6496	160.403	87.7915	108.877	132.385
ENSMUSG00000086370	Ftx	78878	Ftx transcript, Xist regulator (non-protein coding)	chrX:103569504-103623754	-	0.976923	0.234027	4.17441	2.98763e-05	0.000384317	Yes	OK	110.157	67.907	141.844	48.9977	61.06	93.6632	128.323	122.052	130.946	186.055
ENSMUSG00000022203	Efs	13644	embryonal Fyn-associated substrate	chr14:54916542-54926788	-	0.652113	0.156365	4.17045	3.03994e-05	0.000390671	Yes	OK	390.772	292.021	464.836	328.508	235.517	312.038	403.3	537.455	420.058	498.531
ENSMUSG00000008301	Phax	56698	phosphorylated adaptor for RNA export	chr18:56572870-56587712	+	-0.638137	0.153052	-4.16941	3.05392e-05	0.000392091	Yes	OK	210.039	268.874	165.913	284.521	284.062	238.039	123.74	194.854	162.579	182.477
ENSMUSG00000037946	Fgd3	30938	FYVE, RhoGEF and PH domain containing 3	chr13:49263109-49309208	-	0.858494	0.205924	4.16899	3.05957e-05	0.00039244	Yes	OK	68.6574	45.121	86.3097	53.4521	37.9255	43.9855	96.242	81.3678	85.3358	82.2934
ENSMUSG00000020359	Phykpl	72947	5-phosphohydroxy-L-lysine phospholyase	chr11:51584756-51603269	+	0.80823	0.194015	4.16582	3.10234e-05	0.000397545	Yes	OK	186.21	126.756	230.8	87.9732	130.843	161.453	242.897	203.419	238.352	238.532
ENSMUSG00000032815	Fanca	14087	Fanconi anemia, complementation group A	chr8:123268243-123318576	-	1.01497	0.243674	4.1653	3.10949e-05	0.000398081	Yes	OK	145.454	86.0004	190.044	45.1002	95.9515	116.95	206.233	190.572	186.856	176.513
ENSMUSG00000017707	Serinc3	26943	serine incorporator 3	chr2:163623272-163645143	-	-0.778108	0.186888	-4.1635	3.13403e-05	0.000400597	Yes	OK	951.252	1270.74	711.637	1670.38	1080.5	1061.34	609.533	610.258	856.301	770.457
ENSMUSG00000047037	Nipa1	233280	non imprinted in Prader-Willi/Angelman syndrome 1 homolog (human)	chr7:55978483-56019573	-	-0.891818	0.214203	-4.16342	3.13513e-05	0.000400597	Yes	OK	127.769	178.322	89.8544	219.376	174.837	140.753	64.1614	126.334	89.0141	79.9081
ENSMUSG00000026207	Speg	11790	SPEG complex locus	chr1:75375296-75432306	+	0.87593	0.210452	4.16213	3.15293e-05	0.000402441	Yes	OK	193.209	125.986	243.627	173.719	101.261	102.978	247.48	263.375	190.534	273.119
ENSMUSG00000051469	Zfp24	59057	zinc finger protein 24	chr18:24012266-24020771	-	-0.44676	0.107348	-4.1618	3.15744e-05	0.000402441	Yes	OK	813.696	967.411	698.41	943.207	975.823	983.204	650.78	646.66	774.643	721.558
ENSMUSG00000025016	Tm9sf3	107358	transmembrane 9 superfamily member 3	chr19:41210841-41264004	-	-0.519537	0.12484	-4.16161	3.16017e-05	0.000402441	Yes	OK	1976.53	2404.41	1655.61	2603.56	2361.24	2248.43	1498.63	1698.02	1907.55	1518.25
ENSMUSG00000029017	Pmpcb	73078	peptidase (mitochondrial processing) beta	chr5:21737159-21757152	+	-0.542581	0.130381	-4.1615	3.16159e-05	0.000402441	Yes	OK	257.253	313.359	215.174	306.236	340.95	292.891	238.314	192.713	212.604	217.064
ENSMUSG00000022833	Ccdc14	239839	coiled-coil domain containing 14	chr16:34690615-34725194	+	0.805902	0.193669	4.16122	3.16547e-05	0.000402553	Yes	OK	77.1276	53.4377	94.8951	55.1225	49.3031	55.8874	73.3273	117.769	97.8419	90.642
ENSMUSG00000019087	Atp6ap1	54411	ATPase, H+ transporting, lysosomal accessory protein 1	chrX:74297096-74304721	+	-0.671028	0.161547	-4.15376	3.27056e-05	0.000415522	Yes	OK	631.562	811.853	496.344	1022.27	762.302	650.985	439.964	513.902	493.624	537.889
ENSMUSG00000022999	Lmbr1l	74775	limb region 1 like	chr15:98903920-98918098	-	0.909157	0.218892	4.15345	3.27496e-05	0.000415687	Yes	OK	75.448	49.1182	95.1953	36.7483	50.0616	60.5447	82.4932	85.6503	108.877	103.761
ENSMUSG00000042708	Shcbp1l	71836	Shc SH2-domain binding protein 1-like	chr1:153425208-153452574	+	1.43519	0.34579	4.15048	3.31784e-05	0.000420731	Yes	OK	15.5472	5.82085	22.8419	5.01113	4.1718	8.27962	27.4977	23.5538	17.6557	22.6605
ENSMUSG00000034928	Rnf44	105239	ring finger protein 44	chr13:54679398-54687808	-	0.669281	0.161329	4.14855	3.34582e-05	0.000423878	Yes	OK	333.094	244.877	399.258	204.9	217.692	312.038	421.632	408.98	394.31	372.109
ENSMUSG00000078853	Igtp	16145	interferon gamma induced GTPase	chr11:58199555-58207592	+	1.62735	0.392295	4.14829	3.34969e-05	0.000423966	Yes	OK	486.216	106.848	770.741	129.733	55.7505	135.061	1425.3	244.103	587.052	826.512
ENSMUSG00000050240	Hic2	58180	hypermethylated in cancer 2	chr16:17233586-17263430	+	1.15177	0.277712	4.14735	3.36345e-05	0.000425307	Yes	OK	84.4224	45.3625	113.717	49.5545	39.4425	47.0903	100.825	89.9328	72.0941	192.018
ENSMUSG00000024286	Ccny	67974	cyclin Y	chr18:9314043-9450150	-	-0.479191	0.115592	-4.14555	3.39002e-05	0.000428261	Yes	OK	482.28	577.864	410.592	579.064	624.633	529.895	394.134	434.675	425.943	387.614
ENSMUSG00000006782	Cnp	12799	2',3'-cyclic nucleotide 3' phosphodiesterase	chr11:100574938-100581739	+	-0.532444	0.128475	-4.14435	3.40773e-05	0.000429892	Yes	OK	1088.02	1328.66	907.541	1493.32	1170	1322.67	916.591	852.22	1018.14	843.209
ENSMUSG00000035437	Rabgap1	227800	RAB GTPase activating protein 1	chr2:37443284-37566437	+	-0.444986	0.107374	-4.14425	3.40934e-05	0.000429892	Yes	OK	648.113	770.968	555.973	793.986	770.646	748.27	472.044	603.834	567.189	580.824
ENSMUSG00000020634	Ubxn2a	217379	UBX domain protein 2A	chr12:4879031-4907520	-	-0.729031	0.175952	-4.14336	3.42261e-05	0.000431158	Yes	OK	141.418	185.125	108.638	214.922	190.386	150.068	105.408	113.487	105.934	109.724
ENSMUSG00000047155	Cyp4x1	81906	cytochrome P450, family 4, subfamily x, polypeptide 1	chr4:115108681-115133977	-	1.50039	0.362141	4.14312	3.42612e-05	0.000431196	Yes	OK	22.6756	7.54121	34.0264	11.6926	8.34361	2.58738	36.6636	51.3902	30.1618	17.8899
ENSMUSG00000028820	Sfpq	71514	splicing factor proline/glutamine rich (polypyrimidine tract binding protein associated)	chr4:127021300-127037014	+	0.472883	0.114171	4.14187	3.44484e-05	0.000433144	Yes	OK	1693.21	1382.58	1926.18	1230.51	1437.76	1479.46	1791.94	1830.77	2047.32	2034.67
ENSMUSG00000018567	Gabarap	56486	gamma-aminobutyric acid receptor associated protein	chr11:69991369-69994949	+	-0.576801	0.139353	-4.13913	3.48629e-05	0.000437945	Yes	OK	505.463	628.06	413.515	744.432	592.775	546.972	380.385	449.664	424.472	399.54
ENSMUSG00000029999	Tgfa	21802	transforming growth factor alpha	chr6:86195226-86275743	+	-0.558228	0.1349	-4.1381	3.5019e-05	0.000439494	Yes	OK	1240.6	1529.61	1023.84	1701.56	1312.6	1574.68	953.255	1113.45	1117.46	911.19
ENSMUSG00000025544	Tm9sf2	68059	transmembrane 9 superfamily member 2	chr14:122107081-122159603	+	-0.473912	0.114632	-4.1342	3.56196e-05	0.000446613	Yes	OK	710.673	850.524	605.784	797.884	866.218	887.471	618.699	522.467	651.053	630.916
ENSMUSG00000031634	Ufsp2	192169	UFM1-specific peptidase 2	chr8:45975527-45996956	+	-0.692253	0.167458	-4.1339	3.56658e-05	0.000446774	Yes	OK	148.745	193.673	115.048	201.559	209.728	169.732	114.574	94.2153	130.946	120.458
ENSMUSG00000028957	Per3	18628	period circadian clock 3	chr4:151003654-151044665	-	0.89241	0.216019	4.13116	3.60931e-05	0.000451704	Yes	OK	178.082	113.372	226.615	143.096	116.811	80.2088	297.892	188.431	178.028	242.109
ENSMUSG00000021796	Bmpr1a	12166	bone morphogenetic protein receptor, type 1A	chr14:34411067-34502546	-	-0.440674	0.106733	-4.12875	3.64739e-05	0.000456044	Yes	OK	792.129	938.436	682.399	898.106	938.656	978.547	659.945	620.964	737.861	710.824
ENSMUSG00000029467	Atp2a2	11938	ATPase, Ca++ transporting, cardiac muscle, slow twitch 2	chr5:122453512-122502225	-	-0.514204	0.12458	-4.12751	3.66706e-05	0.000458075	Yes	OK	2215.27	2690.79	1858.63	2499.44	2938.47	2634.47	1549.04	1978.52	1925.94	1981
ENSMUSG00000020646	Mboat2	67216	membrane bound O-acyltransferase domain containing 2	chr12:24831598-24960299	+	-0.609754	0.147746	-4.12704	3.6746e-05	0.000458589	Yes	OK	560.416	702.971	453.499	858.017	658.387	592.51	472.044	417.545	475.968	448.439
ENSMUSG00000102252	Snrpn	20646	small nuclear ribonucleoprotein N	chr7:59982501-60097608	-	-0.794765	0.19264	-4.12565	3.69693e-05	0.000460946	Yes	OK	334.855	451.809	247.14	437.639	585.57	332.22	187.901	261.233	266.307	273.119
ENSMUSG00000039530	Tusc3	80286	tumor suppressor candidate 3	chr8:39005866-39130817	+	-0.579582	0.140578	-4.12286	3.74199e-05	0.000465492	Yes	OK	250.514	311.978	204.415	282.851	353.466	299.619	183.318	216.267	198.626	219.449
ENSMUSG00000003847	Nfat5	54446	nuclear factor of activated T cells 5	chr8:107293469-107379517	+	0.605219	0.1468	4.12275	3.74382e-05	0.000465492	Yes	OK	799.797	610.103	942.067	714.365	476.344	639.6	985.335	884.339	975.477	923.117
ENSMUSG00000102049	Zbed6	667118	zinc finger, BED type containing 6	chr1:133655878-133660885	-	0.778839	0.18901	4.12061	3.77868e-05	0.000469117	Yes	OK	597.422	413.901	735.063	360.802	314.782	566.119	802.017	623.106	786.414	728.714
ENSMUSG00000053702	Nebl	74103	nebulette	chr2:17346733-17731068	-	-0.621522	0.150835	-4.12053	3.77998e-05	0.000469117	Yes	OK	920.604	1163.56	738.39	1086.3	1028.92	1375.45	678.277	650.942	881.313	743.026
ENSMUSG00000032038	St3gal4	20443	ST3 beta-galactoside alpha-2,3-sialyltransferase 4	chr9:35046578-35116810	-	0.622598	0.151125	4.11975	3.79289e-05	0.000470283	Yes	OK	281.525	210.639	334.69	172.606	230.587	228.724	362.053	368.296	303.089	305.32
ENSMUSG00000037112	Sik2	235344	salt inducible kinase 2	chr9:50892800-51009073	-	0.717758	0.174239	4.11939	3.79875e-05	0.000470575	Yes	OK	264.565	192.843	318.356	221.047	153.598	203.886	247.48	295.493	352.378	378.072
ENSMUSG00000028256	Odf2l	52184	outer dense fiber of sperm tails 2-like	chr3:145118599-145153915	+	0.731	0.177483	4.11869	3.81029e-05	0.000471568	Yes	OK	135.176	97.043	163.777	78.5077	102.399	110.222	160.403	137.04	178.764	178.899
ENSMUSG00000031465	Angpt2	11601	angiopoietin 2	chr8:18690262-18741562	-	-0.660885	0.160539	-4.11665	3.84414e-05	0.000475317	Yes	OK	357.348	457.496	282.238	461.024	490.756	420.708	302.475	224.832	352.378	249.265
ENSMUSG00000021905	Dph3	105638	diphthamine biosynthesis 3	chr14:32080516-32085692	-	-0.602628	0.146424	-4.11564	3.86101e-05	0.000476963	Yes	OK	165.924	205.543	136.21	195.434	223.002	198.193	151.238	132.758	127.268	133.578
ENSMUSG00000027428	Rbbp9	26450	retinoblastoma binding protein 9	chr2:144542264-144550859	-	-0.843856	0.205047	-4.11543	3.86457e-05	0.000476963	Yes	OK	145.81	197.866	106.769	261.692	179.767	152.138	119.157	104.922	105.198	97.7979
ENSMUSG00000022428	Cby1	73739	chibby homolog 1 (Drosophila)	chr15:79659226-79667660	+	-0.793124	0.192804	-4.11362	3.89508e-05	0.000480286	Yes	OK	90.724	122.097	67.1946	123.608	139.187	103.495	59.5784	72.8027	68.4158	67.9815
ENSMUSG00000086330	1700007J10Rik	69320	RIKEN cDNA 1700007J10 gene	chr11:59725916-59740154	-	1.52087	0.369809	4.11259	3.9125e-05	0.00048199	Yes	OK	16.6643	5.17696	25.2799	5.01113	3.79255	6.72719	22.9148	44.9664	11.7705	21.4678
ENSMUSG00000004865	Srpk1	20815	serine/arginine-rich protein specific kinase 1	chr17:28589591-28622454	-	0.469418	0.11423	4.10941	3.96665e-05	0.000488211	Yes	OK	395.536	321.922	450.746	300.111	330.331	335.324	476.627	436.816	474.497	415.045
ENSMUSG00000026004	Kansl1l	68691	KAT8 regulatory NSL complex subunit 1-like	chr1:66719242-66817595	-	0.608873	0.14823	4.10762	3.99757e-05	0.000491565	Yes	OK	146.89	113.553	171.892	118.04	111.88	110.74	142.072	179.866	173.614	192.018
ENSMUSG00000001911	Nfix	18032	nuclear factor I/X	chr8:84704711-84774369	-	0.671902	0.163606	4.10683	4.01132e-05	0.000492525	Yes	OK	784.645	576.241	940.948	708.797	433.109	586.818	1063.25	914.317	904.854	881.374
ENSMUSG00000002346	Slc25a42	73095	solute carrier family 25, member 42	chr8:70184339-70212281	-	0.984783	0.239796	4.10675	4.01273e-05	0.000492525	Yes	OK	62.7629	36.8806	82.1746	42.873	34.1329	33.6359	96.242	102.78	58.1166	71.5595
ENSMUSG00000022108	Itm2b	16432	integral membrane protein 2B	chr14:73362231-73385271	-	-0.775908	0.189327	-4.09824	4.16296e-05	0.000510496	Yes	OK	1849.39	2462.1	1389.86	3304.01	2358.59	1723.71	1434.46	1254.78	1398.48	1471.74
ENSMUSG00000068115	Ninl	78177	ninein-like	chr2:150934518-151009398	-	0.9326	0.227626	4.09708	4.18398e-05	0.000512605	Yes	OK	106.847	66.7291	136.936	55.1225	59.1638	85.901	128.323	177.724	98.5776	143.119
ENSMUSG00000015733	Capza2	12343	capping protein (actin filament) muscle Z-line, alpha 2	chr6:17637097-17666536	+	-0.440737	0.107617	-4.09544	4.21367e-05	0.00051577	Yes	OK	875.132	1032.07	757.429	1032.29	1077.08	986.827	774.519	777.276	804.069	673.852
ENSMUSG00000027351	Spred1	114715	sprouty protein with EVH-1 domain 1, related sequence	chr2:117121070-117182277	+	-0.559494	0.13665	-4.09437	4.2332e-05	0.000517688	Yes	OK	1870.68	2304.34	1545.43	2721.6	1968.33	2223.08	1622.37	1445.35	1653.01	1461.01
ENSMUSG00000040560	Wdr7	104082	WD repeat domain 7	chr18:63708694-63989759	+	-0.467032	0.114083	-4.09378	4.24403e-05	0.000518538	Yes	OK	648.253	779.034	550.167	795.657	769.887	771.557	444.547	590.987	591.466	573.668
ENSMUSG00000031639	Tlr3	142980	toll-like receptor 3	chr8:45395664-45410539	-	0.941413	0.230087	4.09156	4.28487e-05	0.000522335	Yes	OK	124.071	78.2441	158.441	100.223	56.8882	77.6214	146.655	132.758	136.096	218.256
ENSMUSG00000006010	BC003331	226499	cDNA sequence BC003331	chr1:150361310-150393055	-	-0.732608	0.179061	-4.09139	4.28793e-05	0.000522335	Yes	OK	207.661	273.649	158.171	317.372	285.2	218.375	160.403	122.052	177.293	172.935
ENSMUSG00000032783	Troap	78733	trophinin associated protein	chr15:99074972-99083409	+	1.0538	0.257571	4.09129	4.28974e-05	0.000522335	Yes	OK	89.2337	51.5751	117.478	27.8396	56.509	70.3767	105.408	115.628	108.141	140.734
ENSMUSG00000046447	Camk2n1	66259	calcium/calmodulin-dependent protein kinase II inhibitor 1	chr4:138455147-138460126	+	-0.645933	0.157883	-4.09121	4.29137e-05	0.000522335	Yes	OK	312.224	400.027	246.372	473.274	354.224	372.583	210.816	231.256	246.444	296.972
ENSMUSG00000062209	Erbb4	13869	erb-b2 receptor tyrosine kinase 4	chr1:68032186-69108059	-	-0.848707	0.207464	-4.09087	4.29759e-05	0.000522335	Yes	OK	864.654	1180.61	627.683	1703.23	880.251	958.366	669.111	685.202	630.455	525.962
ENSMUSG00000033629	Hacd3	57874	3-hydroxyacyl-CoA dehydratase 3	chr9:64986982-65021717	-	-0.413951	0.10119	-4.09082	4.29851e-05	0.000522335	Yes	OK	738.132	863.679	643.971	869.71	811.606	909.723	637.031	653.083	667.973	617.797
ENSMUSG00000048109	Rbm15	229700	RNA binding motif protein 15	chr3:107326109-107333289	-	0.715514	0.174923	4.09045	4.30538e-05	0.000522696	Yes	OK	437.066	313.629	529.643	236.637	289.751	414.498	549.955	531.032	541.441	496.146
ENSMUSG00000019906	Lin7a	108030	lin-7 homolog A (C. elegans)	chr10:107272393-107425143	+	-1.11057	0.271559	-4.0896	4.32115e-05	0.000524135	Yes	OK	63.2721	94.7183	39.6874	110.245	109.225	64.6845	41.2466	38.5426	26.4835	52.4769
ENSMUSG00000073987	Ggh	14590	gamma-glutamyl hydrolase	chr4:20042051-20066111	+	-0.702114	0.171785	-4.08717	4.3667e-05	0.000529181	Yes	OK	140.7	179.544	111.566	204.343	171.802	162.487	142.072	100.639	108.141	95.4126
ENSMUSG00000055653	Gpc3	14734	glypican 3	chrX:52272426-52613974	-	1.47136	0.360496	4.0815	4.47468e-05	0.000541776	Yes	OK	20.2522	6.59075	30.4983	8.90868	5.68882	5.17476	45.8295	42.8251	15.4487	17.8899
ENSMUSG00000040867	Begain	380785	brain-enriched guanylate kinase-associated	chr12:109032181-109068217	-	1.1599	0.284317	4.07959	4.51153e-05	0.000545744	Yes	OK	50.8831	26.55	69.1329	25.0557	27.6856	26.9088	64.1614	81.3678	36.7827	94.2199
ENSMUSG00000028248	Pnisr	66625	PNN interacting serine/arginine-rich	chr4:21847582-21876475	+	0.670483	0.164387	4.07868	4.52929e-05	0.000547399	Yes	OK	726.447	534.711	870.249	584.632	512.373	507.127	962.42	633.812	826.875	1057.89
ENSMUSG00000020326	Ccng1	12450	cyclin G1	chr11:40748551-40755286	-	-0.661198	0.162168	-4.07725	4.55716e-05	0.00055027	Yes	OK	315.995	404.686	249.477	505.568	351.949	356.541	247.48	229.114	249.387	271.926
ENSMUSG00000031988	Vps26b	69091	VPS26 retromer complex component B	chr9:27004501-27030094	-	-0.451543	0.110772	-4.07631	4.5756e-05	0.000551999	Yes	OK	481.223	570.95	413.928	551.225	581.019	580.608	380.385	471.076	408.288	395.962
ENSMUSG00000076433	BC100451	58251	cDNA sequence BC100451	chr11:118332359-118342534	-	1.38104	0.338938	4.07463	4.60884e-05	0.000555508	Yes	OK	14.8414	5.83526	21.596	6.12472	5.68882	5.69224	27.4977	21.4126	18.3913	19.0825
ENSMUSG00000021306	Gpr137b	83924	G protein-coupled receptor 137B	chr13:13357619-13393624	-	-1.32843	0.326126	-4.07337	4.6337e-05	0.000558003	Yes	OK	42.5051	67.6667	23.634	100.779	54.6127	47.6078	45.8295	14.9888	20.5983	13.1192
ENSMUSG00000037995	Igsf9	93842	immunoglobulin superfamily, member 9	chr1:172482316-172498877	+	1.20839	0.296708	4.07264	4.64827e-05	0.000559254	Yes	OK	37.7979	19.0911	51.828	29.51	13.2739	14.4893	54.9955	44.9664	44.1392	63.2109
ENSMUSG00000034460	Six4	20474	sine oculis-related homeobox 4	chr12:73100258-73113245	-	0.826793	0.203069	4.07149	4.67135e-05	0.000561526	Yes	OK	85.8323	57.8508	106.818	50.6681	56.1297	66.7544	109.991	87.7915	97.1063	132.385
ENSMUSG00000035199	Arl6ip5	65106	ADP-ribosylation factor-like 6 interacting protein 5	chr6:97210791-97233315	+	-0.537345	0.132024	-4.07006	4.70003e-05	0.000564467	Yes	OK	235.62	288.938	195.631	311.804	287.475	267.535	178.735	216.267	197.891	189.633
ENSMUSG00000051242	Pcdhb9	93880	protocadherin beta 9	chr18:37400854-37403909	+	-0.98681	0.24258	-4.06798	4.74227e-05	0.000568845	Yes	OK	58.2097	85.1922	37.9729	105.791	67.5074	82.2787	27.4977	42.8251	43.4036	38.165
ENSMUSG00000026775	Yme1l1	27377	YME1-like 1 (S. cerevisiae)	chr2:23156504-23199260	+	-0.462402	0.113672	-4.06785	4.74498e-05	0.000568845	Yes	OK	634.59	758.18	541.898	724.944	808.571	741.026	522.457	486.065	587.787	571.283
ENSMUSG00000054364	Rhob	11852	ras homolog family member B	chr12:8497758-8499985	-	-0.632321	0.155455	-4.06755	4.75094e-05	0.00056905	Yes	OK	600.476	765.091	477.015	854.677	667.489	773.109	339.139	556.727	511.279	500.916
ENSMUSG00000047139	Cd24a	12484	CD24a antigen	chr10:43579168-43584265	+	-0.993347	0.244262	-4.06673	4.76775e-05	0.000570554	Yes	OK	143.302	206.999	95.5286	262.249	232.483	126.264	87.0761	94.2153	77.9793	122.844
ENSMUSG00000075702	Selm	114679	selenoprotein M	chr11:3514701-3517351	+	-0.644685	0.158602	-4.06479	4.80751e-05	0.00057419	Yes	OK	158.362	204.495	123.762	202.116	211.624	199.746	82.4932	154.17	133.153	125.229
ENSMUSG00000047044	D030056L22Rik	225995	RIKEN cDNA D030056L22 gene	chr19:18713235-18718428	+	-0.866642	0.213209	-4.06475	4.80837e-05	0.00057419	Yes	OK	68.7678	93.8325	49.9693	81.8485	103.916	95.7331	54.9955	44.9664	42.6679	57.2476
ENSMUSG00000059734	Ndufs8	225887	NADH dehydrogenase (ubiquinone) Fe-S protein 8	chr19:3908862-3912774	-	-0.572674	0.140892	-4.06462	4.811e-05	0.00057419	Yes	OK	199.364	247.696	163.115	229.399	273.064	240.626	160.403	152.029	170.672	169.357
ENSMUSG00000042942	Greb1l	381157	growth regulation by estrogen in breast cancer-like	chr18:10325178-10562941	+	1.02085	0.251177	4.06428	4.81803e-05	0.000574517	Yes	OK	49.2388	29.1679	64.292	23.9421	31.4782	32.0835	45.8295	89.9328	52.2314	69.1741
ENSMUSG00000028199	Cryz	12972	crystallin, zeta	chr3:154596710-154623182	+	-0.726526	0.178788	-4.06361	4.83195e-05	0.000575665	Yes	OK	95.9972	127.884	72.082	128.062	129.326	126.264	59.5784	70.6615	85.3358	72.7521
ENSMUSG00000022762	Ncam2	17968	neural cell adhesion molecule 2	chr16:81200696-81597805	+	-0.726911	0.178938	-4.06235	4.85803e-05	0.000578257	Yes	OK	978.296	1278.81	752.91	1670.38	1085.05	1081.01	847.847	668.072	844.53	651.191
ENSMUSG00000006304	Arpc2	76709	actin related protein 2/3 complex, subunit 2	chr1:74236549-74268213	+	-0.487306	0.119971	-4.06188	4.86793e-05	0.00057892	Yes	OK	560.726	672.235	477.093	646.436	759.648	610.622	476.627	498.913	470.083	462.751
ENSMUSG00000002608	Ccdc97	52132	coiled-coil domain containing 97	chr7:25711116-25719053	-	0.646842	0.159446	4.05682	4.97457e-05	0.000591078	Yes	OK	155.415	116.043	184.945	107.461	103.537	137.131	178.735	194.854	176.557	189.633
ENSMUSG00000027642	Rpn2	20014	ribophorin II	chr2:157279097-157326318	+	-0.434211	0.107046	-4.0563	4.98558e-05	0.000591376	Yes	OK	1180.69	1397.37	1018.18	1372.49	1390.35	1429.27	884.51	997.826	1083.62	1106.79
ENSMUSG00000033910	Gucy1a3	60596	guanylate cyclase 1, soluble, alpha 3	chr3:82092426-82145877	-	-1.02491	0.252673	-4.05629	4.98592e-05	0.000591376	Yes	OK	324.146	473.078	212.447	760.022	373.566	285.647	197.067	250.527	193.477	208.715
ENSMUSG00000032458	Copb2	50797	coatomer protein complex, subunit beta 2 (beta prime)	chr9:98563730-98588375	+	-0.462211	0.114001	-4.05444	5.0255e-05	0.000595543	Yes	OK	808.957	967.196	690.278	964.921	1041.43	895.234	618.699	680.92	761.402	700.09
ENSMUSG00000020185	E2f7	52679	E2F transcription factor 7	chr10:110745464-110787384	+	1.16955	0.288567	4.05295	5.05758e-05	0.000598456	Yes	OK	138.592	71.5772	188.854	27.2828	83.4361	104.013	224.565	177.724	161.108	192.018
ENSMUSG00000032279	Idh3a	67834	isocitrate dehydrogenase 3 (NAD+) alpha	chr9:54586510-54604662	+	-0.789248	0.194737	-4.05288	5.05901e-05	0.000598456	Yes	OK	498.061	665.232	372.683	443.764	824.879	727.054	380.385	426.11	363.413	320.825
ENSMUSG00000025035	Arl3	56350	ADP-ribosylation factor-like 3	chr19:46531108-46573085	-	-0.699552	0.17267	-4.05139	5.09143e-05	0.00060176	Yes	OK	118.403	152.551	92.7928	150.891	170.665	136.096	96.242	92.074	83.8645	98.9906
ENSMUSG00000028556	Dock7	67299	dedicator of cytokinesis 7	chr4:98936658-99120915	-	1.03293	0.255192	4.04767	5.17295e-05	0.000610855	Yes	OK	667.7	391.507	874.846	217.149	391.77	565.601	563.703	839.373	1096.86	999.447
ENSMUSG00000090053	Palm2	242481	paralemmin 2	chr4:57568247-57717128	+	1.35787	0.335538	4.04686	5.19086e-05	0.00061243	Yes	OK	33.0695	13.6586	47.6277	4.45434	20.4798	16.0418	54.9955	38.5426	39.7253	57.2476
ENSMUSG00000002688	Prkd1	18760	protein kinase D1	chr12:50341231-50649223	-	-0.76828	0.189899	-4.04574	5.21589e-05	0.000614842	Yes	OK	198.375	261.18	151.272	332.962	238.931	211.648	178.735	154.17	149.338	122.844
ENSMUSG00000001175	Calm1	12313	calmodulin 1	chr12:100200143-100209824	+	-0.591581	0.146241	-4.04525	5.22664e-05	0.000615566	Yes	OK	2648.46	3300.9	2159.14	3653.67	3664.74	2584.28	2213.57	2023.49	2117.95	2281.55
ENSMUSG00000021738	Atxn7	246103	ataxin 7	chr14:14012490-14107301	+	0.591487	0.146339	4.04191	5.30181e-05	0.000623871	Yes	OK	158.086	120.99	185.907	113.029	116.431	133.509	183.318	201.278	176.557	182.477
ENSMUSG00000027829	Ccnl1	56706	cyclin L1	chr3:65946150-65958225	-	0.592807	0.146692	4.04118	5.31827e-05	0.000625259	Yes	OK	279.893	216.649	327.326	208.797	199.488	241.661	316.224	267.657	360.47	364.953
ENSMUSG00000038607	Gng10	14700	guanine nucleotide binding protein (G protein), gamma 10	chr4:59035155-59041899	+	-0.57386	0.142041	-4.0401	5.34294e-05	0.000627607	Yes	OK	205.351	254.417	168.551	247.216	272.305	243.731	164.986	182.007	181.706	145.504
ENSMUSG00000079481	Nhsl2	100042480	NHS-like 2	chrX:101849384-102092055	+	-0.511905	0.126794	-4.03731	5.40667e-05	0.000634538	Yes	OK	253.874	305.909	214.848	295.657	296.577	325.492	233.731	199.137	202.305	224.22
ENSMUSG00000025337	Sbds	66711	Shwachman-Bodian-Diamond syndrome homolog (human)	chr5:130245731-130255530	-	-0.627568	0.155478	-4.03638	5.42826e-05	0.000636514	Yes	OK	164.095	208.419	130.852	227.171	215.417	182.669	114.574	139.182	126.532	143.119
ENSMUSG00000031537	Ikbkb	16150	inhibitor of kappaB kinase beta	chr8:22659204-22706583	-	0.549767	0.136225	4.03572	5.44353e-05	0.000637746	Yes	OK	328.293	257.074	381.706	260.579	231.725	278.92	398.717	351.166	342.815	434.127
ENSMUSG00000037720	Tmem33	67878	transmembrane protein 33	chr5:67260564-67291461	+	-0.526975	0.130594	-4.03523	5.45497e-05	0.000638461	Yes	OK	599.431	729.697	501.731	858.574	661.421	669.097	522.457	477.5	512.015	494.953
ENSMUSG00000001383	Zmat2	66492	zinc finger, matrin type 2	chr18:36793922-36799660	+	-0.61109	0.151446	-4.03505	5.45917e-05	0.000638461	Yes	OK	185.758	231.53	151.429	232.739	254.859	206.99	174.152	128.475	145.659	157.431
ENSMUSG00000000325	Arvcf	11877	armadillo repeat gene deleted in velo-cardio-facial syndrome	chr16:18348181-18407074	+	0.694809	0.17221	4.03466	5.46809e-05	0.000638945	Yes	OK	315.948	230.37	380.131	291.203	170.665	229.242	371.219	368.296	395.782	385.228
ENSMUSG00000026383	Epb41l5	226352	erythrocyte membrane protein band 4.1 like 5	chr1:119545032-119649000	-	0.601003	0.149089	4.03118	5.54983e-05	0.000647932	Yes	OK	134.895	102.905	158.888	105.234	100.503	102.978	151.238	177.724	151.545	155.045
ENSMUSG00000016624	Phf21b	271305	PHD finger protein 21B	chr15:84785375-84856129	-	0.678054	0.168259	4.02983	5.5816e-05	0.000651074	Yes	OK	94.0044	69.5695	112.331	67.9287	70.9207	69.8593	100.825	117.769	116.233	114.495
ENSMUSG00000055436	Srsf11	69207	serine/arginine-rich splicing factor 11	chr3:158010492-158036639	-	0.504348	0.125191	4.02865	5.60987e-05	0.000653801	Yes	OK	666.468	533.557	766.151	494.989	561.297	544.385	852.43	635.953	822.461	753.76
ENSMUSG00000031357	Syap1	67043	synapse associated protein 1	chrX:162856842-162888462	-	-0.656343	0.162962	-4.02759	5.63522e-05	0.000656185	Yes	OK	150.121	190.403	119.909	192.093	207.832	171.285	128.323	111.345	105.198	134.77
ENSMUSG00000029607	Ankrd61	66729	ankyrin repeat domain 61	chr5:143890740-143895067	-	1.4779	0.36698	4.0272	5.64443e-05	0.000656686	Yes	OK	12.5935	4.07648	18.9814	2.22717	3.79255	6.20971	27.4977	14.9888	19.127	14.3119
ENSMUSG00000066892	Fbxl12	30843	F-box and leucine-rich repeat protein 12	chr9:20637748-20642806	-	0.990858	0.246153	4.02538	5.68841e-05	0.000661228	Yes	OK	40.6615	24.8952	52.4863	21.1581	23.5138	30.0136	41.2466	59.9552	51.4958	57.2476
ENSMUSG00000022382	Wnt7b	22422	wingless-type MMTV integration site family, member 7B	chr15:85535436-85581821	-	-0.721863	0.179421	-4.02329	5.73899e-05	0.000666314	Yes	OK	224.117	293.08	172.395	282.294	253.342	343.604	155.82	216.267	183.913	133.578
ENSMUSG00000041164	Zmiz2	52915	zinc finger, MIZ-type containing 2	chr11:6395124-6406162	+	0.705232	0.175293	4.02317	5.74211e-05	0.000666314	Yes	OK	338.248	244.75	408.371	196.548	214.279	323.423	375.802	451.805	397.989	407.889
ENSMUSG00000021702	Thbs4	21828	thrombospondin 4	chr13:92751585-92794818	-	1.1169	0.277658	4.02257	5.75658e-05	0.000667415	Yes	OK	38.1009	20.8507	51.0386	25.6125	13.6532	23.2864	45.8295	66.379	47.8175	44.1283
ENSMUSG00000028476	Reck	53614	reversion-inducing-cysteine-rich protein with kazal motifs	chr4:43875529-43944806	+	0.870551	0.216458	4.02181	5.77535e-05	0.000669011	Yes	OK	56.5981	37.1749	71.1655	37.3051	34.8915	39.3282	77.9102	59.9552	82.3932	64.4035
ENSMUSG00000037364	Srrt	83701	serrate RNA effector molecule homolog (Arabidopsis)	chr5:137295703-137307674	-	0.418444	0.104055	4.02137	5.78606e-05	0.000669672	Yes	OK	737.036	613.956	829.345	634.744	588.224	618.901	884.51	800.83	761.402	870.64
ENSMUSG00000040234	Tm7sf3	67623	transmembrane 7 superfamily member 3	chr6:146602275-146634592	-	-0.615615	0.153181	-4.01886	5.84793e-05	0.000675875	Yes	OK	877.915	1110.9	703.177	1092.43	1075.95	1164.32	522.457	734.451	878.37	677.429
ENSMUSG00000053199	Arhgap20	244867	Rho GTPase activating protein 20	chr9:51765351-51853059	+	-0.611626	0.152192	-4.01879	5.84974e-05	0.000675875	Yes	OK	225.788	282.224	183.461	330.178	258.273	258.221	192.484	196.996	180.971	163.394
ENSMUSG00000003665	Has1	15116	hyaluronan synthase1	chr17:17843325-17855188	-	1.28423	0.319838	4.01524	5.93844e-05	0.000684983	Yes	OK	28.4521	13.9014	39.3651	20.0445	8.72286	12.9369	22.9148	38.5426	56.6453	39.3577
ENSMUSG00000036257	Pnpla8	67452	patatin-like phospholipase domain containing 8	chr12:44269153-44313435	+	-0.641197	0.159693	-4.01519	5.93987e-05	0.000684983	Yes	OK	336.679	427.525	268.545	526.169	410.733	345.674	274.977	248.386	272.927	277.889
ENSMUSG00000039463	Slc9a8	77031	solute carrier family 9 (sodium/hydrogen exchanger), member 8	chr2:167421709-167477000	+	0.780966	0.194511	4.01503	5.94392e-05	0.000684983	Yes	OK	170.018	117.107	209.7	82.9621	119.845	148.516	210.816	231.256	211.868	184.862
ENSMUSG00000043987	Cep164	214552	centrosomal protein 164	chr9:45766945-45828638	-	0.717671	0.178799	4.01386	5.9735e-05	0.0006878	Yes	OK	245.643	174.819	298.761	158.686	142.221	223.55	357.47	254.81	281.02	301.742
ENSMUSG00000006281	Tep1	21745	telomerase associated protein 1	chr14:50824060-50870554	-	0.955259	0.238032	4.01316	5.9912e-05	0.000689245	Yes	OK	107.916	64.9658	140.128	76.8374	46.6484	71.4117	210.816	109.204	133.153	107.339
ENSMUSG00000029406	Pitpnm2	19679	phosphatidylinositol transfer protein, membrane-associated 2	chr5:124118688-124187182	-	0.672726	0.16769	4.01173	6.0275e-05	0.000692826	Yes	OK	342.425	252.786	409.654	293.43	183.939	280.989	384.968	413.263	403.874	436.513
ENSMUSG00000038206	Fbxo8	50753	F-box protein 8	chr8:56551133-56593939	+	-0.700948	0.174808	-4.00982	6.0766e-05	0.000697871	Yes	OK	209.455	273.194	161.651	314.588	218.83	286.164	160.403	143.464	191.27	151.468
ENSMUSG00000041130	Zfp598	213753	zinc finger protein 598	chr17:24669751-24682016	+	0.613292	0.152977	4.00905	6.0963e-05	0.000699533	Yes	OK	227.04	172.756	267.753	146.993	166.872	204.403	247.48	284.787	250.122	288.623
ENSMUSG00000054823	Whsc1l1	234135	Wolf-Hirschhorn syndrome candidate 1-like 1 (human)	chr8:25601600-25677972	+	0.57265	0.142901	4.00732	6.14123e-05	0.000704086	Yes	OK	600.676	465.906	701.754	435.969	398.218	563.531	705.775	665.931	667.238	768.071
ENSMUSG00000002981	Clptm1	56457	cleft lip and palate associated transmembrane protein 1	chr7:19631579-19665030	-	-0.485921	0.121331	-4.00493	6.20355e-05	0.000710622	Yes	OK	683.351	824.88	577.205	834.632	764.957	875.052	481.21	644.518	620.156	562.934
ENSMUSG00000079560	Hoxa3	15400	homeobox A3	chr6:52169061-52213067	-	1.4038	0.350675	4.00313	6.25093e-05	0.000715437	Yes	OK	22.2591	8.2705	32.7505	13.363	8.34361	3.10486	50.4125	23.5538	27.2192	29.8164
ENSMUSG00000033916	Chmp2a	68953	charged multivesicular body protein 2A	chr7:13032005-13034777	-	-0.648208	0.162027	-4.00062	6.31769e-05	0.000722461	Yes	OK	278.791	359.668	218.133	361.915	393.667	323.423	142.072	263.375	246.444	220.642
ENSMUSG00000038648	Creb3l2	208647	cAMP responsive element binding protein 3-like 2	chr6:37331020-37442148	-	0.835385	0.208993	3.99719	6.40986e-05	0.000732067	Yes	OK	405.909	273.242	505.409	332.405	177.871	309.451	430.798	415.404	601.765	573.668
ENSMUSG00000017007	Rbpjl	19668	recombination signal binding protein for immunoglobulin kappa J region-like	chr2:164403193-164415448	+	1.06045	0.265307	3.99705	6.41366e-05	0.000732067	Yes	OK	64.8791	37.0542	85.7478	54.5657	25.0308	31.566	100.825	64.2377	95.635	82.2934
ENSMUSG00000028952	Zbtb48	100090	zinc finger and BTB domain containing 48	chr4:152019775-152027671	-	1.00632	0.251776	3.99689	6.41809e-05	0.000732067	Yes	OK	46.9717	27.7389	61.3963	26.726	29.5819	26.9088	50.4125	83.509	44.8749	66.7888
ENSMUSG00000031342	Gpm6b	14758	glycoprotein m6b	chrX:166344552-166389033	+	-0.719217	0.180106	-3.9933	6.51602e-05	0.000742604	Yes	OK	5215.94	6809.87	4020.49	8768.37	6266.05	5395.21	4023.83	3717.22	4616.23	3724.67
ENSMUSG00000000881	Dlg3	53310	discs, large homolog 3 (Drosophila)	chrX:100774494-100818410	+	-0.652398	0.163395	-3.99277	6.53056e-05	0.000743629	Yes	OK	266.138	339.198	211.343	419.822	312.127	285.647	215.399	199.137	203.04	227.798
ENSMUSG00000041064	Pif1	208084	PIF1 5'-to-3' DNA helicase	chr9:65587204-65595962	+	1.1112	0.278421	3.99109	6.57691e-05	0.00074827	Yes	OK	117.443	64.3243	157.282	27.8396	75.0925	90.0408	132.906	186.289	169.2	140.734
ENSMUSG00000033545	Znrf1	170737	zinc and ring finger 1	chr8:111536639-111626030	+	0.510942	0.12806	3.98987	6.61091e-05	0.0007515	Yes	OK	244.437	196.658	280.271	186.526	190.765	212.683	247.48	310.482	278.077	285.045
ENSMUSG00000024038	Ndufv3	78330	NADH dehydrogenase (ubiquinone) flavoprotein 3	chr17:31520114-31531325	+	-0.558873	0.140191	-3.98651	6.70514e-05	0.000761566	Yes	OK	196.464	242.654	161.821	218.819	262.824	246.319	151.238	169.159	161.108	165.779
ENSMUSG00000038538	Ubn2	320538	ubinuclein 2	chr6:38433924-38512763	+	0.554819	0.139186	3.98616	6.71509e-05	0.000762048	Yes	OK	680.32	534.988	789.319	513.92	462.312	628.733	710.358	745.157	877.635	824.126
ENSMUSG00000068732	Tmem167b	67495	transmembrane protein 167B	chr3:108556424-108562466	-	-0.64617	0.16218	-3.98429	6.76821e-05	0.00076651	Yes	OK	264.916	337.655	210.363	410.356	304.542	298.066	219.982	177.724	230.26	213.486
ENSMUSG00000031028	Tub	22141	tubby candidate gene	chr7:109010879-109034459	+	-0.424746	0.106607	-3.98421	6.77061e-05	0.00076651	Yes	OK	2334.13	2735.96	2032.76	2922.05	2584.62	2701.22	2121.91	2184.08	1931.09	1893.94
ENSMUSG00000022686	B3gnt5	108105	UDP-GlcNAc:betaGal beta-1,3-N-acetylglucosaminyltransferase 5	chr16:19760233-19772753	+	-0.75339	0.189096	-3.98417	6.77158e-05	0.00076651	Yes	OK	226.56	300.129	171.384	236.08	393.667	270.64	160.403	177.724	187.592	159.816
ENSMUSG00000045409	Trim39	79263	tripartite motif-containing 39	chr17:36258872-36271433	-	0.662037	0.16621	3.98314	6.80094e-05	0.000769184	Yes	OK	137.162	102.465	163.185	104.677	105.433	97.2855	137.489	167.018	147.866	200.366
ENSMUSG00000003429	Rps11	27207	ribosomal protein S11	chr7:45122387-45124389	-	-0.649689	0.163177	-3.9815	6.84807e-05	0.000773451	Yes	OK	360.726	459.048	286.985	370.824	572.675	433.645	279.56	293.352	268.514	306.513
ENSMUSG00000021508	Cxcl14	57266	chemokine (C-X-C motif) ligand 14	chr13:56288642-56296551	-	-0.619957	0.155712	-3.98143	6.85022e-05	0.000773451	Yes	OK	173.586	218.314	140.041	190.423	234.759	229.759	137.489	154.17	145.659	122.844
ENSMUSG00000022336	Eif3e	16341	eukaryotic translation initiation factor 3, subunit E	chr15:43250039-43282736	-	-0.484476	0.121697	-3.981	6.86246e-05	0.00077418	Yes	OK	383.983	460.084	326.907	422.049	500.237	457.966	316.224	359.731	325.159	306.513
ENSMUSG00000028692	Akr1a1	58810	aldo-keto reductase family 1, member A1 (aldehyde reductase)	chr4:116636509-116651674	-	-0.414979	0.104265	-3.98006	6.88987e-05	0.000776618	Yes	OK	1329.16	1555.2	1159.64	1561.8	1614.49	1489.3	1182.4	1102.75	1270.47	1082.93
ENSMUSG00000070366	Plpp4	381925	phospholipid phosphatase 4	chr7:129257093-129391307	+	-0.896925	0.225522	-3.97711	6.97579e-05	0.000785641	Yes	OK	102.787	144.235	71.6999	194.321	112.639	125.747	68.7443	62.0964	77.2436	78.7154
ENSMUSG00000029053	Prkcz	18762	protein kinase C, zeta	chr4:155260117-155361428	-	-0.637958	0.160432	-3.9765	6.99378e-05	0.000787006	Yes	OK	174.035	224.888	135.895	237.194	235.138	202.333	91.6591	152.029	150.809	149.082
ENSMUSG00000009291	Pttg1ip	108705	pituitary tumor-transforming 1 interacting protein	chr10:77581766-77598732	+	-0.512833	0.128994	-3.97563	7.01941e-05	0.000789227	Yes	OK	392.591	477.844	328.651	538.418	431.971	463.141	302.475	349.025	349.435	313.669
ENSMUSG00000028998	Tomm7	66169	translocase of outer mitochondrial membrane 7 homolog (yeast)	chr5:23838943-23844145	-	-0.627692	0.157897	-3.97533	7.02821e-05	0.000789554	Yes	OK	143.116	183.636	112.727	188.196	179.008	183.704	77.9102	137.04	115.498	120.458
ENSMUSG00000031555	Adam9	11502	a disintegrin and metallopeptidase domain 9 (meltrin gamma)	chr8:24949610-25016922	-	-0.554005	0.139395	-3.97436	7.05702e-05	0.000792125	Yes	OK	1369.74	1688.69	1130.52	2019.49	1510.19	1536.39	1022	1077.05	1191.02	1232.02
ENSMUSG00000071847	Apcdd1	494504	adenomatosis polyposis coli down-regulated 1	chr18:62922326-62953195	+	-1.02105	0.256925	-3.97411	7.0644e-05	0.00079229	Yes	OK	234.75	345.148	151.952	535.634	235.897	263.913	109.991	164.877	199.362	133.578
ENSMUSG00000023147	Wrb	71446	tryptophan rich basic protein	chr16:96145418-96157852	+	-0.63204	0.159103	-3.97251	7.11178e-05	0.000796936	Yes	OK	189.608	243.63	149.091	243.318	222.623	264.948	105.408	177.724	167.729	145.504
ENSMUSG00000020038	Cry1	12952	cryptochrome 1 (photolyase-like)	chr10:85131699-85185054	-	-0.90749	0.228467	-3.97209	7.12463e-05	0.000797708	Yes	OK	105.102	145.345	74.9205	104.12	162.7	169.215	100.825	53.5314	80.9219	64.4035
ENSMUSG00000079470	Utp14b	195434	UTP14B small subunit processome component	chr1:78657824-78667601	+	0.653591	0.164562	3.9717	7.13615e-05	0.000798331	Yes	OK	412.136	305.244	492.305	236.08	345.88	333.772	522.457	438.958	437.714	570.09
ENSMUSG00000070469	Adamtsl3	269959	ADAMTS-like 3	chr7:82335693-82614448	+	-0.648788	0.163399	-3.97058	7.1697e-05	0.000801414	Yes	OK	538.308	688.167	425.913	791.202	524.51	748.788	375.802	436.816	485.531	405.504
ENSMUSG00000019920	Lims1	110829	LIM and senescent cell antigen-like domains 1	chr10:58323465-58424691	+	-0.548695	0.138198	-3.97036	7.17634e-05	0.000801488	Yes	OK	834.932	1029.21	689.223	1111.91	1047.88	927.835	646.197	590.987	823.196	696.512
ENSMUSG00000082315	Gm16523	100042584	mitochondrial ribosomal protein L40 pseudogene	chr2:39157485-39162235	-	1.13515	0.286026	3.9687	7.22648e-05	0.000806415	Yes	OK	24.1816	13.3638	32.295	13.363	13.2739	13.4544	22.9148	34.2601	33.8401	38.165
ENSMUSG00000059182	Skap2	54353	src family associated phosphoprotein 2	chr6:51859164-52012549	-	0.518033	0.130573	3.96737	7.26688e-05	0.000810248	Yes	OK	517.882	414.567	595.368	429.844	449.038	364.821	568.286	520.325	639.283	653.576
ENSMUSG00000047539	Fbxo28	67948	F-box protein 28	chr1:182313101-182341606	-	-0.559676	0.14124	-3.96259	7.41423e-05	0.00082599	Yes	OK	348.811	436.757	282.85	442.65	423.628	443.994	201.65	295.493	332.515	301.742
ENSMUSG00000034832	Tet3	194388	tet methylcytosine dioxygenase 3	chr6:83362373-83441678	-	0.934178	0.235772	3.96221	7.42583e-05	0.000826594	Yes	OK	1017.21	636.797	1302.53	417.594	493.031	999.764	1131.99	1526.72	1235.9	1315.5
ENSMUSG00000043059	Zfp513	101023	zinc finger protein 513	chr5:31198980-31202303	-	0.878807	0.221939	3.95968	7.50507e-05	0.000834084	Yes	OK	95.8605	61.8396	121.376	46.2138	56.509	82.7962	119.157	147.747	108.877	109.724
ENSMUSG00000064115	Cadm2	239857	cell adhesion molecule 2	chr16:66655420-67620908	-	-0.666498	0.168322	-3.95966	7.50557e-05	0.000834084	Yes	OK	847.573	1087.18	667.872	1430.4	946.241	884.884	632.448	678.778	705.492	654.769
ENSMUSG00000038776	Ephx1	13849	epoxide hydrolase 1, microsomal	chr1:180989555-181017569	-	-1.04672	0.264394	-3.95894	7.5284e-05	0.000835927	Yes	OK	73.8787	110.34	46.5331	103.007	152.46	75.5515	27.4977	62.0964	50.0244	46.5136
ENSMUSG00000079641	Rpl39	67248	ribosomal protein L39	chrX:37082517-37085222	-	-0.529377	0.133737	-3.95834	7.54717e-05	0.000837317	Yes	OK	289.432	349.8	244.156	317.372	391.012	341.017	270.394	246.245	230.995	228.99
ENSMUSG00000021892	Sh3bp5	24056	SH3-domain binding protein 5 (BTK-associated)	chr14:31373963-31436033	-	-0.748963	0.189363	-3.95517	7.64803e-05	0.000847414	Yes	OK	226.993	296.771	174.659	361.358	300.749	228.207	206.233	188.431	169.2	134.77
ENSMUSG00000023075	Akirin1	68050	akirin 1	chr4:123735194-123750299	-	-0.636198	0.160858	-3.95503	7.65251e-05	0.000847414	Yes	OK	149.243	186.564	121.252	195.991	197.592	166.11	146.655	113.487	119.912	104.954
ENSMUSG00000024613	Tcof1	21453	treacle ribosome biogenesis factor 1	chr18:60813755-60848964	-	0.63332	0.160136	3.95488	7.65716e-05	0.000847414	Yes	OK	254.116	190.316	301.967	157.015	196.075	217.857	288.726	359.731	299.411	259.999
ENSMUSG00000016382	Pls3	102866	plastin 3 (T-isoform)	chrX:75785653-75875170	-	-0.777121	0.196666	-3.95148	7.76682e-05	0.000858839	Yes	OK	337.993	454.307	250.758	581.848	412.629	368.443	206.233	237.679	332.515	226.605
ENSMUSG00000022425	Enpp2	18606	ectonucleotide pyrophosphatase/phosphodiesterase 2	chr15:54838900-54920146	-	-0.914038	0.231333	-3.95118	7.77681e-05	0.000859234	Yes	OK	1677.19	2353.5	1169.96	2568.48	3156.92	1335.09	1127.41	948.577	1418.34	1185.5
ENSMUSG00000002578	Ikzf4	22781	IKAROS family zinc finger 4	chr10:128632414-128645993	-	0.962619	0.243674	3.95044	7.80064e-05	0.000861157	Yes	OK	52.9469	31.5666	68.9821	37.8619	25.7893	31.0486	96.242	55.6727	69.1514	54.8622
ENSMUSG00000029765	Plxna4	243743	plexin A4	chr6:32144556-32588192	-	-0.687699	0.174095	-3.95012	7.81107e-05	0.000861598	Yes	OK	196.291	255.498	151.885	301.782	254.101	210.613	128.323	149.888	145.659	183.669
ENSMUSG00000032382	Snx1	56440	sorting nexin 1	chr9:66088126-66124886	-	-0.793223	0.200919	-3.94797	7.88175e-05	0.000868659	Yes	OK	813.457	1092.8	603.949	1522.83	824.121	931.457	595.784	490.348	685.629	644.035
ENSMUSG00000085028	Slc2a4rg-ps	329584	Slc2a4 regulator, pseudogene	chr2:181384249-181387596	+	1.08106	0.273839	3.94778	7.88805e-05	0.000868659	Yes	OK	31.0749	17.4846	41.2675	18.9309	15.9287	17.5942	36.6636	42.8251	33.1044	52.4769
ENSMUSG00000002365	Snx9	66616	sorting nexin 9	chr17:5841379-5930711	+	-0.503502	0.127559	-3.94722	7.90644e-05	0.000869968	Yes	OK	271.272	328.624	228.258	344.655	296.577	344.639	215.399	241.962	230.26	225.412
ENSMUSG00000022885	St6gal1	20440	beta galactoside alpha 2,6 sialyltransferase 1	chr16:23290469-23360350	+	-0.972056	0.246291	-3.94677	7.92125e-05	0.000870882	Yes	OK	248.176	358.054	165.768	507.238	209.349	357.576	142.072	141.323	216.282	163.394
ENSMUSG00000032898	Fbxo21	231670	F-box protein 21	chr5:117976769-118010191	+	-0.467306	0.118483	-3.94407	8.01095e-05	0.000880022	Yes	OK	484.849	579.02	414.22	522.271	581.398	633.391	384.968	445.381	403.138	423.393
ENSMUSG00000039756	Dnttip2	99480	deoxynucleotidyltransferase, terminal, interacting protein 2	chr3:122274413-122285271	+	-0.59666	0.151292	-3.94377	8.0212e-05	0.000880426	Yes	OK	194.465	242.118	158.725	224.944	272.684	228.724	169.569	156.312	170.672	138.348
ENSMUSG00000024811	Tnks2	74493	tankyrase, TRF1-interacting ankyrin-related ADP-ribose polymerase 2	chr19:36834231-36893477	+	-0.456625	0.115795	-3.94337	8.0343e-05	0.000881141	Yes	OK	1430.75	1704.87	1225.17	1758.91	1584.91	1770.8	1081.58	1241.93	1384.5	1192.66
ENSMUSG00000026510	Trp53bp2	209456	transformation related protein 53 binding protein 2	chr1:182409166-182462436	+	0.620536	0.157403	3.94234	8.06891e-05	0.000884078	Yes	OK	140.045	107.843	164.197	111.359	105.054	107.118	146.655	143.464	185.385	181.284
ENSMUSG00000039194	Rlbp1	19771	retinaldehyde binding protein 1	chr7:79374870-79387027	-	1.39791	0.35462	3.94199	8.08079e-05	0.000884078	Yes	OK	356.759	137.13	521.481	251.67	68.6451	91.0758	508.708	473.218	536.291	567.705
ENSMUSG00000025742	Prps2	110639	phosphoribosyl pyrophosphate synthetase 2	chrX:167346319-167382749	-	-0.738713	0.187396	-3.94199	8.08089e-05	0.000884078	Yes	OK	270.158	354.466	206.926	262.249	356.12	445.029	201.65	246.245	194.948	184.862
ENSMUSG00000026276	Sept2	18000	septin 2	chr1:93478992-93509732	+	0.889539	0.225677	3.94164	8.09258e-05	0.000884634	Yes	OK	48.3516	30.7186	61.5763	27.2828	30.7196	34.1534	68.7443	62.0964	61.7949	53.6696
ENSMUSG00000035847	Ids	15931	iduronate 2-sulfatase	chrX:70343069-70365085	-	-0.516758	0.131122	-3.94105	8.11274e-05	0.000885392	Yes	OK	559.014	682.994	466.029	761.692	606.808	680.481	384.968	511.76	495.095	472.292
ENSMUSG00000026718	Stam	20844	signal transducing adaptor molecule (SH3 domain and ITAM motif) 1	chr2:14074111-14148330	+	-0.50128	0.127234	-3.93983	8.1541e-05	0.000889182	Yes	OK	398.062	484.37	333.332	480.512	487.722	484.875	302.475	323.33	395.046	312.476
ENSMUSG00000023191	P3h3	14789	prolyl 3-hydroxylase 3	chr6:124841094-124857687	-	0.725128	0.184063	3.93955	8.16331e-05	0.000889462	Yes	OK	128.993	91.8832	156.826	89.6436	73.1962	112.81	169.569	141.323	153.016	163.394
ENSMUSG00000019868	Vta1	66201	vesicle (multivesicular body) trafficking 1	chr10:14655332-14705489	-	-0.661146	0.167891	-3.93794	8.21835e-05	0.000893411	Yes	OK	135.404	173.22	107.042	158.129	190.765	170.767	119.157	83.509	116.969	108.532
ENSMUSG00000037016	Frem2	242022	Fras1 related extracellular matrix protein 2	chr3:53513937-53657355	-	0.986674	0.25056	3.93787	8.22074e-05	0.000893411	Yes	OK	65.8813	40.8985	84.6185	41.2026	44.7521	36.7408	68.7443	62.0964	126.532	81.1007
ENSMUSG00000035247	Hectd1	207304	HECT domain containing 1	chr12:51743721-51829536	-	-0.407644	0.10352	-3.93781	8.22283e-05	0.000893411	Yes	OK	1274.34	1492.27	1110.89	1542.32	1445.72	1488.78	980.752	1166.98	1196.17	1099.63
ENSMUSG00000023243	Kcnk5	16529	potassium channel, subfamily K, member 5	chr14:20140057-20181782	-	1.34198	0.340801	3.93771	8.22624e-05	0.000893411	Yes	OK	18.5824	7.40714	26.9639	8.90868	6.06808	7.24466	45.8295	14.9888	27.9548	19.0825
ENSMUSG00000026674	Ddr2	18214	discoidin domain receptor family, member 2	chr1:169972306-170088944	-	0.823564	0.209249	3.9358	8.29184e-05	0.000899124	Yes	OK	426.737	287.991	530.796	386.971	243.102	233.899	513.291	387.567	528.199	694.127
ENSMUSG00000049090	Zadh2	225791	zinc binding alcohol dehydrogenase, domain containing 2	chr18:84088157-84097514	+	0.772362	0.196241	3.93579	8.29227e-05	0.000899124	Yes	OK	161.853	111.761	199.422	85.7461	100.503	149.033	206.233	220.549	192.006	178.899
ENSMUSG00000036959	Bcorl1	320376	BCL6 co-repressor-like 1	chrX:48341357-48406728	+	0.649346	0.165007	3.93525	8.31102e-05	0.000900292	Yes	OK	119.709	90.495	141.62	95.2115	80.0228	96.2505	128.323	132.758	151.545	153.853
ENSMUSG00000038260	Trpm4	68667	transient receptor potential cation channel, subfamily M, member 4	chr7:45303154-45333780	-	0.966365	0.245576	3.93509	8.31649e-05	0.000900292	Yes	OK	69.7947	40.6392	91.6613	38.4187	36.4085	47.0903	146.655	74.944	79.4506	65.5962
ENSMUSG00000085399	Foxd2os	100040736	forkhead box D2, opposite strand	chr4:114909288-114921118	+	1.41114	0.358638	3.93472	8.32923e-05	0.000900943	Yes	OK	15.4277	5.84161	22.6173	8.35189	6.06808	3.10486	27.4977	10.7063	27.2192	25.0458
ENSMUSG00000024589	Nedd4l	83814	neural precursor cell expressed, developmentally down-regulated gene 4-like	chr18:65023526-65217826	+	1.00971	0.256656	3.93408	8.3516e-05	0.000902467	Yes	OK	111.052	65.1996	145.441	50.1113	102.02	43.468	155.82	143.464	159.637	122.844
ENSMUSG00000037761	Actr5	109275	ARP5 actin-related protein 5	chr2:158624912-158639211	+	0.922433	0.234483	3.93389	8.35804e-05	0.000902467	Yes	OK	53.3308	34.1381	67.7253	28.9532	34.1329	39.3282	45.8295	92.074	66.2088	66.7888
ENSMUSG00000024948	Map4k2	26412	mitogen-activated protein kinase kinase kinase kinase 2	chr19:6341159-6355619	+	0.788422	0.200426	3.93373	8.36366e-05	0.000902467	Yes	OK	157.786	109.98	193.64	108.575	132.36	89.0059	123.74	246.245	193.477	211.1
ENSMUSG00000031833	Mast3	546071	microtubule associated serine/threonine kinase 3	chr8:70778116-70792433	-	0.676173	0.171899	3.93354	8.37028e-05	0.000902467	Yes	OK	223.749	162.574	269.631	151.448	142.221	194.054	284.143	316.906	216.282	261.192
ENSMUSG00000029298	Gbp9	236573	guanylate-binding protein 9	chr5:105078393-105110292	-	1.31932	0.335444	3.93306	8.38699e-05	0.000902825	Yes	OK	63.3391	26.6589	90.8492	38.4187	20.859	20.699	164.986	32.1189	62.5306	103.761
ENSMUSG00000040936	Ulk4	209012	unc-51-like kinase 4	chr9:120964453-121277172	-	0.939759	0.238938	3.93306	8.38709e-05	0.000902825	Yes	OK	55.9314	34.9306	71.6819	40.0891	26.9271	37.7758	68.7443	72.8027	58.1166	87.064
ENSMUSG00000024949	Sf1	22668	splicing factor 1	chr19:6363689-6378038	+	0.757503	0.192651	3.932	8.42412e-05	0.000906083	Yes	OK	689.86	482.465	845.406	321.826	479.757	645.81	847.847	899.328	770.965	863.484
ENSMUSG00000022556	Hsf1	15499	heat shock factor 1	chr15:76477361-76501155	+	0.708666	0.180351	3.92938	8.51669e-05	0.000915305	Yes	OK	175.201	124.554	213.185	131.96	103.537	138.166	233.731	246.245	164.051	208.715
ENSMUSG00000002808	Epdr1	105298	ependymin related protein 1 (zebrafish)	chr13:19591707-19619830	-	-0.674484	0.171665	-3.92908	8.52725e-05	0.000915705	Yes	OK	358.316	462.105	280.475	589.643	403.906	392.764	238.314	323.33	269.249	291.008
ENSMUSG00000027965	Olfm3	229759	olfactomedin 3	chr3:115080964-115125764	+	-1.55937	0.396921	-3.92866	8.54216e-05	0.000916571	Yes	OK	19.2643	37.8439	5.32956	25.0557	78.1265	10.3495	4.58295	8.56503	2.20696	5.96329
ENSMUSG00000051378	Kif18b	70218	kinesin family member 18B	chr11:102905518-102925124	-	0.755656	0.192357	3.9284	8.55118e-05	0.000916804	Yes	OK	232.495	162.583	284.929	109.688	186.593	191.466	302.475	244.103	285.434	307.706
ENSMUSG00000094936	Rbm4	19653	RNA binding motif protein 4	chr19:4784292-4794009	-	0.754279	0.192044	3.92762	8.5789e-05	0.00091904	Yes	OK	80.8024	57.5649	98.2305	51.2249	55.7505	65.7195	77.9102	113.487	103.727	97.7979
ENSMUSG00000039087	Rreb1	68750	ras responsive element binding protein 1	chr13:37826911-37952002	+	0.842679	0.2147	3.92491	8.67609e-05	0.000928709	Yes	OK	84.5393	55.8165	106.081	70.1559	43.9936	53.3	128.323	85.6503	112.555	97.7979
ENSMUSG00000017057	Il13ra1	16164	interleukin 13 receptor, alpha 1	chrX:36112107-36171261	+	-0.83287	0.21222	-3.92457	8.68864e-05	0.00092931	Yes	OK	61.3894	84.4881	44.0654	93.5411	76.6095	83.3136	41.2466	40.6839	47.8175	46.5136
ENSMUSG00000104713	Gbp6	100702	guanylate binding protein 6	chr5:105270701-105293699	-	1.55646	0.396625	3.92426	8.69984e-05	0.000929765	Yes	OK	104.002	21.8197	165.639	26.726	14.4117	24.3214	311.641	36.4014	127.268	187.247
ENSMUSG00000104148	Pcdha2	353234	protocadherin alpha 2	chr18:36939204-37187660	+	1.40471	0.358076	3.92294	8.74748e-05	0.000934111	Yes	OK	33.701	12.3946	49.6808	5.01113	23.8931	8.27962	59.5784	51.3902	60.3236	27.4311
ENSMUSG00000070565	Rasal2	226525	RAS protein activator like 2	chr1:157135182-157412595	-	-0.602071	0.153572	-3.92044	8.83868e-05	0.000943098	Yes	OK	706.221	886.851	570.749	711.024	878.354	1071.18	517.874	558.868	638.547	567.705
ENSMUSG00000029432	Gbas	14467	glioblastoma amplified sequence	chr5:129725074-129758325	+	-0.677377	0.172841	-3.91908	8.88879e-05	0.000947689	Yes	OK	274.841	356.093	213.901	281.18	431.592	355.506	178.735	224.832	245.708	206.33
ENSMUSG00000044716	Dok7	231134	docking protein 7	chr5:35057083-35087831	+	0.955263	0.243875	3.91702	8.96495e-05	0.000955049	Yes	OK	78.8974	48.9682	101.344	67.3719	34.5122	45.0204	87.0761	115.628	84.6002	118.073
ENSMUSG00000068740	Celsr2	53883	cadherin, EGF LAG seven-pass G-type receptor 2	chr3:108390847-108415494	-	0.625061	0.159667	3.91478	9.04875e-05	0.00096321	Yes	OK	607.592	459.181	718.901	390.312	420.594	566.636	614.116	845.796	673.859	741.833
ENSMUSG00000078307	AI593442	330941	expressed sequence AI593442	chr9:52673031-52679780	-	-1.251	0.319664	-3.91348	9.09736e-05	0.000967615	Yes	OK	53.2491	86.2015	28.5347	77.3942	73.5755	107.635	9.16591	55.6727	14.7131	34.5871
ENSMUSG00000084957	Bbip1	100503572	BBSome interacting protein 1	chr19:53929658-53944627	-	-0.656608	0.167883	-3.91111	9.18715e-05	0.00097639	Yes	OK	142.273	180.922	113.287	197.105	194.558	151.103	123.74	104.922	114.762	109.724
ENSMUSG00000026841	Fibcd1	98970	fibrinogen C domain containing 1	chr2:31813289-31846005	-	1.1933	0.305128	3.91082	9.19825e-05	0.000976794	Yes	OK	31.3971	15.2561	43.5028	11.6926	14.4117	19.6641	45.8295	59.9552	26.4835	41.743
ENSMUSG00000032740	Ccdc88a	108686	coiled coil domain containing 88A	chr11:29374171-29510808	+	-0.500562	0.128019	-3.91005	9.22767e-05	0.000979142	Yes	OK	1694.45	2045.26	1431.33	2417.04	1893.62	1825.14	1429.88	1421.79	1498.53	1375.13
ENSMUSG00000030786	Itgam	16409	integrin alpha M	chr7:128062639-128118491	+	-1.18101	0.302126	-3.909	9.26787e-05	0.000982629	Yes	OK	147.409	230.741	84.9107	388.641	124.016	179.564	54.9955	130.617	76.508	77.5227
ENSMUSG00000032507	Fbxl2	72179	F-box and leucine-rich repeat protein 2	chr9:113976957-114026751	-	1.01075	0.258653	3.90773	9.31655e-05	0.000987009	Yes	OK	41.251	24.2361	54.0123	27.8396	23.1345	21.734	68.7443	32.1189	60.3236	54.8622
ENSMUSG00000053898	Ech1	51798	enoyl coenzyme A hydratase 1, peroxisomal	chr7:28825337-28832239	+	-0.80241	0.205395	-3.90668	9.35745e-05	0.000990558	Yes	OK	103.383	140.04	75.8909	169.265	143.738	107.118	64.1614	85.6503	75.0367	78.7154
ENSMUSG00000032470	Mras	17532	muscle and microspikes RAS	chr9:99385419-99436712	-	-0.894703	0.229069	-3.90583	9.39043e-05	0.000993264	Yes	OK	563.876	789.934	394.333	580.735	780.507	1008.56	215.399	513.902	456.841	391.192
ENSMUSG00000018377	Vezf1	22344	vascular endothelial zinc finger 1	chr11:88068278-88084729	+	-0.493494	0.126382	-3.90478	9.431e-05	0.000996768	Yes	OK	784.852	945.608	664.285	963.808	930.692	942.324	701.192	563.151	770.229	622.567
ENSMUSG00000010358	Ifi35	70110	interferon-induced protein 35	chr11:101448411-101458701	+	1.04392	0.267374	3.90435	9.44786e-05	0.000997762	Yes	OK	71.5895	41.112	94.4477	46.2138	26.9271	50.1952	114.574	55.6727	88.2784	119.266
ENSMUSG00000021697	Depdc1b	218581	DEP domain containing 1B	chr13:108316336-108389557	+	0.931087	0.238488	3.90412	9.45688e-05	0.000997928	Yes	OK	100.664	62.54	129.257	38.4187	64.8526	84.3486	151.238	104.922	136.832	124.036
ENSMUSG00000021893	Capn7	12339	calpain 7	chr14:31336723-31371983	+	-0.650589	0.166692	-3.90295	9.5026e-05	0.00100189	Yes	OK	357.865	457.603	283.061	551.225	450.555	371.03	284.143	229.114	314.86	304.128
ENSMUSG00000018974	Sart3	53890	squamous cell carcinoma antigen recognized by T cells 3	chr5:113742445-113771649	-	0.705776	0.180843	3.90269	9.51296e-05	0.00100189	Yes	OK	333.807	239.504	404.534	195.434	208.969	314.108	435.381	426.11	333.251	423.393
ENSMUSG00000032046	Abhd12	76192	abhydrolase domain containing 12	chr2:150832514-150904731	-	-0.644715	0.165202	-3.90259	9.51689e-05	0.00100189	Yes	OK	761.526	972.615	603.21	1207.13	900.351	810.367	476.627	653.083	676.066	607.063
ENSMUSG00000014769	Psmb1	19170	proteasome (prosome, macropain) subunit, beta type 1	chr17:15475720-15498276	-	-0.571957	0.146594	-3.90163	9.55482e-05	0.00100509	Yes	OK	548.441	684.459	446.428	598.552	761.923	692.9	362.053	443.24	535.556	444.861
ENSMUSG00000051427	Ccdc157	216516	coiled-coil domain containing 157	chr11:4141123-4160293	-	0.684943	0.175586	3.90091	9.58323e-05	0.00100729	Yes	OK	114.07	83.6661	136.874	95.2115	70.9207	84.8661	137.489	124.193	133.153	152.66
ENSMUSG00000003031	Cdkn1b	12576	cyclin-dependent kinase inhibitor 1B	chr6:134920400-134925525	+	-0.533168	0.136742	-3.89907	9.65634e-05	0.00101418	Yes	OK	484.51	592.695	403.371	528.953	667.489	581.643	412.466	336.177	425.943	438.898
ENSMUSG00000029528	Pxn	19303	paxillin	chr5:115506675-115555987	+	0.563315	0.144569	3.89652	9.75831e-05	0.00102409	Yes	OK	403.841	317.644	468.489	335.189	265.858	351.884	384.968	490.348	521.578	477.063
ENSMUSG00000094910	D430019H16Rik	268595	RIKEN cDNA D430019H16 gene	chr12:105453855-105493095	+	-0.6735	0.172918	-3.8949	9.82404e-05	0.00103018	Yes	OK	453.167	580.665	357.544	753.34	459.278	529.378	403.3	327.612	354.585	344.678
ENSMUSG00000021038	Vipas39	104799	VPS33B interacting protein, apical-basolateral polarity regulator, spe-39 homolog	chr12:87238874-87266286	-	-0.555953	0.143046	-3.88654	0.000101684	0.00106546	Yes	OK	289.705	359.53	237.335	407.572	361.051	309.968	206.233	237.679	244.237	261.192
ENSMUSG00000024646	Cyb5a	109672	cytochrome b5 type A (microsomal)	chr18:84851413-84879863	+	-0.914461	0.235346	-3.8856	0.000102077	0.00106874	Yes	OK	154.521	220.603	104.959	298.998	185.835	176.977	73.3273	89.9328	145.659	110.917
ENSMUSG00000001173	Ocrl	320634	oculocerebrorenal syndrome of Lowe	chrX:47912455-47965866	+	-0.496177	0.12772	-3.88487	0.000102386	0.00107113	Yes	OK	242.241	290.172	206.293	277.283	290.509	302.723	233.731	179.866	205.247	206.33
ENSMUSG00000031344	Gabrq	57249	gamma-aminobutyric acid (GABA) A receptor, subunit theta	chrX:72825177-72838544	+	1.24409	0.320371	3.88327	0.000103059	0.00107734	Yes	OK	24.4659	11.2203	34.4001	11.6926	12.1362	9.83204	41.2466	29.9776	19.8626	46.5136
ENSMUSG00000041498	Kif14	381293	kinesin family member 14	chr1:136467847-136530819	+	0.949389	0.244554	3.88213	0.000103544	0.00108156	Yes	OK	226.492	138.202	292.71	81.8485	137.67	195.088	407.883	229.114	271.456	262.385
ENSMUSG00000029998	Pcyox1	66881	prenylcysteine oxidase 1	chr6:86386005-86397150	-	-0.57057	0.147023	-3.88081	0.00010411	0.00108662	Yes	OK	558.744	697.171	454.924	805.679	674.694	611.139	362.053	460.37	523.785	473.485
ENSMUSG00000051599	Pcdhb2	93873	protocadherin beta 2	chr18:37294839-37297614	+	-1.05211	0.271205	-3.87939	0.00010472	0.00109214	Yes	OK	128.149	191.396	80.7142	302.895	121.741	149.551	64.1614	83.509	100.049	75.1374
ENSMUSG00000049013	Prss48	368202	protease, serine 48	chr3:85993809-86002491	-	1.29048	0.332709	3.87871	0.000105013	0.00109434	Yes	OK	36.2156	16.578	50.9438	11.1359	9.10212	29.4961	41.2466	49.2489	69.1514	44.1283
ENSMUSG00000078247	Airn	104103	antisense Igf2r RNA	chr17:12741310-12830123	+	1.15237	0.29721	3.87728	0.000105632	0.00109993	Yes	OK	26.6601	13.7541	36.3395	9.46547	17.825	13.9719	41.2466	29.9776	41.9323	32.2018
ENSMUSG00000009741	Ubp1	22221	upstream binding protein 1	chr9:113930933-113977201	+	0.464652	0.119854	3.87683	0.000105828	0.00110112	Yes	OK	395.752	322.218	450.902	294.543	325.401	346.709	490.376	404.698	436.243	472.292
ENSMUSG00000052428	Tmco1	68944	transmembrane and coiled-coil domains 1	chr1:167308669-167333978	+	-0.497848	0.128434	-3.8763	0.000106056	0.00110263	Yes	OK	208.182	251.132	175.97	258.909	253.342	241.144	169.569	186.289	175.086	172.935
ENSMUSG00000041592	Sdk2	237979	sidekick cell adhesion molecule 2	chr11:113780789-114065951	-	0.995633	0.257044	3.8734	0.000107327	0.00111498	Yes	OK	166.404	101.365	215.183	111.359	67.5074	125.229	105.408	211.984	252.329	291.008
ENSMUSG00000028799	Zfp362	230761	zinc finger protein 362	chr4:128773084-128806112	-	0.649911	0.167811	3.87287	0.000107561	0.00111655	Yes	OK	160.526	117.996	192.424	106.904	105.812	141.271	210.816	209.843	177.293	171.743
ENSMUSG00000027276	Jag1	16449	jagged 1	chr2:137081450-137116520	-	0.63836	0.16493	3.87049	0.000108617	0.00112664	Yes	OK	416.793	312.395	495.092	400.891	257.893	278.402	462.878	548.162	461.255	508.072
ENSMUSG00000020088	Sar1a	20224	secretion associated Ras related GTPase 1A	chr10:61680320-61693297	+	-0.411497	0.106332	-3.86994	0.000108862	0.00112763	Yes	OK	750.933	882.937	651.931	865.256	883.664	899.891	586.618	618.823	706.963	695.319
ENSMUSG00000058318	Phf21a	192285	PHD finger protein 21A	chr2:92184181-92364666	+	0.479369	0.123871	3.8699	0.000108881	0.00112763	Yes	OK	342.596	277.273	391.588	292.316	259.031	280.472	435.381	331.895	393.575	405.504
ENSMUSG00000005161	Prdx2	21672	peroxiredoxin 2	chr8:84969621-84974810	+	-0.388945	0.100536	-3.86873	0.000109402	0.00113175	Yes	OK	690.366	798.907	608.96	776.726	829.81	790.186	604.95	650.942	609.857	570.09
ENSMUSG00000031775	Pllp	67801	plasma membrane proteolipid	chr8:94674894-94696242	-	-0.806729	0.208531	-3.86863	0.000109448	0.00113175	Yes	OK	634.189	856.957	467.113	1171.49	770.646	628.733	394.134	588.846	500.244	385.228
ENSMUSG00000068522	Aard	239435	alanine and arginine rich domain containing protein	chr15:52040106-52045722	+	-0.967292	0.250049	-3.86841	0.000109548	0.00113192	Yes	OK	59.5552	82.8938	42.0512	79.0645	76.9887	92.6282	50.4125	57.8139	30.1618	29.8164
ENSMUSG00000031202	Rab39b	67790	RAB39B, member RAS oncogene family	chrX:75572044-75578231	-	-0.615789	0.159213	-3.8677	0.000109865	0.00113357	Yes	OK	166.605	211.115	133.222	190.98	241.585	200.781	109.991	152.029	136.096	134.77
ENSMUSG00000025607	Copg2	54160	coatomer protein complex, subunit gamma 2	chr6:30747553-30896794	-	-0.489382	0.126531	-3.86767	0.000109878	0.00113357	Yes	OK	299.291	361.765	252.436	342.427	381.151	361.716	233.731	261.233	281.02	233.761
ENSMUSG00000045658	Pid1	98496	phosphotyrosine interaction domain containing 1	chr1:84036292-84284645	-	-0.732615	0.189466	-3.86674	0.000110299	0.00113704	Yes	OK	492.181	645.068	377.516	880.846	487.722	566.636	417.049	366.155	386.954	339.907
ENSMUSG00000066798	Zbtb6	241322	zinc finger and BTB domain containing 6	chr2:37425499-37430919	-	-0.622262	0.16097	-3.86571	0.000110767	0.00114099	Yes	OK	175.938	221.261	141.945	260.579	195.696	207.508	155.82	130.617	144.188	137.156
ENSMUSG00000037253	Mex3c	240396	mex3 RNA binding family member C	chr18:73572704-73592578	+	-0.47368	0.122541	-3.86548	0.000110869	0.00114116	Yes	OK	360.54	428.464	309.596	420.378	402.389	462.624	329.973	327.612	305.296	275.504
ENSMUSG00000005947	Itgae	16407	integrin alpha E, epithelial-associated	chr11:73090594-73134834	+	1.31173	0.339554	3.8631	0.000111955	0.00115145	Yes	OK	26.7269	11.4789	38.1629	17.2606	6.82659	10.3495	41.2466	36.4014	21.334	53.6696
ENSMUSG00000001924	Uba1	22201	ubiquitin-like modifier activating enzyme 1	chrX:20658301-20683179	+	-0.465867	0.120629	-3.86198	0.000112471	0.00115587	Yes	OK	2201.3	2628.51	1880.89	2488.31	2712.05	2685.18	1590.29	2100.57	2003.18	1829.54
ENSMUSG00000039699	Batf2	74481	basic leucine zipper transcription factor, ATF-like 2	chr19:6164457-6172475	+	1.5201	0.39385	3.85959	0.000113578	0.00116635	Yes	OK	11.389	2.43564	18.1041	3.34076	1.89627	2.0699	41.2466	8.56503	15.4487	7.15595
ENSMUSG00000041225	Arhgap12	75415	Rho GTPase activating protein 12	chr18:6024449-6136098	-	-0.613459	0.158953	-3.85938	0.000113674	0.00116645	Yes	OK	383.826	481.024	310.927	551.781	479.378	411.911	366.636	233.397	319.274	324.403
ENSMUSG00000002997	Prkar2b	19088	protein kinase, cAMP dependent regulatory, type II beta	chr12:31958478-32061279	-	-0.598678	0.155141	-3.85893	0.000113885	0.00116772	Yes	OK	214.725	270.394	172.974	301.225	283.303	226.655	151.238	175.583	170.672	194.403
ENSMUSG00000034422	Parp14	547253	poly (ADP-ribose) polymerase family, member 14	chr16:35832877-35871382	-	1.02491	0.265691	3.85751	0.000114548	0.00117361	Yes	OK	269.432	156.035	354.479	213.252	94.4345	160.418	490.376	207.702	286.905	432.935
ENSMUSG00000025868	Higd2a	67044	HIG1 domain family, member 2A	chr13:54590230-54591147	+	-0.641451	0.166295	-3.8573	0.000114645	0.00117371	Yes	OK	131.459	169.771	102.725	173.719	182.422	153.173	77.9102	111.345	115.498	106.147
ENSMUSG00000102742	Pcdhga11	93723	protocadherin gamma subfamily A, 11	chr18:37755772-37841872	+	0.820129	0.212658	3.85657	0.000114991	0.00117635	Yes	OK	189.899	128.861	235.678	114.142	161.183	111.257	151.238	325.471	215.547	250.458
ENSMUSG00000029701	Rbm28	68272	RNA binding motif protein 28	chr6:29123572-29164724	-	0.443441	0.115118	3.85207	0.000117126	0.00119727	Yes	OK	327.451	268.874	371.384	267.817	272.305	266.5	375.802	400.415	338.401	370.917
ENSMUSG00000047766	Lrrc49	102747	leucine rich repeat containing 49	chr9:60587223-60687534	-	-0.549116	0.142601	-3.85073	0.000117768	0.00120292	Yes	OK	324.409	404.255	264.524	408.686	419.077	385.002	210.816	237.679	303.089	306.513
ENSMUSG00000070509	Rgma	244058	repulsive guidance molecule family member A	chr7:73375519-73419899	+	0.848892	0.220513	3.84961	0.000118304	0.00120747	Yes	OK	230.324	150.721	290.027	205.456	99.744	146.963	375.802	256.951	243.501	283.853
ENSMUSG00000024269	Tpgs2	66648	tubulin polyglutamylase complex subunit 2	chr18:25136038-25168877	-	-0.695024	0.180564	-3.84918	0.000118514	0.0012087	Yes	OK	131.915	173.281	100.891	175.39	196.454	147.998	77.9102	111.345	117.705	96.6053
ENSMUSG00000005338	Cadm3	94332	cell adhesion molecule 3	chr1:173334253-173367695	-	-0.982616	0.255426	-3.84697	0.000119585	0.0012187	Yes	OK	285.492	414.454	188.771	503.34	525.268	214.753	123.74	199.137	200.833	231.376
ENSMUSG00000056383	AI987944	233168	expressed sequence AI987944	chr7:41372929-41393260	-	-0.918545	0.238784	-3.84676	0.000119691	0.00121885	Yes	OK	64.8822	88.1208	47.4533	97.9955	88.7457	77.6214	77.9102	29.9776	38.9896	42.9357
ENSMUSG00000062908	Acadm	11364	acyl-Coenzyme A dehydrogenase, medium chain	chr3:153922352-153944643	-	-0.649185	0.168819	-3.84544	0.000120337	0.00122449	Yes	OK	135.676	173	107.683	165.924	198.35	154.725	96.242	122.052	101.52	110.917
ENSMUSG00000022969	Il10rb	16155	interleukin 10 receptor, beta	chr16:91406234-91425834	+	-0.757658	0.197047	-3.84507	0.000120519	0.00122541	Yes	OK	92.0275	122.986	68.809	139.198	116.431	113.327	73.3273	49.2489	78.7149	73.9448
ENSMUSG00000024969	Mark2	13728	MAP/microtubule affinity regulating kinase 2	chr19:7275395-7341860	-	0.583371	0.15183	3.84227	0.000121903	0.00123855	Yes	OK	350.836	268.337	412.71	246.102	231.345	327.562	472.044	402.556	395.782	380.458
ENSMUSG00000040479	Dgkz	104418	diacylglycerol kinase zeta	chr2:91932821-91963563	-	-0.541115	0.140878	-3.84103	0.000122518	0.00124385	Yes	OK	542.8	666.651	449.912	570.156	786.575	643.223	407.883	479.642	480.382	431.742
ENSMUSG00000017776	Crk	12928	v-crk avian sarcoma virus CT10 oncogene homolog	chr11:75679258-75708428	+	-0.387408	0.100873	-3.84057	0.00012275	0.00124526	Yes	OK	856.727	989.394	757.227	965.478	972.41	1030.29	815.766	734.451	779.793	698.897
ENSMUSG00000022577	Ly6h	23934	lymphocyte antigen 6 complex, locus H	chr15:75564744-75567182	-	1.04833	0.272996	3.84011	0.000122977	0.00124662	Yes	OK	148.371	83.6679	196.898	134.744	57.2675	58.9923	256.645	207.702	132.418	190.825
ENSMUSG00000058254	Tspan7	21912	tetraspanin 7	chrX:10485115-10596604	+	-0.57974	0.150983	-3.83977	0.000123151	0.00124744	Yes	OK	721.29	893.769	591.931	1042.32	908.316	730.676	604.95	670.213	510.544	582.017
ENSMUSG00000031934	Panx1	55991	pannexin 1	chr9:15005784-15045478	-	-0.557448	0.1452	-3.83917	0.000123449	0.00124951	Yes	OK	194.943	239.006	161.895	239.978	235.897	241.144	155.82	196.996	155.223	139.541
ENSMUSG00000018585	Atox1	11927	antioxidant 1 copper chaperone	chr11:55446642-55461138	-	-0.675519	0.17598	-3.83861	0.000123733	0.00125144	Yes	OK	109.317	138.26	87.6088	149.22	128.947	136.614	109.991	74.944	77.2436	88.2567
ENSMUSG00000045777	Ifitm10	320802	interferon induced transmembrane protein 10	chr7:142326109-142372259	-	-1.20753	0.314754	-3.83641	0.000124846	0.00126174	Yes	OK	53.6668	85.1342	30.0662	141.425	66.3696	47.6078	27.4977	34.2601	28.6905	29.8164
ENSMUSG00000024640	Psat1	107272	phosphoserine aminotransferase 1	chr19:15905122-15925059	-	-0.403144	0.105091	-3.83615	0.000124981	0.00126215	Yes	OK	1110.78	1293.24	973.94	1333.52	1359.63	1186.57	948.672	1055.64	940.901	950.548
ENSMUSG00000041308	Sntb2	20650	syntrophin, basic 2	chr8:106935749-107014192	+	0.667873	0.17411	3.83593	0.000125092	0.00126233	Yes	OK	119.562	89.0039	142.48	100.779	83.4361	82.7962	142.072	122.052	166.258	139.541
ENSMUSG00000030423	Pop4	66161	processing of precursor 4, ribonuclease P/MRP family, (S. cerevisiae)	chr7:38262819-38271348	-	-0.596578	0.155557	-3.83511	0.000125508	0.00126421	Yes	OK	159.884	199.305	130.318	177.06	215.417	205.438	132.906	137.04	136.832	114.495
ENSMUSG00000032231	Anxa2	12306	annexin A2	chr9:69453682-69491785	+	-0.682635	0.178	-3.83503	0.000125551	0.00126421	Yes	OK	285.461	373.998	219.058	346.882	340.95	434.162	146.655	216.267	279.548	233.761
ENSMUSG00000028277	Ube2j1	56228	ubiquitin-conjugating enzyme E2J 1	chr4:33031424-33052364	+	-0.555196	0.144771	-3.83501	0.000125562	0.00126421	Yes	OK	343.471	423.452	283.485	476.058	450.176	344.122	279.56	274.081	286.905	293.394
ENSMUSG00000023232	Serinc2	230779	serine incorporator 2	chr4:130253496-130275586	-	-1.23706	0.322586	-3.83482	0.000125656	0.00126421	Yes	OK	24.6194	38.5091	14.202	45.1002	31.0989	39.3282	18.3318	19.2713	13.2418	5.96329
ENSMUSG00000051413	Plagl2	54711	pleiomorphic adenoma gene-like 2	chr2:153227768-153241358	-	0.857637	0.223664	3.83448	0.00012583	0.00126501	Yes	OK	70.6385	46.9702	88.3898	48.441	34.5122	57.9573	87.0761	77.0852	96.3706	93.0273
ENSMUSG00000042763	Maneal	215090	mannosidase, endo-alpha-like	chr4:124855238-124862171	-	-0.716903	0.187092	-3.83183	0.000127196	0.00127778	Yes	OK	195.629	253.335	152.35	309.02	249.17	201.816	164.986	179.866	140.51	124.036
ENSMUSG00000045180	Shroom2	110380	shroom family member 2	chrX:152609508-152644149	-	-0.633564	0.165476	-3.82873	0.000128804	0.00129297	Yes	OK	308.213	394.623	243.405	409.799	413.388	360.681	197.067	248.386	317.067	211.1
ENSMUSG00000032011	Thy1	21838	thymus cell antigen 1, theta	chr9:44043383-44048579	+	-0.907989	0.237222	-3.82759	0.000129403	0.00129801	Yes	OK	77.8331	110.467	53.358	94.6547	144.117	92.6282	36.6636	59.9552	50.0244	66.7888
ENSMUSG00000049556	Lingo1	235402	leucine rich repeat and Ig domain containing 1	chr9:56618474-56685253	-	0.567477	0.148294	3.8267	0.000129875	0.00130176	Yes	OK	169.899	132.363	198.051	133.073	117.569	146.446	183.318	220.549	192.741	195.596
ENSMUSG00000070808	Gltscr1	243842	glioma tumor suppressor candidate region gene 1	chr7:15971261-15999495	-	0.929409	0.24295	3.82551	0.000130503	0.00130708	Yes	OK	127.638	79.9117	163.433	79.6213	46.2691	113.845	160.403	173.442	149.338	170.55
ENSMUSG00000031007	Atp6ap2	70495	ATPase, H+ transporting, lysosomal accessory protein 2	chrX:12587758-12617051	+	-0.501993	0.13135	-3.82179	0.000132489	0.00132598	Yes	OK	415.724	503.795	349.67	509.465	544.989	456.931	348.305	295.493	364.884	389.999
ENSMUSG00000063450	Syne2	319565	spectrin repeat containing, nuclear envelope 2	chr12:75818317-76110928	+	0.68897	0.180296	3.82132	0.000132737	0.00132747	Yes	OK	1307.57	952.815	1573.64	870.267	746.753	1241.43	1439.05	1351.13	1840.61	1663.76
ENSMUSG00000030249	Abcc9	20928	ATP-binding cassette, sub-family C (CFTR/MRP), member 9	chr6:142587861-142702274	-	-1.0785	0.282369	-3.81947	0.000133738	0.00133648	Yes	OK	134.038	203.244	82.1338	322.383	154.357	132.991	41.2466	109.204	83.8645	94.2199
ENSMUSG00000022848	Dirc2	224132	disrupted in renal carcinoma 2 (human)	chr16:35694902-35769356	-	-0.80121	0.209941	-3.81636	0.000135434	0.00135242	Yes	OK	241.213	325.125	178.279	457.127	266.237	252.011	164.986	205.561	158.901	183.669
ENSMUSG00000025912	Mybl1	17864	myeloblastosis oncogene-like 1	chr1:9667410-9700209	-	0.583507	0.152967	3.8146	0.000136402	0.00136105	Yes	OK	217.694	166.641	255.983	136.971	179.767	183.187	284.143	222.691	252.329	264.77
ENSMUSG00000031799	Tpm4	326618	tropomyosin 4	chr8:72135291-72153129	+	-0.502654	0.131777	-3.81442	0.000136502	0.00136105	Yes	OK	603.527	733.505	506.043	817.371	690.244	692.9	458.295	473.218	592.937	499.724
ENSMUSG00000004896	Rrnad1	229503	ribosomal RNA adenine dimethylase domain containing 1	chr3:87922600-87930195	-	0.67301	0.176524	3.81256	0.000137534	0.00137022	Yes	OK	103.386	75.2163	124.513	64.5879	77.7473	83.3136	142.072	107.063	127.268	121.651
ENSMUSG00000024220	Zfp523	224656	zinc finger protein 523	chr17:28177417-28205886	+	0.529629	0.138927	3.81228	0.000137689	0.00137022	Yes	OK	206.724	163.887	238.852	149.777	162.321	179.564	219.982	271.94	236.88	226.605
ENSMUSG00000025266	Gnl3l	237107	guanine nucleotide binding protein-like 3 (nucleolar)-like	chrX:150983132-151017293	-	-0.479316	0.125736	-3.81209	0.000137795	0.00137022	Yes	OK	666.557	803.206	564.069	763.363	874.183	772.074	458.295	603.834	562.039	632.109
ENSMUSG00000037742	Eef1a1	13627	eukaryotic translation elongation factor 1 alpha 1	chr9:78478453-78481724	-	-0.526101	0.138011	-3.81203	0.000137831	0.00137022	Yes	OK	5628.09	6857.41	4706.11	5805.68	6929.37	7837.17	4514.21	4978.42	4845.01	4486.78
ENSMUSG00000022623	Shank3	58234	SH3/ankyrin domain gene 3	chr15:89499856-89560260	+	0.631563	0.165722	3.81098	0.000138415	0.00137501	Yes	OK	196.293	145.678	234.255	130.846	150.943	155.243	238.314	284.787	186.12	227.798
ENSMUSG00000025786	Zdhhc3	69035	zinc finger, DHHC domain containing 3	chr9:123072309-123113205	-	-0.507363	0.13316	-3.81018	0.000138865	0.00137846	Yes	OK	453.405	551.998	379.459	526.169	568.882	560.944	311.641	447.523	416.38	342.293
ENSMUSG00000002847	Pla1a	85031	phospholipase A1 member A	chr16:38396116-38433145	-	-1.39856	0.367088	-3.80988	0.000139036	0.00137913	Yes	OK	20.3738	37.6884	7.38779	47.3274	26.9271	38.8107	0	4.28251	16.92	8.3486
ENSMUSG00000078676	Casc3	192160	cancer susceptibility candidate 3	chr11:98809807-98833807	+	0.456897	0.119939	3.8094	0.000139304	0.00138077	Yes	OK	310.375	253.027	353.385	245.546	240.827	272.71	394.134	325.471	351.642	342.293
ENSMUSG00000029621	Arpc1a	56443	actin related protein 2/3 complex, subunit 1A	chr5:145083868-145108756	+	-0.542172	0.142337	-3.80908	0.000139486	0.00138155	Yes	OK	712.863	879.276	588.052	858.574	807.434	971.82	467.461	631.671	693.721	559.356
ENSMUSG00000019843	Fyn	14360	Fyn proto-oncogene	chr10:39369798-39565374	+	-0.492513	0.129312	-3.80871	0.000139692	0.00138206	Yes	OK	1729.56	2082.9	1464.56	1785.08	2211.06	2252.57	1416.13	1492.46	1625.79	1323.85
ENSMUSG00000040462	Os9	216440	amplified in osteosarcoma	chr10:127094258-127121160	-	-0.613329	0.161037	-3.80862	0.000139744	0.00138206	Yes	OK	638.661	807.735	511.856	1002.78	717.171	703.25	421.632	501.054	579.695	545.045
ENSMUSG00000031149	Praf2	54637	PRA1 domain family 2	chrX:7728570-7731063	+	-0.759938	0.199606	-3.80718	0.000140558	0.00138909	Yes	OK	94.7842	125.66	71.6275	130.289	128.188	118.502	73.3273	79.2265	83.8645	50.0916
ENSMUSG00000015879	Fam184b	58227	family with sequence similarity 184, member B	chr5:45529704-45639501	-	0.635352	0.167089	3.80247	0.000143258	0.00141473	Yes	OK	274.705	206.592	325.791	221.047	237.793	160.935	284.143	374.72	350.907	293.394
ENSMUSG00000021701	Plk2	20620	polo-like kinase 2	chr13:110395043-110400843	+	-0.862493	0.22686	-3.80188	0.000143603	0.00141708	Yes	OK	968.047	1337.27	691.129	767.817	1598.94	1645.06	513.291	792.265	738.596	720.365
ENSMUSG00000024976	Shoc2	56392	soc-2 (suppressor of clear) homolog (C. elegans)	chr19:53944875-54033278	+	-0.517364	0.13611	-3.80108	0.000144064	0.00141989	Yes	OK	252.445	308.812	210.169	307.906	331.848	286.682	197.067	203.419	239.823	200.366
ENSMUSG00000060450	Rnf14	56736	ring finger protein 14	chr18:38296634-38317849	+	-0.445173	0.117119	-3.80103	0.000144099	0.00141989	Yes	OK	538.16	639.662	462.033	600.222	699.346	619.419	426.215	460.37	508.337	453.21
ENSMUSG00000042751	Nmnat2	226518	nicotinamide nucleotide adenylyltransferase 2	chr1:152955100-153119261	+	-0.589792	0.15524	-3.79924	0.00014514	0.00142822	Yes	OK	1123.42	1399.24	916.558	1668.71	1337.25	1191.75	962.42	995.684	971.063	737.062
ENSMUSG00000022364	Tbc1d31	210544	TBC1 domain family, member 31	chr15:57912198-57970068	+	0.604651	0.159159	3.79904	0.000145257	0.00142822	Yes	OK	118.847	89.2629	141.036	83.5189	92.1589	92.1107	151.238	147.747	128.004	137.156
ENSMUSG00000037805	Rpl10a	19896	ribosomal protein L10A	chr17:28328470-28331033	+	0.976461	0.257034	3.79895	0.000145309	0.00142822	Yes	OK	79.4192	48.0754	102.927	33.4076	40.9595	69.8593	82.4932	139.182	93.428	96.6053
ENSMUSG00000068966	Zbtb34	241311	zinc finger and BTB domain containing 34	chr2:33406107-33431324	-	0.775088	0.204032	3.79885	0.000145371	0.00142822	Yes	OK	112.602	78.8048	137.95	79.6213	61.06	95.7331	114.574	162.736	155.223	119.266
ENSMUSG00000034187	Nsf	18195	N-ethylmaleimide sensitive fusion protein	chr11:103821782-103954056	-	-0.604491	0.159137	-3.79857	0.000145536	0.00142879	Yes	OK	518.053	650.802	418.491	571.269	815.019	566.119	380.385	421.828	399.46	472.292
ENSMUSG00000021711	Trappc13	66975	trafficking protein particle complex 13	chr13:104142152-104178466	-	-0.426418	0.112296	-3.79726	0.000146306	0.0014345	Yes	OK	332.429	390.63	288.778	394.766	382.289	394.834	302.475	265.516	300.882	286.238
ENSMUSG00000066571	4931406P16Rik	233103	RIKEN cDNA 4931406P16 gene	chr7:34236713-34285609	-	-0.499293	0.131489	-3.79721	0.000146332	0.0014345	Yes	OK	707.908	856.877	596.181	876.948	832.085	861.598	572.869	573.857	717.998	519.999
ENSMUSG00000040037	Negr1	320840	neuronal growth regulator 1	chr3:156561793-157316464	+	-0.502562	0.132397	-3.79586	0.00014713	0.00144127	Yes	OK	660.882	800.277	556.336	806.792	910.97	683.068	527.04	524.608	564.246	609.448
ENSMUSG00000021109	Hif1a	15251	hypoxia inducible factor 1, alpha subunit	chr12:73907866-73947554	+	-0.399969	0.105425	-3.79386	0.000148323	0.0014519	Yes	OK	900.718	1052.29	787.036	1026.73	1126.77	1003.39	714.941	777.276	815.104	840.824
ENSMUSG00000038546	Ranbp9	56705	RAN binding protein 9	chr13:43402672-43480973	-	-0.499437	0.131668	-3.79316	0.000148742	0.00145493	Yes	OK	560.735	678.797	472.188	769.487	598.844	668.062	462.878	438.958	528.935	457.981
ENSMUSG00000027581	Stmn3	20262	stathmin-like 3	chr2:181306458-181314500	-	-0.593342	0.156513	-3.79101	0.000150035	0.00146651	Yes	OK	397.285	496.295	323.027	494.432	515.787	478.665	274.977	404.698	258.214	354.219
ENSMUSG00000045691	Thtpa	105663	thiamine triphosphatase	chr14:55094783-55098995	+	-0.660946	0.174431	-3.78915	0.000151166	0.00147649	Yes	OK	96.6436	122.242	77.4444	120.824	117.569	128.334	87.0761	79.2265	74.301	69.1741
ENSMUSG00000030207	Fam234b	74525	family with sequence similarity 234, member B	chr6:135197986-135236240	+	-0.385987	0.10188	-3.78865	0.000151467	0.00147834	Yes	OK	557.521	646.66	490.666	656.458	618.565	664.957	462.878	524.608	492.152	483.026
ENSMUSG00000040163	1700034J05Rik	73344	RIKEN cDNA 1700034J05 gene	chr6:146951300-146954421	-	1.08134	0.285448	3.78822	0.000151732	0.00147985	Yes	OK	66.1732	37.276	87.8461	47.3274	18.9627	45.5379	77.9102	81.3678	116.969	75.1374
ENSMUSG00000036698	Ago2	239528	argonaute RISC catalytic subunit 2	chr15:73101624-73184947	-	0.740103	0.195468	3.78631	0.000152901	0.00149018	Yes	OK	1027.6	725.747	1253.98	575.723	579.502	1022.02	1141.16	1443.21	1267.53	1164.03
ENSMUSG00000026921	Egfl7	353156	EGF-like domain 7	chr2:26583863-26592682	+	0.670611	0.177178	3.78496	0.000153734	0.0014972	Yes	OK	179.348	131.7	215.085	154.788	124.396	115.915	233.731	199.137	254.536	172.935
ENSMUSG00000057554	Lgals8	56048	lectin, galactose binding, soluble 8	chr13:12439414-12461738	-	-0.730129	0.192987	-3.78331	0.000154759	0.00150609	Yes	OK	161.908	214.891	122.171	269.488	204.418	170.767	100.825	126.334	143.452	118.073
ENSMUSG00000034636	Zyg11b	414872	zyg-ll family member B, cell cycle regulator	chr4:108227754-108301090	-	-0.462013	0.122148	-3.78241	0.000155316	0.00151042	Yes	OK	818.933	976.468	700.782	1099.11	893.145	937.149	692.026	638.095	702.549	770.457
ENSMUSG00000045932	Ifit2	15958	interferon-induced protein with tetratricopeptide repeats 2	chr19:34550693-34576534	+	-0.720485	0.190494	-3.78219	0.000155456	0.00151068	Yes	OK	394.247	512.254	305.742	643.652	489.997	403.114	403.3	231.256	304.561	283.853
ENSMUSG00000032745	Gpbp1	73274	GC-rich promoter binding protein 1	chr13:111425679-111490041	-	-0.43416	0.11481	-3.78155	0.000155856	0.00151347	Yes	OK	545.996	644.63	472.02	693.207	663.696	576.986	458.295	458.229	473.025	498.531
ENSMUSG00000036106	Prr5	109270	proline rich 5 (renal)	chr15:84680997-84703673	+	0.886394	0.234418	3.78126	0.000156036	0.00151411	Yes	OK	51.8684	33.6654	65.5207	28.3964	32.2367	40.3631	50.4125	85.6503	64.0019	62.0182
ENSMUSG00000019809	Pex3	56535	peroxisomal biogenesis factor 3	chr10:13523944-13553142	-	-0.755031	0.199706	-3.78071	0.000156382	0.00151637	Yes	OK	119.6	160.343	89.0435	158.686	190.386	131.956	68.7443	102.78	105.934	78.7154
ENSMUSG00000032249	Anp32a	11737	acidic (leucine-rich) nuclear phosphoprotein 32 family, member A	chr9:62341342-62378805	+	-0.464672	0.122936	-3.77979	0.000156962	0.0015209	Yes	OK	470.802	558.942	404.697	541.202	625.391	510.231	417.049	413.263	372.241	416.237
ENSMUSG00000027185	Nat10	98956	N-acetyltransferase 10	chr2:103721258-103761250	-	0.658539	0.174288	3.77846	0.000157804	0.00152779	Yes	OK	244.708	179.755	293.423	131.96	202.901	204.403	302.475	325.471	261.893	283.853
ENSMUSG00000097397	Gm16861	100503704	predicted gene, 16861	chr16:4935163-4939585	-	1.41085	0.373409	3.7783	0.000157902	0.00152779	Yes	OK	11.4075	3.79873	17.114	1.67038	4.55106	5.17476	18.3318	19.2713	11.7705	19.0825
ENSMUSG00000030772	Dkk3	50781	dickkopf WNT signaling pathway inhibitor 3	chr7:112116018-112159057	-	-0.522928	0.138433	-3.77747	0.000158427	0.00153176	Yes	OK	234.142	289.43	192.677	295.1	290.13	283.059	137.489	220.549	201.569	211.1
ENSMUSG00000021824	Ap3m1	55946	adaptor-related protein complex 3, mu 1 subunit	chr14:21033741-21052442	-	-0.481472	0.12751	-3.77595	0.0001594	0.00154006	Yes	OK	242.526	290.361	206.65	287.862	303.783	279.437	219.982	192.713	220.696	193.211
ENSMUSG00000017715	Pgs1	74451	phosphatidylglycerophosphate synthase 1	chr11:117986856-118024011	+	0.507447	0.134404	3.77553	0.000159669	0.00154155	Yes	OK	208.445	168.185	238.641	156.459	162.321	185.774	219.982	237.679	246.444	250.458
ENSMUSG00000020409	Slu7	193116	SLU7 splicing factor homolog (S. cerevisiae)	chr11:43433730-43447981	+	-0.646523	0.171292	-3.77439	0.0001604	0.00154669	Yes	OK	215.303	273.292	171.812	334.632	250.308	234.934	192.484	143.464	164.051	187.247
ENSMUSG00000028969	Cdk5	12568	cyclin-dependent kinase 5	chr5:24418241-24423530	-	-0.512705	0.13584	-3.77434	0.000160433	0.00154669	Yes	OK	183.247	222.842	153.551	213.252	231.725	223.55	142.072	160.594	149.338	162.201
ENSMUSG00000041236	Vps41	218035	VPS41 HOPS complex subunit	chr13:18717291-18866811	+	-0.491211	0.130264	-3.77088	0.00016267	0.00156713	Yes	OK	487.371	588.09	411.832	667.594	564.711	531.965	412.466	364.014	445.07	425.779
ENSMUSG00000028433	Ubap2	68926	ubiquitin-associated protein 2	chr4:41194314-41275135	-	0.623857	0.165519	3.76909	0.000163842	0.00157656	Yes	OK	307.821	231.408	365.13	190.98	205.177	298.066	389.551	349.025	364.149	357.797
ENSMUSG00000049336	Tenm2	23964	teneurin transmembrane protein 2	chr11:36006655-36944241	-	0.95889	0.254413	3.76903	0.000163884	0.00157656	Yes	OK	141.692	86.8119	182.852	43.9866	104.674	111.775	151.238	192.713	169.2	218.256
ENSMUSG00000052557	Gan	209239	giant axonal neuropathy	chr8:117158134-117205186	+	0.653472	0.173487	3.7667	0.000165418	0.00159018	Yes	OK	229.119	171.62	272.244	173.162	131.601	210.095	229.148	289.07	286.905	283.853
ENSMUSG00000003068	Stk11	20869	serine/threonine kinase 11	chr10:80115802-80130685	+	0.537217	0.142645	3.76611	0.000165807	0.00159204	Yes	OK	291.37	229.664	337.65	208.797	211.624	268.57	325.39	359.731	305.296	360.183
ENSMUSG00000047407	Tgif1	21815	TGFB-induced factor homeobox 1	chr17:70844204-70851210	-	0.874554	0.232231	3.76588	0.000165961	0.00159204	Yes	OK	41.7436	27.3503	52.5387	27.2828	25.7893	28.9787	50.4125	49.2489	54.4384	56.0549
ENSMUSG00000052105	Mtcl1	68617	microtubule crosslinking factor 1	chr17:66336981-66449750	-	0.490835	0.130338	3.76587	0.000165969	0.00159204	Yes	OK	364.801	293.557	418.233	273.385	325.78	281.507	398.717	475.359	376.655	422.201
ENSMUSG00000024231	Cul2	71745	cullin 2	chr18:3383224-3436700	+	-0.516586	0.137212	-3.76487	0.000166634	0.00159603	Yes	OK	261.55	318.479	218.853	300.111	357.258	298.066	215.399	199.137	219.96	240.917
ENSMUSG00000026987	Baz2b	407823	bromodomain adjacent to zinc finger domain, 2B	chr2:59899362-60125740	-	0.531781	0.141257	3.76464	0.000166792	0.00159603	Yes	OK	335.895	263.119	390.477	272.828	256.756	259.773	481.21	301.917	384.011	394.77
ENSMUSG00000040714	Klc3	232943	kinesin light chain 3	chr7:19394439-19399921	-	0.894743	0.237675	3.76457	0.000166835	0.00159603	Yes	OK	48.5185	30.5018	62.031	23.9421	31.8574	35.7058	64.1614	68.5202	52.2314	63.2109
ENSMUSG00000027849	Syt6	54524	synaptotagmin VI	chr3:103575281-103630969	+	-0.707803	0.188019	-3.76453	0.000166861	0.00159603	Yes	OK	190.044	245.371	148.549	210.468	243.102	282.542	146.655	196.996	116.969	133.578
ENSMUSG00000029030	Tprgl	67808	transformation related protein 63 regulated like	chr4:154157484-154160684	-	-0.6836	0.181689	-3.76248	0.000168235	0.00160802	Yes	OK	296.865	384.789	230.922	412.026	398.218	344.122	164.986	321.189	194.213	243.302
ENSMUSG00000054256	Msi1	17690	musashi RNA-binding protein 1	chr5:115429684-115454202	+	0.585027	0.155547	3.76109	0.000169171	0.00161544	Yes	OK	177.842	138.925	207.03	136.414	126.671	153.69	155.82	244.103	211.133	217.064
ENSMUSG00000032254	Kif23	71819	kinesin family member 23	chr9:61917277-61946799	-	0.979901	0.260544	3.76098	0.000169252	0.00161544	Yes	OK	229.548	136.425	299.39	77.3942	164.217	167.662	430.798	182.007	310.446	274.311
ENSMUSG00000022747	St3gal6	54613	ST3 beta-galactoside alpha-2,3-sialyltransferase 6	chr16:58470540-58523312	-	-0.744713	0.198027	-3.76067	0.000169456	0.00161623	Yes	OK	126.901	169.973	94.5966	131.96	179.767	198.193	68.7443	98.4978	97.8419	113.302
ENSMUSG00000085795	Zfp703	353310	zinc finger protein 703	chr8:26977335-26981462	+	1.12479	0.299186	3.75949	0.000170262	0.00162276	Yes	OK	129.519	68.9109	174.975	48.441	35.65	122.642	142.072	224.832	183.913	149.082
ENSMUSG00000008734	Gprc5b	64297	G protein-coupled receptor, family C, group 5, member B	chr7:118972039-118995211	-	-0.461595	0.122802	-3.75887	0.000170682	0.00162561	Yes	OK	640.446	765.676	546.524	706.013	719.067	871.947	490.376	554.585	568.66	572.476
ENSMUSG00000018572	Phf23	78246	PHD finger protein 23	chr11:69996940-70000011	+	-0.506452	0.134747	-3.75853	0.000170913	0.00162665	Yes	OK	182.958	220.389	154.884	226.615	210.486	224.067	164.986	149.888	150.809	153.853
ENSMUSG00000053931	Cnn3	71994	calponin 3, acidic	chr3:121426540-121458205	+	-0.388942	0.103553	-3.75596	0.000172678	0.00164228	Yes	OK	752.57	874.831	660.874	847.438	907.178	869.877	609.533	668.072	640.754	725.136
ENSMUSG00000084941	Gm11944	100302648	predicted gene 11944	chr11:3308999-3320722	+	1.23635	0.329223	3.75534	0.000173108	0.0016452	Yes	OK	19.987	8.93971	28.2725	10.0223	6.44733	10.3495	36.6636	34.2601	24.2766	17.8899
ENSMUSG00000036990	Otud4	73945	OTU domain containing 4	chr8:79639675-79677755	+	0.413927	0.110236	3.75492	0.000173394	0.00164675	Yes	OK	523.286	438.144	587.143	399.22	452.072	463.141	563.703	633.812	573.81	577.246
ENSMUSG00000022965	Ifngr2	15980	interferon gamma receptor 2	chr16:91547093-91564007	+	-0.512239	0.136431	-3.75457	0.000173641	0.00164792	Yes	OK	182.577	223.345	152.001	216.036	230.966	223.032	132.906	160.594	161.844	152.66
ENSMUSG00000078921	Tgtp2	100039796	T cell specific GTPase 2	chr11:49057195-49064212	-	1.47194	0.392075	3.75425	0.000173864	0.00164888	Yes	OK	88.0719	23.1471	136.766	36.1915	10.9984	22.2515	247.48	47.1076	117.705	134.77
ENSMUSG00000045991	Onecut2	225631	one cut domain, family member 2	chr18:64340363-64398488	+	0.975157	0.259875	3.7524	0.000175148	0.00165988	Yes	OK	42.3628	24.6357	55.6581	23.3853	30.3404	20.1816	77.9102	38.5426	53.7027	52.4769
ENSMUSG00000030830	Itgal	16408	integrin alpha L	chr7:127296259-127335137	+	1.09803	0.292685	3.75158	0.000175726	0.00166418	Yes	OK	58.8352	31.2131	79.5517	42.873	25.4101	25.3563	123.74	36.4014	75.7723	82.2934
ENSMUSG00000044533	Rps2	16898	ribosomal protein S2	chr17:24720062-24721927	+	1.40613	0.375003	3.74966	0.000177075	0.00167576	Yes	OK	194.232	66.4205	290.091	30.6236	41.3388	127.299	362.053	327.612	221.432	249.265
ENSMUSG00000022553	Maf1	68877	MAF1 homolog, negative regulator of RNA polymerase III	chr15:76351293-76354378	+	-0.505654	0.134915	-3.74795	0.000178288	0.00168606	Yes	OK	217.111	264.332	181.696	269.488	240.448	283.059	164.986	188.431	186.12	187.247
ENSMUSG00000025137	Pcyt2	68671	phosphate cytidylyltransferase 2, ethanolamine	chr11:120610086-120617890	-	0.795795	0.21246	3.74562	0.000179951	0.00170047	Yes	OK	199.422	136.743	246.431	87.4164	153.598	169.215	192.484	291.211	242.03	259.999
ENSMUSG00000028328	Tmod1	21916	tropomodulin 1	chr4:46039221-46116032	+	-1.05141	0.280715	-3.74546	0.000180066	0.00170047	Yes	OK	36.7143	55.5584	22.5813	42.3162	70.5414	53.8175	18.3318	19.2713	26.4835	26.2385
ENSMUSG00000006527	Sfmbt1	54650	Scm-like with four mbt domains 1	chr14:30714848-30822721	+	0.549931	0.146865	3.74447	0.000180778	0.00170599	Yes	OK	192.289	149.823	224.139	136.414	144.875	168.18	229.148	246.245	224.374	196.788
ENSMUSG00000022024	Sugt1	67955	SGT1, suppressor of G2 allele of SKP1 (S. cerevisiae)	chr14:79587690-79629755	+	-0.454307	0.121341	-3.74404	0.000181087	0.0017077	Yes	OK	298.499	357.189	254.482	350.223	372.049	349.296	238.314	237.679	279.548	262.385
ENSMUSG00000041762	Gpr155	68526	G protein-coupled receptor 155	chr2:73341505-73386480	-	-0.701755	0.187464	-3.74342	0.000181532	0.00171069	Yes	OK	316.059	412.419	243.789	531.737	357.258	348.261	201.65	299.776	262.628	211.1
ENSMUSG00000054072	Iigp1	60440	interferon inducible GTPase 1	chr18:60376028-60392629	+	1.49162	0.3985	3.74308	0.00018178	0.0017109	Yes	OK	231.154	48.4198	368.205	60.6904	34.8915	49.6777	765.353	79.2265	269.249	358.99
ENSMUSG00000028757	Ddost	13200	dolichyl-di-phosphooligosaccharide-protein glycotransferase	chr4:138304737-138312611	+	-0.524057	0.140009	-3.74304	0.00018181	0.0017109	Yes	OK	736.089	903.085	610.842	857.461	936.38	915.415	439.964	678.778	649.582	675.044
ENSMUSG00000031902	Nfatc3	18021	nuclear factor of activated T cells, cytoplasmic, calcineurin dependent 3	chr8:106059602-106130537	+	0.574561	0.153531	3.74232	0.000182331	0.0017146	Yes	OK	211.646	166.569	245.454	158.129	158.908	182.669	206.233	229.114	297.204	249.265
ENSMUSG00000043668	Tox3	244579	TOX high mobility group box family member 3	chr8:90247111-90348252	-	-0.836859	0.223702	-3.74095	0.000183323	0.00172272	Yes	OK	83.605	113.662	61.062	143.652	108.846	88.4884	73.3273	47.1076	61.7949	62.0182
ENSMUSG00000027242	Wdr76	241627	WD repeat domain 76	chr2:121506722-121544859	+	0.825782	0.220754	3.74073	0.000183485	0.00172303	Yes	OK	138.112	90.3264	173.952	66.2583	102.778	101.943	210.816	214.126	136.096	134.77
ENSMUSG00000027162	Lin7c	22343	lin-7 homolog C (C. elegans)	chr2:109890877-109900936	+	-0.47599	0.127331	-3.7382	0.000185343	0.00173926	Yes	OK	614.23	733.671	524.649	646.993	851.807	702.215	545.372	509.619	525.992	517.613
ENSMUSG00000073434	Wdr90	106618	WD repeat domain 90	chr17:25844733-25861515	-	1.02543	0.274605	3.73421	0.000188308	0.00176585	Yes	OK	219.552	125.891	289.797	58.4632	119.465	199.746	357.47	301.917	230.26	269.541
ENSMUSG00000102976	Zc3h11a	70579	zinc finger CCCH type containing 11A	chr1:133619870-133661399	-	0.808357	0.216512	3.73354	0.000188804	0.00176926	Yes	OK	111.044	74.5677	138.4	65.7015	59.1638	98.8379	151.238	152.029	144.188	106.147
ENSMUSG00000031913	Vps4a	116733	vacuolar protein sorting 4A	chr8:107031325-107045756	+	-0.530841	0.142217	-3.73262	0.000189495	0.0017745	Yes	OK	315.366	383.903	263.964	420.935	411.492	319.283	274.977	269.798	267.778	243.302
ENSMUSG00000038467	Chmp4b	75608	charged multivesicular body protein 4B	chr2:154657025-154694783	+	-0.528629	0.14164	-3.73221	0.00018981	0.00177621	Yes	OK	374.533	460.308	310.202	454.343	480.516	446.064	229.148	387.567	300.882	323.21
ENSMUSG00000062127	Cttnbp2nl	80281	CTTNBP2 N-terminal like	chr3:105001914-105053146	-	-0.657851	0.176287	-3.73171	0.000190187	0.00177848	Yes	OK	920.155	1178.41	726.46	867.483	1151.04	1516.72	646.197	792.265	767.287	700.09
ENSMUSG00000098488	Pla2g4b	211429	phospholipase A2, group IVB (cytosolic)	chr2:120033432-120043032	+	1.38123	0.37047	3.72833	0.000192753	0.00180053	Yes	OK	10.0746	3.76275	14.8085	5.01113	2.65478	3.62233	13.7489	14.9888	16.1844	14.3119
ENSMUSG00000041995	Zbed3	72114	zinc finger, BED type containing 3	chr13:95324824-95337842	+	0.828159	0.222131	3.72825	0.000192813	0.00180053	Yes	OK	98.1773	65.5321	122.661	54.5657	56.1297	85.901	105.408	160.594	102.992	121.651
ENSMUSG00000031841	Cdh13	12554	cadherin 13	chr8:118283610-119324927	+	-0.483516	0.129728	-3.72715	0.000193656	0.00180652	Yes	OK	559.13	670.806	475.373	783.964	633.356	595.097	485.793	464.653	490.681	460.366
ENSMUSG00000031157	Pqbp1	54633	polyglutamine binding protein 1	chrX:7894518-7899269	-	-0.628726	0.168698	-3.72692	0.000193833	0.00180652	Yes	OK	220.03	276.642	177.571	315.701	299.991	214.235	192.484	182.007	164.051	171.743
ENSMUSG00000028821	Syf2	68592	SYF2 homolog, RNA splicing factor (S. cerevisiae)	chr4:134930979-134937537	+	-0.58268	0.156345	-3.72689	0.000193859	0.00180652	Yes	OK	166.611	207.866	135.669	222.16	204.798	196.641	132.906	122.052	124.325	163.394
ENSMUSG00000020538	Srebf1	20787	sterol regulatory element binding transcription factor 1	chr11:60199083-60220627	-	0.796107	0.213674	3.72581	0.000194692	0.00181294	Yes	OK	659.105	450.609	815.477	322.383	441.073	588.37	563.703	1062.06	868.071	768.071
ENSMUSG00000032280	Tle3	21887	transducin-like enhancer of split 3	chr9:61372365-61418497	+	0.543018	0.145751	3.72564	0.000194819	0.00181294	Yes	OK	586.146	462.335	679.005	531.737	370.911	484.358	618.699	734.451	722.412	640.457
ENSMUSG00000038145	Snrk	20623	SNF related kinase	chr9:122117265-122169702	+	-0.675128	0.181237	-3.7251	0.000195235	0.00181555	Yes	OK	188.733	243.853	147.393	226.615	304.162	200.781	132.906	145.605	140.51	170.55
ENSMUSG00000020463	Smek2	104570	SMEK homolog 2, suppressor of mek1 (Dictyostelium)	chr11:29172906-29220797	+	-0.454537	0.12206	-3.72388	0.000196182	0.00182309	Yes	OK	501.114	596.63	429.477	669.821	560.16	559.909	417.049	426.11	465.669	409.082
ENSMUSG00000040818	Dennd6a	211922	DENN/MADD domain containing 6A	chr14:26573857-26634322	+	-0.541474	0.145443	-3.72293	0.000196928	0.00182875	Yes	OK	294.553	361.881	244.057	419.822	339.812	326.01	252.063	207.702	255.272	261.192
ENSMUSG00000049764	Zfp280b	64453	zinc finger protein 280B	chr10:76032611-76042969	+	0.73296	0.196912	3.72227	0.00019744	0.00183224	Yes	OK	78.6654	54.8307	96.5414	55.6793	49.3031	59.5097	114.574	83.509	83.1289	104.954
ENSMUSG00000007670	Khsrp	16549	KH-type splicing regulatory protein	chr17:57021048-57031507	-	0.648707	0.174297	3.72185	0.000197772	0.00183404	Yes	OK	777.848	577.804	927.88	440.423	534.37	758.62	893.676	1049.22	871.75	896.878
ENSMUSG00000027206	Cops2	12848	COP9 signalosome subunit 2	chr2:125830301-125859082	-	-0.536973	0.144303	-3.72116	0.000198311	0.00183778	Yes	OK	605.951	737.874	507.008	622.494	874.941	716.187	582.035	471.076	500.244	474.678
ENSMUSG00000012114	Med15	94112	mediator complex subunit 15	chr16:17651207-17722947	-	0.67009	0.180122	3.72019	0.000199069	0.00184353	Yes	OK	241.535	177.803	289.335	138.085	161.942	233.382	265.811	312.623	279.548	299.357
ENSMUSG00000107283	Mpv17	17527	MpV17 mitochondrial inner membrane protein	chr5:31140662-31154180	-	-0.731151	0.196572	-3.7195	0.000199615	0.0018473	Yes	OK	147.337	195.881	110.93	246.659	167.631	173.354	87.0761	111.345	108.141	137.156
ENSMUSG00000019461	Plscr3	70310	phospholipid scramblase 3	chr11:69846616-69852058	+	0.725963	0.195249	3.71815	0.00020069	0.00185597	Yes	OK	90.6905	66.0276	109.188	62.9176	56.509	78.6564	87.0761	109.204	123.59	116.88
ENSMUSG00000054999	Naaladl1	381204	N-acetylated alpha-linked acidic dipeptidase-like 1	chr19:6105797-6115555	+	1.26283	0.339779	3.71662	0.000201907	0.00186593	Yes	OK	15.7848	6.90318	22.4459	5.56793	5.30957	9.83204	27.4977	21.4126	20.5983	20.2752
ENSMUSG00000037705	Tecta	21683	tectorin alpha	chr9:42329618-42399929	-	1.10501	0.297451	3.71495	0.000203246	0.00187701	Yes	OK	101.095	56.0263	134.897	43.4298	47.0276	77.6214	50.4125	117.769	210.397	161.009
ENSMUSG00000042742	Bmt2	101148	base methyltransferase of 25S rRNA 2	chr6:13625674-13677966	-	-0.485898	0.130829	-3.71399	0.000204016	0.00188283	Yes	OK	245.096	294.889	207.751	325.724	285.2	273.745	206.233	205.561	214.075	205.137
ENSMUSG00000019817	Plagl1	22634	pleiomorphic adenoma gene-like 1	chr10:13090787-13131695	+	1.03155	0.277808	3.71318	0.00020467	0.00188756	Yes	OK	41.7676	23.1957	55.6964	18.3742	28.4441	22.7689	82.4932	29.9776	56.6453	53.6696
ENSMUSG00000042121	Ssh1	231637	slingshot homolog 1 (Drosophila)	chr5:113942218-113993757	-	0.683403	0.184114	3.71184	0.000205755	0.00189626	Yes	OK	197.505	145.916	236.198	146.993	113.776	176.977	174.152	276.222	242.766	251.651
ENSMUSG00000048915	Efna5	13640	ephrin A5	chr17:62602956-62881317	-	1.35017	0.363862	3.71067	0.00020671	0.00190375	Yes	OK	22.9627	8.87736	33.5267	5.01113	15.9287	5.69224	22.9148	34.2601	22.0696	54.8622
ENSMUSG00000025809	Itgb1	16412	integrin beta 1 (fibronectin receptor beta)	chr8:128685653-128733579	+	-0.594566	0.160252	-3.71018	0.00020711	0.00190613	Yes	OK	2529.9	3168.64	2050.84	3139.75	3250.97	3115.21	1471.13	2156.25	2457.82	2118.16
ENSMUSG00000033065	Pfkm	18642	phosphofructokinase, muscle	chr15:98112059-98132447	+	-0.558421	0.150608	-3.70778	0.000209083	0.00192296	Yes	OK	675.536	835.323	555.696	954.342	876.837	674.789	485.793	586.704	519.371	630.916
ENSMUSG00000036503	Rnf13	24017	ring finger protein 13	chr3:57736061-57835425	+	-0.678422	0.183062	-3.70597	0.000210581	0.00193541	Yes	OK	378.097	486.208	297.014	625.835	463.829	368.96	339.139	252.668	320.745	275.504
ENSMUSG00000043323	Fbrsl1	381668	fibrosin-like 1	chr5:110361751-110387127	-	0.745754	0.201257	3.70548	0.000210991	0.00193785	Yes	OK	138.266	97.9557	168.498	82.4053	80.0228	131.439	146.655	175.583	163.315	188.44
ENSMUSG00000038515	Grtp1	66790	GH regulated TBC protein 1	chr8:13176868-13200624	-	0.926199	0.249966	3.7053	0.000211138	0.00193786	Yes	OK	52.4944	32.1712	67.7369	36.1915	26.1686	34.1534	73.3273	74.944	46.3462	76.3301
ENSMUSG00000042104	Uggt2	66435	UDP-glucose glycoprotein glucosyltransferase 2	chr14:118984984-119099434	-	0.527241	0.142303	3.70506	0.000211339	0.00193839	Yes	OK	339.025	271.065	389.995	268.374	252.963	291.856	371.219	321.189	456.105	411.467
ENSMUSG00000032328	Tmem30a	69981	transmembrane protein 30A	chr9:79768940-79793430	-	-0.460334	0.124259	-3.70464	0.000211688	0.00194026	Yes	OK	1211.29	1443.46	1037.16	1584.63	1462.41	1283.34	976.169	1077.05	1152.03	943.392
ENSMUSG00000026511	Srp9	27058	signal recognition particle 9	chr1:182124736-182132415	+	0.650591	0.175723	3.70238	0.00021359	0.00195635	Yes	OK	99.3436	75.3672	117.326	69.0423	77.368	79.6913	96.242	113.487	133.153	126.422
ENSMUSG00000025173	Wdr45b	66840	WD repeat domain 45B	chr11:121327202-121354447	-	-0.479621	0.129565	-3.70176	0.000214106	0.00195973	Yes	OK	276.064	333.956	232.646	321.826	329.193	350.849	206.233	237.679	264.835	221.834
ENSMUSG00000039485	Tspyl4	72480	TSPY-like 4	chr10:34297420-34301320	+	-0.652353	0.176248	-3.70134	0.000214462	0.00196166	Yes	OK	682.749	872.188	540.67	1123.05	850.29	643.223	508.708	565.292	499.509	589.173
ENSMUSG00000039887	Alg14	66789	asparagine-linked glycosylation 14	chr3:121291816-121362011	+	-0.714784	0.19313	-3.70105	0.00021471	0.00196258	Yes	OK	74.1632	98.0643	56.2373	93.5411	99.744	100.908	50.4125	55.6727	64.0019	54.8622
ENSMUSG00000056121	Fez2	225020	fasciculation and elongation protein zeta 2 (zygin II)	chr17:78377877-78418152	-	-0.598579	0.161752	-3.7006	0.000215089	0.00196369	Yes	OK	141.906	179.348	113.825	203.786	167.631	166.627	96.242	124.193	119.176	115.688
ENSMUSG00000043881	Kbtbd7	211255	kelch repeat and BTB (POZ) domain containing 7	chr14:79426510-79431038	+	-0.688075	0.185938	-3.70056	0.000215124	0.00196369	Yes	OK	195.789	255.557	150.963	325.167	239.689	201.816	123.74	158.453	161.844	159.816
ENSMUSG00000021270	Hsp90aa1	15519	heat shock protein 90, alpha (cytosolic), class A member 1	chr12:110691035-110696395	-	-0.576847	0.155921	-3.6996	0.000215941	0.00196845	Yes	OK	383.732	471.573	317.851	448.218	527.164	439.337	384.968	295.493	248.651	342.293
ENSMUSG00000013033	Adgrl1	330814	adhesion G protein-coupled receptor L1	chr8:83900097-83941954	+	0.485991	0.131431	3.69768	0.000217576	0.00198202	Yes	OK	1750.2	1416.92	2000.17	1571.83	1198.45	1480.5	1819.43	2214.06	1903.87	2063.3
ENSMUSG00000000804	Usp32	237898	ubiquitin specific peptidase 32	chr11:84984487-85139955	-	-0.446315	0.120713	-3.69732	0.000217884	0.00198347	Yes	OK	653.642	776.721	561.332	818.485	703.897	807.78	545.372	513.902	632.662	553.393
ENSMUSG00000021559	Dapk1	69635	death associated protein kinase 1	chr13:60602210-60763191	+	0.831719	0.224978	3.69688	0.000218263	0.00198557	Yes	OK	92.8207	60.4395	117.107	63.4744	61.4393	56.4049	164.986	68.5202	103.727	131.192
ENSMUSG00000056201	Cfl1	12631	cofilin 1, non-muscle	chr19:5490454-5494031	+	-0.485916	0.131455	-3.69645	0.000218632	0.00198758	Yes	OK	1828.08	2195.16	1552.77	2253.34	2462.5	1869.64	1544.46	1635.92	1650.81	1379.9
ENSMUSG00000020585	Laptm4a	17775	lysosomal-associated protein transmembrane 4A	chr12:8921306-8938741	+	-0.604325	0.163516	-3.69581	0.000219183	0.00199123	Yes	OK	687.623	865.293	554.369	1081.29	795.298	719.292	513.291	481.783	601.029	621.375
ENSMUSG00000053552	Ebf4	228598	early B cell factor 4	chr2:130295938-130370481	+	0.999847	0.270592	3.69503	0.000219858	0.00199601	Yes	OK	71.388	41.1055	94.0999	60.6904	38.3047	24.3214	123.74	94.2153	80.9219	77.5227
ENSMUSG00000058152	Chsy3	78923	chondroitin sulfate synthase 3	chr18:59175339-59411336	+	0.99248	0.268649	3.69433	0.000220466	0.00200018	Yes	OK	33.2068	19.4633	43.5144	23.3853	18.9627	16.0418	45.8295	42.8251	35.3114	50.0916
ENSMUSG00000036036	Zfp57	22715	zinc finger protein 57	chr17:37002524-37010729	+	0.925979	0.250743	3.69295	0.000221669	0.00200973	Yes	OK	66.6207	43.3626	84.0642	45.657	35.2707	49.1602	41.2466	83.509	93.428	118.073
ENSMUSG00000058672	Tubb2a	22151	tubulin, beta 2A class IIA	chr13:34074279-34078008	-	-0.554268	0.150095	-3.69277	0.000221826	0.00200979	Yes	OK	729.582	899.555	602.102	697.104	1038.02	963.54	568.286	618.823	639.283	582.017
ENSMUSG00000045934	Mtmr11	194126	myotubularin related protein 11	chr3:96161969-96171718	+	-0.749214	0.202959	-3.69146	0.000222973	0.00201746	Yes	OK	84.0292	112.005	63.0476	114.142	94.0552	127.817	50.4125	74.944	58.8523	67.9815
ENSMUSG00000050668	Gpatch11	53951	G patch domain containing 11	chr17:78835515-78848308	+	-0.736734	0.199613	-3.6908	0.000223546	0.00202128	Yes	OK	86.4317	114.953	65.0408	121.381	119.465	104.013	68.7443	47.1076	78.7149	65.5962
ENSMUSG00000026447	Pik3c2b	240752	phosphoinositide-3-kinase, class 2, beta polypeptide	chr1:133046011-133108688	+	0.587242	0.159136	3.69018	0.000224092	0.00202484	Yes	OK	137.025	105.1	160.968	108.575	94.4345	112.292	151.238	188.431	151.545	152.66
ENSMUSG00000031982	Arv1	68865	ARV1 homolog, fatty acid homeostasis modulator	chr8:124722138-124734123	+	1.10933	0.300769	3.68832	0.000225737	0.00203833	Yes	OK	35.1037	19.3182	46.9429	12.8062	16.6872	28.4612	36.6636	36.4014	51.4958	63.2109
ENSMUSG00000024747	Aldh1a7	26358	aldehyde dehydrogenase family 1, subfamily A7	chr19:20692952-20727556	-	1.28183	0.347553	3.68815	0.000225895	0.00203838	Yes	OK	13.6933	5.97478	19.4822	6.68151	6.06808	5.17476	22.9148	12.8475	24.2766	17.8899
ENSMUSG00000101481	1700123O21Rik	68238	RIKEN cDNA 1700123O21 gene	chr16:5975586-5998496	+	1.41666	0.384313	3.6862	0.000227624	0.0020526	Yes	OK	15.5454	4.80878	23.5979	1.11359	6.06808	7.24466	18.3318	36.4014	11.0348	28.6238
ENSMUSG00000026409	Pfkfb2	18640	6-phosphofructo-2-kinase/fructose-2,6-biphosphatase 2	chr1:130692254-130715821	-	0.490692	0.13315	3.68527	0.000228464	0.00205879	Yes	OK	184.652	148.153	212.026	139.755	147.909	156.795	219.982	216.267	206.719	205.137
ENSMUSG00000046865	Fbl	14113	fibrillarin	chr7:28169747-28179269	+	1.02214	0.277481	3.68363	0.000229938	0.00207068	Yes	OK	29.8139	16.5727	39.7448	13.9198	18.2042	17.5942	45.8295	47.1076	33.8401	32.2018
ENSMUSG00000074093	Svip	75744	small VCP/p97-interacting protein	chr7:51997160-52006018	-	-0.600831	0.163153	-3.68263	0.000230844	0.00207744	Yes	OK	236.495	298.654	189.876	331.848	296.577	267.535	151.238	231.256	214.811	162.201
ENSMUSG00000035575	Utp6	216987	UTP6 small subunit processome component	chr11:79933955-79962387	-	-0.482719	0.131113	-3.68169	0.000231692	0.00208256	Yes	OK	405.398	484.89	345.779	473.274	543.093	438.302	362.053	355.449	362.677	302.935
ENSMUSG00000041444	Arhgap32	330914	Rho GTPase activating protein 32	chr9:32224248-32265511	+	0.408093	0.110845	3.68166	0.000231724	0.00208256	Yes	OK	646.127	540.449	725.386	559.02	489.997	572.329	765.353	740.875	670.18	725.136
ENSMUSG00000006673	Qrich1	69232	glutamine-rich 1	chr9:108517086-108560167	+	-0.367624	0.0998804	-3.68065	0.000232644	0.00208813	Yes	OK	620.145	715.508	548.622	719.933	724.377	702.215	527.04	524.608	552.476	590.365
ENSMUSG00000038704	Aspdh	68352	aspartate dehydrogenase domain containing	chr7:44465434-44467751	+	1.16268	0.315893	3.68063	0.000232656	0.00208813	Yes	OK	19.2676	9.3731	26.6884	8.90868	8.34361	10.867	32.0807	27.8363	20.5983	26.2385
ENSMUSG00000033453	Adamts15	235130	a disintegrin-like and metallopeptidase (reprolysin type) with thrombospondin type 1 motif, 15	chr9:30899154-30922452	-	-1.15994	0.315189	-3.68014	0.000233107	0.00208983	Yes	OK	39.4064	62.8688	21.8097	33.9643	81.1606	73.4816	9.16591	27.8363	22.8053	27.4311
ENSMUSG00000051510	Mafg	17134	v-maf musculoaponeurotic fibrosarcoma oncogene family, protein G (avian)	chr11:120628350-120633547	-	0.751053	0.204086	3.68008	0.000233157	0.00208983	Yes	OK	460.541	322.356	564.179	268.374	234	464.693	563.703	573.857	506.13	613.026
ENSMUSG00000024937	Ehbp1l1	114601	EH domain binding protein 1-like 1	chr19:5707373-5726317	-	0.753361	0.204747	3.67946	0.000233725	0.00209352	Yes	OK	102.463	72.8465	124.675	90.7572	56.8882	70.8942	109.991	111.345	129.475	147.89
ENSMUSG00000028221	Tmem55a	72519	transmembrane protein 55A	chr4:14864218-14915260	+	-0.495287	0.134712	-3.67665	0.000236318	0.00211533	Yes	OK	273.633	333.844	228.475	307.906	345.88	347.744	197.067	214.126	258.214	244.495
ENSMUSG00000036256	Igfbp7	29817	insulin-like growth factor binding protein 7	chr5:77349239-77408045	-	-0.709771	0.193079	-3.67607	0.000236852	0.00211869	Yes	OK	307.607	404.319	235.073	528.953	336.778	347.226	187.901	250.527	288.376	213.486
ENSMUSG00000032410	Xrn1	24127	5'-3' exoribonuclease 1	chr9:95954759-96057806	+	0.550103	0.149656	3.67578	0.000237128	0.00211975	Yes	OK	471.6	368.695	548.779	390.868	296.577	418.638	609.533	468.935	571.603	545.045
ENSMUSG00000018848	Rars	104458	arginyl-tRNA synthetase	chr11:35808380-35834528	-	-0.502723	0.136782	-3.67537	0.000237507	0.00212172	Yes	OK	442.21	531.364	375.344	450.445	592.017	551.629	426.215	351.166	378.126	345.871
ENSMUSG00000001833	Sept7	235072	septin 7	chr9:25252438-25308571	+	-0.614499	0.167213	-3.67495	0.0002379	0.002123	Yes	OK	2751.45	3466.05	2215.49	4265.03	3275.62	2857.5	2199.82	1813.64	2524.03	2324.49
ENSMUSG00000063142	Kcnma1	16531	potassium large conductance calcium-activated channel, subfamily M, alpha member 1	chr14:23298693-24004205	-	-0.616898	0.167869	-3.67487	0.000237968	0.002123	Yes	OK	466.23	584.954	377.187	722.16	589.741	442.959	421.632	383.285	347.229	356.605
ENSMUSG00000005609	Ctr9	22083	CTR9 homolog, Paf1/RNA polymerase II complex component	chr7:111028950-111056377	+	-0.532521	0.144916	-3.67468	0.000238149	0.00212321	Yes	OK	420.835	516.613	349.001	597.438	510.477	441.925	334.556	304.058	378.126	379.265
ENSMUSG00000021792	Fam213a	70564	family with sequence similarity 213, member A	chr14:40993734-41008266	-	-0.719324	0.195769	-3.67436	0.00023845	0.00212447	Yes	OK	195.617	257.156	149.463	274.499	313.265	183.704	123.74	171.301	144.188	158.623
ENSMUSG00000039396	Neil3	234258	nei like 3 (E. coli)	chr8:53586866-53639065	-	1.11033	0.302237	3.67371	0.000239057	0.00212847	Yes	OK	115.272	60.3312	156.477	22.8285	74.334	83.8311	224.565	122.052	130.211	149.082
ENSMUSG00000021969	Zdhhc20	75965	zinc finger, DHHC domain containing 20	chr14:57832701-57890262	-	-0.512663	0.139566	-3.67326	0.000239474	0.00213076	Yes	OK	483.641	592.204	402.218	559.02	621.978	595.615	325.39	406.839	491.417	385.228
ENSMUSG00000041957	Pkp2	67451	plakophilin 2	chr16:16213344-16272712	+	1.3102	0.35683	3.67178	0.000240867	0.00214174	Yes	OK	14.1213	6.31171	19.9784	7.7951	4.93031	6.20971	4.58295	27.8363	27.2192	20.2752
ENSMUSG00000079487	Med12	59024	mediator complex subunit 12	chrX:101274090-101298934	+	0.510043	0.13892	3.67148	0.000241146	0.00214279	Yes	OK	515.434	413.453	591.92	389.198	375.083	476.078	586.618	498.913	648.846	633.301
ENSMUSG00000032932	Hspa13	110920	heat shock protein 70 family, member 13	chr16:75755190-75766818	-	-0.482715	0.131486	-3.67124	0.000241381	0.00214346	Yes	OK	462.028	559.538	388.896	522.828	598.464	557.322	334.556	357.59	453.163	410.274
ENSMUSG00000020034	Tcp11l2	216198	t-complex 11 (mouse) like 2	chr10:84576946-84614355	+	-0.63481	0.172928	-3.67095	0.000241647	0.00214439	Yes	OK	196.95	251.096	156.34	276.169	221.485	255.633	142.072	177.724	183.913	121.651
ENSMUSG00000060240	Cend1	57754	cell cycle exit and neuronal differentiation 1	chr7:141426450-141429420	-	-0.912974	0.248717	-3.67074	0.000241848	0.00214476	Yes	OK	133.106	187.73	92.138	150.334	264.341	148.516	68.7443	132.758	72.8297	94.2199
ENSMUSG00000008496	Pou2f2	18987	POU domain, class 2, transcription factor 2	chr7:25091114-25132460	-	1.04036	0.283485	3.66988	0.000242664	0.00215058	Yes	OK	46.835	26.4006	62.1608	40.6459	21.9968	16.5592	73.3273	53.5314	57.381	64.4035
ENSMUSG00000038690	Atp5j2	57423	ATP synthase, H+ transporting, mitochondrial F0 complex, subunit F2	chr5:145183705-145191592	-	-0.541676	0.147614	-3.66954	0.000242986	0.002152	Yes	OK	186.35	228.831	154.489	233.853	250.308	202.333	151.238	147.747	150.809	168.165
ENSMUSG00000034263	Vwa9	69882	von Willebrand factor A domain containing 9	chr9:64960929-64986981	+	-0.5654	0.154166	-3.66747	0.000244964	0.00216809	Yes	OK	218.577	274.214	176.849	258.909	296.198	267.535	119.157	209.843	178.028	200.366
ENSMUSG00000040712	Camta2	216874	calmodulin binding transcription activator 2	chr11:70669462-70688105	-	0.501008	0.136662	3.66603	0.000246342	0.00217884	Yes	OK	210.922	168.093	243.044	172.049	154.736	177.494	252.063	256.951	216.282	246.88
ENSMUSG00000024800	Rpp30	54364	ribonuclease P/MRP 30 subunit	chr19:36083715-36104773	+	-0.824025	0.224832	-3.66507	0.00024727	0.00218561	Yes	OK	81.5904	111.906	58.8537	90.7572	135.773	109.187	41.2466	81.3678	60.3236	52.4769
ENSMUSG00000021061	Sptb	20741	spectrin beta, erythrocytic	chr12:76580487-76710547	-	0.54089	0.147623	3.66399	0.000248314	0.00219255	Yes	OK	813.251	638.074	944.633	586.303	733.858	594.062	994.501	916.458	773.908	1093.67
ENSMUSG00000019718	L3hypdh	67217	L-3-hydroxyproline dehydratase (trans-)	chr12:72073427-72085313	-	0.972138	0.265327	3.66392	0.000248383	0.00219255	Yes	OK	39.3564	23.6509	51.1355	20.0445	19.342	31.566	45.8295	62.0964	44.1392	52.4769
ENSMUSG00000044258	Ctla2a	13024	cytotoxic T lymphocyte-associated protein 2 alpha	chr13:60934154-60936566	-	-0.822288	0.224511	-3.66258	0.000249688	0.00220227	Yes	OK	125.18	171.964	90.0916	198.775	159.287	157.83	77.9102	98.4978	124.325	59.6329
ENSMUSG00000054920	Klhl5	71778	kelch-like 5	chr5:65131230-65168142	+	-0.69011	0.188434	-3.66234	0.000249918	0.00220227	Yes	OK	975.272	1263.02	759.464	1732.18	1029.68	1027.19	802.017	657.366	843.795	734.677
ENSMUSG00000026781	Acbd5	74159	acyl-Coenzyme A binding domain containing 5	chr2:23068200-23114512	+	-0.740564	0.202214	-3.66228	0.000249978	0.00220227	Yes	OK	389.305	511.372	297.755	693.207	442.97	397.939	371.219	250.527	320.009	249.265
ENSMUSG00000021703	Serinc5	218442	serine incorporator 5	chr13:92611137-92711946	+	-0.634802	0.173362	-3.66171	0.000250534	0.00220572	Yes	OK	1616.78	2053.91	1288.94	2566.26	1533.33	2062.14	1113.66	1391.82	1424.23	1226.05
ENSMUSG00000031939	Taf1d	75316	TATA-box binding protein associated factor, RNA polymerase I, D	chr9:15306213-15316997	+	0.732038	0.199931	3.66145	0.000250794	0.00220577	Yes	OK	330.603	231.548	404.895	157.015	278.373	259.255	522.457	351.166	352.378	393.577
ENSMUSG00000066043	Phactr4	100169	phosphatase and actin regulator 4	chr4:132355924-132422446	-	0.825132	0.225361	3.66137	0.000250869	0.00220577	Yes	OK	130.182	86.2103	163.16	67.9287	65.9904	124.712	192.484	149.888	155.223	155.045
ENSMUSG00000034591	Slc41a2	338365	solute carrier family 41, member 2	chr10:83231138-83337817	-	-0.559021	0.152719	-3.66046	0.00025176	0.00221176	Yes	OK	247.756	307.159	203.203	304.009	260.927	356.541	187.901	214.126	219.96	190.825
ENSMUSG00000048040	Arxes2	76976	adipocyte-related X-chromosome expressed sequence 2	chrX:135993819-135995359	+	-0.519468	0.141918	-3.66034	0.00025188	0.00221176	Yes	OK	193.511	234.688	162.628	261.136	223.002	219.927	164.986	171.301	160.372	153.853
ENSMUSG00000096929	A330023F24Rik	320977	RIKEN cDNA A330023F24 gene	chr1:195017398-195037908	+	0.847105	0.231537	3.65861	0.000253584	0.00222526	Yes	OK	89.7542	58.9233	112.877	48.9977	73.9547	53.8175	100.825	122.052	83.1289	145.504
ENSMUSG00000033257	Ttll4	67534	tubulin tyrosine ligase-like family, member 4	chr1:74661753-74697973	+	0.636513	0.173989	3.65836	0.000253835	0.00222543	Yes	OK	401.676	300.821	477.317	212.138	326.538	363.786	453.713	456.088	481.853	517.613
ENSMUSG00000000711	Rab5b	19344	RAB5B, member RAS oncogene family	chr10:128677182-128696268	-	-0.601269	0.16436	-3.65826	0.000253936	0.00222543	Yes	OK	186.258	233.499	150.827	275.056	218.451	206.99	146.655	167.018	159.637	130
ENSMUSG00000034157	Cipc	217732	CLOCK interacting protein, circadian	chr12:86947040-86965366	+	-0.527766	0.144351	-3.65613	0.00025605	0.00224249	Yes	OK	725.947	887.925	604.463	1041.76	737.651	884.367	554.538	631.671	668.709	562.934
ENSMUSG00000004364	Cul3	26554	cullin 3	chr1:80264922-80340690	-	-0.37359	0.102193	-3.65575	0.000256436	0.0022444	Yes	OK	724.833	832.363	644.186	790.089	887.836	819.165	682.86	644.518	636.34	613.026
ENSMUSG00000038602	Slc35f1	215085	solute carrier family 35, member F1	chr10:52690500-53111622	+	-0.760972	0.20819	-3.65519	0.000256995	0.00224782	Yes	OK	826.802	1098.98	622.671	1577.39	921.589	797.948	682.86	539.597	698.135	570.09
ENSMUSG00000034616	Ssh3	245857	slingshot homolog 3 (Drosophila)	chr19:4261668-4269172	-	0.93001	0.254517	3.65402	0.000258164	0.00225657	Yes	OK	54.5424	33.4983	70.3255	37.8619	26.9271	35.7058	91.6591	40.6839	65.4732	83.486
ENSMUSG00000018820	Zfyve27	319740	zinc finger, FYVE domain containing 27	chr19:42170566-42194592	+	0.555532	0.152045	3.65374	0.000258449	0.0022576	Yes	OK	196.275	153.979	227.996	153.675	139.566	168.697	192.484	278.363	213.34	227.798
ENSMUSG00000051223	Bzw1	66882	basic leucine zipper and W2 domains 1	chr1:58393135-58406548	+	-0.457901	0.125386	-3.65192	0.000260287	0.00227216	Yes	OK	1370.8	1629.61	1176.7	1385.86	1821.18	1681.8	1200.73	1111.31	1255.76	1138.99
ENSMUSG00000049409	Prokr1	58182	prokineticin receptor 1	chr6:87578591-87590701	-	-1.06889	0.292713	-3.65164	0.000260567	0.00227313	Yes	OK	71.4733	109.288	43.1123	62.3608	109.225	156.278	22.9148	53.5314	56.6453	39.3577
ENSMUSG00000022263	Trio	223435	triple functional domain (PTPRF interacting)	chr15:27730648-28025848	-	0.584179	0.16001	3.6509	0.000261325	0.00227826	Yes	OK	3133.99	2410.79	3676.39	2308.46	2017.26	2906.66	3304.31	4147.61	3233.2	4020.45
ENSMUSG00000052512	Nav2	78286	neuron navigator 2	chr7:49246188-49610088	+	0.783094	0.214719	3.64706	0.000265256	0.00231103	Yes	OK	1202.82	824.836	1486.31	694.32	573.433	1206.75	1489.46	1475.33	1259.44	1721
ENSMUSG00000034098	Fstl5	213262	follistatin-like 5	chr3:76074560-76710005	+	-1.45564	0.39958	-3.64293	0.000269548	0.00234531	Yes	OK	186.143	363.807	52.8955	795.1	207.832	88.4884	45.8295	53.5314	47.8175	64.4035
ENSMUSG00000047777	Phf13	230936	PHD finger protein 13	chr4:151989630-151996179	-	0.749932	0.205869	3.64277	0.000269719	0.00234531	Yes	OK	105.368	75.0613	128.098	81.8485	66.7489	76.5865	82.4932	179.866	133.153	116.88
ENSMUSG00000032253	Phip	83946	pleckstrin homology domain interacting protein	chr9:82866158-82975489	-	0.441139	0.121102	3.64272	0.000269777	0.00234531	Yes	OK	1129.32	932.322	1277.07	825.167	960.653	1011.15	1370.3	1113.45	1310.2	1314.31
ENSMUSG00000043998	Mgat2	217664	mannoside acetylglucosaminyltransferase 2	chr12:69184157-69186773	+	-0.531691	0.145964	-3.64261	0.000269892	0.00234531	Yes	OK	191.666	233.5	160.291	255.011	213.141	232.347	160.403	177.724	161.108	141.926
ENSMUSG00000044912	Syt16	238266	synaptotagmin XVI	chr12:73997760-74267916	+	-0.658241	0.180715	-3.64243	0.000270073	0.00234536	Yes	OK	271.071	343.288	216.908	412.026	333.744	284.094	247.48	259.092	180.971	180.091
ENSMUSG00000031467	Agpat5	52123	1-acylglycerol-3-phosphate O-acyltransferase 5 (lysophosphatidic acid acyltransferase, epsilon)	chr8:18846278-18884413	+	-0.404445	0.111048	-3.64209	0.000270437	0.00234644	Yes	OK	462.158	536.409	406.471	555.122	509.719	544.385	421.632	436.816	396.517	370.917
ENSMUSG00000031505	Naxd	69225	NAD(P)HX dehydratase	chr8:11497567-11513286	+	-0.544135	0.149406	-3.64198	0.000270548	0.00234644	Yes	OK	167.604	208.433	136.982	215.479	205.935	203.886	109.991	139.182	135.36	163.394
ENSMUSG00000040584	Abcb1a	18671	ATP-binding cassette, sub-family B (MDR/TAP), member 1A	chr5:8660091-8748570	+	-1.05275	0.289076	-3.64178	0.000270765	0.0023468	Yes	OK	52.148	78.073	32.7042	106.347	80.7813	47.0903	36.6636	21.4126	34.5757	38.165
ENSMUSG00000063652	Slc22a21	56517	solute carrier family 22 (organic cation transporter), member 21	chr11:53950823-53980027	-	1.12437	0.308777	3.64137	0.000271189	0.00234805	Yes	OK	25.7063	12.7452	35.4271	10.0223	10.6191	17.5942	50.4125	34.2601	27.2192	29.8164
ENSMUSG00000039191	Rbpj	19664	recombination signal binding protein for immunoglobulin kappa J region	chr5:53590345-53657445	+	0.564122	0.154923	3.6413	0.00027126	0.00234805	Yes	OK	160.545	125.031	187.18	111.359	124.016	139.719	197.067	162.736	205.247	183.669
ENSMUSG00000001143	Lman2l	214895	lectin, mannose-binding 2-like	chr1:36423185-36445271	-	0.735083	0.201897	3.64089	0.0002717	0.00234892	Yes	OK	146.31	104.33	177.794	123.051	70.9207	119.019	155.82	188.431	177.293	189.633
ENSMUSG00000021461	Fancc	14088	Fanconi anemia, complementation group C	chr13:63311536-63431745	-	0.739479	0.203105	3.64088	0.00027171	0.00234892	Yes	OK	117.553	81.7168	144.431	65.7015	76.9887	102.46	183.318	109.204	145.659	139.541
ENSMUSG00000028800	Hdac1	433759	histone deacetylase 1	chr4:129516103-129542646	-	0.866238	0.238004	3.63959	0.000273069	0.00235914	Yes	OK	87.1324	56.7953	109.885	42.873	46.2691	81.2437	100.825	126.334	116.969	95.4126
ENSMUSG00000025577	Cbx2	12416	chromobox 2	chr11:119023020-119031275	+	0.966951	0.265861	3.63706	0.000275769	0.00238093	Yes	OK	57.2584	35.8056	73.348	25.0557	35.2707	47.0903	41.2466	70.6615	86.0715	95.4126
ENSMUSG00000043895	S1pr2	14739	sphingosine-1-phosphate receptor 2	chr9:20965951-20976793	-	-0.532126	0.146326	-3.63657	0.00027629	0.00238291	Yes	OK	441.868	544.657	364.776	596.882	462.691	574.398	284.143	402.556	403.874	368.531
ENSMUSG00000023235	Ccl25	20300	chemokine (C-C motif) ligand 25	chr8:4349587-4360020	+	0.701201	0.192822	3.63651	0.000276354	0.00238291	Yes	OK	101.947	73.0625	123.61	59.02	71.6792	88.4884	119.157	143.464	112.555	119.266
ENSMUSG00000030237	Slco1a4	28250	solute carrier organic anion transporter family, member 1a4	chr6:141805439-141856171	-	-1.18535	0.326187	-3.63395	0.00027912	0.00240521	Yes	OK	43.3007	69.5138	23.6409	96.8819	76.9887	34.6709	13.7489	27.8363	18.3913	34.5871
ENSMUSG00000032300	1700017B05Rik	74211	RIKEN cDNA 1700017B05 gene	chr9:57252321-57262599	-	0.607413	0.167312	3.63041	0.00028297	0.00243682	Yes	OK	135.762	104.213	159.423	103.563	87.9871	121.089	142.072	164.877	162.579	168.165
ENSMUSG00000053062	Jam2	67374	junction adhesion molecule 2	chr16:84774122-84826375	+	-0.775725	0.213688	-3.63017	0.000283229	0.00243748	Yes	OK	817.361	1094.8	609.277	1603.56	827.534	853.318	572.869	571.716	731.975	560.549
ENSMUSG00000000340	Dbt	13171	dihydrolipoamide branched chain transacylase E2	chr3:116513078-116549981	+	-0.721	0.198646	-3.62958	0.000283886	0.00244063	Yes	OK	105.11	137.249	81.0055	135.301	155.874	120.572	68.7443	111.345	73.5654	70.3668
ENSMUSG00000037706	Cd81	12520	CD81 antigen	chr7:143052749-143067930	+	-0.609723	0.16799	-3.62951	0.000283959	0.00244063	Yes	OK	1896.68	2386.47	1529.35	3083.52	1896.27	2179.61	1361.14	1657.33	1510.3	1588.62
ENSMUSG00000024099	Ndufv2	72900	NADH dehydrogenase (ubiquinone) flavoprotein 2	chr17:66078794-66101559	-	-0.607052	0.167273	-3.6291	0.00028441	0.00244293	Yes	OK	425.962	535.945	343.475	437.639	673.936	496.26	316.224	372.579	377.39	307.706
ENSMUSG00000032511	Scn5a	20271	sodium channel, voltage-gated, type V, alpha	chr9:119483407-119579016	-	1.03842	0.28617	3.62868	0.000284879	0.00244539	Yes	OK	24.1072	14.0258	31.6682	15.5902	12.5154	13.9719	27.4977	32.1189	36.047	31.0091
ENSMUSG00000020486	Sept4	18952	septin 4	chr11:87581060-87590539	+	-0.984838	0.271443	-3.62816	0.00028545	0.00244872	Yes	OK	152.359	220.311	101.395	197.105	347.398	116.432	109.991	104.922	90.4854	100.183
ENSMUSG00000006599	Gtf2h1	14884	general transcription factor II H, polypeptide 1	chr7:46796093-46823800	+	-0.517475	0.142647	-3.62765	0.000286009	0.00245195	Yes	OK	224.777	276.31	186.128	248.329	299.611	280.989	160.403	179.866	207.454	196.788
ENSMUSG00000020590	Snx13	217463	sorting nexin 13	chr12:35047188-35147477	+	-0.489938	0.135068	-3.62734	0.000286351	0.00245331	Yes	OK	597.275	718.964	506.009	841.314	664.075	651.502	527.04	456.088	549.533	491.375
ENSMUSG00000024283	Wac	225131	WW domain containing adaptor with coiled-coil	chr18:7869196-7929028	+	-0.433509	0.119527	-3.62687	0.000286882	0.00245629	Yes	OK	308.541	365.057	266.153	375.278	378.876	341.017	252.063	259.092	264.835	288.623
ENSMUSG00000070427	Il18bp	16068	interleukin 18 binding protein	chr7:102015076-102018155	-	1.01057	0.278749	3.62538	0.000288533	0.00246885	Yes	OK	92.3323	51.8837	122.669	65.7015	37.167	52.7826	215.399	74.944	103.727	96.6053
ENSMUSG00000022283	Pabpc1	18458	poly(A) binding protein, cytoplasmic 1	chr15:36595657-36608973	-	0.701361	0.193473	3.62511	0.000288843	0.00246992	Yes	OK	1116.94	804.137	1351.54	626.392	683.797	1102.22	1324.47	1631.64	1280.04	1170
ENSMUSG00000037260	Hgsnat	52120	heparan-alpha-glucosaminide N-acetyltransferase	chr8:25944458-25976744	-	-0.620182	0.171099	-3.62469	0.000289304	0.00247228	Yes	OK	147.891	190.015	116.298	164.254	195.696	210.095	87.0761	119.91	135.36	122.844
ENSMUSG00000026353	Ubxn4	67812	UBX domain protein 4	chr1:128244180-128279377	+	-0.434133	0.119809	-3.62353	0.00029061	0.00248186	Yes	OK	463.03	547.455	399.712	581.291	565.848	495.225	357.47	436.816	384.747	419.815
ENSMUSG00000053536	Cstf2t	83410	cleavage stimulation factor, 3' pre-RNA subunit 2, tau	chr19:31082840-31086592	+	-0.399426	0.110256	-3.62273	0.00029151	0.00248796	Yes	OK	498.716	580.596	437.306	629.732	576.467	535.588	435.381	438.958	444.335	430.549
ENSMUSG00000063063	Ctnna2	12386	catenin (cadherin associated protein), alpha 2	chr6:76881636-77979667	-	-0.50246	0.138704	-3.62254	0.000291729	0.00248824	Yes	OK	659.41	799.61	554.259	954.899	746.374	697.558	494.959	586.704	576.017	559.356
ENSMUSG00000042750	Bex2	12069	brain expressed X-linked 2	chrX:136066564-136068236	-	-0.70575	0.194841	-3.62217	0.000292138	0.00248933	Yes	OK	342.4	445.558	265.032	307.906	592.017	436.75	261.228	286.928	256.743	255.229
ENSMUSG00000030754	Copb1	70349	coatomer protein complex, subunit beta 1	chr7:114215558-114254680	-	-0.387125	0.106879	-3.62209	0.000292228	0.00248933	Yes	OK	589.381	685.221	517.501	658.129	683.417	714.117	508.708	473.218	556.154	531.925
ENSMUSG00000028517	Plpp3	67916	phospholipid phosphatase 3	chr4:105157346-105232767	+	-0.625014	0.172567	-3.62186	0.000292487	0.00248995	Yes	OK	407.954	516.544	326.512	667.594	487.722	394.317	316.224	325.471	333.987	330.366
ENSMUSG00000024054	Smchd1	74355	SMC hinge domain containing 1	chr17:71344492-71475343	-	-0.382425	0.105638	-3.62015	0.000294437	0.00250496	Yes	OK	679.253	780.841	603.063	773.942	793.401	775.179	682.86	548.162	569.396	611.833
ENSMUSG00000037466	4930427A07Rik	104732	RIKEN cDNA 4930427A07 gene	chr12:113156420-113165458	+	0.921311	0.25454	3.61951	0.000295165	0.00250816	Yes	OK	147.8	91.9599	189.681	46.2138	98.227	131.439	197.067	173.442	179.499	208.715
ENSMUSG00000016319	Slc25a5	11740	solute carrier family 25 (mitochondrial carrier, adenine nucleotide translocator), member 5	chrX:36795596-36798808	+	-0.74362	0.205449	-3.61949	0.000295188	0.00250816	Yes	OK	383.179	506.605	290.609	313.474	632.976	573.363	288.726	280.505	314.124	279.082
ENSMUSG00000040451	Sgms1	208449	sphingomyelin synthase 1	chr19:32122726-32349316	-	-0.575362	0.158989	-3.61888	0.000295886	0.00251249	Yes	OK	193.062	239.451	158.271	285.078	215.417	217.857	160.403	164.877	161.108	146.697
ENSMUSG00000000346	Dazap2	23994	DAZ associated protein 2	chr15:100615661-100620761	+	-0.464271	0.128312	-3.6183	0.000296545	0.0025165	Yes	OK	367.762	443.295	311.113	466.592	453.968	409.324	261.228	304.058	352.378	326.788
ENSMUSG00000024659	Anxa1	16952	annexin A1	chr19:20373433-20390671	-	-1.20996	0.334515	-3.61704	0.000297987	0.00252581	Yes	OK	74.5236	120.229	40.2446	193.207	74.334	93.1457	50.4125	10.7063	58.1166	41.743
ENSMUSG00000029861	Fam131b	76156	family with sequence similarity 131, member B	chr6:42315304-42324640	-	-0.507248	0.140242	-3.61696	0.000298089	0.00252581	Yes	OK	255.718	309.246	215.572	315.145	336.778	275.815	201.65	239.821	194.213	226.605
ENSMUSG00000034640	Tiparp	99929	TCDD-inducible poly(ADP-ribose) polymerase	chr3:65528446-65555518	+	-0.792125	0.21901	-3.61685	0.000298208	0.00252581	Yes	OK	319.975	433.245	235.022	264.476	524.51	510.749	174.152	259.092	261.157	245.687
ENSMUSG00000040035	Disp2	214240	dispatched homolog 2 (Drosophila)	chr2:118779718-118795175	+	-0.649665	0.179723	-3.61482	0.000300562	0.00254414	Yes	OK	822.623	1051.24	651.158	1040.65	882.526	1230.56	540.789	762.287	512.015	789.539
ENSMUSG00000036281	Snapc4	227644	small nuclear RNA activating complex, polypeptide 4	chr2:26362764-26380653	-	0.611349	0.169143	3.61439	0.000301056	0.00254671	Yes	OK	173.025	130.727	204.749	102.45	152.081	137.649	206.233	196.996	192.741	223.027
ENSMUSG00000043411	Usp48	170707	ubiquitin specific peptidase 48	chr4:137594188-137658537	+	0.442669	0.122489	3.61394	0.000301579	0.00254952	Yes	OK	560.402	464.053	632.663	415.367	452.072	524.721	618.699	584.563	654.732	672.659
ENSMUSG00000072647	Adam1a	280668	a disintegrin and metallopeptidase domain 1a	chr5:121518603-121521695	-	0.912274	0.252497	3.61301	0.000302667	0.0025571	Yes	OK	47.6227	28.7978	61.7414	34.5211	22.376	29.4961	87.0761	53.5314	51.4958	54.8622
ENSMUSG00000024301	Kifc5b	16580	kinesin family member C5B	chr17:26917090-26932579	+	1.28956	0.356969	3.61252	0.000303231	0.00256025	Yes	OK	48.4088	19.6827	69.9533	3.89755	20.4798	34.6709	96.242	66.379	55.174	62.0182
ENSMUSG00000022914	Brwd1	93871	bromodomain and WD repeat domain containing 1	chr16:96001547-96082428	-	0.462903	0.128165	3.61177	0.000304112	0.00256608	Yes	OK	677.936	554.367	770.612	503.34	527.923	631.838	806.6	668.072	781.264	826.512
ENSMUSG00000090942	F830016B08Rik	240328	RIKEN cDNA F830016B08 gene	chr18:60293379-60303016	+	1.43873	0.398398	3.6113	0.000304668	0.00256915	Yes	OK	68.2057	8.54995	112.947	10.5791	8.34361	6.72719	229.148	10.7063	83.1289	128.807
ENSMUSG00000035131	Brinp3	215378	bone morphogenetic protein/retinoic acid inducible neural specific 3	chr1:146495665-146902472	+	-0.819834	0.227041	-3.61095	0.000305078	0.00257098	Yes	OK	595.912	810.965	434.622	1224.94	591.638	616.314	462.878	379.002	514.958	381.65
ENSMUSG00000020926	Adam11	11488	a disintegrin and metallopeptidase domain 11	chr11:102761434-102780262	+	0.955399	0.264618	3.61048	0.000305627	0.00257387	Yes	OK	101.17	60.685	131.534	55.1225	93.2967	33.6359	146.655	134.899	116.969	127.614
ENSMUSG00000036339	Tmem260	218989	transmembrane protein 260	chr14:48446351-48515130	+	0.56632	0.156861	3.61033	0.000305804	0.00257387	Yes	OK	169.418	133.138	196.628	139.198	125.154	135.061	192.484	158.453	228.053	207.522
ENSMUSG00000027669	Gnb4	14696	guanine nucleotide binding protein (G protein), beta 4	chr3:32583527-32616535	-	-0.424352	0.117588	-3.60881	0.00030761	0.00258744	Yes	OK	740.185	869.759	643.004	945.991	782.024	881.262	614.116	710.897	645.904	601.099
ENSMUSG00000051506	Wdfy4	545030	WD repeat and FYVE domain containing 4	chr14:32959546-33185066	-	1.11358	0.30888	3.60521	0.000311896	0.00262184	Yes	OK	101.953	52.4299	139.095	79.6213	36.7877	40.8806	242.897	72.8027	96.3706	144.312
ENSMUSG00000042581	Thsd7b	210417	thrombospondin, type I, domain containing 7B	chr1:129273303-130219278	+	-1.06914	0.29658	-3.6049	0.000312275	0.00262338	Yes	OK	107.809	161.43	67.5938	266.147	98.6063	119.537	68.7443	92.074	46.3462	63.2109
ENSMUSG00000071862	Lrrtm2	107065	leucine rich repeat transmembrane neuronal 2	chr18:35209005-35215024	-	-0.62039	0.172119	-3.60443	0.000312841	0.00262649	Yes	OK	384.693	487.583	307.526	620.824	416.043	425.883	279.56	321.189	353.849	275.504
ENSMUSG00000038576	Susd4	96935	sushi domain containing 4	chr1:182764905-182895654	+	-0.55263	0.153489	-3.60047	0.000317647	0.00266517	Yes	OK	675.745	834.233	556.879	1006.12	746.753	749.823	485.793	640.236	601.765	499.724
ENSMUSG00000063406	Tmed5	73130	transmembrane emp24 protein transport domain containing 5	chr5:108121646-108132591	-	-0.486526	0.135161	-3.59962	0.000318688	0.00267223	Yes	OK	252.099	303.732	213.374	333.519	286.337	291.339	210.816	216.267	233.202	193.211
ENSMUSG00000020321	Mdh1	17449	malate dehydrogenase 1, NAD (soluble)	chr11:21556691-21571934	-	-0.573477	0.159389	-3.59797	0.000320716	0.00268755	Yes	OK	706.637	879.449	577.028	787.861	1047.88	802.605	522.457	498.913	572.339	714.402
ENSMUSG00000024830	Rps6kb2	58988	ribosomal protein S6 kinase, polypeptide 2	chr19:4156976-4163245	-	0.695968	0.193451	3.59765	0.000321107	0.00268914	Yes	OK	102.05	74.1007	123.012	56.7928	81.1606	84.3486	119.157	109.204	126.532	137.156
ENSMUSG00000037553	Zdhhc18	503610	zinc finger, DHHC domain containing 18	chr4:133606991-133633429	-	0.52211	0.145201	3.59577	0.000323439	0.00270698	Yes	OK	168.838	135.228	194.045	134.187	124.016	147.481	187.901	182.007	211.868	194.403
ENSMUSG00000015671	Psma2	19166	proteasome (prosome, macropain) subunit, alpha type 2	chr13:14613241-14625673	+	-0.446557	0.124198	-3.59552	0.00032375	0.00270789	Yes	OK	328.694	390.308	282.484	362.472	431.213	377.24	274.977	274.081	299.411	281.467
ENSMUSG00000007603	Dus3l	224907	dihydrouridine synthase 3-like (S. cerevisiae)	chr17:56764750-56770093	+	0.610476	0.16983	3.59463	0.000324849	0.00271539	Yes	OK	185.917	140.581	219.918	110.245	150.564	160.935	215.399	224.832	194.948	244.495
ENSMUSG00000027381	Bcl2l11	12125	BCL2-like 11 (apoptosis facilitator)	chr2:128127574-128131498	+	0.775651	0.215792	3.59443	0.000325104	0.00271582	Yes	OK	83.9056	56.622	104.368	50.6681	47.7861	71.4117	137.489	83.509	102.256	94.2199
ENSMUSG00000037415	Ranbp10	74334	RAN binding protein 10	chr8:105768307-105827350	-	0.542315	0.150893	3.59405	0.000325582	0.00271812	Yes	OK	194.798	153.981	225.411	149.777	133.118	179.047	215.399	226.973	239.823	219.449
ENSMUSG00000034282	Evpl	14027	envoplakin	chr11:116220558-116238091	-	1.13878	0.316975	3.59265	0.000327331	0.00273102	Yes	OK	26.8255	13.2145	37.0338	17.2606	10.9984	11.3845	41.2466	53.5314	23.5409	29.8164
ENSMUSG00000027193	Api5	11800	apoptosis inhibitor 5	chr2:94411726-94438186	-	-0.414344	0.115372	-3.59138	0.000328936	0.0027427	Yes	OK	496.84	581.828	433.099	535.078	641.699	568.706	426.215	434.675	451.691	419.815
ENSMUSG00000020647	Ncoa1	17977	nuclear receptor coactivator 1	chr12:4247361-4477182	-	-0.513226	0.142926	-3.59085	0.000329607	0.00274659	Yes	OK	539.972	661.817	448.588	722.717	650.043	612.692	339.139	462.511	531.142	461.558
ENSMUSG00000026922	Agpat2	67512	1-acylglycerol-3-phosphate O-acyltransferase 2 (lysophosphatidic acid acyltransferase, beta)	chr2:26593056-26604417	-	1.13334	0.315659	3.5904	0.000330177	0.00274962	Yes	OK	18.9441	9.834	25.7767	9.46547	11.7569	8.27962	18.3318	34.2601	24.2766	26.2385
ENSMUSG00000029434	Vps33a	77573	VPS33A CORVET/HOPS core subunit	chr5:123528759-123573015	-	-0.38503	0.107258	-3.58974	0.000331006	0.00275482	Yes	OK	441.317	512.715	387.768	486.637	521.096	530.413	357.47	411.121	397.253	385.228
ENSMUSG00000039735	Fnbp1l	214459	formin binding protein 1-like	chr3:122538718-122619714	-	0.49469	0.137818	3.58944	0.000331391	0.00275631	Yes	OK	409.663	327.422	471.343	278.396	344.743	359.128	536.206	421.828	434.771	492.568
ENSMUSG00000032265	Fam46a	212943	family with sequence similarity 46, member A	chr9:85320438-85327124	-	-0.801631	0.223395	-3.58841	0.000332707	0.00276554	Yes	OK	154.314	212.425	110.731	195.434	197.592	244.249	82.4932	70.6615	138.303	151.468
ENSMUSG00000028161	Ppp3ca	19055	protein phosphatase 3, catalytic subunit, alpha isoform	chr3:136670065-136937727	+	-0.492297	0.137204	-3.58805	0.000333154	0.00276754	Yes	OK	1097.57	1323.45	928.17	1185.41	1584.91	1200.03	857.013	931.447	909.268	1014.95
ENSMUSG00000015714	Cers2	76893	ceramide synthase 2	chr3:95315189-95323599	+	-0.533124	0.148592	-3.58784	0.000333427	0.00276809	Yes	OK	392.861	484.503	324.13	407.015	541.955	504.539	265.811	323.33	372.241	335.137
ENSMUSG00000053279	Aldh1a1	11668	aldehyde dehydrogenase family 1, subfamily A1	chr19:20601981-20643462	+	-1.43213	0.399256	-3.587	0.000334508	0.00277534	Yes	OK	163.644	331.941	37.4206	652.561	225.277	117.985	32.0807	14.9888	19.127	83.486
ENSMUSG00000009621	Vav2	22325	vav 2 oncogene	chr2:27262103-27427608	-	0.467779	0.130422	3.58664	0.000334965	0.00277667	Yes	OK	314.244	254.828	358.806	251.113	231.345	282.024	371.219	387.567	322.216	354.219
ENSMUSG00000020676	Ccl11	20292	chemokine (C-C motif) ligand 11	chr11:82057831-82062955	+	-1.22432	0.341368	-3.5865	0.000335148	0.00277667	Yes	OK	21.4566	35.2377	11.1208	51.2249	32.2367	22.2515	9.16591	10.7063	10.2992	14.3119
ENSMUSG00000061536	Sec22c	215474	SEC22 homolog C, vesicle trafficking protein	chr9:121680044-121705029	-	0.601879	0.167823	3.58639	0.000335291	0.00277667	Yes	OK	149.273	113.142	176.371	109.688	95.193	134.544	192.484	171.301	179.499	162.201
ENSMUSG00000029787	Avl9	78937	AVL9 homolog (S. cerevisiase)	chr6:56714904-56761911	+	-0.516961	0.144161	-3.58599	0.000335799	0.00277844	Yes	OK	361.874	442.8	301.179	482.182	448.279	397.939	288.726	244.103	339.136	332.751
ENSMUSG00000043635	Adamts3	330119	a disintegrin-like and metallopeptidase (reprolysin type) with thrombospondin type 1 motif, 3	chr5:89673840-89883334	-	0.782176	0.218126	3.5859	0.000335919	0.00277844	Yes	OK	129.884	86.6357	162.321	85.7461	92.9175	81.2437	201.65	199.137	102.992	145.504
ENSMUSG00000028567	Txndc12	66073	thioredoxin domain containing 12 (endoplasmic reticulum)	chr4:108834677-108862119	+	-0.510783	0.142751	-3.57815	0.000346031	0.00286031	Yes	OK	259.45	314.872	217.884	354.677	315.161	274.78	229.148	190.572	228.788	223.027
ENSMUSG00000038002	Cramp1l	57354	Crm, cramped-like (Drosophila)	chr17:24961225-25015230	-	0.679145	0.189835	3.57755	0.000346832	0.00286516	Yes	OK	236.073	171.821	284.262	147.55	133.498	234.417	302.475	276.222	278.077	280.275
ENSMUSG00000025586	Cpeb1	12877	cytoplasmic polyadenylation element binding protein 1	chr7:81347025-81454758	-	0.570326	0.159471	3.57635	0.00034842	0.0028765	Yes	OK	115.94	90.8441	134.762	85.7461	95.193	91.5933	119.157	139.182	147.131	133.578
ENSMUSG00000026421	Csrp1	13007	cysteine and glycine-rich protein 1	chr1:135729196-135752229	+	-0.446777	0.125022	-3.57358	0.000352139	0.00290541	Yes	OK	451.066	540.327	384.121	555.679	534.37	530.93	293.309	421.828	423.001	398.348
ENSMUSG00000070056	Mfhas1	52065	malignant fibrous histiocytoma amplified sequence 1	chr8:35587797-35679449	+	-0.549959	0.154059	-3.56978	0.000357276	0.00294492	Yes	OK	238.24	293.622	196.703	290.646	253.342	336.877	183.318	205.561	177.293	220.642
ENSMUSG00000035208	Slfn8	276950	schlafen 8	chr11:83002157-83020810	-	1.21078	0.33918	3.56972	0.000357367	0.00294492	Yes	OK	33.9045	15.2658	47.8835	18.9309	12.8947	13.9719	77.9102	17.1301	30.8975	65.5962
ENSMUSG00000026014	Raph1	77300	Ras association (RalGDS/AF-6) and pleckstrin homology domains 1	chr1:60483184-60566765	-	0.51808	0.145205	3.56791	0.000359841	0.00296349	Yes	OK	515.505	410.999	593.885	437.082	342.088	453.826	614.116	507.478	673.123	580.824
ENSMUSG00000036948	BC037034	231807	cDNA sequence BC037034	chr5:138259657-138264052	-	0.642755	0.180216	3.56657	0.00036168	0.0029768	Yes	OK	147.563	108.219	177.072	105.234	93.676	125.747	210.816	162.736	142.717	192.018
ENSMUSG00000026608	Kctd3	226823	potassium channel tetramerisation domain containing 3	chr1:188971097-189007840	-	-0.758007	0.212572	-3.56588	0.000362642	0.00298288	Yes	OK	445.964	591.962	336.465	353.563	652.318	770.004	348.305	361.872	314.86	320.825
ENSMUSG00000042810	Krba1	77827	KRAB-A domain containing 1	chr6:48395585-48419855	+	0.510551	0.143188	3.56559	0.000363033	0.00298427	Yes	OK	306.718	245.567	352.581	213.808	227.932	294.961	339.139	357.59	364.149	349.449
ENSMUSG00000073481	Marc2	67247	mitochondrial amidoxime reducing component 2	chr1:184813067-184845847	-	-0.471474	0.132259	-3.56477	0.000364182	0.00299188	Yes	OK	452.06	534.632	390.131	546.213	522.613	535.07	458.295	415.404	370.769	316.054
ENSMUSG00000022983	Scaf4	224432	SR-related CTD-associated factor 4	chr16:90229143-90284425	-	0.69878	0.196058	3.56415	0.000365038	0.00299707	Yes	OK	187.4	135.133	226.601	111.915	107.708	185.774	233.731	216.267	230.995	225.412
ENSMUSG00000034820	Cpsf7	269061	cleavage and polyadenylation specific factor 7	chr19:10525243-10547735	+	0.45905	0.128884	3.56172	0.000368429	0.00302306	Yes	OK	330.105	273.431	372.611	249.443	279.511	291.339	325.39	361.872	421.53	381.65
ENSMUSG00000063687	Pcdhb5	93876	protocadherin beta 5	chr18:37320380-37323913	+	-0.80582	0.226289	-3.56102	0.000369418	0.00302932	Yes	OK	132.895	179.342	98.0599	233.296	163.459	141.271	119.157	79.2265	119.912	73.9448
ENSMUSG00000047767	Atg16l2	73683	autophagy related 16-like 2 (S. cerevisiae)	chr7:101289615-101302088	-	0.682473	0.191666	3.56074	0.000369807	0.00303065	Yes	OK	170.166	125.717	203.503	164.254	101.64	111.257	164.986	205.561	228.788	214.678
ENSMUSG00000037788	Vopp1	232023	vesicular, overexpressed in cancer, prosurvival protein 1	chr6:57752263-57825125	-	-0.542368	0.152328	-3.56054	0.000370097	0.00303118	Yes	OK	225.638	272.632	190.392	284.521	294.302	239.074	229.148	194.854	176.557	161.009
ENSMUSG00000039323	Igfbp2	16008	insulin-like growth factor binding protein 2	chr1:72825386-72852471	+	-1.18788	0.333689	-3.55985	0.000371073	0.00303731	Yes	OK	724.69	1157.24	400.275	619.153	1369.49	1483.09	247.48	575.998	437.714	339.907
ENSMUSG00000029165	Agbl5	231093	ATP/GTP binding protein-like 5	chr5:30888934-30906666	+	0.697366	0.19603	3.55744	0.000374486	0.00306337	Yes	OK	75.4124	55.8259	90.1023	57.9064	50.0616	59.5097	64.1614	104.922	97.1063	94.2199
ENSMUSG00000040612	Ildr2	100039795	immunoglobulin-like domain containing receptor 2	chr1:166254138-166316832	+	-0.727327	0.204469	-3.55715	0.000374894	0.00306484	Yes	OK	619.89	816.674	472.303	1143.65	659.524	646.845	453.713	387.567	570.867	477.063
ENSMUSG00000066441	Rdh11	17252	retinol dehydrogenase 11	chr12:79175550-79191819	-	-0.537949	0.151259	-3.55647	0.000375865	0.0030709	Yes	OK	253.426	313.852	208.108	286.191	350.052	305.311	178.735	201.278	250.858	201.559
ENSMUSG00000022641	Bbx	70508	bobby sox homolog (Drosophila)	chr16:50191843-50432389	-	0.59395	0.167015	3.55627	0.000376154	0.00307139	Yes	OK	372.722	286.974	437.032	288.975	232.483	339.464	407.883	355.449	486.267	498.531
ENSMUSG00000054387	Mdm4	17248	transformed mouse 3T3 cell double minute 4	chr1:132986104-133025416	-	0.578653	0.162813	3.55408	0.000379298	0.00309517	Yes	OK	532.332	412.968	621.855	384.187	372.428	482.288	554.538	496.772	696.664	739.448
ENSMUSG00000039646	Vasn	246154	vasorin	chr16:4639944-4651166	+	0.747815	0.210456	3.55331	0.000380415	0.0031024	Yes	OK	103.858	74.4257	125.933	76.2806	59.543	87.4535	82.4932	156.312	145.659	119.266
ENSMUSG00000020458	Rtn4	68585	reticulon 4	chr11:29693773-29744414	+	-0.490833	0.138203	-3.55154	0.000382985	0.0031211	Yes	OK	1295.55	1567.01	1091.96	1578.51	1493.51	1629.01	834.098	1092.04	1201.32	1240.36
ENSMUSG00000027230	Creb3l1	26427	cAMP responsive element binding protein 3-like 1	chr2:91982327-92024170	-	0.914789	0.257585	3.55141	0.000383174	0.0031211	Yes	OK	52.5789	32.4328	67.6885	38.9755	23.1345	35.1884	87.0761	57.8139	75.7723	50.0916
ENSMUSG00000024065	Ehd3	57440	EH-domain containing 3	chr17:73804840-73832093	+	-0.581689	0.163818	-3.55083	0.000384012	0.00312518	Yes	OK	549.077	685.837	446.507	819.042	559.022	679.446	407.883	462.511	530.406	385.228
ENSMUSG00000020715	Ern1	78943	endoplasmic reticulum (ER) to nucleus signalling 1	chr11:106397619-106487796	-	0.642271	0.180883	3.55075	0.000384142	0.00312518	Yes	OK	125.599	93.7502	149.486	103.007	73.1962	105.048	155.82	134.899	148.602	158.623
ENSMUSG00000041528	Rnf123	84585	ring finger protein 123	chr9:108051671-108079301	-	0.552651	0.155654	3.55051	0.000384493	0.00312613	Yes	OK	205.624	159.339	240.338	150.891	151.702	175.424	261.228	229.114	197.891	273.119
ENSMUSG00000030868	Dctn5	59288	dynactin 5	chr7:122133040-122149044	+	-0.515628	0.14524	-3.55017	0.000384977	0.00312817	Yes	OK	233.63	285.285	194.889	317.372	291.647	246.836	178.735	205.561	210.397	184.862
ENSMUSG00000030591	Psmd8	57296	proteasome (prosome, macropain) 26S subunit, non-ATPase, 8	chr7:29174186-29180673	-	-0.423081	0.119232	-3.54837	0.000387618	0.00314772	Yes	OK	457.674	539.999	395.931	496.659	575.33	548.007	357.47	417.545	431.829	376.88
ENSMUSG00000106847	Peg13	353342	paternally expressed 13	chr15:72805599-72810324	-	-0.463679	0.130714	-3.54727	0.000389238	0.00315896	Yes	OK	486.771	581.512	415.715	590.757	606.808	546.972	352.888	498.913	378.126	432.935
ENSMUSG00000031433	Rbm41	237073	RNA binding motif protein 41	chrX:139941527-139998595	-	-0.669498	0.188866	-3.54484	0.000392854	0.00318638	Yes	OK	96.4938	124.837	75.2365	139.198	116.811	118.502	77.9102	57.8139	75.7723	89.4493
ENSMUSG00000060586	H2-Eb1	14969	histocompatibility 2, class II antigen E beta	chr17:34305866-34316674	+	1.4112	0.398156	3.54434	0.000393602	0.00318962	Yes	OK	401.638	52.1458	663.757	107.461	18.9627	30.0136	1402.38	182.007	432.564	638.072
ENSMUSG00000032360	Hcrtr2	387285	hypocretin (orexin) receptor 2	chr9:76225879-76323578	-	-1.32955	0.375129	-3.54425	0.00039373	0.00318962	Yes	OK	19.921	35.4861	8.2471	17.2606	25.0308	64.167	4.58295	8.56503	10.2992	9.54126
ENSMUSG00000041215	Yeats2	208146	YEATS domain containing 2	chr16:20141062-20172530	+	0.453185	0.127871	3.54408	0.000393982	0.00318973	Yes	OK	510.624	420.177	578.459	373.608	394.804	492.12	554.538	590.987	576.752	591.558
ENSMUSG00000038552	Fndc4	64339	fibronectin type III domain containing 4	chr5:31292245-31295877	-	-0.415646	0.117292	-3.5437	0.000394557	0.00319246	Yes	OK	370.643	433.891	323.208	466.035	430.454	405.184	316.224	329.754	304.561	342.293
ENSMUSG00000022353	Mtss1	211401	metastasis suppressor 1	chr15:58941233-59082026	-	0.490269	0.138383	3.54285	0.000395821	0.00320075	Yes	OK	786.287	634.749	899.941	753.897	576.467	573.881	834.098	1023.52	845.266	896.878
ENSMUSG00000049288	Lix1l	280411	Lix1-like	chr3:96601132-96625352	+	-0.52892	0.149361	-3.54121	0.000398292	0.00321688	Yes	OK	791.577	972.797	655.662	858.017	990.235	1070.14	481.21	693.767	735.654	712.017
ENSMUSG00000079316	Rab9	56382	RAB9, member RAS oncogene family	chrX:166457251-166479867	-	-0.591567	0.167052	-3.54121	0.000398297	0.00321688	Yes	OK	131.378	162.141	108.306	163.14	177.871	145.411	128.323	94.2153	98.5776	112.11
ENSMUSG00000029166	Mapre3	100732	microtubule-associated protein, RP/EB family, member 3	chr5:30861806-30866106	+	0.566733	0.160077	3.54038	0.000399548	0.00322504	Yes	OK	174.292	136.054	202.971	129.176	119.086	159.9	201.65	177.724	211.868	220.642
ENSMUSG00000020807	4933427D14Rik	74477	RIKEN cDNA 4933427D14 gene	chr11:72154096-72203371	-	0.616715	0.174215	3.53997	0.000400174	0.00322815	Yes	OK	104.985	79.5452	124.066	70.7127	83.0568	84.8661	128.323	102.78	128.004	137.156
ENSMUSG00000078937	Cpt1b	12895	carnitine palmitoyltransferase 1b, muscle	chr15:89416404-89425862	-	1.02625	0.289958	3.5393	0.000401192	0.00323424	Yes	OK	25.2078	14.0668	33.5636	13.9198	13.2739	15.0068	41.2466	25.6951	27.9548	39.3577
ENSMUSG00000028911	Srsf4	57317	serine/arginine-rich splicing factor 4	chr4:131873638-131901725	+	0.795591	0.224806	3.53901	0.000401635	0.00323424	Yes	OK	125.366	84.6719	155.887	61.2472	71.6792	121.089	160.403	169.159	135.36	158.623
ENSMUSG00000025571	Tnrc6c	217351	trinucleotide repeat containing 6C	chr11:117654288-117763441	+	0.495663	0.140058	3.539	0.000401653	0.00323424	Yes	OK	685.887	552.098	786.228	451.559	546.506	658.23	783.685	747.299	823.196	790.732
ENSMUSG00000071265	1700086L19Rik	74284	RIKEN cDNA 1700086L19 gene	chr12:74284275-74295950	+	-0.820765	0.231959	-3.5384	0.00040256	0.0032396	Yes	OK	83.1413	113.71	60.2145	140.869	116.431	83.8311	64.1614	51.3902	72.8297	52.4769
ENSMUSG00000020681	Ace	11421	angiotensin I converting enzyme (peptidyl-dipeptidase A) 1	chr11:105967944-105989964	+	-1.18144	0.333963	-3.53764	0.000403719	0.00324697	Yes	OK	46.7019	74.8871	25.563	65.1447	121.741	37.7758	27.4977	12.8475	30.8975	31.0091
ENSMUSG00000020888	Dvl2	13543	dishevelled segment polarity protein 2	chr11:70000625-70010109	+	0.579302	0.163799	3.53665	0.00040523	0.00325585	Yes	OK	130.632	99.873	153.702	86.8596	102.02	110.74	155.82	171.301	149.338	138.348
ENSMUSG00000044948	Cfap43	100048534	cilia and flagella associated protein 43	chr19:47736856-47837361	-	0.69969	0.197842	3.5366	0.00040531	0.00325585	Yes	OK	96.0934	68.8006	116.563	63.4744	56.509	86.4185	123.74	117.769	106.67	118.073
ENSMUSG00000044948	Itprip	414801	inositol 1,4,5-triphosphate receptor interacting protein	chr19:47894595-47919299	-	0.69969	0.197842	3.5366	0.00040531	0.00325585	Yes	OK	96.0934	68.8006	116.563	63.4744	56.509	86.4185	123.74	117.769	106.67	118.073
ENSMUSG00000059939	9430015G10Rik	230996	RIKEN cDNA 9430015G10 gene	chr4:156109997-156127263	+	0.764711	0.216259	3.53609	0.000406103	0.00326027	Yes	OK	114.32	79.2275	140.64	59.5768	73.5755	104.53	123.74	164.877	117.705	156.238
ENSMUSG00000030924	2610020H08Rik	434234	RIKEN cDNA 2610020H08 gene	chr7:119794186-119848941	+	0.747632	0.211449	3.53575	0.000406623	0.00326249	Yes	OK	67.2885	46.965	82.5312	39.5323	47.0276	54.335	91.6591	64.2377	82.3932	91.8346
ENSMUSG00000033417	Cacul1	78832	CDK2 associated, cullin domain 1	chr19:60524695-60581023	-	-0.449827	0.127283	-3.53408	0.0004092	0.0032812	Yes	OK	332.608	399.198	282.666	414.81	378.117	404.666	242.897	263.375	311.917	312.476
ENSMUSG00000047694	Yipf6	77929	Yip1 domain family, member 6	chrX:98937780-98949020	+	-0.505921	0.143184	-3.53336	0.00041031	0.00328635	Yes	OK	438.836	527.376	372.431	555.679	547.265	479.183	462.878	295.493	385.482	345.871
ENSMUSG00000044149	Nkrf	77286	NF-kappaB repressing factor	chrX:36887541-36902899	-	-0.58446	0.165413	-3.53335	0.000410333	0.00328635	Yes	OK	132.824	164.44	109.112	151.448	185.076	156.795	123.74	98.4978	114.026	100.183
ENSMUSG00000026196	Bard1	12021	BRCA1 associated RING domain 1	chr1:71027534-71102972	-	0.974689	0.275879	3.53303	0.000410828	0.00328834	Yes	OK	106.189	62.5887	138.889	27.8396	70.9207	89.0059	160.403	132.758	122.854	139.541
ENSMUSG00000059970	Hspa2	15512	heat shock protein 2	chr12:76404369-76406936	+	-0.715894	0.2027	-3.5318	0.000412743	0.0033017	Yes	OK	140.241	187.015	105.161	159.243	172.561	229.242	59.5784	130.617	114.762	115.688
ENSMUSG00000029076	Sdf4	20318	stromal cell derived factor 4	chr4:155993336-156013610	+	-0.465562	0.131827	-3.5316	0.000413054	0.00330221	Yes	OK	646.828	772.428	552.628	805.122	816.157	696.005	485.793	668.072	531.878	524.769
ENSMUSG00000042766	Trim46	360213	tripartite motif-containing 46	chr3:89234176-89245897	-	0.633179	0.17938	3.52982	0.000415839	0.00332249	Yes	OK	143.991	109.684	169.721	118.597	89.8834	120.572	128.323	182.007	166.993	201.559
ENSMUSG00000021945	Zmym2	76007	zinc finger, MYM-type 2	chr14:56887794-56962579	+	-0.406997	0.115311	-3.52955	0.000416259	0.00332387	Yes	OK	608.118	710.722	531.165	711.581	732.341	688.243	554.538	451.805	580.431	537.889
ENSMUSG00000092837	Rpph1	85029	ribonuclease P RNA component H1	chr14:50807446-50807771	-	1.34445	0.380961	3.52912	0.000416951	0.00332741	Yes	OK	1079.66	374.692	1608.39	203.229	260.548	660.299	1746.11	1552.41	753.309	2381.74
ENSMUSG00000020733	Slc9a3r1	26941	solute carrier family 9 (sodium/hydrogen exchanger), member 3 regulator 1	chr11:115163340-115181178	+	0.872701	0.247328	3.52852	0.000417889	0.00333291	Yes	OK	66.4477	41.9403	84.8283	51.7817	48.1654	25.8738	100.825	85.6503	76.508	76.3301
ENSMUSG00000034252	Senp6	215351	SUMO/sentrin specific peptidase 6	chr9:80066902-80144781	+	-0.392461	0.111245	-3.5279	0.000418877	0.00333769	Yes	OK	639.678	745.061	560.64	797.884	758.889	678.411	536.206	533.173	580.431	592.751
ENSMUSG00000008348	Ubc	22190	ubiquitin C	chr5:125385964-125390017	-	-0.448269	0.127072	-3.52767	0.000419236	0.00333769	Yes	OK	504.37	599.645	432.913	629.732	544.61	624.594	435.381	389.709	495.095	411.467
ENSMUSG00000035941	Ibtk	108837	inhibitor of Bruton agammaglobulinemia tyrosine kinase	chr9:85687359-85749334	-	0.448416	0.127114	3.52767	0.000419236	0.00333769	Yes	OK	285.472	238.163	320.953	230.512	232.483	251.493	256.645	351.166	332.515	343.485
ENSMUSG00000040865	Ino80d	227195	INO80 complex subunit D	chr1:63047800-63114267	-	0.523943	0.148543	3.52722	0.000419954	0.00334142	Yes	OK	489.329	388.15	565.213	371.937	321.608	470.903	591.201	516.043	606.179	547.43
ENSMUSG00000032582	Rbm6	19654	RNA binding motif protein 6	chr9:107773558-107872819	-	0.4107	0.116474	3.52612	0.000421697	0.00335329	Yes	OK	403.514	336.108	454.068	357.461	315.54	335.324	508.708	413.263	430.357	463.944
ENSMUSG00000002393	Nr2f6	13864	nuclear receptor subfamily 2, group F, member 6	chr8:71374118-71381952	-	1.0722	0.304101	3.5258	0.000422199	0.00335529	Yes	OK	32.0538	17.5826	42.9072	12.8062	12.5154	27.4262	36.6636	51.3902	38.254	45.321
ENSMUSG00000029103	Lrpap1	16976	low density lipoprotein receptor-related protein associated protein 1	chr5:35091505-35105697	-	-0.602962	0.17105	-3.52505	0.000423401	0.00336285	Yes	OK	358.556	454.298	286.75	552.895	442.59	367.408	215.399	293.352	312.653	325.596
ENSMUSG00000099083	Atf7	223922	activating transcription factor 7	chr15:102528635-102625464	-	0.636197	0.180602	3.52265	0.000427256	0.00338668	Yes	OK	300.935	225.907	357.205	234.966	169.527	273.227	357.47	291.211	416.38	363.761
ENSMUSG00000036368	Rmdn2	381110	regulator of microtubule dynamics 2	chr17:79614899-79682152	+	-0.730357	0.20734	-3.5225	0.000427495	0.00338668	Yes	OK	84.4848	112.281	63.6377	123.608	114.914	98.3204	59.5784	64.2377	79.4506	51.2843
ENSMUSG00000022791	Tnk2	51789	tyrosine kinase, non-receptor, 2	chr16:32673153-32683493	+	0.551481	0.156565	3.52239	0.000427674	0.00338668	Yes	OK	519.087	406.383	603.615	437.082	309.093	472.973	568.286	655.225	567.189	623.76
ENSMUSG00000033161	Atp1a1	11928	ATPase, Na+/K+ transporting, alpha 1 polypeptide	chr3:101576218-101604707	-	-0.738595	0.209688	-3.52236	0.00042773	0.00338668	Yes	OK	2747.57	3631.81	2084.39	2482.74	4009.48	4403.2	1484.88	2372.51	2408.53	2071.65
ENSMUSG00000006941	Eif1b	68969	eukaryotic translation initiation factor 1B	chr9:120492605-120495327	+	-0.528488	0.150042	-3.52225	0.000427894	0.00338668	Yes	OK	235.093	283.791	198.57	293.986	296.577	260.808	247.48	154.17	183.913	208.715
ENSMUSG00000028252	Ccnc	51813	cyclin C	chr4:21727700-21750547	+	-0.550269	0.156227	-3.52224	0.000427919	0.00338668	Yes	OK	205.937	250.348	172.629	247.216	263.203	240.626	197.067	190.572	172.879	130
ENSMUSG00000067279	Ppp1r3c	53412	protein phosphatase 1, regulatory (inhibitor) subunit 3C	chr19:36731730-36736604	-	-0.600486	0.170541	-3.52108	0.000429796	0.00339947	Yes	OK	121.995	155.97	96.5132	152.004	166.872	149.033	77.9102	87.7915	111.819	108.532
ENSMUSG00000048721	Fndc9	320116	fibronectin type III domain containing 9	chr11:46235556-46239871	+	1.01142	0.287261	3.52093	0.000430043	0.00339947	Yes	OK	33.3922	20.1493	43.3244	21.7149	14.4117	24.3214	22.9148	55.6727	52.9671	41.743
ENSMUSG00000079165	Sap25	751865	sin3 associated polypeptide	chr5:137641472-137642902	+	1.16565	0.331096	3.52058	0.000430606	0.00340191	Yes	OK	23.7994	11.4117	33.0901	6.12472	9.48137	18.6291	41.2466	27.8363	28.6905	34.5871
ENSMUSG00000022550	Adck5	268822	aarF domain containing kinase 5	chr15:76576358-76595811	+	0.800786	0.227478	3.52028	0.000431095	0.00340377	Yes	OK	54.5002	36.1143	68.2896	32.8508	41.3388	34.1534	68.7443	85.6503	60.3236	58.4402
ENSMUSG00000086859	Snhg20	76972	small nucleolar RNA host gene 20	chr11:117076782-117078955	+	0.947346	0.269179	3.51939	0.000432537	0.00341314	Yes	OK	40.1239	25.2229	51.2996	23.3853	26.9271	25.3563	32.0807	49.2489	46.3462	77.5227
ENSMUSG00000036299	BC031181	407819	cDNA sequence BC031181	chr18:75005899-75009933	+	-0.55727	0.158389	-3.51835	0.000434234	0.00342452	Yes	OK	138.613	169.656	115.33	184.855	169.906	154.208	128.323	107.063	106.67	119.266
ENSMUSG00000052609	Plekhg3	263406	pleckstrin homology domain containing, family G (with RhoGef domain) member 3	chr12:76533559-76579039	+	0.765309	0.217629	3.51657	0.000437156	0.00344553	Yes	OK	78.1315	55.5046	95.1016	70.1559	50.8202	45.5379	68.7443	102.78	111.084	97.7979
ENSMUSG00000027966	Col11a1	12814	collagen, type XI, alpha 1	chr3:114030539-114220756	+	0.773739	0.220066	3.51594	0.0004382	0.00345173	Yes	OK	4993.05	3436.54	6160.43	2932.07	2692.33	4685.23	4289.65	6423.77	7024.02	6904.29
ENSMUSG00000006522	Itih3	16426	inter-alpha trypsin inhibitor, heavy chain 3	chr14:30908573-30923587	-	-1.19207	0.339072	-3.51568	0.000438627	0.00345223	Yes	OK	34.0737	54.7396	18.5743	54.0089	78.1265	32.0835	13.7489	23.5538	9.5635	27.4311
ENSMUSG00000030257	Srgap3	259302	SLIT-ROBO Rho GTPase activating protein 3	chr6:112717971-112947266	-	0.470148	0.133732	3.51559	0.00043878	0.00345223	Yes	OK	651.281	532.384	740.454	545.657	488.48	563.014	623.282	869.35	676.066	793.117
ENSMUSG00000051339	2900026A02Rik	243219	RIKEN cDNA 2900026A02 gene	chr5:113086322-113163313	-	0.802233	0.228275	3.51432	0.000440874	0.00346574	Yes	OK	148.142	100.051	184.211	129.733	59.1638	111.257	187.901	201.278	179.499	168.165
ENSMUSG00000033047	Eif3l	223691	eukaryotic translation initiation factor 3, subunit L	chr15:79075222-79094400	+	-0.473596	0.134765	-3.51424	0.000441015	0.00346574	Yes	OK	563.028	674.357	479.532	555.679	744.477	722.914	458.295	494.63	502.451	462.751
ENSMUSG00000022159	Rab2b	76338	RAB2B, member RAS oncogene family	chr14:52261758-52279395	-	-0.689162	0.196164	-3.5132	0.000442738	0.00347724	Yes	OK	120.614	159.998	91.075	180.958	163.459	135.579	64.1614	85.6503	115.498	98.9906
ENSMUSG00000035232	Pdk3	236900	pyruvate dehydrogenase kinase, isoenzyme 3	chrX:93764615-93832095	-	-0.571498	0.162694	-3.51271	0.000443554	0.00348161	Yes	OK	133.141	165.65	108.759	170.935	166.114	159.9	119.157	87.7915	124.325	103.761
ENSMUSG00000048285	Frmd6	319710	FERM domain containing 6	chr12:70825513-70902234	+	0.819745	0.233453	3.51139	0.000445764	0.00349691	Yes	OK	164.863	111.22	205.095	151.448	69.4036	112.81	187.901	173.442	257.479	201.559
ENSMUSG00000041633	Kctd12b	207474	potassium channel tetramerisation domain containing 12b	chrX:153685153-153696280	-	-1.01394	0.288885	-3.50985	0.000448351	0.00351515	Yes	OK	179.02	263.963	115.312	440.423	178.629	172.837	142.072	66.379	138.303	114.495
ENSMUSG00000039809	Gabbr2	242425	gamma-aminobutyric acid (GABA) B receptor, 2	chr4:46663897-46991714	-	-0.904418	0.257708	-3.50947	0.000449004	0.00351821	Yes	OK	207.622	290.777	145.256	322.94	395.184	154.208	164.986	164.877	104.463	146.697
ENSMUSG00000046844	Vat1l	270097	vesicle amine transport protein 1 like	chr8:114205639-114374070	+	-0.786277	0.224072	-3.50904	0.000449732	0.00352185	Yes	OK	335.588	455.15	245.916	542.316	456.244	366.891	164.986	214.126	222.903	381.65
ENSMUSG00000038406	Scaf1	233208	SR-related CTD-associated factor 1	chr7:45002949-45016249	-	0.685336	0.1954	3.50735	0.000452594	0.00354219	Yes	OK	393.809	285.437	475.088	208.24	257.893	390.177	462.878	554.585	414.173	468.714
ENSMUSG00000029084	Cd38	12494	CD38 antigen	chr5:43868808-43912374	+	-0.858164	0.244783	-3.50582	0.000455203	0.00356053	Yes	OK	71.5314	99.1121	50.8458	129.176	89.5042	78.6564	59.5784	32.1189	54.4384	57.2476
ENSMUSG00000023452	Pisd	320951	phosphatidylserine decarboxylase	chr5:32736313-32785626	-	-0.661777	0.188806	-3.50507	0.000456481	0.00356844	Yes	OK	148.183	190.489	116.454	177.06	195.696	198.711	100.825	152.029	129.475	83.486
ENSMUSG00000034438	Gbp8	76074	guanylate-binding protein 8	chr5:105014152-105053561	-	1.39816	0.398949	3.50462	0.000457264	0.00357248	Yes	OK	14.6392	3.31756	23.1305	6.12472	2.27553	1.55243	41.2466	4.28251	8.82784	38.165
ENSMUSG00000049076	Acap2	78618	ArfGAP with coiled-coil, ankyrin repeat and PH domains 2	chr16:31092412-31201238	-	-0.360979	0.103018	-3.50404	0.000458258	0.00357815	Yes	OK	604.74	693.956	537.829	659.242	722.481	700.145	554.538	496.772	556.154	543.852
ENSMUSG00000035885	Cox8a	12868	cytochrome c oxidase subunit VIIIa	chr19:7215157-7217616	-	-0.612008	0.17468	-3.50361	0.000459005	0.00358104	Yes	OK	247.84	311.265	200.271	237.75	336.399	359.646	192.484	229.114	174.35	205.137
ENSMUSG00000024940	Ltbp3	16998	latent transforming growth factor beta binding protein 3	chr19:5740903-5758532	+	0.732804	0.209163	3.50351	0.000459163	0.00358104	Yes	OK	328.065	232.627	399.644	234.966	148.289	314.625	339.139	443.24	417.851	398.348
ENSMUSG00000032047	Acat1	110446	acetyl-Coenzyme A acetyltransferase 1	chr9:53580521-53610350	-	-0.579151	0.165318	-3.50326	0.000459599	0.00358236	Yes	OK	565.11	701.829	462.571	519.487	856.358	729.641	481.21	466.794	469.347	432.935
ENSMUSG00000022206	Npr3	18162	natriuretic peptide receptor 3	chr15:11839895-11907371	-	1.22594	0.349999	3.5027	0.000460574	0.00358787	Yes	OK	21.5812	9.3276	30.7714	5.56793	15.1702	7.24466	41.2466	25.6951	38.254	17.8899
ENSMUSG00000020333	Acsl6	216739	acyl-CoA synthetase long-chain family member 6	chr11:54304203-54361539	+	-0.580509	0.165848	-3.50024	0.000464838	0.00361898	Yes	OK	358.622	447.536	291.937	443.207	530.957	368.443	261.228	293.352	258.95	354.219
ENSMUSG00000035227	Spcs2	66624	signal peptidase complex subunit 2 homolog (S. cerevisiae)	chr7:99837568-99858883	-	-0.432393	0.123568	-3.49922	0.000466628	0.00363081	Yes	OK	467.65	555.694	401.616	600.779	530.198	536.105	357.47	381.144	457.577	410.274
ENSMUSG00000058594	Fbxo18	50755	F-box protein 18	chr2:11742572-11777527	-	-0.422921	0.120869	-3.49901	0.000466987	0.00363149	Yes	OK	434.433	511.932	376.309	554.009	465.346	516.441	371.219	355.449	411.23	367.339
ENSMUSG00000024238	Zeb1	21417	zinc finger E-box binding homeobox 1	chr18:5591859-5775468	+	-0.619064	0.177038	-3.49679	0.00047089	0.00365971	Yes	OK	3000.19	3782.41	2413.53	4682.63	3191.81	3472.78	3033.92	2411.06	2092.2	2116.97
[truncated: 1,827 more rows]
