# Supplementary material for: A tumor suppressor role for EZH2 in diffuse midline glioma pathogenesis
Source: Acta Neuropathol Commun. 2022 Apr 8;10:47. doi: 10.1186/s40478-022-01336-5 (PMC8994223; doi:10.1186/s40478-022-01336-5)
Supplement: Supplementary file 4 — Additional file 4. List of significantly differentially expressed genes comparing EZH2 GOF vs. EZH2 WT in the context of PDGFB and p53 shRNA. [file 40478_2022_1336_MOESM4_ESM.xlsx]

## Sheet: RCAS_Y_vs_RCAS_CRE_Differential
Ensembl ID	Gene Symbol	Entrez ID	Description	Location	Strand	Log2 Fold Change	LFC Standard Error	Wald Statistic	p Value	FDR Adj p Value	Significant	Status	Base Mean	RCAS_Y	RCAS_CRE	RCAS_Y_1_S18	RCAS_Y_2_S19	RCAS_Y_3_S20	RCAS_CRE_1_S21	RCAS_CRE_2_S22	RCAS_CRE_3_S23	RCAS_CRE_4_S24
ENSMUSG00000044165	Bcl2l15	229672	BCLl2-like 15	chr3:103832695-103838648	+	-5.79599	0.413618	-14.0129	1.29945e-44	2.10161e-40	Yes	OK	205.35	472.913	4.67721	330.779	354.229	733.731	5.16447	3.34442	6.43462	3.76532
ENSMUSG00000028946	Hes3	15207	hairy and enhancer of split 3 (Drosophila)	chr4:152285971-152291662	-	-5.21034	0.428301	-12.1651	4.76738e-34	3.85514e-30	Yes	OK	133.961	306.509	4.55009	234.746	238.385	446.396	2.58224	6.01995	5.36218	4.23598
ENSMUSG00000052854	Nrk	27206	Nik related kinase	chrX:138914429-139009090	+	-5.31259	0.473524	-11.2193	3.27928e-29	1.76786e-25	Yes	OK	183.729	422.483	4.66376	138.714	469.404	659.332	6.45559	4.0133	5.36218	2.82399
ENSMUSG00000018581	Dnah11	13411	dynein, axonemal, heavy chain 11	chr12:117877981-118199043	-	-3.63852	0.34854	-10.4393	1.63969e-25	6.62966e-22	Yes	OK	419.017	901.056	57.488	789.601	753.323	1160.24	36.1513	75.5838	81.5052	36.7118
ENSMUSG00000034384	Barhl2	104382	BarH-like 2 (Drosophila)	chr5:106452522-106458166	-	-5.44678	0.525182	-10.3712	3.35235e-25	1.08435e-21	Yes	OK	163.579	378.613	2.30348	266.757	350.211	518.871	0.645559	5.35107	3.21731	0
ENSMUSG00000014198	Zfp385c	278304	zinc finger protein 385C	chr11:100626218-100650693	-	-4.72725	0.473175	-9.99049	1.67758e-23	4.52193e-20	Yes	OK	121.956	277.504	5.29576	138.714	360.925	332.873	5.16447	4.0133	9.65193	2.35332
ENSMUSG00000002930	Ppp1r17	19051	protein phosphatase 1, regulatory subunit 17	chr6:56017514-56032688	+	-5.0211	0.523832	-9.58533	9.21584e-22	2.12926e-18	Yes	OK	587.066	1351.83	13.4921	170.725	1550.17	2334.6	5.16447	18.7287	15.0141	15.0613
ENSMUSG00000044244	Il20rb	213208	interleukin 20 receptor beta	chr9:100457718-100486473	-	-4.40652	0.463306	-9.51103	1.8879e-21	3.81664e-18	Yes	OK	110.616	249.53	6.43097	117.373	245.751	385.465	3.87335	8.69548	7.50705	5.64797
ENSMUSG00000004630	Pcp2	18545	Purkinje cell protein 2 (L7)	chr8:3623370-3625282	-	-5.17028	0.561501	-9.20796	3.32377e-20	5.97281e-17	Yes	OK	286.563	664.408	3.17961	53.3514	616.72	1323.15	5.81003	1.33777	3.21731	2.35332
ENSMUSG00000002100	Mybpc3	17868	myosin binding protein C, cardiac	chr2:91118143-91136516	+	-4.73883	0.519709	-9.11823	7.63598e-20	1.23497e-16	Yes	OK	190.277	436.208	5.82961	170.725	397.754	740.145	12.2656	5.35107	4.28974	1.41199
ENSMUSG00000053930	Shisa6	380702	shisa family member 6	chr11:66211724-66526126	-	-2.00684	0.236984	-8.46823	2.49142e-17	3.66307e-14	Yes	OK	797.929	1414.27	335.675	1109.71	1474.5	1658.59	280.818	394.641	287.413	379.826
ENSMUSG00000021572	Cep72	74470	centrosomal protein 72	chr13:74036494-74062285	-	-2.31921	0.276746	-8.38029	5.27977e-17	7.11582e-14	Yes	OK	187.025	352.707	62.7633	437.482	283.919	336.721	52.2903	58.1929	71.8532	68.717
ENSMUSG00000026950	Neb	17996	nebulin	chr2:52136646-52338798	-	-2.60278	0.311578	-8.35354	6.62485e-17	8.24182e-14	Yes	OK	304.21	597.685	84.1045	810.941	368.961	613.153	66.4926	86.286	81.5052	102.134
ENSMUSG00000027168	Pax6	18508	paired box 6	chr2:105675743-105698410	+	-2.36349	0.289959	-8.15109	3.60649e-16	4.16627e-13	Yes	OK	693.672	1311.33	230.43	1259.09	981.663	1693.22	298.248	245.48	219.849	158.143
ENSMUSG00000054901	Arhgef33	381112	Rho guanine nucleotide exchange factor (GEF) 33	chr17:80307406-80388689	+	-4.42963	0.551412	-8.03324	9.4932e-16	1.02356e-12	Yes	OK	905.849	2076.26	28.0396	298.768	2110.64	3819.38	33.5691	24.0798	49.3321	5.17731
ENSMUSG00000035486	Plk5	216166	polo-like kinase 5	chr10:80356458-80365489	+	-2.78546	0.375174	-7.42444	1.13258e-13	1.14483e-10	Yes	OK	251.707	507.238	60.0589	362.79	500.876	658.049	84.5682	39.4641	80.4327	35.7705
ENSMUSG00000054065	Pkp3	56460	plakophilin 3	chr7:141078228-141090510	+	-3.917	0.536582	-7.29991	2.87952e-13	2.73944e-10	Yes	OK	79.1168	178.717	4.41636	266.757	137.272	132.123	0.645559	6.68883	7.50705	2.82399
ENSMUSG00000050700	Emilin3	280635	elastin microfibril interfacer 3	chr2:160906437-160912339	-	-3.5435	0.500328	-7.08234	1.41739e-12	1.27352e-09	Yes	OK	46.9591	103.518	4.5402	117.373	79.0152	114.164	3.87335	2.67553	6.43462	5.17731
ENSMUSG00000027855	Sycp1	20957	synaptonemal complex protein 1	chr3:102818498-102936100	-	-4.18501	0.593446	-7.05205	1.76306e-12	1.50074e-09	Yes	OK	115.954	268.195	1.7731	160.054	272.535	371.996	0	6.01995	1.07244	0
ENSMUSG00000030592	Ryr1	20190	ryanodine receptor 1, skeletal muscle	chr7:29003339-29125151	-	-3.56917	0.533762	-6.68682	2.2807e-11	1.84429e-08	Yes	OK	501.931	1117.5	40.2564	2272.77	387.04	692.683	85.8593	45.4841	11.7968	17.8853
ENSMUSG00000028369	Svep1	64817	sushi, von Willebrand factor type A, EGF and pentraxin domain containing 1	chr4:58042795-58206596	-	-2.26883	0.342834	-6.61788	3.64394e-11	2.80636e-08	Yes	OK	529.269	995.474	179.616	853.623	948.182	1184.62	81.3404	234.109	216.632	186.383
ENSMUSG00000090461	Iltifb	116849	interleukin 10-related T cell-derived inducible factor beta	chr10:118289629-118295038	-	-3.88323	0.595535	-6.52057	7.00389e-11	5.14882e-08	Yes	OK	48.4067	111.627	0.991663	64.0217	111.157	159.702	1.29112	2.67553	0	0
ENSMUSG00000011034	Slc5a1	20537	solute carrier family 5 (sodium/glucose cotransporter), member 1	chr5:33104218-33162699	+	-3.40511	0.522991	-6.51084	7.47339e-11	5.25509e-08	Yes	OK	64.1878	141.444	6.24541	202.735	83.7025	137.895	2.58224	4.0133	11.7968	6.5893
ENSMUSG00000002020	Ltbp2	16997	latent transforming growth factor beta binding protein 2	chr12:84783211-84876495	-	-2.86001	0.442495	-6.46338	1.02388e-10	6.8997e-08	Yes	OK	153.772	316.87	31.4477	160.054	297.981	492.575	49.0625	33.4442	26.8109	16.4733
ENSMUSG00000024769	Cdc42bpg	240505	CDC42 binding protein kinase gamma (DMPK-like)	chr19:6306456-6325652	+	-2.25303	0.349121	-6.45345	1.09333e-10	7.07298e-08	Yes	OK	285.253	536.562	96.7717	554.855	511.59	543.243	152.997	93.6437	90.0846	50.3611
ENSMUSG00000097248	Gm2694	100040294	predicted gene 2694	chr8:87472811-87525554	+	-2.93775	0.458226	-6.41114	1.44439e-10	8.98467e-08	Yes	OK	231.788	483.837	42.7505	309.438	329.453	812.62	80.0493	32.1064	38.6077	20.2386
ENSMUSG00000001741	Il16	16170	interleukin 16	chr7:83643062-83735490	-	-3.06626	0.500542	-6.12588	9.01847e-10	5.28068e-07	Yes	OK	546.344	1167.51	80.4684	149.384	1187.24	2165.92	81.986	64.8817	68.6359	106.37
ENSMUSG00000091519	Skor2	664805	SKI family transcriptional corepressor 2	chr18:76856404-76900342	+	-3.62796	0.592445	-6.12371	9.14234e-10	5.28068e-07	Yes	OK	86.2665	197.295	2.99526	394.8	80.3544	116.73	1.93668	4.68218	5.36218	0
ENSMUSG00000102224	4930447F24Rik	76873	RIKEN cDNA 4930447F24 gene	chr9:108133717-108138567	+	-3.25187	0.535653	-6.07085	1.27233e-09	7.09564e-07	Yes	OK	41.2021	90.3312	4.35527	74.692	77.0063	119.295	7.10115	5.35107	2.14487	2.82399
ENSMUSG00000015202	Cnksr3	215748	Cnksr family member 3	chr10:7119061-7212237	-	-2.11871	0.350332	-6.04771	1.46916e-09	7.92023e-07	Yes	OK	692.203	1272.24	257.176	544.184	1389.46	1883.07	228.528	248.156	257.385	294.636
ENSMUSG00000036123	Slc9a3	105243	solute carrier family 9 (sodium/hydrogen exchanger), member 3	chr13:74121514-74166064	+	-3.07684	0.511532	-6.01495	1.79937e-09	9.38747e-07	Yes	OK	89.6368	192.822	12.2475	234.746	105.13	238.591	24.5312	10.7021	8.57949	5.17731
ENSMUSG00000053399	Adamts18	208936	a disintegrin-like and metallopeptidase (reprolysin type) with thrombospondin type 1 motif, 18	chr8:113697123-113848839	-	-3.32488	0.558217	-5.95624	2.58112e-09	1.30451e-06	Yes	OK	198.398	440.373	16.9159	448.152	366.282	506.685	35.5057	8.69548	22.5212	0.941329
ENSMUSG00000027843	Ptpn22	19260	protein tyrosine phosphatase, non-receptor type 22 (lymphoid)	chr3:103860276-103912252	+	-2.83219	0.481412	-5.88309	4.02669e-09	1.97345e-06	Yes	OK	149.217	312.259	26.9356	565.525	119.192	252.06	19.3668	40.8019	31.1006	16.4733
ENSMUSG00000005357	Slc1a6	20513	solute carrier family 1 (high affinity aspartate/glutamate transporter), member 6	chr10:78780495-78814825	+	-2.34347	0.401625	-5.83497	5.38008e-09	2.55918e-06	Yes	OK	496.375	954.407	152.851	288.098	1262.23	1312.89	173.655	121.068	153.358	163.321
ENSMUSG00000052861	Dnah6	330355	dynein, axonemal, heavy chain 6	chr6:73017606-73221631	-	-2.43119	0.426907	-5.6949	1.23447e-08	5.70429e-06	Yes	OK	250.164	492.858	68.1432	789.601	307.356	381.617	36.7969	116.386	71.8532	47.5371
ENSMUSG00000045180	Shroom2	110380	shroom family member 2	chrX:152609508-152644149	-	1.27907	0.225486	5.67249	1.40738e-08	6.32265e-06	Yes	OK	1816.91	977.892	2446.17	1003.01	1082.78	847.895	2886.29	1938.42	2280	2679.96
ENSMUSG00000031962	Cdh15	12555	cadherin 15	chr8:122848373-122867397	+	-3.00172	0.536726	-5.59265	2.23627e-08	9.7749e-06	Yes	OK	158.365	340.961	21.4186	149.384	318.07	555.429	23.8857	12.0399	45.0423	4.70664
ENSMUSG00000039384	Dusp10	63953	dual specificity phosphatase 10	chr1:184034460-184075636	+	-1.22567	0.222007	-5.52088	3.3731e-08	1.43561e-05	Yes	OK	339.68	505.051	215.651	384.13	523.643	607.38	229.819	228.758	194.111	209.916
ENSMUSG00000028347	Tmeff1	230157	transmembrane protein with EGF-like and two follistatin-like domains 1	chr4:48585192-48663131	+	1.17812	0.216537	5.44075	5.30564e-08	2.20021e-05	Yes	OK	1659.54	941.535	2198.05	885.633	960.235	978.735	2067.08	2389.25	1718.04	2617.84
ENSMUSG00000045319	Proser2	227545	proline and serine rich 2	chr2:6098499-6130185	-	-2.03645	0.376533	-5.40843	6.3581e-08	2.57074e-05	Yes	OK	159.986	294.598	59.0275	426.811	190.172	266.811	52.2903	74.9149	70.7808	38.1238
ENSMUSG00000070498	Tmem132b	208151	transmembrane protein 132B	chr5:125532417-125792583	+	1.73456	0.326367	5.31475	1.06803e-07	4.21298e-05	Yes	OK	4176.69	1646.73	6074.16	1397.81	1689.45	1852.93	6922.33	5966.44	3267.71	8140.14
ENSMUSG00000054013	Tmem179	104885	transmembrane protein 179	chr12:112500183-112511160	-	1.26029	0.238453	5.28526	1.25528e-07	4.83371e-05	Yes	OK	1383.36	762.389	1849.09	992.336	742.609	552.222	1892.78	2025.38	1709.46	1768.76
ENSMUSG00000025927	Tfap2b	21419	transcription factor AP-2 beta	chr1:19208913-19238845	+	-2.88035	0.546037	-5.27501	1.32751e-07	4.99296e-05	Yes	OK	270.513	580.579	37.963	586.866	480.787	674.083	27.1135	36.1197	85.7949	2.82399
ENSMUSG00000021948	Prkcd	18753	protein kinase C, delta	chr14:30595353-30610310	-	-1.31385	0.251829	-5.21722	1.81626e-07	6.65696e-05	Yes	OK	733.022	1124.34	439.531	832.282	1070.72	1470.03	352.475	484.94	485.814	434.894
ENSMUSG00000041261	Car8	12319	carbonic anhydrase 8	chr4:8141492-8239041	-	-2.98093	0.571763	-5.21359	1.85224e-07	6.65696e-05	Yes	OK	5724.36	12551.2	604.253	618.876	12235.3	24799.3	540.978	775.236	284.196	816.603
ENSMUSG00000031849	Comp	12845	cartilage oligomeric matrix protein	chr8:70373547-70382066	+	-2.81502	0.54533	-5.16205	2.44264e-07	8.45553e-05	Yes	OK	65.6748	140.759	9.36174	224.076	30.8025	167.398	7.74671	10.0333	10.7244	8.94263
ENSMUSG00000043873	Chil5	229687	chitinase-like 5	chr3:106016918-106032895	-	-2.96901	0.575286	-5.16093	2.45724e-07	8.45553e-05	Yes	OK	37.9009	83.1	4.00149	32.0108	57.5873	159.702	5.81003	3.34442	2.14487	4.70664
ENSMUSG00000029546	Uncx	22255	UNC homeobox	chr5:139543897-139548178	+	-3.07137	0.599386	-5.1242	2.98804e-07	0.000100678	Yes	OK	140.992	317.47	8.63343	576.195	115.175	261.039	0.645559	14.7154	18.2314	0.941329
ENSMUSG00000020788	Atp2a3	53313	ATPase, Ca++ transporting, ubiquitous	chr11:72961168-72993043	+	-2.81023	0.550078	-5.10878	3.24246e-07	0.000107021	Yes	OK	888.13	1899.71	129.444	437.482	1957.3	3304.35	178.82	183.274	141.562	14.1199
ENSMUSG00000079550	Mpp4	227157	membrane protein, palmitoylated 4 (MAGUK p55 subfamily member 4)	chr1:59120934-59163389	-	-2.83251	0.558628	-5.07048	3.96816e-07	0.000128354	Yes	OK	70.457	152.575	8.86824	320.108	54.2392	83.3785	9.68338	14.0466	7.50705	4.23598
ENSMUSG00000062542	Syt9	60510	synaptotagmin IX	chr7:107370789-107548655	+	-1.68773	0.333906	-5.05451	4.31494e-07	0.000136834	Yes	OK	374.819	634.011	180.425	480.163	622.077	799.792	123.947	215.38	259.53	122.843
ENSMUSG00000043144	Aqp6	11831	aquaporin 6	chr15:99601399-99605477	+	-3.01796	0.605379	-4.98525	6.1881e-07	0.000192462	Yes	OK	104.554	236.541	5.5638	480.163	133.254	96.206	3.22779	4.0133	15.0141	0
ENSMUSG00000028011	Tdo2	56720	tryptophan 2,3-dioxygenase	chr3:81958413-81975728	-	-2.55678	0.515512	-4.9597	7.06029e-07	0.000213047	Yes	OK	66.0677	135.686	13.8537	128.043	137.272	141.743	26.4679	11.371	12.8692	4.70664
ENSMUSG00000038963	Slco4a1	108115	solute carrier organic anion transporter family, member 4a1	chr2:180460977-180474853	+	-2.17742	0.439151	-4.95824	7.11341e-07	0.000213047	Yes	OK	119.348	226.429	39.0379	202.735	228.34	248.211	52.2903	18.7287	61.1289	24.0039
ENSMUSG00000022501	Prm1	19118	protamine 1	chr16:10796331-10796823	-	-3.03133	0.614162	-4.93572	7.9857e-07	0.000234823	Yes	OK	138.463	321.482	1.19856	96.0325	866.488	1.92412	2.58224	0.668883	1.07244	0.470664
ENSMUSG00000102758	Naaladl2	635702	N-acetylated alpha-linked acidic dipeptidase-like 2	chr3:23798102-24784006	-	-1.05798	0.216997	-4.87558	1.08491e-06	0.000313324	Yes	OK	246.697	353.793	166.375	352.119	332.132	377.127	165.263	144.479	191.966	163.791
ENSMUSG00000040380	Cbln3	56410	cerebellin 3 precursor protein	chr14:55878919-55884256	-	-2.92971	0.613985	-4.77163	1.82745e-06	0.000518514	Yes	OK	3105.23	7200.74	33.6027	245.416	7793.04	13563.8	20.0123	47.4907	62.2013	4.70664
ENSMUSG00000022372	Sla	20491	src-like adaptor	chr15:66780818-66831829	-	-1.55134	0.326649	-4.74926	2.04164e-06	0.000566949	Yes	OK	504.889	827.871	262.652	512.174	1030.55	940.894	171.719	226.083	365.701	287.105
ENSMUSG00000034522	Zfp395	380912	zinc finger protein 395	chr14:65358675-65398930	+	-1.76782	0.372436	-4.74664	2.06826e-06	0.000566949	Yes	OK	240.468	419.511	106.186	522.844	426.548	309.142	113.618	113.71	147.996	49.4198
ENSMUSG00000027583	Zbtb46	72147	zinc finger and BTB domain containing 46	chr2:181390885-181424388	-	-2.02637	0.42941	-4.71897	2.37041e-06	0.000638945	Yes	OK	442.814	817.936	161.472	373.46	951.53	1128.82	264.034	135.114	178.024	68.717
ENSMUSG00000021469	Msx2	17702	msh homeobox 2	chr13:53466880-53472780	-	-2.72345	0.579172	-4.70232	2.5722e-06	0.00068197	Yes	OK	72.8421	157.987	8.9832	266.757	77.0063	130.199	15.4934	4.0133	15.0141	1.41199
ENSMUSG00000024511	Rab27b	80718	RAB27B, member RAS oncogene family	chr18:69979130-70053588	-	0.942571	0.201176	4.6853	2.79549e-06	0.000712639	Yes	OK	1000.74	653.617	1261.08	736.249	613.372	611.229	1083.25	1453.48	1361.99	1145.6
ENSMUSG00000031147	Magix	54634	MAGI family member, X-linked	chrX:7673165-7681089	-	-2.6414	0.563879	-4.68434	2.80859e-06	0.000712639	Yes	OK	22.0081	46.9402	3.30894	53.3514	36.1595	51.3098	4.51891	2.67553	3.21731	2.82399
ENSMUSG00000041476	Smpx	66106	small muscle protein, X-linked	chrX:157698972-157752591	+	-2.87044	0.612882	-4.68351	2.82007e-06	0.000712639	Yes	OK	27.5932	62.9429	1.08089	21.3406	62.9443	104.544	2.58224	0.668883	1.07244	0
ENSMUSG00000020428	Gabra6	14399	gamma-aminobutyric acid (GABA) A receptor, subunit alpha 6	chr11:42306436-42321072	-	-2.84153	0.613155	-4.63428	3.58188e-06	0.000891227	Yes	OK	1480.5	3440.48	10.5178	85.3623	3111.06	7125.01	8.39227	19.3976	12.8692	1.41199
ENSMUSG00000084803	5830444B04Rik	641454	RIKEN cDNA 5830444B04 gene	chr4:155408308-155421704	-	-2.39685	0.518554	-4.62218	3.79732e-06	0.000930517	Yes	OK	72.7132	147.121	16.907	160.054	100.443	180.867	32.9235	17.391	10.7244	6.5893
ENSMUSG00000073542	Cep76	225659	centrosomal protein 76	chr18:67617396-67641336	-	-2.03549	0.441286	-4.61262	3.97617e-06	0.000959799	Yes	OK	876.906	1629.94	312.134	362.79	1981.41	2545.61	303.413	262.202	346.397	336.525
ENSMUSG00000061524	Zic2	22772	zinc finger protein of the cerebellum 2	chr14:122475383-122480328	+	-2.42567	0.526562	-4.60662	4.09276e-06	0.000973414	Yes	OK	742.37	1510.25	166.457	298.768	1586.33	2645.66	252.414	131.77	240.226	41.4185
ENSMUSG00000044071	Fam19a2	268354	family with sequence similarity 19, member A2	chr10:123264075-123741204	+	1.08001	0.236434	4.56791	4.92607e-06	0.00115463	Yes	OK	1077.65	639.947	1405.93	576.195	820.285	523.36	1580.33	1423.38	1188.26	1431.76
ENSMUSG00000040372	Gpr63	81006	G protein-coupled receptor 63	chr4:24973418-25009233	+	-1.91396	0.420604	-4.5505	5.35192e-06	0.00123652	Yes	OK	186.443	336.3	74.0501	202.735	287.937	518.229	126.53	68.2261	48.2596	53.1851
ENSMUSG00000026730	Pter	19212	phosphotriesterase related	chr2:12924040-13003454	+	1.39129	0.306156	4.54437	5.50985e-06	0.00125508	Yes	OK	1327.06	649.424	1835.28	576.195	749.305	622.773	2104.52	1640.77	1085.31	2510.52
ENSMUSG00000029108	Pcdh7	54216	protocadherin 7	chr5:57718080-58133235	+	1.22724	0.270814	4.53169	5.85134e-06	0.00131436	Yes	OK	3512.96	1912.77	4713.1	1515.18	2105.96	2117.17	6480.77	3960.46	4473.13	3938.05
ENSMUSG00000032446	Eomes	13813	eomesodermin	chr9:118478188-118486132	+	-2.76748	0.611217	-4.52783	5.95932e-06	0.00132028	Yes	OK	88.4385	199.83	4.89491	309.438	125.219	164.833	0.645559	17.391	1.07244	0.470664
ENSMUSG00000031343	Gabra3	14396	gamma-aminobutyric acid (GABA) A receptor, subunit alpha 3	chrX:72432675-72656246	-	1.09786	0.243635	4.50618	6.6004e-06	0.00144254	Yes	OK	1366.57	811.941	1782.54	896.304	826.311	713.207	2416.33	1557.83	1545.38	1610.61
ENSMUSG00000070720	Tmem200b	623230	transmembrane protein 200B	chr4:131921770-131923140	+	-1.79365	0.398734	-4.49836	6.848e-06	0.0014767	Yes	OK	97.2291	170.724	42.1075	149.384	146.647	216.143	63.9103	40.133	30.0282	34.3585
ENSMUSG00000024500	Ppp2r2b	72930	protein phosphatase 2, regulatory subunit B, beta	chr18:42645220-43059471	-	1.11928	0.249097	4.49336	7.01065e-06	0.00149188	Yes	OK	2032.83	1174.75	2676.4	842.952	1331.2	1350.09	2713.28	2635.4	2162.03	3194.87
ENSMUSG00000030353	Tead4	21679	TEA domain family member 4	chr6:128227142-128300813	-	-2.31667	0.517044	-4.4806	7.44333e-06	0.00156339	Yes	OK	52.2898	104.589	13.0653	117.373	94.4164	101.978	10.3289	20.0665	17.159	4.70664
ENSMUSG00000032327	Stra6	20897	stimulated by retinoic acid gene 6	chr9:58129348-58153997	+	-1.62441	0.363232	-4.47211	7.74525e-06	0.00160595	Yes	OK	170.097	284.884	84.0074	192.065	244.411	418.175	91.0238	57.524	78.2878	109.194
ENSMUSG00000059187	Fam19a1	320265	family with sequence similarity 19, member A1	chr6:96113153-96657198	+	1.36922	0.30693	4.46102	8.15692e-06	0.0016699	Yes	OK	439.515	221.236	603.224	245.416	215.618	202.674	880.542	652.161	454.713	425.481
ENSMUSG00000028262	Clca3a2	80797	chloride channel accessory 3A2	chr3:144796558-144819494	-	-2.61451	0.586961	-4.45431	8.41621e-06	0.00170144	Yes	OK	65.6598	142.076	8.3474	245.416	105.13	75.682	6.45559	6.68883	19.3039	0.941329
ENSMUSG00000056492	Adgrf5	224792	adhesion G protein-coupled receptor F5	chr17:43389465-43459557	+	0.772455	0.174166	4.43518	9.19969e-06	0.00183687	Yes	OK	845.931	599.474	1030.77	618.876	579.221	600.325	1112.94	925.066	1120.7	964.392
ENSMUSG00000014782	Plekhg4	102075	pleckstrin homology domain containing, family G (with RhoGef domain) member 4	chr8:105375380-105382862	+	-2.1926	0.495411	-4.42581	9.60811e-06	0.00189502	Yes	OK	53.4935	105.384	14.5757	170.725	56.9177	88.5095	14.2023	20.0665	11.7968	12.2373
ENSMUSG00000029862	Clcn1	12723	chloride channel, voltage-sensitive 1	chr6:42286684-42314656	+	-2.28218	0.516226	-4.42089	9.82956e-06	0.00190272	Yes	OK	92.8395	186.57	22.5416	384.13	72.319	103.261	25.8224	29.4309	16.0865	18.8266
ENSMUSG00000030873	Scnn1b	20277	sodium channel, nonvoltage-gated 1 beta	chr7:121865037-121918728	+	-2.70411	0.611828	-4.41973	9.88244e-06	0.00190272	Yes	OK	48.7472	110.18	2.67283	256.087	46.8734	27.579	4.51891	0	4.28974	1.88266
ENSMUSG00000041703	Zic5	65100	zinc finger protein of the cerebellum 5	chr14:122459159-122465658	-	-2.42207	0.548833	-4.41313	1.01886e-05	0.0019386	Yes	OK	168.466	346.72	34.7762	256.087	326.775	457.299	68.4293	23.4109	43.9699	3.29465
ENSMUSG00000063063	Ctnna2	12386	catenin (cadherin associated protein), alpha 2	chr6:76881636-77979667	-	1.09092	0.247672	4.4047	1.05932e-05	0.00199213	Yes	OK	2812.91	1657.97	3679.12	1291.1	1718.91	1963.88	4076.71	3927.68	2756.16	3955.93
ENSMUSG00000041075	Fzd7	14369	frizzled class receptor 7	chr1:59482146-59486955	+	-1.51129	0.343852	-4.39516	1.10691e-05	0.00205771	Yes	OK	474.807	774.116	250.325	458.822	676.986	1186.54	223.363	180.599	343.18	254.159
ENSMUSG00000028125	Abca4	11304	ATP-binding cassette, sub-family A (ABC1), member 4	chr3:122044459-122180061	+	-2.13671	0.487896	-4.37944	1.18986e-05	0.00217866	Yes	OK	369.19	709.226	114.164	405.471	1203.98	518.229	35.5057	80.9349	238.081	102.134
ENSMUSG00000024935	Slc1a1	20510	solute carrier family 1 (neuronal/epithelial high affinity glutamate transporter, system Xag), member 1	chr19:28835165-28913960	+	1.20073	0.274345	4.37672	1.20476e-05	0.00217866	Yes	OK	1502.85	831.846	2006.11	800.271	991.038	704.228	2128.41	2048.12	1322.31	2525.59
ENSMUSG00000049382	Krt8	16691	keratin 8	chr15:101996710-102004342	-	-2.58697	0.591261	-4.37535	1.21239e-05	0.00217866	Yes	OK	24.9495	53.9863	3.17187	64.0217	56.2481	41.6892	1.29112	2.00665	7.50705	1.88266
ENSMUSG00000047766	Lrrc49	102747	leucine rich repeat containing 49	chr9:60587223-60687534	-	0.772343	0.176965	4.36438	1.27484e-05	0.00226572	Yes	OK	1524.99	1064.87	1870.08	885.633	1141.03	1167.94	1764.96	1824.71	1945.4	1945.26
ENSMUSG00000020884	Asgr1	11889	asialoglycoprotein receptor 1	chr11:70054354-70057895	+	-2.48967	0.573495	-4.34123	1.41689e-05	0.00249079	Yes	OK	81.3998	171.738	13.6462	149.384	97.0949	268.735	30.3413	12.7088	9.65193	1.88266
ENSMUSG00000036469	March1	72925	membrane-associated ring finger (C3HC4) 1	chr8:65618524-66471637	+	1.23762	0.285977	4.32768	1.50689e-05	0.00262053	Yes	OK	1041	559.714	1401.96	490.833	695.735	492.575	1532.56	1450.81	885.832	1738.63
ENSMUSG00000040913	Fbxw4	30838	F-box and WD-40 domain protein 4	chr19:45578256-45660193	-	-1.17413	0.271491	-4.32475	1.52707e-05	0.00262738	Yes	OK	391.142	578.741	250.442	426.811	480.118	829.295	265.97	243.474	254.167	238.156
ENSMUSG00000029026	Trp73	22062	transformation related protein 73	chr4:154056248-154140208	-	-2.55027	0.590131	-4.32153	1.5495e-05	0.0026379	Yes	OK	70.9482	153.398	9.11075	309.438	61.6051	89.1509	14.2023	7.35772	13.9417	0.941329
ENSMUSG00000027070	Lrp2	14725	low density lipoprotein receptor-related protein 2	chr2:69424334-69586067	-	-2.46865	0.574097	-4.30005	1.70757e-05	0.00287672	Yes	OK	130.135	275.517	21.0979	693.568	96.4253	36.5583	16.7845	18.7287	22.5212	26.3572
ENSMUSG00000025477	Inpp5a	212111	inositol polyphosphate-5-phosphatase A	chr7:139389108-139579652	+	-1.96734	0.458699	-4.28897	1.79506e-05	0.00295839	Yes	OK	1241.63	2296.64	450.38	650.887	2639.64	3599.39	613.927	367.886	595.202	224.507
ENSMUSG00000031654	Cbln1	12404	cerebellin 1 precursor protein	chr8:87468852-87472592	-	-2.18638	0.51	-4.28701	1.81092e-05	0.00295839	Yes	OK	1762.47	3449.4	497.276	736.249	2729.37	6882.57	817.278	400.661	552.305	218.859
ENSMUSG00000023827	Agpat4	68262	1-acylglycerol-3-phosphate O-acyltransferase 4 (lysophosphatidic acid acyltransferase, delta)	chr17:12119283-12219640	+	0.777027	0.182417	4.25962	2.04778e-05	0.00331187	Yes	OK	810.586	561.09	997.708	469.492	554.445	659.332	1001.91	953.159	1025.25	1010.52
ENSMUSG00000019876	Pkib	18768	protein kinase inhibitor beta, cAMP dependent, testis specific	chr10:57645868-57741112	+	-1.76277	0.414749	-4.25021	2.13568e-05	0.00341984	Yes	OK	473.508	832.003	204.637	832.282	684.352	979.377	304.058	146.485	295.992	72.0117
ENSMUSG00000027376	Prom2	192212	prominin 2	chr2:127526952-127541417	-	-2.43388	0.574071	-4.2397	2.23823e-05	0.00354891	Yes	OK	87.7401	185.326	14.5504	437.482	72.319	46.1789	6.45559	18.0599	21.4487	12.2373
ENSMUSG00000053153	Spag16	66722	sperm associated antigen 16	chr1:69951614-70725132	+	-2.42877	0.574445	-4.22802	2.35755e-05	0.0036953	Yes	OK	70.2968	148.492	11.6502	330.779	58.257	56.4408	9.68338	13.3777	19.3039	4.23598
ENSMUSG00000030450	Oca2	18431	oculocutaneous albinism II	chr7:56239770-56536517	+	-2.44118	0.577625	-4.22624	2.37625e-05	0.0036953	Yes	OK	68.3097	144.242	11.3604	224.076	172.092	36.5583	3.87335	7.35772	25.7385	8.47196
ENSMUSG00000060445	Sycp2	320558	synaptonemal complex protein 2	chr2:178345295-178407658	-	-1.91763	0.45494	-4.21512	2.49647e-05	0.00384527	Yes	OK	89.4008	166.33	31.704	288.098	88.3899	122.502	27.1135	38.7952	24.666	36.2412
ENSMUSG00000034755	Pcdh11x	245578	protocadherin 11 X-linked	chrX:120290326-120910618	+	1.3652	0.32529	4.19686	2.70637e-05	0.00412926	Yes	OK	1827.44	900.674	2522.51	746.92	1190.58	764.517	2066.43	3398.6	1568.97	3056.02
ENSMUSG00000056025	Clca3a1	12722	chloride channel accessory 3A1	chr3:144729676-144760977	-	-2.25418	0.537563	-4.19333	2.74889e-05	0.00415494	Yes	OK	92.4229	185.137	22.887	170.725	316.061	68.6269	18.0757	7.35772	36.4628	29.6519
ENSMUSG00000021636	Marveld2	218518	MARVEL (membrane-associating) domain containing 2	chr13:100595956-100616971	-	-1.86605	0.445416	-4.18944	2.79645e-05	0.00418768	Yes	OK	74.95	134.706	30.1327	96.0325	111.827	196.26	43.898	23.4109	31.1006	22.1212
ENSMUSG00000079355	Ackr4	252837	atypical chemokine receptor 4	chr9:104098137-104126643	-	-2.2985	0.550234	-4.17732	2.94967e-05	0.0043766	Yes	OK	59.142	121.21	12.5909	234.746	44.8646	84.0199	14.8479	12.7088	17.159	5.64797
ENSMUSG00000045471	Hcrt	15171	hypocretin	chr11:100761692-100762931	-	-2.556	0.613791	-4.16428	3.12338e-05	0.00455113	Yes	OK	80.1065	183.497	2.56362	448.152	99.7734	2.56549	7.10115	0.668883	1.07244	1.41199
ENSMUSG00000085555	2610035F20Rik	69248	RIKEN cDNA 2610035F20 gene	chr14:122470376-122475199	-	-2.30814	0.554272	-4.16426	3.12357e-05	0.00455113	Yes	OK	63.7107	130.205	13.8398	170.725	73.6582	146.233	18.7212	16.0532	18.2314	2.35332
ENSMUSG00000026875	Traf1	22029	TNF receptor-associated factor 1	chr2:34941749-34961772	-	-2.26094	0.543654	-4.15879	3.19943e-05	0.00462003	Yes	OK	103.796	210.546	23.7337	458.822	67.6316	105.185	16.139	33.4442	32.1731	13.1786
ENSMUSG00000026655	Fam107b	66540	family with sequence similarity 107, member B	chr2:3713457-3782134	+	-1.97295	0.474688	-4.15631	3.23436e-05	0.00462914	Yes	OK	1099.44	2047.84	388.145	480.163	2022.92	3640.43	416.386	387.283	551.232	197.679
ENSMUSG00000052852	Reep1	52250	receptor accessory protein 1	chr6:71707680-71810705	+	0.857212	0.207716	4.12685	3.67769e-05	0.00521748	Yes	OK	2500.13	1676.98	3117.5	1408.48	1976.05	1646.4	2865.64	2927.7	3617.33	3059.32
ENSMUSG00000003573	Homer3	26558	homer scaffolding protein 3	chr8:70282998-70294361	+	-2.15169	0.523689	-4.10872	3.97865e-05	0.00559536	Yes	OK	698.298	1368.5	195.649	128.043	1527.4	2450.05	120.074	199.327	173.735	289.459
ENSMUSG00000040434	Large2	228366	LARGE xylosyl- and glucuronyltransferase 2	chr2:92365045-92371057	-	-2.4551	0.600023	-4.09167	4.28275e-05	0.00596677	Yes	OK	48.1758	104.964	5.58469	256.087	40.8468	17.9584	3.22779	6.68883	5.36218	7.05997
ENSMUSG00000050967	Creg2	263764	cellular repressor of E1A-stimulated genes 2	chr1:39618405-39651182	-	1.6831	0.41153	4.08985	4.31653e-05	0.00596677	Yes	OK	1763.79	678.538	2577.73	885.633	516.947	633.035	5103.14	2069.53	1677.29	1460.94
ENSMUSG00000032021	Crtam	54698	cytotoxic and regulatory T cell molecule	chr9:40972797-41004628	-	-2.49878	0.611483	-4.08643	4.38066e-05	0.0060041	Yes	OK	390.199	900.463	7.50107	288.098	877.202	1536.09	3.87335	4.68218	21.4487	0
ENSMUSG00000059049	Frem1	329872	Fras1 related extracellular matrix protein 1	chr4:82897919-83052167	-	-1.79796	0.44066	-4.08016	4.50048e-05	0.00606683	Yes	OK	199.097	354.643	82.4373	341.449	387.04	335.438	97.4794	44.8152	151.214	36.2412
ENSMUSG00000020519	Sap30l	50724	SAP30-like	chr11:57801636-57810615	+	0.750829	0.184022	4.08011	4.50145e-05	0.00606683	Yes	OK	403.996	283.656	494.251	256.087	296.642	298.238	476.423	452.834	520.132	527.615
ENSMUSG00000049612	Omg	18377	oligodendrocyte myelin glycoprotein	chr11:79500981-79504082	-	1.09719	0.271425	4.04235	5.29186e-05	0.00701658	Yes	OK	2287.65	1333.09	3003.57	917.644	1592.36	1489.27	2929.55	2779.88	2454.81	3850.04
ENSMUSG00000021848	Otx2	18424	orthodenticle homeobox 2	chr14:48657676-48665109	-	-2.41919	0.59847	-4.0423	5.29291e-05	0.00701658	Yes	OK	163.696	351.595	22.7721	128.043	439.94	486.802	1.93668	8.69548	72.9257	7.53063
ENSMUSG00000032246	Calml4	75600	calmodulin-like 4	chr9:62858103-62875917	+	-2.21283	0.549496	-4.02703	5.6487e-05	0.00742735	Yes	OK	87.2551	175.172	21.3172	202.735	110.487	212.294	11.6201	16.0532	51.4769	6.11864
ENSMUSG00000020096	Tbata	65971	thymus, brain and testes associated	chr10:61175261-61180680	+	-2.46411	0.612993	-4.0198	5.82475e-05	0.00751416	Yes	OK	57.2819	127.962	4.27151	224.076	48.2127	111.599	12.2656	2.67553	2.14487	0
ENSMUSG00000018678	Sp2	78912	Sp2 transcription factor	chr11:96953337-96977688	-	-1.08891	0.270938	-4.01905	5.8433e-05	0.00751416	Yes	OK	191.743	283.597	122.852	362.79	256.465	231.536	142.669	125.081	120.113	103.546
ENSMUSG00000041025	Iffo2	212632	intermediate filament family orphan 2	chr4:139530547-139620382	+	-0.812636	0.202253	-4.01792	5.87147e-05	0.00751416	Yes	OK	979.876	1305.16	735.914	1163.06	1405.53	1346.88	819.214	612.697	673.49	838.253
ENSMUSG00000055214	Pld5	319455	phospholipase D family, member 5	chr1:175962305-176213942	-	-2.08492	0.519057	-4.01675	5.90057e-05	0.00751416	Yes	OK	460.496	891.485	137.255	725.579	921.397	1027.48	50.9992	112.372	351.759	33.8878
ENSMUSG00000041886	Macc1	238455	metastasis associated in colon cancer 1	chr12:119443409-119466932	+	-2.4624	0.614229	-4.00892	6.0996e-05	0.00770693	Yes	OK	90.1435	203.91	4.81826	544.184	65.6228	1.92412	5.81003	6.68883	5.36218	1.41199
ENSMUSG00000039813	Tbc1d2	381605	TBC1 domain family, member 2	chr4:46604389-46650199	-	-1.65831	0.415227	-3.99374	6.50384e-05	0.008154	Yes	OK	106.166	185.218	46.878	288.098	139.281	128.275	62.6192	38.7952	53.6218	32.4758
ENSMUSG00000057098	Ebf1	13591	early B cell factor 1	chr11:44618099-45008096	+	-1.83657	0.460327	-3.98972	6.61527e-05	0.0082299	Yes	OK	679.8	1229.36	267.633	1003.01	1435.67	1249.39	80.0493	333.104	514.769	142.611
ENSMUSG00000063239	Grm4	268934	glutamate receptor, metabotropic 4	chr17:27422387-27503533	-	-2.11742	0.533037	-3.97238	7.11589e-05	0.00878514	Yes	OK	1653.84	3244.12	461.138	736.249	2878.7	6117.42	942.516	241.467	506.19	154.378
ENSMUSG00000030351	Tspan11	68498	tetraspanin 11	chr6:127887621-127953031	+	-1.85604	0.470483	-3.94497	7.98106e-05	0.00966943	Yes	OK	151.848	275.548	59.0721	138.714	237.046	450.885	100.062	69.5639	33.2455	33.4172
ENSMUSG00000025983	Ccdc150	78016	coiled-coil domain containing 150	chr1:54250682-54368727	+	-2.4183	0.613424	-3.9423	8.07036e-05	0.00966943	Yes	OK	58.8374	131.574	4.28531	352.119	36.8291	5.77236	3.87335	7.35772	2.14487	3.76532
ENSMUSG00000043036	Ccdc63	330188	coiled-coil domain containing 63	chr5:122108051-122134893	-	-2.35805	0.598335	-3.94102	8.1137e-05	0.00966943	Yes	OK	58.7199	126.064	8.21196	266.757	56.9177	54.5167	6.45559	9.36437	16.0865	0.941329
ENSMUSG00000033581	Igf2bp2	319765	insulin-like growth factor 2 mRNA binding protein 2	chr16:22059008-22163299	-	-2.22338	0.564239	-3.9405	8.1311e-05	0.00966943	Yes	OK	135.387	276.19	29.7846	522.844	283.919	21.8067	23.8857	31.4375	40.7526	23.0626
ENSMUSG00000040146	Rgl3	71746	ral guanine nucleotide dissociation stimulator-like 3	chr9:21971526-21989453	-	-1.68379	0.428758	-3.92714	8.59613e-05	0.0101478	Yes	OK	215.249	376.254	94.4948	544.184	219.635	364.941	56.8092	141.803	50.4045	128.962
ENSMUSG00000066438	Plekhd1	217682	pleckstrin homology domain containing, family D (with coiled-coil domains) member 1	chr12:80692600-80724216	+	-2.05753	0.524165	-3.92534	8.66067e-05	0.0101499	Yes	OK	336.543	649.525	101.807	181.395	780.107	987.073	34.8602	92.9748	229.501	49.8904
ENSMUSG00000053469	Tg	21819	thyroglobulin	chr15:66670769-66850720	+	-2.34243	0.597411	-3.92098	8.81904e-05	0.0102612	Yes	OK	33.7654	72.559	4.67031	149.384	52.9	15.393	3.87335	6.01995	6.43462	2.35332
ENSMUSG00000033498	Strc	140476	stereocilin	chr2:121363726-121380940	-	-2.38968	0.609864	-3.91838	8.91444e-05	0.0102981	Yes	OK	67.9016	156.751	1.26489	426.811	41.5164	1.92412	2.58224	2.00665	0	0.470664
ENSMUSG00000025207	Sema4g	26456	sema domain, immunoglobulin domain (Ig), transmembrane domain (TM) and short cytoplasmic domain, (semaphorin) 4G	chr19:44989343-45003395	+	-0.970656	0.248347	-3.90846	9.28853e-05	0.0106541	Yes	OK	536.758	749.425	377.258	565.525	846.4	836.35	457.056	400.661	284.196	367.118
ENSMUSG00000020640	Itsn2	20403	intersectin 2	chr12:4593007-4713952	+	0.758388	0.194127	3.90666	9.3579e-05	0.0106581	Yes	OK	1861.06	1307.71	2276.08	1024.35	1469.82	1428.98	2345.96	2381.22	2182.41	2194.71
ENSMUSG00000044976	Wdr72	546144	WD repeat domain 72	chr9:74110333-74283203	+	-2.36704	0.609165	-3.88571	0.000102033	0.0115159	Yes	OK	62.6157	136.956	6.86034	256.087	81.024	73.7579	0.645559	8.69548	17.159	0.941329
ENSMUSG00000037977	6430571L13Rik	235599	RIKEN cDNA 6430571L13 gene	chr9:107340639-107349683	+	-1.60368	0.412839	-3.88451	0.000102535	0.0115159	Yes	OK	233.809	395.065	112.868	234.746	393.737	556.712	108.454	97.657	189.821	55.5384
ENSMUSG00000058672	Tubb2a	22151	tubulin, beta 2A class IIA	chr13:34074279-34078008	-	1.04177	0.268603	3.87849	0.000105107	0.0116886	Yes	OK	3682.01	2226.21	4773.86	1974	2375.81	2328.83	4067.02	3743.74	4573.94	6710.73
ENSMUSG00000052415	Tchh	99681	trichohyalin	chr3:93442329-93449077	+	1.66815	0.43026	3.87707	0.000105721	0.0116886	Yes	OK	71.5594	24.0392	107.2	10.6703	27.4544	33.9928	126.53	90.2993	116.896	95.0742
ENSMUSG00000038766	Gabpb2	213054	GA repeat binding protein, beta 2	chr3:95181765-95217942	-	-0.957684	0.247088	-3.87588	0.000106241	0.0116886	Yes	OK	751.54	1049.1	528.373	906.974	1033.89	1206.42	534.523	703.665	449.351	425.951
ENSMUSG00000024857	Cabp2	29866	calcium binding protein 2	chr19:4083518-4087339	+	-2.36746	0.612017	-3.86829	0.000109603	0.0119705	Yes	OK	13.8844	31.8242	0.429499	53.3514	25.4456	16.6757	0.645559	0	1.07244	0
ENSMUSG00000039519	Cyp7b1	13123	cytochrome P450, family 7, subfamily b, polypeptide 1	chr3:18071949-18243338	-	0.903117	0.233558	3.86678	0.000110283	0.0119705	Yes	OK	342.85	222.191	433.345	202.735	231.019	232.818	446.727	527.749	409.671	349.233
ENSMUSG00000019737	Syne4	233066	spectrin repeat containing, nuclear envelope family member 4	chr7:30314815-30319045	+	-2.01163	0.521847	-3.85482	0.000115816	0.0124873	Yes	OK	59.7633	116.038	17.5571	202.735	70.9797	74.3993	9.03783	28.762	15.0141	17.4146
ENSMUSG00000040663	Clcf1	56708	cardiotrophin-like cytokine factor 1	chr19:4214388-4223505	+	-2.27767	0.591866	-3.84829	0.000118946	0.0127398	Yes	OK	78.9911	166.899	13.0603	394.8	77.6759	28.2204	15.4934	4.68218	23.5936	8.47196
ENSMUSG00000032313	Tmem266	244886	transmembrane protein 266	chr9:55326948-55438344	+	-1.49269	0.388431	-3.84286	0.000121608	0.0128953	Yes	OK	226.148	369.583	118.572	170.725	312.043	625.98	140.732	114.379	91.1571	128.021
ENSMUSG00000036478	Btg1	12226	B cell translocation gene 1, anti-proliferative	chr10:96617000-96622811	+	-1.22852	0.319753	-3.84209	0.000121992	0.0128953	Yes	OK	839.268	1272.62	514.257	682.898	1305.76	1829.2	639.103	500.325	491.176	426.422
ENSMUSG00000040093	Bmf	171543	BCL2 modifying factor	chr2:118528756-118547599	-	-0.974716	0.25392	-3.83867	0.0001237	0.012908	Yes	OK	248.605	350.301	172.334	352.119	403.111	295.673	140.732	199.996	156.576	192.031
ENSMUSG00000058571	Gpc6	23888	glypican 6	chr14:116925296-117979529	+	-0.89469	0.233135	-3.83765	0.000124215	0.012908	Yes	OK	470.525	646.158	338.801	650.887	753.323	534.264	312.451	422.734	293.848	326.17
ENSMUSG00000067860	Zic3	22773	zinc finger protein of the cerebellum 3	chrX:58030627-58036630	+	-1.44682	0.377064	-3.83708	0.000124507	0.012908	Yes	OK	149.006	243.84	77.8811	298.768	193.52	239.232	40.0247	96.9881	76.143	98.3689
ENSMUSG00000033453	Adamts15	235130	a disintegrin-like and metallopeptidase (reprolysin type) with thrombospondin type 1 motif, 15	chr9:30899154-30922452	-	-1.49601	0.390087	-3.83506	0.000125535	0.0129317	Yes	OK	281.693	464.285	144.749	416.141	438.601	538.112	273.717	94.3126	93.3019	117.666
ENSMUSG00000022112	Gpc5	103978	glypican 5	chr14:115092214-116525192	+	1.45348	0.37947	3.8303	0.000127986	0.0131008	Yes	OK	1353.05	617.076	1905.02	650.887	616.051	584.291	1063.24	2227.38	1103.54	3225.93
ENSMUSG00000048450	Msx1	17701	msh homeobox 1	chr5:37820490-37824585	-	-1.74635	0.457167	-3.81995	0.00013348	0.0135772	Yes	OK	147.465	263.249	60.6275	373.46	168.075	248.211	91.6694	51.504	77.2154	22.1212
ENSMUSG00000039004	Bmp6	12161	bone morphogenetic protein 6	chr13:38345715-38500314	+	-1.67839	0.439755	-3.81665	0.000135278	0.0136741	Yes	OK	238.796	415.245	106.459	394.8	360.925	490.009	102.644	91.637	196.256	35.2998
ENSMUSG00000014158	Trpv4	63873	transient receptor potential cation channel, subfamily V, member 4	chr5:114622153-114658421	-	-1.66534	0.437031	-3.81057	0.000138647	0.0139276	Yes	OK	137.174	237.978	61.5702	256.087	241.063	216.784	27.1135	69.5639	107.244	42.3598
ENSMUSG00000021541	Trpc7	26946	transient receptor potential cation channel, subfamily C, member 7	chr13:56773097-56895789	-	-2.00882	0.527968	-3.80482	0.000141909	0.0141672	Yes	OK	98.5137	190.522	29.5077	320.108	122.54	128.916	34.2146	27.4242	49.3321	7.05997
ENSMUSG00000032194	Kank2	235041	KN motif and ankyrin repeat domains 2	chr9:21766772-21798546	-	-1.72485	0.453848	-3.8005	0.000144406	0.0143263	Yes	OK	819.978	1447.05	349.671	810.941	1325.18	2205.04	419.613	425.41	463.292	90.3676
ENSMUSG00000021662	Arhgef28	110596	Rho guanine nucleotide exchange factor (GEF) 28	chr13:97898594-98206165	-	0.831715	0.218929	3.79901	0.000145274	0.0143263	Yes	OK	684.575	473.632	842.782	544.184	485.475	391.238	939.288	931.086	810.762	689.994
ENSMUSG00000021943	Gdf10	14560	growth differentiation factor 10	chr14:33923586-33936514	+	-2.31176	0.609542	-3.79261	0.000149072	0.0144806	Yes	OK	425.286	924.719	50.712	181.395	1391.47	1201.29	109.099	20.0665	67.5635	6.11864
ENSMUSG00000097589	Dleu2	668253	deleted in lymphocytic leukemia, 2	chr14:61602835-61682373	-	-1.00031	0.263758	-3.79254	0.000149116	0.0144806	Yes	OK	389.819	559.454	262.594	725.579	479.448	473.333	305.349	291.633	189.821	263.572
ENSMUSG00000003051	Elf3	13710	E74-like factor 3	chr1:135253573-135258472	-	-2.32887	0.614178	-3.79186	0.000149525	0.0144806	Yes	OK	23.2115	52.4053	1.31622	128.043	7.36582	21.8067	2.58224	0.668883	1.07244	0.941329
ENSMUSG00000049583	Grm5	108071	glutamate receptor, metabotropic 5	chr7:87584167-88135063	+	1.20798	0.319152	3.78497	0.000153724	0.0147111	Yes	OK	5245.88	2851.14	7041.94	2635.56	3479.35	2438.5	8793.16	7623.93	3958.36	7792.32
ENSMUSG00000020024	Cep83	77048	centrosomal protein 83	chr10:94688789-94790336	+	0.622048	0.164517	3.78105	0.000156169	0.0148043	Yes	OK	637.342	479.166	755.974	437.482	474.091	525.926	790.81	752.494	722.822	757.77
ENSMUSG00000036446	Lum	17022	lumican	chr10:97565500-97572703	+	-1.93236	0.511142	-3.78048	0.000156528	0.0148043	Yes	OK	155.438	292.616	52.5551	330.779	166.735	380.334	54.8725	57.524	87.9398	9.88395
ENSMUSG00000045613	Chrm2	243764	cholinergic receptor, muscarinic 2, cardiac	chr6:36388083-36524774	+	1.42229	0.376861	3.77405	0.000160618	0.0150657	Yes	OK	713.218	334.351	997.368	394.8	324.766	283.487	1285.95	840.786	1442.43	420.303
ENSMUSG00000026603	Smyd2	226830	SET and MYND domain containing 2	chr1:189880491-189922288	-	0.929199	0.246262	3.77322	0.000161156	0.0150657	Yes	OK	1070.31	679.851	1363.16	469.492	790.152	779.91	1207.84	1185.26	1453.15	1606.38
ENSMUSG00000024172	St6gal2	240119	beta galactoside alpha 2,6 sialyltransferase 2	chr17:55445716-55499226	+	1.55485	0.412557	3.76881	0.000164026	0.015246	Yes	OK	975.595	409.745	1399.98	533.514	360.925	334.797	1269.17	1102.32	594.13	2634.31
ENSMUSG00000054889	Dsp	109620	desmoplakin	chr13:38151293-38198577	+	-2.05587	0.547192	-3.75713	0.000171876	0.0158843	Yes	OK	112.731	221.185	31.39	277.427	243.742	142.385	21.3034	26.7553	71.8532	5.64797
ENSMUSG00000020846	Rflnb	76566	refilin B	chr11:76019194-76027782	-	-0.89618	0.238883	-3.75154	0.000175754	0.0161504	Yes	OK	573.384	785.222	414.505	704.239	833.677	817.751	291.793	421.397	448.278	496.551
ENSMUSG00000060794	Tssk5	73542	testis-specific serine kinase 5	chr15:76371957-76374938	-	-2.29208	0.614199	-3.73182	0.000190102	0.0173702	Yes	OK	15.9556	35.4972	1.29944	32.0108	47.543	26.9377	2.58224	0	2.14487	0.470664
ENSMUSG00000038677	Scube3	268935	signal peptide, CUB domain, EGF-like 3	chr17:28142525-28171345	+	-1.57369	0.422248	-3.72692	0.000193833	0.0175132	Yes	OK	174.566	298.349	81.7293	480.163	256.465	158.419	81.3404	76.2527	122.258	47.0664
ENSMUSG00000038859	Baiap2l1	66898	BAI1-associated protein 2-like 1	chr5:144264524-144358112	-	-2.0592	0.553555	-3.71996	0.000199254	0.017903	Yes	OK	56.3578	111.092	15.307	128.043	91.0683	114.164	14.2023	17.391	26.8109	2.82399
ENSMUSG00000051537	Gm5124	331392	nucleolar and coiled-body phosphoprotein 1 pseudogene	chrX:21360864-21364624	+	0.79377	0.213486	3.71814	0.000200697	0.017933	Yes	OK	342.289	230.602	426.054	181.395	240.394	270.018	423.487	387.952	472.944	419.833
ENSMUSG00000058620	Adra2b	11552	adrenergic receptor, alpha 2b	chr2:127363285-127367221	+	-2.2717	0.611742	-3.71349	0.000204421	0.0181654	Yes	OK	21.69	47.6325	2.2331	96.0325	31.4721	15.393	1.29112	1.33777	5.36218	0.941329
ENSMUSG00000054263	Lifr	16880	leukemia inhibitory factor receptor	chr15:7140541-7197489	+	1.02443	0.27625	3.70834	0.000208624	0.0182175	Yes	OK	3430.88	2086.63	4439.08	1643.22	2266.66	2349.99	3367.24	5851.39	4830.25	3707.42
ENSMUSG00000074024	4632427E13Rik	666737	RIKEN cDNA 4632427E13 gene	chr7:92740705-92741459	-	-1.02345	0.276029	-3.70776	0.000209101	0.0182175	Yes	OK	336.059	480.957	227.386	469.492	511.59	461.789	189.149	311.7	163.01	245.687
ENSMUSG00000042607	Asb4	65255	ankyrin repeat and SOCS box-containing 4	chr6:5383385-5433021	+	-2.00913	0.541894	-3.7076	0.000209232	0.0182175	Yes	OK	97.4559	188.875	28.892	192.065	304.008	70.551	13.5567	24.7487	62.2013	15.0613
ENSMUSG00000036972	Zic4	22774	zinc finger protein of the cerebellum 4	chr9:91368971-91389348	+	-2.08678	0.562889	-3.70726	0.000209513	0.0182175	Yes	OK	272.865	543.545	69.8555	416.141	434.583	779.91	82.6316	69.5639	124.403	2.82399
ENSMUSG00000034765	Dusp5	240672	dual specificity phosphatase 5	chr19:53529317-53541322	+	-1.59067	0.430208	-3.69745	0.00021778	0.0188351	Yes	OK	308.939	523.662	147.897	160.054	712.476	698.455	180.757	103.008	104.026	203.798
ENSMUSG00000027208	Fgf7	14178	fibroblast growth factor 7	chr2:126034657-126091185	+	-2.1738	0.588385	-3.69452	0.000220304	0.018952	Yes	OK	62.4077	129.024	12.4457	138.714	64.2835	184.074	22.5946	13.3777	12.8692	0.941329
ENSMUSG00000051043	Gprc5c	70355	G protein-coupled receptor, family C, group 5, member C	chr11:114852029-114869096	+	-2.09941	0.571273	-3.67497	0.000237881	0.0203558	Yes	OK	293.47	589.816	71.2098	330.779	594.623	844.047	134.922	78.9282	68.6359	2.35332
ENSMUSG00000072845	Tmprss11a	194597	transmembrane protease, serine 11a	chr5:86410409-86468990	-	-2.24418	0.611803	-3.66814	0.000244325	0.0207972	Yes	OK	58.1322	132.052	2.69204	298.768	73.6582	23.7308	0.645559	0	9.65193	0.470664
ENSMUSG00000031841	Cdh13	12554	cadherin 13	chr8:118283610-119324927	+	1.10618	0.30201	3.66273	0.000249538	0.0211297	Yes	OK	1302.35	756.337	1711.86	800.271	820.954	647.787	1380.21	1673.55	1194.69	2599.01
ENSMUSG00000032988	Slc16a8	57274	solute carrier family 16 (monocarboxylic acid transporters), member 8	chr15:79251015-79254748	-	-1.98673	0.543976	-3.65224	0.000259963	0.0218003	Yes	OK	51.9605	100.618	15.4678	117.373	131.246	53.234	9.03783	9.36437	32.1731	11.2959
ENSMUSG00000044912	Syt16	238266	synaptotagmin XVI	chr12:73997760-74267916	+	1.51173	0.413939	3.65205	0.000260153	0.0218003	Yes	OK	1373.84	585.82	1964.86	522.844	774.751	459.864	3208.43	1563.85	728.184	2358.97
ENSMUSG00000052539	Magi3	99470	membrane associated guanylate kinase, WW and PDZ domain containing 3	chr3:104013264-104220406	-	0.862284	0.236501	3.646	0.000266356	0.0221174	Yes	OK	1172.26	783.431	1463.88	746.92	819.615	783.758	1968.95	1327.06	1363.07	1196.43
ENSMUSG00000027381	Bcl2l11	12125	BCL2-like 11 (apoptosis facilitator)	chr2:128127574-128131498	+	-1.38142	0.37892	-3.64569	0.000266672	0.0221174	Yes	OK	350.533	566.642	188.452	981.666	423.87	294.39	225.946	145.817	214.487	167.557
ENSMUSG00000031788	Kifc3	16582	kinesin family member C3	chr8:95099827-95142540	-	0.837264	0.22989	3.64202	0.000270505	0.0223103	Yes	OK	1017.71	686.003	1266.5	597.536	746.626	713.848	1083.89	1583.92	1044.55	1353.63
ENSMUSG00000052581	Lrrtm4	243499	leucine rich repeat transmembrane neuronal 4	chr6:80018876-80810143	+	1.21437	0.33386	3.63736	0.000275451	0.022441	Yes	OK	717.723	389.37	963.987	437.482	397.754	332.873	958.655	1030.08	485.814	1381.4
ENSMUSG00000025272	Tro	56191	trophinin	chrX:150644709-150657436	-	0.820282	0.225555	3.63673	0.000276124	0.022441	Yes	OK	3462.21	2366.07	4284.31	1995.34	2708.61	2394.25	5294.87	4025.34	3736.37	4080.66
ENSMUSG00000068923	Syt11	229521	synaptotagmin XI	chr3:88744700-88772599	-	0.912761	0.251081	3.63533	0.000277625	0.0224502	Yes	OK	13572.6	8828.46	17130.8	7106.41	8435.87	10943.1	20005.9	16356.9	15371.2	16789.1
ENSMUSG00000101268	2010310C07Rik	72131	RIKEN cDNA 2010310C07 gene	chr6:42370670-42380558	+	-2.22368	0.611917	-3.63396	0.000279103	0.0224574	Yes	OK	17.6318	40.1659	0.731164	96.0325	17.4101	7.0551	0.645559	1.33777	0	0.941329
ENSMUSG00000022332	Khdrbs3	13992	KH domain containing, RNA binding, signal transduction associated 3	chr15:68928419-69093518	+	1.46307	0.403033	3.63014	0.000283263	0.022591	Yes	OK	1737.03	770.697	2461.79	640.217	847.069	824.806	4628.01	1969.19	1089.6	2160.35
ENSMUSG00000034452	Slc24a1	214111	solute carrier family 24 (sodium/potassium/calcium exchanger), member 1	chr9:64922860-64951607	-	-2.19616	0.605023	-3.62988	0.000283558	0.022591	Yes	OK	55.2356	118.35	7.90019	309.438	32.1418	13.4688	6.45559	8.69548	7.50705	8.94263
ENSMUSG00000071226	Cecr2	330409	cat eye syndrome chromosome region, candidate 2	chr6:120666420-120771191	+	-1.49435	0.411863	-3.62827	0.000285322	0.0226202	Yes	OK	319.537	533.15	159.328	832.282	366.952	400.217	267.261	151.168	142.634	76.2476
ENSMUSG00000049630	C1ql3	227580	C1q-like 3	chr2:13001886-13010864	-	1.35689	0.374248	3.62564	0.000288247	0.0227406	Yes	OK	948.87	467.863	1309.63	682.898	329.453	391.238	1908.27	1090.95	664.91	1574.37
ENSMUSG00000029657	Hsph1	15505	heat shock 105kDa/110kDa protein 1	chr5:149616844-149636315	-	0.898686	0.248059	3.62287	0.000291354	0.0228741	Yes	OK	3795.1	2488.76	4774.85	2390.14	1968.68	3107.45	5646.06	4998.57	4102.07	4352.71
ENSMUSG00000015709	Arnt2	11864	aryl hydrocarbon receptor nuclear translocator 2	chr7:84246274-84410038	-	1.06538	0.294447	3.61824	0.000296612	0.0231744	Yes	OK	5914.81	3510.44	7718.09	3158.4	4159.01	3213.92	7510.43	6823.28	5555.22	10983.4
ENSMUSG00000041930	Fam222a	433940	family with sequence similarity 222, member A	chr5:114568250-114613218	+	-1.14786	0.317468	-3.61568	0.000299564	0.0232926	Yes	OK	222.855	338.237	136.319	512.174	220.975	281.563	127.821	149.161	123.33	144.965
ENSMUSG00000063430	Wscd2	320916	WSC domain containing 2	chr5:113550419-113589725	+	-1.94782	0.539684	-3.60919	0.000307156	0.0237084	Yes	OK	1127.08	2161.93	350.951	1184.4	1743.69	3557.7	854.72	181.936	312.079	55.0677
ENSMUSG00000029371	Cxcl5	20311	chemokine (C-X-C motif) ligand 5	chr5:90759297-90761625	+	-2.21404	0.613544	-3.60861	0.000307845	0.0237084	Yes	OK	57.3997	125.798	6.10062	117.373	234.367	25.6549	17.4301	0.668883	5.36218	0.941329
ENSMUSG00000057457	Phex	18675	phosphate regulating endopeptidase homolog, X-linked	chrX:157162074-157415286	-	-1.86058	0.515954	-3.60609	0.00031084	0.0238257	Yes	OK	65.6175	124.304	21.6022	245.416	57.5873	69.9097	22.5946	22.0732	25.7385	16.0026
ENSMUSG00000036523	Greb1	268527	gene regulated by estrogen in breast cancer protein	chr12:16670614-16800886	-	-1.9389	0.538766	-3.59877	0.000319723	0.024391	Yes	OK	122.713	236.945	37.0383	522.844	77.6759	110.316	47.7714	36.1197	48.2596	16.0026
ENSMUSG00000016024	Lbp	16803	lipopolysaccharide binding protein	chr2:158306492-158332852	+	-1.89011	0.526833	-3.58768	0.000333629	0.025214	Yes	OK	224.591	422.05	76.4957	213.406	674.977	377.769	81.3404	41.4708	166.228	16.9439
ENSMUSG00000039131	Gipc2	54120	GIPC PDZ domain containing family, member 2	chr3:152093840-152165900	-	-2.06132	0.575566	-3.58138	0.00034178	0.0254687	Yes	OK	65.2467	131.857	15.2887	256.087	52.9	86.5854	12.9112	13.3777	31.1006	3.76532
ENSMUSG00000074715	Ccl28	56838	chemokine (C-C motif) ligand 28	chr13:119623818-119654358	+	-2.12434	0.593354	-3.58022	0.000343299	0.0254687	Yes	OK	51.6746	107.737	9.62742	234.746	74.9975	13.4688	12.9112	11.371	8.57949	5.64797
ENSMUSG00000023120	Gm853	332942	predicted gene 853	chr4:130209108-130222295	-	-2.16338	0.605183	-3.57475	0.000350562	0.0258888	Yes	OK	12.4781	28.7582	0.268109	42.6811	14.7316	28.8618	0	0	1.07244	0
ENSMUSG00000052131	Akr1b7	11997	aldo-keto reductase family 1, member B7	chr6:34412361-34423137	+	-2.18501	0.611501	-3.57319	0.000352664	0.0259256	Yes	OK	21.7998	49.3716	1.12099	64.0217	32.1418	51.9512	0	4.0133	0	0.470664
ENSMUSG00000031937	Vstm5	69137	V-set and transmembrane domain containing 5	chr9:15239044-15259413	+	1.26643	0.354617	3.57127	0.000355253	0.0259978	Yes	OK	143.985	79.0348	192.698	106.703	65.6228	64.7787	161.39	216.049	253.095	140.258
ENSMUSG00000036339	Tmem260	218989	transmembrane protein 260	chr14:48446351-48515130	+	-0.933584	0.261638	-3.56823	0.000359396	0.02608	Yes	OK	527.767	743.532	365.943	1056.36	559.802	614.435	400.247	389.29	329.238	344.997
ENSMUSG00000037161	Mgarp	67749	mitochondria localized glutamic acid rich protein	chr3:51388412-51396547	-	-2.16525	0.606839	-3.56808	0.000359601	0.02608	Yes	OK	23.7518	50.5374	3.66259	64.0217	54.2392	33.3514	0.645559	4.0133	8.57949	1.41199
ENSMUSG00000044548	Dact1	59036	dishevelled-binding antagonist of beta-catenin 1	chr12:71309883-71320107	+	-1.32685	0.372036	-3.56645	0.00036185	0.0261259	Yes	OK	487.836	769.166	276.84	672.228	861.132	774.137	233.692	274.911	127.62	471.135
ENSMUSG00000048232	Fbxo10	269529	F-box protein 10	chr4:45034247-45084604	-	0.672354	0.188928	3.55879	0.000372563	0.0267798	Yes	OK	679.95	507.905	808.983	544.184	490.162	489.368	917.339	756.507	700.301	861.787
ENSMUSG00000027360	Hdc	15186	histidine decarboxylase	chr2:126593659-126618678	-	-1.96349	0.552302	-3.55509	0.000377844	0.0270393	Yes	OK	133.908	261.134	38.488	522.844	140.62	119.937	31.6324	46.153	68.6359	7.53063
ENSMUSG00000032561	Acpp	56318	acid phosphatase, prostate	chr9:104298999-104337722	-	-2.10529	0.592399	-3.55383	0.000379661	0.0270496	Yes	OK	80.9326	167.884	15.7193	426.811	27.4544	49.3857	12.9112	8.69548	25.7385	15.5319
ENSMUSG00000084128	Esrp2	77411	epithelial splicing regulatory protein 2	chr8:106131182-106136974	-	-2.1519	0.606751	-3.5466	0.000390233	0.0276762	Yes	OK	32.1675	69.097	4.47031	170.725	15.4013	21.1653	3.87335	5.35107	5.36218	3.29465
ENSMUSG00000043925	Olfr544	257926	olfactory receptor 544	chr7:102484113-102488307	-	-2.17688	0.613984	-3.54549	0.000391878	0.0276762	Yes	OK	22.8875	50.7326	2.00366	128.043	10.0443	14.1102	2.58224	2.00665	1.07244	2.35332
ENSMUSG00000021118	Plek2	27260	pleckstrin 2	chr12:78888696-78906938	-	-2.06008	0.581321	-3.5438	0.000394411	0.0277339	Yes	OK	28.0764	57.4175	6.07064	106.703	33.481	32.0687	6.45559	5.35107	9.65193	2.82399
ENSMUSG00000043088	Il17re	57890	interleukin 17 receptor E	chr6:113458483-113470751	+	-2.16916	0.613047	-3.53833	0.000402664	0.0281546	Yes	OK	44.2047	96.4834	4.99565	202.735	33.481	53.234	6.45559	6.01995	7.50705	0
ENSMUSG00000049811	Fam161a	73873	family with sequence similarity 161, member A	chr11:23013386-23023741	+	-1.57961	0.446528	-3.53754	0.000403875	0.0281546	Yes	OK	139.055	241.454	62.2567	458.822	121.871	143.668	60.6825	76.2527	62.2013	49.8904
ENSMUSG00000074671	Tspyl3	241732	TSPY-like 3	chr2:153222369-153225441	-	0.863659	0.244436	3.53328	0.000410442	0.028374	Yes	OK	257.068	170.288	322.154	160.054	166.735	184.074	402.829	280.931	304.572	300.284
ENSMUSG00000038267	Slc22a23	73102	solute carrier family 22, member 23	chr13:34179157-34345182	-	0.780683	0.220955	3.53322	0.000410531	0.028374	Yes	OK	1966.78	1374.54	2410.95	1312.44	1384.77	1426.41	2569.97	2694.93	1762.01	2616.89
ENSMUSG00000022762	Ncam2	17968	neural cell adhesion molecule 2	chr16:81200696-81597805	+	0.881146	0.249801	3.52739	0.000419678	0.0288208	Yes	OK	3745.37	2469.83	4702.02	1867.3	2860.62	2681.58	5343.29	4488.21	3731.01	5245.56
ENSMUSG00000073643	Wdfy1	69368	WD repeat and FYVE domain containing 1	chr1:79702261-79761769	-	1.04026	0.294954	3.52683	0.000420559	0.0288208	Yes	OK	1095.72	655.493	1425.89	554.855	500.876	910.75	1045.16	1684.25	1682.65	1291.5
ENSMUSG00000031488	Rab11fip1	75767	RAB11 family interacting protein 1 (class I)	chr8:27138772-27174646	-	-1.60293	0.454936	-3.52342	0.000426019	0.0290718	Yes	OK	192.578	335.227	85.5919	640.217	194.859	170.605	80.6949	80.266	128.692	52.7144
ENSMUSG00000090210	Itga10	213119	integrin, alpha 10	chr3:96645583-96664519	+	-1.45843	0.414271	-3.52047	0.000430786	0.0292735	Yes	OK	115.151	193.002	56.7624	320.108	116.514	142.385	49.708	74.2461	57.9116	45.1838
ENSMUSG00000032092	Mpzl2	14012	myelin protein zero-like 2	chr9:45042343-45054043	+	-1.99428	0.568049	-3.51076	0.000446825	0.0302364	Yes	OK	151.874	300.041	40.7497	373.46	123.88	402.782	66.4926	14.7154	76.143	5.64797
ENSMUSG00000033256	Shf	435684	Src homology 2 domain containing F	chr2:122348891-122368918	-	-1.29844	0.37093	-3.50051	0.000464372	0.031031	Yes	OK	862.278	1346.98	498.753	768.26	1286.34	1986.33	802.43	462.198	349.614	380.768
ENSMUSG00000042828	Trim72	434246	tripartite motif-containing 72	chr7:128004377-128011393	+	-2.13348	0.609521	-3.50026	0.000464809	0.031031	Yes	OK	37.2571	80.184	5.06192	192.065	39.5076	8.97922	3.22779	6.68883	7.50705	2.82399
ENSMUSG00000036168	Ccdc38	237465	coiled-coil domain containing 38	chr10:93540631-93584326	+	-2.07897	0.593947	-3.50026	0.00046481	0.031031	Yes	OK	46.7155	97.244	8.81904	234.746	28.124	28.8618	13.5567	8.69548	6.43462	6.5893
ENSMUSG00000059854	Hydin	244653	HYDIN, axonemal central pair apparatus protein	chr8:110266976-110610253	+	-2.08864	0.59685	-3.49944	0.000466242	0.031031	Yes	OK	160.777	333.251	31.4209	704.239	117.853	177.66	27.759	34.7819	62.2013	0.941329
ENSMUSG00000075570	Krt26	320864	keratin 26	chr11:99328483-99337965	-	-2.12743	0.608257	-3.49758	0.000469508	0.0311203	Yes	OK	28.9842	66.1887	1.08089	170.725	21.4278	6.41373	2.58224	0.668883	1.07244	0
ENSMUSG00000052221	Ppp1r36	210762	protein phosphatase 1, regulatory subunit 36	chr12:76417598-76439491	+	-1.9628	0.561546	-3.49534	0.000473449	0.0311307	Yes	OK	62.1567	122.942	16.5679	266.757	62.9443	39.1238	16.139	16.0532	24.666	9.41329
ENSMUSG00000032036	Kirrel3	67703	kin of IRRE like 3 (Drosophila)	chr9:34488730-35036307	+	-0.923241	0.264137	-3.49531	0.000473515	0.0311307	Yes	OK	944.601	1303.74	675.249	810.941	1517.36	1582.91	602.307	625.406	759.285	713.998
ENSMUSG00000028926	Cdk14	18647	cyclin-dependent kinase 14	chr5:4803383-5380251	-	0.934756	0.268032	3.48748	0.00048759	0.0318889	Yes	OK	3602.06	2311.43	4570.04	2379.47	2366.44	2188.36	6118.61	3709.63	5056.54	3395.37
ENSMUSG00000038119	Cdon	57810	cell adhesion molecule-related/down-regulated by oncogenes	chr9:35452075-35507652	+	-1.21098	0.347313	-3.48672	0.000488991	0.0318889	Yes	OK	430.507	653.455	263.296	501.503	601.989	856.874	380.88	260.196	275.616	136.493
ENSMUSG00000071540	3425401B19Rik	100504518	RIKEN cDNA 3425401B19 gene	chr14:32659118-32685272	-	-2.13741	0.614172	-3.48014	0.000501144	0.0325502	Yes	OK	29.477	65.1264	2.73988	170.725	6.6962	17.9584	2.58224	2.67553	4.28974	1.41199
ENSMUSG00000043587	Pxylp1	235534	2-phosphoxylose phosphatase 1	chr9:96823342-96889474	-	-1.03163	0.296857	-3.47518	0.00051052	0.0330266	Yes	OK	349.421	498.056	237.945	330.779	454.672	708.717	295.02	243.474	200.546	212.74
ENSMUSG00000033268	Duox1	99439	dual oxidase 1	chr2:122315671-122347972	+	-2.04395	0.588506	-3.47311	0.000514462	0.033149	Yes	OK	61.3353	125.757	13.0187	277.427	25.4456	74.3993	5.16447	24.0798	9.65193	13.1786
ENSMUSG00000053965	Pde5a	242202	phosphodiesterase 5A, cGMP-specific	chr3:122729157-122859374	+	-1.75671	0.506076	-3.47125	0.000518051	0.0332477	Yes	OK	1044.21	1897.04	404.595	629.547	1699.5	3362.08	704.95	380.595	435.409	97.4275
ENSMUSG00000055235	Wdr86	269633	WD repeat domain 86	chr5:24712268-24730680	-	-2.08919	0.602651	-3.46667	0.000526943	0.0336848	Yes	OK	91.7135	191.648	16.7623	266.757	144.638	163.55	9.68338	6.01995	50.4045	0.941329
ENSMUSG00000032179	Bmp5	12160	bone morphogenetic protein 5	chr9:75775364-75900316	+	-1.35467	0.390917	-3.46538	0.000529491	0.0337144	Yes	OK	179.472	286.802	98.9747	320.108	173.432	366.865	67.7837	125.081	136.199	66.8344
ENSMUSG00000024981	Acsl5	433256	acyl-CoA synthetase long-chain family member 5	chr19:55253368-55296628	+	1.19574	0.345786	3.45805	0.000544106	0.0345091	Yes	OK	1142.67	620.483	1534.31	661.557	711.806	488.085	2540.92	1467.53	1181.82	946.977
ENSMUSG00000053675	Tgm5	74176	transglutaminase 5	chr2:121046110-121085759	-	-2.11965	0.613376	-3.45571	0.000548847	0.0346225	Yes	OK	23.1443	51.6894	1.73549	106.703	21.4278	26.9377	0.645559	2.00665	4.28974	0
ENSMUSG00000073433	Arhgdig	14570	Rho GDP dissociation inhibitor (GDI) gamma	chr17:26199182-26201350	-	1.28212	0.371129	3.45464	0.000551038	0.0346225	Yes	OK	462.283	241.46	627.901	341.449	213.609	169.322	894.099	387.952	821.486	408.066
ENSMUSG00000010825	Grid2ip	170935	glutamate receptor, ionotropic, delta 2 (Grid2) interacting protein 1	chr5:143363907-143391798	+	-1.73076	0.501087	-3.45401	0.000552316	0.0346225	Yes	OK	428.116	771.892	170.283	533.514	846.4	935.763	30.3413	347.15	108.316	195.326
ENSMUSG00000032717	Mdfi	17240	MyoD family inhibitor	chr17:47815327-47833291	-	-1.89901	0.550262	-3.45111	0.000558289	0.0348618	Yes	OK	82.9585	159.808	25.3212	234.746	68.3013	176.378	5.16447	30.7686	22.5212	42.8305
ENSMUSG00000041992	Rapgef5	217944	Rap guanine nucleotide exchange factor (GEF) 5	chr12:117516478-117756978	+	1.10961	0.32188	3.44727	0.000566281	0.0352248	Yes	OK	2288.17	1317.38	3016.25	1461.83	1243.48	1246.83	4935.3	2666.17	2215.65	2247.89
ENSMUSG00000025557	Slc15a1	56643	solute carrier family 15 (oligopeptide transporter), member 1	chr14:121459620-121505254	-	-2.10578	0.611239	-3.44509	0.000570861	0.0353737	Yes	OK	26.0567	58.8939	1.42877	160.054	14.062	2.56549	1.29112	1.33777	2.14487	0.941329
ENSMUSG00000085720	Gm7854	665934	predicted gene 7854	chr5:43151685-43235354	-	-1.9023	0.552427	-3.44353	0.000574181	0.0354436	Yes	OK	190.679	365.173	59.8092	138.714	285.928	670.876	76.176	51.504	104.026	7.53063
ENSMUSG00000003476	Crhr2	12922	corticotropin releasing hormone receptor 2	chr6:55090048-55133016	-	-2.10901	0.61292	-3.44093	0.000579727	0.0356499	Yes	OK	53.3464	115.616	6.64397	266.757	58.9266	21.1653	7.74671	3.34442	15.0141	0.470664
ENSMUSG00000041245	Wnk3	279561	WNK lysine deficient protein kinase 3	chrX:151198077-151320192	+	0.797567	0.231883	3.43952	0.000582741	0.0356995	Yes	OK	1517.31	1042.07	1873.74	821.612	1220.05	1084.56	2227.82	1872.2	1898.21	1496.71
ENSMUSG00000027861	Casq2	12373	calsequestrin 2	chr3:102086454-102146512	+	-2.05326	0.597475	-3.43657	0.000589137	0.0359551	Yes	OK	127.654	262.392	26.5995	85.3623	231.689	470.126	30.3413	11.371	63.2737	1.41199
ENSMUSG00000004633	Chn2	69993	chimerin 2	chr6:54264857-54301812	+	-1.74072	0.506777	-3.43488	0.000592822	0.0360239	Yes	OK	2939.26	5328.17	1147.57	853.623	6254.92	8875.96	1183.31	948.477	656.331	1802.17
ENSMUSG00000035258	Abi3bp	320712	ABI gene family, member 3 (NESH) binding protein	chr16:56477845-56690135	+	-1.78348	0.519357	-3.43401	0.000594718	0.0360239	Yes	OK	140.128	257.97	51.7472	266.757	299.99	207.164	118.137	32.7753	42.8974	13.1786
ENSMUSG00000021221	Dpf3	70127	D4, zinc and double PHD fingers, family 3	chr12:83269010-83487736	-	-1.29171	0.376374	-3.43197	0.000599211	0.0361606	Yes	OK	258.742	403.254	150.358	309.438	315.391	584.932	74.8848	199.327	158.721	168.498
ENSMUSG00000026639	Lamb3	16780	laminin, beta 3	chr1:193302242-193343878	+	-1.80946	0.528527	-3.4236	0.000617979	0.0371545	Yes	OK	95.4822	179.893	32.1744	384.13	53.5696	101.978	27.759	44.8152	27.8833	28.2399
ENSMUSG00000022245	Skor1	207667	SKI family transcriptional corepressor 1	chr9:63138163-63147011	-	-2.07225	0.605466	-3.42256	0.000620344	0.0371586	Yes	OK	130.517	273.579	23.2202	309.438	231.019	280.28	7.10115	8.69548	76.143	0.941329
ENSMUSG00000028463	Car9	230099	carbonic anhydrase 9	chr4:43507025-43513725	+	-2.06968	0.605161	-3.42004	0.000626111	0.0373656	Yes	OK	33.2419	70.2002	5.52313	138.714	46.8734	25.0135	0.645559	9.36437	6.43462	5.64797
ENSMUSG00000087211	Lhx1os	78365	LIM homeobox 1, opposite strand	chr11:84525659-84535831	+	-2.08407	0.609916	-3.41697	0.000633216	0.0375975	Yes	OK	136.749	290.15	21.6987	42.6811	374.318	453.451	3.87335	29.4309	52.5494	0.941329
ENSMUSG00000037490	Slc2a12	353169	solute carrier family 2 (facilitated glucose transporter), member 12	chr10:22645010-22703880	+	-1.30265	0.381299	-3.41636	0.000634646	0.0375975	Yes	OK	287.813	448.455	167.332	213.406	758.68	373.279	129.112	202.003	190.894	147.318
ENSMUSG00000035279	Ssc5d	269855	scavenger receptor cysteine rich family, 5 domains	chr7:4925843-4944797	+	-1.77351	0.519811	-3.41183	0.000645276	0.0380878	Yes	OK	158.748	294.022	57.2922	608.206	197.538	76.3234	28.4046	52.8418	85.7949	62.1277
ENSMUSG00000021187	Tc2n	74413	tandem C2 domains, nuclear	chr12:101645445-101711573	-	-1.93111	0.566445	-3.40917	0.000651598	0.038321	Yes	OK	89.5237	175.81	24.8086	320.108	140.62	66.7028	55.5181	8.69548	24.666	10.3546
ENSMUSG00000037762	Slc16a9	66859	solute carrier family 16 (monocarboxylic acid transporters), member 9	chr10:70245275-70285951	+	-0.880201	0.258648	-3.40308	0.000666311	0.0390444	Yes	OK	238.086	326.903	171.474	341.449	269.187	370.072	131.694	193.976	182.314	177.911
ENSMUSG00000051228	Nyx	236690	nyctalopin	chrX:13467671-13489313	+	-2.02175	0.594727	-3.39946	0.000675184	0.0394215	Yes	OK	46.9341	96.6784	9.62586	202.735	32.1418	55.1581	12.9112	8.69548	15.0141	1.88266
ENSMUSG00000032735	Ablim3	319713	actin binding LIM protein family, member 3	chr18:61799392-61911824	-	-1.58689	0.468652	-3.38607	0.000709003	0.0410993	Yes	OK	416.277	717.622	190.269	533.514	559.802	1059.55	361.513	137.121	210.197	52.2438
ENSMUSG00000108709	4933431G14Rik	71265	RIKEN cDNA 4933431G14 gene	chr6:72120212-72122940	-	-2.04236	0.604132	-3.38065	0.000723141	0.0417691	Yes	OK	20.1798	42.5722	3.38544	74.692	25.4456	27.579	3.87335	2.00665	1.07244	6.5893
ENSMUSG00000046192	Iqub	214704	IQ motif and ubiquitin domain containing	chr6:24444864-24515067	-	-1.79198	0.531154	-3.37374	0.000741532	0.042679	Yes	OK	115.236	213.431	41.59	181.395	174.771	284.128	69.7204	20.7354	66.491	9.41329
ENSMUSG00000020913	Krt24	75706	keratin 24	chr11:99280092-99285238	-	-2.06422	0.612141	-3.37213	0.000745904	0.0427784	Yes	OK	15.2677	34.1802	1.08338	64.0217	16.0709	22.4481	0.645559	0	3.21731	0.470664
ENSMUSG00000036395	Glb1l2	244757	galactosidase, beta 1-like 2	chr9:26763043-26806468	-	-1.82139	0.540919	-3.36721	0.000759328	0.0431194	Yes	OK	72.8228	137.874	24.0342	234.746	135.263	43.6134	23.2401	28.0931	35.3904	9.41329
ENSMUSG00000047037	Nipa1	233280	non imprinted in Prader-Willi/Angelman syndrome 1 homolog (human)	chr7:55978483-56019573	-	0.899531	0.267207	3.36642	0.000761497	0.0431194	Yes	OK	1308.07	850.389	1651.34	736.249	771.402	1043.51	2175.53	1531.74	1695.52	1202.55
ENSMUSG00000037395	Rcor3	214742	REST corepressor 3	chr1:192098545-192138040	-	-0.627454	0.186417	-3.36585	0.000763069	0.0431194	Yes	OK	564.895	713.104	453.738	757.59	689.039	692.683	498.372	418.721	502.973	394.888
ENSMUSG00000026012	Cd28	12487	CD28 antigen	chr1:60746387-60773359	+	-2.01931	0.600074	-3.36509	0.00076518	0.0431194	Yes	OK	52.4319	108.906	10.0763	245.416	26.7848	54.5167	3.87335	22.0732	9.65193	4.70664
ENSMUSG00000023915	Tnfrsf21	94185	tumor necrosis factor receptor superfamily, member 21	chr17:43016554-43089188	+	0.834338	0.248193	3.36165	0.000774777	0.0435086	Yes	OK	2234.64	1524.73	2767.07	1856.63	1400.18	1317.38	2058.04	2795.26	2832.3	3382.67
ENSMUSG00000021130	Galnt16	108760	UDP-N-acetyl-alpha-D-galactosamine:polypeptide N-acetylgalactosaminyltransferase 16	chr12:80518989-80603896	+	0.896327	0.266764	3.36	0.000779417	0.0436177	Yes	OK	2166.55	1424.06	2723.42	1653.89	1388.12	1230.15	3558.97	1901.64	2908.45	2524.64
ENSMUSG00000014791	Elmo3	234683	engulfment and cell motility 3	chr8:105305600-105310623	+	-1.37985	0.411043	-3.35694	0.000788103	0.0439517	Yes	OK	131.86	216.08	68.6945	341.449	141.959	164.833	98.7705	69.5639	62.2013	44.2425
ENSMUSG00000048834	Vstm2a	211739	V-set and transmembrane domain containing 2A	chr11:16257723-16284551	+	1.4284	0.425667	3.35568	0.000791688	0.0439999	Yes	OK	1330.2	597.072	1880.05	746.92	520.295	524.002	3225.86	1676.89	2025.83	591.625
ENSMUSG00000070780	Rbm47	245945	RNA binding motif protein 47	chr5:66016548-66150978	-	-1.34749	0.401996	-3.35199	0.000802321	0.0444382	Yes	OK	163.546	261.017	90.4428	266.757	288.606	227.687	42.6069	79.5971	150.141	89.4263
ENSMUSG00000022371	Col14a1	12818	collagen, type XIV, alpha 1	chr15:55307749-55520803	+	-1.74407	0.520647	-3.34982	0.000808637	0.0446351	Yes	OK	115.677	214.067	41.8849	458.822	105.13	78.2475	40.6702	23.4109	49.3321	54.1264
ENSMUSG00000101609	Kcnq1ot1	63830	KCNQ1 overlapping transcript 1	chr7:143213110-143296547	-	-1.17546	0.351262	-3.34639	0.000818713	0.0450376	Yes	OK	2053.3	3106.88	1263.12	4908.33	2150.82	2261.48	1358.9	1706.99	1100.32	886.261
ENSMUSG00000021277	Traf3	22031	TNF receptor-associated factor 3	chr12:111166369-111267155	+	0.778451	0.232742	3.3447	0.000823718	0.0451593	Yes	OK	1809.99	1260.48	2222.12	1088.37	1351.96	1341.11	2072.89	2377.88	1704.1	2733.62
ENSMUSG00000048004	Tmem196	217951	transmembrane protein 196	chr12:119945961-120021245	+	0.977864	0.292776	3.33998	0.000837844	0.0457786	Yes	OK	657.612	414.827	839.701	490.833	426.548	327.1	652.015	689.619	780.734	1236.44
ENSMUSG00000026098	Pms1	227099	postmeiotic segregation increased 1 (S. cerevisiae)	chr1:53189188-53297028	-	-1.49981	0.449254	-3.33844	0.0008425	0.045878	Yes	OK	1054.28	1768.74	518.433	458.822	1578.96	3268.44	442.208	464.874	703.518	463.134
ENSMUSG00000041078	Grid1	14803	glutamate receptor, ionotropic, delta 1	chr14:34820135-35581115	+	0.82441	0.247295	3.33371	0.000856972	0.0465094	Yes	OK	1590.34	1080.05	1973.05	949.655	1159.11	1131.38	2240.09	2357.15	1377.01	1917.96
ENSMUSG00000056569	Mpz	17528	myelin protein zero	chr1:171155517-171161130	+	-2.0127	0.60422	-3.33108	0.000865107	0.0467939	Yes	OK	18.2345	41.719	0.621107	96.0325	21.4278	7.69648	0	0	1.07244	1.41199
ENSMUSG00000024735	Prpf19	28000	pre-mRNA processing factor 19	chr19:10895230-10909559	+	0.568828	0.171029	3.32591	0.000881292	0.0473743	Yes	OK	2526.83	1970.19	2944.32	1984.67	1931.85	1994.03	2779.78	2658.81	3024.27	3314.42
ENSMUSG00000032514	Ttc21a	74052	tetratricopeptide repeat domain 21A	chr9:119937605-119967793	+	-1.85696	0.558353	-3.32579	0.000881696	0.0473743	Yes	OK	64.2811	123.67	19.7394	192.065	106.47	72.4752	14.8479	23.4109	36.4628	4.23598
ENSMUSG00000034402	Kcnh5	238271	potassium voltage-gated channel, subfamily H (eag-related), member 5	chr12:74897216-75177332	-	1.42616	0.428983	3.3245	0.000885767	0.0473906	Yes	OK	805.923	360.559	1139.95	394.8	455.342	231.536	2338.86	692.294	649.896	878.731
ENSMUSG00000030795	Fus	233908	fused in sarcoma	chr7:127967478-127982031	+	-0.800636	0.240877	-3.32384	0.00088786	0.0473906	Yes	OK	1019.44	1367.59	758.326	1728.59	1394.82	979.377	734.001	806.673	828.993	663.637
ENSMUSG00000041762	Gpr155	68526	G protein-coupled receptor 155	chr2:73341505-73386480	-	0.842292	0.253871	3.31779	0.000907315	0.0482697	Yes	OK	1486.02	997.582	1852.34	842.952	1077.42	1072.38	1568.06	1757.83	1540.02	2543.47
