# Supplementary material for: A tumor suppressor role for EZH2 in diffuse midline glioma pathogenesis
Source: Acta Neuropathol Commun. 2022 Apr 8;10:47. doi: 10.1186/s40478-022-01336-5 (PMC8994223; doi:10.1186/s40478-022-01336-5)
Supplement: Supplementary file 5 — Additional file 5. Ranking of significantly differentially enriched gene-sets by GSEA enriched in opposite directions in EZH2 GOF vs. EZH2 WT comparison and EZH2 LOF vs. EZH2 WT comparison. [file 40478_2022_1336_MOESM5_ESM.xlsx]

## Sheet: Hallmark
	EZH2_KnockDown ranks		EZH2_Y641F ranks		EZH2_KnockDown						EZH2_Y641F
NAME	Rank EZH2_KD_positive	Rank EZH2_KD_negative	Rank EZH2_Y641_positive	Rank EZH2_Y641_negative	ES	NES	NOM p-val	FDR q-val	FWER p-val		ES	NES	NOM p-val	FDR q-val	FWER p-val
HALLMARK_OXIDATIVE_PHOSPHORYLATION	NA	1	1	NA	-0.314488	-4.85842	0	0	0		0.525173	8.06985	0	0	0
HALLMARK_MYC_TARGETS_V1	NA	18	2	NA	-0.103317	-1.65978	0.0330739	0.0665426	0.577		0.444168	7.12715	0	0	0
HALLMARK_PROTEIN_SECRETION	NA	2	3	NA	-0.339809	-3.81576	0	0	0		0.499036	5.61897	0	0	0
HALLMARK_MTORC1_SIGNALING	NA	7	4	NA	-0.161574	-2.48061	0	0.000671218	0.004		0.343977	5.48851	0	0	0
HALLMARK_ADIPOGENESIS	NA	3	5	NA	-0.210477	-3.21344	0	0	0		0.297458	4.99363	0	0	0
HALLMARK_FATTY_ACID_METABOLISM	NA	4	6	NA	-0.21551	-2.86722	0	0	0		0.298103	4.13138	0	0	0
HALLMARK_PI3K_AKT_MTOR_SIGNALING	NA	21	7	NA	-0.118197	-1.32883	0.160966	0.230961	0.971		0.307667	3.72895	0	0	0
HALLMARK_HEME_METABOLISM	NA	11	8	NA	-0.129564	-1.91528	0.00408163	0.0266532	0.196		0.241094	3.7046	0	0	0
HALLMARK_ANDROGEN_RESPONSE	NA	20	9	NA	-0.132631	-1.42528	0.109405	0.161518	0.913		0.313803	3.50449	0	0	0
HALLMARK_GLYCOLYSIS	NA	13	10	NA	-0.118335	-1.78773	0.0213592	0.0473772	0.365		0.210034	3.43281	0	0	0
HALLMARK_PEROXISOME	NA	14	11	NA	-0.165681	-1.77687	0.0144628	0.0464951	0.38		0.296461	3.38479	0	0	0
HALLMARK_APOPTOSIS	NA	19	12	NA	-0.108203	-1.50476	0.0658436	0.125459	0.837		0.219336	3.17666	0	0	0
HALLMARK_HYPOXIA	NA	8	13	NA	-0.148311	-2.21161	0.00197628	0.00577563	0.037		0.189603	2.96572	0	0	0
HALLMARK_REACTIVE_OXYGEN_SPECIES_PATHWAY	NA	12	14	NA	-0.225587	-1.80793	0.0100806	0.0466003	0.339		0.327028	2.56312	0	0.000239829	0.003
HALLMARK_COMPLEMENT	NA	16	15	NA	-0.123388	-1.74931	0.00968992	0.0467372	0.414		0.140397	2.21971	0	0.0023137	0.036
HALLMARK_KRAS_SIGNALING_UP	NA	6	16	NA	-0.170855	-2.557	0	0.000767106	0.004		0.130583	2.06523	0.00198807	0.0045184	0.076
HALLMARK_TGF_BETA_SIGNALING	NA	15	17	NA	-0.208722	-1.76314	0.022	0.046411	0.391		0.229694	1.99091	0	0.006521	0.113
HALLMARK_XENOBIOTIC_METABOLISM	NA	9	18	NA	-0.154475	-1.99718	0.00411523	0.0196911	0.128		0.119876	1.95144	0	0.00803469	0.14
HALLMARK_EPITHELIAL_MESENCHYMAL_TRANSITION	NA	5	19	NA	-0.193496	-2.82134	0	0	0		0.114003	1.84292	0.0139721	0.014702	0.258
HALLMARK_BILE_ACID_METABOLISM	NA	10	20	NA	-0.192083	-1.98675	0.00198807	0.0187992	0.134		0.111548	1.37019	0.11134	0.138351	0.958
HALLMARK_ANGIOGENESIS	NA	17	21	NA	-0.274185	-1.73388	0.0229645	0.0479325	0.441		0.190162	1.31177	0.155508	0.170921	0.983

## Sheet: c2cp
	EZH2_KnockDown ranks		EZH2_Y641F ranks		EZH2_KnockDown						EZH2_Y641F
NAME	Rank EZH2_KD_positive	Rank EZH2_KD_negative	Rank EZH2_Y641_positive	Rank EZH2_Y641_negative	ES	NES	NOM p-val	FDR q-val	FWER p-val		ES	NES	NOM p-val	FDR q-val	FWER p-val
REACTOME_REPRODUCTION	1	NA	NA	2	0.294458	2.54816	0.0018797	0.00310619	0.071		-0.215609	-2.30407	0	0.00564682	0.397
REACTOME_RESOLUTION_OF_D_LOOP_STRUCTURES_THROUGH_SYNTHESIS_DEPENDENT_STRAND_ANNEALING_SDSA	2	NA	NA	4	0.421897	2.50717	0.00212766	0.00322885	0.096		-0.236946	-1.42835	0.0877551	0.196631	1
REACTOME_ACTIVATION_OF_THE_PRE_REPLICATIVE_COMPLEX	3	NA	NA	5	0.35252	2.38606	0	0.00545911	0.213		-0.211303	-1.42064	0.0984252	0.199339	1
KEGG_BASAL_CELL_CARCINOMA	4	NA	NA	34	0.277599	1.95245	0.012024	0.0467384	0.992		-0.251697	-2.19531	0	0.00936559	0.663
KEGG_PRIMARY_IMMUNODEFICIENCY	5	NA	NA	3	0.399744	1.94084	0.00195695	0.0474425	0.995		-0.28019	-1.97883	0	0.0270847	0.986
KEGG_INTESTINAL_IMMUNE_NETWORK_FOR_IGA_PRODUCTION	6	NA	NA	1	0.356822	1.71912	0.0258449	0.116306	1		-0.420557	-2.78165	0	0.00032298	0.013
REACTOME_TRANSLATION	NA	42	1	NA	-0.137449	-2.44342	0	0.00475918	0.156		0.406198	7.82451	0	0	0
REACTOME_CLASS_I_MHC_MEDIATED_ANTIGEN_PROCESSING_PRESENTATION	NA	70	2	NA	-0.107516	-2.18341	0	0.0178019	0.66		0.337513	7.22497	0	0	0
REACTOME_ASPARAGINE_N_LINKED_GLYCOSYLATION	NA	1	3	NA	-0.201811	-3.81674	0	0	0		0.35986	7.03004	0	0	0
REACTOME_ANTIGEN_PROCESSING_UBIQUITINATION_PROTEASOME_DEGRADATION	NA	87	4	NA	-0.11115	-2.10237	0.00195312	0.02454	0.834		0.347727	6.80713	0	0	0
REACTOME_HIV_INFECTION	NA	193	5	NA	-0.105515	-1.7493	0.0266393	0.0814764	1		0.35489	6.10966	0	0	0
REACTOME_AUTOPHAGY	NA	21	6	NA	-0.213195	-2.81617	0	0.000491466	0.009		0.435329	6.03603	0	0	0
REACTOME_NEURONAL_SYSTEM	NA	13	7	NA	-0.144816	-3.07477	0	0	0		0.258512	5.96854	0	0	0
REACTOME_TRANSPORT_TO_THE_GOLGI_AND_SUBSEQUENT_MODIFICATION	NA	3	8	NA	-0.249676	-3.75428	0	0	0		0.390222	5.96733	0	0	0
REACTOME_INTRA_GOLGI_AND_RETROGRADE_GOLGI_TO_ER_TRAFFIC	NA	22	9	NA	-0.185431	-2.80807	0	0.000470988	0.009		0.382963	5.86571	0	0	0
REACTOME_ER_TO_GOLGI_ANTEROGRADE_TRANSPORT	NA	5	10	NA	-0.273588	-3.67094	0	0	0		0.414292	5.70187	0	0	0
REACTOME_MITOCHONDRIAL_TRANSLATION	NA	25	11	NA	-0.238726	-2.71892	0	0.000950353	0.021		0.484173	5.59509	0	0	0
REACTOME_NEDDYLATION	NA	52	12	NA	-0.140133	-2.33691	0.0019084	0.00912423	0.338		0.31154	5.51026	0	0	0
REACTOME_THE_CITRIC_ACID_TCA_CYCLE_AND_RESPIRATORY_ELECTRON_TRANSPORT	NA	4	13	NA	-0.271013	-3.69735	0	0	0		0.385262	5.41167	0	0	0
REACTOME_INTRACELLULAR_SIGNALING_BY_SECOND_MESSENGERS	NA	311	14	NA	-0.0786518	-1.47207	0.0847108	0.185725	1		0.269275	5.38936	0	0	0
KEGG_UBIQUITIN_MEDIATED_PROTEOLYSIS	NA	211	15	NA	-0.134121	-1.7104	0.0292887	0.0908888	1		0.402873	5.31522	0	0	0
REACTOME_GOLGI_TO_ER_RETROGRADE_TRANSPORT	NA	57	16	NA	-0.18409	-2.31025	0	0.00997378	0.394		0.387293	5.12049	0	0	0
REACTOME_RESPIRATORY_ELECTRON_TRANSPORT	NA	7	17	NA	-0.322501	-3.48844	0	0	0		0.464697	5.10544	0	0	0
REACTOME_SIGNALING_BY_RECEPTOR_TYROSINE_KINASES	NA	71	18	NA	-0.0949379	-2.18138	0	0.017734	0.664		0.197526	5.1023	0	0	0
REACTOME_SIGNALING_BY_WNT	NA	158	19	NA	-0.104951	-1.83652	0.00619835	0.0624154	1		0.266001	5.09184	0	0	0
KEGG_HUNTINGTONS_DISEASE	NA	18	20	NA	-0.214053	-2.90883	0	0.0001243	0.002		0.36102	5.06662	0	0	0
REACTOME_NEUTROPHIL_DEGRANULATION	NA	11	21	NA	-0.155007	-3.22934	0	0	0		0.216491	5.03676	0	0	0
REACTOME_FLT3_SIGNALING	NA	69	22	NA	-0.125286	-2.18946	0	0.0173639	0.65		0.269241	4.9892	0	0	0
REACTOME_FC_EPSILON_RECEPTOR_FCERI_SIGNALING	NA	81	23	NA	-0.169872	-2.14269	0.00197628	0.019872	0.76		0.36884	4.94262	0	0	0
REACTOME_TRANSMISSION_ACROSS_CHEMICAL_SYNAPSES	NA	27	24	NA	-0.160167	-2.68224	0	0.00126709	0.03		0.260276	4.91744	0	0	0
KEGG_ENDOCYTOSIS	NA	185	25	NA	-0.122238	-1.77849	0.0142857	0.0734136	1		0.327031	4.91521	0	0	0
REACTOME_HEDGEHOG_OFF_STATE	NA	212	26	NA	-0.142183	-1.7072	0.0434783	0.0920242	1		0.400801	4.91089	0	0	0
KEGG_OXIDATIVE_PHOSPHORYLATION	NA	2	27	NA	-0.366538	-3.79999	0	0	0		0.424602	4.86948	0	0	0
REACTOME_SIGNALING_BY_HEDGEHOG	NA	180	28	NA	-0.13324	-1.78289	0.0264151	0.0735504	1		0.345537	4.84505	0	0	0
REACTOME_DEGRADATION_OF_BETA_CATENIN_BY_THE_DESTRUCTION_COMPLEX	NA	98	29	NA	-0.193491	-2.06544	0	0.0272293	0.898		0.45774	4.83584	0	0	0
REACTOME_MAPK_FAMILY_SIGNALING_CASCADES	NA	173	30	NA	-0.100069	-1.81095	0.0103093	0.0656489	1		0.246624	4.83352	0	0	0
REACTOME_RESPIRATORY_ELECTRON_TRANSPORT_ATP_SYNTHESIS_BY_CHEMIOSMOTIC_COUPLING_AND_HEAT_PRODUCTION_BY_UNCOUPLING_PROTEINS	NA	9	31	NA	-0.301135	-3.35426	0	0	0		0.431208	4.82537	0	0	0
REACTOME_COPI_MEDIATED_ANTEROGRADE_TRANSPORT	NA	6	32	NA	-0.325352	-3.54607	0	0	0		0.437952	4.8163	0	0	0
KEGG_PARKINSONS_DISEASE	NA	8	33	NA	-0.307824	-3.37767	0	0	0		0.421554	4.80174	0	0	0
REACTOME_REGULATION_OF_RAS_BY_GAPS	NA	46	34	NA	-0.259654	-2.39968	0	0.00633929	0.213		0.508819	4.80081	0	0	0
KEGG_ALZHEIMERS_DISEASE	NA	12	35	NA	-0.253541	-3.22496	0	0	0		0.346643	4.78811	0	0	0
PID_PDGFRB_PATHWAY	NA	175	36	NA	-0.13995	-1.80781	0.0206186	0.0660652	1		0.364667	4.77324	0	0	0
KEGG_LYSOSOME	NA	24	37	NA	-0.229038	-2.73096	0	0.000845987	0.018		0.371739	4.76272	0	0	0
REACTOME_EPH_EPHRIN_SIGNALING	NA	266	38	NA	-0.143533	-1.56946	0.0383838	0.141035	1		0.422281	4.72395	0	0	0
REACTOME_DEGRADATION_OF_AXIN	NA	45	39	NA	-0.287539	-2.41491	0	0.00591962	0.198		0.540018	4.72382	0	0	0
REACTOME_PROGRAMMED_CELL_DEATH	NA	171	40	NA	-0.123457	-1.81752	0.021645	0.0640062	1		0.314542	4.72006	0	0	0
REACTOME_SIGNALING_BY_NOTCH	NA	307	41	NA	-0.0978363	-1.47738	0.0668016	0.18353	1		0.293621	4.6766	0	0	0
REACTOME_NEUROTRANSMITTER_RECEPTORS_AND_POSTSYNAPTIC_SIGNAL_TRANSMISSION	NA	19	42	NA	-0.197368	-2.87624	0	0.000179917	0.003		0.283337	4.64454	0	0	0
REACTOME_REGULATION_OF_PTEN_STABILITY_AND_ACTIVITY	NA	47	43	NA	-0.249954	-2.3962	0	0.00633756	0.217		0.490236	4.57725	0	0	0
REACTOME_TRANS_GOLGI_NETWORK_VESICLE_BUDDING	NA	101	44	NA	-0.214518	-2.06064	0.00389105	0.0270012	0.904		0.47535	4.56486	0	0	0
REACTOME_DEGRADATION_OF_GLI1_BY_THE_PROTEASOME	NA	62	45	NA	-0.265768	-2.24519	0	0.0139017	0.523		0.51664	4.55643	0	0	0
REACTOME_FCERI_MEDIATED_NF_KB_ACTIVATION	NA	105	46	NA	-0.20597	-2.05172	0	0.0275926	0.924		0.439259	4.55404	0	0	0
REACTOME_CLATHRIN_MEDIATED_ENDOCYTOSIS	NA	64	47	NA	-0.171997	-2.22106	0.00401606	0.0153641	0.581		0.324459	4.49815	0	0	0
REACTOME_NEGATIVE_REGULATION_OF_NOTCH4_SIGNALING	NA	91	48	NA	-0.248645	-2.08799	0.00380228	0.025573	0.859		0.531402	4.49812	0	0	0
REACTOME_ACTIVATION_OF_NMDA_RECEPTORS_AND_POSTSYNAPTIC_EVENTS	NA	50	49	NA	-0.219471	-2.34279	0	0.0092073	0.328		0.4064	4.48919	0	0	0
REACTOME_RAF_ACTIVATION	NA	189	50	NA	-0.274216	-1.75915	0.00626305	0.0796646	1		0.688059	4.48746	0	0	0
REACTOME_TCR_SIGNALING	NA	263	51	NA	-0.143237	-1.57346	0.0512334	0.140488	1		0.363421	4.40614	0	0	0
REACTOME_AUF1_HNRNP_D0_BINDS_AND_DESTABILIZES_MRNA	NA	153	52	NA	-0.220207	-1.84665	0.0134615	0.0607053	1		0.521455	4.40367	0	0	0
REACTOME_PROTEIN_LOCALIZATION	NA	26	53	NA	-0.193048	-2.70677	0	0.00113574	0.026		0.305521	4.39617	0	0	0
PID_ERBB1_DOWNSTREAM_PATHWAY	NA	85	54	NA	-0.180606	-2.10819	0	0.0239455	0.82		0.366428	4.38027	0	0	0
REACTOME_INTERLEUKIN_1_SIGNALING	NA	282	55	NA	-0.13692	-1.52819	0.0675422	0.159943	1		0.381251	4.37422	0	0	0
REACTOME_COPI_INDEPENDENT_GOLGI_TO_ER_RETROGRADE_TRAFFIC	NA	10	56	NA	-0.428631	-3.35247	0	0	0		0.541888	4.3474	0	0	0
REACTOME_EPHB_MEDIATED_FORWARD_SIGNALING	NA	82	57	NA	-0.268684	-2.14034	0.00386847	0.0200652	0.77		0.558238	4.32807	0	0	0
REACTOME_DOWNSTREAM_SIGNALING_EVENTS_OF_B_CELL_RECEPTOR_BCR	NA	154	58	NA	-0.181756	-1.84387	0.00961539	0.061379	1		0.41664	4.31993	0	0	0
REACTOME_SELECTIVE_AUTOPHAGY	NA	103	59	NA	-0.210612	-2.05471	0.00595238	0.0275627	0.917		0.424277	4.30886	0	0	0
REACTOME_GOLGI_ASSOCIATED_VESICLE_BIOGENESIS	NA	196	60	NA	-0.206586	-1.74484	0.0181818	0.0816894	1		0.477955	4.2931	0	0	0
KEGG_PROTEASOME	NA	116	61	NA	-0.274498	-2.0083	0.00766283	0.0324717	0.967		0.552695	4.29189	0	0	0
REACTOME_HEDGEHOG_LIGAND_BIOGENESIS	NA	36	62	NA	-0.284791	-2.52883	0	0.00311528	0.093		0.449724	4.29008	0	0	0
REACTOME_THE_ROLE_OF_GTSE1_IN_G2_M_PROGRESSION_AFTER_G2_CHECKPOINT	NA	58	63	NA	-0.239006	-2.30419	0	0.0101612	0.401		0.438386	4.28661	0	0	0
PID_MET_PATHWAY	NA	346	64	NA	-0.134292	-1.39333	0.101167	0.230235	1		0.414363	4.28533	0	0	0
REACTOME_PCP_CE_PATHWAY	NA	225	65	NA	-0.153685	-1.66758	0.0338346	0.10507	1		0.379144	4.28363	0	0	0
REACTOME_BETA_CATENIN_INDEPENDENT_WNT_SIGNALING	NA	271	66	NA	-0.117373	-1.55198	0.0398406	0.150048	1		0.300824	4.2603	0	0	0
REACTOME_DEGRADATION_OF_DVL	NA	94	67	NA	-0.244124	-2.08037	0.00391389	0.0255234	0.873		0.476414	4.24947	0	0	0
REACTOME_REGULATION_OF_RUNX3_EXPRESSION_AND_ACTIVITY	NA	126	68	NA	-0.227882	-1.95654	0.0116959	0.0402245	0.986		0.484327	4.23735	0	0	0
REACTOME_HSP90_CHAPERONE_CYCLE_FOR_STEROID_HORMONE_RECEPTORS_SHR	NA	23	69	NA	-0.340498	-2.76258	0	0.000554252	0.011		0.504917	4.22919	0	0	0
REACTOME_APC_C_CDH1_MEDIATED_DEGRADATION_OF_CDC20_AND_OTHER_APC_C_CDH1_TARGETED_PROTEINS_IN_LATE_MITOSIS_EARLY_G1	NA	233	70	NA	-0.169658	-1.6509	0.0218688	0.110729	1		0.43032	4.2208	0	0	0
REACTOME_UCH_PROTEINASES	NA	269	71	NA	-0.146443	-1.56029	0.0612648	0.145308	1		0.393368	4.20714	0	0	0
REACTOME_MHC_CLASS_II_ANTIGEN_PRESENTATION	NA	15	72	NA	-0.262926	-2.98481	0	0	0		0.365897	4.20178	0	0	0
REACTOME_METABOLISM_OF_POLYAMINES	NA	118	73	NA	-0.230584	-2.00256	0.00189753	0.0330755	0.968		0.469049	4.18876	0	0	0
REACTOME_CLEC7A_DECTIN_1_SIGNALING	NA	295	74	NA	-0.136813	-1.50586	0.0753564	0.168161	1		0.3644	4.17858	0	0	0
REACTOME_PROTEIN_FOLDING	NA	44	75	NA	-0.222799	-2.42975	0	0.00520827	0.171		0.356266	4.13976	0	0	0
REACTOME_SIGNALING_BY_NOTCH4	NA	245	76	NA	-0.161155	-1.62304	0.0390335	0.119607	1		0.391561	4.13155	0	0	0
REACTOME_DEFECTIVE_CFTR_CAUSES_CYSTIC_FIBROSIS	NA	80	77	NA	-0.242613	-2.14318	0.00566038	0.0200627	0.759		0.462176	4.12551	0	0	0
REACTOME_MITOCHONDRIAL_PROTEIN_IMPORT	NA	119	78	NA	-0.228669	-1.98899	0.00399202	0.0352734	0.973		0.44794	4.10965	0	0	0
REACTOME_CROSS_PRESENTATION_OF_SOLUBLE_EXOGENOUS_ANTIGENS_ENDOSOMES	NA	74	79	NA	-0.273337	-2.17361	0	0.018051	0.692		0.50668	4.09598	0	0	0
REACTOME_DECTIN_1_MEDIATED_NONCANONICAL_NF_KB_SIGNALING	NA	123	80	NA	-0.226883	-1.97435	0.00819672	0.0369914	0.979		0.445464	4.09212	0	0	0
PID_TRKR_PATHWAY	NA	120	81	NA	-0.229678	-1.98789	0.0094697	0.0351967	0.973		0.463846	4.08726	0	0	0
REACTOME_ABC_FAMILY_PROTEINS_MEDIATED_TRANSPORT	NA	93	82	NA	-0.192954	-2.08106	0	0.0257154	0.871		0.357288	4.07801	0	0	0
REACTOME_FCGAMMA_RECEPTOR_FCGR_DEPENDENT_PHAGOCYTOSIS	NA	149	83	NA	-0.174947	-1.85391	0.0153257	0.0599363	1		0.389037	4.05585	0	0	0
REACTOME_SIGNALING_BY_THE_B_CELL_RECEPTOR_BCR	NA	140	84	NA	-0.157797	-1.87568	0.00829876	0.0565248	0.999		0.333022	4.03428	0	0	0
REACTOME_MAPK6_MAPK4_SIGNALING	NA	359	85	NA	-0.128477	-1.36638	0.126923	0.248376	1		0.35124	4.03135	0	0	0
REACTOME_RUNX1_REGULATES_TRANSCRIPTION_OF_GENES_INVOLVED_IN_DIFFERENTIATION_OF_HSCS	NA	147	86	NA	-0.195862	-1.85676	0.00628931	0.059792	0.999		0.409239	4.01935	0	0	0
REACTOME_COMPLEX_I_BIOGENESIS	NA	14	87	NA	-0.361914	-2.99505	0	0	0		0.484907	4.01007	0	0	0
REACTOME_STABILIZATION_OF_P53	NA	134	88	NA	-0.22849	-1.89851	0.00842105	0.0513278	0.996		0.46287	4.00426	0	0	0
REACTOME_PHOSPHOLIPID_METABOLISM	NA	83	89	NA	-0.138311	-2.12771	0	0.0215905	0.79		0.239588	3.96727	0	0	0
REACTOME_RAB_REGULATION_OF_TRAFFICKING	NA	130	90	NA	-0.156736	-1.91456	0.00954198	0.0489098	0.993		0.313626	3.94769	0	0	0
REACTOME_C_TYPE_LECTIN_RECEPTORS_CLRS	NA	183	91	NA	-0.143308	-1.77863	0.0211538	0.0741165	1		0.304911	3.9372	0	0	0
REACTOME_ANTIGEN_PROCESSING_CROSS_PRESENTATION	NA	264	92	NA	-0.145741	-1.5708	0.0469388	0.141649	1		0.352033	3.92304	0	0	0
REACTOME_HEDGEHOG_ON_STATE	NA	199	93	NA	-0.167138	-1.7318	0.0268041	0.086499	1		0.363717	3.9134	0	0	0
REACTOME_COPII_MEDIATED_VESICLE_TRANSPORT	NA	40	94	NA	-0.266364	-2.457	0	0.00456929	0.144		0.412804	3.86261	0	0	0
PID_CDC42_PATHWAY	NA	296	95	NA	-0.157042	-1.5042	0.0704846	0.168861	1		0.385287	3.83051	0	0	0
REACTOME_L1CAM_INTERACTIONS	NA	84	96	NA	-0.17735	-2.1178	0.00192678	0.0228661	0.809		0.306231	3.80596	0	0	0
REACTOME_METABOLISM_OF_AMINO_ACIDS_AND_DERIVATIVES	NA	43	97	NA	-0.127704	-2.43225	0	0.00518267	0.168		0.171177	3.80308	0	0	0
PID_FAK_PATHWAY	NA	308	98	NA	-0.169038	-1.47574	0.07	0.184311	1		0.409016	3.76529	0	0	0
REACTOME_ABC_TRANSPORTER_DISORDERS	NA	78	99	NA	-0.226481	-2.15893	0	0.0189482	0.73		0.374723	3.76034	0	0	0
REACTOME_REGULATION_OF_RUNX2_EXPRESSION_AND_ACTIVITY	NA	157	100	NA	-0.193341	-1.84032	0.0117647	0.0614497	1		0.381866	3.75654	0	0	0
KEGG_CITRATE_CYCLE_TCA_CYCLE	NA	17	101	NA	-0.482503	-2.94457	0	0.000130842	0.002		0.592122	3.75549	0	0	0
REACTOME_SIGNALING_BY_VEGF	NA	324	102	NA	-0.123195	-1.4449	0.0888889	0.199985	1		0.305594	3.72425	0	0	0
REACTOME_RAB_GEFS_EXCHANGE_GTP_FOR_GDP_ON_RABS	NA	56	103	NA	-0.21642	-2.31053	0	0.0101211	0.393		0.349545	3.71791	0	0	0
REACTOME_ASYMMETRIC_LOCALIZATION_OF_PCP_PROTEINS	NA	194	104	NA	-0.188812	-1.74888	0.0175781	0.0812245	1		0.396974	3.7168	0	0	0
REACTOME_SCF_SKP2_MEDIATED_DEGRADATION_OF_P27_P21	NA	141	105	NA	-0.208626	-1.87451	0.0120968	0.0565377	0.999		0.422613	3.69864	0	0	0
REACTOME_ORC1_REMOVAL_FROM_CHROMATIN	NA	284	106	NA	-0.162422	-1.52803	0.0484496	0.159057	1		0.370775	3.64366	0	0	0
KEGG_N_GLYCAN_BIOSYNTHESIS	NA	242	107	NA	-0.210032	-1.62742	0.0409836	0.118507	1		0.469948	3.63243	0	0	0
REACTOME_CELLULAR_RESPONSE_TO_HYPOXIA	NA	352	108	NA	-0.14624	-1.38318	0.115632	0.236485	1		0.363542	3.63114	0	0	0
REACTOME_RETROGRADE_TRANSPORT_AT_THE_TRANS_GOLGI_NETWORK	NA	220	109	NA	-0.207491	-1.68239	0.0391791	0.100693	1		0.446062	3.61798	0	0	0
REACTOME_SPHINGOLIPID_METABOLISM	NA	38	110	NA	-0.247699	-2.4843	0	0.00407802	0.123		0.34181	3.60026	0	0	0
PID_ERBB2_ERBB3_PATHWAY	NA	128	111	NA	-0.258253	-1.92444	0.0101833	0.0469588	0.992		0.463363	3.59443	0	0	0
REACTOME_ESR_MEDIATED_SIGNALING	NA	174	112	NA	-0.135435	-1.80975	0.020073	0.0657441	1		0.241846	3.56947	0	0	0
PID_REELIN_PATHWAY	NA	342	113	NA	-0.224613	-1.40439	0.134387	0.223403	1		0.568595	3.56134	0	0	0
REACTOME_PROTEIN_UBIQUITINATION	NA	112	114	NA	-0.225856	-2.01411	0.008	0.0321716	0.963		0.39013	3.55753	0	0	0
REACTOME_DARPP_32_EVENTS	NA	65	115	NA	-0.40464	-2.2181	0	0.0152679	0.584		0.606586	3.47641	0	0	0
REACTOME_INTEGRATION_OF_ENERGY_METABOLISM	NA	358	116	NA	-0.12168	-1.36666	0.112676	0.248639	1		0.288581	3.4557	0	0	0
BIOCARTA_MET_PATHWAY	NA	162	117	NA	-0.276211	-1.82886	0.0108225	0.0636992	1		0.499618	3.45361	0	0	0
REACTOME_PARASITE_INFECTION	NA	285	118	NA	-0.172337	-1.52369	0.0607211	0.161723	1		0.379642	3.43812	0	0	0
REACTOME_MITOPHAGY	NA	213	119	NA	-0.283643	-1.7071	0.0357853	0.0916672	1		0.55681	3.42815	0	0	0
KEGG_VIBRIO_CHOLERAE_INFECTION	NA	61	120	NA	-0.290142	-2.25267	0.0020202	0.013425	0.508		0.410264	3.42769	0	0	0
KEGG_REGULATION_OF_ACTIN_CYTOSKELETON	NA	276	121	NA	-0.100708	-1.53611	0.0681818	0.157672	1		0.205045	3.42493	0	0	0
PID_CXCR3_PATHWAY	NA	231	122	NA	-0.220906	-1.65614	0.0258449	0.108702	1		0.436227	3.40733	0	0	0
REACTOME_AMINO_ACIDS_REGULATE_MTORC1	NA	216	123	NA	-0.213185	-1.69909	0.0226337	0.0941844	1		0.403506	3.40084	0	0	0
REACTOME_TRANSLOCATION_OF_SLC2A4_GLUT4_TO_THE_PLASMA_MEMBRANE	NA	167	124	NA	-0.202594	-1.82219	0.0184049	0.0637843	1		0.360137	3.39977	0	0	0
REACTOME_OPIOID_SIGNALLING	NA	66	125	NA	-0.211558	-2.21111	0	0.0158263	0.602		0.302083	3.39594	0	0	0
PID_S1P_S1P3_PATHWAY	NA	260	126	NA	-0.247512	-1.58512	0.0477178	0.134999	1		0.524062	3.39463	0	0	0
REACTOME_RHO_GTPASES_ACTIVATE_WASPS_AND_WAVES	NA	243	127	NA	-0.227291	-1.62561	0.0452756	0.119071	1		0.472486	3.39391	0	0	0
REACTOME_PI_METABOLISM	NA	96	128	NA	-0.202337	-2.07309	0.00399202	0.0263575	0.883		0.319534	3.39061	0	0	0
KEGG_LONG_TERM_POTENTIATION	NA	54	129	NA	-0.245729	-2.32157	0.00204918	0.00981443	0.372		0.357612	3.37899	0	0	0
REACTOME_FORMATION_OF_TC_NER_PRE_INCISION_COMPLEX	NA	254	130	NA	-0.188304	-1.59636	0.0488798	0.131206	1		0.391788	3.36644	0	0	0
REACTOME_GLYCOSPHINGOLIPID_METABOLISM	NA	210	131	NA	-0.247806	-1.71052	0.0268595	0.0916053	1		0.450831	3.35802	0	0	0
KEGG_PURINE_METABOLISM	NA	92	132	NA	-0.157936	-2.0876	0.0106383	0.0253745	0.86		0.236932	3.32111	0	0	0
REACTOME_INTERLEUKIN_12_SIGNALING	NA	186	133	NA	-0.2424	-1.77245	0.0277778	0.0757629	1		0.421514	3.30913	0	0	0
REACTOME_G1_S_DNA_DAMAGE_CHECKPOINTS	NA	340	134	NA	-0.156754	-1.4108	0.110442	0.219173	1		0.356805	3.3061	0	0	0
PID_TGFBR_PATHWAY	NA	355	135	NA	-0.160244	-1.37058	0.116883	0.247238	1		0.375471	3.29195	0	0	0
REACTOME_GENE_AND_PROTEIN_EXPRESSION_BY_JAK_STAT_SIGNALING_AFTER_INTERLEUKIN_12_STIMULATION	NA	187	136	NA	-0.268288	-1.76211	0.0139442	0.079313	1		0.471424	3.27749	0	0	0
REACTOME_NEGATIVE_REGULATION_OF_MAPK_PATHWAY	NA	297	137	NA	-0.210294	-1.50238	0.0730689	0.16986	1		0.432934	3.25716	0	0	0
KEGG_PYRIMIDINE_METABOLISM	NA	278	138	NA	-0.148173	-1.53517	0.0609037	0.157341	1		0.289598	3.24604	0	0	0
PID_ERBB1_RECEPTOR_PROXIMAL_PATHWAY	NA	315	139	NA	-0.207832	-1.46182	0.0858283	0.191017	1		0.454125	3.23078	0	0	0
REACTOME_PHOSPHORYLATION_SITE_MUTANTS_OF_CTNNB1_ARE_NOT_TARGETED_TO_THE_PROTEASOME_BY_THE_DESTRUCTION_COMPLEX	NA	160	140	NA	-0.381006	-1.83218	0.0119284	0.0632164	1		0.695135	3.21863	0	0	0
REACTOME_COOPERATION_OF_PREFOLDIN_AND_TRIC_CCT_IN_ACTIN_AND_TUBULIN_FOLDING	NA	28	141	NA	-0.441826	-2.67048	0	0.00130798	0.032		0.510583	3.18637	0	0	0
REACTOME_SIGNALING_BY_NUCLEAR_RECEPTORS	NA	97	142	NA	-0.128643	-2.07297	0.00189394	0.0261406	0.884		0.18388	3.17387	0	0	0
REACTOME_INTRA_GOLGI_TRAFFIC	NA	205	143	NA	-0.234447	-1.71912	0.0253411	0.0896111	1		0.426476	3.16266	0	0	0
REACTOME_N_GLYCAN_TRIMMING_IN_THE_ER_AND_CALNEXIN_CALRETICULIN_CYCLE	NA	332	144	NA	-0.213795	-1.43189	0.102362	0.206329	1		0.449857	3.16134	0	0	0
REACTOME_SIGNALING_BY_PDGFR_IN_DISEASE	NA	259	145	NA	-0.300595	-1.58582	0.0553191	0.135047	1		0.588561	3.15326	0	0	0
PID_AR_NONGENOMIC_PATHWAY	NA	206	146	NA	-0.266043	-1.71864	0.019802	0.0894392	1		0.490004	3.15247	0	0	0
REACTOME_INTERLEUKIN_12_FAMILY_SIGNALING	NA	224	147	NA	-0.224142	-1.66807	0.03	0.105249	1		0.358923	3.1303	0	0	0
REACTOME_SIGNALING_BY_NTRK2_TRKB	NA	262	148	NA	-0.278361	-1.57741	0.050813	0.13843	1		0.525797	3.10822	0	0	0
PID_NCADHERIN_PATHWAY	NA	227	149	NA	-0.246683	-1.66345	0.03125	0.106599	1		0.458918	3.10546	0	0	0
REACTOME_TRANSCRIPTION_OF_THE_HIV_GENOME	NA	349	150	NA	-0.151238	-1.38689	0.134766	0.234775	1		0.334662	3.09865	0	0	0
BIOCARTA_PYK2_PATHWAY	NA	334	151	NA	-0.233269	-1.42953	0.0835073	0.206738	1		0.500105	3.08047	0	0	0
REACTOME_BIOSYNTHESIS_OF_THE_N_GLYCAN_PRECURSOR_DOLICHOL_LIPID_LINKED_OLIGOSACCHARIDE_LLO_AND_TRANSFER_TO_A_NASCENT_PROTEIN	NA	234	152	NA	-0.164567	-1.64793	0.0363636	0.111395	1		0.296533	3.07765	0	0	0
PID_CXCR4_PATHWAY	NA	310	153	NA	-0.132246	-1.47281	0.0643382	0.185625	1		0.266294	3.07351	0	0	0
REACTOME_RAB_GERANYLGERANYLATION	NA	39	154	NA	-0.284206	-2.45945	0	0.00464745	0.144		0.334842	3.0725	0	0	0
REACTOME_GLUCAGON_LIKE_PEPTIDE_1_GLP1_REGULATES_INSULIN_SECRETION	NA	265	155	NA	-0.228988	-1.56992	0.0452756	0.141248	1		0.406385	3.05108	0	0	0
REACTOME_ENDOSOMAL_SORTING_COMPLEX_REQUIRED_FOR_TRANSPORT_ESCRT	NA	89	156	NA	-0.332039	-2.09792	0.00194553	0.0245993	0.843		0.470627	3.0362	0	6.10872e-06	0.001
KEGG_PATHOGENIC_ESCHERICHIA_COLI_INFECTION	NA	86	157	NA	-0.267777	-2.10738	0.00199203	0.023822	0.824		0.363122	3.03062	0	6.08759e-06	0.001
KEGG_SNARE_INTERACTIONS_IN_VESICULAR_TRANSPORT	NA	139	158	NA	-0.270758	-1.87852	0.00814664	0.0557155	0.999		0.424447	3.02902	0	6.0666e-06	0.001
PID_P75_NTR_PATHWAY	NA	250	159	NA	-0.182358	-1.61118	0.0471513	0.123902	1		0.321808	3.02693	0	6.04575e-06	0.001
REACTOME_BUDDING_AND_MATURATION_OF_HIV_VIRION	NA	219	160	NA	-0.279205	-1.68309	0.027668	0.100721	1		0.490492	3.02635	0	6.02504e-06	0.001
REACTOME_SIGNALING_BY_EGFR	NA	114	161	NA	-0.257574	-2.01089	0.00204499	0.0324209	0.966		0.36493	3.02543	0	6.00448e-06	0.001
KEGG_VASOPRESSIN_REGULATED_WATER_REABSORPTION	NA	55	162	NA	-0.32238	-2.31459	0.00621118	0.0101014	0.387		0.400773	3.02374	0	5.98406e-06	0.001
REACTOME_PYRUVATE_METABOLISM_AND_CITRIC_ACID_TCA_CYCLE	NA	29	163	NA	-0.31759	-2.65159	0	0.00142666	0.036		0.363361	3.02171	0	1.19706e-05	0.002
PID_S1P_S1P2_PATHWAY	NA	202	164	NA	-0.300305	-1.72285	0.0162933	0.0890922	1		0.513488	3.01838	0	1.19301e-05	0.002
REACTOME_TRANSCRIPTIONAL_REGULATION_BY_RUNX2	NA	321	165	NA	-0.120696	-1.45379	0.0800781	0.194552	1		0.242031	3.01034	0	1.18501e-05	0.002
REACTOME_IRON_UPTAKE_AND_TRANSPORT	NA	35	166	NA	-0.331275	-2.52954	0	0.00319726	0.093		0.356218	3.00643	0	1.17711e-05	0.002
PID_INTEGRIN_A4B1_PATHWAY	NA	209	167	NA	-0.267021	-1.71124	0.0422535	0.091703	1		0.439839	3.0048	0	1.1732e-05	0.002
REACTOME_PINK_PARKIN_MEDIATED_MITOPHAGY	NA	169	168	NA	-0.346336	-1.81865	0.00782779	0.0643873	1		0.559369	3.00413	0	1.16545e-05	0.002
REACTOME_EXTRA_NUCLEAR_ESTROGEN_SIGNALING	NA	20	169	NA	-0.309352	-2.84675	0	0.000285973	0.005		0.300025	2.99211	0	1.14653e-05	0.002
BIOCARTA_BIOPEPTIDES_PATHWAY	NA	343	170	NA	-0.227647	-1.3983	0.10978	0.227885	1		0.464625	2.98963	0	1.14282e-05	0.002
KEGG_GAP_JUNCTION	NA	99	171	NA	-0.199541	-2.0654	0.00196464	0.0269724	0.898		0.288678	2.98928	0	1.13913e-05	0.002
KEGG_EPITHELIAL_CELL_SIGNALING_IN_HELICOBACTER_PYLORI_INFECTION	NA	113	172	NA	-0.222131	-2.01253	0.00631579	0.0322915	0.965		0.317415	2.98103	0	1.12105e-05	0.002
BIOCARTA_AT1R_PATHWAY	NA	60	173	NA	-0.371697	-2.26056	0.002	0.0128889	0.489		0.487135	2.96538	0	1.63212e-05	0.003
REACTOME_BETA_CATENIN_PHOSPHORYLATION_CASCADE	NA	258	174	NA	-0.311922	-1.58641	0.0578512	0.135103	1		0.58531	2.9534	0	1.60701e-05	0.003
REACTOME_CALNEXIN_CALRETICULIN_CYCLE	NA	292	175	NA	-0.258871	-1.50988	0.0702811	0.166944	1		0.49776	2.93893	0	2.12985e-05	0.004
REACTOME_RECYCLING_PATHWAY_OF_L1	NA	339	176	NA	-0.196442	-1.41179	0.0945674	0.218774	1		0.391648	2.93568	0	2.12336e-05	0.004
KEGG_TIGHT_JUNCTION	NA	77	177	NA	-0.186392	-2.16718	0	0.0180719	0.71		0.219482	2.92756	0	2.11691e-05	0.004
BIOCARTA_NDKDYNAMIN_PATHWAY	NA	244	178	NA	-0.336098	-1.624	0.0424242	0.119505	1		0.603195	2.91294	0	2.09148e-05	0.004
KEGG_RNA_POLYMERASE	NA	184	179	NA	-0.293821	-1.77861	0.0214844	0.0737441	1		0.460304	2.90091	0	2.06665e-05	0.004
PID_LIS1_PATHWAY	NA	230	180	NA	-0.26672	-1.65749	0.0337302	0.108428	1		0.467488	2.88079	0	2.03644e-05	0.004
KEGG_FATTY_ACID_METABOLISM	NA	280	181	NA	-0.22568	-1.53432	0.0492505	0.156922	1		0.401003	2.84603	0	2.50688e-05	0.005
REACTOME_CARGO_TRAFFICKING_TO_THE_PERICILIARY_MEMBRANE	NA	95	182	NA	-0.26263	-2.07633	0.00205339	0.0260187	0.878		0.334479	2.84001	0	2.49255e-05	0.005
REACTOME_CARGO_RECOGNITION_FOR_CLATHRIN_MEDIATED_ENDOCYTOSIS	NA	190	183	NA	-0.166373	-1.75856	0.0159046	0.0791461	1		0.241685	2.8397	0	2.48545e-05	0.005
REACTOME_DISORDERS_OF_TRANSMEMBRANE_TRANSPORTERS	NA	270	184	NA	-0.119709	-1.55812	0.0643939	0.146295	1		0.184953	2.83948	0	2.47839e-05	0.005
BIOCARTA_GPCR_PATHWAY	NA	138	185	NA	-0.303506	-1.88219	0.0121212	0.0549295	0.999		0.441488	2.8256	0	4.85075e-05	0.01
REACTOME_TRAFFICKING_OF_AMPA_RECEPTORS	NA	241	186	NA	-0.248068	-1.62939	0.0472441	0.118374	1		0.423141	2.82305	0	4.81033e-05	0.01
REACTOME_SYNTHESIS_OF_ACTIVE_UBIQUITIN_ROLES_OF_E1_AND_E2_ENZYMES	NA	143	187	NA	-0.296902	-1.87271	0.00192678	0.056441	0.999		0.440664	2.81924	0	5.23335e-05	0.011
REACTOME_MITOCHONDRIAL_CALCIUM_ION_TRANSPORT	NA	145	188	NA	-0.333433	-1.87019	0.00380228	0.0561879	0.999		0.50899	2.81694	0	5.66266e-05	0.012
REACTOME_INSULIN_PROCESSING	NA	251	189	NA	-0.288194	-1.60836	0.0494297	0.125248	1		0.497597	2.80187	0	6.01589e-05	0.013
PID_ER_NONGENOMIC_PATHWAY	NA	204	190	NA	-0.22836	-1.7193	0.0180361	0.0899111	1		0.366379	2.80059	0	5.99985e-05	0.013
REACTOME_MTORC1_MEDIATED_SIGNALLING	NA	318	191	NA	-0.256651	-1.45833	0.0761523	0.192286	1		0.491096	2.79913	0	5.98389e-05	0.013
REACTOME_ASSOCIATION_OF_TRIC_CCT_WITH_TARGET_PROTEINS_DURING_BIOSYNTHESIS	NA	327	192	NA	-0.207757	-1.44081	0.0938776	0.201217	1		0.396176	2.79703	0	5.96802e-05	0.013
REACTOME_SYNTHESIS_OF_PIPS_AT_THE_PLASMA_MEMBRANE	NA	172	193	NA	-0.220438	-1.81529	0.0161616	0.0644936	1		0.323391	2.78142	0	7.19722e-05	0.016
REACTOME_RHO_GTPASES_ACTIVATE_ROCKS	NA	330	194	NA	-0.27889	-1.43685	0.093254	0.203095	1		0.523246	2.77704	0	7.60407e-05	0.017
REACTOME_MRNA_CAPPING	NA	127	195	NA	-0.316536	-1.95078	0.00396825	0.0407124	0.987		0.442341	2.77495	0	7.58437e-05	0.017
REACTOME_CA_DEPENDENT_EVENTS	NA	288	196	NA	-0.217915	-1.51597	0.0630975	0.164949	1		0.39577	2.77033	0.00203666	7.56478e-05	0.017
PID_ENDOTHELIN_PATHWAY	NA	237	197	NA	-0.181638	-1.63885	0.0472441	0.11501	1		0.2966	2.75225	0	7.50659e-05	0.017
REACTOME_INTRAFLAGELLAR_TRANSPORT	NA	166	198	NA	-0.224997	-1.82282	0.0190476	0.0639042	1		0.324096	2.73811	0	9.11242e-05	0.02
REACTOME_CITRIC_ACID_CYCLE_TCA_CYCLE	NA	67	199	NA	-0.399776	-2.20953	0.00208333	0.0157659	0.605		0.487695	2.73659	0	9.52822e-05	0.02
REACTOME_SEALING_OF_THE_NUCLEAR_ENVELOPE_NE_BY_ESCRT_III	NA	75	200	NA	-0.371536	-2.17225	0	0.0179516	0.697		0.465353	2.73606	0	9.50428e-05	0.02
PID_ERBB1_INTERNALIZATION_PATHWAY	NA	333	201	NA	-0.19611	-1.43028	0.10325	0.207154	1		0.36576	2.73311	0	9.45676e-05	0.02
REACTOME_SIGNALLING_TO_ERKS	NA	300	202	NA	-0.221364	-1.48925	0.0721248	0.178401	1		0.392925	2.72907	0	0.000102243	0.022
REACTOME_SEMA3A_PAK_DEPENDENT_AXON_REPULSION	NA	203	203	NA	-0.355626	-1.71982	0.0174757	0.0900353	1		0.556094	2.71696	0	0.000112388	0.025
BIOCARTA_GLEEVEC_PATHWAY	NA	337	204	NA	-0.24933	-1.41673	0.110899	0.215698	1		0.468572	2.7167	0	0.000112115	0.025
BIOCARTA_NO1_PATHWAY	NA	353	205	NA	-0.24651	-1.38277	0.109731	0.2363	1		0.430652	2.70139	0	0.000118963	0.027
REACTOME_FORMATION_OF_TUBULIN_FOLDING_INTERMEDIATES_BY_CCT_TRIC	NA	30	206	NA	-0.521357	-2.63392	0.00423729	0.00173316	0.045		0.484606	2.69469	0	0.000118113	0.027
BIOCARTA_EDG1_PATHWAY	NA	76	207	NA	-0.38082	-2.16841	0.00193424	0.0181074	0.707		0.48255	2.69234	0	0.000126119	0.029
REACTOME_E3_UBIQUITIN_LIGASES_UBIQUITINATE_TARGET_PROTEINS	NA	253	208	NA	-0.211254	-1.60469	0.0289855	0.126562	1		0.358132	2.67598	0	0.000140338	0.033
KEGG_FOCAL_ADHESION	NA	338	209	NA	-0.0909563	-1.41607	0.0890688	0.215671	1		0.163007	2.67014	0	0.000139359	0.033
REACTOME_SYNTHESIS_OF_SUBSTRATES_IN_N_GLYCAN_BIOSYTHESIS	NA	341	210	NA	-0.160808	-1.4086	0.105263	0.220699	1		0.292911	2.66962	0	0.000142981	0.034
KEGG_PROTEIN_EXPORT	NA	226	211	NA	-0.303191	-1.66549	0.0275591	0.105882	1		0.496872	2.66642	0	0.000146555	0.035
REACTOME_DOWNSTREAM_SIGNAL_TRANSDUCTION	NA	309	212	NA	-0.230057	-1.47424	0.0977131	0.185093	1		0.411529	2.66285	0	0.000158555	0.038
REACTOME_RNA_POLYMERASE_III_CHAIN_ELONGATION	NA	246	213	NA	-0.315036	-1.61835	0.0276596	0.121883	1		0.506801	2.66061	0	0.000158189	0.038
REACTOME_COOPERATION_OF_PDCL_PHLP1_AND_TRIC_CCT_IN_G_PROTEIN_BETA_FOLDING	NA	32	214	NA	-0.370339	-2.57759	0	0.00221169	0.06		0.349788	2.65717	0	0.000169342	0.04
BIOCARTA_NFAT_PATHWAY	NA	133	215	NA	-0.257571	-1.90228	0.00610998	0.0513588	0.996		0.316618	2.64897	0	0.000178966	0.043
REACTOME_METABOLISM_OF_NITRIC_OXIDE_ENOS_ACTIVATION_AND_REGULATION	NA	261	216	NA	-0.348535	-1.5843	0.0458167	0.135026	1		0.554111	2.62588	0	0.000218463	0.054
REACTOME_RHO_GTPASES_ACTIVATE_PAKS	NA	351	217	NA	-0.253453	-1.38319	0.125506	0.237073	1		0.490681	2.62052	0	0.000221769	0.055
PID_THROMBIN_PAR1_PATHWAY	NA	256	218	NA	-0.213186	-1.59373	0.0457143	0.131843	1		0.346958	2.61496	0	0.000230571	0.058
PID_EPHB_FWD_PATHWAY	NA	248	219	NA	-0.220766	-1.61268	0.0257937	0.123988	1		0.354821	2.6104	0	0.000240966	0.061
REACTOME_LYSOSOME_VESICLE_BIOGENESIS	NA	150	220	NA	-0.285912	-1.84979	0.0169492	0.0608902	1		0.383239	2.58742	0	0.000270836	0.07
BIOCARTA_IGF1MTOR_PATHWAY	NA	336	221	NA	-0.280345	-1.42344	0.112595	0.210252	1		0.504386	2.58415	0	0.000273891	0.071
REACTOME_PLATELET_ACTIVATION_SIGNALING_AND_AGGREGATION	NA	16	222	NA	-0.1827	-2.94696	0	0.000138111	0.002		0.144133	2.57862	0	0.000275262	0.072
BIOCARTA_CREB_PATHWAY	NA	218	223	NA	-0.304887	-1.6895	0.0321285	0.0978947	1		0.47532	2.57756	0	0.000274673	0.072
REACTOME_G_ALPHA_Z_SIGNALLING_EVENTS	NA	255	224	NA	-0.221874	-1.59615	0.049904	0.130892	1		0.30904	2.55165	0	0.000312809	0.084
BIOCARTA_NOS1_PATHWAY	NA	144	225	NA	-0.3454	-1.87211	0.00594059	0.0562663	0.999		0.480856	2.54506	0	0.000315754	0.085
BIOCARTA_IGF1R_PATHWAY	NA	283	226	NA	-0.268052	-1.52804	0.0633663	0.159533	1		0.450872	2.54424	0	0.000315093	0.085
REACTOME_CTLA4_INHIBITORY_SIGNALING	NA	90	227	NA	-0.408123	-2.09609	0.0020284	0.0245959	0.844		0.470657	2.5392	0	0.000332475	0.09
REACTOME_VASOPRESSIN_REGULATES_RENAL_WATER_HOMEOSTASIS_VIA_AQUAPORINS	NA	281	228	NA	-0.223648	-1.53156	0.0665323	0.157894	1		0.332811	2.539	0	0.000335406	0.091
BIOCARTA_BARRESTIN_SRC_PATHWAY	NA	312	229	NA	-0.298613	-1.46759	0.0944123	0.188278	1		0.511677	2.52557	0	0.000363203	0.098
REACTOME_HIV_TRANSCRIPTION_INITIATION	NA	164	230	NA	-0.228584	-1.82557	0.00604839	0.0640176	1		0.317114	2.52024	0.00197628	0.000372365	0.101
REACTOME_SIGNALING_BY_FGFR_IN_DISEASE	NA	357	231	NA	-0.169766	-1.36749	0.125237	0.248475	1		0.271362	2.51656	0	0.000384378	0.105
PID_NEPHRIN_NEPH1_PATHWAY	NA	117	232	NA	-0.322007	-2.00314	0.00389105	0.0332288	0.968		0.383024	2.5007	0	0.000440533	0.122
REACTOME_G_PROTEIN_MEDIATED_EVENTS	NA	301	233	NA	-0.173873	-1.48385	0.0741483	0.182265	1		0.294154	2.49808	0	0.000441278	0.123
PID_PS1_PATHWAY	NA	354	234	NA	-0.189478	-1.3815	0.11284	0.236864	1		0.310262	2.48677	0	0.000456167	0.128
REACTOME_LEISHMANIA_INFECTION	NA	122	235	NA	-0.141009	-1.98039	0.002	0.0358879	0.976		0.138079	2.47054	0	0.000517144	0.144
REACTOME_SPRY_REGULATION_OF_FGF_SIGNALING	NA	229	236	NA	-0.350653	-1.66049	0.0272374	0.107271	1		0.497952	2.409	0	0.00079046	0.219
REACTOME_ER_QUALITY_CONTROL_COMPARTMENT_ERQC	NA	306	237	NA	-0.276343	-1.47764	0.0804124	0.183857	1		0.447603	2.40316	0	0.000833694	0.23
BIOCARTA_PAR1_PATHWAY	NA	322	238	NA	-0.289394	-1.44938	0.0742188	0.197742	1		0.454004	2.39505	0	0.00088992	0.241
REACTOME_TRAFFICKING_OF_GLUR2_CONTAINING_AMPA_RECEPTORS	NA	132	239	NA	-0.382802	-1.90557	0.00772201	0.0507439	0.996		0.481596	2.38569	0	0.00093811	0.253
BIOCARTA_GSK3_PATHWAY	NA	274	240	NA	-0.293276	-1.53954	0.068323	0.156222	1		0.438559	2.383	0	0.000959481	0.259
REACTOME_UPTAKE_AND_ACTIONS_OF_BACTERIAL_TOXINS	NA	298	241	NA	-0.240683	-1.4953	0.08	0.174641	1		0.369321	2.36512	0.0020202	0.00106264	0.287
BIOCARTA_IGF1_PATHWAY	NA	329	242	NA	-0.259661	-1.43937	0.0826613	0.201467	1		0.42732	2.34871	0	0.00119386	0.315
BIOCARTA_INSULIN_PATHWAY	NA	294	243	NA	-0.29064	-1.50895	0.0704501	0.166049	1		0.42053	2.34797	0	0.00119858	0.316
PID_PDGFRA_PATHWAY	NA	320	244	NA	-0.267149	-1.45427	0.0831683	0.194737	1		0.416419	2.3388	0	0.00128494	0.332
REACTOME_REGULATION_OF_PYRUVATE_DEHYDROGENASE_PDH_COMPLEX	NA	360	245	NA	-0.299556	-1.36578	0.125253	0.248366	1		0.476813	2.33274	0.00208333	0.0013533	0.348
REACTOME_ASSEMBLY_AND_CELL_SURFACE_PRESENTATION_OF_NMDA_RECEPTORS	NA	222	246	NA	-0.24238	-1.67382	0.0238095	0.103543	1		0.322024	2.33235	0	0.00135701	0.35
REACTOME_SIGNALING_BY_FGFR2_IIIA_TM	NA	165	247	NA	-0.349892	-1.82304	0.0126582	0.0641886	1		0.445924	2.3262	0	0.00140375	0.363
REACTOME_CLASS_I_PEROXISOMAL_MEMBRANE_PROTEIN_IMPORT	NA	88	248	NA	-0.398628	-2.099	0	0.024647	0.842		0.432962	2.27803	0.00419287	0.00187108	0.465
REACTOME_POTASSIUM_CHANNELS	NA	107	249	NA	-0.199872	-2.04513	0.00581395	0.0278546	0.933		0.194342	2.26898	0	0.00198858	0.485
REACTOME_BBSOME_MEDIATED_CARGO_TARGETING_TO_CILIUM	NA	63	250	NA	-0.407853	-2.23266	0.0041841	0.0145137	0.542		0.399768	2.26604	0.00194553	0.00201363	0.49
REACTOME_SIGNALING_BY_FGFR3	NA	235	251	NA	-0.250822	-1.64332	0.0316832	0.113557	1		0.310249	2.26391	0	0.00203154	0.494
KEGG_SPHINGOLIPID_METABOLISM	NA	79	252	NA	-0.310018	-2.15367	0	0.0192942	0.738		0.312198	2.26197	0	0.0020615	0.499
KEGG_PHOSPHATIDYLINOSITOL_SIGNALING_SYSTEM	NA	325	253	NA	-0.148135	-1.44327	0.0851927	0.200367	1		0.226515	2.25803	0	0.00210183	0.511
BIOCARTA_FCER1_PATHWAY	NA	136	254	NA	-0.263902	-1.88954	0.0159363	0.0534766	0.998		0.304436	2.2456	0.00203666	0.00224624	0.544
BIOCARTA_MCALPAIN_PATHWAY	NA	348	255	NA	-0.300997	-1.38997	0.0989899	0.232383	1		0.44148	2.23794	0	0.00233748	0.56
REACTOME_GABA_RECEPTOR_ACTIVATION	NA	34	256	NA	-0.311484	-2.54937	0	0.00260214	0.074		0.245928	2.23771	0.00391389	0.00233917	0.56
REACTOME_AGGREPHAGY	NA	257	257	NA	-0.237925	-1.59209	0.0482897	0.132353	1		0.304216	2.23039	0	0.00242414	0.574
REACTOME_CONSTITUTIVE_SIGNALING_BY_LIGAND_RESPONSIVE_EGFR_CANCER_VARIANTS	NA	304	258	NA	-0.292712	-1.48177	0.0664137	0.182234	1		0.421549	2.22771	0	0.00244987	0.577
KEGG_CALCIUM_SIGNALING_PATHWAY	NA	314	259	NA	-0.114547	-1.46239	0.0927419	0.191088	1		0.146314	2.22376	0	0.00249414	0.587
REACTOME_NEGATIVE_REGULATION_OF_MET_ACTIVITY	NA	236	260	NA	-0.321587	-1.6413	0.030426	0.114148	1		0.397539	2.22078	0.0019305	0.00253614	0.596
REACTOME_SYNTHESIS_OF_PIPS_AT_THE_EARLY_ENDOSOME_MEMBRANE	NA	129	261	NA	-0.410051	-1.92094	0.00838574	0.0474789	0.992		0.45656	2.20444	0	0.00279997	0.632
REACTOME_RHO_GTPASES_ACTIVATE_CIT	NA	344	262	NA	-0.259985	-1.39788	0.0826772	0.227755	1		0.419473	2.20204	0.00199203	0.00285389	0.64
REACTOME_CARGO_CONCENTRATION_IN_THE_ER	NA	179	263	NA	-0.290509	-1.78295	0.0233463	0.0739099	1		0.336711	2.19428	0.00192308	0.00295227	0.664
PID_S1P_META_PATHWAY	NA	159	264	NA	-0.362625	-1.83531	0.0137795	0.0625251	1		0.402247	2.19324	0.00604839	0.00296646	0.666
REACTOME_SIGNALING_BY_NTRK3_TRKC	NA	287	265	NA	-0.315014	-1.51867	0.062753	0.163978	1		0.439706	2.19247	0.00196464	0.00298536	0.672
REACTOME_SPHINGOLIPID_DE_NOVO_BIOSYNTHESIS	NA	151	266	NA	-0.26196	-1.84799	0.00384615	0.0610895	1		0.283957	2.18109	0	0.00317047	0.695
REACTOME_AQUAPORIN_MEDIATED_TRANSPORT	NA	277	267	NA	-0.223705	-1.53605	0.0694981	0.157223	1		0.25792	2.18002	0.00200803	0.00319702	0.701
PID_AJDISS_2PATHWAY	NA	208	268	NA	-0.225585	-1.71737	0.031746	0.0892121	1		0.27217	2.17578	0	0.00328109	0.711
REACTOME_REGULATION_OF_SIGNALING_BY_CBL	NA	323	269	NA	-0.265071	-1.44922	0.104536	0.197335	1		0.388952	2.16856	0.00198807	0.00341828	0.727
KEGG_VALINE_LEUCINE_AND_ISOLEUCINE_DEGRADATION	NA	110	270	NA	-0.277752	-2.02075	0.00383877	0.0313685	0.955		0.283821	2.16649	0	0.00345178	0.732
REACTOME_SIGNALING_BY_ERBB2_ECD_MUTANTS	NA	328	271	NA	-0.299622	-1.44055	0.0916335	0.20096	1		0.442214	2.16374	0.00198807	0.00353204	0.742
REACTOME_GABA_B_RECEPTOR_ACTIVATION	NA	115	272	NA	-0.290478	-2.0101	0.00588235	0.0323432	0.967		0.274018	2.15961	0	0.00362217	0.755
REACTOME_ACTIVATION_OF_AMPK_DOWNSTREAM_OF_NMDARS	NA	279	273	NA	-0.282189	-1.53449	0.0715746	0.157323	1		0.374209	2.15446	0.00200803	0.00374972	0.769
REACTOME_PYRUVATE_METABOLISM	NA	156	274	NA	-0.304941	-1.84069	0.0112994	0.0617139	1		0.335903	2.14252	0.00207039	0.00399051	0.797
BIOCARTA_LIS1_PATHWAY	NA	214	275	NA	-0.335705	-1.7024	0.0273973	0.0933428	1		0.423253	2.13335	0	0.00417694	0.815
REACTOME_SIGNALING_BY_FGFR1	NA	135	276	NA	-0.267646	-1.89058	0.0143149	0.0534539	0.997		0.25957	2.11088	0.00595238	0.00472523	0.865
REACTOME_SIGNALING_BY_ERBB4	NA	163	277	NA	-0.211338	-1.82782	0.014553	0.0636382	1		0.23546	2.10302	0.00395257	0.00493278	0.882
REACTOME_SIGNAL_AMPLIFICATION	NA	106	278	NA	-0.335558	-2.04665	0	0.0278868	0.93		0.304808	2.09673	0	0.00510551	0.892
REACTOME_METAL_ION_SLC_TRANSPORTERS	NA	181	279	NA	-0.335977	-1.78061	0.0157171	0.0740778	1		0.330244	2.08516	0.00596422	0.00546836	0.904
BIOCARTA_MEF2D_PATHWAY	NA	347	280	NA	-0.275152	-1.39032	0.135294	0.232601	1		0.39341	2.08408	0.00616016	0.00548166	0.906
KEGG_BASAL_TRANSCRIPTION_FACTORS	NA	267	281	NA	-0.230104	-1.56465	0.0515464	0.143853	1		0.299309	2.07897	0	0.00563484	0.912
KEGG_PEROXISOME	NA	198	282	NA	-0.180028	-1.7392	0.031185	0.0834806	1		0.201543	2.07265	0.00614754	0.00586822	0.92
REACTOME_FATTY_ACYL_COA_BIOSYNTHESIS	NA	146	283	NA	-0.303003	-1.85815	0.0116054	0.0596911	0.999		0.302678	2.07062	0	0.00593129	0.922
REACTOME_VEGFR2_MEDIATED_VASCULAR_PERMEABILITY	NA	302	284	NA	-0.244884	-1.48331	0.0675105	0.182157	1		0.331005	2.06791	0.00402414	0.00601226	0.924
BIOCARTA_CHREBP_PATHWAY	NA	215	285	NA	-0.361384	-1.7019	0.0234834	0.0931875	1		0.403769	2.06069	0	0.00625467	0.933
REACTOME_INSULIN_RECEPTOR_RECYCLING	NA	37	286	NA	-0.484878	-2.49302	0	0.00386559	0.116		0.343447	2.05057	0.0019685	0.00658139	0.943
REACTOME_VEGFR2_MEDIATED_CELL_PROLIFERATION	NA	317	287	NA	-0.280413	-1.45855	0.084	0.192616	1		0.397265	2.03748	0.00619835	0.00709401	0.952
REACTOME_COSTIMULATION_BY_THE_CD28_FAMILY	NA	201	288	NA	-0.217136	-1.72711	0.037182	0.0877157	1		0.225176	2.03328	0.00199203	0.00725448	0.957
REACTOME_SYNTHESIS_OF_PIPS_AT_THE_GOLGI_MEMBRANE	NA	102	289	NA	-0.430891	-2.05872	0	0.027152	0.912		0.406821	2.03234	0.00416667	0.00726061	0.957
REACTOME_GLYCOGEN_METABOLISM	NA	249	290	NA	-0.286902	-1.6115	0.0377734	0.124162	1		0.337882	2.03017	0.00404858	0.00730132	0.958
REACTOME_ADP_SIGNALLING_THROUGH_P2Y_PURINOCEPTOR_12	NA	59	291	NA	-0.470403	-2.29479	0	0.0106116	0.421		0.361671	2.02591	0.00391389	0.00748277	0.962
REACTOME_GASTRIN_CREB_SIGNALLING_PATHWAY_VIA_PKC_AND_MAPK	NA	291	292	NA	-0.322129	-1.51111	0.0587045	0.166446	1		0.388701	2.0234	0.0102041	0.00757894	0.963
KEGG_CARDIAC_MUSCLE_CONTRACTION	NA	182	293	NA	-0.216281	-1.77982	0.0213592	0.0740295	1		0.20254	2.02192	0.00204918	0.00762331	0.964
BIOCARTA_TCR_PATHWAY	NA	217	294	NA	-0.237997	-1.6906	0.0325866	0.0981961	1		0.248782	1.98749	0.00616016	0.0092893	0.98
REACTOME_SIALIC_ACID_METABOLISM	NA	228	295	NA	-0.265434	-1.66324	0.0311203	0.106316	1		0.2873	1.97991	0.00393701	0.00964931	0.984
REACTOME_GAMMA_CARBOXYLATION_HYPUSINE_FORMATION_AND_ARYLSULFATASE_ACTIVATION	NA	161	296	NA	-0.306766	-1.83176	0.0141129	0.0629997	1		0.280466	1.97196	0.0102249	0.010055	0.986
KEGG_LONG_TERM_DEPRESSION	NA	48	297	NA	-0.260461	-2.35533	0.00212766	0.00867647	0.3		0.205575	1.96809	0.00392927	0.0102581	0.986
KEGG_PROPANOATE_METABOLISM	NA	197	298	NA	-0.276231	-1.73987	0.0308642	0.0836098	1		0.302177	1.96805	0.00829876	0.0102467	0.986
REACTOME_RESPONSE_TO_ELEVATED_PLATELET_CYTOSOLIC_CA2	NA	31	299	NA	-0.227289	-2.62367	0	0.00179112	0.048		0.147469	1.96037	0.00422833	0.0106961	0.992
REACTOME_G_BETA_GAMMA_SIGNALLING_THROUGH_CDC42	NA	137	300	NA	-0.39307	-1.88754	0.0118577	0.0537129	0.999		0.359191	1.95585	0.00194932	0.0109517	0.992
REACTOME_THROMBIN_SIGNALLING_THROUGH_PROTEINASE_ACTIVATED_RECEPTORS_PARS	NA	108	301	NA	-0.342361	-2.02287	0.0039604	0.0315821	0.952		0.295353	1.9552	0.00579151	0.0109519	0.992
REACTOME_TIE2_SIGNALING	NA	155	302	NA	-0.396272	-1.84252	0.0185185	0.0614874	1		0.381133	1.95513	0.008	0.0109398	0.992
REACTOME_SIGNALING_BY_FGFR2_IN_DISEASE	NA	111	303	NA	-0.31475	-2.01979	0.00392157	0.0313167	0.957		0.245483	1.9435	0.0114943	0.0115456	0.994
REACTOME_PLATELET_HOMEOSTASIS	NA	41	304	NA	-0.259784	-2.45118	0	0.00466466	0.149		0.177503	1.92882	0.00623701	0.0124312	0.997
BIOCARTA_BCR_PATHWAY	NA	350	305	NA	-0.215618	-1.38574	0.0983936	0.235297	1		0.287637	1.92283	0.00988142	0.0127465	0.997
KEGG_GLUTATHIONE_METABOLISM	NA	272	306	NA	-0.21947	-1.54524	0.06639	0.153228	1		0.235249	1.91812	0.00967118	0.0130232	0.997
REACTOME_SIGNALING_BY_MET	NA	240	307	NA	-0.159911	-1.63187	0.0434783	0.117429	1		0.182665	1.91665	0.0105042	0.0131111	0.997
BIOCARTA_NGF_PATHWAY	NA	268	308	NA	-0.307286	-1.56031	0.0607843	0.145783	1		0.374605	1.90311	0.00770713	0.0141625	0.998
REACTOME_SIGNALING_BY_EGFR_IN_CANCER	NA	168	309	NA	-0.337267	-1.819	0.0181818	0.0645931	1		0.309958	1.89618	0.00796813	0.0146454	0.999
REACTOME_NEGATIVE_REGULATION_OF_THE_PI3K_AKT_NETWORK	NA	148	310	NA	-0.175042	-1.85645	0.0094162	0.059494	0.999		0.158535	1.89336	0.012	0.0148924	0.999
KEGG_REGULATION_OF_AUTOPHAGY	NA	73	311	NA	-0.413549	-2.17392	0	0.0182695	0.692		0.311006	1.8888	0.00213675	0.0151972	0.999
REACTOME_INTERACTION_BETWEEN_L1_AND_ANKYRINS	NA	176	312	NA	-0.29806	-1.80536	0.0178926	0.0665168	1		0.293077	1.88331	0.0101833	0.0156192	0.999
BIOCARTA_SPRY_PATHWAY	NA	207	313	NA	-0.346528	-1.71756	0.0251572	0.0894784	1		0.375601	1.88248	0.0141988	0.0156357	0.999
KEGG_OTHER_GLYCAN_DEGRADATION	NA	331	314	NA	-0.307406	-1.43498	0.11811	0.204222	1		0.395143	1.87888	0.0117647	0.0159155	0.999
REACTOME_NEUROTRANSMITTER_RELEASE_CYCLE	NA	104	315	NA	-0.267036	-2.05253	0.00196078	0.0276348	0.923		0.218461	1.86523	0.012474	0.0170239	1
REACTOME_BRANCHED_CHAIN_AMINO_ACID_CATABOLISM	NA	33	316	NA	-0.462952	-2.56982	0	0.00225828	0.063		0.335629	1.85955	0.02	0.0175341	1
REACTOME_THROMBOXANE_SIGNALLING_THROUGH_TP_RECEPTOR	NA	313	317	NA	-0.286577	-1.46661	0.0816733	0.188578	1		0.316199	1.85767	0.00790514	0.0177049	1
REACTOME_EGFR_DOWNREGULATION	NA	109	318	NA	-0.337019	-2.02197	0.00795229	0.0314639	0.953		0.273863	1.82843	0.00394477	0.0204547	1
REACTOME_SIGNALING_BY_FGFR4	NA	152	319	NA	-0.291345	-1.84766	0.00621118	0.060768	1		0.253729	1.82398	0.0238612	0.0209117	1
REACTOME_SIGNALING_BY_SCF_KIT	NA	345	320	NA	-0.193386	-1.39712	0.107843	0.227249	1		0.238228	1.81284	0.0143443	0.0220541	1
REACTOME_TRANSFERRIN_ENDOCYTOSIS_AND_RECYCLING	NA	72	321	NA	-0.399023	-2.17565	0.0019685	0.0182614	0.683		0.281565	1.78764	0.0223577	0.0249916	1
REACTOME_SIGNALING_BY_INSULIN_RECEPTOR	NA	53	322	NA	-0.276298	-2.33038	0	0.00947344	0.353		0.175988	1.7761	0.00954198	0.0262533	1
PID_ANGIOPOIETIN_RECEPTOR_PATHWAY	NA	316	323	NA	-0.19227	-1.4606	0.0957031	0.191485	1		0.213477	1.77508	0.0245399	0.0263367	1
REACTOME_FATTY_ACID_METABOLISM	NA	51	324	NA	-0.178007	-2.33847	0.00204918	0.00922338	0.335		0.1219	1.76337	0.0188679	0.0276899	1
REACTOME_GAP_JUNCTION_TRAFFICKING_AND_REGULATION	NA	49	325	NA	-0.370893	-2.34526	0.00413223	0.00928926	0.325		0.226547	1.75791	0.0139721	0.0284151	1
KEGG_BIOSYNTHESIS_OF_UNSATURATED_FATTY_ACIDS	NA	121	326	NA	-0.398451	-1.98151	0.0110092	0.0359785	0.976		0.340706	1.729	0.0179283	0.0327846	1
REACTOME_DETOXIFICATION_OF_REACTIVE_OXYGEN_SPECIES	NA	238	327	NA	-0.253614	-1.63574	0.0336134	0.116306	1		0.254047	1.72231	0.0213592	0.0338232	1
REACTOME_GLUTATHIONE_CONJUGATION	NA	290	328	NA	-0.24712	-1.51259	0.0558882	0.165926	1		0.247829	1.70144	0.0217391	0.0372907	1
PID_SYNDECAN_2_PATHWAY	NA	356	329	NA	-0.207677	-1.36969	0.137476	0.247541	1		0.250467	1.67392	0.0267686	0.0420108	1
REACTOME_NUCLEOBASE_CATABOLISM	NA	252	330	NA	-0.283158	-1.60508	0.0535373	0.126768	1		0.248723	1.66162	0.0301887	0.0443565	1
REACTOME_CELL_CELL_COMMUNICATION	NA	286	331	NA	-0.138016	-1.52135	0.077821	0.163052	1		0.125346	1.64427	0.0372549	0.0478354	1
REACTOME_ADP_SIGNALLING_THROUGH_P2Y_PURINOCEPTOR_1	NA	195	332	NA	-0.325567	-1.74541	0.0262626	0.0818529	1		0.271757	1.61176	0.0451745	0.0551719	1
REACTOME_PRESYNAPTIC_FUNCTION_OF_KAINATE_RECEPTORS	NA	319	333	NA	-0.293709	-1.4554	0.0746562	0.194262	1		0.292324	1.61152	0.0438095	0.0551624	1
REACTOME_ROS_AND_RNS_PRODUCTION_IN_PHAGOCYTES	NA	335	334	NA	-0.226764	-1.42402	0.107505	0.210329	1		0.225393	1.61051	0.0406977	0.0553748	1
REACTOME_INWARDLY_RECTIFYING_K_CHANNELS	NA	68	335	NA	-0.377639	-2.1965	0	0.0167566	0.629		0.226572	1.60149	0.0523139	0.0573077	1
BIOCARTA_PTEN_PATHWAY	NA	200	336	NA	-0.36571	-1.73146	0.0173745	0.0862671	1		0.313072	1.58965	0.0541586	0.0602437	1
REACTOME_GABA_SYNTHESIS_RELEASE_REUPTAKE_AND_DEGRADATION	NA	305	337	NA	-0.297724	-1.47827	0.0797665	0.183843	1		0.305453	1.58381	0.0557769	0.0618696	1
REACTOME_MISCELLANEOUS_TRANSPORT_AND_BINDING_EVENTS	NA	177	338	NA	-0.35423	-1.79626	0.0184049	0.0696122	1		0.260785	1.56136	0.0450098	0.0678423	1
REACTOME_NEGATIVE_REGULATION_OF_FGFR3_SIGNALING	NA	239	339	NA	-0.31562	-1.63397	0.0423077	0.11675	1		0.249671	1.55993	0.058	0.0682284	1
KEGG_ALANINE_ASPARTATE_AND_GLUTAMATE_METABOLISM	NA	247	340	NA	-0.29343	-1.61726	0.0323232	0.122091	1		0.23598	1.52049	0.0732673	0.0806631	1
REACTOME_CD28_CO_STIMULATION	NA	232	341	NA	-0.256069	-1.65099	0.030888	0.111128	1		0.224904	1.5192	0.0603622	0.0809727	1
REACTOME_G_PROTEIN_ACTIVATION	NA	100	342	NA	-0.389864	-2.06078	0.00609756	0.0272414	0.904		0.244738	1.51275	0.0687623	0.0827164	1
REACTOME_MITOCHONDRIAL_FATTY_ACID_BETA_OXIDATION	NA	142	343	NA	-0.279346	-1.87333	0.0059761	0.0566079	0.999		0.215301	1.50956	0.0708661	0.0838826	1
REACTOME_SYNTHESIS_OF_VERY_LONG_CHAIN_FATTY_ACYL_COAS	NA	188	344	NA	-0.336228	-1.75995	0.0201613	0.079745	1		0.252139	1.4931	0.0684105	0.0896987	1
REACTOME_CARBOXYTERMINAL_POST_TRANSLATIONAL_MODIFICATIONS_OF_TUBULIN	NA	273	345	NA	-0.240346	-1.54093	0.0711297	0.155739	1		0.213613	1.48584	0.0791075	0.0923242	1
REACTOME_CELL_SURFACE_INTERACTIONS_AT_THE_VASCULAR_WALL	NA	124	346	NA	-0.18149	-1.97412	0.00194932	0.0367983	0.979		0.116448	1.45165	0.0806754	0.106069	1
REACTOME_G_ALPHA_I_SIGNALLING_EVENTS	NA	131	347	NA	-0.118518	-1.91204	0.010352	0.0493792	0.995		0.0664263	1.43933	0.0956175	0.111407	1
REACTOME_ADHERENS_JUNCTIONS_INTERACTIONS	NA	170	348	NA	-0.289282	-1.81835	0.0163934	0.0641001	1		0.208906	1.4359	0.0871287	0.11259	1
REACTOME_GLUCAGON_TYPE_LIGAND_RECEPTORS	NA	192	349	NA	-0.352607	-1.75059	0.0215686	0.0813647	1		0.210109	1.41669	0.088	0.121232	1
PID_AMB2_NEUTROPHILS_PATHWAY	NA	289	350	NA	-0.230293	-1.51513	0.0847458	0.165042	1		0.192273	1.38839	0.108481	0.135053	1
KEGG_OLFACTORY_TRANSDUCTION	NA	293	351	NA	-0.302967	-1.50911	0.0606061	0.16695	1		0.223005	1.38098	0.114286	0.139103	1
REACTOME_GPVI_MEDIATED_ACTIVATION_CASCADE	NA	221	352	NA	-0.255193	-1.67384	0.0186335	0.103959	1		0.199367	1.38054	0.128631	0.139244	1
REACTOME_GLYOXYLATE_METABOLISM_AND_GLYCINE_DEGRADATION	NA	125	353	NA	-0.351309	-1.96795	0.00391389	0.0378179	0.979		0.204548	1.36592	0.120079	0.146952	1
REACTOME_NEGATIVE_REGULATION_OF_FGFR4_SIGNALING	NA	178	354	NA	-0.350732	-1.79022	0.0121704	0.0714169	1		0.206205	1.33388	0.143451	0.165291	1
KEGG_BUTANOATE_METABOLISM	NA	223	355	NA	-0.280832	-1.67192	0.0368932	0.104131	1		0.1958	1.31964	0.140952	0.173514	1
REACTOME_PEROXISOMAL_PROTEIN_IMPORT	NA	275	356	NA	-0.184998	-1.53895	0.0651341	0.156068	1		0.146583	1.31075	0.158482	0.178803	1
KEGG_O_GLYCAN_BIOSYNTHESIS	NA	303	357	NA	-0.261022	-1.4821	0.0989474	0.182546	1		0.20055	1.28833	0.156556	0.192943	1
REACTOME_DISEASES_OF_CARBOHYDRATE_METABOLISM	NA	299	358	NA	-0.244349	-1.49093	0.0811881	0.177631	1		0.189919	1.25706	0.186	0.214891	1
REACTOME_NEGATIVE_REGULATION_OF_FGFR1_SIGNALING	NA	191	359	NA	-0.334092	-1.7553	0.029703	0.0800977	1		0.18536	1.25244	0.194389	0.218188	1
KEGG_CELL_ADHESION_MOLECULES_CAMS	NA	326	360	NA	-0.146793	-1.44253	0.0961538	0.200421	1		0.10177	1.22781	0.202756	0.236939	1

## Sheet: c2cgp
	EZH2_KnockDown ranks		EZH2_Y641F ranks		EZH2_KnockDown						EZH2_Y641F
NAME	Rank EZH2_KD_positive	Rank EZH2_KD_negative	Rank EZH2_Y641_positive	Rank EZH2_Y641_negative	ES	NES	NOM p-val	FDR q-val	FWER p-val		ES	NES	NOM p-val	FDR q-val	FWER p-val
DUTERTRE_ESTRADIOL_RESPONSE_24HR_UP	1	NA	NA	7	0.357128	7.08318	0	0	0		-0.126891	-2.61306	0.00198807	0.001336	0.103
ROSTY_CERVICAL_CANCER_PROLIFERATION_CLUSTER	2	NA	NA	11	0.406009	5.3995	0	0	0		-0.169215	-2.27527	0.00396825	0.00739669	0.661
FLORIO_NEOCORTEX_BASAL_RADIAL_GLIA_DN	3	NA	NA	13	0.367995	5.35929	0	0	0		-0.142246	-2.16787	0.00384615	0.0146228	0.882
KONG_E2F3_TARGETS	4	NA	NA	10	0.461123	5.15271	0	0	0		-0.215159	-2.41017	0	0.00345529	0.342
KANG_DOXORUBICIN_RESISTANCE_UP	5	NA	NA	12	0.536533	4.37944	0	0	0		-0.25989	-2.19258	0.00201207	0.0127172	0.841
LEE_EARLY_T_LYMPHOCYTE_UP	6	NA	NA	25	0.387655	4.19351	0	0	0		-0.145539	-1.69182	0.0238095	0.120744	1
ZHOU_CELL_CYCLE_GENES_IN_IR_RESPONSE_24HR	7	NA	NA	23	0.325107	4.12941	0	0	0		-0.137841	-1.80217	0.0214008	0.0760379	1
CROONQUIST_NRAS_SIGNALING_DN	8	NA	NA	15	0.42742	4.06421	0	0	0		-0.216524	-2.05963	0.00416667	0.0249076	0.986
FRASOR_RESPONSE_TO_SERM_OR_FULVESTRANT_DN	9	NA	NA	22	0.514917	4.04155	0	0	0		-0.214523	-1.82837	0.00559702	0.0705611	1
GRAHAM_NORMAL_QUIESCENT_VS_NORMAL_DIVIDING_DN	10	NA	NA	21	0.372428	3.83814	0	0	0		-0.174914	-1.83992	0.0142276	0.0696033	1
ZHOU_CELL_CYCLE_GENES_IN_IR_RESPONSE_6HR	11	NA	NA	18	0.358766	3.74486	0	0	0		-0.184797	-1.93742	0.0158103	0.0456345	0.999
ZHAN_MULTIPLE_MYELOMA_PR_UP	12	NA	NA	19	0.490799	3.64476	0	0	0		-0.255386	-1.92658	0.01	0.0472441	1
MEISSNER_BRAIN_HCP_WITH_H3K27ME3	13	NA	NA	1	0.397864	3.50852	0	0	0		-0.451692	-8.44525	0	0	0
WHITFIELD_CELL_CYCLE_LITERATURE	14	NA	NA	14	0.437256	3.40482	0	0	0		-0.273313	-2.10644	0.00208768	0.0190483	0.96
FURUKAWA_DUSP6_TARGETS_PCI35_DN	15	NA	NA	29	0.362158	3.3269	0	0	0		-0.168492	-1.63739	0.0423077	0.143073	1
ISHIDA_E2F_TARGETS	16	NA	NA	26	0.39737	3.25047	0	0	0		-0.210471	-1.68634	0.0227743	0.121686	1
NADERI_BREAST_CANCER_PROGNOSIS_UP	17	NA	NA	28	0.411211	3.12767	0	0	0		-0.20083	-1.65755	0.0280561	0.135913	1
EGUCHI_CELL_CYCLE_RB1_TARGETS	18	NA	NA	30	0.560102	3.11783	0	1.44636e-05	0.001		-0.290642	-1.60472	0.0320513	0.161494	1
MOLENAAR_TARGETS_OF_CCND1_AND_CDK4_DN	19	NA	NA	27	0.35682	2.9734	0	0.000125234	0.01		-0.196033	-1.66359	0.0246914	0.133241	1
LY_AGING_MIDDLE_DN	20	NA	NA	31	0.50929	2.39925	0	0.0031616	0.367		-0.339471	-1.57951	0.0390144	0.175059	1
DUAN_PRDM5_TARGETS	21	NA	NA	34	0.253373	2.19834	0.00205339	0.0103618	0.849		-0.150496	-1.49063	0.0686275	0.229563	1
ANDERSEN_CHOLANGIOCARCINOMA_CLASS2	22	NA	NA	3	0.185789	2.05056	0.00851064	0.0226535	0.983		-0.209244	-3.00547	0	0.000115298	0.005
FARMER_BREAST_CANCER_CLUSTER_1	23	NA	NA	32	0.348836	1.94117	0.00790514	0.0376164	1		-0.222353	-1.57277	0.0468432	0.178948	1
POOLA_INVASIVE_BREAST_CANCER_UP	24	NA	NA	24	0.122613	1.93582	0.00790514	0.0380084	1		-0.0977175	-1.70705	0.0238569	0.114217	1
GAURNIER_PSMD4_TARGETS	25	NA	NA	20	0.323499	1.89782	0.00763359	0.0447923	1		-0.236315	-1.89813	0.00612245	0.0525867	1
HOLLERN_EMT_BREAST_TUMOR_DN	26	NA	NA	2	0.204971	1.87821	0.0101215	0.048695	1		-0.331263	-4.23389	0	0	0
SU_PANCREAS	27	NA	NA	33	0.350064	1.87328	0.00628931	0.0490784	1		-0.213982	-1.52327	0.0628803	0.204685	1
LIU_CDX2_TARGETS_UP	28	NA	NA	8	0.37035	1.80286	0.00790514	0.067702	1		-0.388667	-2.59479	0	0.00132099	0.113
KIM_ALL_DISORDERS_CALB1_CORR_DN	29	NA	NA	17	0.370275	1.70055	0.0261682	0.104084	1		-0.281203	-1.95335	0.00823045	0.0429875	0.999
MEISSNER_BRAIN_HCP_WITH_H3K4ME2_AND_H3K27ME3	30	NA	NA	4	0.311369	1.66768	0.0384615	0.118953	1		-0.318774	-2.81658	0	0.000341448	0.02
KLEIN_TARGETS_OF_BCR_ABL1_FUSION	31	NA	NA	36	0.251022	1.63479	0.0397614	0.133418	1		-0.197468	-1.4659	0.0795229	0.244158	1
SHEN_SMARCA2_TARGETS_DN	32	NA	NA	5	0.120199	1.61775	0.0353635	0.14066	1		-0.157501	-2.78437	0	0.000416621	0.027
MIKKELSEN_IPS_LCP_WITH_H3K4ME3	33	NA	NA	6	0.142536	1.58322	0.0631365	0.160573	1		-0.186393	-2.7715	0	0.00047811	0.034
BOSCO_TH1_CYTOTOXIC_MODULE	34	NA	NA	16	0.17901	1.57329	0.0372549	0.166383	1		-0.169734	-2.01455	0.00796813	0.031875	0.995
MOREAUX_MULTIPLE_MYELOMA_BY_TACI_UP	35	NA	NA	35	0.0900065	1.52895	0.0460922	0.189337	1		-0.0717723	-1.48915	0.0594059	0.229355	1
KIM_BIPOLAR_DISORDER_OLIGODENDROCYTE_DENSITY_CORR_DN	36	NA	NA	9	0.237989	1.48832	0.0707269	0.220376	1		-0.239435	-2.48281	0	0.00217091	0.217
MILI_PSEUDOPODIA_HAPTOTAXIS_UP	NA	1	2	NA	-0.277615	-6.77581	0	0	0		0.404313	9.94874	0	0	0
STARK_PREFRONTAL_CORTEX_22Q11_DELETION_DN	NA	2	1	NA	-0.266313	-6.42928	0	0	0		0.473519	11.7802	0	0	0
FLECHNER_BIOPSY_KIDNEY_TRANSPLANT_REJECTED_VS_OK_DN	NA	3	19	NA	-0.257509	-6.19117	0	0	0		0.270327	6.83825	0	0	0
SHEN_SMARCA2_TARGETS_UP	NA	4	3	NA	-0.249483	-5.80227	0	0	0		0.427449	9.88202	0	0	0
REN_ALVEOLAR_RHABDOMYOSARCOMA_DN	NA	5	13	NA	-0.235665	-5.33173	0	0	0		0.329226	7.51314	0	0	0
MOOTHA_PGC	NA	6	8	NA	-0.214119	-4.74794	0	0	0		0.356745	8.11606	0	0	0
BLALOCK_ALZHEIMERS_DISEASE_INCIPIENT_DN	NA	7	24	NA	-0.301268	-4.29015	0	0	0		0.449971	6.48794	0	0	0
WONG_MITOCHONDRIA_GENE_MODULE	NA	8	21	NA	-0.259303	-4.12127	0	0	0		0.404282	6.63915	0	0	0
YAO_TEMPORAL_RESPONSE_TO_PROGESTERONE_CLUSTER_13	NA	9	29	NA	-0.280155	-4.09474	0	0	0		0.433278	6.24715	0	0	0
LU_AGING_BRAIN_DN	NA	10	31	NA	-0.300682	-4.0911	0	0	0		0.44341	6.2267	0	0	0
LEE_TARGETS_OF_PTCH1_AND_SUFU_DN	NA	11	311	NA	-0.389497	-4.0423	0	0	0		0.256165	2.76288	0	8.07668e-05	0.031
WELCSH_BRCA1_TARGETS_UP	NA	12	45	NA	-0.257886	-3.89708	0	0	0		0.362158	5.64628	0	0	0
MOOTHA_HUMAN_MITODB_6_2002	NA	13	7	NA	-0.176393	-3.8319	0	0	0		0.352368	8.14581	0	0	0
ALONSO_METASTASIS_UP	NA	14	34	NA	-0.257061	-3.79707	0	0	0		0.396691	6.09708	0	0	0
ONKEN_UVEAL_MELANOMA_DN	NA	15	10	NA	-0.150161	-3.78295	0	0	0		0.311426	7.81829	0	0	0
HSIAO_HOUSEKEEPING_GENES	NA	16	11	NA	-0.180409	-3.73371	0	0	0		0.362293	7.75115	0	0	0
MOOTHA_MITOCHONDRIA	NA	17	9	NA	-0.168478	-3.63819	0	0	0		0.345226	8.07512	0	0	0
LU_AGING_BRAIN_UP	NA	18	82	NA	-0.204083	-3.61271	0	0	0		0.269968	4.85423	0	0	0
BAELDE_DIABETIC_NEPHROPATHY_DN	NA	19	26	NA	-0.160315	-3.56798	0	0	0		0.278562	6.45544	0	0	0
MIKKELSEN_NPC_ICP_WITH_H3K4ME3	NA	20	39	NA	-0.164899	-3.5456	0	0	0		0.254848	5.89928	0	0	0
WANG_TUMOR_INVASIVENESS_UP	NA	21	5	NA	-0.160125	-3.49114	0	0	0		0.378625	8.31375	0	0	0
BERENJENO_TRANSFORMED_BY_RHOA_DN	NA	22	41	NA	-0.160606	-3.39037	0	0	0		0.256417	5.84304	0	0	0
LAIHO_COLORECTAL_CANCER_SERRATED_UP	NA	23	61	NA	-0.288695	-3.36315	0	0	0		0.438126	5.23192	0	0	0
JOHANSSON_BRAIN_CANCER_EARLY_VS_LATE_DN	NA	24	206	NA	-0.441858	-3.30627	0	0	0		0.459485	3.42284	0	0	0
VERHAAK_GLIOBLASTOMA_NEURAL	NA	25	123	NA	-0.276091	-3.27303	0	0	0		0.346371	4.3245	0	0	0
ONDER_CDH1_TARGETS_2_UP	NA	26	266	NA	-0.185426	-3.27216	0	0	0		0.166631	3.01605	0	3.1786e-06	0.001
BORCZUK_MALIGNANT_MESOTHELIOMA_UP	NA	27	12	NA	-0.168022	-3.25224	0	0	0		0.399639	7.69484	0	0	0
PICCALUGA_ANGIOIMMUNOBLASTIC_LYMPHOMA_UP	NA	28	246	NA	-0.212952	-3.19736	0	0	0		0.200634	3.19162	0	0	0
MODY_HIPPOCAMPUS_POSTNATAL	NA	29	126	NA	-0.368103	-3.18837	0	0	0		0.477618	4.29989	0	0	0
KAAB_HEART_ATRIUM_VS_VENTRICLE_DN	NA	34	95	NA	-0.186043	-3.17177	0	4.00129e-05	0.001		0.264235	4.75054	0	0	0
VECCHI_GASTRIC_CANCER_EARLY_DN	NA	33	439	NA	-0.181957	-3.13753	0	3.87625e-05	0.001		0.0878255	1.81385	0.0124224	0.0250248	1
JIANG_AGING_HYPOTHALAMUS_DN	NA	32	138	NA	-0.458248	-3.12721	0	3.75879e-05	0.001		0.611407	4.13313	0	0	0
LI_WILMS_TUMOR_VS_FETAL_KIDNEY_1_UP	NA	31	155	NA	-0.212789	-3.08795	0	3.64824e-05	0.001		0.256092	3.95774	0	0	0
DAVICIONI_TARGETS_OF_PAX_FOXO1_FUSIONS_UP	NA	30	225	NA	-0.183217	-3.08185	0	3.44556e-05	0.001		0.182471	3.30158	0	0	0
PELLICCIOTTA_HDAC_IN_ANTIGEN_PRESENTATION_UP	NA	35	104	NA	-0.336519	-3.04777	0	9.83731e-05	0.003		0.49283	4.66601	0	0	0
CREIGHTON_ENDOCRINE_THERAPY_RESISTANCE_5	NA	40	37	NA	-0.135759	-3.01605	0	0.000127897	0.004		0.246531	6.0014	0	0	0
APPEL_IMATINIB_RESPONSE	NA	39	308	NA	-0.452543	-3.00606	0	0.000124699	0.004		0.402549	2.77641	0	7.68459e-05	0.029
MOOTHA_VOXPHOS	NA	38	87	NA	-0.314789	-3.00549	0	0.000121658	0.004		0.500679	4.82971	0	0	0
COLIN_PILOCYTIC_ASTROCYTOMA_VS_GLIOBLASTOMA_UP	NA	37	224	NA	-0.461713	-2.98047	0	0.000118761	0.004		0.507799	3.30644	0	0	0
JIANG_AGING_CEREBRAL_CORTEX_DN	NA	36	158	NA	-0.363452	-2.97876	0	0.000115999	0.004		0.491226	3.93279	0	0	0
WANG_SMARCE1_TARGETS_UP	NA	42	304	NA	-0.171479	-2.96383	0	0.000199669	0.007		0.149052	2.78802	0	6.98025e-05	0.026
THUM_SYSTOLIC_HEART_FAILURE_UP	NA	41	67	NA	-0.143942	-2.95696	0	0.000195232	0.007		0.229781	5.08046	0	0	0
SCHUETZ_BREAST_CANCER_DUCTAL_INVASIVE_UP	NA	48	264	NA	-0.154044	-2.94718	0	0.000239079	0.009		0.149356	3.05071	0	0	0
MCCLUNG_CREB1_TARGETS_UP	NA	47	99	NA	-0.274667	-2.94597	0	0.000234099	0.009		0.41774	4.70323	0	0	0
WANG_LMO4_TARGETS_DN	NA	46	18	NA	-0.143918	-2.93849	0	0.000229321	0.009		0.335908	6.89774	0	0	0
DELYS_THYROID_CANCER_UP	NA	45	371	NA	-0.141726	-2.92281	0	0.000224735	0.009		0.0995916	2.30675	0	0.00175004	0.606
RIGGINS_TAMOXIFEN_RESISTANCE_DN	NA	44	163	NA	-0.192511	-2.91707	0	0.000220328	0.009		0.229706	3.87845	0	0	0
MARTORIATI_MDM4_TARGETS_NEUROEPITHELIUM_DN	NA	43	159	NA	-0.223999	-2.90786	0	0.000216091	0.009		0.27236	3.90452	0	0	0
BURTON_ADIPOGENESIS_6	NA	50	170	NA	-0.204299	-2.89339	0	0.000282755	0.012		0.242598	3.7833	0	0	0
RAGHAVACHARI_PLATELET_SPECIFIC_GENES	NA	49	254	NA	-0.327934	-2.88854	0	0.000277519	0.012		0.341813	3.13759	0	0	0
AZARE_NEOPLASTIC_TRANSFORMATION_BY_STAT3_UP	NA	51	363	NA	-0.254731	-2.86153	0	0.000295845	0.013		0.186524	2.34722	0.00195312	0.00135567	0.502
KYNG_ENVIRONMENTAL_STRESS_RESPONSE_UP	NA	52	295	NA	-0.366427	-2.85282	0	0.000335808	0.015		0.340689	2.82018	0	5.8351e-05	0.021
LANDIS_ERBB2_BREAST_TUMORS_324_DN	NA	53	271	NA	-0.219858	-2.8511	0	0.000351696	0.016		0.211631	2.94465	0	2.17174e-05	0.007
VECCHI_GASTRIC_CANCER_ADVANCED_VS_EARLY_UP	NA	54	456	NA	-0.202932	-2.8315	0	0.000360385	0.016		0.115962	1.70232	0.0294695	0.0414035	1
LANDIS_ERBB2_BREAST_TUMORS_65_DN	NA	58	326	NA	-0.426393	-2.82945	0	0.000375052	0.017		0.365516	2.62121	0	0.000194469	0.079
GOTZMANN_EPITHELIAL_TO_MESENCHYMAL_TRANSITION_DN	NA	56	229	NA	-0.190167	-2.82753	0	0.000368904	0.017		0.208452	3.28868	0	0	0
BARRIER_COLON_CANCER_RECURRENCE_UP	NA	55	384	NA	-0.40271	-2.82724	0	0.000362954	0.017		0.299216	2.20341	0.00201207	0.00329912	0.849
LEIN_OLIGODENDROCYTE_MARKERS	NA	59	88	NA	-0.296896	-2.82285	0	0.000376718	0.018		0.482216	4.80854	0	0	0
RUTELLA_RESPONSE_TO_HGF_VS_CSF2RB_AND_IL4_UP	NA	57	51	NA	-0.137727	-2.82078	0	0.000370832	0.018		0.246124	5.45431	0	0	0
HOSHIDA_LIVER_CANCER_SUBCLASS_S3	NA	60	514	NA	-0.182394	-2.81825	0	0.000384258	0.019		0.0696836	1.25892	0.171937	0.224532	1
STEIN_ESRRA_TARGETS_UP	NA	61	25	NA	-0.137991	-2.80465	0	0.000397167	0.02		0.301832	6.48002	0	0	0
SEIDEN_ONCOGENESIS_BY_MET	NA	66	124	NA	-0.271402	-2.79492	0	0.000465336	0.024		0.409472	4.304	0	0	0
SWEET_LUNG_CANCER_KRAS_UP	NA	63	77	NA	-0.129323	-2.78956	0	0.000458492	0.024		0.20747	4.89569	0	0	0
MARTINEZ_RESPONSE_TO_TRABECTEDIN_UP	NA	68	221	NA	-0.307589	-2.7885	0	0.000469529	0.025		0.350016	3.3157	0	0	0
GRUETZMANN_PANCREATIC_CANCER_DN	NA	65	167	NA	-0.190544	-2.78555	0	0.000462822	0.025		0.245752	3.83418	0	0	0
YAO_TEMPORAL_RESPONSE_TO_PROGESTERONE_CLUSTER_17	NA	62	20	NA	-0.182765	-2.78415	0	0.000456303	0.025		0.440465	6.65824	0	0	0
KIM_ALL_DISORDERS_DURATION_CORR_DN	NA	67	28	NA	-0.2075	-2.78124	0	0.000467804	0.026		0.451513	6.26497	0	0	0
ENK_UV_RESPONSE_KERATINOCYTE_DN	NA	64	4	NA	-0.11687	-2.78019	0	0.000461395	0.026		0.350579	8.62416	0	0	0
YOSHIMURA_MAPK8_TARGETS_DN	NA	69	17	NA	-0.137401	-2.75356	0	0.000500034	0.029		0.330797	6.99467	0	0	0
ROY_WOUND_BLOOD_VESSEL_UP	NA	70	490	NA	-0.349886	-2.74121	0	0.000542929	0.032		0.190097	1.47665	0.089613	0.103646	1
GAVIN_FOXP3_TARGETS_CLUSTER_T4	NA	73	360	NA	-0.270029	-2.73808	0	0.00056807	0.033		0.220376	2.35726	0	0.00127404	0.481
SEIDEN_MET_SIGNALING	NA	72	317	NA	-0.545743	-2.73743	0	0.000560787	0.033		0.519229	2.70994	0	9.87689e-05	0.038
WATANABE_RECTAL_CANCER_RADIOTHERAPY_RESPONSIVE_DN	NA	71	211	NA	-0.260961	-2.72834	0	0.000553688	0.033		0.316714	3.3802	0	0	0
YAO_TEMPORAL_RESPONSE_TO_PROGESTERONE_CLUSTER_10	NA	74	93	NA	-0.29232	-2.71199	0	0.000719089	0.044		0.500435	4.75883	0	0	0
MONNIER_POSTRADIATION_TUMOR_ESCAPE_DN	NA	75	78	NA	-0.133543	-2.696	0	0.000865434	0.054		0.226825	4.89301	0	0	0
LEIN_NEURON_MARKERS	NA	77	58	NA	-0.28076	-2.69297	0	0.000902199	0.057		0.543491	5.27726	0	0	0
SPIRA_SMOKERS_LUNG_CANCER_UP	NA	76	370	NA	-0.402632	-2.69108	0	0.000891329	0.057		0.327111	2.31623	0.00190476	0.00162675	0.58
DING_LUNG_CANCER_EXPRESSION_BY_COPY_NUMBER	NA	78	109	NA	-0.240135	-2.68257	0	0.000925926	0.06		0.413264	4.63112	0	0	0
SENESE_HDAC3_TARGETS_UP	NA	80	32	NA	-0.115715	-2.66876	0	0.000989087	0.065		0.256323	6.16764	0	0	0
CHARAFE_BREAST_CANCER_LUMINAL_VS_BASAL_DN	NA	79	108	NA	-0.124708	-2.66762	0	0.000977586	0.065		0.200559	4.6489	0	0	0
SCHAEFFER_PROSTATE_DEVELOPMENT_6HR_UP	NA	81	228	NA	-0.206854	-2.6592	0	0.000995009	0.067		0.240586	3.2889	0	0	0
SWEET_LUNG_CANCER_KRAS_DN	NA	82	306	NA	-0.130661	-2.62161	0	0.00112598	0.078		0.125483	2.78043	0	7.4544e-05	0.028
GOLDRATH_HOMEOSTATIC_PROLIFERATION	NA	83	83	NA	-0.200679	-2.62075	0	0.00112702	0.079		0.365483	4.85227	0	0	0
RUTELLA_RESPONSE_TO_HGF_UP	NA	84	53	NA	-0.123176	-2.59947	0	0.00129185	0.092		0.242598	5.4169	0	0	0
BAE_BRCA1_TARGETS_UP	NA	85	323	NA	-0.278444	-2.5853	0	0.00143907	0.103		0.279669	2.63035	0.00199203	0.000189477	0.076
WAMUNYOKOLI_OVARIAN_CANCER_LMP_DN	NA	86	177	NA	-0.172703	-2.58251	0	0.00146365	0.106		0.246947	3.70108	0	0	0
PASINI_SUZ12_TARGETS_DN	NA	87	68	NA	-0.13879	-2.57138	0	0.00150013	0.11		0.252828	5.0407	0	0	0
FRASOR_RESPONSE_TO_SERM_OR_FULVESTRANT_UP	NA	88	436	NA	-0.498386	-2.56423	0	0.00154951	0.115		0.328922	1.83429	0.0166667	0.0226397	1
GRUETZMANN_PANCREATIC_CANCER_UP	NA	89	66	NA	-0.127228	-2.56261	0	0.00157154	0.118		0.244165	5.1098	0	0	0
DANG_REGULATED_BY_MYC_DN	NA	90	100	NA	-0.148962	-2.55144	0	0.00169638	0.128		0.261126	4.70025	0	0	0
LEIN_ASTROCYTE_MARKERS	NA	91	307	NA	-0.359522	-2.54827	0	0.00170485	0.13		0.381568	2.77955	0	7.44259e-05	0.028
SWEET_KRAS_ONCOGENIC_SIGNATURE	NA	92	287	NA	-0.250792	-2.54167	0	0.00173712	0.134		0.259688	2.85366	0	5.46842e-05	0.019
RICKMAN_TUMOR_DIFFERENTIATED_WELL_VS_POORLY_DN	NA	93	162	NA	-0.134101	-2.538	0	0.0017897	0.141		0.178805	3.88622	0	0	0
ZHONG_SECRETOME_OF_LUNG_CANCER_AND_FIBROBLAST	NA	94	150	NA	-0.208079	-2.53412	0	0.00182128	0.145		0.304655	4.00392	0	0	0
SANA_RESPONSE_TO_IFNG_DN	NA	95	156	NA	-0.24532	-2.53142	0	0.00187562	0.15		0.374963	3.95075	0	0	0
VERRECCHIA_EARLY_RESPONSE_TO_TGFB1	NA	96	422	NA	-0.287935	-2.49155	0	0.00261975	0.201		0.219413	1.91173	0.0120482	0.0156361	1
KIM_MYC_AMPLIFICATION_TARGETS_UP	NA	97	119	NA	-0.165461	-2.47618	0	0.00293487	0.225		0.276886	4.40389	0	0	0
FARMER_BREAST_CANCER_APOCRINE_VS_LUMINAL	NA	99	215	NA	-0.139024	-2.47201	0	0.00300011	0.232		0.169472	3.36153	0	0	0
BURTON_ADIPOGENESIS_8	NA	98	283	NA	-0.248314	-2.47105	0	0.00297233	0.232		0.287483	2.88406	0	3.54054e-05	0.012
TIEN_INTESTINE_PROBIOTICS_24HR_DN	NA	100	73	NA	-0.157988	-2.4453	0	0.00368796	0.285		0.306101	4.9484	0	0	0
HIRSCH_CELLULAR_TRANSFORMATION_SIGNATURE_UP	NA	101	169	NA	-0.150964	-2.43853	0	0.00379115	0.294		0.218647	3.79394	0	0	0
SASSON_RESPONSE_TO_GONADOTROPHINS_UP	NA	102	260	NA	-0.237544	-2.43632	0	0.0038132	0.297		0.282523	3.1113	0	0	0
RODWELL_AGING_KIDNEY_NO_BLOOD_DN	NA	105	212	NA	-0.1912	-2.42949	0	0.00409204	0.315		0.249668	3.36959	0	0	0
RUIZ_TNC_TARGETS_UP	NA	104	327	NA	-0.182292	-2.4283	0	0.00407746	0.317		0.188237	2.61431	0	0.000208544	0.085
BILANGES_RAPAMYCIN_SENSITIVE_VIA_TSC1_AND_TSC2	NA	103	151	NA	-0.261488	-2.42634	0	0.00406373	0.318		0.426306	3.9942	0	0	0
WAKABAYASHI_ADIPOGENESIS_PPARG_RXRA_BOUND_WITH_H4K20ME1_MARK	NA	108	166	NA	-0.173112	-2.41706	0	0.00423127	0.333		0.281504	3.83496	0	0	0
NADLER_OBESITY_UP	NA	107	301	NA	-0.283155	-2.41681	0	0.00420562	0.334		0.313612	2.80243	0	6.24319e-05	0.023
DAZARD_RESPONSE_TO_UV_SCC_UP	NA	106	273	NA	-0.221437	-2.41665	0	0.00416997	0.334		0.258791	2.9268	0	2.14415e-05	0.007
PODAR_RESPONSE_TO_ADAPHOSTIN_UP	NA	110	148	NA	-0.192977	-2.41249	0.00192678	0.00427102	0.344		0.30615	4.0405	0	0	0
HAN_SATB1_TARGETS_UP	NA	109	60	NA	-0.113364	-2.40972	0	0.00426657	0.346		0.234456	5.23865	0	0	0
VIETOR_IFRD1_TARGETS	NA	111	495	NA	-0.504002	-2.40731	0	0.00431405	0.349		0.264807	1.44509	0.0923077	0.116423	1
RAO_BOUND_BY_SALL4_ISOFORM_A	NA	112	332	NA	-0.18502	-2.40012	0	0.00461625	0.373		0.180023	2.5928	0	0.000245559	0.102
TOOKER_GEMCITABINE_RESISTANCE_DN	NA	113	157	NA	-0.202534	-2.39342	0	0.0048433	0.39		0.317141	3.9476	0	0	0
KAYO_CALORIE_RESTRICTION_MUSCLE_UP	NA	114	397	NA	-0.234714	-2.39054	0	0.00486589	0.396		0.188718	2.07218	0.002	0.00683514	0.987
HOWLIN_CITED1_TARGETS_1_DN	NA	115	410	NA	-0.368887	-2.3808	0.00200803	0.00514509	0.414		0.28197	1.96269	0.00204918	0.0120944	1
SESTO_RESPONSE_TO_UV_C0	NA	116	154	NA	-0.210984	-2.37799	0	0.00520323	0.42		0.343121	3.97245	0	0	0
DE_YY1_TARGETS_DN	NA	117	142	NA	-0.219398	-2.37605	0.00196464	0.00524067	0.424		0.360871	4.07308	0	0	0
BURTON_ADIPOGENESIS_5	NA	118	164	NA	-0.204203	-2.36124	0	0.00579118	0.461		0.322738	3.85415	0	0	0
CHIANG_LIVER_CANCER_SUBCLASS_UNANNOTATED_DN	NA	119	49	NA	-0.155542	-2.35636	0	0.00591995	0.47		0.352572	5.52022	0	0	0
BRUECKNER_TARGETS_OF_MIRLET7A3_DN	NA	120	321	NA	-0.253637	-2.35208	0	0.00599866	0.473		0.276456	2.68455	0	0.000118996	0.047
ZHONG_SECRETOME_OF_LUNG_CANCER_AND_MACROPHAGE	NA	121	268	NA	-0.242765	-2.34849	0	0.00609375	0.476		0.304925	3.00671	0	3.16654e-06	0.001
MORI_PLASMA_CELL_UP	NA	122	289	NA	-0.293378	-2.33994	0	0.00640347	0.501		0.337593	2.84029	0	5.68984e-05	0.02
IWANAGA_CARCINOGENESIS_BY_KRAS_UP	NA	125	274	NA	-0.179424	-2.33545	0.00206186	0.00656068	0.513		0.20416	2.92003	0	2.73439e-05	0.009
LANDIS_BREAST_CANCER_PROGRESSION_DN	NA	124	489	NA	-0.254151	-2.33514	0.0019802	0.00652174	0.514		0.153188	1.48601	0.0712871	0.100183	1
ENK_UV_RESPONSE_KERATINOCYTE_UP	NA	123	84	NA	-0.103733	-2.33474	0.0020284	0.00647414	0.514		0.191024	4.84745	0	0	0
BOUDOUKHA_BOUND_BY_IGF2BP2	NA	126	149	NA	-0.209895	-2.32171	0	0.00704581	0.544		0.341558	4.02234	0	0	0
KARLSSON_TGFB1_TARGETS_DN	NA	127	81	NA	-0.151399	-2.31253	0	0.00735431	0.566		0.30544	4.85489	0	0	0
IGLESIAS_E2F_TARGETS_UP	NA	128	234	NA	-0.185008	-2.30774	0	0.00765498	0.585		0.249725	3.24468	0	0	0
MCCLUNG_DELTA_FOSB_TARGETS_8WK	NA	129	140	NA	-0.286552	-2.29992	0	0.00804998	0.6		0.508811	4.10588	0	0	0
SUNG_METASTASIS_STROMA_UP	NA	130	217	NA	-0.200867	-2.2959	0.00574713	0.00828143	0.612		0.282961	3.34938	0	0	0
KAAB_HEART_ATRIUM_VS_VENTRICLE_UP	NA	131	310	NA	-0.135735	-2.29442	0.00213675	0.00829291	0.614		0.154536	2.7654	0	8.12724e-05	0.031
LENAOUR_DENDRITIC_CELL_MATURATION_UP	NA	132	351	NA	-0.209247	-2.29325	0	0.0083309	0.617		0.205114	2.41839	0	0.000806147	0.329
SCHLOSSER_MYC_TARGETS_REPRESSED_BY_SERUM	NA	133	47	NA	-0.166044	-2.28221	0	0.00881886	0.639		0.405557	5.54142	0	0	0
LEI_MYB_TARGETS	NA	134	153	NA	-0.127723	-2.28076	0.00196464	0.00886865	0.645		0.204272	3.97894	0	0	0
BONOME_OVARIAN_CANCER_POOR_SURVIVAL_UP	NA	136	372	NA	-0.354033	-2.27697	0.00192678	0.00896674	0.652		0.35438	2.30518	0	0.00176683	0.608
LE_EGR2_TARGETS_DN	NA	135	240	NA	-0.209386	-2.27493	0	0.00896572	0.654		0.2809	3.23178	0	0	0
PAPASPYRIDONOS_UNSTABLE_ATEROSCLEROTIC_PLAQUE_UP	NA	137	325	NA	-0.285457	-2.26622	0	0.00933006	0.681		0.31409	2.62447	0	0.000192898	0.078
WINTER_HYPOXIA_METAGENE	NA	138	192	NA	-0.140421	-2.26099	0	0.00958105	0.693		0.207742	3.53343	0	0	0
YAO_TEMPORAL_RESPONSE_TO_PROGESTERONE_CLUSTER_12	NA	139	299	NA	-0.223357	-2.25249	0.00396825	0.0100552	0.709		0.275863	2.81342	0	6.3146e-05	0.023
YAO_TEMPORAL_RESPONSE_TO_PROGESTERONE_CLUSTER_0	NA	140	341	NA	-0.235387	-2.24968	0.0039604	0.0102673	0.719		0.258584	2.49716	0	0.000457359	0.186
JISON_SICKLE_CELL_DISEASE_UP	NA	141	196	NA	-0.159132	-2.2412	0.00619835	0.0108476	0.741		0.234928	3.49221	0	0	0
DAVICIONI_RHABDOMYOSARCOMA_PAX_FOXO1_FUSION_UP	NA	142	336	NA	-0.255854	-2.23858	0.00204499	0.0109142	0.747		0.280749	2.55654	0	0.000324205	0.133
STEIN_ESRRA_TARGETS	NA	143	16	NA	-0.0949176	-2.23294	0.00199601	0.0113299	0.756		0.289823	7.09121	0	0	0
BOYAULT_LIVER_CANCER_SUBCLASS_G1_DN	NA	146	277	NA	-0.343822	-2.23073	0	0.0114091	0.76		0.426293	2.90391	0	2.70993e-05	0.009
TAKAO_RESPONSE_TO_UVB_RADIATION_UP	NA	144	91	NA	-0.223616	-2.23009	0	0.0113924	0.762		0.458968	4.78402	0	0	0
GAUSSMANN_MLL_AF4_FUSION_TARGETS_E_UP	NA	145	390	NA	-0.209264	-2.22818	0	0.0114054	0.767		0.192804	2.1744	0.00196464	0.00383224	0.901
SENGUPTA_NASOPHARYNGEAL_CARCINOMA_WITH_LMP1_UP	NA	147	127	NA	-0.113852	-2.2263	0	0.0114824	0.77		0.200674	4.29796	0	0	0
IVANOVA_HEMATOPOIESIS_MATURE_CELL	NA	148	76	NA	-0.126566	-2.22171	0.00206186	0.0117188	0.779		0.266616	4.91054	0	0	0
KAAB_FAILED_HEART_ATRIUM_DN	NA	149	86	NA	-0.171988	-2.21747	0	0.0120458	0.797		0.363968	4.83935	0	0	0
JIANG_HYPOXIA_NORMAL	NA	150	74	NA	-0.141089	-2.21646	0.00202429	0.0120798	0.801		0.315732	4.93583	0	0	0
KYNG_DNA_DAMAGE_DN	NA	151	152	NA	-0.158168	-2.2068	0	0.0126845	0.821		0.268622	3.98428	0	0	0
WANG_CISPLATIN_RESPONSE_AND_XPC_DN	NA	152	242	NA	-0.139793	-2.1977	0	0.0132113	0.837		0.198995	3.22651	0	0	0
ROSS_AML_OF_FAB_M7_TYPE	NA	153	249	NA	-0.243885	-2.18289	0.00210526	0.0146129	0.861		0.329142	3.17933	0	0	0
RHEIN_ALL_GLUCOCORTICOID_THERAPY_DN	NA	155	23	NA	-0.106246	-2.1798	0.0019685	0.0147841	0.863		0.301315	6.51894	0	0	0
YANG_BREAST_CANCER_ESR1_BULK_UP	NA	156	419	NA	-0.405407	-2.17863	0.0039604	0.014807	0.867		0.33414	1.92075	0.00201207	0.0149868	1
TARTE_PLASMA_CELL_VS_B_LYMPHOCYTE_UP	NA	154	236	NA	-0.22361	-2.1784	0.0019305	0.0147363	0.867		0.328414	3.24023	0	0	0
TURASHVILI_BREAST_LOBULAR_CARCINOMA_VS_DUCTAL_NORMAL_UP	NA	157	471	NA	-0.244288	-2.1765	0	0.0148515	0.872		0.17802	1.63987	0.0425101	0.0537943	1
OUELLET_OVARIAN_CANCER_INVASIVE_VS_LMP_UP	NA	158	136	NA	-0.187582	-2.17223	0.00203666	0.0151711	0.874		0.356859	4.14909	0	0	0
YAMAZAKI_TCEB3_TARGETS_UP	NA	162	235	NA	-0.152052	-2.16866	0	0.0154378	0.881		0.222557	3.24119	0	0	0
ZHAN_LATE_DIFFERENTIATION_GENES_UP	NA	159	352	NA	-0.331918	-2.16836	0	0.0153723	0.883		0.359984	2.41816	0	0.000805162	0.329
LE_NEURONAL_DIFFERENTIATION_UP	NA	160	405	NA	-0.440218	-2.16751	0	0.0153913	0.884		0.400064	2.01543	0.0020202	0.00922097	0.999
MAHAJAN_RESPONSE_TO_IL1A_DN	NA	161	257	NA	-0.23236	-2.16569	0.00194175	0.0154006	0.886		0.333439	3.12725	0	0	0
LIU_PROSTATE_CANCER_DN	NA	163	285	NA	-0.0966745	-2.1626	0.00200803	0.0156462	0.891		0.115964	2.85676	0	5.1902e-05	0.018
WANG_CLIM2_TARGETS_DN	NA	164	113	NA	-0.157698	-2.16003	0	0.0158612	0.897		0.309373	4.52889	0	0	0
OUELLET_CULTURED_OVARIAN_CANCER_INVASIVE_VS_LMP_UP	NA	165	239	NA	-0.240087	-2.15285	0.00625	0.0163461	0.903		0.339845	3.23354	0	0	0
CHESLER_BRAIN_HIGHEST_EXPRESSION	NA	166	207	NA	-0.296164	-2.15201	0.00215054	0.0163739	0.904		0.463384	3.41168	0	0	0
JIANG_AGING_HYPOTHALAMUS_UP	NA	168	200	NA	-0.302302	-2.1402	0	0.0175446	0.914		0.473323	3.46763	0	0	0
HERNANDEZ_ABERRANT_MITOSIS_BY_DOCETACEL_2NM_UP	NA	167	375	NA	-0.238466	-2.1398	0.00410678	0.0175049	0.914		0.231292	2.2751	0	0.00211743	0.682
LEIN_LOCALIZED_TO_PROXIMAL_DENDRITES	NA	169	199	NA	-0.311621	-2.13823	0	0.0176369	0.918		0.485858	3.4693	0	0	0
ZHAN_V1_LATE_DIFFERENTIATION_GENES_UP	NA	172	449	NA	-0.357121	-2.13566	0	0.0177997	0.918		0.280533	1.7354	0.0215686	0.0358714	1
UEDA_CENTRAL_CLOCK	NA	171	263	NA	-0.205937	-2.13492	0.00641026	0.0177849	0.918		0.288155	3.07132	0	0	0
BLUM_RESPONSE_TO_SALIRASIB_UP	NA	170	52	NA	-0.130121	-2.13465	0.00625	0.017699	0.918		0.309419	5.42284	0	0	0
YANAGIHARA_ESX1_TARGETS	NA	173	349	NA	-0.352833	-2.13273	0.00194932	0.01782	0.92		0.390767	2.42963	0.00416667	0.000747927	0.306
WANG_ESOPHAGUS_CANCER_VS_NORMAL_DN	NA	174	250	NA	-0.198771	-2.12894	0.00200803	0.0181422	0.926		0.278621	3.17723	0	0	0
ALONSO_METASTASIS_EMT_UP	NA	176	330	NA	-0.340885	-2.12589	0.00385356	0.018444	0.93		0.385666	2.60205	0	0.000225896	0.093
TURASHVILI_BREAST_DUCTAL_CARCINOMA_VS_LOBULAR_NORMAL_DN	NA	175	517	NA	-0.290577	-2.12562	0	0.0183881	0.931		0.13904	1.23453	0.198807	0.242629	1
LIN_NPAS4_TARGETS_UP	NA	177	94	NA	-0.148568	-2.12283	0	0.0186366	0.937		0.335651	4.75486	0	0	0
KARLSSON_TGFB1_TARGETS_UP	NA	178	70	NA	-0.170212	-2.11897	0	0.0189642	0.939		0.393266	4.98549	0	0	0
IGARASHI_ATF4_TARGETS_DN	NA	179	316	NA	-0.21013	-2.11487	0	0.0194086	0.943		0.245288	2.71389	0	9.65284e-05	0.038
KONDO_EZH2_TARGETS	NA	180	362	NA	-0.141887	-2.10562	0.00205761	0.0204053	0.948		0.140817	2.34859	0	0.00135102	0.5
LEE_AGING_NEOCORTEX_UP	NA	181	147	NA	-0.22608	-2.10425	0.0040404	0.0204655	0.949		0.414964	4.04487	0	0	0
HOLLMANN_APOPTOSIS_VIA_CD40_DN	NA	184	144	NA	-0.12971	-2.09522	0.00195312	0.0214555	0.964		0.231753	4.06142	0	0	0
LI_AMPLIFIED_IN_LUNG_CANCER	NA	183	182	NA	-0.155588	-2.09479	0.00548446	0.021393	0.964		0.236842	3.61838	0	0	0
LEIN_PONS_MARKERS	NA	182	230	NA	-0.206917	-2.09413	0.00202429	0.0213679	0.965		0.295783	3.28341	0	0	0
WESTON_VEGFA_TARGETS	NA	185	435	NA	-0.207251	-2.08973	0.00596422	0.0217608	0.97		0.158094	1.84138	0.0146751	0.0219152	1
RODWELL_AGING_KIDNEY_NO_BLOOD_UP	NA	186	382	NA	-0.138538	-2.08363	0.002	0.0224241	0.974		0.137714	2.20951	0.00204918	0.00317011	0.837
RAMALHO_STEMNESS_UP	NA	187	33	NA	-0.136077	-2.07824	0.00806452	0.023099	0.975		0.399721	6.14458	0	0	0
ONDER_CDH1_SIGNALING_VIA_CTNNB1	NA	188	498	NA	-0.207937	-2.07528	0.00628931	0.0233641	0.976		0.13422	1.42073	0.100616	0.127345	1
BYSTRYKH_HEMATOPOIESIS_STEM_CELL_QTL_CIS	NA	191	141	NA	-0.169427	-2.06945	0.0020284	0.0241539	0.979		0.326684	4.09982	0	0	0
FRASOR_RESPONSE_TO_ESTRADIOL_DN	NA	190	414	NA	-0.228076	-2.06901	0	0.0240992	0.979		0.196896	1.93864	0.0120482	0.0136352	1
CHAUHAN_RESPONSE_TO_METHOXYESTRADIOL_DN	NA	192	189	NA	-0.184696	-2.06684	0.00205761	0.0241603	0.98		0.318678	3.5537	0	0	0
CHARAFE_BREAST_CANCER_LUMINAL_VS_MESENCHYMAL_DN	NA	189	35	NA	-0.0893117	-2.06631	0.0040568	0.0240952	0.98		0.254791	6.01224	0	0	0
KENNY_CTNNB1_TARGETS_DN	NA	193	367	NA	-0.278323	-2.06514	0.00186916	0.024185	0.98		0.276525	2.33504	0	0.0014627	0.537
SASSON_RESPONSE_TO_FORSKOLIN_UP	NA	194	282	NA	-0.202995	-2.06395	0.0041841	0.0242056	0.981		0.268256	2.89171	0	2.67642e-05	0.009
CHICAS_RB1_TARGETS_CONFLUENT	NA	195	184	NA	-0.0847188	-2.05543	0.00769231	0.0254034	0.984		0.138425	3.59028	0	0	0
WANG_TARGETS_OF_MLL_CBP_FUSION_DN	NA	196	238	NA	-0.274314	-2.05359	0.00584795	0.0256006	0.987		0.440945	3.23759	0	0	0
JOHNSTONE_PARVB_TARGETS_2_DN	NA	197	46	NA	-0.100669	-2.05108	0.0122951	0.0258519	0.987		0.28242	5.64597	0	0	0
BAKKER_FOXO3_TARGETS_UP	NA	199	457	NA	-0.249888	-2.04788	0.0056926	0.026168	0.99		0.204838	1.68696	0.0295276	0.0440576	1
ABBUD_LIF_SIGNALING_1_DN	NA	198	518	NA	-0.402095	-2.04779	0.00385356	0.0260569	0.99		0.209553	1.23061	0.195699	0.245717	1
JIANG_TIP30_TARGETS_UP	NA	200	376	NA	-0.271664	-2.04014	0	0.0270046	0.992		0.293638	2.24599	0	0.00256876	0.75
ASTON_MAJOR_DEPRESSIVE_DISORDER_DN	NA	202	57	NA	-0.146781	-2.03482	0.00409836	0.0277542	0.992		0.370084	5.35501	0	0	0
ELLWOOD_MYC_TARGETS_DN	NA	201	305	NA	-0.306676	-2.03455	0.00604839	0.0276874	0.992		0.380698	2.78644	0	7.23185e-05	0.027
DUTERTRE_ESTRADIOL_RESPONSE_24HR_DN	NA	203	63	NA	-0.0870598	-2.0311	0.00201613	0.0281465	0.994		0.208662	5.22007	0	0	0
CROONQUIST_STROMAL_STIMULATION_UP	NA	204	488	NA	-0.266774	-2.02954	0	0.0282782	0.994		0.17131	1.48804	0.0755467	0.0994227	1
FRIDMAN_SENESCENCE_UP	NA	205	284	NA	-0.211673	-2.02716	0.00994036	0.0285111	0.995		0.297161	2.88263	0	3.83082e-05	0.013
HOUSTIS_ROS	NA	206	475	NA	-0.318379	-2.02457	0.0104603	0.0288881	0.996		0.24191	1.60337	0.0356473	0.0628236	1
CROMER_TUMORIGENESIS_UP	NA	207	516	NA	-0.272023	-2.01977	0.0040404	0.0292989	0.996		0.149672	1.23586	0.21499	0.241809	1
TAKEDA_TARGETS_OF_NUP98_HOXA9_FUSION_8D_DN	NA	208	485	NA	-0.156578	-2.01732	0.00956023	0.0296453	0.996		0.10205	1.52496	0.0497925	0.0865446	1
IKEDA_MIR30_TARGETS_DN	NA	209	403	NA	-0.374179	-2.0152	0.004	0.0298633	0.996		0.360144	2.02039	0.00389105	0.00898894	0.998
NELSON_RESPONSE_TO_ANDROGEN_UP	NA	210	275	NA	-0.210468	-2.00373	0.00399202	0.0317231	0.996		0.283338	2.91902	0	2.72946e-05	0.009
IVANOVA_HEMATOPOIESIS_INTERMEDIATE_PROGENITOR	NA	212	110	NA	-0.15934	-2	0.00744879	0.0323456	0.996		0.360559	4.61877	0	0	0
HORIUCHI_WTAP_TARGETS_UP	NA	211	129	NA	-0.111576	-1.99967	0.00210526	0.0322891	0.996		0.233065	4.22402	0	0	0
APRELIKOVA_BRCA1_TARGETS	NA	213	279	NA	-0.296666	-1.9938	0.00192308	0.0332057	0.996		0.400542	2.89783	0	2.69547e-05	0.009
CHEBOTAEV_GR_TARGETS_DN	NA	214	464	NA	-0.177446	-1.99201	0.00617284	0.0333981	0.996		0.133438	1.65077	0.032	0.0515688	1
VANTVEER_BREAST_CANCER_BRCA1_DN	NA	215	472	NA	-0.288237	-1.99015	0.00806452	0.0336502	0.996		0.211513	1.62943	0.0332681	0.056312	1
MCBRYAN_PUBERTAL_TGFB1_TARGETS_UP	NA	216	143	NA	-0.140257	-1.98304	0.00189394	0.0350977	0.998		0.275747	4.07039	0	0	0
LIANG_HEMATOPOIESIS_STEM_CELL_NUMBER_LARGE_VS_TINY_UP	NA	217	441	NA	-0.280626	-1.98252	0.0019802	0.0351786	0.998		0.246329	1.80994	0.0103093	0.0254246	1
BACOLOD_RESISTANCE_TO_ALKYLATING_AGENTS_UP	NA	219	427	NA	-0.421352	-1.97966	0.0040404	0.0356499	0.998		0.397183	1.88932	0.01566	0.0173046	1
SESTO_RESPONSE_TO_UV_C1	NA	218	286	NA	-0.228102	-1.97775	0.00385356	0.0355918	0.998		0.304407	2.85603	0	5.1813e-05	0.018
GINESTIER_BREAST_CANCER_20Q13_AMPLIFICATION_UP	NA	220	135	NA	-0.175463	-1.97521	0.00996016	0.0359059	0.998		0.376016	4.15968	0	0	0
HAN_SATB1_TARGETS_DN	NA	221	165	NA	-0.1017	-1.97363	0.0105932	0.0361493	0.998		0.181302	3.85218	0	0	0
MARCHINI_TRABECTEDIN_RESISTANCE_DN	NA	222	408	NA	-0.262044	-1.96823	0.00631579	0.0371649	1		0.259446	1.99244	0.00744879	0.010408	1
FAELT_B_CLL_WITH_VH_REARRANGEMENTS_DN	NA	223	296	NA	-0.256361	-1.96702	0.00798403	0.0373126	1		0.351669	2.8189	0	5.82547e-05	0.021
JI_RESPONSE_TO_FSH_DN	NA	224	219	NA	-0.238367	-1.96125	0.00567108	0.0384859	1		0.388825	3.32101	0	0	0
STONER_ESOPHAGEAL_CARCINOGENESIS_UP	NA	225	415	NA	-0.292521	-1.95961	0.00828157	0.038695	1		0.27648	1.9365	0	0.0137976	1
BROWNE_HCMV_INFECTION_16HR_UP	NA	226	97	NA	-0.121446	-1.95783	0.00595238	0.038923	1		0.286348	4.74095	0	0	0
TERAO_AOX4_TARGETS_HG_UP	NA	227	243	NA	-0.339718	-1.95403	0.00580271	0.0396839	1		0.564975	3.20049	0	0	0
ZHOU_TNF_SIGNALING_30MIN	NA	228	201	NA	-0.245622	-1.95211	0.00796813	0.0400314	1		0.409209	3.46245	0	0	0
CAIRO_HEPATOBLASTOMA_CLASSES_DN	NA	232	406	NA	-0.136412	-1.93641	0.0039604	0.0432581	1		0.124731	2.01328	0.00205761	0.00931879	0.999
JOSEPH_RESPONSE_TO_SODIUM_BUTYRATE_UP	NA	235	345	NA	-0.331737	-1.93484	0.00395257	0.0433982	1		0.38888	2.46529	0	0.000550495	0.229
ONDER_CDH1_TARGETS_3_UP	NA	233	494	NA	-0.399925	-1.93444	0.00394477	0.0433198	1		0.294972	1.45597	0.0861723	0.111879	1
KOBAYASHI_EGFR_SIGNALING_24HR_UP	NA	234	377	NA	-0.197927	-1.93353	0.00813008	0.0433264	1		0.211165	2.24317	0	0.00260482	0.758
SHETH_LIVER_CANCER_VS_TXNIP_LOSS_PAM4	NA	231	474	NA	-0.122351	-1.93342	0.00788955	0.0432107	1		0.089058	1.60951	0.0477137	0.0613095	1
AKL_HTLV1_INFECTION_DN	NA	230	399	NA	-0.222669	-1.93303	0.00580271	0.0431329	1		0.220446	2.05824	0.00423729	0.0073712	0.993
DEMAGALHAES_AGING_UP	NA	229	319	NA	-0.252072	-1.93246	0.00619835	0.0431117	1		0.330584	2.69434	0.002	0.000110284	0.043
TIEN_INTESTINE_PROBIOTICS_6HR_DN	NA	236	71	NA	-0.136465	-1.92931	0.00792079	0.0437349	1		0.33431	4.96384	0	0	0
SHAFFER_IRF4_TARGETS_IN_MYELOMA_VS_MATURE_B_LYMPHOCYTE	NA	237	216	NA	-0.176461	-1.92467	0.0158103	0.0447947	1		0.297709	3.35314	0	0	0
SCHAEFFER_PROSTATE_DEVELOPMENT_12HR_DN	NA	238	300	NA	-0.244378	-1.9177	0.010395	0.0462736	1		0.324685	2.80341	0	6.26343e-05	0.023
SENESE_HDAC1_TARGETS_UP	NA	239	44	NA	-0.0885386	-1.91526	0.00612245	0.0466699	1		0.250063	5.77047	0	0	0
BASAKI_YBX1_TARGETS_DN	NA	240	131	NA	-0.0970352	-1.91365	0.00201613	0.0469421	1		0.193659	4.17449	0	0	0
PASQUALUCCI_LYMPHOMA_BY_GC_STAGE_UP	NA	242	204	NA	-0.107737	-1.91217	0.00967118	0.0471307	1		0.183148	3.43779	0	0	0
SESTO_RESPONSE_TO_UV_C2	NA	241	202	NA	-0.224747	-1.91199	0.00422833	0.0470063	1		0.418152	3.44625	0	0	0
KRIEG_KDM3A_TARGETS_NOT_HYPOXIA	NA	243	145	NA	-0.129534	-1.90974	0.0100402	0.0474385	1		0.259994	4.05815	0	0	0
LENAOUR_DENDRITIC_CELL_MATURATION_DN	NA	246	497	NA	-0.164086	-1.90582	0.00630252	0.0481177	1		0.11399	1.43622	0.0711462	0.120234	1
BROWN_MYELOID_CELL_DEVELOPMENT_UP	NA	244	391	NA	-0.156332	-1.90569	0.0116505	0.0479911	1		0.155418	2.16851	0.00210526	0.00395318	0.903
DEURIG_T_CELL_PROLYMPHOCYTIC_LEUKEMIA_DN	NA	247	128	NA	-0.105082	-1.90408	0.00610998	0.0481809	1		0.223706	4.28979	0	0	0
TONKS_TARGETS_OF_RUNX1_RUNX1T1_FUSION_HSC_UP	NA	245	232	NA	-0.134609	-1.90383	0.00984252	0.0480727	1		0.220944	3.26886	0	0	0
WESTON_VEGFA_TARGETS_3HR	NA	248	395	NA	-0.223895	-1.90124	0.0118812	0.048358	1		0.210583	2.07745	0.00389864	0.00664636	0.987
LANDIS_ERBB2_BREAST_PRENEOPLASTIC_DN	NA	249	353	NA	-0.230882	-1.89841	0.010395	0.0487353	1		0.28448	2.40792	0	0.00086771	0.355
MELLMAN_TUT1_TARGETS_UP	NA	251	380	NA	-0.368308	-1.89719	0.0100402	0.0488841	1		0.430035	2.22996	0	0.00281185	0.791
GRYDER_PAX3FOXO1_ENHANCERS_KO_DOWN	NA	250	15	NA	-0.0847034	-1.89678	0.0101215	0.0487973	1		0.309172	7.22492	0	0	0
MIYAGAWA_TARGETS_OF_EWSR1_ETS_FUSIONS_DN	NA	253	338	NA	-0.122324	-1.88814	0.00817996	0.0505981	1		0.15434	2.53666	0	0.000354195	0.144
WAMUNYOKOLI_OVARIAN_CANCER_GRADES_1_2_UP	NA	252	313	NA	-0.1596	-1.88751	0.00976562	0.050587	1		0.207451	2.72829	0	9.46173e-05	0.037
JIANG_VHL_TARGETS	NA	254	241	NA	-0.193431	-1.88664	0.0202429	0.050627	1		0.32139	3.23064	0	0	0
JOHNSTONE_PARVB_TARGETS_1_DN	NA	259	394	NA	-0.223315	-1.88121	0.0136187	0.0520825	1		0.250823	2.107	0.008	0.00563854	0.968
ZAMORA_NOS2_TARGETS_DN	NA	257	361	NA	-0.204511	-1.88086	0.00628931	0.0520379	1		0.232728	2.35251	0.00579151	0.00131105	0.49
BASSO_B_LYMPHOCYTE_NETWORK	NA	261	96	NA	-0.143017	-1.87916	0.0135659	0.0521626	1		0.350921	4.74945	0	0	0
IIZUKA_LIVER_CANCER_PROGRESSION_L1_G1_UP	NA	260	396	NA	-0.389205	-1.87856	0.00592885	0.0521554	1		0.432231	2.076	0.00200803	0.00670583	0.987
LI_DCP2_BOUND_MRNA	NA	258	181	NA	-0.183371	-1.87833	0.0125	0.052048	1		0.357183	3.64753	0	0	0
QI_HYPOXIA	NA	255	298	NA	-0.147014	-1.87822	0.0115385	0.0518955	1		0.222732	2.81356	0	6.32494e-05	0.023
IVANOVA_HEMATOPOIESIS_LATE_PROGENITOR	NA	262	36	NA	-0.0823045	-1.87674	0.0039604	0.0521761	1		0.244321	6.00259	0	0	0
BARIS_THYROID_CANCER_UP	NA	256	387	NA	-0.343306	-1.87669	0.0137795	0.0520204	1		0.378765	2.18279	0.00376648	0.00367134	0.882
RAHMAN_TP53_TARGETS_PHOSPHORYLATED	NA	263	272	NA	-0.354283	-1.87516	0.0127119	0.0523842	1		0.583371	2.92774	0	2.14805e-05	0.007
HARRIS_HYPOXIA	NA	265	386	NA	-0.198016	-1.87387	0.013834	0.0526253	1		0.214972	2.18353	0	0.00364244	0.881
VERNELL_RETINOBLASTOMA_PATHWAY_DN	NA	264	424	NA	-0.40313	-1.87343	0.00576923	0.0525838	1		0.390262	1.9054	0.00996016	0.0161382	1
SANA_TNF_SIGNALING_DN	NA	266	366	NA	-0.187315	-1.87045	0.012024	0.0530984	1		0.235339	2.33508	0	0.00146436	0.537
RICKMAN_METASTASIS_UP	NA	268	30	NA	-0.0974454	-1.86905	0.0102881	0.0533282	1		0.316864	6.2343	0	0	0
PACHER_TARGETS_OF_IGF1_AND_IGF2_UP	NA	267	354	NA	-0.288886	-1.86867	0.0191083	0.0532776	1		0.329245	2.40294	0	0.000932228	0.381
GOTTWEIN_TARGETS_OF_KSHV_MIR_K12_11	NA	269	231	NA	-0.217761	-1.86136	0.0203666	0.0549394	1		0.369778	3.28219	0	0	0
NUTT_GBM_VS_AO_GLIOMA_UP	NA	270	335	NA	-0.243426	-1.86072	0.01	0.0549912	1		0.337445	2.5596	0.00204918	0.00031817	0.132
MCBRYAN_PUBERTAL_BREAST_3_4WK_DN	NA	271	484	NA	-0.294864	-1.85883	0.00196464	0.0553651	1		0.221643	1.53729	0.0605428	0.08231	1
GABRIELY_MIR21_TARGETS	NA	273	40	NA	-0.100818	-1.85766	0.0063425	0.0555227	1		0.308311	5.85896	0	0	0
JIANG_HYPOXIA_VIA_VHL	NA	272	431	NA	-0.374374	-1.85751	0.00829876	0.0553786	1		0.384421	1.86921	0.00998004	0.0191863	1
DAVICIONI_MOLECULAR_ARMS_VS_ERMS_UP	NA	274	64	NA	-0.0962135	-1.85527	0.0182186	0.0559153	1		0.253096	5.15348	0	0	0
SMITH_TERT_TARGETS_DN	NA	276	315	NA	-0.183608	-1.85388	0.00996016	0.0561642	1		0.250653	2.71694	0	9.68222e-05	0.038
ZHENG_FOXP3_TARGETS_IN_THYMUS_UP	NA	277	118	NA	-0.123302	-1.85323	0.00948767	0.0561953	1		0.277697	4.41691	0	0	0
HELLEBREKERS_SILENCED_DURING_TUMOR_ANGIOGENESIS	NA	275	374	NA	-0.203256	-1.85296	0.0149893	0.0560819	1		0.235916	2.30364	0.00205339	0.00178156	0.612
CAIRO_LIVER_DEVELOPMENT_UP	NA	278	72	NA	-0.125641	-1.85076	0.0103734	0.0566371	1		0.33819	4.96195	0	0	0
AMIT_EGF_RESPONSE_240_MCF10A	NA	279	385	NA	-0.350615	-1.8501	0.012	0.0567018	1		0.410886	2.18693	0.00201207	0.00358945	0.874
BOCHKIS_FOXA2_TARGETS	NA	280	262	NA	-0.0936334	-1.84403	0.0104603	0.0585342	1		0.138197	3.10492	0	0	0
HOFMANN_MYELODYSPLASTIC_SYNDROM_LOW_RISK_DN	NA	281	446	NA	-0.35919	-1.84288	0.0116732	0.0586886	1		0.284922	1.78691	0.0114504	0.0282732	1
MILI_PSEUDOPODIA	NA	282	331	NA	-0.234703	-1.84046	0.0159681	0.0592038	1		0.330261	2.5973	0	0.000234673	0.097
BERTUCCI_MEDULLARY_VS_DUCTAL_BREAST_CANCER_DN	NA	283	233	NA	-0.128034	-1.8369	0.00785855	0.0599814	1		0.222155	3.26749	0	0	0
FAELT_B_CLL_WITH_VH3_21_DN	NA	284	265	NA	-0.241154	-1.83579	0.0198413	0.0601222	1		0.383238	3.03704	0	0	0
GINESTIER_BREAST_CANCER_ZNF217_AMPLIFIED_UP	NA	285	267	NA	-0.203208	-1.83269	0.00582524	0.0607355	1		0.323898	3.01564	0	3.17256e-06	0.001
NAKAMURA_TUMOR_ZONE_PERIPHERAL_VS_CENTRAL_UP	NA	288	102	NA	-0.103084	-1.83081	0.0114943	0.0612243	1		0.25206	4.69497	0	0	0
BONOME_OVARIAN_CANCER_SURVIVAL_SUBOPTIMAL_DEBULKING	NA	287	89	NA	-0.079578	-1.83067	0.0136187	0.0610625	1		0.192328	4.79863	0	0	0
MARKEY_RB1_CHRONIC_LOF_DN	NA	286	355	NA	-0.161406	-1.83041	0.0102669	0.060909	1		0.197493	2.39785	0	0.000978035	0.39
VANHARANTA_UTERINE_FIBROID_WITH_7Q_DELETION_DN	NA	289	244	NA	-0.267106	-1.82812	0.014	0.0615406	1		0.446561	3.19664	0	0	0
BERENJENO_TRANSFORMED_BY_RHOA_FOREVER_UP	NA	291	466	NA	-0.376607	-1.8246	0.00961539	0.0624237	1		0.313081	1.64977	0.0419048	0.0517504	1
NADLER_OBESITY_DN	NA	290	467	NA	-0.263103	-1.82418	0.0173745	0.0623761	1		0.205388	1.64416	0.0487288	0.0529296	1
CHUNG_BLISTER_CYTOTOXICITY_UP	NA	292	203	NA	-0.147868	-1.82209	0.00635593	0.0628535	1		0.270309	3.43996	0	0	0
ZHAN_MULTIPLE_MYELOMA_CD1_AND_CD2_DN	NA	294	278	NA	-0.226062	-1.8209	0.0120724	0.0630518	1		0.345842	2.90112	0	2.70027e-05	0.009
INGRAM_SHH_TARGETS_UP	NA	293	513	NA	-0.158065	-1.82085	0.00407332	0.0628771	1		0.0972861	1.25989	0.168033	0.223853	1
KAAB_FAILED_HEART_VENTRICLE_DN	NA	296	322	NA	-0.266657	-1.81704	0.0114723	0.0641404	1		0.367428	2.68131	0	0.000121183	0.048
GAUSSMANN_MLL_AF4_FUSION_TARGETS_A_UP	NA	295	105	NA	-0.12265	-1.81648	0.00773694	0.0641344	1		0.294076	4.65656	0	0	0
DORSAM_HOXA9_TARGETS_UP	NA	297	356	NA	-0.272498	-1.81465	0.0160321	0.0645703	1		0.337221	2.39601	0	0.000986987	0.394
LINDGREN_BLADDER_CANCER_CLUSTER_1_UP	NA	298	261	NA	-0.152818	-1.80862	0.0168067	0.0663656	1		0.257603	3.11121	0	0	0
POMEROY_MEDULLOBLASTOMA_DESMOPLASIC_VS_CLASSIC_DN	NA	299	400	NA	-0.21461	-1.80801	0.0175097	0.0664197	1		0.225105	2.03302	0.00196078	0.00842588	0.996
LIU_SOX4_TARGETS_UP	NA	300	137	NA	-0.146954	-1.80572	0.0142857	0.0669823	1		0.319708	4.14797	0	0	0
TONKS_TARGETS_OF_RUNX1_RUNX1T1_FUSION_MONOCYTE_UP	NA	301	85	NA	-0.120696	-1.80455	0.0182186	0.0672461	1		0.300098	4.84144	0	0	0
GAZDA_DIAMOND_BLACKFAN_ANEMIA_ERYTHROID_UP	NA	302	455	NA	-0.323286	-1.80294	0.0101833	0.0676065	1		0.283737	1.70444	0.0305677	0.0410277	1
MOLENAAR_TARGETS_OF_CCND1_AND_CDK4_UP	NA	303	334	NA	-0.225627	-1.79885	0.00594059	0.0688838	1		0.304693	2.56436	0	0.000304345	0.125
SHAFFER_IRF4_TARGETS_IN_ACTIVATED_B_LYMPHOCYTE	NA	304	209	NA	-0.189049	-1.7976	0.0171756	0.0691952	1		0.337511	3.39077	0	0	0
GARY_CD5_TARGETS_DN	NA	305	6	NA	-0.0798882	-1.79702	0.0137255	0.0692158	1		0.351436	8.14798	0	0	0
NIKOLSKY_BREAST_CANCER_8Q12_Q22_AMPLICON	NA	306	420	NA	-0.159011	-1.79631	0.0168067	0.0692828	1		0.148317	1.91992	0.00383877	0.0150361	1
LINDGREN_BLADDER_CANCER_CLUSTER_2A_DN	NA	307	115	NA	-0.13911	-1.79477	0.0195228	0.0696874	1		0.343108	4.49695	0	0	0
BURTON_ADIPOGENESIS_PEAK_AT_0HR	NA	308	378	NA	-0.207469	-1.79282	0.0152672	0.0701399	1		0.248126	2.24043	0	0.00263214	0.766
LIANG_HEMATOPOIESIS_STEM_CELL_NUMBER_SMALL_VS_HUGE_UP	NA	309	430	NA	-0.29095	-1.79226	0.0122449	0.0701743	1		0.268076	1.87409	0.015873	0.0187418	1
KINSEY_TARGETS_OF_EWSR1_FLII_FUSION_DN	NA	310	125	NA	-0.0936517	-1.7894	0.0103734	0.0708603	1		0.217064	4.3008	0	0	0
KYNG_WERNER_SYNDROM_AND_NORMAL_AGING_DN	NA	311	92	NA	-0.122279	-1.78841	0.0176125	0.0710857	1		0.317633	4.77211	0	0	0
CLASPER_LYMPHATIC_VESSELS_DURING_METASTASIS_UP	NA	312	503	NA	-0.340299	-1.78604	0.0139165	0.0717532	1		0.26349	1.39457	0.10883	0.140464	1
KIM_HYPOXIA	NA	313	340	NA	-0.339263	-1.78437	0.0280899	0.0721504	1		0.479236	2.50612	0	0.00043164	0.174
MCBRYAN_PUBERTAL_BREAST_6_7WK_DN	NA	314	493	NA	-0.1915	-1.77804	0.0239044	0.0742501	1		0.146422	1.45609	0.0983936	0.111893	1
VANOEVELEN_MYOGENESIS_SIN3A_TARGETS	NA	317	59	NA	-0.108272	-1.77139	0.013834	0.0765542	1		0.31537	5.24954	0	0	0
BRACHAT_RESPONSE_TO_CAMPTOTHECIN_DN	NA	319	297	NA	-0.246985	-1.76959	0.0220441	0.0768091	1		0.384956	2.81366	0	6.33531e-05	0.023
GAJATE_RESPONSE_TO_TRABECTEDIN_UP	NA	318	510	NA	-0.210827	-1.76927	0.0158416	0.076739	1		0.14955	1.32231	0.127016	0.18087	1
DITTMER_PTHLH_TARGETS_UP	NA	316	174	NA	-0.154134	-1.76922	0.0175781	0.0765401	1		0.312439	3.74649	0	0	0
COWLING_MYCN_TARGETS	NA	315	491	NA	-0.269782	-1.76912	0.0209205	0.0763627	1		0.194526	1.47033	0.0889371	0.106242	1
ABE_INNER_EAR	NA	321	509	NA	-0.261179	-1.76643	0.0153257	0.0772376	1		0.18128	1.3335	0.140562	0.17418	1
MOHANKUMAR_HOXA1_TARGETS_UP	NA	320	62	NA	-0.0815124	-1.76636	0.0245902	0.0770692	1		0.240309	5.22051	0	0	0
SILIGAN_TARGETS_OF_EWS_FLI1_FUSION_DN	NA	322	402	NA	-0.374855	-1.76537	0.0193798	0.0773064	1		0.403733	2.02834	0.00199203	0.00862287	0.998
GUO_HEX_TARGETS_DN	NA	326	324	NA	-0.212637	-1.75843	0.0138067	0.0798162	1		0.287603	2.62477	0	0.000193176	0.078
MUNSHI_MULTIPLE_MYELOMA_UP	NA	325	226	NA	-0.181571	-1.758	0.0241935	0.0797967	1		0.331004	3.29989	0	0	0
TOMLINS_PROSTATE_CANCER_UP	NA	324	160	NA	-0.250973	-1.75768	0.0196078	0.0797304	1		0.562237	3.90183	0	0	0
DOUGLAS_BMI1_TARGETS_DN	NA	323	55	NA	-0.090522	-1.75753	0.0210084	0.0795686	1		0.281107	5.40332	0	0	0
HELLER_HDAC_TARGETS_SILENCED_BY_METHYLATION_UP	NA	327	80	NA	-0.0839216	-1.74687	0.0227743	0.0834075	1		0.217732	4.88085	0	0	0
VALK_AML_CLUSTER_8	NA	328	511	NA	-0.31997	-1.74534	0.0219124	0.0838118	1		0.23955	1.32172	0.178082	0.180973	1
LEE_NEURAL_CREST_STEM_CELL_UP	NA	331	447	NA	-0.137076	-1.74327	0.0184805	0.0844951	1		0.125975	1.76329	0.0177515	0.0318113	1
MISSIAGLIA_REGULATED_BY_METHYLATION_UP	NA	330	347	NA	-0.151939	-1.74285	0.0217822	0.0844186	1		0.199442	2.45558	0	0.000609404	0.248
ROSS_LEUKEMIA_WITH_MLL_FUSIONS	NA	329	344	NA	-0.193229	-1.74252	0.0179641	0.084322	1		0.251442	2.47196	0	0.000537691	0.222
WALLACE_PROSTATE_CANCER_RACE_DN	NA	333	294	NA	-0.188847	-1.74035	0.0151515	0.0850838	1		0.297002	2.82504	0.00190476	5.58587e-05	0.02
LIN_MELANOMA_COPY_NUMBER_DN	NA	332	292	NA	-0.247601	-1.74023	0.0137795	0.0849179	1		0.391272	2.82683	0	5.61385e-05	0.02
SASSON_RESPONSE_TO_FORSKOLIN_DN	NA	335	176	NA	-0.167682	-1.73474	0.0192308	0.0868986	1		0.366636	3.72717	0	0	0
HIRSCH_CELLULAR_TRANSFORMATION_SIGNATURE_DN	NA	334	208	NA	-0.160025	-1.73441	0.0235294	0.0868295	1		0.299768	3.39284	0	0	0
DELPUECH_FOXO3_TARGETS_UP	NA	336	404	NA	-0.206463	-1.73039	0.0224949	0.0885188	1		0.22439	2.01958	0	0.00901298	0.999
BOQUEST_STEM_CELL_CULTURED_VS_FRESH_UP	NA	337	222	NA	-0.0840978	-1.72925	0.0454545	0.088808	1		0.147028	3.31431	0	0	0
WENDT_COHESIN_TARGETS_UP	NA	338	433	NA	-0.269411	-1.72864	0.0183673	0.0888173	1		0.284031	1.85538	0.0142857	0.0204092	1
ALONSO_METASTASIS_NEURAL_UP	NA	339	458	NA	-0.360991	-1.72781	0.0376984	0.0889731	1		0.34097	1.68452	0.0253411	0.0445234	1
TAVOR_CEBPA_TARGETS_UP	NA	340	452	NA	-0.238829	-1.72285	0.0144033	0.0906712	1		0.219136	1.71239	0.0157791	0.039584	1
FOURNIER_ACINAR_DEVELOPMENT_EARLY_UP	NA	341	506	NA	-0.353154	-1.71983	0.023622	0.0918556	1		0.271233	1.35175	0.138	0.164205	1
CROMER_METASTASIS_UP	NA	345	172	NA	-0.181421	-1.71809	0.0217391	0.09222	1		0.391717	3.77953	0	0	0
KIM_WT1_TARGETS_12HR_UP	NA	342	195	NA	-0.127025	-1.71784	0.0301811	0.0920897	1		0.246196	3.49718	0	0	0
RAO_BOUND_BY_SALL4_ISOFORM_B	NA	344	130	NA	-0.0764059	-1.71691	0.0230126	0.0922135	1		0.168519	4.20256	0	0	0
UEDA_PERIFERAL_CLOCK	NA	343	290	NA	-0.130547	-1.71642	0.0253906	0.0922114	1		0.194537	2.83935	0	5.68023e-05	0.02
BOYAULT_LIVER_CANCER_SUBCLASS_G3_UP	NA	346	48	NA	-0.111647	-1.7124	0.027668	0.0937244	1		0.36156	5.54052	0	0	0
ZHAN_MULTIPLE_MYELOMA_HP_UP	NA	348	444	NA	-0.23838	-1.70695	0.021611	0.0960854	1		0.245381	1.78801	0.0207039	0.0281622	1
GAUSSMANN_MLL_AF4_FUSION_TARGETS_C_DN	NA	347	328	NA	-0.353509	-1.70673	0.0219124	0.0959594	1		0.502091	2.60268	0	0.000226862	0.093
WONG_PROTEASOME_GENE_MODULE	NA	349	132	NA	-0.217398	-1.70527	0.030888	0.0960878	1		0.525206	4.16842	0	0	0
COATES_MACROPHAGE_M1_VS_M2_UP	NA	350	227	NA	-0.171703	-1.70097	0.0192719	0.0981508	1		0.315873	3.29107	0	0	0
ACEVEDO_NORMAL_TISSUE_ADJACENT_TO_LIVER_TUMOR_UP	NA	351	168	NA	-0.129719	-1.69693	0.0318471	0.0999355	1		0.268048	3.79704	0	0	0
RUTELLA_RESPONSE_TO_CSF2RB_AND_IL4_DN	NA	352	180	NA	-0.0920954	-1.69121	0.0203666	0.102466	1		0.191388	3.66675	0	0	0
ZHANG_TARGETS_OF_EWSR1_FLI1_FUSION	NA	353	253	NA	-0.168985	-1.6883	0.0427184	0.103629	1		0.304593	3.13804	0	0	0
WANG_TUMOR_INVASIVENESS_DN	NA	354	43	NA	-0.104125	-1.6871	0.0283401	0.10395	1		0.350917	5.80194	0	0	0
KYNG_ENVIRONMENTAL_STRESS_RESPONSE_NOT_BY_UV_IN_OLD	NA	355	409	NA	-0.330255	-1.6838	0.023301	0.105375	1		0.372006	1.98703	0.0060241	0.0106608	1
PICCALUGA_ANGIOIMMUNOBLASTIC_LYMPHOMA_DN	NA	356	205	NA	-0.130243	-1.6815	0.0234375	0.106277	1		0.262097	3.4233	0	0	0
FARMER_BREAST_CANCER_APOCRINE_VS_BASAL	NA	357	191	NA	-0.0900814	-1.67811	0.0257937	0.107945	1		0.180573	3.53861	0	0	0
AMIT_SERUM_RESPONSE_240_MCF10A	NA	359	515	NA	-0.222806	-1.67681	0.0377734	0.108368	1		0.143395	1.23771	0.174664	0.240741	1
HOELZEL_NF1_TARGETS_DN	NA	358	398	NA	-0.147166	-1.67677	0.0247423	0.108124	1		0.174861	2.06078	0.00409836	0.00727697	0.993
YAO_TEMPORAL_RESPONSE_TO_PROGESTERONE_CLUSTER_11	NA	360	79	NA	-0.157096	-1.67229	0.0210325	0.110331	1		0.433574	4.88468	0	0	0
MOREAUX_MULTIPLE_MYELOMA_BY_TACI_DN	NA	361	75	NA	-0.119335	-1.66802	0.0336134	0.112512	1		0.343892	4.9341	0	0	0
HAHTOLA_MYCOSIS_FUNGOIDES_SKIN_UP	NA	362	116	NA	-0.117042	-1.66155	0.0342052	0.115803	1		0.304503	4.44284	0	0	0
SAKAI_CHRONIC_HEPATITIS_VS_LIVER_CANCER_UP	NA	363	134	NA	-0.165035	-1.65887	0.0395257	0.117096	1		0.412113	4.16515	0	0	0
STEARMAN_TUMOR_FIELD_EFFECT_UP	NA	367	401	NA	-0.271911	-1.65705	0.0363636	0.11796	1		0.309868	2.03084	0	0.00850362	0.997
BURTON_ADIPOGENESIS_9	NA	365	186	NA	-0.16209	-1.65657	0.0294118	0.117644	1		0.355296	3.56675	0	0	0
BEGUM_TARGETS_OF_PAX3_FOXO1_FUSION_UP	NA	366	426	NA	-0.197475	-1.6561	0.029703	0.11765	1		0.210128	1.89576	0.00614754	0.0168904	1
WANG_SMARCE1_TARGETS_DN	NA	364	65	NA	-0.0824293	-1.65576	0.0457143	0.117567	1		0.246066	5.11904	0	0	0
GILDEA_METASTASIS	NA	368	500	NA	-0.321946	-1.65441	0.0430328	0.118116	1		0.2432	1.40706	0.123772	0.134066	1
GRADE_COLON_AND_RECTAL_CANCER_UP	NA	369	27	NA	-0.0885986	-1.65367	0.0374753	0.118254	1		0.327782	6.27116	0	0	0
HUANG_DASATINIB_RESISTANCE_UP	NA	371	280	NA	-0.176066	-1.65215	0.0488281	0.118813	1		0.292681	2.8963	0	2.68591e-05	0.009
SERVITJA_ISLET_HNF1A_TARGETS_UP	NA	370	258	NA	-0.124134	-1.65182	0.0417537	0.118727	1		0.213669	3.12537	0	0	0
LU_EZH2_TARGETS_DN	NA	372	54	NA	-0.0793104	-1.65103	0.0180723	0.118929	1		0.241694	5.40583	0	0	0
KUMAR_TARGETS_OF_MLL_AF9_FUSION	NA	374	350	NA	-0.0849978	-1.64784	0.0333333	0.120023	1		0.110286	2.42898	0	0.000750225	0.307
PETROVA_ENDOTHELIUM_LYMPHATIC_VS_BLOOD_DN	NA	373	358	NA	-0.122115	-1.64773	0.0231214	0.119802	1		0.168751	2.37723	0	0.00111813	0.433
ZHONG_SECRETOME_OF_LUNG_CANCER_AND_ENDOTHELIUM	NA	375	348	NA	-0.180498	-1.64619	0.029703	0.120369	1		0.263079	2.43276	0	0.000736311	0.301
SENESE_HDAC3_TARGETS_DN	NA	376	111	NA	-0.0679119	-1.64215	0.0309917	0.122416	1		0.183352	4.60177	0	0	0
HAHTOLA_MYCOSIS_FUNGOIDES_CD4_DN	NA	377	90	NA	-0.139627	-1.6402	0.0473118	0.123328	1		0.398597	4.78503	0	0	0
ZWANG_EGF_PERSISTENTLY_UP	NA	378	359	NA	-0.291244	-1.63384	0.0473251	0.12659	1		0.374114	2.36489	0	0.00120584	0.46
PUIFFE_INVASION_INHIBITED_BY_ASCITES_DN	NA	382	106	NA	-0.12528	-1.63216	0.0351967	0.127343	1		0.34952	4.65517	0	0	0
STEARMAN_LUNG_CANCER_EARLY_VS_LATE_UP	NA	381	69	NA	-0.131691	-1.63175	0.0431211	0.127298	1		0.40557	5.03775	0	0	0
BRUNO_HEMATOPOIESIS	NA	380	293	NA	-0.189039	-1.63155	0.043222	0.127079	1		0.301531	2.82569	0	5.59517e-05	0.02
IKEDA_MIR133_TARGETS_UP	NA	379	291	NA	-0.210977	-1.63133	0.0301205	0.126937	1		0.367065	2.82857	0	5.62324e-05	0.02
LEE_AGING_MUSCLE_DN	NA	383	461	NA	-0.258025	-1.62948	0.0357895	0.127781	1		0.232093	1.66833	0.0222222	0.0477688	1
ZHAN_MULTIPLE_MYELOMA_CD1_VS_CD2_DN	NA	384	318	NA	-0.220399	-1.62614	0.0458167	0.129329	1		0.345568	2.70899	0	9.84709e-05	0.038
IVANOVSKA_MIR106B_TARGETS	NA	385	187	NA	-0.159757	-1.62382	0.0376569	0.130424	1		0.339984	3.55955	0	0	0
DURCHDEWALD_SKIN_CARCINOGENESIS_DN	NA	386	120	NA	-0.0953593	-1.62076	0.0448065	0.131219	1		0.244613	4.37738	0	0	0
TURASHVILI_BREAST_DUCTAL_CARCINOMA_VS_DUCTAL_NORMAL_UP	NA	387	481	NA	-0.218857	-1.6196	0.0366089	0.131371	1		0.200786	1.55225	0.045738	0.0777744	1
PECE_MAMMARY_STEM_CELL_DN	NA	388	173	NA	-0.127881	-1.61131	0.0460405	0.136271	1		0.287076	3.75142	0	0	0
RAMALHO_STEMNESS_DN	NA	389	256	NA	-0.180756	-1.60549	0.038	0.139611	1		0.330775	3.135	0	0	0
GROSS_HYPOXIA_VIA_HIF1A_DN	NA	390	218	NA	-0.141533	-1.604	0.0264766	0.140299	1		0.287898	3.3471	0	0	0
KAN_RESPONSE_TO_ARSENIC_TRIOXIDE	NA	391	276	NA	-0.144158	-1.6009	0.0413386	0.141547	1		0.24836	2.91674	0	2.72455e-05	0.009
KYNG_RESPONSE_TO_H2O2	NA	392	314	NA	-0.177244	-1.60011	0.0474227	0.141765	1		0.281251	2.72373	0	9.69698e-05	0.038
WILSON_PROTEASES_AT_TUMOR_BONE_INTERFACE_UP	NA	394	486	NA	-0.30382	-1.59952	0.0460922	0.141802	1		0.284616	1.51826	0.0502092	0.0889989	1
MCCABE_HOXC6_TARGETS_CANCER_DN	NA	395	425	NA	-0.312288	-1.59886	0.037037	0.141993	1		0.362869	1.90275	0.00198413	0.0163758	1
LUI_THYROID_CANCER_CLUSTER_3	NA	393	303	NA	-0.270507	-1.59869	0.0625	0.141789	1		0.44926	2.79499	0	6.75124e-05	0.025
YAO_TEMPORAL_RESPONSE_TO_PROGESTERONE_CLUSTER_14	NA	396	42	NA	-0.116867	-1.59619	0.0492126	0.142787	1		0.423793	5.81412	0	0	0
WOOD_EBV_EBNA1_TARGETS_DN	NA	397	281	NA	-0.224069	-1.59544	0.0452756	0.142944	1		0.384099	2.89185	0	2.68115e-05	0.009
YAO_TEMPORAL_RESPONSE_TO_PROGESTERONE_CLUSTER_16	NA	398	453	NA	-0.176507	-1.59407	0.0458015	0.14356	1		0.170058	1.71123	0.0214425	0.0398231	1
NAKAMURA_ADIPOGENESIS_LATE_UP	NA	400	220	NA	-0.146871	-1.58937	0.0528455	0.146433	1		0.292608	3.31867	0	0	0
GERHOLD_ADIPOGENESIS_DN	NA	401	364	NA	-0.194051	-1.58876	0.045738	0.146539	1		0.277251	2.3412	0	0.00141474	0.521
FARMER_BREAST_CANCER_BASAL_VS_LULMINAL	NA	399	309	NA	-0.085566	-1.58852	0.0516129	0.146409	1		0.139112	2.77271	0	7.66038e-05	0.029
CONCANNON_APOPTOSIS_BY_EPOXOMICIN_UP	NA	402	103	NA	-0.0970784	-1.58689	0.0364372	0.146855	1		0.275614	4.67589	0	0	0
MCCLUNG_DELTA_FOSB_TARGETS_2WK	NA	404	213	NA	-0.213856	-1.58574	0.0491159	0.147275	1		0.434502	3.36363	0	0	0
PROVENZANI_METASTASIS_UP	NA	403	171	NA	-0.111697	-1.58555	0.0503018	0.147125	1		0.245825	3.78199	0	0	0
TOMIDA_METASTASIS_UP	NA	405	437	NA	-0.294372	-1.58462	0.047081	0.147413	1		0.325485	1.83219	0.0155039	0.022835	1
LIU_CMYB_TARGETS_UP	NA	406	247	NA	-0.122013	-1.58408	0.030426	0.147438	1		0.224084	3.18814	0	0	0
LIU_VMYB_TARGETS_UP	NA	407	121	NA	-0.129681	-1.57959	0.0675944	0.150269	1		0.352998	4.34926	0	0	0
MAYBURD_RESPONSE_TO_L663536_DN	NA	408	251	NA	-0.19618	-1.57891	0.0505263	0.150432	1		0.38433	3.17162	0	0	0
MORI_PRE_BI_LYMPHOCYTE_DN	NA	409	392	NA	-0.167811	-1.57787	0.0490798	0.150883	1		0.21532	2.14001	0.00390625	0.00470654	0.941
CHESLER_BRAIN_QTL_CIS	NA	414	248	NA	-0.170752	-1.57615	0.041502	0.151675	1		0.325804	3.18723	0	0	0
SAMOLS_TARGETS_OF_KHSV_MIRNAS_DN	NA	412	445	NA	-0.207374	-1.57574	0.0489362	0.151656	1		0.208198	1.78713	0.0152672	0.0282962	1
MITSIADES_RESPONSE_TO_APLIDIN_UP	NA	415	114	NA	-0.0734043	-1.57511	0.0504032	0.151815	1		0.204302	4.49962	0	0	0
OISHI_CHOLANGIOMA_STEM_CELL_LIKE_UP	NA	411	22	NA	-0.083631	-1.57499	0.039604	0.151588	1		0.334858	6.60813	0	0	0
GERY_CEBP_TARGETS	NA	413	302	NA	-0.141782	-1.5744	0.0614754	0.151662	1		0.223664	2.80169	0	6.49487e-05	0.024
ZHENG_BOUND_BY_FOXP3	NA	410	107	NA	-0.0693982	-1.57417	0.0367347	0.151526	1		0.186374	4.64968	0	0	0
PELLICCIOTTA_HDAC_IN_ANTIGEN_PRESENTATION_DN	NA	416	190	NA	-0.198197	-1.57282	0.0595745	0.152167	1		0.44424	3.55191	0	0	0
TONKS_TARGETS_OF_RUNX1_RUNX1T1_FUSION_ERYTHROCYTE_UP	NA	417	365	NA	-0.124256	-1.57078	0.0623742	0.153297	1		0.173972	2.33684	0	0.00144661	0.532
KAYO_AGING_MUSCLE_DN	NA	418	223	NA	-0.136681	-1.56841	0.0374753	0.154602	1		0.2755	3.30699	0	0	0
NIKOLSKY_BREAST_CANCER_8P12_P11_AMPLICON	NA	419	502	NA	-0.217438	-1.56597	0.0472441	0.155704	1		0.166929	1.39546	0.10917	0.140055	1
BRACHAT_RESPONSE_TO_METHOTREXATE_DN	NA	420	434	NA	-0.27533	-1.56349	0.0394191	0.157142	1		0.316465	1.84442	0.021097	0.0216293	1
TURASHVILI_BREAST_DUCTAL_CARCINOMA_VS_LOBULAR_NORMAL_UP	NA	421	501	NA	-0.165564	-1.56159	0.0528455	0.158122	1		0.143226	1.4027	0.104651	0.136174	1
ZHONG_RESPONSE_TO_AZACITIDINE_AND_TSA_UP	NA	422	161	NA	-0.116911	-1.56104	0.0526316	0.158209	1		0.272142	3.88899	0	0	0
ALCALA_APOPTOSIS	NA	424	198	NA	-0.156253	-1.55984	0.0610687	0.158784	1		0.333238	3.47733	0	0	0
DAVICIONI_PAX_FOXO1_SIGNATURE_IN_ARMS_UP	NA	423	368	NA	-0.189127	-1.55964	0.0560166	0.158603	1		0.269181	2.33463	0	0.00146487	0.538
ELVIDGE_HYPOXIA_BY_DMOG_UP	NA	425	373	NA	-0.127974	-1.55756	0.0511247	0.159794	1		0.17746	2.3038	0	0.00178165	0.612
SCHAEFFER_PROSTATE_DEVELOPMENT_48HR_DN	NA	427	139	NA	-0.0738422	-1.55647	0.0421687	0.160282	1		0.181892	4.1233	0	0	0
RODWELL_AGING_KIDNEY_DN	NA	426	255	NA	-0.12748	-1.55624	0.0488281	0.160137	1		0.235672	3.13513	0	0	0
COLIN_PILOCYTIC_ASTROCYTOMA_VS_GLIOBLASTOMA_DN	NA	428	459	NA	-0.254491	-1.55517	0.0617761	0.16055	1		0.268205	1.68448	0.0206612	0.044506	1
KYNG_ENVIRONMENTAL_STRESS_RESPONSE_NOT_BY_4NQO_IN_WS	NA	429	443	NA	-0.247194	-1.54986	0.0590631	0.163974	1		0.259438	1.79273	0.0123967	0.0275381	1
WANG_LSD1_TARGETS_DN	NA	430	480	NA	-0.233311	-1.547	0.0611814	0.165098	1		0.219429	1.55717	0.0461255	0.0761918	1
RUTELLA_RESPONSE_TO_CSF2RB_AND_IL4_UP	NA	431	98	NA	-0.080633	-1.54529	0.054326	0.165785	1		0.234191	4.71236	0	0	0
AKL_HTLV1_INFECTION_UP	NA	432	342	NA	-0.259844	-1.54364	0.057971	0.165811	1		0.430144	2.49276	0	0.00046901	0.191
PILON_KLF1_TARGETS_UP	NA	433	237	NA	-0.0690193	-1.54263	0.0546218	0.166276	1		0.132658	3.23952	0	0	0
JOHANSSON_GLIOMAGENESIS_BY_PDGFB_UP	NA	434	185	NA	-0.181977	-1.54165	0.0538462	0.166698	1		0.42846	3.58684	0	0	0
NAKAMURA_ADIPOGENESIS_LATE_DN	NA	438	477	NA	-0.235005	-1.53673	0.0600775	0.169874	1		0.230559	1.58385	0.0494071	0.0680839	1
IKEDA_MIR1_TARGETS_UP	NA	437	178	NA	-0.180187	-1.53639	0.0688976	0.169772	1		0.426569	3.69824	0	0	0
FIGUEROA_AML_METHYLATION_CLUSTER_1_UP	NA	436	343	NA	-0.140208	-1.53624	0.0590476	0.169567	1		0.207809	2.48636	0	0.000488003	0.2
ZHU_CMV_ALL_DN	NA	435	465	NA	-0.13652	-1.53591	0.0591716	0.169516	1		0.133073	1.6502	0.0419048	0.0516703	1
OUILLETTE_CLL_13Q14_DELETION_UP	NA	440	269	NA	-0.184499	-1.53372	0.0579151	0.170704	1		0.33401	2.98879	0	6.29162e-06	0.002
HAHTOLA_SEZARY_SYNDROM_UP	NA	439	288	NA	-0.153337	-1.53357	0.0568182	0.170485	1		0.265151	2.84051	0	5.69949e-05	0.02
BURTON_ADIPOGENESIS_7	NA	442	383	NA	-0.20329	-1.53261	0.0603622	0.1709	1		0.280257	2.20535	0	0.00325336	0.844
LANDIS_ERBB2_BREAST_TUMORS_324_UP	NA	441	245	NA	-0.118466	-1.53229	0.0502008	0.170836	1		0.234307	3.19451	0	0	0
WAGNER_APO2_SENSITIVITY	NA	443	478	NA	-0.301877	-1.52986	0.0584551	0.17236	1		0.28633	1.57697	0.0602151	0.0701444	1
GUILLAUMOND_KLF10_TARGETS_DN	NA	444	442	NA	-0.265781	-1.52766	0.0725806	0.173433	1		0.287977	1.79878	0.0120968	0.0267983	1
BAE_BRCA1_TARGETS_DN	NA	445	369	NA	-0.234391	-1.52677	0.0489796	0.173841	1		0.355489	2.32386	0.0019084	0.00156615	0.562
SENESE_HDAC2_TARGETS_DN	NA	448	512	NA	-0.134336	-1.52498	0.062249	0.174949	1		0.103268	1.31137	0.169811	0.187634	1
ZHAN_MULTIPLE_MYELOMA_MF_DN	NA	447	469	NA	-0.215229	-1.52466	0.06	0.174859	1		0.214618	1.64204	0.0320513	0.053336	1
BECKER_TAMOXIFEN_RESISTANCE_DN	NA	446	504	NA	-0.205772	-1.52452	0.0666667	0.174637	1		0.168935	1.38031	0.107356	0.14837	1
TERAMOTO_OPN_TARGETS_CLUSTER_6	NA	449	411	NA	-0.267973	-1.52317	0.0766045	0.175341	1		0.317721	1.95521	0.00408163	0.0125167	1
BECKER_TAMOXIFEN_RESISTANCE_UP	NA	450	393	NA	-0.208821	-1.52249	0.0705394	0.175561	1		0.258312	2.12188	0.00396825	0.00517906	0.96
TAKAO_RESPONSE_TO_UVB_RADIATION_DN	NA	451	122	NA	-0.138142	-1.5205	0.0731707	0.176736	1		0.384892	4.33322	0	0	0
IIZUKA_LIVER_CANCER_PROGRESSION_G2_G3_UP	NA	452	413	NA	-0.278634	-1.51577	0.0661157	0.180251	1		0.322165	1.94659	0.00804829	0.0130155	1
MULLIGHAN_MLL_SIGNATURE_2_DN	NA	453	210	NA	-0.0896624	-1.51238	0.0687623	0.182362	1		0.186326	3.38724	0	0	0
SHEPARD_BMYB_MORPHOLINO_UP	NA	454	175	NA	-0.09908	-1.50953	0.0706107	0.18443	1		0.2254	3.72737	0	0	0
HOEBEKE_LYMPHOID_STEM_CELL_DN	NA	455	312	NA	-0.150997	-1.50751	0.0708502	0.185689	1		0.257819	2.75521	0	8.28549e-05	0.032
YAO_TEMPORAL_RESPONSE_TO_PROGESTERONE_CLUSTER_9	NA	456	451	NA	-0.168146	-1.50583	0.0758483	0.186787	1		0.182336	1.72295	0.0123967	0.0378553	1
MCDOWELL_ACUTE_LUNG_INJURY_DN	NA	457	428	NA	-0.222465	-1.5042	0.061753	0.187488	1		0.251404	1.8816	0.0168421	0.0180071	1
MORI_SMALL_PRE_BII_LYMPHOCYTE_UP	NA	458	346	NA	-0.159412	-1.50308	0.0648855	0.188095	1		0.248141	2.46448	0.00205339	0.000557554	0.231
TCGA_GLIOBLASTOMA_COPY_NUMBER_DN	NA	460	450	NA	-0.248933	-1.49884	0.0656064	0.190864	1		0.274132	1.72906	0.0247934	0.0368075	1
DEBIASI_APOPTOSIS_BY_REOVIRUS_INFECTION_UP	NA	459	50	NA	-0.0850471	-1.49873	0.0647773	0.190603	1		0.294183	5.50166	0	0	0
KYNG_DNA_DAMAGE_BY_GAMMA_RADIATION	NA	461	473	NA	-0.170967	-1.49795	0.0662393	0.190885	1		0.162438	1.61174	0.0262097	0.0607619	1
ZHOU_INFLAMMATORY_RESPONSE_LIVE_DN	NA	462	133	NA	-0.0785049	-1.49661	0.059448	0.191397	1		0.199876	4.16655	0	0	0
GROSS_HYPOXIA_VIA_ELK3_AND_HIF1A_UP	NA	463	214	NA	-0.113042	-1.49342	0.0846457	0.193756	1		0.240435	3.36172	0	0	0
MALONEY_RESPONSE_TO_17AAG_UP	NA	464	412	NA	-0.217762	-1.49228	0.0880503	0.194415	1		0.273211	1.95425	0.0100402	0.0125734	1
WATANABE_RECTAL_CANCER_RADIOTHERAPY_RESPONSIVE_UP	NA	465	188	NA	-0.138775	-1.49091	0.0772443	0.195288	1		0.306862	3.55812	0	0	0
GNATENKO_PLATELET_SIGNATURE	NA	467	357	NA	-0.212384	-1.48787	0.0886076	0.196877	1		0.337761	2.38708	0.00191939	0.00104109	0.408
HERNANDEZ_ABERRANT_MITOSIS_BY_DOCETACEL_2NM_DN	NA	466	432	NA	-0.276632	-1.48765	0.0727273	0.196745	1		0.327484	1.85894	0.00792079	0.020113	1
VANHARANTA_UTERINE_FIBROID_UP	NA	469	496	NA	-0.200308	-1.48585	0.0674603	0.197484	1		0.19036	1.44149	0.107356	0.118017	1
ALFANO_MYC_TARGETS	NA	468	101	NA	-0.0899694	-1.48569	0.0582707	0.197267	1		0.267544	4.69603	0	0	0
DAZARD_RESPONSE_TO_UV_NHEK_UP	NA	470	389	NA	-0.103617	-1.47903	0.0712871	0.202437	1		0.13066	2.17443	0	0.00383616	0.901
NIKOLSKY_BREAST_CANCER_6P24_P22_AMPLICON	NA	471	499	NA	-0.267789	-1.47853	0.0826613	0.202488	1		0.261673	1.41284	0.0929293	0.13134	1
OSMAN_BLADDER_CANCER_UP	NA	472	38	NA	-0.0686473	-1.4767	0.0647773	0.20377	1		0.275434	5.90048	0	0	0
CHEBOTAEV_GR_TARGETS_UP	NA	473	476	NA	-0.157196	-1.47547	0.0828157	0.204135	1		0.159519	1.58796	0.0264766	0.0669113	1
DURAND_STROMA_NS_UP	NA	474	487	NA	-0.111824	-1.47118	0.0678643	0.207409	1		0.109571	1.51802	0.0582329	0.0890279	1
WANG_IMMORTALIZED_BY_HOXA9_AND_MEIS1_DN	NA	475	507	NA	-0.281444	-1.46951	0.0789474	0.208508	1		0.238276	1.3479	0.137597	0.166138	1
BREDEMEYER_RAG_SIGNALING_NOT_VIA_ATM_UP	NA	476	508	NA	-0.179135	-1.46906	0.0831643	0.208553	1		0.147241	1.33641	0.145594	0.172508	1
LIM_MAMMARY_LUMINAL_MATURE_DN	NA	477	381	NA	-0.132086	-1.46693	0.0882957	0.210158	1		0.197478	2.22261	0	0.00294107	0.808
LEE_LIVER_CANCER_MYC_UP	NA	481	379	NA	-0.191238	-1.46479	0.0868687	0.211827	1		0.263044	2.23058	0.00201207	0.00280402	0.79
PANGAS_TUMOR_SUPPRESSION_BY_SMAD1_AND_SMAD5_UP	NA	479	194	NA	-0.119051	-1.46469	0.0807087	0.211546	1		0.278421	3.52544	0	0	0
ONGUSAHA_TP53_TARGETS	NA	478	505	NA	-0.229982	-1.46454	0.0798319	0.211299	1		0.205216	1.35972	0.126819	0.15955	1
HAHTOLA_MYCOSIS_FUNGOIDES_CD4_UP	NA	480	429	NA	-0.188033	-1.46362	0.0958333	0.211818	1		0.212606	1.87779	0.0185567	0.0183787	1
GAVIN_FOXP3_TARGETS_CLUSTER_P3	NA	482	421	NA	-0.112926	-1.46294	0.100823	0.212051	1		0.131401	1.91528	0.00828157	0.0154205	1
GRYDER_PAX3FOXO1_TOP_ENHANCERS	NA	483	14	NA	-0.0648463	-1.46171	0.0869565	0.212832	1		0.321503	7.41953	0	0	0
VERHAAK_AML_WITH_NPM1_MUTATED_DN	NA	485	407	NA	-0.0957567	-1.46108	0.0896686	0.213011	1		0.112872	2.00622	0.014	0.00961743	1
LOPEZ_MBD_TARGETS_IMPRINTED_AND_X_LINKED	NA	484	416	NA	-0.305762	-1.46079	0.0770791	0.212962	1		0.392455	1.93443	0.00787402	0.0139257	1
TONKS_TARGETS_OF_RUNX1_RUNX1T1_FUSION_SUSTAINDED_IN_ERYTHROCYTE_UP	NA	486	482	NA	-0.216182	-1.45815	0.0826613	0.215038	1		0.204325	1.55152	0.0517241	0.0779901	1
KIM_ALL_DISORDERS_OLIGODENDROCYTE_NUMBER_CORR_DN	NA	488	454	NA	-0.278107	-1.45679	0.0767717	0.215948	1		0.270693	1.70678	0.0241449	0.0406806	1
PECE_MAMMARY_STEM_CELL_UP	NA	489	183	NA	-0.12626	-1.45605	0.0761523	0.216246	1		0.287652	3.61333	0	0	0
ROVERSI_GLIOMA_LOH_REGIONS	NA	487	448	NA	-0.218303	-1.45599	0.0805785	0.215918	1		0.227906	1.75491	0.0150215	0.0330429	1
STARK_HYPPOCAMPUS_22Q11_DELETION_UP	NA	490	146	NA	-0.183629	-1.45092	0.0888889	0.220383	1		0.508855	4.05288	0	0	0
HOLLEMAN_ASPARAGINASE_RESISTANCE_B_ALL_UP	NA	491	339	NA	-0.257631	-1.44867	0.0918164	0.222201	1		0.427795	2.53149	0	0.000369859	0.151
RODRIGUES_THYROID_CARCINOMA_ANAPLASTIC_DN	NA	492	56	NA	-0.062171	-1.44737	0.0935551	0.223101	1		0.21626	5.39727	0	0	0
RAMPON_ENRICHED_LEARNING_ENVIRONMENT_LATE_UP	NA	493	438	NA	-0.262628	-1.44632	0.0879346	0.22374	1		0.342968	1.83199	0.0154143	0.022841	1
GARGALOVIC_RESPONSE_TO_OXIDIZED_PHOSPHOLIPIDS_TURQUOISE_UP	NA	494	333	NA	-0.146802	-1.445	0.0783898	0.224275	1		0.256309	2.5876	0	0.000256695	0.106
JAATINEN_HEMATOPOIETIC_STEM_CELL_UP	NA	495	252	NA	-0.0787342	-1.44383	0.09	0.224949	1		0.164972	3.16898	0	0	0
MCCABE_HOXC6_TARGETS_DN	NA	496	460	NA	-0.28035	-1.43847	0.0966469	0.229459	1		0.308928	1.6826	0.0256917	0.0448646	1
WANG_RECURRENT_LIVER_CANCER_UP	NA	498	418	NA	-0.282854	-1.43672	0.0903614	0.230791	1		0.360838	1.93058	0.00588235	0.0142001	1
ZHENG_GLIOBLASTOMA_PLASTICITY_DN	NA	497	468	NA	-0.167005	-1.43655	0.0936255	0.230554	1		0.182854	1.64296	0.0390144	0.0531847	1
CHNG_MULTIPLE_MYELOMA_HYPERPLOID_DN	NA	499	329	NA	-0.238668	-1.43457	0.0945378	0.232138	1		0.38871	2.60247	0	0.000226539	0.093
JIANG_AGING_CEREBRAL_CORTEX_UP	NA	500	320	NA	-0.220522	-1.43082	0.107143	0.235466	1		0.417551	2.69244	0	0.000109955	0.043
PROVENZANI_METASTASIS_DN	NA	501	259	NA	-0.116814	-1.43012	0.0957031	0.23574	1		0.232965	3.1188	0	0	0
GAVIN_FOXP3_TARGETS_CLUSTER_P7	NA	504	388	NA	-0.144059	-1.42655	0.0929293	0.238612	1		0.200865	2.17552	0.00573614	0.00382052	0.899
ZHAN_MULTIPLE_MYELOMA_CD1_AND_CD2_UP	NA	503	270	NA	-0.147842	-1.42623	0.0895238	0.238543	1		0.285055	2.96517	0	9.3596e-06	0.003
WANG_RESPONSE_TO_BEXAROTENE_DN	NA	502	462	NA	-0.268212	-1.42623	0.10766	0.238161	1		0.281852	1.65383	0.0388889	0.0509239	1
FALVELLA_SMOKERS_WITH_LUNG_CANCER	NA	506	423	NA	-0.15461	-1.42413	0.0983936	0.239568	1		0.190883	1.90805	0.0140845	0.0159368	1
ROZANOV_MMP14_TARGETS_DN	NA	505	483	NA	-0.236484	-1.42376	0.100394	0.23955	1		0.247949	1.54035	0.0602151	0.0813174	1
NIKOLSKY_BREAST_CANCER_7Q21_Q22_AMPLICON	NA	507	463	NA	-0.172056	-1.41837	0.083004	0.243825	1		0.183517	1.65212	0.0355731	0.0512431	1
HOSHIDA_LIVER_CANCER_SUBCLASS_S1	NA	508	193	NA	-0.0881001	-1.41576	0.0992366	0.246023	1		0.205119	3.5255	0	0	0
SARRIO_EPITHELIAL_MESENCHYMAL_TRANSITION_DN	NA	509	470	NA	-0.117748	-1.41479	0.115385	0.246642	1		0.124718	1.64163	0.03861	0.0534045	1
CHEN_LVAD_SUPPORT_OF_FAILING_HEART_UP	NA	510	479	NA	-0.14263	-1.41368	0.0942623	0.247337	1		0.141682	1.57117	0.0320641	0.0718827	1
FLECHNER_PBL_KIDNEY_TRANSPLANT_OK_VS_DONOR_UP	NA	511	112	NA	-0.105249	-1.4132	0.102669	0.247395	1		0.332006	4.55848	0	0	0
BRUINS_UVC_RESPONSE_VIA_TP53_GROUP_B	NA	512	197	NA	-0.0618788	-1.41244	0.102616	0.247752	1		0.139363	3.49125	0	0	0
EPPERT_PROGENITOR	NA	514	179	NA	-0.111274	-1.41127	0.0901804	0.248497	1		0.280721	3.67097	0	0	0
GROSS_ELK3_TARGETS_DN	NA	513	492	NA	-0.233557	-1.41103	0.121901	0.248343	1		0.218941	1.46245	0.0836735	0.109448	1
ELVIDGE_HIF1A_AND_HIF2A_TARGETS_DN	NA	516	440	NA	-0.131265	-1.40969	0.10101	0.249241	1		0.160061	1.81362	0.0160643	0.0250235	1
SCHUHMACHER_MYC_TARGETS_UP	NA	515	117	NA	-0.138816	-1.40949	0.104839	0.249074	1		0.438766	4.41754	0	0	0
SMID_BREAST_CANCER_RELAPSE_IN_BONE_DN	NA	517	417	NA	-0.0863922	-1.40824	0.10352	0.24957	1		0.0986325	1.93287	0.00784314	0.0140135	1
EHLERS_ANEUPLOIDY_UP	NA	518	337	NA	-0.210787	-1.40587	0.10124	0.249981	1		0.353195	2.5504	0	0.00032521	0.134

## Sheet: c5bp
	EZH2_KnockDown ranks		EZH2_Y641F ranks		EZH2_KnockDown						EZH2_Y641F
NAME	Rank EZH2_KD_positive	Rank EZH2_KD_negative	Rank EZH2_Y641_positive	Rank EZH2_Y641_negative	ES	NES	NOM p-val	FDR q-val	FWER p-val		ES	NES	NOM p-val	FDR q-val	FWER p-val
GO_MEIOSIS_I_CELL_CYCLE_PROCESS	1	NA	NA	12	0.349248	3.27427	0	0	0		-0.188081	-2.17855	0	0.0310793	0.963
GO_REGIONALIZATION	2	NA	NA	28	0.182082	3.07076	0	0.00018444	0.004		-0.0827416	-1.76175	0.0194932	0.14598	1
GO_LYMPHOCYTE_DIFFERENTIATION	3	NA	NA	52	0.167196	3.02989	0	0.000251743	0.006		-0.0773708	-1.57229	0.0492126	0.229318	1
GO_PATTERN_SPECIFICATION_PROCESS	4	NA	NA	29	0.157418	2.93009	0	0.000514168	0.014		-0.0766237	-1.75763	0.0226804	0.146998	1
GO_ANTERIOR_POSTERIOR_PATTERN_SPECIFICATION	5	NA	NA	49	0.224697	2.928	0	0.000493601	0.014		-0.0964095	-1.60014	0.0488722	0.213269	1
GO_MEIOTIC_CELL_CYCLE_PROCESS	6	NA	NA	50	0.234306	2.87296	0	0.000608553	0.02		-0.106331	-1.58434	0.0529532	0.222549	1
GO_ADAPTIVE_IMMUNE_RESPONSE	7	NA	NA	9	0.168292	2.85296	0	0.000735468	0.025		-0.116141	-2.40837	0	0.00897254	0.513
GO_CELL_FATE_COMMITMENT	8	NA	NA	2	0.200038	2.85038	0	0.000711743	0.025		-0.196063	-3.68329	0	0	0
GO_EMBRYONIC_ORGAN_DEVELOPMENT	9	NA	NA	13	0.143984	2.80661	0	0.000787042	0.033		-0.0929159	-2.17643	0.00212314	0.0294854	0.965
GO_CHROMOSOME_ORGANIZATION_INVOLVED_IN_MEIOTIC_CELL_CYCLE	10	NA	NA	35	0.382225	2.6854	0	0.00116769	0.068		-0.190699	-1.69514	0.0367505	0.169944	1
GO_MEIOTIC_CHROMOSOME_SEGREGATION	11	NA	NA	43	0.31653	2.60777	0	0.00183475	0.112		-0.16257	-1.63041	0.0337302	0.204605	1
GO_T_CELL_ACTIVATION_INVOLVED_IN_IMMUNE_RESPONSE	12	NA	NA	26	0.265	2.44981	0	0.00454043	0.329		-0.16461	-1.78432	0.0205761	0.135098	1
GO_MICROTUBULE_BUNDLE_FORMATION	13	NA	NA	17	0.254167	2.30152	0	0.0110726	0.728		-0.18054	-2.02722	0	0.0573586	0.999
GO_ADAPTIVE_IMMUNE_RESPONSE_BASED_ON_SOMATIC_RECOMBINATION_OF_IMMUNE_RECEPTORS_BUILT_FROM_IMMUNOGLOBULIN_SUPERFAMILY_DOMAINS	14	NA	NA	33	0.163046	2.29578	0	0.0113669	0.742		-0.103879	-1.71126	0.0322581	0.161545	1
GO_T_CELL_DIFFERENTIATION	15	NA	NA	53	0.15618	2.29062	0	0.0113346	0.753		-0.0921296	-1.57115	0.0452675	0.229534	1
GO_COLUMNAR_CUBOIDAL_EPITHELIAL_CELL_DIFFERENTIATION	16	NA	NA	36	0.215717	2.18721	0.00209205	0.0186428	0.932		-0.139473	-1.67085	0.025	0.185138	1
GO_T_CELL_DIFFERENTIATION_INVOLVED_IN_IMMUNE_RESPONSE	17	NA	NA	27	0.267368	2.14045	0	0.0242487	0.971		-0.18858	-1.77755	0.0136187	0.137908	1
GO_HOMOLOGOUS_CHROMOSOME_SEGREGATION	18	NA	NA	18	0.345521	2.10885	0	0.0278768	0.989		-0.245599	-2.0248	0.00197239	0.057487	0.999
GO_CELL_FATE_SPECIFICATION	19	NA	NA	3	0.264572	2.09979	0.00199203	0.0287735	0.99		-0.281236	-3.22446	0	4.05722e-05	0.001
GO_CILIUM_MOVEMENT	20	NA	NA	5	0.303749	2.08733	0.00422833	0.028889	0.995		-0.306407	-2.88806	0	0.000233841	0.008
GO_HEART_MORPHOGENESIS	21	NA	NA	20	0.132765	2.0439	0.00630252	0.0354321	0.999		-0.105333	-1.95025	0.00595238	0.0794303	1
GO_EMBRYONIC_ORGAN_MORPHOGENESIS	22	NA	NA	16	0.128598	2.04315	0.00816326	0.0353849	0.999		-0.108704	-2.07604	0.00397614	0.0467774	0.998
GO_MESODERM_DEVELOPMENT	23	NA	NA	51	0.192099	2.03361	0.0059761	0.0365394	1		-0.122971	-1.58211	0.0555556	0.220963	1
GO_EAR_MORPHOGENESIS	24	NA	NA	40	0.196235	1.98453	0.00198413	0.0449876	1		-0.128588	-1.63644	0.0392157	0.203002	1
GO_CD4_POSITIVE_ALPHA_BETA_T_CELL_DIFFERENTIATION	25	NA	NA	46	0.22681	1.9016	0.00761905	0.0653323	1		-0.165481	-1.61	0.037182	0.210219	1
GO_SYNAPSIS	26	NA	NA	10	0.360773	1.88948	0.00809717	0.068375	1		-0.307856	-2.30908	0.00191571	0.015857	0.778
GO_AXIS_SPECIFICATION	27	NA	NA	54	0.21118	1.88726	0.0100402	0.0683379	1		-0.146144	-1.55988	0.0518234	0.24007	1
GO_INNER_EAR_MORPHOGENESIS	28	NA	NA	31	0.204792	1.88143	0.00581395	0.0702658	1		-0.147169	-1.73853	0.0293542	0.155635	1
GO_MYOBLAST_DIFFERENTIATION	29	NA	NA	56	0.210062	1.86354	0.0103093	0.074505	1		-0.1437	-1.54797	0.0661323	0.24707	1
GO_LYMPHOCYTE_MEDIATED_IMMUNITY	30	NA	NA	48	0.135589	1.79579	0.00614754	0.0935819	1		-0.0980856	-1.60182	0.0474308	0.212552	1
GO_SKELETAL_MUSCLE_ORGAN_DEVELOPMENT	31	NA	NA	19	0.147388	1.76336	0.0287356	0.104952	1		-0.133861	-1.97601	0.00200401	0.0721797	1
GO_DEFENSE_RESPONSE_TO_GRAM_POSITIVE_BACTERIUM	32	NA	NA	23	0.257193	1.76099	0.0327198	0.105894	1		-0.190518	-1.86452	0.00381679	0.109572	1
GO_CARDIAC_MUSCLE_TISSUE_MORPHOGENESIS	33	NA	NA	38	0.220394	1.73082	0.0175439	0.118293	1		-0.175574	-1.6494	0.0275049	0.19649	1
GO_CELLULAR_PROCESS_INVOLVED_IN_REPRODUCTION_IN_MULTICELLULAR_ORGANISM	34	NA	NA	6	0.108755	1.72389	0.0162933	0.12018	1		-0.128848	-2.72279	0	0.00113758	0.047
GO_SPERM_MOTILITY	35	NA	NA	14	0.260035	1.71096	0.0235756	0.125013	1		-0.20662	-2.11148	0.00580271	0.0413272	0.994
GO_CELL_DIFFERENTIATION_INVOLVED_IN_EMBRYONIC_PLACENTA_DEVELOPMENT	36	NA	NA	8	0.327617	1.70666	0.0440882	0.126986	1		-0.392692	-2.51295	0	0.00561839	0.289
GO_REGULATION_OF_LEUKOCYTE_PROLIFERATION	37	NA	NA	25	0.127979	1.70368	0.0292398	0.128146	1		-0.111566	-1.80778	0.014	0.127628	1
GO_LEUKOCYTE_PROLIFERATION	38	NA	NA	44	0.111163	1.6811	0.0280561	0.136966	1		-0.087355	-1.62733	0.0310078	0.205504	1
GO_MALE_MEIOTIC_NUCLEAR_DIVISION	39	NA	NA	15	0.297299	1.65866	0.031068	0.149508	1		-0.271517	-2.09158	0	0.0449843	0.998
GO_AXONEME_ASSEMBLY	40	NA	NA	4	0.249013	1.65293	0.035503	0.152075	1		-0.339468	-3.01716	0	0.00010433	0.003
GO_EMBRYONIC_FORELIMB_MORPHOGENESIS	41	NA	NA	32	0.352826	1.65141	0.0348162	0.152836	1		-0.2664	-1.73382	0.0232558	0.158331	1
GO_T_CELL_SELECTION	42	NA	NA	22	0.283621	1.64971	0.0365385	0.153218	1		-0.237602	-1.87145	0.0139165	0.10851	1
GO_GLAND_DEVELOPMENT	43	NA	NA	30	0.0793012	1.62277	0.0431373	0.165209	1		-0.0734509	-1.7545	0.019084	0.148383	1
GO_SKELETAL_SYSTEM_MORPHOGENESIS	44	NA	NA	34	0.108652	1.61943	0.0408163	0.167025	1		-0.0944525	-1.69577	0.0263653	0.171424	1
GO_CELL_FATE_DETERMINATION	45	NA	NA	37	0.266576	1.61822	0.0446247	0.166652	1		-0.219487	-1.65242	0.0383838	0.194567	1
GO_CILIUM_OR_FLAGELLUM_DEPENDENT_CELL_MOTILITY	46	NA	NA	11	0.206245	1.60883	0.0474308	0.170012	1		-0.195561	-2.26536	0.00204499	0.0196201	0.86
GO_NEGATIVE_REGULATION_OF_CELL_CELL_ADHESION	47	NA	NA	47	0.124263	1.60605	0.0393375	0.170514	1		-0.106988	-1.60976	0.0383065	0.209499	1
GO_SENSORY_ORGAN_MORPHOGENESIS	48	NA	NA	24	0.105122	1.59348	0.0606061	0.177572	1		-0.0995519	-1.84169	0.0136187	0.116426	1
GO_REGULATION_OF_CELL_CELL_ADHESION	49	NA	NA	45	0.0842932	1.5896	0.0530452	0.180059	1		-0.0723509	-1.61518	0.0350877	0.211134	1
GO_FORELIMB_MORPHOGENESIS	50	NA	NA	55	0.286213	1.57744	0.0472441	0.186958	1		-0.212017	-1.54907	0.0674603	0.246929	1
GO_DNA_METHYLATION	51	NA	NA	41	0.197573	1.56163	0.0566802	0.195899	1		-0.173339	-1.63484	0.0285171	0.203436	1
GO_EPIDERMAL_CELL_DIFFERENTIATION	52	NA	NA	1	0.127438	1.54304	0.0519751	0.20712	1		-0.22968	-4.29255	0	0	0
GO_SARCOMERE_ORGANIZATION	53	NA	NA	21	0.261891	1.50371	0.0781893	0.232066	1		-0.245647	-1.91969	0.00618557	0.0896163	1
GO_CARDIAC_SEPTUM_MORPHOGENESIS	54	NA	NA	42	0.164876	1.49619	0.0667976	0.236654	1		-0.165991	-1.63139	0.0250965	0.204755	1
GO_MESODERMAL_CELL_DIFFERENTIATION	55	NA	NA	39	0.280469	1.48535	0.0669291	0.242865	1		-0.239061	-1.64743	0.0325866	0.196362	1
GO_DEFENSE_RESPONSE_TO_BACTERIUM	56	NA	NA	7	0.135627	1.4723	0.0690979	0.248393	1		-0.17045	-2.61303	0	0.00313175	0.137
GO_ACETYL_COA_BIOSYNTHETIC_PROCESS	NA	447	434	NA	-0.288806	-1.62205	0.0389105	0.152723	1		0.385335	2.17604	0	0.00392826	0.96
GO_ACETYL_COA_BIOSYNTHETIC_PROCESS_FROM_PYRUVATE	NA	383	491	NA	-0.366298	-1.70128	0.0298507	0.119741	1		0.389897	1.89102	0.0128755	0.0185628	1
GO_ACIDIC_AMINO_ACID_TRANSPORT	NA	76	229	NA	-0.291685	-2.52317	0	0.00309179	0.218		0.336043	3.26428	0	2.94176e-06	0.001
GO_ACTIN_FILAMENT_DEPOLYMERIZATION	NA	144	431	NA	-0.286214	-2.21525	0.00421053	0.015803	0.904		0.262222	2.19956	0.00581395	0.00343149	0.934
GO_ACTIN_FILAMENT_POLYMERIZATION	NA	325	126	NA	-0.132137	-1.79481	0.0103734	0.0865126	1		0.279774	4.13188	0	0	0
GO_ACTIN_NUCLEATION	NA	246	207	NA	-0.263063	-1.9289	0.00847458	0.0540251	1		0.454505	3.51725	0	0	0
GO_ACTIN_POLYMERIZATION_OR_DEPOLYMERIZATION	NA	226	99	NA	-0.130853	-1.97013	0.0020284	0.046384	1		0.29133	4.51515	0	0	0
GO_ACTION_POTENTIAL	NA	519	428	NA	-0.137432	-1.53237	0.0591716	0.194736	1		0.169959	2.22003	0	0.00303433	0.915
GO_ACTIVATION_OF_PROTEIN_KINASE_B_ACTIVITY	NA	586	525	NA	-0.24913	-1.44858	0.0934959	0.245312	1		0.265023	1.75481	0.023622	0.0352498	1
GO_ADENYLATE_CYCLASE_INHIBITING_G_PROTEIN_COUPLED_RECEPTOR_SIGNALING_PATHWAY	NA	462	399	NA	-0.197202	-1.59616	0.042471	0.166434	1		0.231447	2.35872	0	0.00128864	0.613
GO_ADULT_BEHAVIOR	NA	116	362	NA	-0.201674	-2.34268	0	0.00814339	0.642		0.188767	2.5577	0	0.000352752	0.204
GO_ADULT_LOCOMOTORY_BEHAVIOR	NA	105	377	NA	-0.261324	-2.37005	0	0.0073275	0.569		0.253148	2.47083	0	0.000604628	0.337
GO_AEROBIC_RESPIRATION	NA	83	133	NA	-0.250687	-2.49346	0	0.00360408	0.275		0.401298	4.08144	0	0	0
GO_AGING	NA	436	176	NA	-0.0932992	-1.63949	0.0321932	0.143635	1		0.188279	3.76058	0	0	0
GO_ALCOHOL_METABOLIC_PROCESS	NA	333	295	NA	-0.097707	-1.78729	0.0241935	0.0881052	1		0.135453	2.901	0	3.57759e-05	0.017
GO_AMINE_METABOLIC_PROCESS	NA	189	317	NA	-0.176715	-2.06598	0.00403226	0.0313905	0.999		0.207022	2.80081	0	7.4717e-05	0.038
GO_AMINE_TRANSPORT	NA	225	516	NA	-0.238883	-1.97083	0	0.0463346	1		0.161152	1.79356	0.0163265	0.0295015	1
GO_AMINO_ACID_IMPORT	NA	41	310	NA	-0.483601	-2.80426	0	0.000571397	0.022		0.476722	2.84434	0	5.56638e-05	0.028
GO_AMINO_ACID_TRANSMEMBRANE_TRANSPORT	NA	209	364	NA	-0.218017	-2.00404	0.0060241	0.0407751	1		0.245038	2.5549	0	0.000357967	0.208
GO_AMINO_ACID_TRANSPORT	NA	172	233	NA	-0.17769	-2.09521	0.00408998	0.0287037	0.994		0.241023	3.23789	0	2.88497e-06	0.001
GO_AMMONIUM_ION_METABOLIC_PROCESS	NA	192	458	NA	-0.146968	-2.05697	0.00204499	0.0325039	0.999		0.129363	2.05193	0.0019802	0.00821109	0.999
GO_AMYLOID_BETA_METABOLIC_PROCESS	NA	488	356	NA	-0.211495	-1.56568	0.0493359	0.179755	1		0.325151	2.59033	0	0.000295481	0.17
GO_ANION_TRANSMEMBRANE_TRANSPORT	NA	95	474	NA	-0.148255	-2.41625	0	0.00572483	0.446		0.103806	1.99279	0.00380228	0.0110686	1
GO_ANTEROGRADE_AXONAL_TRANSPORT	NA	131	107	NA	-0.291317	-2.26754	0	0.0121882	0.817		0.540422	4.42764	0	0	0
GO_ANTIBIOTIC_METABOLIC_PROCESS	NA	139	546	NA	-0.245736	-2.2264	0.00394477	0.0152159	0.887		0.146227	1.64126	0.0601202	0.0582431	1
GO_ANTIGEN_PROCESSING_AND_PRESENTATION	NA	30	54	NA	-0.183223	-2.86623	0	0.000541184	0.015		0.331	5.3856	0	0	0
GO_ANTIGEN_PROCESSING_AND_PRESENTATION_OF_PEPTIDE_ANTIGEN	NA	66	52	NA	-0.183805	-2.60599	0	0.00216793	0.134		0.362429	5.41924	0	0	0
GO_ANTIGEN_PROCESSING_AND_PRESENTATION_OF_PEPTIDE_ANTIGEN_VIA_MHC_CLASS_I	NA	499	155	NA	-0.145741	-1.55487	0.05	0.18362	1		0.369693	3.94605	0	0	0
GO_ANTIGEN_PROCESSING_AND_PRESENTATION_OF_PEPTIDE_OR_POLYSACCHARIDE_ANTIGEN_VIA_MHC_CLASS_II	NA	90	150	NA	-0.236505	-2.43408	0	0.00529107	0.403		0.369704	3.97613	0	0	0
GO_ANTIGEN_RECEPTOR_MEDIATED_SIGNALING_PATHWAY	NA	448	252	NA	-0.110204	-1.622	0.0352941	0.152463	1		0.184771	3.12785	0	1.043e-05	0.004
GO_APOPTOTIC_MITOCHONDRIAL_CHANGES	NA	475	159	NA	-0.136379	-1.57908	0.0518672	0.174492	1		0.317797	3.92469	0	0	0
GO_ARP2_3_COMPLEX_MEDIATED_ACTIN_NUCLEATION	NA	344	221	NA	-0.269193	-1.76846	0.0253165	0.0944264	1		0.507596	3.36177	0	3.13295e-06	0.001
GO_ASPARTATE_FAMILY_AMINO_ACID_METABOLIC_PROCESS	NA	449	585	NA	-0.236261	-1.62099	0.0428571	0.152867	1		0.167837	1.37209	0.136364	0.16419	1
GO_ASSOCIATIVE_LEARNING	NA	243	187	NA	-0.220576	-1.94022	0.0040568	0.0514129	1		0.360346	3.63779	0	0	0
GO_ATP_METABOLIC_PROCESS	NA	145	47	NA	-0.127261	-2.21345	0	0.0158558	0.906		0.29414	5.49989	0	0	0
GO_ATP_SYNTHESIS_COUPLED_ELECTRON_TRANSPORT	NA	9	62	NA	-0.319635	-3.34409	0	0	0		0.493033	5.30186	0	0	0
GO_AUTOPHAGOSOME_MATURATION	NA	497	306	NA	-0.230453	-1.55653	0.0392562	0.183519	1		0.414824	2.86158	0	4.64194e-05	0.023
GO_AUTOPHAGOSOME_ORGANIZATION	NA	42	73	NA	-0.259239	-2.79256	0	0.000609474	0.024		0.46	5.0543	0	0	0
GO_AUTOPHAGY_OF_MITOCHONDRION	NA	417	110	NA	-0.177504	-1.66796	0.0176471	0.131167	1		0.444666	4.39025	0	0	0
GO_AXO_DENDRITIC_TRANSPORT	NA	111	74	NA	-0.245982	-2.34854	0	0.00810981	0.622		0.52175	5.021	0	0	0
GO_BARBED_END_ACTIN_FILAMENT_CAPPING	NA	121	395	NA	-0.479939	-2.31706	0	0.00955993	0.71		0.463334	2.36493	0	0.00124221	0.599
GO_BASEMENT_MEMBRANE_ORGANIZATION	NA	268	423	NA	-0.333523	-1.89611	0.0121704	0.0600407	1		0.346417	2.23313	0	0.00281518	0.898
GO_BRANCHED_CHAIN_AMINO_ACID_METABOLIC_PROCESS	NA	134	560	NA	-0.415258	-2.25054	0	0.0133467	0.844		0.287965	1.55037	0.0561555	0.0842124	1
GO_C4_DICARBOXYLATE_TRANSPORT	NA	312	598	NA	-0.360234	-1.81174	0.0160321	0.0821501	1		0.230995	1.27415	0.177165	0.227138	1
GO_CALCIUM_DEPENDENT_CELL_CELL_ADHESION_VIA_PLASMA_MEMBRANE_CELL_ADHESION_MOLECULES	NA	81	579	NA	-0.339435	-2.49656	0	0.00362003	0.27		0.175924	1.41929	0.112016	0.138913	1
GO_CALCIUM_ION_TRANSMEMBRANE_TRANSPORT	NA	467	388	NA	-0.0930055	-1.58879	0.0441767	0.170788	1		0.120265	2.41251	0	0.000900383	0.475
GO_CARBOHYDRATE_DERIVATIVE_CATABOLIC_PROCESS	NA	281	413	NA	-0.135696	-1.87699	0.00972763	0.0639415	1		0.148691	2.27167	0.0020284	0.00224642	0.831
GO_CELL_COMMUNICATION_BY_ELECTRICAL_COUPLING	NA	269	571	NA	-0.316111	-1.89417	0.0114723	0.0605248	1		0.222378	1.48627	0.0764192	0.108619	1
GO_CELL_COMMUNICATION_BY_ELECTRICAL_COUPLING_INVOLVED_IN_CARDIAC_CONDUCTION	NA	375	595	NA	-0.324362	-1.7164	0.0160966	0.112924	1		0.221737	1.30234	0.150905	0.206534	1
GO_CELL_REDOX_HOMEOSTASIS	NA	149	327	NA	-0.235813	-2.19986	0	0.0169211	0.927		0.279903	2.73383	0	0.000111124	0.058
GO_CELLULAR_AMINO_ACID_BIOSYNTHETIC_PROCESS	NA	277	459	NA	-0.203735	-1.88529	0.00959693	0.0620546	1		0.200093	2.0466	0.002	0.00843549	0.999
GO_CELLULAR_AMINO_ACID_METABOLIC_PROCESS	NA	87	258	NA	-0.13806	-2.44876	0	0.00494082	0.367		0.153167	3.07925	0	1.00248e-05	0.004
GO_CELLULAR_DETOXIFICATION	NA	174	584	NA	-0.217224	-2.09262	0.00204499	0.0287375	0.994		0.12171	1.37307	0.112871	0.163765	1
GO_CELLULAR_IRON_ION_HOMEOSTASIS	NA	334	329	NA	-0.227511	-1.78468	0.0191939	0.0891173	1		0.312951	2.71337	0	0.000120587	0.063
GO_CELLULAR_KETONE_METABOLIC_PROCESS	NA	233	206	NA	-0.129546	-1.95382	0.00990099	0.049502	1		0.199771	3.51947	0	0	0
GO_CELLULAR_LIPID_CATABOLIC_PROCESS	NA	167	359	NA	-0.148605	-2.11287	0.00408163	0.0266497	0.988		0.155704	2.57964	0	0.000308017	0.178
GO_CELLULAR_MODIFIED_AMINO_ACID_METABOLIC_PROCESS	NA	120	601	NA	-0.177187	-2.32132	0.00195695	0.00930586	0.697		0.0824737	1.25761	0.201581	0.239154	1
GO_CELLULAR_MONOVALENT_INORGANIC_CATION_HOMEOSTASIS	NA	28	499	NA	-0.306581	-2.92599	0	0.000268988	0.007		0.156861	1.85361	0.0184805	0.0222034	1
GO_CELLULAR_PROTEIN_COMPLEX_DISASSEMBLY	NA	23	20	NA	-0.182896	-3.05629	0	4.78729e-05	0.001		0.369373	6.32915	0	0	0
GO_CELLULAR_RESPIRATION	NA	10	40	NA	-0.230397	-3.32592	0	0	0		0.373665	5.67452	0	0	0
GO_CELLULAR_RESPONSE_TO_INSULIN_STIMULUS	NA	295	266	NA	-0.125125	-1.84528	0.0119284	0.0726791	1		0.18252	3.05429	0	9.77704e-06	0.004
GO_CELLULAR_RESPONSE_TO_LIPOPROTEIN_PARTICLE_STIMULUS	NA	310	468	NA	-0.301685	-1.81391	0.0153551	0.0815987	1		0.300656	2.0147	0	0.00991927	0.999
GO_CELLULAR_RESPONSE_TO_LOW_DENSITY_LIPOPROTEIN_PARTICLE_STIMULUS	NA	550	554	NA	-0.324751	-1.49302	0.0736842	0.217327	1		0.292692	1.5839	0.055336	0.0735142	1
GO_CELLULAR_RESPONSE_TO_PEPTIDE	NA	520	200	NA	-0.0789666	-1.53069	0.046371	0.195928	1		0.162591	3.57521	0	0	0
GO_CELLULAR_RESPONSE_TO_PEPTIDE_HORMONE_STIMULUS	NA	498	246	NA	-0.0886525	-1.55587	0.0587045	0.183743	1		0.161952	3.14977	0	8.02113e-06	0.003
GO_CELLULAR_RESPONSE_TO_STARVATION	NA	441	166	NA	-0.128644	-1.63132	0.0362595	0.147788	1		0.292269	3.87609	0	0	0
GO_CELLULAR_TRANSITION_METAL_ION_HOMEOSTASIS	NA	80	290	NA	-0.252176	-2.50179	0.00194553	0.00351282	0.259		0.262871	2.92711	0	3.21896e-05	0.015
GO_CERAMIDE_CATABOLIC_PROCESS	NA	392	543	NA	-0.34522	-1.69078	0.0336634	0.12376	1		0.329158	1.67307	0.0448343	0.0507784	1
GO_CERAMIDE_METABOLIC_PROCESS	NA	179	256	NA	-0.206377	-2.08618	0	0.0291677	0.995		0.288726	3.084	0	1.00758e-05	0.004
GO_CHAPERONE_MEDIATED_AUTOPHAGY	NA	331	379	NA	-0.364519	-1.78957	0.0144928	0.0875152	1		0.512197	2.46576	0	0.000627293	0.348
GO_CLATHRIN_COAT_ASSEMBLY	NA	454	321	NA	-0.315906	-1.61135	0.0599613	0.157794	1		0.547649	2.76727	0	9.97436e-05	0.051
GO_COAGULATION	NA	291	498	NA	-0.106309	-1.8571	0.012	0.0690664	1		0.0923424	1.85622	0.0060241	0.021935	1
GO_COENZYME_BIOSYNTHETIC_PROCESS	NA	425	281	NA	-0.128552	-1.65795	0.0301205	0.135441	1		0.221511	2.97111	0	2.27942e-05	0.01
GO_COENZYME_METABOLIC_PROCESS	NA	102	228	NA	-0.149277	-2.38923	0	0.00655527	0.521		0.182247	3.26507	0	2.94757e-06	0.001
GO_COFACTOR_BIOSYNTHETIC_PROCESS	NA	122	123	NA	-0.144406	-2.3161	0.00210526	0.00955588	0.713		0.239203	4.15371	0	0	0
GO_COFACTOR_METABOLIC_PROCESS	NA	8	113	NA	-0.164844	-3.36754	0	0	0		0.187722	4.33692	0	0	0
GO_COGNITION	NA	33	69	NA	-0.162001	-2.85598	0	0.000493432	0.015		0.264027	5.14829	0	0	0
GO_COPII_COATED_VESICLE_BUDDING	NA	72	118	NA	-0.278053	-2.57279	0.00200803	0.0023852	0.165		0.430674	4.21345	0	0	0
GO_CYTOCHROME_COMPLEX_ASSEMBLY	NA	315	357	NA	-0.281712	-1.80981	0.0122699	0.0823467	1		0.388322	2.58101	0	0.000309704	0.178
GO_CYTOKINESIS	NA	574	111	NA	-0.111252	-1.45759	0.0903614	0.241905	1		0.312086	4.38661	0	0	0
GO_CYTOPLASMIC_TRANSLATION	NA	445	132	NA	-0.153741	-1.62441	0.0469388	0.151524	1		0.370113	4.08394	0	0	0
GO_CYTOPLASMIC_TRANSLATIONAL_INITIATION	NA	490	218	NA	-0.247694	-1.56437	0.0658683	0.180182	1		0.566157	3.42906	0	0	0
GO_CYTOSKELETON_DEPENDENT_INTRACELLULAR_TRANSPORT	NA	313	30	NA	-0.122866	-1.81051	0.0119284	0.0824811	1		0.387298	5.93574	0	0	0
GO_CYTOSOLIC_TRANSPORT	NA	464	42	NA	-0.116886	-1.59169	0.0327553	0.169496	1		0.411779	5.6021	0	0	0
GO_DE_NOVO_PROTEIN_FOLDING	NA	596	169	NA	-0.205876	-1.44054	0.0862745	0.249331	1		0.537175	3.82322	0	0	0
GO_DENDRITE_MORPHOGENESIS	NA	242	51	NA	-0.144598	-1.94205	0.00595238	0.0511273	1		0.396258	5.42968	0	0	0
GO_DICARBOXYLIC_ACID_TRANSPORT	NA	208	477	NA	-0.218378	-2.01253	0.00590551	0.0390396	1		0.176448	1.96289	0.00773694	0.012948	1
GO_DIVALENT_INORGANIC_CATION_HOMEOSTASIS	NA	299	505	NA	-0.0882769	-1.8398	0.0101833	0.0740778	1		0.0724407	1.83668	0.00963391	0.0239988	1
GO_DIVALENT_INORGANIC_CATION_TRANSPORT	NA	201	265	NA	-0.0958068	-2.02699	0.002	0.0372671	1		0.126238	3.05512	0	9.79317e-06	0.004
GO_DRUG_METABOLIC_PROCESS	NA	20	336	NA	-0.145224	-3.14661	0	0	0		0.101761	2.68143	0	0.000144824	0.077
GO_DRUG_TRANSMEMBRANE_TRANSPORT	NA	77	517	NA	-0.294105	-2.5177	0	0.00316048	0.225		0.180231	1.79252	0.0107296	0.0296636	1
GO_DRUG_TRANSPORT	NA	57	582	NA	-0.213271	-2.67345	0	0.0014168	0.077		0.0906994	1.39676	0.107784	0.15065	1
GO_ELECTRON_TRANSPORT_CHAIN	NA	17	103	NA	-0.23393	-3.2029	0	0	0		0.305176	4.48351	0	0	0
GO_ENDOMEMBRANE_SYSTEM_ORGANIZATION	NA	78	16	NA	-0.119158	-2.51645	0	0.00317594	0.229		0.281352	6.49215	0	0	0
GO_ENDOPLASMIC_RETICULUM_CALCIUM_ION_HOMEOSTASIS	NA	288	442	NA	-0.346123	-1.86235	0.00591716	0.0678076	1		0.382166	2.14475	0.00201613	0.00477272	0.976
GO_ENDOPLASMIC_RETICULUM_TO_GOLGI_VESICLE_MEDIATED_TRANSPORT	NA	3	34	NA	-0.243883	-3.74905	0	0	0		0.357081	5.80238	0	0	0
GO_ENDOSOMAL_TRANSPORT	NA	46	23	NA	-0.170824	-2.76213	0	0.000723803	0.031		0.37276	6.11751	0	0	0
GO_ENDOSOME_ORGANIZATION	NA	165	148	NA	-0.229813	-2.14071	0	0.0226358	0.971		0.404948	3.97762	0	0	0
GO_ENDOSOME_TO_LYSOSOME_TRANSPORT	NA	481	241	NA	-0.192311	-1.57356	0.044316	0.176133	1		0.367702	3.17448	0	5.49387e-06	0.002
GO_ENERGY_DERIVATION_BY_OXIDATION_OF_ORGANIC_COMPOUNDS	NA	38	35	NA	-0.165845	-2.82725	0	0.000529817	0.019		0.311066	5.7494	0	0	0
GO_ENSHEATHMENT_OF_NEURONS	NA	384	86	NA	-0.133186	-1.70028	0.0275591	0.120045	1		0.359497	4.7772	0	0	0
GO_EPIDERMAL_GROWTH_FACTOR_RECEPTOR_SIGNALING_PATHWAY	NA	566	366	NA	-0.132618	-1.46849	0.0891089	0.234595	1		0.201248	2.53199	0	0.000431808	0.245
GO_ER_NUCLEUS_SIGNALING_PATHWAY	NA	510	308	NA	-0.204092	-1.54458	0.064833	0.188307	1		0.367112	2.85148	0	4.99119e-05	0.025
GO_ERAD_PATHWAY	NA	182	90	NA	-0.191177	-2.07599	0.00203252	0.0305676	0.997		0.41834	4.6852	0	0	0
GO_ERBB_SIGNALING_PATHWAY	NA	446	285	NA	-0.128546	-1.62401	0.0403226	0.151582	1		0.218133	2.95145	0	2.45858e-05	0.011
GO_ESTABLISHMENT_OF_MITOCHONDRION_LOCALIZATION	NA	317	331	NA	-0.308032	-1.8079	0.015534	0.0827459	1		0.475891	2.70232	0	0.000126515	0.067
GO_ESTABLISHMENT_OF_ORGANELLE_LOCALIZATION	NA	125	9	NA	-0.106772	-2.30422	0	0.0100961	0.738		0.311398	7.07108	0	0	0
GO_ESTABLISHMENT_OF_PIGMENT_GRANULE_LOCALIZATION	NA	153	558	NA	-0.414315	-2.19	0	0.0177259	0.944		0.270142	1.55934	0.0491803	0.0812912	1
GO_ESTABLISHMENT_OF_PROTEIN_LOCALIZATION_TO_MEMBRANE	NA	140	25	NA	-0.115513	-2.22372	0	0.0153569	0.892		0.302424	6.00098	0	0	0
GO_ESTABLISHMENT_OF_PROTEIN_LOCALIZATION_TO_VACUOLE	NA	530	185	NA	-0.202549	-1.51365	0.0604839	0.206926	1		0.451246	3.65676	0	0	0
GO_ESTABLISHMENT_OR_MAINTENANCE_OF_CELL_POLARITY	NA	526	121	NA	-0.0950372	-1.51952	0.0606061	0.2031	1		0.244548	4.18303	0	0	0
GO_EXOCYTIC_PROCESS	NA	221	163	NA	-0.197497	-1.976	0.00387597	0.0454165	1		0.36459	3.89299	0	0	0
GO_FATTY_ACID_BETA_OXIDATION	NA	340	441	NA	-0.194085	-1.77635	0.0178571	0.0913783	1		0.224317	2.15109	0.0038835	0.00459705	0.973
GO_FATTY_ACID_CATABOLIC_PROCESS	NA	175	452	NA	-0.198087	-2.0905	0.00400802	0.0289838	0.995		0.179475	2.0814	0.00196464	0.00698382	0.998
GO_FATTY_ACID_DERIVATIVE_BIOSYNTHETIC_PROCESS	NA	409	575	NA	-0.182874	-1.67522	0.0246407	0.128548	1		0.13671	1.44831	0.0781893	0.124674	1
GO_FATTY_ACID_METABOLIC_PROCESS	NA	162	375	NA	-0.11846	-2.14888	0.00607287	0.0218662	0.97		0.118462	2.47248	0.00188324	0.000599605	0.334
GO_FATTY_ACYL_COA_BIOSYNTHETIC_PROCESS	NA	138	363	NA	-0.367208	-2.22748	0.00203252	0.0152134	0.884		0.401182	2.55645	0	0.000354418	0.206
GO_FATTY_ACYL_COA_METABOLIC_PROCESS	NA	398	311	NA	-0.246474	-1.6834	0.0214425	0.126398	1		0.389175	2.83708	0	5.71551e-05	0.029
GO_FC_EPSILON_RECEPTOR_SIGNALING_PATHWAY	NA	251	88	NA	-0.160213	-1.9214	0.0123711	0.0552059	1		0.385161	4.71889	0	0	0
GO_FC_RECEPTOR_MEDIATED_STIMULATORY_SIGNALING_PATHWAY	NA	514	195	NA	-0.150968	-1.53769	0.043299	0.192772	1		0.344969	3.60404	0	0	0
GO_FC_RECEPTOR_SIGNALING_PATHWAY	NA	180	55	NA	-0.140599	-2.07748	0.00213675	0.0306079	0.997		0.347422	5.37144	0	0	0
GO_GAMMA_AMINOBUTYRIC_ACID_SIGNALING_PATHWAY	NA	211	523	NA	-0.380645	-1.99977	0.00403226	0.0414984	1		0.295933	1.7642	0.0170455	0.0337003	1
GO_GENERATION_OF_PRECURSOR_METABOLITES_AND_ENERGY	NA	43	44	NA	-0.122477	-2.7789	0	0.000696087	0.028		0.220895	5.54938	0	0	0
GO_GLUCOSAMINE_CONTAINING_COMPOUND_METABOLIC_PROCESS	NA	531	529	NA	-0.30393	-1.5131	0.0582121	0.207086	1		0.3215	1.73493	0.0314961	0.0384705	1
GO_GLUTAMATE_RECEPTOR_SIGNALING_PATHWAY	NA	386	243	NA	-0.159152	-1.69886	0.0284553	0.120348	1		0.271113	3.16617	0	8.15263e-06	0.003
GO_GLUTAMATE_SECRETION	NA	539	367	NA	-0.217309	-1.5048	0.0554455	0.211328	1		0.320528	2.52082	0	0.000462899	0.263
GO_GLUTATHIONE_METABOLIC_PROCESS	NA	169	438	NA	-0.290185	-2.10155	0.0039604	0.0281622	0.993		0.268726	2.17227	0.00399202	0.00399902	0.963
GO_GLYCEROLIPID_BIOSYNTHETIC_PROCESS	NA	304	208	NA	-0.111583	-1.82665	0.0160321	0.0779418	1		0.195753	3.51369	0	0	0
GO_GLYCEROLIPID_METABOLIC_PROCESS	NA	110	244	NA	-0.118687	-2.34856	0.00207039	0.00817317	0.622		0.141306	3.15742	0	8.07905e-06	0.003
GO_GLYCEROPHOSPHOLIPID_METABOLIC_PROCESS	NA	59	144	NA	-0.143497	-2.66034	0	0.00159586	0.09		0.198223	4.03238	0	0	0
GO_GLYCOPROTEIN_BIOSYNTHETIC_PROCESS	NA	147	70	NA	-0.114262	-2.20192	0	0.0168052	0.924		0.249504	5.13994	0	0	0
GO_GLYCOPROTEIN_METABOLIC_PROCESS	NA	68	48	NA	-0.121551	-2.59024	0	0.00215836	0.143		0.242431	5.44874	0	0	0
GO_GLYCOSPHINGOLIPID_METABOLIC_PROCESS	NA	426	255	NA	-0.18207	-1.65777	0.0396825	0.135274	1		0.334186	3.08505	0	1.0093e-05	0.004
GO_GLYCOSYL_COMPOUND_METABOLIC_PROCESS	NA	181	231	NA	-0.190968	-2.0772	0.00956023	0.0305008	0.997		0.275116	3.25479	0	2.91878e-06	0.001
GO_GLYCOSYLATION	NA	79	68	NA	-0.149341	-2.51042	0	0.00324253	0.238		0.279364	5.18536	0	0	0
GO_GOLGI_ORGANIZATION	NA	320	75	NA	-0.144899	-1.8048	0.0127119	0.0834778	1		0.397799	5.01736	0	0	0
GO_GOLGI_TO_PLASMA_MEMBRANE_TRANSPORT	NA	217	181	NA	-0.234999	-1.9905	0.0177515	0.0426809	1		0.419083	3.69983	0	0	0
GO_GOLGI_VESICLE_BUDDING	NA	60	100	NA	-0.26251	-2.65796	0	0.00162383	0.093		0.43782	4.50594	0	0	0
GO_GOLGI_VESICLE_TRANSPORT	NA	2	6	NA	-0.189373	-3.8019	0	0	0		0.360191	7.72615	0	0	0
GO_GTP_METABOLIC_PROCESS	NA	492	402	NA	-0.291186	-1.55939	0.0505051	0.182989	1		0.419142	2.34428	0	0.00141099	0.644
GO_GUANOSINE_CONTAINING_COMPOUND_METABOLIC_PROCESS	NA	248	381	NA	-0.280837	-1.92828	0.0077821	0.0538925	1		0.355651	2.44557	0	0.000719382	0.399
GO_HEMATOPOIETIC_STEM_CELL_DIFFERENTIATION	NA	421	160	NA	-0.159026	-1.66634	0.0164609	0.131088	1		0.367205	3.91222	0	0	0
GO_HOMOTYPIC_CELL_CELL_ADHESION	NA	496	562	NA	-0.169808	-1.55669	0.0607966	0.183733	1		0.15063	1.54946	0.0510204	0.084505	1
GO_HYDROGEN_PEROXIDE_CATABOLIC_PROCESS	NA	85	533	NA	-0.531215	-2.48055	0	0.00391271	0.299		0.306588	1.71487	0.0292969	0.0422201	1
GO_HYDROGEN_PEROXIDE_METABOLIC_PROCESS	NA	155	488	NA	-0.343994	-2.18884	0	0.0176473	0.944		0.23722	1.91414	0.00573614	0.0165011	1
GO_IMMUNE_RESPONSE_REGULATING_CELL_SURFACE_RECEPTOR_SIGNALING_PATHWAY	NA	339	143	NA	-0.0925368	-1.77849	0.015534	0.0908567	1		0.190471	4.03418	0	0	0
GO_IMMUNE_RESPONSE_REGULATING_SIGNALING_PATHWAY	NA	570	156	NA	-0.0637333	-1.46401	0.0660194	0.237394	1		0.156259	3.94444	0	0	0
GO_IMPORT_ACROSS_PLASMA_MEMBRANE	NA	65	501	NA	-0.24776	-2.60634	0	0.0021989	0.134		0.143218	1.84399	0.0187891	0.0232318	1
GO_INNATE_IMMUNE_RESPONSE_ACTIVATING_CELL_SURFACE_RECEPTOR_SIGNALING_PATHWAY	NA	434	173	NA	-0.153676	-1.64518	0.0261569	0.140478	1		0.331291	3.7984	0	0	0
GO_INSULIN_RECEPTOR_SIGNALING_PATHWAY	NA	282	354	NA	-0.152945	-1.87659	0.00616016	0.0638838	1		0.196654	2.60012	0	0.000272783	0.155
GO_INTRA_GOLGI_VESICLE_MEDIATED_TRANSPORT	NA	215	286	NA	-0.308144	-1.99297	0.00411523	0.042401	1		0.462142	2.94299	0	2.86555e-05	0.013
GO_IRON_ION_HOMEOSTASIS	NA	260	309	NA	-0.209289	-1.90588	0.00601202	0.0584302	1		0.284669	2.84718	0	5.38462e-05	0.027
GO_IRON_ION_TRANSPORT	NA	366	376	NA	-0.207952	-1.72565	0.0204082	0.109988	1		0.254594	2.47148	0	0.000601407	0.336
GO_L_ALPHA_AMINO_ACID_TRANSMEMBRANE_TRANSPORT	NA	97	324	NA	-0.313328	-2.40349	0	0.00614046	0.473		0.329693	2.74631	0	0.000106459	0.055
GO_L_AMINO_ACID_TRANSPORT	NA	124	333	NA	-0.274014	-2.31285	0.002	0.00961409	0.72		0.287116	2.69871	0	0.000131543	0.069
GO_L_GLUTAMATE_TRANSMEMBRANE_TRANSPORT	NA	24	391	NA	-0.566244	-3.04066	0	4.59579e-05	0.001		0.408024	2.38433	0	0.00112457	0.562
GO_LAMELLIPODIUM_ORGANIZATION	NA	593	358	NA	-0.146616	-1.4425	0.0800821	0.248139	1		0.253438	2.58006	0	0.000309027	0.178
GO_LATE_ENDOSOME_TO_VACUOLE_TRANSPORT	NA	86	314	NA	-0.521401	-2.4702	0	0.00438868	0.332		0.575353	2.81842	0	6.60577e-05	0.033
GO_LEARNING	NA	166	89	NA	-0.171181	-2.12141	0.00596422	0.0254504	0.984		0.342059	4.6901	0	0	0
GO_LIPID_CATABOLIC_PROCESS	NA	115	497	NA	-0.140188	-2.34313	0	0.00817908	0.641		0.0903702	1.86302	0.0019802	0.0212504	1
GO_LIPID_MODIFICATION	NA	62	213	NA	-0.16216	-2.63849	0	0.00181004	0.106		0.200589	3.45853	0	0	0
GO_LIPID_OXIDATION	NA	146	404	NA	-0.208675	-2.2113	0	0.0158739	0.908		0.197796	2.33078	0	0.00153811	0.681
GO_LIPOPROTEIN_BIOSYNTHETIC_PROCESS	NA	351	259	NA	-0.160432	-1.75585	0.0250522	0.0985267	1		0.275028	3.0762	0	1.00079e-05	0.004
GO_LIPOPROTEIN_METABOLIC_PROCESS	NA	212	268	NA	-0.174434	-1.99875	0.00196464	0.0416159	1		0.231741	3.03018	0	1.43407e-05	0.006
GO_LIPOSACCHARIDE_METABOLIC_PROCESS	NA	487	272	NA	-0.135867	-1.56823	0.0588235	0.178317	1		0.247793	3.00575	0	1.64512e-05	0.007
GO_LOCALIZATION_WITHIN_MEMBRANE	NA	271	211	NA	-0.175972	-1.89199	0.0162933	0.0608402	1		0.312627	3.48286	0	0	0
GO_LOCOMOTORY_BEHAVIOR	NA	240	232	NA	-0.139665	-1.94414	0.00419287	0.0509297	1		0.208089	3.24541	0	2.91309e-06	0.001
GO_LONG_CHAIN_FATTY_ACYL_COA_BIOSYNTHETIC_PROCESS	NA	231	526	NA	-0.40094	-1.95821	0.008	0.0485699	1		0.337275	1.74883	0.0204499	0.0362402	1
GO_LONG_CHAIN_FATTY_ACYL_COA_METABOLIC_PROCESS	NA	600	522	NA	-0.256655	-1.43865	0.0994036	0.249494	1		0.305741	1.76439	0.0206612	0.0336862	1
GO_LONG_TERM_MEMORY	NA	168	507	NA	-0.339664	-2.11276	0.00423729	0.0265373	0.988		0.274177	1.83481	0.0132325	0.0242194	1
GO_LONG_TERM_SYNAPTIC_POTENTIATION	NA	322	271	NA	-0.178949	-1.80282	0.0137795	0.0838284	1		0.283862	3.01329	0	1.41581e-05	0.006
GO_LOW_DENSITY_LIPOPROTEIN_RECEPTOR_PARTICLE_METABOLIC_PROCESS	NA	542	586	NA	-0.289848	-1.50007	0.0709812	0.21427	1		0.233103	1.36619	0.125498	0.167047	1
GO_LYSOSOMAL_TRANSPORT	NA	84	92	NA	-0.223511	-2.49135	0.0019305	0.00364911	0.281		0.402654	4.67835	0	0	0
GO_LYTIC_VACUOLE_ORGANIZATION	NA	346	277	NA	-0.197478	-1.7622	0.0181452	0.096898	1		0.331009	2.98961	0	1.8512e-05	0.008
GO_MACROAUTOPHAGY	NA	1	3	NA	-0.212894	-3.91885	0	0	0		0.439366	8.42292	0	0	0
GO_MANNOSYLATION	NA	557	341	NA	-0.22907	-1.48045	0.079918	0.226483	1		0.39143	2.65777	0	0.000164043	0.089
GO_MATING	NA	358	536	NA	-0.310137	-1.742	0.0282258	0.103359	1		0.234885	1.70877	0.0278884	0.0433165	1
GO_MATING_BEHAVIOR	NA	382	535	NA	-0.352766	-1.70322	0.0203666	0.118796	1		0.294156	1.70934	0.0280561	0.043203	1
GO_MEMBRANE_BIOGENESIS	NA	422	398	NA	-0.254863	-1.66496	0.0276134	0.13165	1		0.322278	2.35979	0.00195695	0.00127762	0.608
GO_MEMBRANE_FUSION	NA	63	180	NA	-0.216579	-2.63414	0	0.00184895	0.11		0.273765	3.70307	0	0	0
GO_MEMBRANE_LIPID_BIOSYNTHETIC_PROCESS	NA	308	267	NA	-0.14027	-1.81628	0.00574713	0.0810432	1		0.226556	3.03152	0	1.44105e-05	0.006
GO_MEMBRANE_LIPID_CATABOLIC_PROCESS	NA	354	460	NA	-0.287517	-1.74963	0.0225873	0.100383	1		0.306242	2.04024	0.00560748	0.00874246	0.999
GO_MEMBRANE_LIPID_METABOLIC_PROCESS	NA	36	171	NA	-0.189319	-2.83731	0	0.000542258	0.018		0.230168	3.81061	0	0	0
GO_MEMBRANE_PROTEIN_ECTODOMAIN_PROTEOLYSIS	NA	555	397	NA	-0.218061	-1.48274	0.0745098	0.224924	1		0.310138	2.36092	0	0.00127209	0.605
GO_MEMBRANE_RAFT_ORGANIZATION	NA	391	567	NA	-0.31329	-1.6929	0.0348361	0.122751	1		0.264967	1.51256	0.0740741	0.0980777	1
GO_MEMORY	NA	74	248	NA	-0.221841	-2.54182	0	0.00268452	0.19		0.245712	3.13923	0	7.96404e-06	0.003
GO_MICROTUBULE_BASED_TRANSPORT	NA	350	53	NA	-0.118857	-1.75741	0.01417	0.0982563	1		0.351174	5.40015	0	0	0
GO_MIDBODY_ABSCISSION	NA	494	322	NA	-0.322355	-1.55747	0.0458015	0.183721	1		0.56206	2.76556	0	0.000101466	0.052
GO_MIDBRAIN_DEVELOPMENT	NA	292	473	NA	-0.200967	-1.85505	0.00398406	0.0696314	1		0.186978	1.99446	0.0120482	0.0109863	1
GO_MITOCHONDRIAL_ELECTRON_TRANSPORT_NADH_TO_UBIQUINONE	NA	12	125	NA	-0.406327	-3.2559	0	0	0		0.51588	4.13207	0	0	0
GO_MITOCHONDRIAL_FISSION	NA	521	393	NA	-0.218568	-1.53039	0.0626305	0.195511	1		0.336949	2.37829	0.00395257	0.0011724	0.577
GO_MITOCHONDRIAL_FUSION	NA	326	320	NA	-0.331389	-1.79286	0.0219124	0.0871783	1		0.497591	2.77706	0	9.64686e-05	0.049
GO_MITOCHONDRIAL_GENE_EXPRESSION	NA	75	26	NA	-0.175211	-2.53082	0	0.00286469	0.204		0.415361	5.99868	0	0	0
GO_MITOCHONDRIAL_MEMBRANE_ORGANIZATION	NA	469	190	NA	-0.141608	-1.58636	0.0569106	0.171839	1		0.307779	3.62243	0	0	0
GO_MITOCHONDRIAL_RESPIRATORY_CHAIN_COMPLEX_ASSEMBLY	NA	14	122	NA	-0.30519	-3.23277	0	0	0		0.387672	4.15939	0	0	0
GO_MITOCHONDRIAL_RESPIRATORY_CHAIN_COMPLEX_IV_ASSEMBLY	NA	525	482	NA	-0.315963	-1.52141	0.0712871	0.202043	1		0.373746	1.93502	0.00986193	0.0148202	1
GO_MITOCHONDRIAL_TRANSLATION	NA	91	43	NA	-0.179748	-2.4327	0	0.00526197	0.403		0.422505	5.57817	0	0	0
GO_MITOCHONDRIAL_TRANSLATIONAL_TERMINATION	NA	45	46	NA	-0.253852	-2.76887	0	0.000715054	0.03		0.496419	5.50177	0	0	0
GO_MITOCHONDRION_LOCALIZATION	NA	357	283	NA	-0.228015	-1.74553	0.0117417	0.101729	1		0.370049	2.96092	0	2.48107e-05	0.011
GO_MITOCHONDRION_MORPHOGENESIS	NA	257	435	NA	-0.353979	-1.91132	0.00785855	0.0572967	1		0.387195	2.17546	0.0020284	0.00393617	0.96
GO_MITOCHONDRION_ORGANIZATION	NA	73	5	NA	-0.107484	-2.55347	0	0.00265802	0.182		0.326506	7.98304	0	0	0
GO_MONOCARBOXYLIC_ACID_BIOSYNTHETIC_PROCESS	NA	411	538	NA	-0.120891	-1.67397	0.0390947	0.128853	1		0.101335	1.7039	0.0319361	0.0442327	1
GO_MONOCARBOXYLIC_ACID_CATABOLIC_PROCESS	NA	272	534	NA	-0.1626	-1.89168	0.00627615	0.0607583	1		0.135208	1.71044	0.016	0.0430661	1
GO_MONOSACCHARIDE_BIOSYNTHETIC_PROCESS	NA	466	596	NA	-0.165283	-1.58956	0.0546559	0.17049	1		0.118577	1.29402	0.172199	0.212437	1
GO_MONOVALENT_INORGANIC_CATION_HOMEOSTASIS	NA	6	542	NA	-0.307319	-3.46293	0	0	0		0.118876	1.68468	0.0278884	0.0481192	1
GO_MONOVALENT_INORGANIC_CATION_TRANSPORT	NA	4	284	NA	-0.171679	-3.61282	0	0	0		0.119162	2.95828	0	2.47729e-05	0.011
GO_MULTIVESICULAR_BODY_ORGANIZATION	NA	253	239	NA	-0.307753	-1.91922	0.00391389	0.0554541	1		0.483141	3.18104	0	5.52428e-06	0.002
GO_MULTIVESICULAR_BODY_SORTING_PATHWAY	NA	196	251	NA	-0.301315	-2.04015	0.00400802	0.0352209	1		0.462056	3.13276	0	7.89381e-06	0.003
GO_MUSCLE_CELL_MIGRATION	NA	576	257	NA	-0.144234	-1.45751	0.0732673	0.241279	1		0.283112	3.08346	0	1.00587e-05	0.004
GO_MYELOID_LEUKOCYTE_CYTOKINE_PRODUCTION	NA	558	518	NA	-0.241138	-1.47824	0.0802348	0.22835	1		0.28553	1.79104	0.0177165	0.0298381	1
GO_MYELOID_LEUKOCYTE_MEDIATED_IMMUNITY	NA	21	67	NA	-0.137426	-3.10025	0	5.22249e-05	0.001		0.210897	5.21521	0	0	0
GO_NADH_DEHYDROGENASE_COMPLEX_ASSEMBLY	NA	37	136	NA	-0.327214	-2.82989	0	0.000527988	0.018		0.468795	4.06112	0	0	0
GO_NEGATIVE_REGULATION_OF_ACTIN_FILAMENT_DEPOLYMERIZATION	NA	190	531	NA	-0.322737	-2.06002	0.00193424	0.0322379	0.999		0.2387	1.72144	0.0314342	0.0409997	1
GO_NEGATIVE_REGULATION_OF_ACTIN_FILAMENT_POLYMERIZATION	NA	137	360	NA	-0.286813	-2.23068	0	0.0149233	0.879		0.31252	2.57891	0	0.000308656	0.179
GO_NEGATIVE_REGULATION_OF_ANION_TRANSPORT	NA	390	528	NA	-0.345446	-1.69359	0.0326296	0.122595	1		0.295763	1.73615	0.022	0.0382618	1
GO_NEGATIVE_REGULATION_OF_CALCIUM_MEDIATED_SIGNALING	NA	388	504	NA	-0.310496	-1.697	0.031068	0.121003	1		0.285204	1.83768	0.016632	0.0238957	1
GO_NEGATIVE_REGULATION_OF_CAMP_MEDIATED_SIGNALING	NA	303	510	NA	-0.379564	-1.82692	0.0115607	0.0780387	1		0.324417	1.829	0.0137255	0.0248705	1
GO_NEGATIVE_REGULATION_OF_CELL_MATRIX_ADHESION	NA	191	426	NA	-0.297868	-2.05849	0.0078125	0.0323795	0.999		0.304337	2.22177	0.00203666	0.00299418	0.912
GO_NEGATIVE_REGULATION_OF_CELL_SUBSTRATE_ADHESION	NA	352	401	NA	-0.206363	-1.75486	0.0255403	0.0988061	1		0.258868	2.3532	0	0.00133909	0.624
GO_NEGATIVE_REGULATION_OF_CELLULAR_PROTEIN_LOCALIZATION	NA	451	253	NA	-0.141116	-1.61682	0.0451128	0.154846	1		0.262781	3.08687	0	1.01621e-05	0.004
GO_NEGATIVE_REGULATION_OF_CELLULAR_RESPONSE_TO_GROWTH_FACTOR_STIMULUS	NA	338	583	NA	-0.148643	-1.77874	0.00956023	0.0909971	1		0.100423	1.39309	0.097561	0.152371	1
GO_NEGATIVE_REGULATION_OF_CYSTEINE_TYPE_ENDOPEPTIDASE_ACTIVITY	NA	332	479	NA	-0.189895	-1.78729	0.0139721	0.0883341	1		0.186106	1.95608	0.0101626	0.0133693	1
GO_NEGATIVE_REGULATION_OF_ERBB_SIGNALING_PATHWAY	NA	410	453	NA	-0.220305	-1.67501	0.0390947	0.128423	1		0.245746	2.06678	0.00192678	0.00757332	0.999
GO_NEGATIVE_REGULATION_OF_G_PROTEIN_COUPLED_RECEPTOR_SIGNALING_PATHWAY	NA	504	503	NA	-0.226808	-1.55028	0.0556701	0.185654	1		0.221875	1.83911	0.012	0.0237236	1
GO_NEGATIVE_REGULATION_OF_HYDROLASE_ACTIVITY	NA	244	409	NA	-0.100652	-1.93211	0.00974659	0.053672	1		0.100403	2.30294	0	0.00185047	0.747
GO_NEGATIVE_REGULATION_OF_INTRACELLULAR_SIGNAL_TRANSDUCTION	NA	548	80	NA	-0.0650839	-1.49361	0.0717213	0.217459	1		0.19783	4.99216	0	0	0
GO_NEGATIVE_REGULATION_OF_ION_TRANSPORT	NA	459	432	NA	-0.137924	-1.59967	0.05	0.164752	1		0.1601	2.19176	0	0.00362465	0.946
GO_NEGATIVE_REGULATION_OF_JNK_CASCADE	NA	545	494	NA	-0.234154	-1.49737	0.0675676	0.215532	1		0.273413	1.88286	0.00970874	0.0192354	1
GO_NEGATIVE_REGULATION_OF_MACROAUTOPHAGY	NA	522	215	NA	-0.233628	-1.52293	0.0575397	0.201601	1		0.526243	3.44239	0	0	0
GO_NEGATIVE_REGULATION_OF_MUSCLE_CONTRACTION	NA	579	572	NA	-0.288888	-1.45588	0.09375	0.241279	1		0.253265	1.47825	0.0714286	0.111847	1
GO_NEGATIVE_REGULATION_OF_NERVOUS_SYSTEM_PROCESS	NA	379	588	NA	-0.352785	-1.70777	0.0199601	0.116765	1		0.234	1.36075	0.11332	0.170323	1
GO_NEGATIVE_REGULATION_OF_NEUROTRANSMITTER_TRANSPORT	NA	135	403	NA	-0.431845	-2.24518	0	0.0137304	0.854		0.426958	2.33953	0	0.00145257	0.656
GO_NEGATIVE_REGULATION_OF_ORGANELLE_ASSEMBLY	NA	341	492	NA	-0.264988	-1.7758	0.0208729	0.0914082	1		0.263401	1.88768	0.014	0.0188243	1
GO_NEGATIVE_REGULATION_OF_OXIDATIVE_STRESS_INDUCED_NEURON_DEATH	NA	538	486	NA	-0.318145	-1.50642	0.0755467	0.210585	1		0.38278	1.923	0.00610998	0.0157818	1
GO_NEGATIVE_REGULATION_OF_PEPTIDYL_SERINE_PHOSPHORYLATION	NA	363	425	NA	-0.302465	-1.73217	0.0216535	0.107145	1		0.35556	2.22279	0	0.00297723	0.91
GO_NEGATIVE_REGULATION_OF_PROTEASOMAL_PROTEIN_CATABOLIC_PROCESS	NA	430	318	NA	-0.204955	-1.65266	0.034	0.136728	1		0.332074	2.78415	0	8.36431e-05	0.042
GO_NEGATIVE_REGULATION_OF_PROTEIN_CONTAINING_COMPLEX_ASSEMBLY	NA	194	199	NA	-0.175391	-2.05108	0.00404858	0.0332846	1		0.280563	3.57685	0	0	0
GO_NEGATIVE_REGULATION_OF_PROTEIN_CONTAINING_COMPLEX_DISASSEMBLY	NA	544	339	NA	-0.168582	-1.49764	0.0722433	0.215626	1		0.276295	2.66857	0	0.000157786	0.085
GO_NEGATIVE_REGULATION_OF_PROTEIN_POLYMERIZATION	NA	117	305	NA	-0.257227	-2.34007	0.00214133	0.00825551	0.648		0.299555	2.86474	0	4.26039e-05	0.021
GO_NEGATIVE_REGULATION_OF_PROTEOLYSIS	NA	64	599	NA	-0.161431	-2.62877	0	0.001904	0.115		0.0625	1.26325	0.178431	0.235216	1
GO_NEGATIVE_REGULATION_OF_RECEPTOR_MEDIATED_ENDOCYTOSIS	NA	298	387	NA	-0.343655	-1.84001	0.0130435	0.0742012	1		0.413735	2.41992	0	0.000852649	0.454
GO_NEGATIVE_REGULATION_OF_RESPONSE_TO_DRUG	NA	204	489	NA	-0.339206	-2.02017	0.00208333	0.0383584	1		0.292594	1.91013	0.00203666	0.0168666	1
GO_NEGATIVE_REGULATION_OF_RESPONSE_TO_ENDOPLASMIC_RETICULUM_STRESS	NA	283	279	NA	-0.254263	-1.87559	0.01	0.0640849	1		0.39031	2.98763	0	1.83687e-05	0.008
GO_NEGATIVE_REGULATION_OF_RESPONSE_TO_OXIDATIVE_STRESS	NA	501	323	NA	-0.214279	-1.55206	0.0616016	0.185011	1		0.337085	2.7652	0	0.000101337	0.052
GO_NEGATIVE_REGULATION_OF_SUPRAMOLECULAR_FIBER_ORGANIZATION	NA	461	238	NA	-0.130646	-1.5973	0.0371094	0.165911	1		0.237562	3.18428	0	5.53449e-06	0.002
GO_NEGATIVE_REGULATION_OF_SYNAPTIC_TRANSMISSION	NA	154	240	NA	-0.242987	-2.18961	0.00787402	0.0176521	0.944		0.321055	3.17792	0	5.50397e-06	0.002
GO_NEGATIVE_REGULATION_OF_TRANSPORT	NA	238	164	NA	-0.0946476	-1.94551	0.00824742	0.0508834	1		0.158167	3.89036	0	0	0
GO_NEURAL_NUCLEUS_DEVELOPMENT	NA	206	332	NA	-0.253798	-2.01609	0.00197628	0.0388338	1		0.319891	2.70141	0	0.00012816	0.067
GO_NEURON_DEATH	NA	438	83	NA	-0.0840889	-1.63383	0.0392157	0.146861	1		0.23473	4.81882	0	0	0
GO_NEURON_DEATH_IN_RESPONSE_TO_OXIDATIVE_STRESS	NA	255	412	NA	-0.331922	-1.91431	0.0063425	0.0566972	1		0.373791	2.27771	0.00189753	0.00216619	0.815
GO_NEURON_PROJECTION_ORGANIZATION	NA	396	134	NA	-0.156657	-1.68843	0.0272374	0.123894	1		0.383062	4.07497	0	0	0
GO_NEUROTRANSMITTER_CATABOLIC_PROCESS	NA	356	566	NA	-0.367285	-1.74706	0.0240481	0.101189	1		0.286029	1.51563	0.0721248	0.0969424	1
GO_NEUROTRANSMITTER_METABOLIC_PROCESS	NA	564	547	NA	-0.126441	-1.47098	0.0732177	0.232863	1		0.118691	1.63842	0.0584677	0.0588186	1
GO_NEUROTRANSMITTER_SECRETION	NA	205	182	NA	-0.151988	-2.01867	0.00588235	0.0384893	1		0.24776	3.68834	0	0	0
GO_NEUROTRANSMITTER_TRANSPORT	NA	35	138	NA	-0.17005	-2.84131	0	0.00055732	0.018		0.215393	4.05401	0	0	0
GO_NEUROTRANSMITTER_UPTAKE	NA	127	449	NA	-0.320665	-2.30062	0	0.0102487	0.749		0.26845	2.11257	0	0.00581421	0.993
GO_NUCLEAR_ENVELOPE_ORGANIZATION	NA	495	225	NA	-0.18869	-1.55717	0.0534653	0.183663	1		0.3944	3.28365	0	2.98287e-06	0.001
GO_NUCLEAR_ENVELOPE_REASSEMBLY	NA	126	342	NA	-0.452205	-2.30142	0	0.0102424	0.747		0.518551	2.6509	0	0.000178797	0.098
GO_NUCLEOBASE_CONTAINING_SMALL_MOLECULE_BIOSYNTHETIC_PROCESS	NA	533	263	NA	-0.141517	-1.51273	0.0597302	0.206757	1		0.265917	3.06343	0	9.85824e-06	0.004
GO_NUCLEOBASE_CONTAINING_SMALL_MOLECULE_CATABOLIC_PROCESS	NA	418	484	NA	-0.263921	-1.66681	0.0338645	0.13161	1		0.266235	1.92918	0.0132325	0.0153286	1
GO_NUCLEOBASE_METABOLIC_PROCESS	NA	342	578	NA	-0.273405	-1.77114	0.0157791	0.0934759	1		0.203389	1.42896	0.0914634	0.134184	1
GO_NUCLEOSIDE_BISPHOSPHATE_BIOSYNTHETIC_PROCESS	NA	276	242	NA	-0.207068	-1.88587	0.0115163	0.0620377	1		0.338756	3.17125	0	5.47379e-06	0.002
GO_NUCLEOSIDE_BISPHOSPHATE_METABOLIC_PROCESS	NA	113	325	NA	-0.195575	-2.34509	0.00196464	0.00817474	0.635		0.209501	2.73918	0	0.000107849	0.056
GO_NUCLEOSIDE_METABOLIC_PROCESS	NA	247	312	NA	-0.198791	-1.92836	0.00956023	0.0540513	1		0.260702	2.82742	0	6.07372e-05	0.031
GO_NUCLEOSIDE_PHOSPHATE_BIOSYNTHETIC_PROCESS	NA	263	112	NA	-0.114992	-1.90539	0.00817996	0.0580013	1		0.240473	4.35496	0	0	0
GO_NUCLEOSIDE_TRIPHOSPHATE_METABOLIC_PROCESS	NA	307	214	NA	-0.183281	-1.8176	0.0179641	0.0807065	1		0.327979	3.44289	0	0	0
GO_NUCLEOTIDE_EXCISION_REPAIR_DNA_DAMAGE_RECOGNITION	NA	293	382	NA	-0.335515	-1.8549	0.0116959	0.0695062	1		0.422744	2.44261	0	0.000731063	0.405
GO_NUCLEOTIDE_EXCISION_REPAIR_DNA_DUPLEX_UNWINDING	NA	589	467	NA	-0.267489	-1.44444	0.105566	0.248234	1		0.368457	2.01558	0.00207469	0.0098882	0.999
GO_OLIGOSACCHARIDE_METABOLIC_PROCESS	NA	573	457	NA	-0.198898	-1.45786	0.0804829	0.241957	1		0.26084	2.05224	0.00414938	0.00819749	0.999
GO_ORGANELLE_DISASSEMBLY	NA	554	117	NA	-0.137859	-1.4852	0.0639535	0.223257	1		0.397475	4.30694	0	0	0
GO_ORGANELLE_FUSION	NA	96	114	NA	-0.199809	-2.4152	0	0.00570414	0.447		0.347332	4.32987	0	0	0
GO_ORGANELLE_MEMBRANE_FUSION	NA	195	191	NA	-0.192702	-2.04352	0.00572519	0.034551	1		0.329809	3.62081	0	0	0
GO_ORGANELLE_TRANSPORT_ALONG_MICROTUBULE	NA	58	71	NA	-0.258284	-2.6618	0	0.00158592	0.088		0.480011	5.07982	0	0	0
GO_ORGANIC_ACID_BIOSYNTHETIC_PROCESS	NA	506	481	NA	-0.0908776	-1.54932	0.0516529	0.185818	1		0.0965648	1.9454	0.00792079	0.0140838	1
GO_ORGANIC_ACID_CATABOLIC_PROCESS	NA	61	544	NA	-0.161912	-2.65516	0	0.00159923	0.093		0.0894931	1.66247	0.0238569	0.0532636	1
GO_ORGANIC_ACID_TRANSMEMBRANE_TRANSPORT	NA	270	427	NA	-0.157957	-1.89379	0.0120724	0.0604713	1		0.168224	2.22117	0.00210526	0.00301359	0.912
GO_ORGANIC_ACID_TRANSPORT	NA	130	524	NA	-0.136032	-2.27597	0	0.0117467	0.802		0.0868701	1.75709	0.021611	0.0348659	1
GO_ORGANIC_ANION_TRANSPORT	NA	345	496	NA	-0.0887328	-1.76245	0.028626	0.0970279	1		0.0768607	1.86356	0.00982318	0.0212082	1
GO_ORGANIC_HYDROXY_COMPOUND_METABOLIC_PROCESS	NA	184	472	NA	-0.0957141	-2.06997	0.00203252	0.0313752	0.998		0.081664	1.99763	0.0118343	0.010808	0.999
GO_OVULATION_CYCLE	NA	503	591	NA	-0.192292	-1.55052	0.0512821	0.185737	1		0.139183	1.34565	0.12753	0.179631	1
GO_OXIDATIVE_PHOSPHORYLATION	NA	34	85	NA	-0.249229	-2.84284	0	0.000573244	0.018		0.395644	4.7816	0	0	0
GO_PEPTIDYL_ASPARAGINE_MODIFICATION	NA	509	292	NA	-0.231333	-1.54554	0.074	0.187766	1		0.418026	2.91866	0	3.4014e-05	0.016
GO_PEPTIDYL_SERINE_DEPHOSPHORYLATION	NA	405	380	NA	-0.30936	-1.67616	0.0390144	0.129061	1		0.456225	2.46282	0	0.000640069	0.354
GO_PEPTIDYL_THREONINE_DEPHOSPHORYLATION	NA	193	574	NA	-0.421397	-2.0548	0.00619835	0.0327077	0.999		0.30476	1.45256	0.0828283	0.122691	1
GO_PERK_MEDIATED_UNFOLDED_PROTEIN_RESPONSE	NA	581	448	NA	-0.282518	-1.455	0.0833333	0.241524	1		0.391541	2.12715	0	0.00532988	0.99
GO_PEROXISOMAL_TRANSPORT	NA	408	520	NA	-0.19179	-1.6757	0.0350877	0.128506	1		0.182661	1.77976	0.0197239	0.0314845	1
GO_PEROXISOME_ORGANIZATION	NA	203	471	NA	-0.207147	-2.02316	0	0.0378156	1		0.197109	1.99836	0.0040568	0.0107894	0.999
GO_PH_REDUCTION	NA	148	447	NA	-0.323322	-2.20088	0.00205339	0.0168378	0.926		0.267624	2.1342	0.00383142	0.00510429	0.989
GO_PHAGOCYTOSIS	NA	359	184	NA	-0.105869	-1.74083	0.0158103	0.10373	1		0.198414	3.65878	0	0	0
GO_PHAGOSOME_ACIDIFICATION	NA	94	550	NA	-0.512617	-2.42496	0	0.00555212	0.428		0.269642	1.62163	0.0403226	0.0629803	1
GO_PHAGOSOME_MATURATION	NA	403	500	NA	-0.246446	-1.67921	0.0313808	0.127758	1		0.244383	1.85269	0.0143149	0.0223173	1
GO_PHOSPHATIDYLCHOLINE_BIOSYNTHETIC_PROCESS	NA	371	502	NA	-0.266362	-1.72212	0.0233463	0.110739	1		0.250779	1.84055	0.0208333	0.0235612	1
GO_PHOSPHATIDYLINOSITOL_BIOSYNTHETIC_PROCESS	NA	374	168	NA	-0.140376	-1.71657	0.0192308	0.113092	1		0.314164	3.82649	0	0	0
GO_PHOSPHATIDYLINOSITOL_DEPHOSPHORYLATION	NA	471	456	NA	-0.289579	-1.58319	0.0515464	0.172532	1		0.360394	2.05235	0.00860215	0.00819806	0.999
GO_PHOSPHATIDYLINOSITOL_METABOLIC_PROCESS	NA	289	201	NA	-0.131105	-1.86229	0.015534	0.0676289	1		0.240398	3.57078	0	0	0
GO_PHOSPHATIDYLINOSITOL_PHOSPHORYLATION	NA	394	343	NA	-0.216298	-1.69043	0.018797	0.123461	1		0.32298	2.6504	0	0.000180266	0.099
GO_PHOSPHOLIPID_BIOSYNTHETIC_PROCESS	NA	129	129	NA	-0.133691	-2.29005	0.00376648	0.0108425	0.77		0.225672	4.09703	0	0	0
GO_PHOSPHOLIPID_CATABOLIC_PROCESS	NA	534	555	NA	-0.220986	-1.51127	0.0693878	0.207724	1		0.206488	1.57917	0.0502901	0.0749041	1
GO_PHOSPHOLIPID_DEPHOSPHORYLATION	NA	484	361	NA	-0.231131	-1.57063	0.0384615	0.177554	1		0.373839	2.56905	0.00198413	0.000324254	0.187
GO_PHOSPHOLIPID_METABOLIC_PROCESS	NA	50	98	NA	-0.131668	-2.71496	0	0.00122874	0.057		0.196526	4.55159	0	0	0
GO_PIGMENT_BIOSYNTHETIC_PROCESS	NA	328	564	NA	-0.231736	-1.79099	0.0134615	0.0875954	1		0.182164	1.53319	0.0691824	0.0905141	1
GO_PIGMENT_GRANULE_LOCALIZATION	NA	160	513	NA	-0.387059	-2.16032	0.00390625	0.0207012	0.965		0.298024	1.81627	0.0134875	0.0264053	1
GO_PIGMENT_METABOLIC_PROCESS	NA	207	552	NA	-0.240052	-2.01469	0.00801603	0.0390499	1		0.173464	1.61117	0.0404858	0.0657649	1
GO_PLATELET_ACTIVATION	NA	198	508	NA	-0.160031	-2.03904	0.00601202	0.035173	1		0.128119	1.83357	0.0119522	0.0243773	1
GO_PLATELET_AGGREGATION	NA	551	478	NA	-0.182571	-1.49296	0.0665323	0.217047	1		0.214809	1.96165	0.01002	0.0130048	1
GO_PLATELET_DEGRANULATION	NA	152	548	NA	-0.194507	-2.19224	0	0.0174961	0.939		0.125594	1.63689	0.0371901	0.0591968	1
GO_POSITIVE_REGULATION_OF_AMINE_TRANSPORT	NA	453	580	NA	-0.303163	-1.61557	0.0452675	0.155154	1		0.20735	1.41	0.0987124	0.143599	1
GO_POSITIVE_REGULATION_OF_CALCIUM_ION_TRANSPORT	NA	370	469	NA	-0.169088	-1.72309	0.0242291	0.110438	1		0.162504	2.0056	0.010352	0.0103995	0.999
GO_POSITIVE_REGULATION_OF_CANONICAL_WNT_SIGNALING_PATHWAY	NA	580	167	NA	-0.112896	-1.45564	0.0788382	0.24118	1		0.276782	3.82835	0	0	0
GO_POSITIVE_REGULATION_OF_CELL_JUNCTION_ASSEMBLY	NA	568	443	NA	-0.231658	-1.46766	0.0711539	0.234706	1		0.292297	2.14223	0.00383877	0.00485287	0.982
GO_POSITIVE_REGULATION_OF_CELL_SUBSTRATE_JUNCTION_ORGANIZATION	NA	470	374	NA	-0.272103	-1.58609	0.0524194	0.171121	1		0.409825	2.47659	0	0.00058054	0.324
GO_POSITIVE_REGULATION_OF_CELLULAR_PROTEIN_CATABOLIC_PROCESS	NA	460	56	NA	-0.121593	-1.5983	0.039501	0.165447	1		0.39007	5.3626	0	0	0
GO_POSITIVE_REGULATION_OF_DNA_TEMPLATED_TRANSCRIPTION_INITIATION	NA	265	420	NA	-0.347837	-1.90029	0.010352	0.0593025	1		0.361002	2.24999	0.0041841	0.0025549	0.875
GO_POSITIVE_REGULATION_OF_ESTABLISHMENT_OF_PROTEIN_LOCALIZATION	NA	595	175	NA	-0.0678166	-1.44067	0.0925197	0.249534	1		0.16243	3.78316	0	0	0
GO_POSITIVE_REGULATION_OF_EXOCYTOSIS	NA	444	370	NA	-0.1712	-1.62612	0.0526316	0.15061	1		0.238647	2.51257	0	0.000482201	0.275
GO_POSITIVE_REGULATION_OF_EXTRINSIC_APOPTOTIC_SIGNALING_PATHWAY	NA	468	316	NA	-0.197139	-1.58836	0.0389864	0.17085	1		0.340178	2.80331	0	7.51071e-05	0.038
GO_POSITIVE_REGULATION_OF_HORMONE_SECRETION	NA	547	521	NA	-0.146311	-1.49382	0.059761	0.217644	1		0.135333	1.77848	0.0120724	0.0316865	1
GO_POSITIVE_REGULATION_OF_INTRACELLULAR_PROTEIN_TRANSPORT	NA	505	183	NA	-0.110314	-1.54945	0.047817	0.186022	1		0.252932	3.66545	0	0	0
GO_POSITIVE_REGULATION_OF_INTRACELLULAR_TRANSPORT	NA	474	141	NA	-0.103556	-1.57988	0.0430528	0.174136	1		0.244651	4.04973	0	0	0
GO_POSITIVE_REGULATION_OF_ION_TRANSMEMBRANE_TRANSPORT	NA	437	405	NA	-0.135865	-1.63734	0.0428571	0.144942	1		0.166502	2.32549	0	0.0015968	0.694
GO_POSITIVE_REGULATION_OF_ION_TRANSPORT	NA	161	313	NA	-0.135389	-2.15094	0.00191205	0.021667	0.97		0.148906	2.82357	0	6.05763e-05	0.031
GO_POSITIVE_REGULATION_OF_LIPID_KINASE_ACTIVITY	NA	393	551	NA	-0.257665	-1.69051	0.0243408	0.12368	1		0.229122	1.61795	0.0430528	0.0639645	1
GO_POSITIVE_REGULATION_OF_LIPID_METABOLIC_PROCESS	NA	457	549	NA	-0.140039	-1.6049	0.0334646	0.161799	1		0.119803	1.63064	0.042885	0.0607892	1
GO_POSITIVE_REGULATION_OF_MYELOID_LEUKOCYTE_CYTOKINE_PRODUCTION_INVOLVED_IN_IMMUNE_RESPONSE	NA	529	450	NA	-0.308346	-1.51582	0.0582329	0.205254	1		0.422302	2.09615	0	0.00643426	0.996
GO_POSITIVE_REGULATION_OF_NEURON_DIFFERENTIATION	NA	439	45	NA	-0.0804999	-1.63332	0.0456432	0.146927	1		0.254006	5.54492	0	0	0
GO_POSITIVE_REGULATION_OF_PHOSPHOLIPID_METABOLIC_PROCESS	NA	262	559	NA	-0.263889	-1.90575	0.00585938	0.058092	1		0.187452	1.55505	0.0489362	0.0825927	1
GO_POSITIVE_REGULATION_OF_PROTEIN_AUTOPHOSPHORYLATION	NA	412	465	NA	-0.310671	-1.67316	0.0355731	0.129037	1		0.348148	2.01916	0.00584795	0.0097126	0.999
GO_POSITIVE_REGULATION_OF_PROTEIN_CATABOLIC_PROCESS	NA	318	65	NA	-0.11388	-1.80635	0.0204499	0.0832322	1		0.313532	5.25743	0	0	0
GO_POSITIVE_REGULATION_OF_PROTEIN_KINASE_B_SIGNALING	NA	536	581	NA	-0.12744	-1.50669	0.0747475	0.211013	1		0.0933404	1.40912	0.0792079	0.144041	1
GO_POSITIVE_REGULATION_OF_PROTEIN_LOCALIZATION_TO_CELL_PERIPHERY	NA	556	463	NA	-0.176674	-1.48245	0.0728347	0.224862	1		0.215893	2.02152	0.00386847	0.00959568	0.999
GO_POSITIVE_REGULATION_OF_PROTEIN_LOCALIZATION_TO_MEMBRANE	NA	132	264	NA	-0.191932	-2.25663	0	0.0130268	0.839		0.252016	3.05528	0	9.80936e-06	0.004
GO_POSITIVE_REGULATION_OF_PROTEIN_TARGETING_TO_MEMBRANE	NA	450	545	NA	-0.254584	-1.6189	0.0404624	0.15399	1		0.253276	1.65457	0.0445344	0.0550723	1
GO_POSITIVE_REGULATION_OF_PROTEIN_TYROSINE_KINASE_ACTIVITY	NA	561	424	NA	-0.18752	-1.47617	0.0671937	0.229061	1		0.269051	2.22357	0	0.00296876	0.909
GO_POSITIVE_REGULATION_OF_SECRETION	NA	337	419	NA	-0.0943917	-1.78152	0.0111732	0.0899133	1		0.0996354	2.25173	0.00389105	0.00252964	0.87
GO_POSITIVE_REGULATION_OF_SODIUM_ION_TRANSPORT	NA	258	455	NA	-0.281905	-1.91097	0.0095057	0.0572225	1		0.29743	2.05552	0.0019305	0.00807642	0.999
GO_POSITIVE_REGULATION_OF_SYNAPSE_ASSEMBLY	NA	355	304	NA	-0.193983	-1.74769	0.0233051	0.101113	1		0.298992	2.86908	0	4.27214e-05	0.021
GO_POSITIVE_REGULATION_OF_TRANSCRIPTION_INITIATION_FROM_RNA_POLYMERASE_II_PROMOTER	NA	274	436	NA	-0.399227	-1.88879	0.0117647	0.0614678	1		0.415952	2.17403	0.00205761	0.00396314	0.962
GO_POSITIVE_REGULATION_OF_TRANSMEMBRANE_TRANSPORT	NA	483	337	NA	-0.113328	-1.5713	0.0568928	0.177346	1		0.171413	2.67609	0	0.00014611	0.078
GO_POSITIVE_REGULATION_OF_TRANSPORTER_ACTIVITY	NA	584	390	NA	-0.139175	-1.45163	0.0894632	0.243181	1		0.196396	2.39698	0	0.00101595	0.521
GO_POST_GOLGI_VESICLE_MEDIATED_TRANSPORT	NA	136	82	NA	-0.198704	-2.24119	0.00199601	0.0139265	0.858		0.422904	4.84637	0	0	0
GO_POST_TRANSLATIONAL_PROTEIN_MODIFICATION	NA	5	57	NA	-0.178947	-3.51561	0	0	0		0.248783	5.34015	0	0	0
GO_POSTSYNAPSE_ORGANIZATION	NA	324	76	NA	-0.125913	-1.79544	0.0185567	0.086453	1		0.340762	5.00313	0	0	0
GO_POTASSIUM_ION_TRANSPORT	NA	106	437	NA	-0.166323	-2.36672	0.0019305	0.0074133	0.579		0.125857	2.17312	0	0.00398575	0.963
GO_PRESYNAPSE_ORGANIZATION	NA	297	274	NA	-0.248686	-1.84294	0.00406504	0.0732318	1		0.376446	2.99978	0	1.86869e-05	0.008
GO_PROCESS_UTILIZING_AUTOPHAGIC_MECHANISM	NA	18	1	NA	-0.13514	-3.1912	0	0	0		0.366482	9.29984	0	0	0
GO_PROTEASOMAL_PROTEIN_CATABOLIC_PROCESS	NA	29	2	NA	-0.122036	-2.90385	0	0.000372788	0.01		0.343934	8.61117	0	0	0
GO_PROTEASOMAL_UBIQUITIN_INDEPENDENT_PROTEIN_CATABOLIC_PROCESS	NA	540	335	NA	-0.281284	-1.50322	0.0779727	0.211846	1		0.478409	2.68732	0	0.000138022	0.074
GO_PROTEIN_CONTAINING_COMPLEX_DISASSEMBLY	NA	31	11	NA	-0.15145	-2.86576	0	0.000524272	0.015		0.347893	6.94142	0	0	0
GO_PROTEIN_DEPHOSPHORYLATION	NA	578	50	NA	-0.0756636	-1.45627	0.0838323	0.241222	1		0.275287	5.43991	0	0	0
GO_PROTEIN_DEPOLYMERIZATION	NA	455	237	NA	-0.147036	-1.60594	0.0639659	0.161694	1		0.273013	3.21257	0	2.83033e-06	0.001
GO_PROTEIN_EXIT_FROM_ENDOPLASMIC_RETICULUM	NA	582	338	NA	-0.203949	-1.45383	0.0816327	0.242401	1		0.351821	2.67575	0	0.000147645	0.079
GO_PROTEIN_FOLDING	NA	39	31	NA	-0.179322	-2.81821	0	0.000516895	0.019		0.359025	5.84643	0	0	0
GO_PROTEIN_KINASE_B_SIGNALING	NA	516	430	NA	-0.103317	-1.53535	0.0471092	0.193445	1		0.122494	2.21338	0.00215983	0.00315637	0.918
GO_PROTEIN_LOCALIZATION_TO_CELL_PERIPHERY	NA	53	59	NA	-0.140848	-2.70681	0	0.00124359	0.061		0.259452	5.3159	0	0	0
GO_PROTEIN_LOCALIZATION_TO_LYSOSOME	NA	432	223	NA	-0.251231	-1.65055	0.0315582	0.137588	1		0.472621	3.30725	0	3.03743e-06	0.001
GO_PROTEIN_LOCALIZATION_TO_PLASMA_MEMBRANE	NA	123	93	NA	-0.134422	-2.31472	0	0.00955935	0.715		0.255979	4.63547	0	0	0
GO_PROTEIN_LOCALIZATION_TO_POSTSYNAPTIC_MEMBRANE	NA	489	350	NA	-0.209414	-1.56505	0.060241	0.17994	1		0.343743	2.62671	0	0.000211436	0.118
GO_PROTEIN_LOCALIZATION_TO_SYNAPSE	NA	142	178	NA	-0.214423	-2.2194	0.00211864	0.0155392	0.898		0.3533	3.71017	0	0	0
GO_PROTEIN_LOCALIZATION_TO_VACUOLE	NA	347	146	NA	-0.205967	-1.76099	0.0116279	0.0972574	1		0.445334	4.01537	0	0	0
GO_PROTEIN_MANNOSYLATION	NA	216	415	NA	-0.379123	-1.99183	0.003663	0.0424594	1		0.397575	2.25929	0.00204082	0.00244367	0.862
GO_PROTEIN_N_LINKED_GLYCOSYLATION	NA	572	108	NA	-0.144447	-1.45846	0.0933063	0.241676	1		0.421779	4.41449	0	0	0
GO_PROTEIN_O_LINKED_MANNOSYLATION	NA	537	422	NA	-0.316435	-1.50668	0.0709939	0.210688	1		0.448326	2.24697	0.0019305	0.00259186	0.877
GO_PROTEIN_POLYMERIZATION	NA	232	79	NA	-0.114418	-1.95436	0.0078125	0.0495189	1		0.273541	4.99348	0	0	0
GO_PROTEIN_POLYUBIQUITINATION	NA	395	15	NA	-0.0881537	-1.68896	0.0325048	0.123813	1		0.340809	6.61456	0	0	0
GO_PROTEIN_PROCESSING	NA	553	464	NA	-0.10885	-1.49056	0.0567515	0.21841	1		0.127954	2.01984	0.00978474	0.00968678	0.999
GO_PROTEIN_TARGETING	NA	71	12	NA	-0.116961	-2.5802	0	0.00223157	0.153		0.290849	6.89977	0	0	0
GO_PROTEIN_TARGETING_TO_LYSOSOME	NA	294	278	NA	-0.372356	-1.85394	0.0157791	0.0695813	1		0.587971	2.98877	0	1.84258e-05	0.008
GO_PROTEIN_TARGETING_TO_MEMBRANE	NA	222	106	NA	-0.133541	-1.97532	0.00403226	0.0454918	1		0.283262	4.46381	0	0	0
GO_PROTEIN_TARGETING_TO_VACUOLE	NA	361	154	NA	-0.244804	-1.7401	0.0176817	0.103633	1		0.544638	3.94945	0	0	0
GO_PROTEIN_TRANSMEMBRANE_TRANSPORT	NA	279	260	NA	-0.218481	-1.87967	0.0104384	0.0635977	1		0.353376	3.07404	0	9.97422e-06	0.004
GO_PROTON_TRANSMEMBRANE_TRANSPORT	NA	118	330	NA	-0.220531	-2.33474	0	0.00847444	0.66		0.206613	2.71062	0	0.00012029	0.063
GO_PURINE_CONTAINING_COMPOUND_BIOSYNTHETIC_PROCESS	NA	301	105	NA	-0.129387	-1.83466	0.0133843	0.0753443	1		0.294502	4.46521	0	0	0
GO_PURINE_CONTAINING_COMPOUND_CATABOLIC_PROCESS	NA	296	444	NA	-0.247832	-1.84388	0.0119048	0.0730568	1		0.268728	2.13947	0.00406504	0.00493178	0.985
GO_PURINE_CONTAINING_COMPOUND_METABOLIC_PROCESS	NA	47	104	NA	-0.134253	-2.74061	0	0.000984465	0.043		0.197638	4.48017	0	0	0
GO_PURINE_NUCLEOSIDE_METABOLIC_PROCESS	NA	250	416	NA	-0.242913	-1.92184	0.0121212	0.055449	1		0.267354	2.25649	0	0.00247025	0.865
GO_PURINE_NUCLEOSIDE_TRIPHOSPHATE_METABOLIC_PROCESS	NA	413	254	NA	-0.19486	-1.67076	0.032	0.130438	1		0.337363	3.08582	0	1.01102e-05	0.004
GO_PYRIMIDINE_CONTAINING_COMPOUND_BIOSYNTHETIC_PROCESS	NA	559	417	NA	-0.193549	-1.47711	0.0734694	0.228887	1		0.271857	2.25412	0.00192678	0.00249355	0.866
GO_PYRIMIDINE_NUCLEOTIDE_BIOSYNTHETIC_PROCESS	NA	571	355	NA	-0.201917	-1.45929	0.0921844	0.241163	1		0.342359	2.59163	0	0.000294173	0.169
GO_PYRIMIDINE_RIBONUCLEOTIDE_METABOLIC_PROCESS	NA	427	346	NA	-0.319308	-1.65731	0.0384615	0.135274	1		0.502889	2.63955	0	0.000188704	0.104
GO_RAB_PROTEIN_SIGNAL_TRANSDUCTION	NA	213	298	NA	-0.223852	-1.99597	0.00612245	0.04216	1		0.308797	2.89549	0	3.76858e-05	0.018
GO_RAC_PROTEIN_SIGNAL_TRANSDUCTION	NA	513	352	NA	-0.225111	-1.53867	0.0683594	0.192287	1		0.383769	2.61088	0	0.000245817	0.138
GO_RAS_PROTEIN_SIGNAL_TRANSDUCTION	NA	535	39	NA	-0.0690866	-1.50869	0.074364	0.209515	1		0.240597	5.68198	0	0	0
GO_REACTIVE_OXYGEN_SPECIES_METABOLIC_PROCESS	NA	219	276	NA	-0.124244	-1.97977	0.00847458	0.0449297	1		0.170698	2.9927	0	1.85409e-05	0.008
GO_RECEPTOR_CATABOLIC_PROCESS	NA	523	307	NA	-0.222486	-1.52272	0.0594059	0.201483	1		0.394419	2.85806	0	4.82755e-05	0.024
GO_RECEPTOR_LOCALIZATION_TO_SYNAPSE	NA	164	230	NA	-0.246934	-2.14266	0.0021322	0.0224249	0.971		0.375492	3.25998	0	2.93023e-06	0.001
GO_RECEPTOR_MEDIATED_ENDOCYTOSIS	NA	285	161	NA	-0.113235	-1.86679	0.00776699	0.0669609	1		0.215702	3.90938	0	0	0
GO_RECEPTOR_METABOLIC_PROCESS	NA	319	212	NA	-0.124742	-1.80494	0.0170455	0.0836454	1		0.216662	3.45971	0	0	0
GO_REGULATION_OF_ACTIN_FILAMENT_BASED_PROCESS	NA	442	94	NA	-0.0822273	-1.63056	0.0365854	0.147977	1		0.20882	4.59657	0	0	0
GO_REGULATION_OF_ACTIN_FILAMENT_ORGANIZATION	NA	330	116	NA	-0.107544	-1.79016	0.00608519	0.0875186	1		0.246838	4.31817	0	0	0
GO_REGULATION_OF_AMINO_ACID_TRANSPORT	NA	234	433	NA	-0.356769	-1.95322	0.00385356	0.0495426	1		0.329348	2.17959	0.00195695	0.00385436	0.96
GO_REGULATION_OF_ANATOMICAL_STRUCTURE_SIZE	NA	93	49	NA	-0.113294	-2.43127	0.00217391	0.00522663	0.404		0.218251	5.44436	0	0	0
GO_REGULATION_OF_ANION_TRANSMEMBRANE_TRANSPORT	NA	278	440	NA	-0.340414	-1.88396	0.00196464	0.0623032	1		0.363347	2.15134	0.0056926	0.00458673	0.973
GO_REGULATION_OF_ANION_TRANSPORT	NA	443	439	NA	-0.18016	-1.6293	0.0356436	0.148529	1		0.200884	2.17027	0.00204918	0.00404881	0.964
GO_REGULATION_OF_AUTOPHAGOSOME_ASSEMBLY	NA	237	219	NA	-0.27836	-1.94735	0.00191939	0.0505953	1		0.5034	3.42158	0	0	0
GO_REGULATION_OF_AUTOPHAGY	NA	176	10	NA	-0.108033	-2.08816	0.00421941	0.0292661	0.995		0.351665	6.95077	0	0	0
GO_REGULATION_OF_BODY_FLUID_LEVELS	NA	241	541	NA	-0.0945766	-1.94251	0.00804829	0.0512127	1		0.068315	1.68683	0.0318725	0.0477148	1
GO_REGULATION_OF_CAMP_DEPENDENT_PROTEIN_KINASE_ACTIVITY	NA	585	511	NA	-0.308503	-1.45131	0.0786749	0.243168	1		0.341699	1.8228	0.015873	0.0255897	1
GO_REGULATION_OF_CAMP_MEDIATED_SIGNALING	NA	368	530	NA	-0.284612	-1.72388	0.0175439	0.110485	1		0.224777	1.73227	0.0221774	0.0389403	1
GO_REGULATION_OF_CARDIAC_MUSCLE_CONTRACTION_BY_CALCIUM_ION_SIGNALING	NA	577	514	NA	-0.274288	-1.45681	0.0836735	0.241363	1		0.311301	1.81432	0.024	0.0266544	1
GO_REGULATION_OF_CATION_CHANNEL_ACTIVITY	NA	414	245	NA	-0.122794	-1.67061	0.0323232	0.130248	1		0.207496	3.1529	0	8.04999e-06	0.003
GO_REGULATION_OF_CATION_TRANSMEMBRANE_TRANSPORT	NA	480	194	NA	-0.0877109	-1.57406	0.0559846	0.176074	1		0.175834	3.60405	0	0	0
GO_REGULATION_OF_CELL_MORPHOGENESIS	NA	567	7	NA	-0.0622929	-1.468	0.0769231	0.234724	1		0.296767	7.31663	0	0	0
GO_REGULATION_OF_CELLULAR_AMINE_METABOLIC_PROCESS	NA	100	177	NA	-0.254477	-2.39413	0.00408998	0.00637972	0.499		0.359577	3.72845	0	0	0
GO_REGULATION_OF_CELLULAR_AMINO_ACID_METABOLIC_PROCESS	NA	157	153	NA	-0.249177	-2.17379	0	0.0191713	0.955		0.428752	3.96159	0	0	0
GO_REGULATION_OF_CELLULAR_COMPONENT_SIZE	NA	112	37	NA	-0.114933	-2.34837	0	0.00806459	0.623		0.27067	5.72848	0	0	0
GO_REGULATION_OF_CELLULAR_KETONE_METABOLIC_PROCESS	NA	476	197	NA	-0.120113	-1.57851	0.0567951	0.174332	1		0.237172	3.58135	0	0	0
GO_REGULATION_OF_CELLULAR_PROTEIN_CATABOLIC_PROCESS	NA	362	27	NA	-0.10257	-1.73661	0.0289575	0.105253	1		0.334407	5.99612	0	0	0
GO_REGULATION_OF_COFACTOR_METABOLIC_PROCESS	NA	170	495	NA	-0.337568	-2.10031	0.00196464	0.0281955	0.993		0.276936	1.88193	0.00566038	0.0193054	1
GO_REGULATION_OF_CYTOPLASMIC_TRANSPORT	NA	415	365	NA	-0.292457	-1.67061	0.0282258	0.129974	1		0.45765	2.53333	0	0.000427991	0.243
GO_REGULATION_OF_DENDRITIC_SPINE_MORPHOGENESIS	NA	486	203	NA	-0.202628	-1.56968	0.0665281	0.177748	1		0.438078	3.55532	0	0	0
GO_REGULATION_OF_DNA_TEMPLATED_TRANSCRIPTION_INITIATION	NA	235	476	NA	-0.300377	-1.95321	0.00796813	0.0493631	1		0.284434	1.9729	0.00199601	0.0122822	1
GO_REGULATION_OF_ENDOPLASMIC_RETICULUM_UNFOLDED_PROTEIN_RESPONSE	NA	541	485	NA	-0.249741	-1.50302	0.0682731	0.211712	1		0.325837	1.92915	0.0040404	0.0153195	1
GO_REGULATION_OF_EPIDERMAL_GROWTH_FACTOR_ACTIVATED_RECEPTOR_ACTIVITY	NA	508	569	NA	-0.287133	-1.54558	0.0385356	0.188047	1		0.245934	1.50735	0.0550098	0.0999808	1
GO_REGULATION_OF_ER_TO_GOLGI_VESICLE_MEDIATED_TRANSPORT	NA	202	493	NA	-0.438008	-2.02578	0	0.0373898	1		0.385764	1.8869	0.00813008	0.0188601	1
GO_REGULATION_OF_ERBB_SIGNALING_PATHWAY	NA	365	389	NA	-0.176542	-1.72871	0.0277778	0.108532	1		0.22123	2.40027	0.00193798	0.00099376	0.513
GO_REGULATION_OF_EXOCYTOSIS	NA	133	130	NA	-0.148631	-2.25594	0.00198413	0.0130361	0.84		0.249549	4.09388	0	0	0
GO_REGULATION_OF_INTRACELLULAR_TRANSPORT	NA	465	66	NA	-0.0806853	-1.58973	0.0454545	0.170705	1		0.24485	5.23159	0	0	0
GO_REGULATION_OF_INTRINSIC_APOPTOTIC_SIGNALING_PATHWAY	NA	433	315	NA	-0.125805	-1.64904	0.0207039	0.138355	1		0.199614	2.81756	0	6.97762e-05	0.035
GO_REGULATION_OF_ION_TRANSMEMBRANE_TRANSPORT	NA	49	198	NA	-0.128725	-2.72271	0	0.00114313	0.052		0.148919	3.57791	0	0	0
GO_REGULATION_OF_LONG_TERM_NEURONAL_SYNAPTIC_PLASTICITY	NA	227	351	NA	-0.343255	-1.96968	0.00790514	0.0461671	1		0.440919	2.61603	0	0.000238335	0.134
GO_REGULATION_OF_MACROAUTOPHAGY	NA	44	22	NA	-0.197629	-2.76989	0	0.000730598	0.03		0.423303	6.23367	0	0	0
GO_REGULATION_OF_MEMBRANE_POTENTIAL	NA	22	124	NA	-0.153582	-3.07546	0	4.99543e-05	0.001		0.177721	4.13215	0	0	0
GO_REGULATION_OF_METAL_ION_TRANSPORT	NA	321	269	NA	-0.0957575	-1.80314	0.00931099	0.0839359	1		0.136612	3.0296	0	1.43177e-05	0.006
GO_REGULATION_OF_MITOCHONDRIAL_FISSION	NA	389	461	NA	-0.304188	-1.69451	0.026616	0.122321	1		0.369331	2.0362	0.00790514	0.00892262	0.999
GO_REGULATION_OF_MITOCHONDRIAL_MEMBRANE_POTENTIAL	NA	228	174	NA	-0.223267	-1.96795	0.00197239	0.046447	1		0.409651	3.79802	0	0	0
GO_REGULATION_OF_MITOTIC_SPINDLE_ASSEMBLY	NA	565	296	NA	-0.272377	-1.4693	0.0717054	0.234134	1		0.5399	2.89916	0	3.5725e-05	0.017
GO_REGULATION_OF_NEURON_PROJECTION_DEVELOPMENT	NA	373	4	NA	-0.0738987	-1.722	0.0289575	0.110273	1		0.310146	8.02243	0	0	0
GO_REGULATION_OF_NEURONAL_SYNAPTIC_PLASTICITY	NA	186	302	NA	-0.251087	-2.06758	0.00403226	0.0315186	0.998		0.34316	2.87821	0	4.12876e-05	0.02
GO_REGULATION_OF_NEUROTRANSMITTER_LEVELS	NA	48	157	NA	-0.144168	-2.72721	0	0.0011443	0.051		0.191595	3.93488	0	0	0
GO_REGULATION_OF_NEUROTRANSMITTER_SECRETION	NA	286	262	NA	-0.171424	-1.86673	0.0102459	0.0667794	1		0.263139	3.06361	0	9.87465e-06	0.004
GO_REGULATION_OF_NEUROTRANSMITTER_TRANSPORT	NA	114	202	NA	-0.194343	-2.34369	0	0.00820713	0.641		0.264028	3.56295	0	0	0
GO_REGULATION_OF_NEUROTRANSMITTER_UPTAKE	NA	236	451	NA	-0.416537	-1.95305	0.00392927	0.0492336	1		0.405705	2.09419	0.0038835	0.00649709	0.996
GO_REGULATION_OF_OLIGODENDROCYTE_DIFFERENTIATION	NA	560	421	NA	-0.235475	-1.47623	0.0705394	0.229352	1		0.306933	2.24806	0.00204918	0.00257907	0.875
GO_REGULATION_OF_ORGANELLE_ASSEMBLY	NA	592	128	NA	-0.0961388	-1.44299	0.0901961	0.24833	1		0.261179	4.10755	0	0	0
GO_REGULATION_OF_ORGANIC_ACID_TRANSPORT	NA	458	429	NA	-0.228976	-1.6019	0.0487805	0.163932	1		0.256444	2.21859	0	0.00305117	0.916
GO_REGULATION_OF_OXIDATIVE_STRESS_INDUCED_CELL_DEATH	NA	552	303	NA	-0.1812	-1.49188	0.0852713	0.217807	1		0.305394	2.8781	0	4.12299e-05	0.02
GO_REGULATION_OF_PEPTIDASE_ACTIVITY	NA	158	556	NA	-0.115165	-2.16683	0	0.0199641	0.958		0.0695991	1.577	0.040568	0.0755074	1
GO_REGULATION_OF_PH	NA	67	527	NA	-0.2887	-2.60467	0	0.00215317	0.135		0.155081	1.74207	0.0239411	0.0372565	1
GO_REGULATION_OF_PHOSPHOLIPASE_ACTIVITY	NA	397	600	NA	-0.199526	-1.6839	0.0392157	0.126322	1		0.133677	1.26271	0.188841	0.235375	1
GO_REGULATION_OF_PHOSPHOLIPID_METABOLIC_PROCESS	NA	423	483	NA	-0.169289	-1.65979	0.0296443	0.134794	1		0.179051	1.93094	0.0100806	0.0151786	1
GO_REGULATION_OF_PHOSPHOPROTEIN_PHOSPHATASE_ACTIVITY	NA	309	120	NA	-0.162531	-1.81406	0.00835073	0.0817597	1		0.351345	4.21157	0	0	0
GO_REGULATION_OF_POSTSYNAPSE_ORGANIZATION	NA	143	95	NA	-0.201652	-2.2183	0	0.015581	0.9		0.390076	4.57182	0	0	0
GO_REGULATION_OF_POSTSYNAPTIC_MEMBRANE_NEUROTRANSMITTER_RECEPTOR_LEVELS	NA	401	204	NA	-0.175784	-1.68097	0.0204499	0.127161	1		0.351782	3.54573	0	0	0
GO_REGULATION_OF_POSTSYNAPTIC_MEMBRANE_POTENTIAL	NA	188	385	NA	-0.170169	-2.06605	0.00194175	0.0315229	0.999		0.174825	2.42041	0.0021097	0.000846591	0.45
GO_REGULATION_OF_PRESYNAPSE_ORGANIZATION	NA	424	384	NA	-0.259261	-1.65922	0.0307377	0.134895	1		0.357274	2.43335	0	0.000769146	0.425
GO_REGULATION_OF_PROTEASOMAL_PROTEIN_CATABOLIC_PROCESS	NA	185	36	NA	-0.135823	-2.06846	0.00400802	0.0315455	0.998		0.377976	5.74824	0	0	0
GO_REGULATION_OF_PROTEASOMAL_UBIQUITIN_DEPENDENT_PROTEIN_CATABOLIC_PROCESS	NA	252	78	NA	-0.150775	-1.9201	0.00621118	0.0553913	1		0.39466	4.99795	0	0	0
GO_REGULATION_OF_PROTEIN_AUTOPHOSPHORYLATION	NA	210	353	NA	-0.266933	-2.00043	0.00792079	0.0415351	1		0.323427	2.60317	0	0.000265695	0.15
GO_REGULATION_OF_PROTEIN_CATABOLIC_PROCESS	NA	197	14	NA	-0.098058	-2.03907	0.0121951	0.0353253	1		0.295365	6.61802	0	0	0
GO_REGULATION_OF_PROTEIN_CONTAINING_COMPLEX_ASSEMBLY	NA	223	28	NA	-0.0943267	-1.97443	0.00628931	0.0456308	1		0.260206	5.99261	0	0	0
GO_REGULATION_OF_PROTEIN_CONTAINING_COMPLEX_DISASSEMBLY	NA	380	216	NA	-0.1524	-1.70706	0.0169133	0.116967	1		0.281528	3.43533	0	0	0
GO_REGULATION_OF_PROTEIN_DEPHOSPHORYLATION	NA	420	87	NA	-0.130184	-1.66641	0.0225873	0.131326	1		0.348658	4.74508	0	0	0
GO_REGULATION_OF_PROTEIN_DEPOLYMERIZATION	NA	239	293	NA	-0.203316	-1.94529	0.00647948	0.0507787	1		0.285273	2.91733	0	3.39651e-05	0.016
GO_REGULATION_OF_PROTEIN_EXIT_FROM_ENDOPLASMIC_RETICULUM	NA	456	462	NA	-0.287887	-1.6059	0.036	0.161403	1		0.33969	2.02194	0	0.00957184	0.999
GO_REGULATION_OF_PROTEIN_LOCALIZATION_TO_CELL_PERIPHERY	NA	343	345	NA	-0.15211	-1.76961	0.0255403	0.0940208	1		0.214393	2.6406	0	0.000187433	0.103
GO_REGULATION_OF_PROTEIN_LOCALIZATION_TO_MEMBRANE	NA	128	147	NA	-0.159309	-2.29024	0	0.0108855	0.767		0.25811	4.013	0	0	0
GO_REGULATION_OF_PROTEIN_LOCALIZATION_TO_PLASMA_MEMBRANE	NA	482	340	NA	-0.151228	-1.57195	0.0446247	0.177172	1		0.240244	2.66556	0	0.000160301	0.087
GO_REGULATION_OF_PROTEIN_LOCALIZATION_TO_SYNAPSE	NA	323	347	NA	-0.300338	-1.79657	0.0173077	0.0862049	1		0.43585	2.63608	0	0.000193404	0.107
GO_REGULATION_OF_PROTEIN_MATURATION	NA	599	466	NA	-0.187953	-1.43877	0.0978044	0.249712	1		0.226951	2.01612	0.00395257	0.00985966	0.999
GO_REGULATION_OF_PROTEIN_OLIGOMERIZATION	NA	562	383	NA	-0.280067	-1.47545	0.0703934	0.229453	1		0.423484	2.44078	0	0.000737573	0.409
GO_REGULATION_OF_PROTEIN_POLYMERIZATION	NA	220	96	NA	-0.132846	-1.97618	0.00628931	0.0455356	1		0.282233	4.56654	0	0	0
GO_REGULATION_OF_PROTEIN_STABILITY	NA	601	61	NA	-0.0809647	-1.43859	0.0968992	0.249204	1		0.289586	5.30277	0	0	0
GO_REGULATION_OF_PROTEIN_TARGETING_TO_MEMBRANE	NA	400	515	NA	-0.24571	-1.68223	0.032	0.126632	1		0.258103	1.79451	0.0121457	0.0293802	1
GO_REGULATION_OF_PROTEIN_TYROSINE_KINASE_ACTIVITY	NA	385	280	NA	-0.174214	-1.69903	0.0290698	0.120518	1		0.276482	2.97859	0	2.05802e-05	0.009
GO_REGULATION_OF_REACTIVE_OXYGEN_SPECIES_METABOLIC_PROCESS	NA	300	273	NA	-0.133576	-1.83762	0.0141129	0.0744318	1		0.194783	3.00381	0	1.87164e-05	0.008
GO_REGULATION_OF_RECEPTOR_LOCALIZATION_TO_SYNAPSE	NA	381	396	NA	-0.342687	-1.70451	0.027027	0.118253	1		0.4719	2.36431	0	0.00125202	0.602
GO_REGULATION_OF_REGULATED_SECRETORY_PATHWAY	NA	591	301	NA	-0.113476	-1.4433	0.0797665	0.248378	1		0.208146	2.8786	0	4.13454e-05	0.02
GO_REGULATION_OF_RESPONSE_TO_DRUG	NA	224	406	NA	-0.21105	-1.97292	0.00578035	0.0458963	1		0.205316	2.31878	0	0.00166202	0.713
GO_REGULATION_OF_RESPONSE_TO_ENDOPLASMIC_RETICULUM_STRESS	NA	177	179	NA	-0.199316	-2.08765	0.00210084	0.029195	0.995		0.360672	3.70631	0	0	0
GO_REGULATION_OF_RESPONSE_TO_OXIDATIVE_STRESS	NA	493	349	NA	-0.167342	-1.55913	0.0507812	0.18289	1		0.252443	2.63103	0	0.000199309	0.111
GO_REGULATION_OF_RESPONSE_TO_WOUNDING	NA	156	487	NA	-0.171945	-2.184	0.0021097	0.0180077	0.947		0.128213	1.92233	0.00785855	0.0158302	1
GO_REGULATION_OF_SIGNALING_RECEPTOR_ACTIVITY	NA	515	371	NA	-0.124876	-1.53635	0.0534979	0.192987	1		0.175496	2.50734	0	0.000507149	0.287
GO_REGULATION_OF_SODIUM_ION_TRANSMEMBRANE_TRANSPORT	NA	306	475	NA	-0.212053	-1.82147	0.016129	0.0795078	1		0.216523	1.98594	0.011583	0.0114493	1
GO_REGULATION_OF_SODIUM_ION_TRANSMEMBRANE_TRANSPORTER_ACTIVITY	NA	369	509	NA	-0.226192	-1.72351	0.0225141	0.110465	1		0.214814	1.83275	0.00402414	0.0244177	1
GO_REGULATION_OF_SODIUM_ION_TRANSPORT	NA	314	506	NA	-0.184581	-1.81012	0.0117417	0.0824489	1		0.171354	1.8357	0.0142857	0.0241174	1
GO_REGULATION_OF_SUPRAMOLECULAR_FIBER_ORGANIZATION	NA	261	64	NA	-0.09639	-1.90578	0.00804829	0.0582824	1		0.255583	5.27287	0	0	0
GO_REGULATION_OF_SYNAPSE_STRUCTURE_OR_ACTIVITY	NA	119	60	NA	-0.137778	-2.32443	0	0.00913037	0.69		0.308547	5.31014	0	0	0
GO_REGULATION_OF_SYNAPTIC_PLASTICITY	NA	183	137	NA	-0.141368	-2.07569	0	0.0304776	0.997		0.25937	4.05636	0	0	0
GO_REGULATION_OF_SYNAPTIC_TRANSMISSION_GLUTAMATERGIC	NA	402	418	NA	-0.198577	-1.67996	0.019685	0.12758	1		0.243313	2.25245	0	0.00251927	0.869
GO_REGULATION_OF_SYNAPTIC_VESICLE_CYCLE	NA	69	101	NA	-0.221754	-2.5901	0	0.00213033	0.143		0.359039	4.48714	0	0	0
GO_REGULATION_OF_SYNAPTIC_VESICLE_ENDOCYTOSIS	NA	150	373	NA	-0.449958	-2.19962	0.0038835	0.0168374	0.928		0.494255	2.47695	0	0.000579665	0.323
GO_REGULATION_OF_SYNAPTIC_VESICLE_EXOCYTOSIS	NA	275	226	NA	-0.192997	-1.88652	0.0077821	0.0620078	1		0.318861	3.27571	0	2.96511e-06	0.001
GO_REGULATION_OF_SYNAPTIC_VESICLE_RECYCLING	NA	108	297	NA	-0.398316	-2.36304	0	0.0075362	0.588		0.473233	2.89722	0.00193424	3.56742e-05	0.017
GO_REGULATION_OF_TRANS_SYNAPTIC_SIGNALING	NA	11	18	NA	-0.154083	-3.28741	0	0	0		0.268613	6.3658	0	0	0
GO_REGULATION_OF_TRANSCRIPTION_FROM_RNA_POLYMERASE_II_PROMOTER_IN_RESPONSE_TO_HYPOXIA	NA	532	165	NA	-0.156409	-1.51305	0.0633397	0.206807	1		0.387938	3.877	0	0	0
GO_REGULATION_OF_TRANSCRIPTION_INITIATION_FROM_RNA_POLYMERASE_II_PROMOTER	NA	348	512	NA	-0.315373	-1.75863	0.0258449	0.0981483	1		0.301039	1.82044	0.0137795	0.0258662	1
GO_REGULATION_OF_TRANSLATION_IN_RESPONSE_TO_STRESS	NA	399	410	NA	-0.33853	-1.68252	0.015748	0.126732	1		0.453607	2.30191	0	0.00186457	0.751
GO_REGULATION_OF_TRANSLATIONAL_INITIATION	NA	187	91	NA	-0.21528	-2.06673	0	0.0315228	0.999		0.471948	4.68297	0	0	0
GO_REGULATION_OF_TRANSPORTER_ACTIVITY	NA	249	236	NA	-0.113541	-1.9259	0.00576923	0.0543637	1		0.173876	3.22224	0	2.85194e-06	0.001
GO_REGULATION_OF_TUBE_SIZE	NA	517	565	NA	-0.143323	-1.53429	0.0511247	0.194056	1		0.113389	1.53061	0.0684647	0.091463	1
GO_REGULATION_OF_VACUOLE_ORGANIZATION	NA	159	220	NA	-0.296058	-2.16568	0.00395257	0.0201045	0.96		0.466175	3.39053	0	0	0
GO_REGULATION_OF_VASCULAR_PERMEABILITY	NA	588	577	NA	-0.240226	-1.44696	0.108871	0.246337	1		0.203641	1.43583	0.106796	0.130794	1
GO_RELAXATION_OF_MUSCLE	NA	431	593	NA	-0.302144	-1.65092	0.036961	0.137606	1		0.211395	1.32905	0.146825	0.189779	1
GO_RENAL_FILTRATION	NA	416	587	NA	-0.340836	-1.66911	0.0300429	0.130696	1		0.243416	1.36515	0.119048	0.167625	1
GO_RENAL_SYSTEM_PROCESS	NA	290	568	NA	-0.188384	-1.86173	0.0194553	0.0676253	1		0.121821	1.51083	0.0652174	0.0986022	1
GO_RENAL_WATER_HOMEOSTASIS	NA	491	594	NA	-0.269033	-1.56427	0.0486381	0.179945	1		0.20113	1.32639	0.140845	0.191387	1
GO_REPRODUCTIVE_BEHAVIOR	NA	479	532	NA	-0.28559	-1.5775	0.0545455	0.17389	1		0.259253	1.71579	0.0322581	0.0421193	1
GO_RESPIRATORY_ELECTRON_TRANSPORT_CHAIN	NA	7	63	NA	-0.302238	-3.43532	0	0	0		0.453576	5.27397	0	0	0
GO_RESPONSE_TO_ACID_CHEMICAL	NA	151	344	NA	-0.120877	-2.19664	0	0.0170669	0.931		0.127964	2.64971	0	0.000180057	0.099
GO_RESPONSE_TO_ACTIVITY	NA	549	570	NA	-0.179429	-1.49334	0.0657371	0.217359	1		0.160068	1.5018	0.0692464	0.102103	1
GO_RESPONSE_TO_AMINO_ACID	NA	103	189	NA	-0.206498	-2.38905	0	0.00651002	0.521		0.304346	3.6281	0	0	0
GO_RESPONSE_TO_AMMONIUM_ION	NA	507	135	NA	-0.12104	-1.54796	0.0598456	0.186371	1		0.276502	4.06164	0	0	0
GO_RESPONSE_TO_ANESTHETIC	NA	518	368	NA	-0.183028	-1.53303	0.0609037	0.19481	1		0.260168	2.51833	0	0.000471785	0.269
GO_RESPONSE_TO_CADMIUM_ION	NA	463	408	NA	-0.202339	-1.59291	0.0481928	0.168803	1		0.281271	2.30404	0.00198807	0.00184171	0.745
GO_RESPONSE_TO_CARBOHYDRATE	NA	590	261	NA	-0.0951226	-1.44438	0.083004	0.247958	1		0.180575	3.06446	0	9.90762e-06	0.004
GO_RESPONSE_TO_CATECHOLAMINE	NA	404	227	NA	-0.175974	-1.67696	0.0337302	0.128843	1		0.301461	3.27491	0	2.95924e-06	0.001
GO_RESPONSE_TO_COCAINE	NA	472	490	NA	-0.233064	-1.5831	0.0435685	0.172311	1		0.236203	1.89975	0.00595238	0.0177851	1
GO_RESPONSE_TO_COPPER_ION	NA	524	557	NA	-0.276839	-1.52246	0.046748	0.201351	1		0.245938	1.57573	0.0508806	0.0758701	1
GO_RESPONSE_TO_DOPAMINE	NA	502	288	NA	-0.185591	-1.55148	0.0508475	0.185172	1		0.29523	2.93224	0	3.03649e-05	0.014
GO_RESPONSE_TO_DSRNA	NA	280	411	NA	-0.273104	-1.87917	0.0124224	0.0635853	1		0.300942	2.29632	0	0.00193849	0.767
GO_RESPONSE_TO_ELECTRICAL_STIMULUS	NA	440	539	NA	-0.249849	-1.63198	0.0340681	0.14761	1		0.224136	1.69911	0.0246407	0.0451868	1
GO_RESPONSE_TO_ENDOPLASMIC_RETICULUM_STRESS	NA	107	21	NA	-0.132089	-2.36657	0.00193424	0.00736284	0.579		0.331456	6.30003	0	0	0
GO_RESPONSE_TO_ESTRADIOL	NA	377	590	NA	-0.149064	-1.70976	0.0248447	0.116207	1		0.10217	1.34938	0.125	0.177122	1
GO_RESPONSE_TO_ETHANOL	NA	178	378	NA	-0.200868	-2.08728	0	0.0291089	0.995		0.18937	2.46779	0	0.000619682	0.343
GO_RESPONSE_TO_EXTRACELLULAR_STIMULUS	NA	485	158	NA	-0.0734478	-1.57	0.0554415	0.177772	1		0.155038	3.93041	0	0	0
GO_RESPONSE_TO_INCREASED_OXYGEN_LEVELS	NA	218	589	NA	-0.365595	-1.98474	0.00792079	0.0437912	1		0.220612	1.35839	0.11976	0.171614	1
GO_RESPONSE_TO_INSULIN	NA	419	224	NA	-0.100135	-1.66666	0.0385396	0.13145	1		0.177542	3.28505	0	2.99482e-06	0.001
GO_RESPONSE_TO_INTERLEUKIN_12	NA	500	249	NA	-0.210678	-1.5535	0.0460251	0.184182	1		0.382602	3.13765	0	7.9358e-06	0.003
GO_RESPONSE_TO_LEAD_ION	NA	527	407	NA	-0.269994	-1.51929	0.0686869	0.202999	1		0.392653	2.3102	0	0.00177986	0.738
GO_RESPONSE_TO_LEPTIN	NA	594	561	NA	-0.280653	-1.44109	0.0968421	0.249407	1		0.273659	1.55006	0.0454545	0.0843059	1
GO_RESPONSE_TO_METAL_ION	NA	302	275	NA	-0.0971972	-1.82764	0.0101833	0.0778975	1		0.139068	2.9936	0	1.857e-05	0.008
GO_RESPONSE_TO_NERVE_GROWTH_FACTOR	NA	267	188	NA	-0.238027	-1.89706	0.0137795	0.0599023	1		0.423765	3.63772	0	0	0
GO_RESPONSE_TO_OXIDATIVE_STRESS	NA	259	102	NA	-0.0896935	-1.90746	0.012	0.0581669	1		0.193186	4.4867	0	0	0
GO_RESPONSE_TO_PEPTIDE	NA	597	193	NA	-0.0653679	-1.43978	0.105906	0.249353	1		0.142135	3.61361	0	0	0
GO_RESPONSE_TO_PEPTIDE_HORMONE	NA	378	217	NA	-0.0835288	-1.70907	0.0228216	0.116242	1		0.146454	3.43165	0	0	0
GO_RESPONSE_TO_STARVATION	NA	273	139	NA	-0.132912	-1.89098	0.008	0.0608635	1		0.264214	4.05398	0	0	0
GO_RESPONSE_TO_THYROID_HORMONE	NA	327	576	NA	-0.331537	-1.79257	0.012474	0.0871148	1		0.236397	1.44105	0.0916179	0.128233	1
GO_RESPONSE_TO_TOPOLOGICALLY_INCORRECT_PROTEIN	NA	256	41	NA	-0.124	-1.91397	0.00203666	0.0565909	1		0.352432	5.66259	0	0	0
GO_RESPONSE_TO_TOXIC_SUBSTANCE	NA	360	250	NA	-0.0808988	-1.74036	0.0119284	0.103763	1		0.125506	3.13606	0	7.92176e-06	0.003
GO_RESPONSE_TO_TRANSFORMING_GROWTH_FACTOR_BETA	NA	364	348	NA	-0.107197	-1.73212	0.0140281	0.106924	1		0.150587	2.63133	0	0.000199537	0.111
GO_RESPONSE_TO_XENOBIOTIC_STIMULUS	NA	245	414	NA	-0.126661	-1.92993	0	0.0539429	1		0.1254	2.26924	0.002	0.00228487	0.838
GO_RETROGRADE_AXONAL_TRANSPORT	NA	429	291	NA	-0.329187	-1.65505	0.0417495	0.135613	1		0.582179	2.91884	0	3.4063e-05	0.016
GO_RETROGRADE_TRANSPORT_ENDOSOME_TO_GOLGI	NA	376	115	NA	-0.17393	-1.7139	0.0243408	0.114104	1		0.451424	4.32888	0	0	0
GO_RETROGRADE_VESICLE_MEDIATED_TRANSPORT_GOLGI_TO_ENDOPLASMIC_RETICULUM	NA	583	84	NA	-0.141762	-1.45175	0.072407	0.24378	1		0.454289	4.8136	0	0	0
GO_RIBONUCLEOSIDE_METABOLIC_PROCESS	NA	173	386	NA	-0.246975	-2.09344	0.00612245	0.0289379	0.994		0.271884	2.42034	0.00201613	0.000845783	0.45
GO_RIBONUCLEOSIDE_TRIPHOSPHATE_METABOLIC_PROCESS	NA	428	210	NA	-0.191124	-1.65539	0.0301205	0.135654	1		0.392427	3.49765	0	0	0
GO_RIBONUCLEOTIDE_CATABOLIC_PROCESS	NA	264	334	NA	-0.308219	-1.90393	0.0104384	0.0582566	1		0.422123	2.69438	0	0.00013364	0.071
GO_RIBOSE_PHOSPHATE_BIOSYNTHETIC_PROCESS	NA	335	77	NA	-0.132129	-1.78214	0.0201207	0.0900669	1		0.349315	4.99939	0	0	0
GO_RIBOSE_PHOSPHATE_METABOLIC_PROCESS	NA	51	58	NA	-0.132319	-2.71288	0	0.00122691	0.058		0.239232	5.31699	0	0	0
GO_RIBOSOME_BIOGENESIS	NA	512	8	NA	-0.0822702	-1.54138	0.0704762	0.190433	1		0.387673	7.29517	0	0	0
GO_RNA_5_END_PROCESSING	NA	406	454	NA	-0.330301	-1.67597	0.0302419	0.128904	1		0.399792	2.06261	0.0019084	0.00778428	0.999
GO_RNA_CAPPING	NA	353	270	NA	-0.267604	-1.75421	0.0172414	0.09883	1		0.43795	3.01744	0	1.4226e-05	0.006
GO_SCF_DEPENDENT_PROTEASOMAL_UBIQUITIN_DEPENDENT_PROTEIN_CATABOLIC_PROCESS	NA	316	145	NA	-0.167913	-1.80928	0.0217822	0.0823613	1		0.349331	4.02343	0	0	0
GO_SECRETORY_GRANULE_ORGANIZATION	NA	543	573	NA	-0.249227	-1.49977	0.0649606	0.213899	1		0.206403	1.4554	0.0862069	0.121414	1
GO_SERINE_FAMILY_AMINO_ACID_METABOLIC_PROCESS	NA	254	592	NA	-0.312043	-1.916	0.0118577	0.0562923	1		0.186172	1.3338	0.130973	0.186877	1
GO_SIGNAL_RELEASE	NA	230	172	NA	-0.0967922	-1.96044	0.00804829	0.0480898	1		0.156573	3.80607	0	0	0
GO_SIGNAL_TRANSDUCTION_INVOLVED_IN_CELLULAR_RESPONSE_TO_AMMONIUM_ION	NA	546	287	NA	-0.172802	-1.49528	0.0698152	0.216598	1		0.290481	2.94051	0	3.06798e-05	0.014
GO_SMALL_MOLECULE_CATABOLIC_PROCESS	NA	19	372	NA	-0.158603	-3.15833	0	0	0		0.107462	2.50309	0	0.000516653	0.292
GO_SMOOTH_MUSCLE_CELL_MIGRATION	NA	563	247	NA	-0.158995	-1.47286	0.0903733	0.231646	1		0.31299	3.14122	0	7.97824e-06	0.003
GO_SPHINGOLIPID_BIOSYNTHETIC_PROCESS	NA	229	300	NA	-0.179422	-1.96109	0.00980392	0.0480815	1		0.243423	2.88045	0	4.15783e-05	0.02
GO_SPHINGOLIPID_METABOLIC_PROCESS	NA	27	151	NA	-0.218397	-2.92802	0	0.000278595	0.007		0.27418	3.97414	0	0	0
GO_SUBSTANTIA_NIGRA_DEVELOPMENT	NA	55	234	NA	-0.394214	-2.6858	0	0.001353	0.07		0.457353	3.22921	0	2.86836e-06	0.001
GO_SULFUR_COMPOUND_BIOSYNTHETIC_PROCESS	NA	214	152	NA	-0.138998	-1.99574	0.00801603	0.0420407	1		0.256264	3.97155	0	0	0
GO_SULFUR_COMPOUND_CATABOLIC_PROCESS	NA	528	519	NA	-0.20467	-1.51612	0.0687623	0.205274	1		0.211074	1.78955	0.00980392	0.0300307	1
GO_SULFUR_COMPOUND_METABOLIC_PROCESS	NA	13	149	NA	-0.163579	-3.23385	0	0	0		0.18616	3.97734	0	0	0
GO_SYNAPSE_ASSEMBLY	NA	287	140	NA	-0.128562	-1.86413	0.00421053	0.0673118	1		0.257539	4.05126	0	0	0
GO_SYNAPSE_ORGANIZATION	NA	99	13	NA	-0.106385	-2.3973	0	0.00633569	0.49		0.301362	6.87	0	0	0
GO_SYNAPTIC_TRANSMISSION_GABAERGIC	NA	171	392	NA	-0.310276	-2.09908	0.00208333	0.0282831	0.994		0.305429	2.38059	0.0020202	0.00114321	0.569
GO_SYNAPTIC_TRANSMISSION_GLUTAMATERGIC	NA	89	294	NA	-0.232826	-2.4373	0	0.0052122	0.394		0.253267	2.9148	0	3.3771e-05	0.016
GO_SYNAPTIC_VESICLE_ENDOCYTOSIS	NA	575	186	NA	-0.17603	-1.45758	0.0782779	0.24156	1		0.424102	3.64987	0	0	0
GO_SYNAPTIC_VESICLE_EXOCYTOSIS	NA	200	205	NA	-0.17147	-2.03049	0.00567108	0.0366168	1		0.28587	3.53551	0	0	0
GO_SYNAPTIC_VESICLE_LOCALIZATION	NA	199	170	NA	-0.235735	-2.03555	0	0.0357618	1		0.416667	3.81195	0	0	0
GO_SYNAPTIC_VESICLE_RECYCLING	NA	435	162	NA	-0.17914	-1.64072	0.0397614	0.14335	1		0.402382	3.89698	0	0	0
GO_SYNAPTIC_VESICLE_TRANSPORT	NA	88	222	NA	-0.316278	-2.44129	0	0.00507581	0.385		0.432802	3.32852	0	3.06233e-06	0.001
GO_T_CELL_RECEPTOR_SIGNALING_PATHWAY	NA	407	196	NA	-0.124714	-1.67583	0.0252918	0.128726	1		0.237183	3.59232	0	0	0
GO_TELOMERASE_RNA_LOCALIZATION	NA	473	289	NA	-0.312059	-1.58246	0.0537849	0.1725	1		0.585805	2.92768	0	3.01439e-05	0.014
GO_THIOESTER_BIOSYNTHETIC_PROCESS	NA	98	282	NA	-0.289709	-2.399	0	0.00630222	0.485		0.356003	2.96403	0	2.26199e-05	0.01
GO_THIOESTER_METABOLIC_PROCESS	NA	104	369	NA	-0.225401	-2.38258	0	0.00672555	0.538		0.219846	2.51356	0	0.000479563	0.274
GO_TRANSCYTOSIS	NA	477	446	NA	-0.319474	-1.57816	0.0527344	0.174262	1		0.395123	2.13511	0.00400802	0.00507821	0.989
GO_TRANSFERRIN_TRANSPORT	NA	141	394	NA	-0.349477	-2.22157	0.00399202	0.0154823	0.895		0.350304	2.36732	0.002	0.00123194	0.594
GO_TRANSFORMING_GROWTH_FACTOR_BETA_RECEPTOR_SIGNALING_PATHWAY	NA	478	445	NA	-0.114337	-1.57813	0.0489237	0.173975	1		0.135287	2.13684	0.00410678	0.00502792	0.987
GO_TRANSITION_METAL_ION_HOMEOSTASIS	NA	82	319	NA	-0.23329	-2.49376	0.00189394	0.00364242	0.275		0.226919	2.78183	0	9.10242e-05	0.046
GO_TRANSITION_METAL_ION_TRANSPORT	NA	163	299	NA	-0.196037	-2.14827	0	0.0218159	0.97		0.233283	2.88823	0	4.17548e-05	0.02
GO_TRANSLATIONAL_ELONGATION	NA	40	24	NA	-0.211773	-2.81402	0	0.000558255	0.021		0.455494	6.07415	0	0	0
GO_TRANSLATIONAL_INITIATION	NA	452	38	NA	-0.105501	-1.61598	0.0341365	0.15517	1		0.374725	5.70667	0	0	0
GO_TRANSLATIONAL_TERMINATION	NA	52	32	NA	-0.23438	-2.71031	0	0.00120419	0.058		0.489077	5.83261	0	0	0
GO_TRICARBOXYLIC_ACID_CYCLE	NA	54	235	NA	-0.406449	-2.69164	0	0.0013378	0.068		0.467611	3.22639	0	2.86287e-06	0.001
GO_UBIQUITIN_DEPENDENT_ERAD_PATHWAY	NA	329	131	NA	-0.17835	-1.79046	0.0106383	0.0876129	1		0.407023	4.09007	0	0	0
GO_VACUOLAR_ACIDIFICATION	NA	587	480	NA	-0.278004	-1.44826	0.0868726	0.245324	1		0.357433	1.94959	0.0180361	0.0138278	1
GO_VACUOLAR_TRANSPORT	NA	26	29	NA	-0.22948	-2.97793	0	0.000165305	0.004		0.42721	5.9784	0	0	0
GO_VACUOLE_ORGANIZATION	NA	25	33	NA	-0.21599	-2.97979	0	0.000171663	0.004		0.410877	5.8243	0	0	0
GO_VASCULAR_PROCESS_IN_CIRCULATORY_SYSTEM	NA	372	537	NA	-0.146688	-1.72211	0.0318725	0.110485	1		0.11463	1.70561	0.03125	0.0439317	1
GO_VASCULAR_SMOOTH_MUSCLE_CONTRACTION	NA	367	553	NA	-0.333734	-1.72415	0.0381526	0.110607	1		0.268545	1.58481	0.0480167	0.0732521	1
GO_VASODILATION	NA	598	470	NA	-0.263301	-1.43933	0.0943775	0.249468	1		0.302357	2.00258	0.00394477	0.0105491	0.999
GO_VERY_LONG_CHAIN_FATTY_ACID_METABOLIC_PROCESS	NA	101	540	NA	-0.4211	-2.39043	0	0.00652551	0.514		0.265324	1.69499	0.0316027	0.0460094	1
GO_VESICLE_BUDDING_FROM_MEMBRANE	NA	32	81	NA	-0.260069	-2.85872	0	0.000508385	0.015		0.426519	4.93661	0	0	0
GO_VESICLE_CARGO_LOADING	NA	305	326	NA	-0.376318	-1.8261	0.0146751	0.0779159	1		0.531724	2.73557	0	0.000111403	0.058
GO_VESICLE_CYTOSKELETAL_TRAFFICKING	NA	284	109	NA	-0.230807	-1.86874	0.016129	0.06645	1		0.525252	4.41163	0	0	0
GO_VESICLE_DOCKING	NA	266	127	NA	-0.207391	-1.89823	0.0142566	0.059738	1		0.447883	4.12009	0	0	0
GO_VESICLE_DOCKING_INVOLVED_IN_EXOCYTOSIS	NA	311	192	NA	-0.236924	-1.81246	0.0216963	0.0819926	1		0.460868	3.62078	0	0	0
GO_VESICLE_LOCALIZATION	NA	16	19	NA	-0.201597	-3.20398	0	0	0		0.389252	6.33639	0	0	0
GO_VESICLE_MEDIATED_TRANSPORT_IN_SYNAPSE	NA	56	72	NA	-0.170562	-2.68014	0	0.00138373	0.074		0.305922	5.0688	0	0	0
GO_VESICLE_MEDIATED_TRANSPORT_TO_THE_PLASMA_MEMBRANE	NA	92	119	NA	-0.231624	-2.43148	0.0019084	0.00526514	0.403		0.400898	4.21281	0	0	0
GO_VESICLE_ORGANIZATION	NA	15	17	NA	-0.172289	-3.21623	0	0	0		0.315661	6.4675	0	0	0
GO_VESICLE_TARGETING	NA	70	97	NA	-0.236602	-2.58773	0	0.0021313	0.145		0.408687	4.56349	0	0	0
GO_VESICLE_TARGETING_TO_FROM_OR_WITHIN_GOLGI	NA	109	142	NA	-0.24026	-2.3488	0	0.00821999	0.62		0.410577	4.04477	0	0	0
GO_VIRION_ASSEMBLY	NA	336	209	NA	-0.254836	-1.78166	0.0168067	0.0900636	1		0.479685	3.51197	0	0	0
GO_VISUAL_BEHAVIOR	NA	349	328	NA	-0.240214	-1.75805	0.0285132	0.0982224	1		0.319863	2.73183	0	0.000112815	0.059
GO_WALKING_BEHAVIOR	NA	387	400	NA	-0.300946	-1.69718	0.0348837	0.121156	1		0.351944	2.35363	0	0.00133762	0.624
GO_ZINC_ION_HOMEOSTASIS	NA	569	597	NA	-0.301089	-1.46761	0.0757895	0.234412	1		0.215829	1.28733	0.139535	0.217419	1
GO_ZINC_ION_TRANSMEMBRANE_TRANSPORT	NA	511	563	NA	-0.315519	-1.54392	0.044898	0.188556	1		0.27179	1.53419	0.0446247	0.0901765	1
