# Supplementary material for: A tumor suppressor role for EZH2 in diffuse midline glioma pathogenesis
Source: Acta Neuropathol Commun. 2022 Apr 8;10:47. doi: 10.1186/s40478-022-01336-5 (PMC8994223; doi:10.1186/s40478-022-01336-5)
Supplement: Supplementary file 6 — Additional file 6. GSEA analysis of EZH2 LOF vs. EZH2 WT in the context of PDGFB, and p53 loss. [file 40478_2022_1336_MOESM6_ESM.xlsx]

## Sheet: Hallmark
Positively enriched in NEL-CRE
NAME	SIZE	ES	NES	NOM p-val	FDR q-val	FWER p-val
HALLMARK_E2F_TARGETS	189	0.299074	4.72049	0	0	0
HALLMARK_G2M_CHECKPOINT	186	0.290972	4.53916	0	0	0
HALLMARK_INTERFERON_GAMMA_RESPONSE	161	0.191456	2.80134	0	0	0
HALLMARK_MITOTIC_SPINDLE	196	0.16175	2.57884	0	0.000141304	0.001
HALLMARK_INTERFERON_ALPHA_RESPONSE	79	0.242399	2.50749	0	0.00031334	0.003
HALLMARK_WNT_BETA_CATENIN_SIGNALING	36	0.236659	1.64908	0.032882	0.0758424	0.585
HALLMARK_MYC_TARGETS_V2	58	0.178817	1.6019	0.036961	0.0793494	0.652
Negatively enriched in NEL-CRE
NAME	SIZE	ES	NES	NOM p-val	FDR q-val	FWER p-val
HALLMARK_OXIDATIVE_PHOSPHORYLATION	176	-0.314488	-4.85842	0	0	0
HALLMARK_PROTEIN_SECRETION	91	-0.339809	-3.81576	0	0	0
HALLMARK_COAGULATION	84	-0.305829	-3.24831	0	0	0
HALLMARK_ADIPOGENESIS	179	-0.210477	-3.21344	0	0	0
HALLMARK_FATTY_ACID_METABOLISM	124	-0.21551	-2.86722	0	0	0
HALLMARK_EPITHELIAL_MESENCHYMAL_TRANSITION	163	-0.193496	-2.82134	0	0	0
HALLMARK_KRAS_SIGNALING_UP	159	-0.170855	-2.557	0	0.000767106	0.004
HALLMARK_MTORC1_SIGNALING	185	-0.161574	-2.48061	0	0.000671218	0.004
HALLMARK_HYPOXIA	163	-0.148311	-2.21161	0.00197628	0.00577563	0.037
HALLMARK_XENOBIOTIC_METABOLISM	136	-0.154475	-1.99718	0.00411523	0.0196911	0.128
HALLMARK_BILE_ACID_METABOLISM	78	-0.192083	-1.98675	0.00198807	0.0187992	0.134
HALLMARK_HEME_METABOLISM	159	-0.129564	-1.91528	0.00408163	0.0266532	0.196
HALLMARK_REACTIVE_OXYGEN_SPECIES_PATHWAY	44	-0.225587	-1.80793	0.0100806	0.0466003	0.339
HALLMARK_GLYCOLYSIS	168	-0.118335	-1.78773	0.0213592	0.0473772	0.365
HALLMARK_PEROXISOME	83	-0.165681	-1.77687	0.0144628	0.0464951	0.38
HALLMARK_TGF_BETA_SIGNALING	51	-0.208722	-1.76314	0.022	0.046411	0.391
HALLMARK_COMPLEMENT	150	-0.123388	-1.74931	0.00968992	0.0467372	0.414
HALLMARK_ANGIOGENESIS	29	-0.274185	-1.73388	0.0229645	0.0479325	0.441
HALLMARK_MYC_TARGETS_V1	192	-0.103317	-1.65978	0.0330739	0.0665426	0.577
HALLMARK_APOPTOSIS	135	-0.108203	-1.50476	0.0658436	0.125459	0.837
HALLMARK_APICAL_SURFACE	31	-0.21477	-1.43467	0.0810277	0.162186	0.904
HALLMARK_ANDROGEN_RESPONSE	84	-0.132631	-1.42528	0.109405	0.161518	0.913
HALLMARK_PI3K_AKT_MTOR_SIGNALING	94	-0.118197	-1.32883	0.160966	0.230961	0.971
HALLMARK_SPERMATOGENESIS	78	-0.125811	-1.3092	0.157692	0.23739	0.978

## Sheet: cp c2
Positively enriched in NEL-CRE
NAME	SIZE	ES	NES	NOM p-val	FDR q-val	FWER p-val
REACTOME_DNA_REPAIR	266	0.167224	3.20902	0	0	0
REACTOME_HOMOLOGY_DIRECTED_REPAIR	96	0.274003	3.15133	0	0	0
REACTOME_HDR_THROUGH_HOMOLOGOUS_RECOMBINATION_HRR	64	0.328202	3.08494	0	0	0
REACTOME_DNA_DOUBLE_STRAND_BREAK_REPAIR	122	0.234415	3.05599	0	0	0
REACTOME_CHROMOSOME_MAINTENANCE	66	0.319211	3.0324	0	0	0
KEGG_DNA_REPLICATION	35	0.416562	2.91018	0	0.00036924	0.003
REACTOME_CELL_CYCLE_MITOTIC	467	0.115791	2.87529	0	0.000422793	0.004
PID_FOXM1_PATHWAY	39	0.379102	2.84646	0	0.000369944	0.004
REACTOME_RESOLUTION_OF_D_LOOP_STRUCTURES	32	0.417106	2.78558	0	0.000822789	0.009
REACTOME_DNA_STRAND_ELONGATION	32	0.405728	2.74717	0	0.000885784	0.011
REACTOME_PKMTS_METHYLATE_HISTONE_LYSINES	42	0.362974	2.72676	0	0.00100212	0.014
PID_E2F_PATHWAY	66	0.276158	2.6588	0	0.00153076	0.024
REACTOME_HOMOLOGOUS_DNA_PAIRING_AND_STRAND_EXCHANGE	41	0.360142	2.6354	0	0.0016381	0.028
REACTOME_SUMOYLATION	154	0.182989	2.62021	0	0.00188437	0.035
REACTOME_TRANSCRIPTIONAL_REGULATION_BY_E2F6	34	0.375064	2.60672	0	0.00200226	0.04
REACTOME_SUMOYLATION_OF_DNA_METHYLATION_PROTEINS	16	0.531533	2.56299	0	0.00283952	0.061
REACTOME_REPRODUCTION	52	0.294458	2.54816	0.0018797	0.00310619	0.071
REACTOME_OXIDATIVE_STRESS_INDUCED_SENESCENCE	59	0.279552	2.54086	0	0.00317865	0.077
REACTOME_MEIOSIS	46	0.307749	2.5408	0.00200401	0.00301135	0.077
REACTOME_CELL_CYCLE_CHECKPOINTS	237	0.143322	2.52261	0	0.00319709	0.084
REACTOME_PROCESSING_OF_DNA_DOUBLE_STRAND_BREAK_ENDS	57	0.286966	2.51916	0	0.00308023	0.084
REACTOME_REGULATION_OF_TP53_ACTIVITY	142	0.181668	2.50749	0.00204082	0.00334282	0.095
REACTOME_RESOLUTION_OF_D_LOOP_STRUCTURES_THROUGH_SYNTHESIS_DEPENDENT_STRAND_ANNEALING_SDSA	25	0.421897	2.50717	0.00212766	0.00322885	0.096
REACTOME_CELLULAR_SENESCENCE	117	0.195418	2.49651	0	0.0033999	0.105
REACTOME_RHO_GTPASES_ACTIVATE_FORMINS	125	0.186543	2.44554	0	0.00467382	0.149
REACTOME_REGULATION_OF_TP53_ACTIVITY_THROUGH_PHOSPHORYLATION	81	0.229332	2.43246	0	0.0050263	0.163
REACTOME_MITOTIC_PROMETAPHASE	186	0.157254	2.41942	0	0.00519123	0.172
REACTOME_DEPOSITION_OF_NEW_CENPA_CONTAINING_NUCLEOSOMES_AT_THE_CENTROMERE	25	0.410259	2.41148	0	0.00519121	0.179
REACTOME_CHROMATIN_MODIFYING_ENZYMES	194	0.150004	2.40895	0	0.00511278	0.182
REACTOME_ACTIVATION_OF_ATR_IN_RESPONSE_TO_REPLICATION_STRESS	37	0.329787	2.40874	0	0.00494235	0.182
REACTOME_POLO_LIKE_KINASE_MEDIATED_EVENTS	16	0.493547	2.39351	0	0.00542322	0.206
REACTOME_ACTIVATION_OF_THE_PRE_REPLICATIVE_COMPLEX	32	0.35252	2.38606	0	0.00545911	0.213
PID_FANCONI_PATHWAY	44	0.298787	2.38548	0	0.00533847	0.214
PID_RB_1PATHWAY	56	0.268092	2.36676	0	0.00597465	0.245
REACTOME_HDR_THROUGH_SINGLE_STRAND_ANNEALING_SSA	36	0.336152	2.36332	0	0.00598975	0.251
KEGG_NOTCH_SIGNALING_PATHWAY	45	0.289463	2.36022	0	0.0059451	0.255
REACTOME_INTERFERON_SIGNALING	141	0.165944	2.32048	0	0.00844706	0.343
PID_ATR_PATHWAY	39	0.314659	2.31783	0.002	0.00843844	0.35
KEGG_HOMOLOGOUS_RECOMBINATION	25	0.380326	2.31585	0	0.00829675	0.352
REACTOME_FORMATION_OF_THE_BETA_CATENIN_TCF_TRANSACTIVATING_COMPLEX	31	0.348464	2.28606	0	0.00977411	0.405
REACTOME_BASE_EXCISION_REPAIR	44	0.279482	2.25524	0	0.011718	0.479
REACTOME_INTERFERON_GAMMA_SIGNALING	57	0.254337	2.22331	0	0.0142011	0.553
KEGG_BASE_EXCISION_REPAIR	33	0.318561	2.20461	0	0.0156429	0.589
REACTOME_MEIOTIC_RECOMBINATION	22	0.388358	2.19015	0.00408163	0.0166565	0.617
REACTOME_MITOTIC_SPINDLE_CHECKPOINT	104	0.183121	2.17331	0	0.0183255	0.664
REACTOME_INTERFERON_ALPHA_BETA_SIGNALING	42	0.290733	2.16851	0.00212766	0.0183757	0.676
REACTOME_TELOMERE_C_STRAND_LAGGING_STRAND_SYNTHESIS	27	0.34527	2.16834	0	0.0179848	0.676
REACTOME_G1_S_SPECIFIC_TRANSCRIPTION	28	0.335198	2.14311	0	0.0210747	0.731
REACTOME_TRANSLESION_SYNTHESIS_BY_Y_FAMILY_DNA_POLYMERASES_BYPASSES_LESIONS_ON_DNA_TEMPLATE	35	0.301977	2.10472	0.0018622	0.026177	0.815
REACTOME_BASE_EXCISION_REPAIR_AP_SITE_FORMATION	16	0.429393	2.10466	0	0.0256677	0.815
REACTOME_RESOLUTION_OF_ABASIC_SITES_AP_SITES	38	0.285824	2.10215	0.00393701	0.0255096	0.823
REACTOME_SUMOYLATION_OF_TRANSCRIPTION_COFACTORS	40	0.278103	2.0867	0.00601202	0.0280238	0.851
REACTOME_TERMINATION_OF_TRANSLESION_DNA_SYNTHESIS	29	0.323563	2.07834	0.00386847	0.0290336	0.865
REACTOME_SUMOYLATION_OF_CHROMATIN_ORGANIZATION_PROTEINS	52	0.243729	2.07714	0.00200803	0.0286854	0.868
REACTOME_TELOMERE_MAINTENANCE	42	0.268697	2.07028	0.00201207	0.0292569	0.879
REACTOME_SUMOYLATION_OF_DNA_DAMAGE_RESPONSE_AND_REPAIR_PROTEINS	73	0.204754	2.07009	0	0.0287998	0.879
REACTOME_LAGGING_STRAND_SYNTHESIS	20	0.380327	2.05818	0.00383142	0.0303227	0.889
REACTOME_SIGNALING_BY_RHO_GTPASES	355	0.095118	2.05188	0	0.0310153	0.901
REACTOME_G2_M_DNA_DAMAGE_CHECKPOINT	54	0.239362	2.04829	0	0.0312745	0.91
PID_P73PATHWAY	63	0.221055	2.0446	0.00383877	0.0315234	0.917
REACTOME_EXTENSION_OF_TELOMERES	42	0.268697	2.0353	0	0.0329079	0.931
REACTOME_SIGNALING_BY_NOTCH3	45	0.255829	2.02728	0.00204918	0.0338067	0.938
PID_IL12_2PATHWAY	34	0.287536	2.01651	0.00199203	0.0356847	0.947
REACTOME_NOTCH3_INTRACELLULAR_DOMAIN_REGULATES_TRANSCRIPTION	24	0.331133	1.99552	0.00788955	0.0397606	0.967
REACTOME_RESOLUTION_OF_SISTER_CHROMATID_COHESION	112	0.164531	1.9954	0.00390625	0.0391825	0.967
REACTOME_SUMOYLATION_OF_RNA_BINDING_PROTEINS	44	0.25096	1.97678	0	0.0432171	0.982
KEGG_CELL_CYCLE	117	0.157149	1.97257	0.00588235	0.0436355	0.985
BIOCARTA_MAPK_PATHWAY	79	0.186132	1.96503	0.00782779	0.0446262	0.987
REACTOME_POSTMITOTIC_NUCLEAR_PORE_COMPLEX_NPC_REFORMATION	26	0.324789	1.95544	0.010101	0.0466166	0.991
KEGG_BASAL_CELL_CARCINOMA	36	0.277599	1.95245	0.012024	0.0467384	0.992
REACTOME_G0_AND_EARLY_G1	26	0.32689	1.95138	0.00803213	0.0462658	0.992
PID_SMAD2_3PATHWAY	16	0.404519	1.9453	0.00592885	0.0474413	0.994
PID_DELTA_NP63_PATHWAY	36	0.269664	1.94281	0.00609756	0.0474458	0.994
KEGG_PRIMARY_IMMUNODEFICIENCY	17	0.399744	1.94084	0.00195695	0.0474425	0.995
REACTOME_NOTCH_HLH_TRANSCRIPTION_PATHWAY	28	0.302795	1.92297	0.012024	0.0516765	0.995
REACTOME_ANCHORING_OF_THE_BASAL_BODY_TO_THE_PLASMA_MEMBRANE	94	0.169681	1.90225	0.0197628	0.0572128	0.999
REACTOME_PROCESSIVE_SYNTHESIS_ON_THE_LAGGING_STRAND	15	0.406739	1.89791	0.0142566	0.0579969	0.999
REACTOME_RESOLUTION_OF_AP_SITES_VIA_THE_MULTIPLE_NUCLEOTIDE_PATCH_REPLACEMENT_PATHWAY	25	0.311911	1.87464	0.00984252	0.0652486	0.999
REACTOME_TRANSCRIPTIONAL_REGULATION_BY_TP53	314	0.0902353	1.86178	0.00598802	0.0689268	1
REACTOME_REGULATION_OF_TP53_ACTIVITY_THROUGH_ACETYLATION	28	0.292	1.84957	0.00986193	0.0733071	1
REACTOME_NRAGE_SIGNALS_DEATH_THROUGH_JNK	55	0.213623	1.84609	0.00622407	0.0741197	1
KEGG_BLADDER_CANCER	35	0.260946	1.84164	0.00630252	0.0749485	1
REACTOME_SUMOYLATION_OF_DNA_REPLICATION_PROTEINS	43	0.244048	1.83642	0.0159681	0.0762623	1
REACTOME_TRANSCRIPTIONAL_REGULATION_OF_GRANULOPOIESIS	27	0.298042	1.82211	0.00575816	0.0816788	1
KEGG_CYTOSOLIC_DNA_SENSING_PATHWAY	35	0.260677	1.81804	0.011257	0.0824901	1
REACTOME_FANCONI_ANEMIA_PATHWAY	35	0.256918	1.79862	0.013308	0.0904145	1
BIOCARTA_CARM_ER_PATHWAY	24	0.305108	1.79053	0.0123711	0.0933861	1
REACTOME_PRE_NOTCH_EXPRESSION_AND_PROCESSING	46	0.222042	1.78826	0.0198413	0.0934749	1
REACTOME_RHO_GTPASE_EFFECTORS	235	0.0991254	1.76752	0.0197239	0.102628	1
REACTOME_RUNX1_REGULATES_GENES_INVOLVED_IN_MEGAKARYOCYTE_DIFFERENTIATION_AND_PLATELET_FUNCTION	34	0.257364	1.76507	0.018797	0.102779	1
BIOCARTA_G2_PATHWAY	23	0.304943	1.76282	0.0191083	0.102842	1
REACTOME_SIGNALING_BY_NOTCH2	28	0.280158	1.76138	0.0143737	0.102354	1
REACTOME_POLYMERASE_SWITCHING_ON_THE_C_STRAND_OF_THE_TELOMERE	17	0.353737	1.75938	0.0284553	0.102183	1
PID_PLK1_PATHWAY	45	0.222713	1.75452	0.0191939	0.103637	1
KEGG_MISMATCH_REPAIR	22	0.306251	1.7516	0.0216963	0.104244	1
REACTOME_M_PHASE	330	0.0833281	1.73818	0.015748	0.111037	1
PID_HIV_NEF_PATHWAY	31	0.263784	1.73489	0.0313725	0.111571	1
BIOCARTA_NFKB_PATHWAY	20	0.32873	1.73359	0.0251451	0.111283	1
REACTOME_RUNX1_INTERACTS_WITH_CO_FACTORS_WHOSE_PRECISE_EFFECT_ON_RUNX1_TARGETS_IS_NOT_KNOWN	37	0.235095	1.7231	0.0184426	0.116581	1
REACTOME_ONCOGENE_INDUCED_SENESCENCE	31	0.253709	1.72212	0.0199601	0.115904	1
KEGG_INTESTINAL_IMMUNE_NETWORK_FOR_IGA_PRODUCTION	16	0.356822	1.71912	0.0258449	0.116306	1
REACTOME_MISMATCH_REPAIR	15	0.370365	1.71907	0.0166667	0.115188	1
REACTOME_EPIGENETIC_REGULATION_OF_GENE_EXPRESSION	86	0.159766	1.71662	0.0254545	0.115656	1
REACTOME_TRANSPORT_OF_THE_SLBP_DEPENDANT_MATURE_MRNA	33	0.241508	1.70506	0.0244399	0.121791	1
REACTOME_PCNA_DEPENDENT_LONG_PATCH_BASE_EXCISION_REPAIR	21	0.311818	1.69378	0.0296443	0.127774	1
REACTOME_INTERACTIONS_OF_REV_WITH_HOST_CELLULAR_PROTEINS	34	0.241801	1.68679	0.0202429	0.130578	1
BIOCARTA_DEATH_PATHWAY	28	0.265696	1.68535	0.0421687	0.13036	1
BIOCARTA_STRESS_PATHWAY	23	0.292086	1.66977	0.0302419	0.139623	1
REACTOME_RNA_POLYMERASE_III_TRANSCRIPTION_INITIATION_FROM_TYPE_3_PROMOTER	26	0.265015	1.66889	0.0218688	0.139023	1
KEGG_AMINOACYL_TRNA_BIOSYNTHESIS	22	0.295878	1.66871	0.0352251	0.137898	1
REACTOME_DNA_DAMAGE_BYPASS	44	0.212274	1.66299	0.0361217	0.140349	1
REACTOME_BUTYRATE_RESPONSE_FACTOR_1_BRF1_BINDS_AND_DESTABILIZES_MRNA	16	0.339229	1.63843	0.0400802	0.156259	1
PID_SMAD2_3NUCLEAR_PATHWAY	70	0.16489	1.63689	0.0308285	0.156054	1
REACTOME_POSITIVE_EPIGENETIC_REGULATION_OF_RRNA_EXPRESSION	45	0.208768	1.63474	0.0356394	0.15626	1
REACTOME_EXPORT_OF_VIRAL_RIBONUCLEOPROTEINS_FROM_NUCLEUS	30	0.255485	1.63277	0.035865	0.156436	1
REACTOME_TRANSPORT_OF_MATURE_TRANSCRIPT_TO_CYTOPLASM	77	0.155073	1.63227	0.0474227	0.155504	1
REACTOME_MEIOTIC_SYNAPSIS	25	0.274392	1.63025	0.0376238	0.155597	1
KEGG_PATHWAYS_IN_CANCER	267	0.0853487	1.62696	0.0503145	0.157015	1
REACTOME_TRANSPORT_OF_MATURE_MRNAS_DERIVED_FROM_INTRONLESS_TRANSCRIPTS	40	0.213585	1.62529	0.0434783	0.156882	1
PID_CMYB_PATHWAY	64	0.169379	1.62112	0.0225141	0.15877	1
BIOCARTA_HIVNEF_PATHWAY	52	0.188875	1.61791	0.0516899	0.159813	1
REACTOME_DEATH_RECEPTOR_SIGNALLING	127	0.120881	1.59474	0.046875	0.177024	1
PID_AURORA_B_PATHWAY	36	0.226457	1.5934	0.0378486	0.176778	1
REACTOME_TRANSCRIPTIONAL_REGULATION_BY_RUNX1	158	0.108431	1.58701	0.0510806	0.180705	1
REACTOME_NOTCH4_INTRACELLULAR_DOMAIN_REGULATES_TRANSCRIPTION	20	0.29546	1.58157	0.0587045	0.183658	1
PID_NFKAPPAB_CANONICAL_PATHWAY	22	0.289649	1.57943	0.0651731	0.184113	1
REACTOME_RNA_POLYMERASE_III_TRANSCRIPTION	39	0.213841	1.57808	0.0575397	0.183827	1
REACTOME_CYTOSOLIC_SENSORS_OF_PATHOGEN_ASSOCIATED_DNA	55	0.182309	1.5771	0.0437376	0.183194	1
REACTOME_TRANSCRIPTION_OF_E2F_TARGETS_UNDER_NEGATIVE_CONTROL_BY_DREAM_COMPLEX	19	0.3073	1.57632	0.0513347	0.182319	1
REACTOME_KSRP_KHSRP_BINDS_AND_DESTABILIZES_MRNA	16	0.321364	1.57451	0.0516529	0.182512	1
KEGG_ADHERENS_JUNCTION	70	0.155566	1.5596	0.0554455	0.194065	1
KEGG_DORSO_VENTRAL_AXIS_FORMATION	19	0.296015	1.55301	0.0526316	0.198491	1
REACTOME_HS_GAG_BIOSYNTHESIS	26	0.255063	1.55218	0.045738	0.19772	1
REACTOME_ACTIVATION_OF_ANTERIOR_HOX_GENES_IN_HINDBRAIN_DEVELOPMENT_DURING_EARLY_EMBRYOGENESIS	52	0.183549	1.55165	0.0468432	0.196698	1
BIOCARTA_IL1R_PATHWAY	24	0.266711	1.55133	0.0540541	0.195496	1
BIOCARTA_TNFR2_PATHWAY	16	0.316117	1.54656	0.0559006	0.198302	1
REACTOME_NUCLEAR_IMPORT_OF_REV_PROTEIN	31	0.231674	1.53676	0.0673267	0.20589	1
REACTOME_RNA_POLYMERASE_III_TRANSCRIPTION_TERMINATION	22	0.272918	1.53462	0.0648536	0.206342	1
REACTOME_RNA_POLYMERASE_III_TRANSCRIPTION_INITIATION_FROM_TYPE_1_PROMOTER	27	0.252777	1.53443	0.0546559	0.205044	1
REACTOME_DNA_DAMAGE_TELOMERE_STRESS_INDUCED_SENESCENCE	24	0.262684	1.533	0.0580271	0.204975	1
PID_NOTCH_PATHWAY	53	0.181424	1.53195	0.055666	0.204453	1
REACTOME_TRNA_MODIFICATION_IN_THE_NUCLEUS_AND_CYTOSOL	36	0.210645	1.52537	0.0669456	0.208931	1
REACTOME_REGULATION_OF_TP53_ACTIVITY_THROUGH_METHYLATION	16	0.31622	1.51936	0.0533881	0.213119	1
REACTOME_TRANSCRIPTIONAL_REGULATION_BY_RUNX3	90	0.137349	1.51598	0.0664062	0.21503	1
REACTOME_AURKA_ACTIVATION_BY_TPX2	71	0.153846	1.51564	0.065678	0.213927	1
REACTOME_MITOCHONDRIAL_TRNA_AMINOACYLATION	18	0.300847	1.51122	0.0677966	0.216737	1
PID_BARD1_PATHWAY	27	0.248526	1.51071	0.0760234	0.215706	1
REACTOME_TP53_REGULATES_TRANSCRIPTION_OF_CELL_CYCLE_GENES	45	0.18963	1.50831	0.0776892	0.216711	1
REACTOME_NUCLEAR_ENVELOPE_BREAKDOWN	50	0.185715	1.50621	0.0677291	0.217313	1
REACTOME_CELL_DEATH_SIGNALLING_VIA_NRAGE_NRIF_AND_NADE	70	0.152504	1.50616	0.0722656	0.215893	1
REACTOME_ERCC6_CSB_AND_EHMT2_G9A_POSITIVELY_REGULATE_RRNA_EXPRESSION	16	0.309617	1.50558	0.0717132	0.214973	1
REACTOME_REGULATION_OF_GLUCOKINASE_BY_GLUCOKINASE_REGULATORY_PROTEIN	27	0.244773	1.50497	0.0687023	0.214139	1
REACTOME_FACTORS_INVOLVED_IN_MEGAKARYOCYTE_DEVELOPMENT_AND_PLATELET_PRODUCTION	113	0.122132	1.49424	0.0811881	0.22334	1
KEGG_TYPE_II_DIABETES_MELLITUS	40	0.197802	1.48425	0.0701031	0.232039	1
BIOCARTA_CASPASE_PATHWAY	19	0.284699	1.48229	0.079922	0.232566	1
BIOCARTA_NTHI_PATHWAY	20	0.27195	1.47853	0.0653061	0.234776	1
REACTOME_ZBP1_DAI_MEDIATED_INDUCTION_OF_TYPE_I_IFNS	20	0.274923	1.47802	0.0970297	0.233828	1
REACTOME_RHO_GTPASE_CYCLE	130	0.11292	1.47743	0.090535	0.23287	1
BIOCARTA_G1_PATHWAY	26	0.24186	1.46878	0.0882957	0.240199	1
Negatively enriched in NEL-CRE
NAME	SIZE	ES	NES	NOM p-val	FDR q-val	FWER p-val
REACTOME_ASPARAGINE_N_LINKED_GLYCOSYLATION	267	-0.201811	-3.81674	0	0	0
KEGG_OXIDATIVE_PHOSPHORYLATION	83	-0.366538	-3.79999	0	0	0
REACTOME_TRANSPORT_TO_THE_GOLGI_AND_SUBSEQUENT_MODIFICATION	161	-0.249676	-3.75428	0	0	0
REACTOME_THE_CITRIC_ACID_TCA_CYCLE_AND_RESPIRATORY_ELECTRON_TRANSPORT	134	-0.271013	-3.69735	0	0	0
REACTOME_ER_TO_GOLGI_ANTEROGRADE_TRANSPORT	135	-0.273588	-3.67094	0	0	0
REACTOME_COPI_MEDIATED_ANTEROGRADE_TRANSPORT	86	-0.325352	-3.54607	0	0	0
REACTOME_RESPIRATORY_ELECTRON_TRANSPORT	86	-0.322501	-3.48844	0	0	0
KEGG_PARKINSONS_DISEASE	86	-0.307824	-3.37767	0	0	0
REACTOME_RESPIRATORY_ELECTRON_TRANSPORT_ATP_SYNTHESIS_BY_CHEMIOSMOTIC_COUPLING_AND_HEAT_PRODUCTION_BY_UNCOUPLING_PROTEINS	89	-0.301135	-3.35426	0	0	0
REACTOME_COPI_INDEPENDENT_GOLGI_TO_ER_RETROGRADE_TRAFFIC	44	-0.428631	-3.35247	0	0	0
REACTOME_TRANSPORT_OF_SMALL_MOLECULES	498	-0.127085	-3.2782	0	0	0
REACTOME_NEUTROPHIL_DEGRANULATION	341	-0.155007	-3.22934	0	0	0
KEGG_ALZHEIMERS_DISEASE	125	-0.253541	-3.22496	0	0	0
REACTOME_NEURONAL_SYSTEM	330	-0.144816	-3.07477	0	0	0
REACTOME_HEMOSTASIS	435	-0.12606	-3.05172	0	0	0
REACTOME_COMPLEX_I_BIOGENESIS	48	-0.361914	-2.99505	0	0	0
REACTOME_MHC_CLASS_II_ANTIGEN_PRESENTATION	93	-0.262926	-2.98481	0	0	0
REACTOME_PLATELET_ACTIVATION_SIGNALING_AND_AGGREGATION	203	-0.1827	-2.94696	0	0.000138111	0.002
KEGG_CITRATE_CYCLE_TCA_CYCLE	26	-0.482503	-2.94457	0	0.000130842	0.002
KEGG_HUNTINGTONS_DISEASE	136	-0.214053	-2.90883	0	0.0001243	0.002
REACTOME_NEUROTRANSMITTER_RECEPTORS_AND_POSTSYNAPTIC_SIGNAL_TRANSMISSION	161	-0.197368	-2.87624	0	0.000179917	0.003
REACTOME_EXTRA_NUCLEAR_ESTROGEN_SIGNALING	62	-0.309352	-2.84675	0	0.000285973	0.005
REACTOME_AUTOPHAGY	132	-0.213195	-2.81617	0	0.000491466	0.009
REACTOME_INTRA_GOLGI_AND_RETROGRADE_GOLGI_TO_ER_TRAFFIC	179	-0.185431	-2.80807	0	0.000470988	0.009
REACTOME_HSP90_CHAPERONE_CYCLE_FOR_STEROID_HORMONE_RECEPTORS_SHR	48	-0.340498	-2.76258	0	0.000554252	0.011
REACTOME_REGULATION_OF_INSULIN_LIKE_GROWTH_FACTOR_IGF_TRANSPORT_AND_UPTAKE_BY_INSULIN_LIKE_GROWTH_FACTOR_BINDING_PROTEINS_IGFBPS	74	-0.272009	-2.75301	0	0.000582247	0.012
KEGG_LYSOSOME	108	-0.229038	-2.73096	0	0.000845987	0.018
REACTOME_MITOCHONDRIAL_TRANSLATION	92	-0.238726	-2.71892	0	0.000950353	0.021
REACTOME_PROTEIN_LOCALIZATION	139	-0.193048	-2.70677	0	0.00113574	0.026
REACTOME_TRANSMISSION_ACROSS_CHEMICAL_SYNAPSES	215	-0.160167	-2.68224	0	0.00126709	0.03
REACTOME_COOPERATION_OF_PREFOLDIN_AND_TRIC_CCT_IN_ACTIN_AND_TUBULIN_FOLDING	25	-0.441826	-2.67048	0	0.00130798	0.032
REACTOME_PYRUVATE_METABOLISM_AND_CITRIC_ACID_TCA_CYCLE	49	-0.31759	-2.65159	0	0.00142666	0.036
REACTOME_FORMATION_OF_TUBULIN_FOLDING_INTERMEDIATES_BY_CCT_TRIC	18	-0.521357	-2.63392	0.00423729	0.00173316	0.045
REACTOME_RESPONSE_TO_ELEVATED_PLATELET_CYTOSOLIC_CA2	98	-0.227289	-2.62367	0	0.00179112	0.048
REACTOME_COOPERATION_OF_PDCL_PHLP1_AND_TRIC_CCT_IN_G_PROTEIN_BETA_FOLDING	34	-0.370339	-2.57759	0	0.00221169	0.06
REACTOME_BRANCHED_CHAIN_AMINO_ACID_CATABOLISM	21	-0.462952	-2.56982	0	0.00225828	0.063
REACTOME_GABA_RECEPTOR_ACTIVATION	47	-0.311484	-2.54937	0	0.00260214	0.074
REACTOME_IRON_UPTAKE_AND_TRANSPORT	44	-0.331275	-2.52954	0	0.00319726	0.093
REACTOME_HEDGEHOG_LIGAND_BIOGENESIS	57	-0.284791	-2.52883	0	0.00311528	0.093
REACTOME_INSULIN_RECEPTOR_RECYCLING	18	-0.484878	-2.49302	0	0.00386559	0.116
REACTOME_SPHINGOLIPID_METABOLISM	73	-0.247699	-2.4843	0	0.00407802	0.123
REACTOME_RAB_GERANYLGERANYLATION	52	-0.284206	-2.45945	0	0.00464745	0.144
REACTOME_COPII_MEDIATED_VESICLE_TRANSPORT	62	-0.266364	-2.457	0	0.00456929	0.144
REACTOME_PLATELET_HOMEOSTASIS	67	-0.259784	-2.45118	0	0.00466466	0.149
REACTOME_TRANSLATION	252	-0.137449	-2.44342	0	0.00475918	0.156
REACTOME_METABOLISM_OF_AMINO_ACIDS_AND_DERIVATIVES	264	-0.127704	-2.43225	0	0.00518267	0.168
REACTOME_PROTEIN_FOLDING	86	-0.222799	-2.42975	0	0.00520827	0.171
REACTOME_DEGRADATION_OF_AXIN	51	-0.287539	-2.41491	0	0.00591962	0.198
REACTOME_REGULATION_OF_RAS_BY_GAPS	63	-0.259654	-2.39968	0	0.00633929	0.213
REACTOME_REGULATION_OF_PTEN_STABILITY_AND_ACTIVITY	64	-0.249954	-2.3962	0	0.00633756	0.217
KEGG_LONG_TERM_DEPRESSION	57	-0.260461	-2.35533	0.00212766	0.00867647	0.3
REACTOME_GAP_JUNCTION_TRAFFICKING_AND_REGULATION	28	-0.370893	-2.34526	0.00413223	0.00928926	0.325
REACTOME_ACTIVATION_OF_NMDA_RECEPTORS_AND_POSTSYNAPTIC_EVENTS	82	-0.219471	-2.34279	0	0.0092073	0.328
REACTOME_FATTY_ACID_METABOLISM	125	-0.178007	-2.33847	0.00204918	0.00922338	0.335
REACTOME_NEDDYLATION	202	-0.140133	-2.33691	0.0019084	0.00912423	0.338
REACTOME_SIGNALING_BY_INSULIN_RECEPTOR	52	-0.276298	-2.33038	0	0.00947344	0.353
KEGG_LONG_TERM_POTENTIATION	65	-0.245729	-2.32157	0.00204918	0.00981443	0.372
KEGG_VASOPRESSIN_REGULATED_WATER_REABSORPTION	36	-0.32238	-2.31459	0.00621118	0.0101014	0.387
REACTOME_RAB_GEFS_EXCHANGE_GTP_FOR_GDP_ON_RABS	82	-0.21642	-2.31053	0	0.0101211	0.393
REACTOME_GOLGI_TO_ER_RETROGRADE_TRANSPORT	117	-0.18409	-2.31025	0	0.00997378	0.394
REACTOME_THE_ROLE_OF_GTSE1_IN_G2_M_PROGRESSION_AFTER_G2_CHECKPOINT	66	-0.239006	-2.30419	0	0.0101612	0.401
REACTOME_ADP_SIGNALLING_THROUGH_P2Y_PURINOCEPTOR_12	17	-0.470403	-2.29479	0	0.0106116	0.421
BIOCARTA_AT1R_PATHWAY	26	-0.371697	-2.26056	0.002	0.0128889	0.489
KEGG_VIBRIO_CHOLERAE_INFECTION	43	-0.290142	-2.25267	0.0020202	0.013425	0.508
REACTOME_DEGRADATION_OF_GLI1_BY_THE_PROTEASOME	53	-0.265768	-2.24519	0	0.0139017	0.523
REACTOME_BBSOME_MEDIATED_CARGO_TARGETING_TO_CILIUM	21	-0.407853	-2.23266	0.0041841	0.0145137	0.542
REACTOME_CARDIAC_CONDUCTION	98	-0.188268	-2.22429	0	0.0153076	0.572
REACTOME_CLATHRIN_MEDIATED_ENDOCYTOSIS	123	-0.171997	-2.22106	0.00401606	0.0153641	0.581
REACTOME_DARPP_32_EVENTS	22	-0.40464	-2.2181	0	0.0152679	0.584
REACTOME_OPIOID_SIGNALLING	79	-0.211558	-2.21111	0	0.0158263	0.602
REACTOME_CITRIC_ACID_CYCLE_TCA_CYCLE	21	-0.399776	-2.20953	0.00208333	0.0157659	0.605
REACTOME_INWARDLY_RECTIFYING_K_CHANNELS	25	-0.377639	-2.1965	0	0.0167566	0.629
REACTOME_FLT3_SIGNALING	217	-0.125286	-2.18946	0	0.0173639	0.65
REACTOME_CLASS_I_MHC_MEDIATED_ANTIGEN_PROCESSING_PRESENTATION	317	-0.107516	-2.18341	0	0.0178019	0.66
REACTOME_SIGNALING_BY_RECEPTOR_TYROSINE_KINASES	433	-0.0949379	-2.18138	0	0.017734	0.664
REACTOME_TRANSFERRIN_ENDOCYTOSIS_AND_RECYCLING	22	-0.399023	-2.17565	0.0019685	0.0182614	0.683
KEGG_REGULATION_OF_AUTOPHAGY	18	-0.413549	-2.17392	0	0.0182695	0.692
REACTOME_CROSS_PRESENTATION_OF_SOLUBLE_EXOGENOUS_ANTIGENS_ENDOSOMES	44	-0.273337	-2.17361	0	0.018051	0.692
REACTOME_SEALING_OF_THE_NUCLEAR_ENVELOPE_NE_BY_ESCRT_III	23	-0.371536	-2.17225	0	0.0179516	0.697
BIOCARTA_EDG1_PATHWAY	22	-0.38082	-2.16841	0.00193424	0.0181074	0.707
KEGG_TIGHT_JUNCTION	98	-0.186392	-2.16718	0	0.0180719	0.71
REACTOME_ABC_TRANSPORTER_DISORDERS	66	-0.226481	-2.15893	0	0.0189482	0.73
KEGG_SPHINGOLIPID_METABOLISM	34	-0.310018	-2.15367	0	0.0192942	0.738
REACTOME_PLATELET_CALCIUM_HOMEOSTASIS	21	-0.379581	-2.14483	0.00395257	0.0200888	0.755
REACTOME_DEFECTIVE_CFTR_CAUSES_CYSTIC_FIBROSIS	56	-0.242613	-2.14318	0.00566038	0.0200627	0.759
REACTOME_FC_EPSILON_RECEPTOR_FCERI_SIGNALING	118	-0.169872	-2.14269	0.00197628	0.019872	0.76
REACTOME_EPHB_MEDIATED_FORWARD_SIGNALING	42	-0.268684	-2.14034	0.00386847	0.0200652	0.77
REACTOME_PHOSPHOLIPID_METABOLISM	175	-0.138311	-2.12771	0	0.0215905	0.79
REACTOME_L1CAM_INTERACTIONS	105	-0.17735	-2.1178	0.00192678	0.0228661	0.809
PID_ERBB1_DOWNSTREAM_PATHWAY	102	-0.180606	-2.10819	0	0.0239455	0.82
KEGG_PATHOGENIC_ESCHERICHIA_COLI_INFECTION	45	-0.267777	-2.10738	0.00199203	0.023822	0.824
REACTOME_ANTIGEN_PROCESSING_UBIQUITINATION_PROTEASOME_DEGRADATION	268	-0.11115	-2.10237	0.00195312	0.02454	0.834
REACTOME_CLASS_I_PEROXISOMAL_MEMBRANE_PROTEIN_IMPORT	20	-0.398628	-2.099	0	0.024647	0.842
REACTOME_ENDOSOMAL_SORTING_COMPLEX_REQUIRED_FOR_TRANSPORT_ESCRT	27	-0.332039	-2.09792	0.00194553	0.0245993	0.843
REACTOME_CTLA4_INHIBITORY_SIGNALING	19	-0.408123	-2.09609	0.0020284	0.0245959	0.844
REACTOME_NEGATIVE_REGULATION_OF_NOTCH4_SIGNALING	51	-0.248645	-2.08799	0.00380228	0.025573	0.859
KEGG_PURINE_METABOLISM	125	-0.157936	-2.0876	0.0106383	0.0253745	0.86
REACTOME_SIGNALING_BY_GPCR	408	-0.0911996	-2.08432	0.00194553	0.0256872	0.867
NABA_ECM_REGULATORS	126	-0.158399	-2.08283	0.00197239	0.0255809	0.867
REACTOME_ABC_FAMILY_PROTEINS_MEDIATED_TRANSPORT	87	-0.192954	-2.08106	0	0.0257154	0.871
REACTOME_DEGRADATION_OF_DVL	53	-0.244124	-2.08037	0.00391389	0.0255234	0.873
REACTOME_CARGO_TRAFFICKING_TO_THE_PERICILIARY_MEMBRANE	45	-0.26263	-2.07633	0.00205339	0.0260187	0.878
REACTOME_PI_METABOLISM	77	-0.202337	-2.07309	0.00399202	0.0263575	0.883
REACTOME_SIGNALING_BY_NUCLEAR_RECEPTORS	193	-0.128643	-2.07297	0.00189394	0.0261406	0.884
REACTOME_DEGRADATION_OF_BETA_CATENIN_BY_THE_DESTRUCTION_COMPLEX	79	-0.193491	-2.06544	0	0.0272293	0.898
KEGG_GAP_JUNCTION	76	-0.199541	-2.0654	0.00196464	0.0269724	0.898
REACTOME_G_PROTEIN_ACTIVATION	19	-0.389864	-2.06078	0.00609756	0.0272414	0.904
REACTOME_TRANS_GOLGI_NETWORK_VESICLE_BUDDING	65	-0.214518	-2.06064	0.00389105	0.0270012	0.904
REACTOME_SYNTHESIS_OF_PIPS_AT_THE_GOLGI_MEMBRANE	15	-0.430891	-2.05872	0	0.027152	0.912
REACTOME_SELECTIVE_AUTOPHAGY	68	-0.210612	-2.05471	0.00595238	0.0275627	0.917
REACTOME_NEUROTRANSMITTER_RELEASE_CYCLE	42	-0.267036	-2.05253	0.00196078	0.0276348	0.923
REACTOME_FCERI_MEDIATED_NF_KB_ACTIVATION	72	-0.20597	-2.05172	0	0.0275926	0.924
REACTOME_PEPTIDE_HORMONE_METABOLISM	45	-0.256302	-2.04771	0.00403226	0.027976	0.93
REACTOME_SIGNAL_AMPLIFICATION	26	-0.335558	-2.04665	0	0.0278868	0.93
REACTOME_POTASSIUM_CHANNELS	75	-0.199872	-2.04513	0.00581395	0.0278546	0.933
REACTOME_THROMBIN_SIGNALLING_THROUGH_PROTEINASE_ACTIVATED_RECEPTORS_PARS	24	-0.342361	-2.02287	0.0039604	0.0315821	0.952
REACTOME_EGFR_DOWNREGULATION	25	-0.337019	-2.02197	0.00795229	0.0314639	0.953
KEGG_VALINE_LEUCINE_AND_ISOLEUCINE_DEGRADATION	39	-0.277752	-2.02075	0.00383877	0.0313685	0.955
REACTOME_SIGNALING_BY_FGFR2_IN_DISEASE	28	-0.31475	-2.01979	0.00392157	0.0313167	0.957
REACTOME_PROTEIN_UBIQUITINATION	60	-0.225856	-2.01411	0.008	0.0321716	0.963
KEGG_EPITHELIAL_CELL_SIGNALING_IN_HELICOBACTER_PYLORI_INFECTION	55	-0.222131	-2.01253	0.00631579	0.0322915	0.965
REACTOME_SIGNALING_BY_EGFR	44	-0.257574	-2.01089	0.00204499	0.0324209	0.966
REACTOME_GABA_B_RECEPTOR_ACTIVATION	34	-0.290478	-2.0101	0.00588235	0.0323432	0.967
KEGG_PROTEASOME	40	-0.274498	-2.0083	0.00766283	0.0324717	0.967
PID_NEPHRIN_NEPH1_PATHWAY	27	-0.322007	-2.00314	0.00389105	0.0332288	0.968
REACTOME_METABOLISM_OF_POLYAMINES	54	-0.230584	-2.00256	0.00189753	0.0330755	0.968
REACTOME_MITOCHONDRIAL_PROTEIN_IMPORT	58	-0.228669	-1.98899	0.00399202	0.0352734	0.973
PID_TRKR_PATHWAY	56	-0.229678	-1.98789	0.0094697	0.0351967	0.973
KEGG_NEUROACTIVE_LIGAND_RECEPTOR_INTERACTION	105	-0.170746	-1.98786	0.0114068	0.0349337	0.973
KEGG_BIOSYNTHESIS_OF_UNSATURATED_FATTY_ACIDS	17	-0.398451	-1.98151	0.0110092	0.0359785	0.976
REACTOME_LEISHMANIA_INFECTION	148	-0.141009	-1.98039	0.002	0.0358879	0.976
REACTOME_DECTIN_1_MEDIATED_NONCANONICAL_NF_KB_SIGNALING	55	-0.226883	-1.97435	0.00819672	0.0369914	0.979
REACTOME_CELL_SURFACE_INTERACTIONS_AT_THE_VASCULAR_WALL	86	-0.18149	-1.97412	0.00194932	0.0367983	0.979
REACTOME_GLYOXYLATE_METABOLISM_AND_GLYCINE_DEGRADATION	21	-0.351309	-1.96795	0.00391389	0.0378179	0.979
REACTOME_REGULATION_OF_RUNX3_EXPRESSION_AND_ACTIVITY	53	-0.227882	-1.95654	0.0116959	0.0402245	0.986
REACTOME_MUSCLE_CONTRACTION	140	-0.14097	-1.9541	0	0.0403583	0.987
REACTOME_MRNA_CAPPING	27	-0.316536	-1.95078	0.00396825	0.0407124	0.987
PID_ERBB2_ERBB3_PATHWAY	41	-0.258253	-1.92444	0.0101833	0.0469588	0.992
REACTOME_SYNTHESIS_OF_PIPS_AT_THE_EARLY_ENDOSOME_MEMBRANE	16	-0.410051	-1.92094	0.00838574	0.0474789	0.992
REACTOME_RAB_REGULATION_OF_TRAFFICKING	111	-0.156736	-1.91456	0.00954198	0.0489098	0.993
REACTOME_G_ALPHA_I_SIGNALLING_EVENTS	202	-0.118518	-1.91204	0.010352	0.0493792	0.995
REACTOME_TRAFFICKING_OF_GLUR2_CONTAINING_AMPA_RECEPTORS	17	-0.382802	-1.90557	0.00772201	0.0507439	0.996
BIOCARTA_NFAT_PATHWAY	40	-0.257571	-1.90228	0.00610998	0.0513588	0.996
REACTOME_GAP_JUNCTION_ASSEMBLY	16	-0.385734	-1.90149	0.00619835	0.0512396	0.996
REACTOME_TRANSPORT_OF_BILE_SALTS_AND_ORGANIC_ACIDS_METAL_IONS_AND_AMINE_COMPOUNDS	47	-0.238941	-1.89892	0.014433	0.0516214	0.996
REACTOME_STABILIZATION_OF_P53	51	-0.22849	-1.89851	0.00842105	0.0513278	0.996
REACTOME_SIGNALING_BY_FGFR1	36	-0.267646	-1.89058	0.0143149	0.0534539	0.997
BIOCARTA_FCER1_PATHWAY	36	-0.263902	-1.88954	0.0159363	0.0534766	0.998
REACTOME_G_BETA_GAMMA_SIGNALLING_THROUGH_CDC42	16	-0.39307	-1.88754	0.0118577	0.0537129	0.999
BIOCARTA_GPCR_PATHWAY	28	-0.303506	-1.88219	0.0121212	0.0549295	0.999
KEGG_SNARE_INTERACTIONS_IN_VESICULAR_TRANSPORT	31	-0.270758	-1.87852	0.00814664	0.0557155	0.999
REACTOME_SIGNALING_BY_THE_B_CELL_RECEPTOR_BCR	101	-0.157797	-1.87568	0.00829876	0.0565248	0.999
REACTOME_SCF_SKP2_MEDIATED_DEGRADATION_OF_P27_P21	55	-0.208626	-1.87451	0.0120968	0.0565377	0.999
REACTOME_MITOCHONDRIAL_FATTY_ACID_BETA_OXIDATION	31	-0.279346	-1.87333	0.0059761	0.0566079	0.999
REACTOME_SYNTHESIS_OF_ACTIVE_UBIQUITIN_ROLES_OF_E1_AND_E2_ENZYMES	28	-0.296902	-1.87271	0.00192678	0.056441	0.999
BIOCARTA_NOS1_PATHWAY	20	-0.3454	-1.87211	0.00594059	0.0562663	0.999
REACTOME_O_LINKED_GLYCOSYLATION	83	-0.176299	-1.8716	0.0101833	0.0560852	0.999
REACTOME_MITOCHONDRIAL_CALCIUM_ION_TRANSPORT	21	-0.333433	-1.87019	0.00380228	0.0561879	0.999
PID_UPA_UPAR_PATHWAY	30	-0.290505	-1.86418	0.0075188	0.0580379	0.999
REACTOME_FATTY_ACYL_COA_BIOSYNTHESIS	27	-0.303003	-1.85815	0.0116054	0.0596911	0.999
REACTOME_RUNX1_REGULATES_TRANSCRIPTION_OF_GENES_INVOLVED_IN_DIFFERENTIATION_OF_HSCS	63	-0.195862	-1.85676	0.00628931	0.059792	0.999
REACTOME_NEGATIVE_REGULATION_OF_THE_PI3K_AKT_NETWORK	79	-0.175042	-1.85645	0.0094162	0.059494	0.999
REACTOME_FCGAMMA_RECEPTOR_FCGR_DEPENDENT_PHAGOCYTOSIS	80	-0.174947	-1.85391	0.0153257	0.0599363	1
REACTOME_LYSOSOME_VESICLE_BIOGENESIS	30	-0.285912	-1.84979	0.0169492	0.0608902	1
REACTOME_SPHINGOLIPID_DE_NOVO_BIOSYNTHESIS	37	-0.26196	-1.84799	0.00384615	0.0610895	1
REACTOME_SIGNALING_BY_FGFR4	28	-0.291345	-1.84766	0.00621118	0.060768	1
REACTOME_AUF1_HNRNP_D0_BINDS_AND_DESTABILIZES_MRNA	50	-0.220207	-1.84665	0.0134615	0.0607053	1
REACTOME_DOWNSTREAM_SIGNALING_EVENTS_OF_B_CELL_RECEPTOR_BCR	76	-0.181756	-1.84387	0.00961539	0.061379	1
REACTOME_TIE2_SIGNALING	15	-0.396272	-1.84252	0.0185185	0.0614874	1
REACTOME_PYRUVATE_METABOLISM	26	-0.304941	-1.84069	0.0112994	0.0617139	1
REACTOME_REGULATION_OF_RUNX2_EXPRESSION_AND_ACTIVITY	65	-0.193341	-1.84032	0.0117647	0.0614497	1
REACTOME_SIGNALING_BY_WNT	231	-0.104951	-1.83652	0.00619835	0.0624154	1
PID_S1P_META_PATHWAY	18	-0.362625	-1.83531	0.0137795	0.0625251	1
REACTOME_PHOSPHORYLATION_SITE_MUTANTS_OF_CTNNB1_ARE_NOT_TARGETED_TO_THE_PROTEASOME_BY_THE_DESTRUCTION_COMPLEX	15	-0.381006	-1.83218	0.0119284	0.0632164	1
REACTOME_GAMMA_CARBOXYLATION_HYPUSINE_FORMATION_AND_ARYLSULFATASE_ACTIVATION	26	-0.306766	-1.83176	0.0141129	0.0629997	1
BIOCARTA_MET_PATHWAY	32	-0.276211	-1.82886	0.0108225	0.0636992	1
REACTOME_SIGNALING_BY_ERBB4	53	-0.211338	-1.82782	0.014553	0.0636382	1
REACTOME_HIV_TRANSCRIPTION_INITIATION	44	-0.228584	-1.82557	0.00604839	0.0640176	1
REACTOME_PEROXISOMAL_LIPID_METABOLISM	23	-0.31752	-1.82423	0.00389864	0.0641675	1
REACTOME_SIGNALING_BY_FGFR2_IIIA_TM	18	-0.349892	-1.82304	0.0126582	0.0641886	1
REACTOME_INTRAFLAGELLAR_TRANSPORT	47	-0.224997	-1.82282	0.0190476	0.0639042	1
REACTOME_TRANSLOCATION_OF_SLC2A4_GLUT4_TO_THE_PLASMA_MEMBRANE	60	-0.202594	-1.82219	0.0184049	0.0637843	1
REACTOME_SIGNALING_BY_EGFR_IN_CANCER	20	-0.337267	-1.819	0.0181818	0.0645931	1
REACTOME_PINK_PARKIN_MEDIATED_MITOPHAGY	19	-0.346336	-1.81865	0.00782779	0.0643873	1
REACTOME_ADHERENS_JUNCTIONS_INTERACTIONS	29	-0.289282	-1.81835	0.0163934	0.0641001	1
REACTOME_PROGRAMMED_CELL_DEATH	149	-0.123457	-1.81752	0.021645	0.0640062	1
REACTOME_SYNTHESIS_OF_PIPS_AT_THE_PLASMA_MEMBRANE	50	-0.220438	-1.81529	0.0161616	0.0644936	1
REACTOME_MAPK_FAMILY_SIGNALING_CASCADES	238	-0.100069	-1.81095	0.0103093	0.0656489	1
REACTOME_ESR_MEDIATED_SIGNALING	140	-0.135435	-1.80975	0.020073	0.0657441	1
PID_PDGFRB_PATHWAY	125	-0.13995	-1.80781	0.0206186	0.0660652	1
REACTOME_INTERACTION_BETWEEN_L1_AND_ANKYRINS	26	-0.29806	-1.80536	0.0178926	0.0665168	1
REACTOME_MISCELLANEOUS_TRANSPORT_AND_BINDING_EVENTS	17	-0.35423	-1.79626	0.0184049	0.0696122	1
REACTOME_NEGATIVE_REGULATION_OF_FGFR4_SIGNALING	18	-0.350732	-1.79022	0.0121704	0.0714169	1
REACTOME_CARGO_CONCENTRATION_IN_THE_ER	26	-0.290509	-1.78295	0.0233463	0.0739099	1
REACTOME_SIGNALING_BY_HEDGEHOG	134	-0.13324	-1.78289	0.0264151	0.0735504	1
REACTOME_METAL_ION_SLC_TRANSPORTERS	20	-0.335977	-1.78061	0.0157171	0.0740778	1
KEGG_CARDIAC_MUSCLE_CONTRACTION	50	-0.216281	-1.77982	0.0213592	0.0740295	1
REACTOME_C_TYPE_LECTIN_RECEPTORS_CLRS	111	-0.143308	-1.77863	0.0211538	0.0741165	1
KEGG_RNA_POLYMERASE	26	-0.293821	-1.77861	0.0214844	0.0737441	1
KEGG_ENDOCYTOSIS	159	-0.122238	-1.77849	0.0142857	0.0734136	1
REACTOME_INTERLEUKIN_12_SIGNALING	36	-0.2424	-1.77245	0.0277778	0.0757629	1
KEGG_NICOTINATE_AND_NICOTINAMIDE_METABOLISM	17	-0.356504	-1.76801	0.0272374	0.0771765	1
REACTOME_GENE_AND_PROTEIN_EXPRESSION_BY_JAK_STAT_SIGNALING_AFTER_INTERLEUKIN_12_STIMULATION	31	-0.268288	-1.76211	0.0139442	0.079313	1
REACTOME_SYNTHESIS_OF_VERY_LONG_CHAIN_FATTY_ACYL_COAS	20	-0.336228	-1.75995	0.0201613	0.079745	1
REACTOME_RAF_ACTIVATION	30	-0.274216	-1.75915	0.00626305	0.0796646	1
REACTOME_FORMATION_OF_FIBRIN_CLOT_CLOTTING_CASCADE	17	-0.353803	-1.75902	0.0224299	0.0793517	1
REACTOME_CARGO_RECOGNITION_FOR_CLATHRIN_MEDIATED_ENDOCYTOSIS	83	-0.166373	-1.75856	0.0159046	0.0791461	1
REACTOME_NEGATIVE_REGULATION_OF_FGFR1_SIGNALING	20	-0.334092	-1.7553	0.029703	0.0800977	1
REACTOME_TRANSPORT_OF_INORGANIC_CATIONS_ANIONS_AND_AMINO_ACIDS_OLIGOPEPTIDES	74	-0.171851	-1.75134	0.0159681	0.0814747	1
REACTOME_GLUCAGON_TYPE_LIGAND_RECEPTORS	17	-0.352607	-1.75059	0.0215686	0.0813647	1
REACTOME_HIV_INFECTION	202	-0.105515	-1.7493	0.0266393	0.0814764	1
REACTOME_ASYMMETRIC_LOCALIZATION_OF_PCP_PROTEINS	60	-0.188812	-1.74888	0.0175781	0.0812245	1
REACTOME_FGFR2_MUTANT_RECEPTOR_ACTIVATION	18	-0.349892	-1.74612	0.0255906	0.0819754	1
REACTOME_ADP_SIGNALLING_THROUGH_P2Y_PURINOCEPTOR_1	20	-0.325567	-1.74541	0.0262626	0.0818529	1
REACTOME_GOLGI_ASSOCIATED_VESICLE_BIOGENESIS	52	-0.206586	-1.74484	0.0181818	0.0816894	1
KEGG_PROPANOATE_METABOLISM	27	-0.276231	-1.73987	0.0308642	0.0836098	1
KEGG_PEROXISOME	68	-0.180028	-1.7392	0.031185	0.0834806	1
REACTOME_HEDGEHOG_ON_STATE	77	-0.167138	-1.7318	0.0268041	0.086499	1
BIOCARTA_PTEN_PATHWAY	16	-0.36571	-1.73146	0.0173745	0.0862671	1
REACTOME_COSTIMULATION_BY_THE_CD28_FAMILY	44	-0.217136	-1.72711	0.037182	0.0877157	1
PID_S1P_S1P2_PATHWAY	23	-0.300305	-1.72285	0.0162933	0.0890922	1
REACTOME_SEMA3A_PAK_DEPENDENT_AXON_REPULSION	16	-0.355626	-1.71982	0.0174757	0.0900353	1
PID_ER_NONGENOMIC_PATHWAY	38	-0.22836	-1.7193	0.0180361	0.0899111	1
REACTOME_INTRA_GOLGI_TRAFFIC	39	-0.234447	-1.71912	0.0253411	0.0896111	1
PID_AR_NONGENOMIC_PATHWAY	30	-0.266043	-1.71864	0.019802	0.0894392	1
BIOCARTA_SPRY_PATHWAY	17	-0.346528	-1.71756	0.0251572	0.0894784	1
PID_AJDISS_2PATHWAY	42	-0.225585	-1.71737	0.031746	0.0892121	1
PID_INTEGRIN_A4B1_PATHWAY	30	-0.267021	-1.71124	0.0422535	0.091703	1
REACTOME_GLYCOSPHINGOLIPID_METABOLISM	36	-0.247806	-1.71052	0.0268595	0.0916053	1
NABA_MATRISOME_ASSOCIATED	328	-0.0836498	-1.71041	0.0229008	0.0912782	1
KEGG_UBIQUITIN_MEDIATED_PROTEOLYSIS	122	-0.134121	-1.7104	0.0292887	0.0908888	1
REACTOME_HEDGEHOG_OFF_STATE	102	-0.142183	-1.7072	0.0434783	0.0920242	1
REACTOME_MITOPHAGY	26	-0.283643	-1.7071	0.0357853	0.0916672	1
BIOCARTA_LIS1_PATHWAY	18	-0.335705	-1.7024	0.0273973	0.0933428	1
BIOCARTA_CHREBP_PATHWAY	15	-0.361384	-1.7019	0.0234834	0.0931875	1
REACTOME_AMINO_ACIDS_REGULATE_MTORC1	46	-0.213185	-1.69909	0.0226337	0.0941844	1
BIOCARTA_TCR_PATHWAY	36	-0.237997	-1.6906	0.0325866	0.0981961	1
REACTOME_ION_CHANNEL_TRANSPORT	123	-0.129938	-1.69058	0.0237624	0.09781	1
BIOCARTA_CREB_PATHWAY	21	-0.304887	-1.6895	0.0321285	0.0978947	1
REACTOME_BUDDING_AND_MATURATION_OF_HIV_VIRION	26	-0.279205	-1.68309	0.027668	0.100721	1
REACTOME_RETROGRADE_TRANSPORT_AT_THE_TRANS_GOLGI_NETWORK	47	-0.207491	-1.68239	0.0391791	0.100693	1
REACTOME_G_ALPHA_Q_SIGNALLING_EVENTS	116	-0.133272	-1.6739	0.030888	0.104363	1
REACTOME_GPVI_MEDIATED_ACTIVATION_CASCADE	30	-0.255193	-1.67384	0.0186335	0.103959	1
REACTOME_ASSEMBLY_AND_CELL_SURFACE_PRESENTATION_OF_NMDA_RECEPTORS	34	-0.24238	-1.67382	0.0238095	0.103543	1
KEGG_BUTANOATE_METABOLISM	25	-0.280832	-1.67192	0.0368932	0.104131	1
REACTOME_CELL_CELL_JUNCTION_ORGANIZATION	43	-0.213961	-1.67102	0.0389105	0.104111	1
REACTOME_INTERLEUKIN_12_FAMILY_SIGNALING	41	-0.224142	-1.66807	0.03	0.105249	1
REACTOME_PCP_CE_PATHWAY	84	-0.153685	-1.66758	0.0338346	0.10507	1
KEGG_PROTEIN_EXPORT	21	-0.303191	-1.66549	0.0275591	0.105882	1
PID_NCADHERIN_PATHWAY	32	-0.246683	-1.66345	0.03125	0.106599	1
REACTOME_SIALIC_ACID_METABOLISM	28	-0.265434	-1.66324	0.0311203	0.106316	1
REACTOME_SPRY_REGULATION_OF_FGF_SIGNALING	15	-0.350653	-1.66049	0.0272374	0.107271	1
PID_LIS1_PATHWAY	27	-0.26672	-1.65749	0.0337302	0.108428	1
PID_CXCR3_PATHWAY	39	-0.220906	-1.65614	0.0258449	0.108702	1
REACTOME_CD28_CO_STIMULATION	30	-0.256069	-1.65099	0.030888	0.111128	1
REACTOME_APC_C_CDH1_MEDIATED_DEGRADATION_OF_CDC20_AND_OTHER_APC_C_CDH1_TARGETED_PROTEINS_IN_LATE_MITOSIS_EARLY_G1	68	-0.169658	-1.6509	0.0218688	0.110729	1
REACTOME_NEGATIVE_REGULATION_OF_FGFR2_SIGNALING	19	-0.31562	-1.64849	0.0527383	0.111459	1
REACTOME_BIOSYNTHESIS_OF_THE_N_GLYCAN_PRECURSOR_DOLICHOL_LIPID_LINKED_OLIGOSACCHARIDE_LLO_AND_TRANSFER_TO_A_NASCENT_PROTEIN	70	-0.164567	-1.64793	0.0363636	0.111395	1
REACTOME_SIGNALING_BY_FGFR3	30	-0.250822	-1.64332	0.0316832	0.113557	1
REACTOME_NEGATIVE_REGULATION_OF_MET_ACTIVITY	19	-0.321587	-1.6413	0.030426	0.114148	1
PID_ENDOTHELIN_PATHWAY	57	-0.181638	-1.63885	0.0472441	0.11501	1
REACTOME_DETOXIFICATION_OF_REACTIVE_OXYGEN_SPECIES	30	-0.253614	-1.63574	0.0336134	0.116306	1
REACTOME_NEGATIVE_REGULATION_OF_FGFR3_SIGNALING	19	-0.31562	-1.63397	0.0423077	0.11675	1
REACTOME_SIGNALING_BY_MET	71	-0.159911	-1.63187	0.0434783	0.117429	1
REACTOME_TRAFFICKING_OF_AMPA_RECEPTORS	30	-0.248068	-1.62939	0.0472441	0.118374	1
KEGG_COMPLEMENT_AND_COAGULATION_CASCADES	30	-0.253851	-1.62824	0.0474227	0.118542	1
KEGG_N_GLYCAN_BIOSYNTHESIS	44	-0.210032	-1.62742	0.0409836	0.118507	1
REACTOME_RHO_GTPASES_ACTIVATE_WASPS_AND_WAVES	36	-0.227291	-1.62561	0.0452756	0.119071	1
BIOCARTA_NDKDYNAMIN_PATHWAY	16	-0.336098	-1.624	0.0424242	0.119505	1
REACTOME_SIGNALING_BY_NOTCH4	78	-0.161155	-1.62304	0.0390335	0.119607	1
REACTOME_RNA_POLYMERASE_III_CHAIN_ELONGATION	17	-0.315036	-1.61835	0.0276596	0.121883	1
KEGG_ALANINE_ASPARTATE_AND_GLUTAMATE_METABOLISM	22	-0.29343	-1.61726	0.0323232	0.122091	1
REACTOME_ANTI_INFLAMMATORY_RESPONSE_FAVOURING_LEISHMANIA_PARASITE_INFECTION	73	-0.160559	-1.61298	0.0372549	0.124229	1
PID_EPHB_FWD_PATHWAY	38	-0.220766	-1.61268	0.0257937	0.123988	1
REACTOME_GLYCOGEN_METABOLISM	22	-0.286902	-1.6115	0.0377734	0.124162	1
PID_P75_NTR_PATHWAY	56	-0.182358	-1.61118	0.0471513	0.123902	1
REACTOME_INSULIN_PROCESSING	22	-0.288194	-1.60836	0.0494297	0.125248	1
REACTOME_NUCLEOBASE_CATABOLISM	23	-0.283158	-1.60508	0.0535373	0.126768	1
REACTOME_E3_UBIQUITIN_LIGASES_UBIQUITINATE_TARGET_PROTEINS	40	-0.211254	-1.60469	0.0289855	0.126562	1
REACTOME_FORMATION_OF_TC_NER_PRE_INCISION_COMPLEX	50	-0.188304	-1.59636	0.0488798	0.131206	1
REACTOME_G_ALPHA_Z_SIGNALLING_EVENTS	39	-0.221874	-1.59615	0.049904	0.130892	1
PID_THROMBIN_PAR1_PATHWAY	39	-0.213186	-1.59373	0.0457143	0.131843	1
REACTOME_AGGREPHAGY	32	-0.237925	-1.59209	0.0482897	0.132353	1
REACTOME_ION_HOMEOSTASIS	44	-0.204205	-1.58936	0.0554455	0.133574	1
REACTOME_BETA_CATENIN_PHOSPHORYLATION_CASCADE	17	-0.311922	-1.58641	0.0578512	0.135103	1
REACTOME_SIGNALING_BY_PDGFR_IN_DISEASE	20	-0.300595	-1.58582	0.0553191	0.135047	1
PID_S1P_S1P3_PATHWAY	28	-0.247512	-1.58512	0.0477178	0.134999	1
REACTOME_METABOLISM_OF_NITRIC_OXIDE_ENOS_ACTIVATION_AND_REGULATION	15	-0.348535	-1.5843	0.0458167	0.135026	1
REACTOME_SLC_MEDIATED_TRANSMEMBRANE_TRANSPORT	158	-0.105532	-1.57982	0.0453649	0.137356	1
REACTOME_SIGNALING_BY_NTRK2_TRKB	23	-0.278361	-1.57741	0.050813	0.13843	1
REACTOME_TCR_SIGNALING	89	-0.143237	-1.57346	0.0512334	0.140488	1
REACTOME_ANTIGEN_PROCESSING_CROSS_PRESENTATION	83	-0.145741	-1.5708	0.0469388	0.141649	1
REACTOME_DOWNSTREAM_SIGNALING_OF_ACTIVATED_FGFR1	20	-0.29064	-1.57043	0.0623742	0.141433	1
REACTOME_GLUCAGON_LIKE_PEPTIDE_1_GLP1_REGULATES_INSULIN_SECRETION	33	-0.228988	-1.56992	0.0452756	0.141248	1
REACTOME_EPH_EPHRIN_SIGNALING	89	-0.143533	-1.56946	0.0383838	0.141035	1
KEGG_BASAL_TRANSCRIPTION_FACTORS	31	-0.230104	-1.56465	0.0515464	0.143853	1
REACTOME_TRIGLYCERIDE_METABOLISM	21	-0.282722	-1.56241	0.0492813	0.1448	1
BIOCARTA_NGF_PATHWAY	18	-0.307286	-1.56031	0.0607843	0.145783	1
REACTOME_UCH_PROTEINASES	81	-0.146443	-1.56029	0.0612648	0.145308	1
REACTOME_DISORDERS_OF_TRANSMEMBRANE_TRANSPORTERS	126	-0.119709	-1.55812	0.0643939	0.146295	1
REACTOME_BETA_CATENIN_INDEPENDENT_WNT_SIGNALING	130	-0.117373	-1.55198	0.0398406	0.150048	1
REACTOME_NITRIC_OXIDE_STIMULATES_GUANYLATE_CYCLASE	16	-0.318	-1.54933	0.0618763	0.151328	1
KEGG_GLYCOSAMINOGLYCAN_DEGRADATION	16	-0.325995	-1.54751	0.057971	0.152089	1
KEGG_GLUTATHIONE_METABOLISM	36	-0.21947	-1.54524	0.06639	0.153228	1
REACTOME_CARBOXYTERMINAL_POST_TRANSLATIONAL_MODIFICATIONS_OF_TUBULIN	28	-0.240346	-1.54093	0.0711297	0.155739	1
BIOCARTA_GSK3_PATHWAY	19	-0.293276	-1.53954	0.068323	0.156222	1
REACTOME_PEROXISOMAL_PROTEIN_IMPORT	50	-0.184998	-1.53895	0.0651341	0.156068	1
KEGG_REGULATION_OF_ACTIN_CYTOSKELETON	174	-0.100708	-1.53611	0.0681818	0.157672	1
REACTOME_AQUAPORIN_MEDIATED_TRANSPORT	34	-0.223705	-1.53605	0.0694981	0.157223	1
KEGG_PYRIMIDINE_METABOLISM	81	-0.148173	-1.53517	0.0609037	0.157341	1
REACTOME_ACTIVATION_OF_AMPK_DOWNSTREAM_OF_NMDARS	20	-0.282189	-1.53449	0.0715746	0.157323	1
KEGG_FATTY_ACID_METABOLISM	33	-0.22568	-1.53432	0.0492505	0.156922	1
REACTOME_BIOLOGICAL_OXIDATIONS	95	-0.131804	-1.53386	0.0389864	0.156755	1
REACTOME_VASOPRESSIN_REGULATES_RENAL_WATER_HOMEOSTASIS_VIA_AQUAPORINS	33	-0.223648	-1.53156	0.0665323	0.157894	1
REACTOME_INTERLEUKIN_1_SIGNALING	90	-0.13692	-1.52819	0.0675422	0.159943	1
BIOCARTA_IGF1R_PATHWAY	22	-0.268052	-1.52804	0.0633663	0.159533	1
REACTOME_ORC1_REMOVAL_FROM_CHROMATIN	65	-0.162422	-1.52803	0.0484496	0.159057	1
REACTOME_PARASITE_INFECTION	55	-0.172337	-1.52369	0.0607211	0.161723	1
REACTOME_CELL_CELL_COMMUNICATION	91	-0.138016	-1.52135	0.077821	0.163052	1
REACTOME_CELL_JUNCTION_ORGANIZATION	64	-0.162817	-1.52034	0.0438247	0.163223	1
REACTOME_SIGNALING_BY_NTRK3_TRKC	16	-0.315014	-1.51867	0.062753	0.163978	1
KEGG_PENTOSE_PHOSPHATE_PATHWAY	17	-0.302382	-1.51694	0.0646388	0.164756	1
REACTOME_CA_DEPENDENT_EVENTS	36	-0.217915	-1.51597	0.0630975	0.164949	1
PID_AMB2_NEUTROPHILS_PATHWAY	29	-0.230293	-1.51513	0.0847458	0.165042	1
REACTOME_PHASE_II_CONJUGATION_OF_COMPOUNDS	53	-0.173842	-1.5128	0.0609756	0.166299	1
REACTOME_GLUTATHIONE_CONJUGATION	25	-0.24712	-1.51259	0.0558882	0.165926	1
REACTOME_GASTRIN_CREB_SIGNALLING_PATHWAY_VIA_PKC_AND_MAPK	15	-0.322129	-1.51111	0.0587045	0.166446	1
REACTOME_CALNEXIN_CALRETICULIN_CYCLE	24	-0.258871	-1.50988	0.0702811	0.166944	1
KEGG_OLFACTORY_TRANSDUCTION	17	-0.302967	-1.50911	0.0606061	0.16695	1
REACTOME_O_GLYCOSYLATION_OF_TSR_DOMAIN_CONTAINING_PROTEINS	33	-0.219625	-1.50911	0.0739958	0.166448	1
BIOCARTA_INSULIN_PATHWAY	20	-0.29064	-1.50895	0.0704501	0.166049	1
REACTOME_CLEC7A_DECTIN_1_SIGNALING	91	-0.136813	-1.50586	0.0753564	0.168161	1
PID_CDC42_PATHWAY	67	-0.157042	-1.5042	0.0704846	0.168861	1
REACTOME_NEGATIVE_REGULATION_OF_MAPK_PATHWAY	38	-0.210294	-1.50238	0.0730689	0.16986	1
REACTOME_UPTAKE_AND_ACTIONS_OF_BACTERIAL_TOXINS	27	-0.240683	-1.4953	0.08	0.174641	1
REACTOME_DISEASES_OF_CARBOHYDRATE_METABOLISM	26	-0.244349	-1.49093	0.0811881	0.177631	1
REACTOME_SIGNALLING_TO_ERKS	31	-0.221364	-1.48925	0.0721248	0.178401	1
REACTOME_G_PROTEIN_MEDIATED_EVENTS	51	-0.173873	-1.48385	0.0741483	0.182265	1
REACTOME_VEGFR2_MEDIATED_VASCULAR_PERMEABILITY	27	-0.244884	-1.48331	0.0675105	0.182157	1
KEGG_O_GLYCAN_BIOSYNTHESIS	23	-0.261022	-1.4821	0.0989474	0.182546	1
REACTOME_CONSTITUTIVE_SIGNALING_BY_LIGAND_RESPONSIVE_EGFR_CANCER_VARIANTS	18	-0.292712	-1.48177	0.0664137	0.182234	1
REACTOME_O_LINKED_GLYCOSYLATION_OF_MUCINS	41	-0.195303	-1.47851	0.0637066	0.184203	1
REACTOME_GABA_SYNTHESIS_RELEASE_REUPTAKE_AND_DEGRADATION	17	-0.297724	-1.47827	0.0797665	0.183843	1
REACTOME_ER_QUALITY_CONTROL_COMPARTMENT_ERQC	19	-0.276343	-1.47764	0.0804124	0.183857	1
REACTOME_SIGNALING_BY_NOTCH	165	-0.0978363	-1.47738	0.0668016	0.18353	1
PID_FAK_PATHWAY	56	-0.169038	-1.47574	0.07	0.184311	1
REACTOME_DOWNSTREAM_SIGNAL_TRANSDUCTION	28	-0.230057	-1.47424	0.0977131	0.185093	1
PID_CXCR4_PATHWAY	89	-0.132246	-1.47281	0.0643382	0.185625	1
REACTOME_INTRACELLULAR_SIGNALING_BY_SECOND_MESSENGERS	261	-0.0786518	-1.47207	0.0847108	0.185725	1
REACTOME_AMYLOID_FIBER_FORMATION	32	-0.219141	-1.47094	0.09375	0.186093	1
BIOCARTA_BARRESTIN_SRC_PATHWAY	17	-0.298613	-1.46759	0.0944123	0.188278	1
REACTOME_THROMBOXANE_SIGNALLING_THROUGH_TP_RECEPTOR	18	-0.286577	-1.46661	0.0816733	0.188578	1
KEGG_STARCH_AND_SUCROSE_METABOLISM	20	-0.266184	-1.46386	0.073501	0.190452	1
KEGG_CALCIUM_SIGNALING_PATHWAY	122	-0.114547	-1.46239	0.0927419	0.191088	1
PID_ERBB1_RECEPTOR_PROXIMAL_PATHWAY	35	-0.207832	-1.46182	0.0858283	0.191017	1
PID_ANGIOPOIETIN_RECEPTOR_PATHWAY	41	-0.19227	-1.4606	0.0957031	0.191485	1
REACTOME_VEGFR2_MEDIATED_CELL_PROLIFERATION	19	-0.280413	-1.45855	0.084	0.192616	1
REACTOME_MTORC1_MEDIATED_SIGNALLING	23	-0.256651	-1.45833	0.0761523	0.192286	1
REACTOME_PRESYNAPTIC_FUNCTION_OF_KAINATE_RECEPTORS	17	-0.293709	-1.4554	0.0746562	0.194262	1
PID_PDGFRA_PATHWAY	20	-0.267149	-1.45427	0.0831683	0.194737	1
REACTOME_TRANSCRIPTIONAL_REGULATION_BY_RUNX2	102	-0.120696	-1.45379	0.0800781	0.194552	1
BIOCARTA_PAR1_PATHWAY	17	-0.289394	-1.44938	0.0742188	0.197742	1
REACTOME_REGULATION_OF_SIGNALING_BY_CBL	21	-0.265071	-1.44922	0.104536	0.197335	1
REACTOME_ADORA2B_MEDIATED_ANTI_INFLAMMATORY_CYTOKINES_PRODUCTION	50	-0.17453	-1.44868	0.0892495	0.197201	1
REACTOME_SIGNALING_BY_VEGF	101	-0.123195	-1.4449	0.0888889	0.199985	1
REACTOME_ACTIVATION_OF_MATRIX_METALLOPROTEINASES	17	-0.29191	-1.44396	0.103586	0.200348	1
KEGG_PHOSPHATIDYLINOSITOL_SIGNALING_SYSTEM	70	-0.148135	-1.44327	0.0851927	0.200367	1
KEGG_CELL_ADHESION_MOLECULES_CAMS	72	-0.146793	-1.44253	0.0961538	0.200421	1
REACTOME_ASSOCIATION_OF_TRIC_CCT_WITH_TARGET_PROTEINS_DURING_BIOSYNTHESIS	35	-0.207757	-1.44081	0.0938776	0.201217	1
REACTOME_SIGNALING_BY_ERBB2_ECD_MUTANTS	16	-0.299622	-1.44055	0.0916335	0.20096	1
BIOCARTA_IGF1_PATHWAY	21	-0.259661	-1.43937	0.0826613	0.201467	1
REACTOME_RHO_GTPASES_ACTIVATE_ROCKS	19	-0.27889	-1.43685	0.093254	0.203095	1
KEGG_OTHER_GLYCAN_DEGRADATION	15	-0.307406	-1.43498	0.11811	0.204222	1
REACTOME_N_GLYCAN_TRIMMING_IN_THE_ER_AND_CALNEXIN_CALRETICULIN_CYCLE	33	-0.213795	-1.43189	0.102362	0.206329	1
PID_ERBB1_INTERNALIZATION_PATHWAY	39	-0.19611	-1.43028	0.10325	0.207154	1
REACTOME_DOWNSTREAM_SIGNALING_OF_ACTIVATED_FGFR4	15	-0.307217	-1.42964	0.101833	0.20721	1
BIOCARTA_PYK2_PATHWAY	27	-0.233269	-1.42953	0.0835073	0.206738	1
REACTOME_GPCR_LIGAND_BINDING	149	-0.101508	-1.42608	0.0912951	0.209053	1
REACTOME_ROS_AND_RNS_PRODUCTION_IN_PHAGOCYTES	28	-0.226764	-1.42402	0.107505	0.210329	1
BIOCARTA_IGF1MTOR_PATHWAY	18	-0.280345	-1.42344	0.112595	0.210252	1
BIOCARTA_GLEEVEC_PATHWAY	23	-0.24933	-1.41673	0.110899	0.215698	1
KEGG_FOCAL_ADHESION	176	-0.0909563	-1.41607	0.0890688	0.215671	1
REACTOME_RECYCLING_PATHWAY_OF_L1	39	-0.196442	-1.41179	0.0945674	0.218774	1
REACTOME_G1_S_DNA_DAMAGE_CHECKPOINTS	60	-0.156754	-1.4108	0.110442	0.219173	1
REACTOME_SYNTHESIS_OF_SUBSTRATES_IN_N_GLYCAN_BIOSYTHESIS	56	-0.160808	-1.4086	0.105263	0.220699	1
KEGG_GLYCOLYSIS_GLUCONEOGENESIS	37	-0.19957	-1.4074	0.10142	0.221267	1
PID_REELIN_PATHWAY	28	-0.224613	-1.40439	0.134387	0.223403	1
REACTOME_IRS_MEDIATED_SIGNALLING	30	-0.217414	-1.40018	0.115079	0.226668	1
BIOCARTA_BIOPEPTIDES_PATHWAY	26	-0.227647	-1.3983	0.10978	0.227885	1
REACTOME_RHO_GTPASES_ACTIVATE_CIT	19	-0.259985	-1.39788	0.0826772	0.227755	1
REACTOME_G_ALPHA_S_SIGNALLING_EVENTS	68	-0.144735	-1.39733	0.115888	0.22764	1
REACTOME_SIGNALING_BY_SCF_KIT	38	-0.193386	-1.39712	0.107843	0.227249	1
PID_MET_PATHWAY	75	-0.134292	-1.39333	0.101167	0.230235	1
BIOCARTA_MEF2D_PATHWAY	18	-0.275152	-1.39032	0.135294	0.232601	1
BIOCARTA_MCALPAIN_PATHWAY	15	-0.300997	-1.38997	0.0989899	0.232383	1
REACTOME_TRANSCRIPTION_OF_THE_HIV_GENOME	60	-0.151238	-1.38689	0.134766	0.234775	1
BIOCARTA_BCR_PATHWAY	30	-0.215618	-1.38574	0.0983936	0.235297	1
REACTOME_RHO_GTPASES_ACTIVATE_PAKS	21	-0.253453	-1.38319	0.125506	0.237073	1
REACTOME_CELLULAR_RESPONSE_TO_HYPOXIA	66	-0.14624	-1.38318	0.115632	0.236485	1
BIOCARTA_NO1_PATHWAY	23	-0.24651	-1.38277	0.109731	0.2363	1
PID_PS1_PATHWAY	40	-0.189478	-1.3815	0.11284	0.236864	1
PID_TGFBR_PATHWAY	52	-0.160244	-1.37058	0.116883	0.247238	1
PID_SYNDECAN_2_PATHWAY	30	-0.207677	-1.36969	0.137476	0.247541	1
REACTOME_CLASS_B_2_SECRETIN_FAMILY_RECEPTORS	43	-0.178264	-1.36915	0.114286	0.247491	1
REACTOME_SIGNALING_BY_FGFR_IN_DISEASE	47	-0.169766	-1.36749	0.125237	0.248475	1
REACTOME_INTEGRATION_OF_ENERGY_METABOLISM	89	-0.12168	-1.36666	0.112676	0.248639	1
REACTOME_MAPK6_MAPK4_SIGNALING	81	-0.128477	-1.36638	0.126923	0.248376	1
REACTOME_REGULATION_OF_PYRUVATE_DEHYDROGENASE_PDH_COMPLEX	15	-0.299556	-1.36578	0.125253	0.248366	1

## Sheet: cgp c2
Positively enriched in NEL-CRE
NAME	SIZE	ES	NES	NOM p-val	FDR q-val	FWER p-val
DUTERTRE_ESTRADIOL_RESPONSE_24HR_UP	294	0.357128	7.08318	0	0	0
GINESTIER_BREAST_CANCER_ZNF217_AMPLIFIED_DN	277	0.311383	5.97874	0	0	0
ROSTY_CERVICAL_CANCER_PROLIFERATION_CLUSTER	127	0.406009	5.3995	0	0	0
KOBAYASHI_EGFR_SIGNALING_24HR_DN	227	0.30876	5.38414	0	0	0
FLORIO_NEOCORTEX_BASAL_RADIAL_GLIA_DN	162	0.367995	5.35929	0	0	0
KONG_E2F3_TARGETS	89	0.461123	5.15271	0	0	0
SOTIRIOU_BREAST_CANCER_GRADE_1_VS_3_UP	136	0.373295	4.93072	0	0	0
CROONQUIST_IL6_DEPRIVATION_DN	90	0.42873	4.78453	0	0	0
PUJANA_BRCA2_PCC_NETWORK	367	0.21899	4.74571	0	0	0
TOYOTA_TARGETS_OF_MIR34B_AND_MIR34C	378	0.198322	4.44533	0	0	0
KANG_DOXORUBICIN_RESISTANCE_UP	49	0.536533	4.37944	0	0	0
GINESTIER_BREAST_CANCER_20Q13_AMPLIFICATION_DN	150	0.29808	4.24818	0	0	0
PUJANA_XPRSS_INT_NETWORK	154	0.289921	4.19474	0	0	0
LEE_EARLY_T_LYMPHOCYTE_UP	87	0.387655	4.19351	0	0	0
ZHOU_CELL_CYCLE_GENES_IN_IR_RESPONSE_24HR	114	0.325107	4.12941	0	0	0
BURTON_ADIPOGENESIS_3	84	0.383013	4.12822	0	0	0
FUJII_YBX1_TARGETS_DN	178	0.265108	4.07347	0	0	0
CROONQUIST_NRAS_SIGNALING_DN	67	0.42742	4.06421	0	0	0
FRASOR_RESPONSE_TO_SERM_OR_FULVESTRANT_DN	46	0.514917	4.04155	0	0	0
WHITEFORD_PEDIATRIC_CANCER_MARKERS	106	0.340915	4.03476	0	0	0
BLUM_RESPONSE_TO_SALIRASIB_DN	303	0.196499	3.93857	0	0	0
MORI_IMMATURE_B_LYMPHOCYTE_DN	83	0.368696	3.89514	0	0	0
FISCHER_G2_M_CELL_CYCLE	213	0.232762	3.87493	0	0	0
HOFFMANN_LARGE_TO_SMALL_PRE_BII_LYMPHOCYTE_UP	138	0.289564	3.86512	0	0	0
MARKEY_RB1_ACUTE_LOF_UP	207	0.232381	3.84505	0	0	0
LIAO_METASTASIS	442	0.160615	3.84024	0	0	0
GRAHAM_NORMAL_QUIESCENT_VS_NORMAL_DIVIDING_DN	78	0.372428	3.83814	0	0	0
MISSIAGLIA_REGULATED_BY_METHYLATION_DN	109	0.31588	3.81582	0	0	0
KAUFFMANN_DNA_REPAIR_GENES	206	0.225157	3.78619	0	0	0
PUJANA_BREAST_CANCER_WITH_BRCA1_MUTATED_UP	53	0.449096	3.78408	0	0	0
ZHOU_CELL_CYCLE_GENES_IN_IR_RESPONSE_6HR	79	0.358766	3.74486	0	0	0
GAVIN_FOXP3_TARGETS_CLUSTER_P6	79	0.362334	3.74111	0	0	0
ZHAN_MULTIPLE_MYELOMA_PR_UP	41	0.490799	3.64476	0	0	0
SARRIO_EPITHELIAL_MESENCHYMAL_TRANSITION_UP	161	0.247589	3.64142	0	0	0
MORI_PRE_BI_LYMPHOCYTE_UP	69	0.362579	3.57841	0	0	0
ODONNELL_TFRC_TARGETS_DN	105	0.289744	3.52325	0	0	0
MEISSNER_BRAIN_HCP_WITH_H3K27ME3	57	0.397864	3.50852	0	0	0
BASAKI_YBX1_TARGETS_UP	239	0.193454	3.46693	0	0	0
MORI_LARGE_PRE_BII_LYMPHOCYTE_UP	78	0.336499	3.4497	0	0	0
CHIANG_LIVER_CANCER_SUBCLASS_PROLIFERATION_UP	153	0.243117	3.42688	0	0	0
WHITFIELD_CELL_CYCLE_LITERATURE	43	0.437256	3.40482	0	0	0
PYEON_HPV_POSITIVE_TUMORS_UP	74	0.338428	3.39623	0	0	0
MANALO_HYPOXIA_DN	269	0.174539	3.34698	0	0	0
VECCHI_GASTRIC_CANCER_EARLY_UP	327	0.157606	3.34372	0	0	0
GRAHAM_CML_DIVIDING_VS_NORMAL_QUIESCENT_UP	154	0.235119	3.33508	0	0	0
FURUKAWA_DUSP6_TARGETS_PCI35_DN	62	0.362158	3.3269	0	0	0
PYEON_CANCER_HEAD_AND_NECK_VS_CERVICAL_UP	158	0.230087	3.32035	0	0	0
LINDGREN_BLADDER_CANCER_CLUSTER_1_DN	318	0.159814	3.28664	0	0	0
ISHIDA_E2F_TARGETS	49	0.39737	3.25047	0	0	0
SHEPARD_BMYB_MORPHOLINO_DN	157	0.222449	3.2246	0	0	0
NADERI_BREAST_CANCER_PROGNOSIS_UP	39	0.411211	3.12767	0	0	0
VILLANUEVA_LIVER_CANCER_KRT19_UP	139	0.224251	3.11011	0	1.41907e-05	0.001
EGUCHI_CELL_CYCLE_RB1_TARGETS	22	0.560102	3.11783	0	1.44636e-05	0.001
NAKAYAMA_SOFT_TISSUE_TUMORS_PCA2_UP	70	0.323917	3.0674	0	2.62904e-05	0.002
REN_BOUND_BY_E2F	53	0.358503	3.06812	0	2.67598e-05	0.002
SHEPARD_BMYB_TARGETS	65	0.325586	3.08153	0	2.72464e-05	0.002
PUJANA_BRCA_CENTERED_NETWORK	113	0.248671	3.08785	0	2.7751e-05	0.002
WHITFIELD_CELL_CYCLE_G2	144	0.21834	2.98994	0	7.7854e-05	0.006
BHAT_ESR1_TARGETS_VIA_AKT1_UP	234	0.166624	2.98006	0	0.000102009	0.008
SANSOM_APC_TARGETS_REQUIRE_MYC	189	0.186453	2.97002	0	0.000121195	0.01
LAIHO_COLORECTAL_CANCER_SERRATED_DN	71	0.300979	2.97247	0	0.000123181	0.01
MOLENAAR_TARGETS_OF_CCND1_AND_CDK4_DN	50	0.35682	2.9734	0	0.000125234	0.01
WU_APOPTOSIS_BY_CDKN1A_VIA_TP53	49	0.357357	2.94857	0	0.000130717	0.011
SENGUPTA_EBNA1_ANTICORRELATED	98	0.248439	2.90031	0	0.000138198	0.012
WHITFIELD_CELL_CYCLE_G1_S	112	0.236619	2.90146	0	0.000140357	0.012
REICHERT_MITOSIS_LIN9_TARGETS	27	0.458404	2.88805	0	0.000145232	0.013
FERREIRA_EWINGS_SARCOMA_UNSTABLE_VS_STABLE_UP	141	0.206749	2.894	0	0.000147433	0.013
FARMER_BREAST_CANCER_CLUSTER_2	31	0.424862	2.87949	0	0.000154726	0.014
PUJANA_BREAST_CANCER_LIT_INT_NETWORK	95	0.256269	2.86186	0	0.000171448	0.016
CUI_TCF21_TARGETS_2_UP	366	0.129588	2.86892	0	0.000173932	0.016
TANG_SENESCENCE_TP53_TARGETS_DN	45	0.354355	2.84225	0	0.000200532	0.018
CHEMNITZ_RESPONSE_TO_PROSTAGLANDIN_E2_UP	127	0.212476	2.80895	0	0.000250221	0.023
RICKMAN_TUMOR_DIFFERENTIATED_WELL_VS_POORLY_UP	197	0.1676	2.77024	0	0.000339551	0.032
RIZ_ERYTHROID_DIFFERENTIATION	70	0.279926	2.75228	0	0.000406188	0.039
KAMMINGA_EZH2_TARGETS	39	0.380803	2.736	0	0.000470562	0.046
LEE_DIFFERENTIATING_T_LYMPHOCYTE	143	0.199613	2.72624	0	0.000503775	0.05
BURTON_ADIPOGENESIS_PEAK_AT_24HR	38	0.371994	2.7097	0	0.000536012	0.054
SMIRNOV_RESPONSE_TO_IR_6HR_DN	87	0.246318	2.6935	0	0.000578209	0.059
SONG_TARGETS_OF_IE86_CMV_PROTEIN	49	0.326873	2.68113	0	0.000580115	0.06
ODONNELL_TARGETS_OF_MYC_AND_TFRC_DN	39	0.359581	2.66718	0	0.000619026	0.065
MUELLER_PLURINET	265	0.143957	2.66305	0	0.000639033	0.067
FEVR_CTNNB1_TARGETS_DN	483	0.106951	2.65879	0	0.000667815	0.071
WINNEPENNINCKX_MELANOMA_METASTASIS_UP	146	0.191254	2.65005	0	0.000696358	0.075
DUTERTRE_ESTRADIOL_RESPONSE_6HR_UP	200	0.162161	2.62828	0	0.000812168	0.086
FISCHER_G1_S_CELL_CYCLE	166	0.175113	2.61639	0	0.000917056	0.098
DASU_IL6_SIGNALING_UP	48	0.317935	2.58448	0	0.00109349	0.118
KAUFFMANN_DNA_REPLICATION_GENES	128	0.194696	2.58721	0	0.00110621	0.118
KAUFFMANN_MELANOMA_RELAPSE_UP	59	0.281559	2.57794	0	0.00111472	0.121
FINETTI_BREAST_CANCER_KINOME_RED	16	0.527631	2.5677	0	0.00122306	0.134
WANG_RESPONSE_TO_GSK3_INHIBITOR_SB216763_DN	314	0.125438	2.56798	0	0.00122842	0.133
WHITFIELD_CELL_CYCLE_G2_M	178	0.167157	2.55976	0	0.00125092	0.139
MARTENS_BOUND_BY_PML_RARA_FUSION	376	0.113839	2.55572	0	0.00127032	0.143
GARGALOVIC_RESPONSE_TO_OXIDIZED_PHOSPHOLIPIDS_GREEN_DN	21	0.460932	2.55174	0	0.00129626	0.147
SENGUPTA_NASOPHARYNGEAL_CARCINOMA_UP	254	0.137747	2.53828	0.00198807	0.00142614	0.163
MARZEC_IL2_SIGNALING_UP	93	0.221405	2.47977	0	0.0019282	0.22
AFFAR_YY1_TARGETS_DN	183	0.157742	2.4815	0	0.00194052	0.219
YU_MYC_TARGETS_UP	38	0.334819	2.47529	0	0.0019858	0.227
LI_WILMS_TUMOR_VS_FETAL_KIDNEY_1_DN	146	0.178504	2.47145	0	0.00201893	0.232
GARGALOVIC_RESPONSE_TO_OXIDIZED_PHOSPHOLIPIDS_TURQUOISE_DN	45	0.314568	2.46994	0	0.00202898	0.234
GARCIA_TARGETS_OF_FLI1_AND_DAX1_DN	133	0.187315	2.44924	0	0.00228588	0.261
LIN_APC_TARGETS	59	0.268475	2.44496	0	0.00233684	0.269
BHAT_ESR1_TARGETS_NOT_VIA_AKT1_UP	172	0.158903	2.44017	0	0.00237247	0.273
SCIAN_CELL_CYCLE_TARGETS_OF_TP53_AND_TP73_DN	21	0.445575	2.42907	0.00190476	0.00253668	0.293
GROSS_HYPOXIA_VIA_ELK3_UP	191	0.150285	2.42978	0	0.00253961	0.29
DAZARD_RESPONSE_TO_UV_NHEK_DN	261	0.128121	2.42062	0	0.00268336	0.309
RUIZ_TNC_TARGETS_DN	128	0.182282	2.40983	0	0.0029407	0.335
BERENJENO_TRANSFORMED_BY_RHOA_UP	489	0.0937387	2.40429	0	0.00307336	0.35
SHEDDEN_LUNG_CANCER_POOR_SURVIVAL_A6	395	0.105238	2.40134	0	0.00314908	0.362
LY_AGING_MIDDLE_DN	15	0.50929	2.39925	0	0.0031616	0.367
RIZ_ERYTHROID_DIFFERENTIATION_HBZ	25	0.400628	2.39697	0	0.00317359	0.371
QI_PLASMACYTOMA_UP	199	0.147483	2.39051	0	0.00323045	0.383
BROWNE_INTERFERON_RESPONSIVE_GENES	49	0.285404	2.39147	0	0.00325275	0.382
GOLDRATH_ANTIGEN_RESPONSE	284	0.122098	2.38557	0	0.00334263	0.39
SCHLOSSER_SERUM_RESPONSE_UP	98	0.203673	2.37302	0	0.00364272	0.411
VERNELL_RETINOBLASTOMA_PATHWAY_UP	66	0.247905	2.33966	0	0.00470062	0.506
JEON_SMAD6_TARGETS_DN	15	0.495499	2.3381	0	0.00471878	0.512
RASHI_RESPONSE_TO_IONIZING_RADIATION_3	38	0.323783	2.32853	0.00201207	0.00493769	0.532
WHITFIELD_CELL_CYCLE_S	120	0.181723	2.33021	0	0.00494183	0.53
RODRIGUES_NTN1_TARGETS_DN	117	0.183248	2.32719	0	0.00494657	0.535
CHIARETTI_ACUTE_LYMPHOBLASTIC_LEUKEMIA_ZAP70	50	0.279397	2.31927	0	0.00513647	0.554
MORI_EMU_MYC_LYMPHOMA_BY_ONSET_TIME_UP	101	0.201383	2.31985	0	0.0051607	0.554
SANSOM_APC_MYC_TARGETS	211	0.137914	2.31445	0.00203252	0.00525963	0.569
CHARAFE_BREAST_CANCER_LUMINAL_VS_BASAL_UP	299	0.115242	2.29167	0	0.00606994	0.635
PETROVA_PROX1_TARGETS_UP	22	0.405361	2.27533	0.00398406	0.00667478	0.673
PEREZ_TP63_TARGETS	259	0.124715	2.27399	0.00402414	0.00667506	0.676
RASHI_RESPONSE_TO_IONIZING_RADIATION_6	55	0.259591	2.25923	0	0.00728428	0.712
NIKOLSKY_BREAST_CANCER_8Q23_Q24_AMPLICON	107	0.185032	2.25014	0.00376648	0.00765659	0.738
SHEPARD_CRUSH_AND_BURN_MUTANT_DN	157	0.158021	2.23398	0	0.00852373	0.78
STEIN_ESRRA_TARGETS_RESPONSIVE_TO_ESTROGEN_DN	37	0.310604	2.22548	0.0020202	0.0090099	0.806
BURTON_ADIPOGENESIS_PEAK_AT_16HR	36	0.312033	2.22077	0	0.00922374	0.813
DELPUECH_FOXO3_TARGETS_DN	31	0.330406	2.20535	0	0.0100335	0.829
MITSIADES_RESPONSE_TO_APLIDIN_DN	224	0.127767	2.2009	0	0.0102412	0.843
DUAN_PRDM5_TARGETS	55	0.253373	2.19834	0.00205339	0.0103618	0.849
TENEDINI_MEGAKARYOCYTE_MARKERS	48	0.26997	2.19114	0.00199601	0.0106874	0.86
GAL_LEUKEMIC_STEM_CELL_DN	161	0.149571	2.18679	0	0.0108531	0.865
LY_AGING_PREMATURE_DN	25	0.359994	2.17564	0	0.0114684	0.879
LE_NEURONAL_DIFFERENTIATION_DN	17	0.435591	2.17056	0.00198413	0.0117178	0.887
HADDAD_B_LYMPHOCYTE_PROGENITOR	208	0.128713	2.16846	0	0.0117357	0.89
RIZ_ERYTHROID_DIFFERENTIATION_CCNE1	36	0.307844	2.16217	0.00410678	0.0119921	0.901
BONCI_TARGETS_OF_MIR15A_AND_MIR16_1	82	0.196679	2.16252	0.0019802	0.0120571	0.9
ALCALAY_AML_BY_NPM1_LOCALIZATION_DN	153	0.14848	2.14804	0.00784314	0.0131669	0.929
BERTUCCI_MEDULLARY_VS_DUCTAL_BREAST_CANCER_UP	157	0.146453	2.13731	0	0.0140146	0.934
MARTENS_TRETINOIN_RESPONSE_UP	354	0.098856	2.13567	0.00200401	0.014022	0.935
CHEN_ETV5_TARGETS_TESTIS	16	0.433659	2.12396	0	0.0150957	0.946
XU_HGF_TARGETS_INDUCED_BY_AKT1_48HR_DN	18	0.418688	2.1092	0	0.0164354	0.961
GROSS_HYPOXIA_VIA_ELK3_ONLY_DN	40	0.280539	2.10704	0.00393701	0.0165537	0.961
MARTIN_INTERACT_WITH_HDAC	37	0.286253	2.07394	0	0.0201688	0.978
MATZUK_MEIOTIC_AND_DNA_REPAIR	29	0.329137	2.07139	0.0019685	0.0204029	0.981
SANA_RESPONSE_TO_IFNG_UP	41	0.272445	2.06402	0.00203666	0.021346	0.982
SEKI_INFLAMMATORY_RESPONSE_LPS_UP	61	0.222116	2.0569	0.00582524	0.0219753	0.983
NAGASHIMA_NRG1_SIGNALING_UP	142	0.145756	2.05739	0.00199601	0.0220919	0.983
LY_AGING_OLD_DN	51	0.239873	2.05041	0.00763359	0.0225493	0.983
WANG_METASTASIS_OF_BREAST_CANCER_ESR1_UP	18	0.398955	2.04853	0.00196464	0.0226262	0.983
ANDERSEN_CHOLANGIOCARCINOMA_CLASS2	87	0.185789	2.05056	0.00851064	0.0226535	0.983
WELCSH_BRCA1_TARGETS_DN	129	0.155005	2.02353	0.00195312	0.0264312	0.992
PEDRIOLI_MIR31_TARGETS_UP	125	0.155471	2.01178	0.00190476	0.0280857	0.994
NUNODA_RESPONSE_TO_DASATINIB_IMATINIB_UP	29	0.312265	2.00484	0.00196078	0.0291335	0.997
HOEBEKE_LYMPHOID_STEM_CELL_UP	78	0.193812	2.00214	0.00211864	0.0292438	0.997
BENPORATH_ES_CORE_NINE_CORRELATED	86	0.18518	2.00319	0.00604839	0.0292529	0.997
ZHENG_IL22_SIGNALING_DN	26	0.318806	1.99779	0.00584795	0.0294697	0.998
SMID_BREAST_CANCER_LUMINAL_A_DN	16	0.413238	1.99837	0.00404858	0.0295223	0.998
QI_HYPOXIA_TARGETS_OF_HIF1A_AND_FOXA2	30	0.305474	1.99612	0.00819672	0.0295645	0.998
DOANE_RESPONSE_TO_ANDROGEN_DN	203	0.122638	1.99898	0.00197628	0.0295765	0.998
FAELT_B_CLL_WITH_VH3_21_UP	43	0.261311	1.99203	0.00414079	0.0299329	0.998
SMID_BREAST_CANCER_RELAPSE_IN_BRAIN_UP	24	0.333318	1.99266	0.00406504	0.0300332	0.998
HORIUCHI_WTAP_TARGETS_DN	284	0.104056	1.98257	0.00609756	0.0313887	0.998
EINAV_INTERFERON_SIGNATURE_IN_CANCER	23	0.35182	1.97333	0.00561798	0.0327934	0.999
LE_EGR2_TARGETS_UP	102	0.172262	1.97133	0.0060241	0.0329955	0.999
DER_IFN_GAMMA_RESPONSE_UP	56	0.227747	1.96995	0.00411523	0.033133	0.999
AMBROSINI_FLAVOPIRIDOL_TREATMENT_TP53	81	0.188176	1.96694	0.00803213	0.0334417	1
SHIN_B_CELL_LYMPHOMA_CLUSTER_7	24	0.335559	1.9659	0.00614754	0.0334481	1
LEIN_MIDBRAIN_MARKERS	71	0.198557	1.96468	0.0040568	0.0335227	1
LI_WILMS_TUMOR_ANAPLASTIC_UP	16	0.405243	1.94862	0.00613497	0.0365096	1
HOWLIN_CITED1_TARGETS_1_UP	25	0.327149	1.94062	0.00813008	0.0375267	1
KIM_GASTRIC_CANCER_CHEMOSENSITIVITY	68	0.203554	1.94256	0.0201613	0.037531	1
HAMAI_APOPTOSIS_VIA_TRAIL_DN	128	0.145349	1.93953	0.00996016	0.0375397	1
FARMER_BREAST_CANCER_CLUSTER_1	22	0.348836	1.94117	0.00790514	0.0376164	1
BROWNE_HCMV_INFECTION_18HR_DN	137	0.140432	1.93674	0.00614754	0.0379777	1
POOLA_INVASIVE_BREAST_CANCER_UP	180	0.122613	1.93582	0.00790514	0.0380084	1
MORI_SMALL_PRE_BII_LYMPHOCYTE_DN	67	0.201813	1.92629	0.00389105	0.0400217	1
ONO_FOXP3_TARGETS_DN	29	0.298417	1.91728	0.00756144	0.0419108	1
BENPORATH_PROLIFERATION	130	0.145357	1.91498	0.00782779	0.0421879	1
SU_TESTIS	52	0.222185	1.91171	0.00402414	0.0426673	1
GRESHOCK_CANCER_COPY_NUMBER_UP	269	0.103134	1.90769	0	0.0432292	1
RIZ_ERYTHROID_DIFFERENTIATION_APOBEC2	15	0.403898	1.90801	0.00792079	0.0433908	1
YAO_TEMPORAL_RESPONSE_TO_PROGESTERONE_CLUSTER_2	39	0.259546	1.90615	0.00603622	0.0434245	1
GAURNIER_PSMD4_TARGETS	24	0.323499	1.89782	0.00763359	0.0447923	1
WAKASUGI_HAVE_ZNF143_BINDING_SITES	51	0.226197	1.89815	0.00218341	0.0449393	1
BONOME_OVARIAN_CANCER_POOR_SURVIVAL_DN	18	0.367851	1.89871	0.0161943	0.0449917	1
LEE_TARGETS_OF_PTCH1_AND_SUFU_UP	44	0.242266	1.8951	0.00588235	0.0452861	1
FONTAINE_FOLLICULAR_THYROID_ADENOMA_UP	59	0.211404	1.88276	0.0199557	0.0480901	1
WIELAND_UP_BY_HBV_INFECTION	66	0.197138	1.8771	0.0194805	0.0484984	1
THILLAINADESAN_ZNF217_TARGETS_UP	36	0.26015	1.87744	0.0156863	0.0486443	1
HOLLERN_EMT_BREAST_TUMOR_DN	61	0.204971	1.87821	0.0101215	0.048695	1
KAMMINGA_SENESCENCE	35	0.27071	1.87871	0.0123203	0.0488199	1
DEBIASI_APOPTOSIS_BY_REOVIRUS_INFECTION_DN	251	0.102534	1.87447	0.00986193	0.0490575	1
SU_PANCREAS	20	0.350064	1.87328	0.00628931	0.0490784	1
RAY_TUMORIGENESIS_BY_ERBB2_CDC25A_UP	131	0.143559	1.86997	0.00826446	0.0498385	1
OKAWA_NEUROBLASTOMA_1P36_31_DELETION	18	0.367033	1.8646	0.00655022	0.051103	1
RHODES_UNDIFFERENTIATED_CANCER	61	0.20266	1.86228	0.00831601	0.0514512	1
SAKAI_CHRONIC_HEPATITIS_VS_LIVER_CANCER_DN	24	0.311236	1.85639	0.0180361	0.0529207	1
BILD_E2F3_ONCOGENIC_SIGNATURE	207	0.11022	1.85545	0.0178571	0.0529815	1
GRAESSMANN_RESPONSE_TO_MC_AND_SERUM_DEPRIVATION_UP	158	0.125514	1.84867	0.0166667	0.0547293	1
GREENBAUM_E2A_TARGETS_UP	24	0.316844	1.84139	0.011236	0.0566337	1
SIMBULAN_PARP1_TARGETS_DN	16	0.38835	1.8404	0.0147059	0.0566909	1
ZHANG_INTERFERON_RESPONSE	17	0.360124	1.83823	0.0059761	0.0571625	1
MARKEY_RB1_CHRONIC_LOF_UP	96	0.162017	1.83439	0.0138889	0.058131	1
ZHANG_RESPONSE_TO_IKK_INHIBITOR_AND_TNF_DN	84	0.175434	1.81989	0.0101215	0.0623241	1
KRASNOSELSKAYA_ILF3_TARGETS_DN	40	0.232396	1.80744	0.0207469	0.0663372	1
LIU_CDX2_TARGETS_UP	17	0.37035	1.80286	0.00790514	0.067702	1
HELLER_HDAC_TARGETS_SILENCED_BY_METHYLATION_DN	219	0.1052	1.79944	0.0117188	0.0687541	1
LIU_LIVER_CANCER	23	0.31525	1.79826	0.0159363	0.0688608	1
MILI_PSEUDOPODIA_CHEMOTAXIS_DN	393	0.0763122	1.79496	0.00954198	0.0692338	1
BOSCO_INTERFERON_INDUCED_ANTIVIRAL_MODULE	56	0.206749	1.79508	0.018595	0.0695188	1
BOYLAN_MULTIPLE_MYELOMA_C_D_UP	111	0.146113	1.79524	0.0193424	0.0697923	1
GEORGES_CELL_CYCLE_MIR192_TARGETS	57	0.201835	1.79004	0.0135659	0.0706837	1
NIKOLSKY_BREAST_CANCER_7P22_AMPLICON	32	0.264894	1.78487	0.0136719	0.0723024	1
DER_IFN_ALPHA_RESPONSE_UP	56	0.206309	1.78133	0.00578035	0.0733394	1
BROWNE_HCMV_INFECTION_8HR_DN	33	0.257789	1.77005	0.0197628	0.077417	1
PEART_HDAC_PROLIFERATION_CLUSTER_DN	62	0.192469	1.76737	0.0194932	0.0781493	1
DAZARD_UV_RESPONSE_CLUSTER_G6	124	0.136466	1.75551	0.0199203	0.0825353	1
PEREZ_TP53_AND_TP63_TARGETS	158	0.120233	1.75355	0.0251451	0.0830484	1
ZHAN_EARLY_DIFFERENTIATION_GENES_DN	32	0.25909	1.74658	0.0195312	0.0857844	1
LEE_METASTASIS_AND_ALTERNATIVE_SPLICING_DN	36	0.24489	1.73841	0.030426	0.0888483	1
NIKOLSKY_BREAST_CANCER_16Q24_AMPLICON	40	0.231411	1.73538	0.026975	0.0898873	1
HU_GENOTOXIC_DAMAGE_4HR	29	0.265617	1.73428	0.0199203	0.0900806	1
DEURIG_T_CELL_PROLYMPHOCYTIC_LEUKEMIA_UP	273	0.0908968	1.72508	0.0261569	0.0940061	1
NUMATA_CSF3_SIGNALING_VIA_STAT3	16	0.348668	1.72054	0.025	0.0953627	1
BILD_MYC_ONCOGENIC_SIGNATURE	168	0.114368	1.72096	0.0301205	0.0955547	1
KATSANOU_ELAVL1_TARGETS_DN	107	0.141062	1.718	0.0171674	0.0962096	1
HELLER_SILENCED_BY_METHYLATION_UP	185	0.106466	1.7108	0.0283976	0.0993506	1
KIM_ALL_DISORDERS_CALB1_CORR_DN	15	0.370275	1.70055	0.0261682	0.104084	1
YANG_BREAST_CANCER_ESR1_LASER_UP	25	0.290594	1.69593	0.014433	0.105554	1
CHANDRAN_METASTASIS_UP	158	0.118453	1.69626	0.0277228	0.105826	1
WUNDER_INFLAMMATORY_RESPONSE_AND_CHOLESTEROL_UP	37	0.230719	1.68883	0.0232108	0.10902	1
BENPORATH_ES_1	302	0.0845076	1.68384	0.0289256	0.111277	1
ICHIBA_GRAFT_VERSUS_HOST_DISEASE_D7_UP	81	0.157017	1.67312	0.0337972	0.116799	1
GRAHAM_CML_QUIESCENT_VS_NORMAL_QUIESCENT_UP	66	0.175643	1.66962	0.042065	0.118419	1
MEISSNER_BRAIN_HCP_WITH_H3K4ME2_AND_H3K27ME3	21	0.311369	1.66768	0.0384615	0.118953	1
BURTON_ADIPOGENESIS_1	27	0.265287	1.66075	0.0344828	0.121441	1
MONNIER_POSTRADIATION_TUMOR_ESCAPE_UP	350	0.0771413	1.66101	0.0302419	0.121808	1
MARTINEZ_TP53_TARGETS_DN	454	0.0700739	1.66177	0.029703	0.121921	1
BIDUS_METASTASIS_DN	111	0.13832	1.65847	0.0470348	0.122325	1
NIKOLSKY_BREAST_CANCER_16P13_AMPLICON	70	0.171541	1.65736	0.0353635	0.122451	1
STAMBOLSKY_TARGETS_OF_MUTATED_TP53_DN	37	0.230179	1.65384	0.0385396	0.124096	1
DASU_IL6_SIGNALING_SCAR_UP	27	0.259453	1.6492	0.0376984	0.126376	1
CROONQUIST_NRAS_VS_STROMAL_STIMULATION_DN	84	0.154161	1.64821	0.046371	0.126487	1
WHITE_NEUROBLASTOMA_WITH_1P36.3_DELETION	16	0.34643	1.64569	0.0523013	0.127495	1
WANG_CISPLATIN_RESPONSE_AND_XPC_UP	126	0.124329	1.64473	0.0416667	0.127581	1
KLEIN_TARGETS_OF_BCR_ABL1_FUSION	30	0.251022	1.63479	0.0397614	0.133418	1
NAKAYAMA_SOFT_TISSUE_TUMORS_PCA1_DN	59	0.183232	1.63286	0.0414201	0.134135	1
YU_BAP1_TARGETS	26	0.266952	1.62589	0.033195	0.137702	1
SLEBOS_HEAD_AND_NECK_CANCER_WITH_HPV_UP	60	0.178665	1.62453	0.0359848	0.138064	1
GROSS_HYPOXIA_VIA_ELK3_AND_HIF1A_DN	94	0.147122	1.626	0.03125	0.138168	1
DER_IFN_BETA_RESPONSE_UP	86	0.150956	1.62344	0.0420168	0.138321	1
VALK_AML_CLUSTER_10	25	0.269684	1.61971	0.030426	0.139751	1
AMIT_EGF_RESPONSE_40_HELA	39	0.214638	1.61988	0.042471	0.140169	1
SHEN_SMARCA2_TARGETS_DN	126	0.120199	1.61775	0.0353635	0.14066	1
OHM_METHYLATED_IN_ADULT_CANCERS	22	0.283978	1.60733	0.0471698	0.146332	1
LI_INDUCED_T_TO_NATURAL_KILLER_DN	108	0.133367	1.60816	0.046	0.146871	1
MARSON_FOXP3_TARGETS_DN	41	0.207708	1.60734	0.0367505	0.146889	1
RODRIGUES_NTN1_AND_DCC_TARGETS	23	0.276676	1.60196	0.015534	0.149415	1
MARIADASON_REGULATED_BY_HISTONE_ACETYLATION_UP	52	0.193344	1.59898	0.0451977	0.150968	1
GRAESSMANN_RESPONSE_TO_MC_AND_SERUM_DEPRIVATION_DN	64	0.168174	1.58666	0.0389864	0.159242	1
LOPES_METHYLATED_IN_COLON_CANCER_UP	17	0.324836	1.58416	0.0425101	0.160417	1
MIKKELSEN_IPS_LCP_WITH_H3K4ME3	93	0.142536	1.58322	0.0631365	0.160573	1
PHONG_TNF_RESPONSE_NOT_VIA_P38	295	0.0787439	1.58114	0.0442105	0.161558	1
LIM_MAMMARY_STEM_CELL_DN	313	0.0776867	1.57529	0.0460922	0.165552	1
JACKSON_DNMT1_TARGETS_DN	18	0.307494	1.57312	0.0403226	0.165906	1
BILD_HRAS_ONCOGENIC_SIGNATURE	188	0.100411	1.57128	0.0518962	0.166231	1
BOSCO_TH1_CYTOTOXIC_MODULE	54	0.17901	1.57329	0.0372549	0.166383	1
SANSOM_APC_TARGETS	154	0.11019	1.57166	0.0555556	0.166551	1
NIKOLSKY_MUTATED_AND_AMPLIFIED_IN_BREAST_CANCER	70	0.157376	1.55711	0.0474308	0.176209	1
KORKOLA_EMBRYONIC_CARCINOMA_VS_SEMINOMA_DN	16	0.318355	1.55778	0.0362173	0.176303	1
BARRIER_CANCER_RELAPSE_NORMAL_SAMPLE_DN	28	0.241245	1.55614	0.0794979	0.17635	1
HUANG_GATA2_TARGETS_DN	61	0.171492	1.55387	0.0431211	0.177509	1
RICKMAN_METASTASIS_DN	188	0.0983275	1.55262	0.0365854	0.1779	1
CREIGHTON_ENDOCRINE_THERAPY_RESISTANCE_1	420	0.0661836	1.55087	0.0521921	0.178084	1
KYNG_WERNER_SYNDROM_AND_NORMAL_AGING_UP	67	0.158818	1.54976	0.0457143	0.178312	1
WANG_NEOPLASTIC_TRANSFORMATION_BY_CCND1_MYC	18	0.306002	1.55127	0.0590631	0.178409	1
SHARMA_PILOCYTIC_ASTROCYTOMA_LOCATION_UP	20	0.288273	1.54754	0.0566038	0.179448	1
DAZARD_RESPONSE_TO_UV_SCC_DN	101	0.128622	1.54611	0.0475162	0.180029	1
BOYAULT_LIVER_CANCER_SUBCLASS_G1_UP	95	0.134133	1.54336	0.0563991	0.181609	1
JISON_SICKLE_CELL_DISEASE_DN	153	0.105695	1.54174	0.0623701	0.182339	1
LOPES_METHYLATED_IN_COLON_CANCER_DN	22	0.267845	1.53431	0.0572597	0.186852	1
BROWNE_HCMV_INFECTION_10HR_DN	44	0.197283	1.53565	0.049896	0.187028	1
MOREAUX_B_LYMPHOCYTE_MATURATION_BY_TACI_UP	61	0.168327	1.53447	0.0607287	0.187324	1
MOREAUX_MULTIPLE_MYELOMA_BY_TACI_UP	227	0.0900065	1.52895	0.0460922	0.189337	1
KASLER_HDAC7_TARGETS_1_UP	153	0.104116	1.52963	0.072	0.189424	1
CONRAD_STEM_CELL	27	0.250197	1.53026	0.0684105	0.189572	1
PEDERSEN_METASTASIS_BY_ERBB2_ISOFORM_7	297	0.0764256	1.5267	0.0700758	0.190646	1
MORI_MATURE_B_LYMPHOCYTE_DN	64	0.161377	1.51867	0.056338	0.197054	1
FOSTER_TOLERANT_MACROPHAGE_DN	352	0.0703386	1.51374	0.0649606	0.20092	1
WIERENGA_STAT5A_TARGETS_GROUP1	102	0.129303	1.51268	0.0512295	0.20119	1
MEISSNER_NPC_HCP_WITH_H3K4ME2	357	0.0685522	1.50618	0.0650888	0.206385	1
GALINDO_IMMUNE_RESPONSE_TO_ENTEROTOXIN	64	0.157965	1.49111	0.0886598	0.218318	1
SCHLOSSER_MYC_AND_SERUM_RESPONSE_SYNERGY	30	0.223159	1.49154	0.0526316	0.218619	1
MODY_HIPPOCAMPUS_PRENATAL	35	0.212324	1.49217	0.0803213	0.218745	1
KIM_BIPOLAR_DISORDER_OLIGODENDROCYTE_DENSITY_CORR_DN	27	0.237989	1.48832	0.0707269	0.220376	1
NATSUME_RESPONSE_TO_INTERFERON_BETA_UP	53	0.173694	1.48681	0.0688976	0.221108	1
HOSHIDA_LIVER_CANCER_SUBCLASS_S2	100	0.125249	1.48451	0.0804124	0.222647	1
RADAEVA_RESPONSE_TO_IFNA1_UP	37	0.202822	1.47971	0.0764192	0.225045	1
MARTORIATI_MDM4_TARGETS_NEUROEPITHELIUM_UP	136	0.110461	1.48027	0.0647619	0.225286	1
FURUKAWA_DUSP6_TARGETS_PCI35_UP	38	0.200694	1.48027	0.0847108	0.22603	1
BERTUCCI_INVASIVE_CARCINOMA_DUCTAL_VS_LOBULAR_UP	21	0.271304	1.47504	0.0734341	0.228843	1
SAFFORD_T_LYMPHOCYTE_ANERGY	66	0.150711	1.46879	0.0788462	0.234272	1
ROPERO_HDAC2_TARGETS	75	0.142894	1.46768	0.0676983	0.234686	1
YAN_ESCAPE_FROM_ANOIKIS	18	0.288267	1.46627	0.0870445	0.235367	1
MCBRYAN_PUBERTAL_BREAST_5_6WK_DN	113	0.118476	1.46505	0.0772443	0.23591	1
SHIN_B_CELL_LYMPHOMA_CLUSTER_2	21	0.267265	1.46398	0.0872093	0.236296	1
ZHAN_MULTIPLE_MYELOMA_LB_DN	32	0.218516	1.46268	0.0706107	0.23672	1
MULLIGHAN_MLL_SIGNATURE_2_UP	334	0.0702349	1.46027	0.0831556	0.237556	1
ROSS_AML_WITH_AML1_ETO_FUSION	56	0.163648	1.4604	0.0897959	0.238202	1
NAGASHIMA_EGF_SIGNALING_UP	50	0.17597	1.45852	0.0914634	0.238494	1
NAGY_TFTC_COMPONENTS_HUMAN	16	0.30065	1.4498	0.0869565	0.246556	1
WEI_MIR34A_TARGETS	135	0.106577	1.44571	0.10566	0.249951	1
Negatively enriched in NEL-CRE
NAME	SIZE	ES	NES	NOM p-val	FDR q-val	FWER p-val
MILI_PSEUDOPODIA_HAPTOTAXIS_UP	455	-0.277615	-6.77581	0	0	0
STARK_PREFRONTAL_CORTEX_22Q11_DELETION_DN	460	-0.266313	-6.42928	0	0	0
FLECHNER_BIOPSY_KIDNEY_TRANSPLANT_REJECTED_VS_OK_DN	426	-0.257509	-6.19117	0	0	0
SHEN_SMARCA2_TARGETS_UP	397	-0.249483	-5.80227	0	0	0
REN_ALVEOLAR_RHABDOMYOSARCOMA_DN	385	-0.235665	-5.33173	0	0	0
FLECHNER_BIOPSY_KIDNEY_TRANSPLANT_OK_VS_DONOR_UP	489	-0.195786	-4.96214	0	0	0
MOOTHA_PGC	363	-0.214119	-4.74794	0	0	0
BLALOCK_ALZHEIMERS_DISEASE_INCIPIENT_DN	147	-0.301268	-4.29015	0	0	0
WONG_MITOCHONDRIA_GENE_MODULE	187	-0.259303	-4.12127	0	0	0
YAO_TEMPORAL_RESPONSE_TO_PROGESTERONE_CLUSTER_13	157	-0.280155	-4.09474	0	0	0
LU_AGING_BRAIN_DN	138	-0.300682	-4.0911	0	0	0
LEE_TARGETS_OF_PTCH1_AND_SUFU_DN	78	-0.389497	-4.0423	0	0	0
WELCSH_BRCA1_TARGETS_UP	169	-0.257886	-3.89708	0	0	0
MOOTHA_HUMAN_MITODB_6_2002	362	-0.176393	-3.8319	0	0	0
ALONSO_METASTASIS_UP	163	-0.257061	-3.79707	0	0	0
ONKEN_UVEAL_MELANOMA_DN	459	-0.150161	-3.78295	0	0	0
HSIAO_HOUSEKEEPING_GENES	339	-0.180409	-3.73371	0	0	0
MOOTHA_MITOCHONDRIA	372	-0.168478	-3.63819	0	0	0
LU_AGING_BRAIN_UP	231	-0.204083	-3.61271	0	0	0
BAELDE_DIABETIC_NEPHROPATHY_DN	383	-0.160315	-3.56798	0	0	0
MIKKELSEN_NPC_ICP_WITH_H3K4ME3	364	-0.164899	-3.5456	0	0	0
WANG_TUMOR_INVASIVENESS_UP	342	-0.160125	-3.49114	0	0	0
BERENJENO_TRANSFORMED_BY_RHOA_DN	353	-0.160606	-3.39037	0	0	0
LAIHO_COLORECTAL_CANCER_SERRATED_UP	99	-0.288695	-3.36315	0	0	0
JOHANSSON_BRAIN_CANCER_EARLY_VS_LATE_DN	39	-0.441858	-3.30627	0	0	0
VERHAAK_GLIOBLASTOMA_NEURAL	103	-0.276091	-3.27303	0	0	0
ONDER_CDH1_TARGETS_2_UP	225	-0.185426	-3.27216	0	0	0
BORCZUK_MALIGNANT_MESOTHELIOMA_UP	277	-0.168022	-3.25224	0	0	0
PICCALUGA_ANGIOIMMUNOBLASTIC_LYMPHOMA_UP	174	-0.212952	-3.19736	0	0	0
MODY_HIPPOCAMPUS_POSTNATAL	55	-0.368103	-3.18837	0	0	0
MARTINEZ_TP53_TARGETS_UP	461	-0.12369	-3.07067	0	3.35243e-05	0.001
DAVICIONI_TARGETS_OF_PAX_FOXO1_FUSIONS_UP	219	-0.183217	-3.08185	0	3.44556e-05	0.001
MASSARWEH_TAMOXIFEN_RESISTANCE_UP	450	-0.125426	-3.0834	0	3.544e-05	0.001
LI_WILMS_TUMOR_VS_FETAL_KIDNEY_1_UP	159	-0.212789	-3.08795	0	3.64824e-05	0.001
JIANG_AGING_HYPOTHALAMUS_DN	33	-0.458248	-3.12721	0	3.75879e-05	0.001
VECCHI_GASTRIC_CANCER_EARLY_DN	225	-0.181957	-3.13753	0	3.87625e-05	0.001
KAAB_HEART_ATRIUM_VS_VENTRICLE_DN	219	-0.186043	-3.17177	0	4.00129e-05	0.001
PELLICCIOTTA_HDAC_IN_ANTIGEN_PRESENTATION_UP	61	-0.336519	-3.04777	0	9.83731e-05	0.003
JIANG_AGING_CEREBRAL_CORTEX_DN	46	-0.363452	-2.97876	0	0.000115999	0.004
COLIN_PILOCYTIC_ASTROCYTOMA_VS_GLIOBLASTOMA_UP	29	-0.461713	-2.98047	0	0.000118761	0.004
MOOTHA_VOXPHOS	69	-0.314789	-3.00549	0	0.000121658	0.004
APPEL_IMATINIB_RESPONSE	30	-0.452543	-3.00606	0	0.000124699	0.004
CREIGHTON_ENDOCRINE_THERAPY_RESISTANCE_5	386	-0.135759	-3.01605	0	0.000127897	0.004
MARTINEZ_RB1_AND_TP53_TARGETS_UP	451	-0.120244	-2.95166	0	0.000190988	0.007
THUM_SYSTOLIC_HEART_FAILURE_UP	329	-0.143942	-2.95696	0	0.000195232	0.007
WANG_SMARCE1_TARGETS_UP	228	-0.171479	-2.96383	0	0.000199669	0.007
MARTORIATI_MDM4_TARGETS_NEUROEPITHELIUM_DN	125	-0.223999	-2.90786	0	0.000216091	0.009
RIGGINS_TAMOXIFEN_RESISTANCE_DN	176	-0.192511	-2.91707	0	0.000220328	0.009
DELYS_THYROID_CANCER_UP	325	-0.141726	-2.92281	0	0.000224735	0.009
WANG_LMO4_TARGETS_DN	309	-0.143918	-2.93849	0	0.000229321	0.009
MCCLUNG_CREB1_TARGETS_UP	84	-0.274667	-2.94597	0	0.000234099	0.009
SCHUETZ_BREAST_CANCER_DUCTAL_INVASIVE_UP	273	-0.154044	-2.94718	0	0.000239079	0.009
RAGHAVACHARI_PLATELET_SPECIFIC_GENES	56	-0.327934	-2.88854	0	0.000277519	0.012
BURTON_ADIPOGENESIS_6	145	-0.204299	-2.89339	0	0.000282755	0.012
AZARE_NEOPLASTIC_TRANSFORMATION_BY_STAT3_UP	94	-0.254731	-2.86153	0	0.000295845	0.013
KYNG_ENVIRONMENTAL_STRESS_RESPONSE_UP	43	-0.366427	-2.85282	0	0.000335808	0.015
SCHAEFFER_PROSTATE_DEVELOPMENT_48HR_UP	302	-0.14253	-2.84239	0	0.000345632	0.016
LANDIS_ERBB2_BREAST_TUMORS_324_DN	123	-0.219858	-2.8511	0	0.000351696	0.016
VECCHI_GASTRIC_CANCER_ADVANCED_VS_EARLY_UP	141	-0.202932	-2.8315	0	0.000360385	0.016
BARRIER_COLON_CANCER_RECURRENCE_UP	35	-0.40271	-2.82724	0	0.000362954	0.017
GOTZMANN_EPITHELIAL_TO_MESENCHYMAL_TRANSITION_DN	160	-0.190167	-2.82753	0	0.000368904	0.017
RUTELLA_RESPONSE_TO_HGF_VS_CSF2RB_AND_IL4_UP	318	-0.137727	-2.82078	0	0.000370832	0.018
LANDIS_ERBB2_BREAST_TUMORS_65_DN	32	-0.426393	-2.82945	0	0.000375052	0.017
LEIN_OLIGODENDROCYTE_MARKERS	65	-0.296896	-2.82285	0	0.000376718	0.018
HOSHIDA_LIVER_CANCER_SUBCLASS_S3	171	-0.182394	-2.81825	0	0.000384258	0.019
STEIN_ESRRA_TARGETS_UP	321	-0.137991	-2.80465	0	0.000397167	0.02
YAO_TEMPORAL_RESPONSE_TO_PROGESTERONE_CLUSTER_17	170	-0.182765	-2.78415	0	0.000456303	0.025
SWEET_LUNG_CANCER_KRAS_UP	356	-0.129323	-2.78956	0	0.000458492	0.024
ENK_UV_RESPONSE_KERATINOCYTE_DN	432	-0.11687	-2.78019	0	0.000461395	0.026
GRUETZMANN_PANCREATIC_CANCER_DN	154	-0.190544	-2.78555	0	0.000462822	0.025
SEIDEN_ONCOGENESIS_BY_MET	78	-0.271402	-2.79492	0	0.000465336	0.024
KIM_ALL_DISORDERS_DURATION_CORR_DN	134	-0.2075	-2.78124	0	0.000467804	0.026
MARTINEZ_RESPONSE_TO_TRABECTEDIN_UP	59	-0.307589	-2.7885	0	0.000469529	0.025
ANASTASSIOU_MULTICANCER_INVASIVENESS_SIGNATURE	55	-0.319623	-2.75787	0	0.000489917	0.028
YOSHIMURA_MAPK8_TARGETS_DN	311	-0.137401	-2.75356	0	0.000500034	0.029
ROY_WOUND_BLOOD_VESSEL_UP	44	-0.349886	-2.74121	0	0.000542929	0.032
WATANABE_RECTAL_CANCER_RADIOTHERAPY_RESPONSIVE_DN	78	-0.260961	-2.72834	0	0.000553688	0.033
SEIDEN_MET_SIGNALING	18	-0.545743	-2.73743	0	0.000560787	0.033
GAVIN_FOXP3_TARGETS_CLUSTER_T4	76	-0.270029	-2.73808	0	0.00056807	0.033
YAO_TEMPORAL_RESPONSE_TO_PROGESTERONE_CLUSTER_10	62	-0.29232	-2.71199	0	0.000719089	0.044
MONNIER_POSTRADIATION_TUMOR_ESCAPE_DN	314	-0.133543	-2.696	0	0.000865434	0.054
SPIRA_SMOKERS_LUNG_CANCER_UP	31	-0.402632	-2.69108	0	0.000891329	0.057
LEIN_NEURON_MARKERS	66	-0.28076	-2.69297	0	0.000902199	0.057
DING_LUNG_CANCER_EXPRESSION_BY_COPY_NUMBER	93	-0.240135	-2.68257	0	0.000925926	0.06
CHARAFE_BREAST_CANCER_LUMINAL_VS_BASAL_DN	343	-0.124708	-2.66762	0	0.000977586	0.065
SENESE_HDAC3_TARGETS_UP	401	-0.115715	-2.66876	0	0.000989087	0.065
SCHAEFFER_PROSTATE_DEVELOPMENT_6HR_UP	118	-0.206854	-2.6592	0	0.000995009	0.067
PETRETTO_CARDIAC_HYPERTROPHY	33	-0.379557	-2.65382	0	0.00103988	0.071
YAMASHITA_METHYLATED_IN_PROSTATE_CANCER	31	-0.400466	-2.6187	0	0.00111464	0.079
SWEET_LUNG_CANCER_KRAS_DN	302	-0.130661	-2.62161	0	0.00112598	0.078
GOLDRATH_HOMEOSTATIC_PROLIFERATION	124	-0.200679	-2.62075	0	0.00112702	0.079
RUTELLA_RESPONSE_TO_HGF_UP	332	-0.123176	-2.59947	0	0.00129185	0.092
BAE_BRCA1_TARGETS_UP	61	-0.278444	-2.5853	0	0.00143907	0.103
WAMUNYOKOLI_OVARIAN_CANCER_LMP_DN	163	-0.172703	-2.58251	0	0.00146365	0.106
PASINI_SUZ12_TARGETS_DN	273	-0.13879	-2.57138	0	0.00150013	0.11
FRASOR_RESPONSE_TO_SERM_OR_FULVESTRANT_UP	19	-0.498386	-2.56423	0	0.00154951	0.115
GRUETZMANN_PANCREATIC_CANCER_UP	306	-0.127228	-2.56261	0	0.00157154	0.118
DANG_REGULATED_BY_MYC_DN	216	-0.148962	-2.55144	0	0.00169638	0.128
LEIN_ASTROCYTE_MARKERS	36	-0.359522	-2.54827	0	0.00170485	0.13
SWEET_KRAS_ONCOGENIC_SIGNATURE	72	-0.250792	-2.54167	0	0.00173712	0.134
FULCHER_INFLAMMATORY_RESPONSE_LECTIN_VS_LPS_UP	464	-0.0997175	-2.53932	0.00197628	0.00177034	0.138
RICKMAN_TUMOR_DIFFERENTIATED_WELL_VS_POORLY_DN	279	-0.134101	-2.538	0	0.0017897	0.141
ZHONG_SECRETOME_OF_LUNG_CANCER_AND_FIBROBLAST	110	-0.208079	-2.53412	0	0.00182128	0.145
SANA_RESPONSE_TO_IFNG_DN	76	-0.24532	-2.53142	0	0.00187562	0.15
VERRECCHIA_EARLY_RESPONSE_TO_TGFB1	51	-0.287935	-2.49155	0	0.00261975	0.201
KIM_MYC_AMPLIFICATION_TARGETS_UP	169	-0.165461	-2.47618	0	0.00293487	0.225
BURTON_ADIPOGENESIS_8	72	-0.248314	-2.47105	0	0.00297233	0.232
FARMER_BREAST_CANCER_APOCRINE_VS_LUMINAL	236	-0.139024	-2.47201	0	0.00300011	0.232
TIEN_INTESTINE_PROBIOTICS_24HR_DN	178	-0.157988	-2.4453	0	0.00368796	0.285
HIRSCH_CELLULAR_TRANSFORMATION_SIGNATURE_UP	199	-0.150964	-2.43853	0	0.00379115	0.294
SASSON_RESPONSE_TO_GONADOTROPHINS_UP	74	-0.237544	-2.43632	0	0.0038132	0.297
BOQUEST_STEM_CELL_UP	197	-0.152082	-2.42567	0	0.00404978	0.32
BILANGES_RAPAMYCIN_SENSITIVE_VIA_TSC1_AND_TSC2	60	-0.261488	-2.42634	0	0.00406373	0.318
RUIZ_TNC_TARGETS_UP	132	-0.182292	-2.4283	0	0.00407746	0.317
RODWELL_AGING_KIDNEY_NO_BLOOD_DN	116	-0.1912	-2.42949	0	0.00409204	0.315
DAZARD_RESPONSE_TO_UV_SCC_UP	84	-0.221437	-2.41665	0	0.00416997	0.334
NADLER_OBESITY_UP	53	-0.283155	-2.41681	0	0.00420562	0.334
WAKABAYASHI_ADIPOGENESIS_PPARG_RXRA_BOUND_WITH_H4K20ME1_MARK	132	-0.173112	-2.41706	0	0.00423127	0.333
HAN_SATB1_TARGETS_UP	333	-0.113364	-2.40972	0	0.00426657	0.346
PODAR_RESPONSE_TO_ADAPHOSTIN_UP	116	-0.192977	-2.41249	0.00192678	0.00427102	0.344
VIETOR_IFRD1_TARGETS	15	-0.504002	-2.40731	0	0.00431405	0.349
RAO_BOUND_BY_SALL4_ISOFORM_A	121	-0.18502	-2.40012	0	0.00461625	0.373
RICKMAN_HEAD_AND_NECK_CANCER_C	37	-0.330586	-2.39282	0	0.00482487	0.392
TOOKER_GEMCITABINE_RESISTANCE_DN	105	-0.202534	-2.39342	0	0.0048433	0.39
KAYO_CALORIE_RESTRICTION_MUSCLE_UP	74	-0.234714	-2.39054	0	0.00486589	0.396
HOWLIN_CITED1_TARGETS_1_DN	30	-0.368887	-2.3808	0.00200803	0.00514509	0.414
SESTO_RESPONSE_TO_UV_C0	88	-0.210984	-2.37799	0	0.00520323	0.42
DE_YY1_TARGETS_DN	89	-0.219398	-2.37605	0.00196464	0.00524067	0.424
BURTON_ADIPOGENESIS_5	99	-0.204203	-2.36124	0	0.00579118	0.461
CHIANG_LIVER_CANCER_SUBCLASS_UNANNOTATED_DN	175	-0.155542	-2.35636	0	0.00591995	0.47
BRUECKNER_TARGETS_OF_MIRLET7A3_DN	61	-0.253637	-2.35208	0	0.00599866	0.473
ZHONG_SECRETOME_OF_LUNG_CANCER_AND_MACROPHAGE	69	-0.242765	-2.34849	0	0.00609375	0.476
WU_CELL_MIGRATION	116	-0.186225	-2.34774	0	0.00609534	0.48
MORI_PLASMA_CELL_UP	46	-0.293378	-2.33994	0	0.00640347	0.501
ENK_UV_RESPONSE_KERATINOCYTE_UP	394	-0.103733	-2.33474	0.0020284	0.00647414	0.514
LANDIS_BREAST_CANCER_PROGRESSION_DN	59	-0.254151	-2.33514	0.0019802	0.00652174	0.514
IWANAGA_CARCINOGENESIS_BY_KRAS_UP	126	-0.179424	-2.33545	0.00206186	0.00656068	0.513
BOUDOUKHA_BOUND_BY_IGF2BP2	89	-0.209895	-2.32171	0	0.00704581	0.544
MIKKELSEN_ES_ICP_WITH_H3K4ME3	445	-0.0957443	-2.31993	0.00194932	0.00704951	0.547
KARLSSON_TGFB1_TARGETS_DN	179	-0.151399	-2.31253	0	0.00735431	0.566
IGLESIAS_E2F_TARGETS_UP	116	-0.185008	-2.30774	0	0.00765498	0.585
MCCLUNG_DELTA_FOSB_TARGETS_8WK	48	-0.286552	-2.29992	0	0.00804998	0.6
SUNG_METASTASIS_STROMA_UP	95	-0.200867	-2.2959	0.00574713	0.00828143	0.612
KAAB_HEART_ATRIUM_VS_VENTRICLE_UP	214	-0.135735	-2.29442	0.00213675	0.00829291	0.614
LENAOUR_DENDRITIC_CELL_MATURATION_UP	82	-0.209247	-2.29325	0	0.0083309	0.617
DELYS_THYROID_CANCER_DN	177	-0.146857	-2.28869	0	0.00850397	0.628
SCHLOSSER_MYC_TARGETS_REPRESSED_BY_SERUM	136	-0.166044	-2.28221	0	0.00881886	0.639
LEI_MYB_TARGETS	238	-0.127723	-2.28076	0.00196464	0.00886865	0.645
LE_EGR2_TARGETS_DN	89	-0.209386	-2.27493	0	0.00896572	0.654
BONOME_OVARIAN_CANCER_POOR_SURVIVAL_UP	30	-0.354033	-2.27697	0.00192678	0.00896674	0.652
PAPASPYRIDONOS_UNSTABLE_ATEROSCLEROTIC_PLAQUE_UP	45	-0.285457	-2.26622	0	0.00933006	0.681
WINTER_HYPOXIA_METAGENE	192	-0.140421	-2.26099	0	0.00958105	0.693
YAO_TEMPORAL_RESPONSE_TO_PROGESTERONE_CLUSTER_12	73	-0.223357	-2.25249	0.00396825	0.0100552	0.709
YAO_TEMPORAL_RESPONSE_TO_PROGESTERONE_CLUSTER_0	67	-0.235387	-2.24968	0.0039604	0.0102673	0.719
JISON_SICKLE_CELL_DISEASE_UP	145	-0.159132	-2.2412	0.00619835	0.0108476	0.741
DAVICIONI_RHABDOMYOSARCOMA_PAX_FOXO1_FUSION_UP	55	-0.255854	-2.23858	0.00204499	0.0109142	0.747
STEIN_ESRRA_TARGETS	433	-0.0949176	-2.23294	0.00199601	0.0113299	0.756
TAKAO_RESPONSE_TO_UVB_RADIATION_UP	72	-0.223616	-2.23009	0	0.0113924	0.762
GAUSSMANN_MLL_AF4_FUSION_TARGETS_E_UP	79	-0.209264	-2.22818	0	0.0114054	0.767
BOYAULT_LIVER_CANCER_SUBCLASS_G1_DN	30	-0.343822	-2.23073	0	0.0114091	0.76
LEE_LIVER_CANCER_E2F1_DN	32	-0.329974	-2.22888	0	0.0114222	0.766
SENGUPTA_NASOPHARYNGEAL_CARCINOMA_WITH_LMP1_UP	297	-0.113852	-2.2263	0	0.0114824	0.77
IVANOVA_HEMATOPOIESIS_MATURE_CELL	231	-0.126566	-2.22171	0.00206186	0.0117188	0.779
KAAB_FAILED_HEART_ATRIUM_DN	130	-0.171988	-2.21747	0	0.0120458	0.797
JIANG_HYPOXIA_NORMAL	174	-0.141089	-2.21646	0.00202429	0.0120798	0.801
KYNG_DNA_DAMAGE_DN	148	-0.158168	-2.2068	0	0.0126845	0.821
THUM_MIR21_TARGETS_HEART_DISEASE_UP	15	-0.475892	-2.20756	0.00201207	0.0127156	0.82
WANG_CISPLATIN_RESPONSE_AND_XPC_DN	183	-0.139793	-2.1977	0	0.0132113	0.837
CLASPER_LYMPHATIC_VESSELS_DURING_METASTASIS_DN	32	-0.327972	-2.19801	0.00390625	0.0132594	0.837
ACEVEDO_LIVER_CANCER_WITH_H3K27ME3_UP	153	-0.155016	-2.19886	0	0.0132788	0.836
ROSS_AML_OF_FAB_M7_TYPE	58	-0.243885	-2.18289	0.00210526	0.0146129	0.861
TARTE_PLASMA_CELL_VS_B_LYMPHOCYTE_UP	66	-0.22361	-2.1784	0.0019305	0.0147363	0.867
RHEIN_ALL_GLUCOCORTICOID_THERAPY_DN	328	-0.106246	-2.1798	0.0019685	0.0147841	0.863
YANG_BREAST_CANCER_ESR1_BULK_UP	20	-0.405407	-2.17863	0.0039604	0.014807	0.867
TURASHVILI_BREAST_LOBULAR_CARCINOMA_VS_DUCTAL_NORMAL_UP	57	-0.244288	-2.1765	0	0.0148515	0.872
OUELLET_OVARIAN_CANCER_INVASIVE_VS_LMP_UP	99	-0.187582	-2.17223	0.00203666	0.0151711	0.874
ZHAN_LATE_DIFFERENTIATION_GENES_UP	31	-0.331918	-2.16836	0	0.0153723	0.883
LE_NEURONAL_DIFFERENTIATION_UP	17	-0.440218	-2.16751	0	0.0153913	0.884
MAHAJAN_RESPONSE_TO_IL1A_DN	63	-0.23236	-2.16569	0.00194175	0.0154006	0.886
YAMAZAKI_TCEB3_TARGETS_UP	148	-0.152052	-2.16866	0	0.0154378	0.881
VILLANUEVA_LIVER_CANCER_KRT19_DN	40	-0.286055	-2.16586	0.00204082	0.0154722	0.886
LIU_PROSTATE_CANCER_DN	366	-0.0966745	-2.1626	0.00200803	0.0156462	0.891
NAKAYAMA_SOFT_TISSUE_TUMORS_PCA1_UP	48	-0.257446	-2.15901	0.00197239	0.0157568	0.897
TIEN_INTESTINE_PROBIOTICS_24HR_UP	500	-0.0837578	-2.16002	0.0019802	0.015775	0.897
WANG_CLIM2_TARGETS_DN	146	-0.157698	-2.16003	0	0.0158612	0.897
OUELLET_CULTURED_OVARIAN_CANCER_INVASIVE_VS_LMP_UP	57	-0.240087	-2.15285	0.00625	0.0163461	0.903
CHESLER_BRAIN_HIGHEST_EXPRESSION	38	-0.296164	-2.15201	0.00215054	0.0163739	0.904
HERNANDEZ_ABERRANT_MITOSIS_BY_DOCETACEL_2NM_UP	57	-0.238466	-2.1398	0.00410678	0.0175049	0.914
JIANG_AGING_HYPOTHALAMUS_UP	36	-0.302302	-2.1402	0	0.0175446	0.914
LEIN_LOCALIZED_TO_PROXIMAL_DENDRITES	34	-0.311621	-2.13823	0	0.0176369	0.918
BLUM_RESPONSE_TO_SALIRASIB_UP	207	-0.130121	-2.13465	0.00625	0.017699	0.918
UEDA_CENTRAL_CLOCK	75	-0.205937	-2.13492	0.00641026	0.0177849	0.918
ZHAN_V1_LATE_DIFFERENTIATION_GENES_UP	26	-0.357121	-2.13566	0	0.0177997	0.918
YANAGIHARA_ESX1_TARGETS	26	-0.352833	-2.13273	0.00194932	0.01782	0.92
WANG_ESOPHAGUS_CANCER_VS_NORMAL_DN	85	-0.198771	-2.12894	0.00200803	0.0181422	0.926
TURASHVILI_BREAST_DUCTAL_CARCINOMA_VS_LOBULAR_NORMAL_DN	38	-0.290577	-2.12562	0	0.0183881	0.931
ALONSO_METASTASIS_EMT_UP	28	-0.340885	-2.12589	0.00385356	0.018444	0.93
LIN_NPAS4_TARGETS_UP	154	-0.148568	-2.12283	0	0.0186366	0.937
KARLSSON_TGFB1_TARGETS_UP	116	-0.170212	-2.11897	0	0.0189642	0.939
IGARASHI_ATF4_TARGETS_DN	76	-0.21013	-2.11487	0	0.0194086	0.943
KONDO_EZH2_TARGETS	157	-0.141887	-2.10562	0.00205761	0.0204053	0.948
LEE_AGING_NEOCORTEX_UP	67	-0.22608	-2.10425	0.0040404	0.0204655	0.949
SABATES_COLORECTAL_ADENOMA_DN	149	-0.146654	-2.09367	0	0.021307	0.965
LEIN_PONS_MARKERS	75	-0.206917	-2.09413	0.00202429	0.0213679	0.965
LI_AMPLIFIED_IN_LUNG_CANCER	141	-0.155588	-2.09479	0.00548446	0.021393	0.964
HOLLMANN_APOPTOSIS_VIA_CD40_DN	194	-0.12971	-2.09522	0.00195312	0.0214555	0.964
WESTON_VEGFA_TARGETS	73	-0.207251	-2.08973	0.00596422	0.0217608	0.97
RODWELL_AGING_KIDNEY_NO_BLOOD_UP	169	-0.138538	-2.08363	0.002	0.0224241	0.974
RAMALHO_STEMNESS_UP	174	-0.136077	-2.07824	0.00806452	0.023099	0.975
ONDER_CDH1_SIGNALING_VIA_CTNNB1	73	-0.207937	-2.07528	0.00628931	0.0233641	0.976
SIMBULAN_PARP1_TARGETS_UP	23	-0.360689	-2.07246	0.00195695	0.0237103	0.976
CHARAFE_BREAST_CANCER_LUMINAL_VS_MESENCHYMAL_DN	404	-0.0893117	-2.06631	0.0040568	0.0240952	0.98
FRASOR_RESPONSE_TO_ESTRADIOL_DN	59	-0.228076	-2.06901	0	0.0240992	0.979
HSIAO_LIVER_SPECIFIC_GENES	98	-0.175791	-2.06803	0.00195695	0.0241159	0.979
BYSTRYKH_HEMATOPOIESIS_STEM_CELL_QTL_CIS	108	-0.169427	-2.06945	0.0020284	0.0241539	0.979
CHAUHAN_RESPONSE_TO_METHOXYESTRADIOL_DN	91	-0.184696	-2.06684	0.00205761	0.0241603	0.98
KENNY_CTNNB1_TARGETS_DN	42	-0.278323	-2.06514	0.00186916	0.024185	0.98
SASSON_RESPONSE_TO_FORSKOLIN_UP	76	-0.202995	-2.06395	0.0041841	0.0242056	0.981
CHICAS_RB1_TARGETS_CONFLUENT	443	-0.0847188	-2.05543	0.00769231	0.0254034	0.984
WANG_TARGETS_OF_MLL_CBP_FUSION_DN	39	-0.274314	-2.05359	0.00584795	0.0256006	0.987
JOHNSTONE_PARVB_TARGETS_2_DN	299	-0.100669	-2.05108	0.0122951	0.0258519	0.987
ABBUD_LIF_SIGNALING_1_DN	18	-0.402095	-2.04779	0.00385356	0.0260569	0.99
CERVERA_SDHB_TARGETS_1_UP	78	-0.196108	-2.04928	0.0039604	0.0260891	0.989
BAKKER_FOXO3_TARGETS_UP	48	-0.249888	-2.04788	0.0056926	0.026168	0.99
KONDO_PROSTATE_CANCER_WITH_H3K27ME3	61	-0.223569	-2.04431	0.00621118	0.026474	0.991
JIANG_TIP30_TARGETS_UP	39	-0.271664	-2.04014	0	0.0270046	0.992
ELLWOOD_MYC_TARGETS_DN	31	-0.306676	-2.03455	0.00604839	0.0276874	0.992
ASTON_MAJOR_DEPRESSIVE_DISORDER_DN	140	-0.146781	-2.03482	0.00409836	0.0277542	0.992
DUTERTRE_ESTRADIOL_RESPONSE_24HR_DN	416	-0.0870598	-2.0311	0.00201613	0.0281465	0.994
CROONQUIST_STROMAL_STIMULATION_UP	42	-0.266774	-2.02954	0	0.0282782	0.994
FRIDMAN_SENESCENCE_UP	66	-0.211673	-2.02716	0.00994036	0.0285111	0.995
MCBRYAN_PUBERTAL_BREAST_4_5WK_UP	186	-0.127946	-2.02406	0.00628931	0.0288127	0.996
FARMER_BREAST_CANCER_CLUSTER_4	19	-0.382968	-2.02307	0.00401606	0.0288652	0.996
HOUSTIS_ROS	28	-0.318379	-2.02457	0.0104603	0.0288881	0.996
CROMER_TUMORIGENESIS_UP	39	-0.272023	-2.01977	0.0040404	0.0292989	0.996
TAKEDA_TARGETS_OF_NUP98_HOXA9_FUSION_8D_DN	125	-0.156578	-2.01732	0.00956023	0.0296453	0.996
IKEDA_MIR30_TARGETS_DN	20	-0.374179	-2.0152	0.004	0.0298633	0.996
SMID_BREAST_CANCER_RELAPSE_IN_BONE_UP	56	-0.223078	-2.01381	0.00408163	0.0299418	0.996
NELSON_RESPONSE_TO_ANDROGEN_UP	65	-0.210468	-2.00373	0.00399202	0.0317231	0.996
HORIUCHI_WTAP_TARGETS_UP	236	-0.111576	-1.99967	0.00210526	0.0322891	0.996
IVANOVA_HEMATOPOIESIS_INTERMEDIATE_PROGENITOR	112	-0.15934	-2	0.00744879	0.0323456	0.996
APRELIKOVA_BRCA1_TARGETS	31	-0.296666	-1.9938	0.00192308	0.0332057	0.996
CHEBOTAEV_GR_TARGETS_DN	93	-0.177446	-1.99201	0.00617284	0.0333981	0.996
VANTVEER_BREAST_CANCER_BRCA1_DN	33	-0.288237	-1.99015	0.00806452	0.0336502	0.996
MCBRYAN_PUBERTAL_TGFB1_TARGETS_UP	150	-0.140257	-1.98304	0.00189394	0.0350977	0.998
LIANG_HEMATOPOIESIS_STEM_CELL_NUMBER_LARGE_VS_TINY_UP	34	-0.280626	-1.98252	0.0019802	0.0351786	0.998
SESTO_RESPONSE_TO_UV_C1	55	-0.228102	-1.97775	0.00385356	0.0355918	0.998
BACOLOD_RESISTANCE_TO_ALKYLATING_AGENTS_UP	15	-0.421352	-1.97966	0.0040404	0.0356499	0.998
NAKAMURA_TUMOR_ZONE_PERIPHERAL_VS_CENTRAL_DN	485	-0.079534	-1.97787	0.00628931	0.0356997	0.998
TAKEDA_TARGETS_OF_NUP98_HOXA9_FUSION_10D_DN	83	-0.186997	-1.97645	0	0.0357503	0.998
SCHRAETS_MLL_TARGETS_UP	23	-0.35088	-1.97812	0.00796813	0.0357933	0.998
GINESTIER_BREAST_CANCER_20Q13_AMPLIFICATION_UP	88	-0.175463	-1.97521	0.00996016	0.0359059	0.998
HAN_SATB1_TARGETS_DN	295	-0.1017	-1.97363	0.0105932	0.0361493	0.998
MARCHINI_TRABECTEDIN_RESISTANCE_DN	41	-0.262044	-1.96823	0.00631579	0.0371649	1
FAELT_B_CLL_WITH_VH_REARRANGEMENTS_DN	42	-0.256361	-1.96702	0.00798403	0.0373126	1
JI_RESPONSE_TO_FSH_DN	49	-0.238367	-1.96125	0.00567108	0.0384859	1
STONER_ESOPHAGEAL_CARCINOGENESIS_UP	32	-0.292521	-1.95961	0.00828157	0.038695	1
BROWNE_HCMV_INFECTION_16HR_UP	193	-0.121446	-1.95783	0.00595238	0.038923	1
TERAO_AOX4_TARGETS_HG_UP	23	-0.339718	-1.95403	0.00580271	0.0396839	1
ZHOU_TNF_SIGNALING_30MIN	46	-0.245622	-1.95211	0.00796813	0.0400314	1
CAIRO_LIVER_DEVELOPMENT_DN	125	-0.147971	-1.94781	0.004158	0.0408781	1
PETROVA_PROX1_TARGETS_DN	48	-0.232955	-1.94124	0.00423729	0.0423343	1
DEMAGALHAES_AGING_UP	43	-0.252072	-1.93246	0.00619835	0.0431117	1
AKL_HTLV1_INFECTION_DN	55	-0.222669	-1.93303	0.00580271	0.0431329	1
SHETH_LIVER_CANCER_VS_TXNIP_LOSS_PAM4	186	-0.122351	-1.93342	0.00788955	0.0432107	1
CAIRO_HEPATOBLASTOMA_CLASSES_DN	150	-0.136412	-1.93641	0.0039604	0.0432581	1
ONDER_CDH1_TARGETS_3_UP	16	-0.399925	-1.93444	0.00394477	0.0433198	1
KOBAYASHI_EGFR_SIGNALING_24HR_UP	68	-0.197927	-1.93353	0.00813008	0.0433264	1
JOSEPH_RESPONSE_TO_SODIUM_BUTYRATE_UP	25	-0.331737	-1.93484	0.00395257	0.0433982	1
TIEN_INTESTINE_PROBIOTICS_6HR_DN	151	-0.136465	-1.92931	0.00792079	0.0437349	1
SHAFFER_IRF4_TARGETS_IN_MYELOMA_VS_MATURE_B_LYMPHOCYTE	84	-0.176461	-1.92467	0.0158103	0.0447947	1
STEGER_ADIPOGENESIS_DN	22	-0.338439	-1.92315	0.00199203	0.0449376	1
SCHAEFFER_PROSTATE_DEVELOPMENT_12HR_DN	43	-0.244378	-1.9177	0.010395	0.0462736	1
SENESE_HDAC1_TARGETS_UP	356	-0.0885386	-1.91526	0.00612245	0.0466699	1
BASAKI_YBX1_TARGETS_DN	299	-0.0970352	-1.91365	0.00201613	0.0469421	1
SESTO_RESPONSE_TO_UV_C2	49	-0.224747	-1.91199	0.00422833	0.0470063	1
PASQUALUCCI_LYMPHOMA_BY_GC_STAGE_UP	239	-0.107737	-1.91217	0.00967118	0.0471307	1
KRIEG_KDM3A_TARGETS_NOT_HYPOXIA	160	-0.129534	-1.90974	0.0100402	0.0474385	1
FOSTER_KDM1A_TARGETS_UP	126	-0.146241	-1.9089	0.00782779	0.0474658	1
BROWN_MYELOID_CELL_DEVELOPMENT_UP	111	-0.156332	-1.90569	0.0116505	0.0479911	1
TONKS_TARGETS_OF_RUNX1_RUNX1T1_FUSION_HSC_UP	146	-0.134609	-1.90383	0.00984252	0.0480727	1
LENAOUR_DENDRITIC_CELL_MATURATION_DN	94	-0.164086	-1.90582	0.00630252	0.0481177	1
DEURIG_T_CELL_PROLYMPHOCYTIC_LEUKEMIA_DN	237	-0.105082	-1.90408	0.00610998	0.0481809	1
WINZEN_DEGRADED_VIA_KHSRP	69	-0.191561	-1.90262	0.00598802	0.0481936	1
WESTON_VEGFA_TARGETS_3HR	51	-0.223895	-1.90124	0.0118812	0.048358	1
CAIRO_HEPATOBLASTOMA_DN	153	-0.128722	-1.89991	0.0137255	0.048534	1
LANDIS_ERBB2_BREAST_PRENEOPLASTIC_DN	49	-0.230882	-1.89841	0.010395	0.0487353	1
GRYDER_PAX3FOXO1_ENHANCERS_KO_DOWN	379	-0.0847034	-1.89678	0.0101215	0.0487973	1
MELLMAN_TUT1_TARGETS_UP	18	-0.368308	-1.89719	0.0100402	0.0488841	1
LEE_DOUBLE_POLAR_THYMOCYTE	16	-0.391944	-1.89313	0.014	0.0495425	1
BRUECKNER_TARGETS_OF_MIRLET7A3_UP	84	-0.178578	-1.8905	0.0125	0.0501233	1
WAMUNYOKOLI_OVARIAN_CANCER_GRADES_1_2_UP	101	-0.1596	-1.88751	0.00976562	0.050587	1
MIYAGAWA_TARGETS_OF_EWSR1_ETS_FUSIONS_DN	181	-0.122324	-1.88814	0.00817996	0.0505981	1
JIANG_VHL_TARGETS	72	-0.193431	-1.88664	0.0202429	0.050627	1
QI_HYPOXIA	119	-0.147014	-1.87822	0.0115385	0.0518955	1
VERRECCHIA_RESPONSE_TO_TGFB1_C1	18	-0.366136	-1.88029	0.0139442	0.0520188	1
BARIS_THYROID_CANCER_UP	21	-0.343306	-1.87669	0.0137795	0.0520204	1
ZAMORA_NOS2_TARGETS_DN	61	-0.204511	-1.88086	0.00628931	0.0520379	1
LI_DCP2_BOUND_MRNA	78	-0.183371	-1.87833	0.0125	0.052048	1
JOHNSTONE_PARVB_TARGETS_1_DN	50	-0.223315	-1.88121	0.0136187	0.0520825	1
IIZUKA_LIVER_CANCER_PROGRESSION_L1_G1_UP	15	-0.389205	-1.87856	0.00592885	0.0521554	1
BASSO_B_LYMPHOCYTE_NETWORK	127	-0.143017	-1.87916	0.0135659	0.0521626	1
IVANOVA_HEMATOPOIESIS_LATE_PROGENITOR	406	-0.0823045	-1.87674	0.0039604	0.0521761	1
RAHMAN_TP53_TARGETS_PHOSPHORYLATED	19	-0.354283	-1.87516	0.0127119	0.0523842	1
VERNELL_RETINOBLASTOMA_PATHWAY_DN	15	-0.40313	-1.87343	0.00576923	0.0525838	1
HARRIS_HYPOXIA	64	-0.198016	-1.87387	0.013834	0.0526253	1
CAMPS_COLON_CANCER_COPY_NUMBER_DN	21	-0.335004	-1.87244	0.00784314	0.0526723	1
SANA_TNF_SIGNALING_DN	66	-0.187315	-1.87045	0.012024	0.0530984	1
PACHER_TARGETS_OF_IGF1_AND_IGF2_UP	30	-0.288886	-1.86867	0.0191083	0.0532776	1
DORSEY_GAB2_TARGETS	23	-0.327892	-1.86791	0.00392927	0.0533116	1
RICKMAN_METASTASIS_UP	281	-0.0974454	-1.86905	0.0102881	0.0533282	1
GOTTWEIN_TARGETS_OF_KSHV_MIR_K12_11	53	-0.217761	-1.86136	0.0203666	0.0549394	1
NUTT_GBM_VS_AO_GLIOMA_UP	42	-0.243426	-1.86072	0.01	0.0549912	1
MCBRYAN_PUBERTAL_BREAST_3_4WK_DN	27	-0.294864	-1.85883	0.00196464	0.0553651	1
JIANG_HYPOXIA_VIA_VHL	17	-0.374374	-1.85751	0.00829876	0.0553786	1
GABRIELY_MIR21_TARGETS	263	-0.100818	-1.85766	0.0063425	0.0555227	1
DAVICIONI_MOLECULAR_ARMS_VS_ERMS_UP	279	-0.0962135	-1.85527	0.0182186	0.0559153	1
HELLEBREKERS_SILENCED_DURING_TUMOR_ANGIOGENESIS	59	-0.203256	-1.85296	0.0149893	0.0560819	1
SMITH_TERT_TARGETS_DN	73	-0.183608	-1.85388	0.00996016	0.0561642	1
ZHENG_FOXP3_TARGETS_IN_THYMUS_UP	176	-0.123302	-1.85323	0.00948767	0.0561953	1
CAIRO_LIVER_DEVELOPMENT_UP	148	-0.125641	-1.85076	0.0103734	0.0566371	1
AMIT_EGF_RESPONSE_240_MCF10A	19	-0.350615	-1.8501	0.012	0.0567018	1
BOCHKIS_FOXA2_TARGETS	289	-0.0936334	-1.84403	0.0104603	0.0585342	1
HOFMANN_MYELODYSPLASTIC_SYNDROM_LOW_RISK_DN	18	-0.35919	-1.84288	0.0116732	0.0586886	1
MILI_PSEUDOPODIA	43	-0.234703	-1.84046	0.0159681	0.0592038	1
LEE_LIVER_CANCER_CIPROFIBRATE_DN	25	-0.304196	-1.83902	0.00616016	0.0595084	1
BERTUCCI_MEDULLARY_VS_DUCTAL_BREAST_CANCER_DN	146	-0.128034	-1.8369	0.00785855	0.0599814	1
FAELT_B_CLL_WITH_VH3_21_DN	42	-0.241154	-1.83579	0.0198413	0.0601222	1
CHIANG_LIVER_CANCER_SUBCLASS_PROLIFERATION_DN	82	-0.172331	-1.83484	0.00773694	0.0602433	1
GINESTIER_BREAST_CANCER_ZNF217_AMPLIFIED_UP	60	-0.203208	-1.83269	0.00582524	0.0607355	1
MARKEY_RB1_CHRONIC_LOF_DN	93	-0.161406	-1.83041	0.0102669	0.060909	1
BONOME_OVARIAN_CANCER_SURVIVAL_SUBOPTIMAL_DEBULKING	416	-0.079578	-1.83067	0.0136187	0.0610625	1
NAKAMURA_TUMOR_ZONE_PERIPHERAL_VS_CENTRAL_UP	230	-0.103084	-1.83081	0.0114943	0.0612243	1
VANHARANTA_UTERINE_FIBROID_WITH_7Q_DELETION_DN	34	-0.267106	-1.82812	0.014	0.0615406	1
WANG_METASTASIS_OF_BREAST_CANCER_ESR1_DN	21	-0.336973	-1.82741	0.0193424	0.0616322	1
NADLER_OBESITY_DN	35	-0.263103	-1.82418	0.0173745	0.0623761	1
BERENJENO_TRANSFORMED_BY_RHOA_FOREVER_UP	16	-0.376607	-1.8246	0.00961539	0.0624237	1
CHUNG_BLISTER_CYTOTOXICITY_UP	111	-0.147868	-1.82209	0.00635593	0.0628535	1
INGRAM_SHH_TARGETS_UP	94	-0.158065	-1.82085	0.00407332	0.0628771	1
ZHAN_MULTIPLE_MYELOMA_CD1_AND_CD2_DN	45	-0.226062	-1.8209	0.0120724	0.0630518	1
GAUSSMANN_MLL_AF4_FUSION_TARGETS_A_UP	158	-0.12265	-1.81648	0.00773694	0.0641344	1
KAAB_FAILED_HEART_VENTRICLE_DN	34	-0.266657	-1.81704	0.0114723	0.0641404	1
DORSAM_HOXA9_TARGETS_UP	33	-0.272498	-1.81465	0.0160321	0.0645703	1
LINDGREN_BLADDER_CANCER_CLUSTER_1_UP	101	-0.152818	-1.80862	0.0168067	0.0663656	1
POMEROY_MEDULLOBLASTOMA_DESMOPLASIC_VS_CLASSIC_DN	51	-0.21461	-1.80801	0.0175097	0.0664197	1
LIU_SOX4_TARGETS_UP	113	-0.146954	-1.80572	0.0142857	0.0669823	1
TONKS_TARGETS_OF_RUNX1_RUNX1T1_FUSION_MONOCYTE_UP	168	-0.120696	-1.80455	0.0182186	0.0672461	1
GAZDA_DIAMOND_BLACKFAN_ANEMIA_ERYTHROID_UP	21	-0.323286	-1.80294	0.0101833	0.0676065	1
MOLENAAR_TARGETS_OF_CCND1_AND_CDK4_UP	45	-0.225627	-1.79885	0.00594059	0.0688838	1
SHAFFER_IRF4_TARGETS_IN_ACTIVATED_B_LYMPHOCYTE	66	-0.189049	-1.7976	0.0171756	0.0691952	1
GARY_CD5_TARGETS_DN	394	-0.0798882	-1.79702	0.0137255	0.0692158	1
NIKOLSKY_BREAST_CANCER_8Q12_Q22_AMPLICON	91	-0.159011	-1.79631	0.0168067	0.0692828	1
LINDGREN_BLADDER_CANCER_CLUSTER_2A_DN	114	-0.13911	-1.79477	0.0195228	0.0696874	1
BURTON_ADIPOGENESIS_PEAK_AT_0HR	55	-0.207469	-1.79282	0.0152672	0.0701399	1
LIANG_HEMATOPOIESIS_STEM_CELL_NUMBER_SMALL_VS_HUGE_UP	27	-0.29095	-1.79226	0.0122449	0.0701743	1
ZHU_CMV_24_HR_DN	68	-0.182423	-1.79028	0.0220884	0.0707122	1
KINSEY_TARGETS_OF_EWSR1_FLII_FUSION_DN	270	-0.0936517	-1.7894	0.0103734	0.0708603	1
KYNG_WERNER_SYNDROM_AND_NORMAL_AGING_DN	151	-0.122279	-1.78841	0.0176125	0.0710857	1
CLASPER_LYMPHATIC_VESSELS_DURING_METASTASIS_UP	19	-0.340299	-1.78604	0.0139165	0.0717532	1
KIM_HYPOXIA	19	-0.339263	-1.78437	0.0280899	0.0721504	1
MCBRYAN_PUBERTAL_BREAST_6_7WK_DN	59	-0.1915	-1.77804	0.0239044	0.0742501	1
HUPER_BREAST_BASAL_VS_LUMINAL_UP	23	-0.307929	-1.7736	0.0234375	0.0758425	1
COWLING_MYCN_TARGETS	31	-0.269782	-1.76912	0.0209205	0.0763627	1
DITTMER_PTHLH_TARGETS_UP	100	-0.154134	-1.76922	0.0175781	0.0765401	1
VANOEVELEN_MYOGENESIS_SIN3A_TARGETS	196	-0.108272	-1.77139	0.013834	0.0765542	1
GAJATE_RESPONSE_TO_TRABECTEDIN_UP	49	-0.210827	-1.76927	0.0158416	0.076739	1
BRACHAT_RESPONSE_TO_CAMPTOTHECIN_DN	37	-0.246985	-1.76959	0.0220441	0.0768091	1
OHGUCHI_LIVER_HNF4A_TARGETS_UP	32	-0.267837	-1.76989	0.0204499	0.0769341	1
MOHANKUMAR_HOXA1_TARGETS_UP	352	-0.0815124	-1.76636	0.0245902	0.0770692	1
ABE_INNER_EAR	32	-0.261179	-1.76643	0.0153257	0.0772376	1
SILIGAN_TARGETS_OF_EWS_FLI1_FUSION_DN	15	-0.374855	-1.76537	0.0193798	0.0773064	1
LEIN_CHOROID_PLEXUS_MARKERS	73	-0.178084	-1.7631	0.00769231	0.0779971	1
DOUGLAS_BMI1_TARGETS_DN	276	-0.090522	-1.75753	0.0210084	0.0795686	1
TOMLINS_PROSTATE_CANCER_UP	35	-0.250973	-1.75768	0.0196078	0.0797304	1
MUNSHI_MULTIPLE_MYELOMA_UP	66	-0.181571	-1.758	0.0241935	0.0797967	1
GUO_HEX_TARGETS_DN	49	-0.212637	-1.75843	0.0138067	0.0798162	1
LEE_LIVER_CANCER_MYC_DN	32	-0.265264	-1.75253	0.01222	0.0814399	1
HARRIS_BRAIN_CANCER_PROGENITORS	35	-0.246885	-1.74825	0.0232068	0.0830053	1
HELLER_HDAC_TARGETS_SILENCED_BY_METHYLATION_UP	318	-0.0839216	-1.74687	0.0227743	0.0834075	1
VALK_AML_CLUSTER_8	21	-0.31997	-1.74534	0.0219124	0.0838118	1
ROSS_LEUKEMIA_WITH_MLL_FUSIONS	59	-0.193229	-1.74252	0.0179641	0.084322	1
MISSIAGLIA_REGULATED_BY_METHYLATION_UP	94	-0.151939	-1.74285	0.0217822	0.0844186	1
LEE_NEURAL_CREST_STEM_CELL_UP	120	-0.137076	-1.74327	0.0184805	0.0844951	1
LIN_MELANOMA_COPY_NUMBER_DN	34	-0.247601	-1.74023	0.0137795	0.0849179	1
WALLACE_PROSTATE_CANCER_RACE_DN	59	-0.188847	-1.74035	0.0151515	0.0850838	1
WOO_LIVER_CANCER_RECURRENCE_DN	43	-0.225187	-1.73615	0.0327553	0.0864976	1
HIRSCH_CELLULAR_TRANSFORMATION_SIGNATURE_DN	89	-0.160025	-1.73441	0.0235294	0.0868295	1
SASSON_RESPONSE_TO_FORSKOLIN_DN	75	-0.167682	-1.73474	0.0192308	0.0868986	1
DELPUECH_FOXO3_TARGETS_UP	51	-0.206463	-1.73039	0.0224949	0.0885188	1
BOQUEST_STEM_CELL_CULTURED_VS_FRESH_UP	334	-0.0840978	-1.72925	0.0454545	0.088808	1
WENDT_COHESIN_TARGETS_UP	30	-0.269411	-1.72864	0.0183673	0.0888173	1
ALONSO_METASTASIS_NEURAL_UP	16	-0.360991	-1.72781	0.0376984	0.0889731	1
LIEN_BREAST_CARCINOMA_METAPLASTIC	27	-0.273524	-1.72515	0.0162272	0.090058	1
MOHANKUMAR_HOXA1_TARGETS_DN	97	-0.151905	-1.72388	0.0214844	0.0904447	1
TAVOR_CEBPA_TARGETS_UP	35	-0.238829	-1.72285	0.0144033	0.0906712	1
FOURNIER_ACINAR_DEVELOPMENT_EARLY_UP	16	-0.353154	-1.71983	0.023622	0.0918556	1
JECHLINGER_EPITHELIAL_TO_MESENCHYMAL_TRANSITION_UP	55	-0.192049	-1.71628	0.0190275	0.0920412	1
KIM_WT1_TARGETS_12HR_UP	134	-0.127025	-1.71784	0.0301811	0.0920897	1
UEDA_PERIFERAL_CLOCK	133	-0.130547	-1.71642	0.0253906	0.0922114	1
RAO_BOUND_BY_SALL4_ISOFORM_B	390	-0.0764059	-1.71691	0.0230126	0.0922135	1
CROMER_METASTASIS_UP	65	-0.181421	-1.71809	0.0217391	0.09222	1
LEE_LIVER_CANCER_E2F1_UP	44	-0.213647	-1.71855	0.0353635	0.0922414	1
BOYAULT_LIVER_CANCER_SUBCLASS_G3_UP	176	-0.111647	-1.7124	0.027668	0.0937244	1
DOANE_BREAST_CANCER_CLASSES_UP	42	-0.222701	-1.70619	0.0303688	0.0959261	1
GAUSSMANN_MLL_AF4_FUSION_TARGETS_C_DN	16	-0.353509	-1.70673	0.0219124	0.0959594	1
ZHAN_MULTIPLE_MYELOMA_HP_UP	35	-0.23838	-1.70695	0.021611	0.0960854	1
WONG_PROTEASOME_GENE_MODULE	47	-0.217398	-1.70527	0.030888	0.0960878	1
COATES_MACROPHAGE_M1_VS_M2_UP	75	-0.171703	-1.70097	0.0192719	0.0981508	1
ACEVEDO_NORMAL_TISSUE_ADJACENT_TO_LIVER_TUMOR_UP	127	-0.129719	-1.69693	0.0318471	0.0999355	1
WIERENGA_STAT5A_TARGETS_GROUP2	36	-0.236177	-1.69407	0.0295858	0.101248	1
RUTELLA_RESPONSE_TO_CSF2RB_AND_IL4_DN	245	-0.0920954	-1.69121	0.0203666	0.102466	1
ZHANG_TARGETS_OF_EWSR1_FLI1_FUSION	74	-0.168985	-1.6883	0.0427184	0.103629	1
WANG_TUMOR_INVASIVENESS_DN	191	-0.104125	-1.6871	0.0283401	0.10395	1
KYNG_ENVIRONMENTAL_STRESS_RESPONSE_NOT_BY_UV_IN_OLD	18	-0.330255	-1.6838	0.023301	0.105375	1
PICCALUGA_ANGIOIMMUNOBLASTIC_LYMPHOMA_DN	119	-0.130243	-1.6815	0.0234375	0.106277	1
FARMER_BREAST_CANCER_APOCRINE_VS_BASAL	258	-0.0900814	-1.67811	0.0257937	0.107945	1
HOELZEL_NF1_TARGETS_DN	92	-0.147166	-1.67677	0.0247423	0.108124	1
AMIT_SERUM_RESPONSE_240_MCF10A	41	-0.222806	-1.67681	0.0377734	0.108368	1
YAO_TEMPORAL_RESPONSE_TO_PROGESTERONE_CLUSTER_11	85	-0.157096	-1.67229	0.0210325	0.110331	1
MOREAUX_MULTIPLE_MYELOMA_BY_TACI_DN	147	-0.119335	-1.66802	0.0336134	0.112512	1
HAHTOLA_MYCOSIS_FUNGOIDES_SKIN_UP	155	-0.117042	-1.66155	0.0342052	0.115803	1
SAKAI_CHRONIC_HEPATITIS_VS_LIVER_CANCER_UP	75	-0.165035	-1.65887	0.0395257	0.117096	1
WANG_SMARCE1_TARGETS_DN	301	-0.0824293	-1.65576	0.0457143	0.117567	1
BURTON_ADIPOGENESIS_9	75	-0.16209	-1.65657	0.0294118	0.117644	1
BEGUM_TARGETS_OF_PAX3_FOXO1_FUSION_UP	49	-0.197475	-1.6561	0.029703	0.11765	1
VECCHI_GASTRIC_CANCER_ADVANCED_VS_EARLY_DN	65	-0.173472	-1.65699	0.0252427	0.1177	1
STEARMAN_TUMOR_FIELD_EFFECT_UP	25	-0.271911	-1.65705	0.0363636	0.11796	1
GILDEA_METASTASIS	18	-0.321946	-1.65441	0.0430328	0.118116	1
GRADE_COLON_AND_RECTAL_CANCER_UP	256	-0.0885986	-1.65367	0.0374753	0.118254	1
SERVITJA_ISLET_HNF1A_TARGETS_UP	135	-0.124134	-1.65182	0.0417537	0.118727	1
HUANG_DASATINIB_RESISTANCE_UP	66	-0.176066	-1.65215	0.0488281	0.118813	1
LU_EZH2_TARGETS_DN	326	-0.0793104	-1.65103	0.0180723	0.118929	1
CUI_TCF21_TARGETS_UP	33	-0.239171	-1.64958	0.0383838	0.119516	1
MIKKELSEN_MEF_HCP_WITH_H3K27ME3	288	-0.0851316	-1.64896	0.0253165	0.119604	1
PETROVA_ENDOTHELIUM_LYMPHATIC_VS_BLOOD_DN	133	-0.122115	-1.64773	0.0231214	0.119802	1
KUMAR_TARGETS_OF_MLL_AF9_FUSION	279	-0.0849978	-1.64784	0.0333333	0.120023	1
ZHONG_SECRETOME_OF_LUNG_CANCER_AND_ENDOTHELIUM	57	-0.180498	-1.64619	0.029703	0.120369	1
SENESE_HDAC3_TARGETS_DN	427	-0.0679119	-1.64215	0.0309917	0.122416	1
HAHTOLA_MYCOSIS_FUNGOIDES_CD4_DN	103	-0.139627	-1.6402	0.0473118	0.123328	1
MIKKELSEN_IPS_ICP_WITH_H3K27ME3	33	-0.239464	-1.63468	0.0279441	0.126317	1
ZWANG_EGF_PERSISTENTLY_UP	23	-0.291244	-1.63384	0.0473251	0.12659	1
IKEDA_MIR133_TARGETS_UP	42	-0.210977	-1.63133	0.0301205	0.126937	1
BRUNO_HEMATOPOIESIS	51	-0.189039	-1.63155	0.043222	0.127079	1
STEARMAN_LUNG_CANCER_EARLY_VS_LATE_UP	111	-0.131691	-1.63175	0.0431211	0.127298	1
PUIFFE_INVASION_INHIBITED_BY_ASCITES_DN	126	-0.12528	-1.63216	0.0351967	0.127343	1
LEE_AGING_MUSCLE_DN	29	-0.258025	-1.62948	0.0357895	0.127781	1
SMID_BREAST_CANCER_BASAL_DN	477	-0.0641746	-1.62721	0.0387755	0.128958	1
ZHAN_MULTIPLE_MYELOMA_CD1_VS_CD2_DN	39	-0.220399	-1.62614	0.0458167	0.129329	1
GAUSSMANN_MLL_AF4_FUSION_TARGETS_D_UP	27	-0.259304	-1.62368	0.0433925	0.130232	1
IVANOVSKA_MIR106B_TARGETS	77	-0.159757	-1.62382	0.0376569	0.130424	1
DURCHDEWALD_SKIN_CARCINOGENESIS_DN	221	-0.0953593	-1.62076	0.0448065	0.131219	1
TURASHVILI_BREAST_DUCTAL_CARCINOMA_VS_DUCTAL_NORMAL_UP	39	-0.218857	-1.6196	0.0366089	0.131371	1
ODONNELL_TARGETS_OF_MYC_AND_TFRC_UP	51	-0.192977	-1.62089	0.0350195	0.131449	1
SMID_BREAST_CANCER_LUMINAL_B_DN	323	-0.0812443	-1.62129	0.0345528	0.131498	1
TURASHVILI_BREAST_LOBULAR_CARCINOMA_VS_LOBULAR_NORMAL_UP	68	-0.166925	-1.6197	0.0384615	0.131599	1
PECE_MAMMARY_STEM_CELL_DN	124	-0.127881	-1.61131	0.0460405	0.136271	1
VERRECCHIA_RESPONSE_TO_TGFB1_C2	20	-0.305456	-1.6094	0.0327198	0.137222	1
RAMALHO_STEMNESS_DN	56	-0.180756	-1.60549	0.038	0.139611	1
HUANG_FOXA2_TARGETS_DN	24	-0.275479	-1.60371	0.0402414	0.140184	1
GROSS_HYPOXIA_VIA_HIF1A_DN	91	-0.141533	-1.604	0.0264766	0.140299	1
KAN_RESPONSE_TO_ARSENIC_TRIOXIDE	91	-0.144158	-1.6009	0.0413386	0.141547	1
KYNG_RESPONSE_TO_H2O2	59	-0.177244	-1.60011	0.0474227	0.141765	1
LUI_THYROID_CANCER_CLUSTER_3	25	-0.270507	-1.59869	0.0625	0.141789	1
WILSON_PROTEASES_AT_TUMOR_BONE_INTERFACE_UP	19	-0.30382	-1.59952	0.0460922	0.141802	1
GAUSSMANN_MLL_AF4_FUSION_TARGETS_F_DN	21	-0.292795	-1.60094	0.0483871	0.141827	1
MCCABE_HOXC6_TARGETS_CANCER_DN	18	-0.312288	-1.59886	0.037037	0.141993	1
MCBRYAN_PUBERTAL_BREAST_5_6WK_UP	91	-0.142551	-1.59706	0.0415842	0.142507	1
YAO_TEMPORAL_RESPONSE_TO_PROGESTERONE_CLUSTER_14	130	-0.116867	-1.59619	0.0492126	0.142787	1
WOOD_EBV_EBNA1_TARGETS_DN	37	-0.224069	-1.59544	0.0452756	0.142944	1
YAO_TEMPORAL_RESPONSE_TO_PROGESTERONE_CLUSTER_16	61	-0.176507	-1.59407	0.0458015	0.14356	1
ACEVEDO_LIVER_CANCER_WITH_H3K9ME3_UP	68	-0.167699	-1.58835	0.0469667	0.146207	1
FARMER_BREAST_CANCER_BASAL_VS_LULMINAL	247	-0.085566	-1.58852	0.0516129	0.146409	1
NAKAMURA_ADIPOGENESIS_LATE_UP	86	-0.146871	-1.58937	0.0528455	0.146433	1
GERHOLD_ADIPOGENESIS_DN	48	-0.194051	-1.58876	0.045738	0.146539	1
CONCANNON_APOPTOSIS_BY_EPOXOMICIN_UP	197	-0.0970784	-1.58689	0.0364372	0.146855	1
PROVENZANI_METASTASIS_UP	157	-0.111697	-1.58555	0.0503018	0.147125	1
MCCLUNG_DELTA_FOSB_TARGETS_2WK	39	-0.213856	-1.58574	0.0491159	0.147275	1
TOMIDA_METASTASIS_UP	20	-0.294372	-1.58462	0.047081	0.147413	1
LIU_CMYB_TARGETS_UP	126	-0.122013	-1.58408	0.030426	0.147438	1
LIU_VMYB_TARGETS_UP	106	-0.129681	-1.57959	0.0675944	0.150269	1
MAYBURD_RESPONSE_TO_L663536_DN	46	-0.19618	-1.57891	0.0505263	0.150432	1
MORI_PRE_BI_LYMPHOCYTE_DN	64	-0.167811	-1.57787	0.0490798	0.150883	1
ZHENG_BOUND_BY_FOXP3	390	-0.0693982	-1.57417	0.0367347	0.151526	1
OISHI_CHOLANGIOMA_STEM_CELL_LIKE_UP	270	-0.083631	-1.57499	0.039604	0.151588	1
SAMOLS_TARGETS_OF_KHSV_MIRNAS_DN	44	-0.207374	-1.57574	0.0489362	0.151656	1
GERY_CEBP_TARGETS	95	-0.141782	-1.5744	0.0614754	0.151662	1
CHESLER_BRAIN_QTL_CIS	64	-0.170752	-1.57615	0.041502	0.151675	1
MITSIADES_RESPONSE_TO_APLIDIN_UP	337	-0.0734043	-1.57511	0.0504032	0.151815	1
PELLICCIOTTA_HDAC_IN_ANTIGEN_PRESENTATION_DN	45	-0.198197	-1.57282	0.0595745	0.152167	1
TONKS_TARGETS_OF_RUNX1_RUNX1T1_FUSION_ERYTHROCYTE_UP	112	-0.124256	-1.57078	0.0623742	0.153297	1
KAYO_AGING_MUSCLE_DN	93	-0.136681	-1.56841	0.0374753	0.154602	1
MIKKELSEN_MCV6_HCP_WITH_H3K27ME3	258	-0.0824897	-1.56664	0.0545809	0.155533	1
NIKOLSKY_BREAST_CANCER_8P12_P11_AMPLICON	38	-0.217438	-1.56597	0.0472441	0.155704	1
BRACHAT_RESPONSE_TO_METHOTREXATE_DN	23	-0.27533	-1.56349	0.0394191	0.157142	1
TURASHVILI_BREAST_DUCTAL_CARCINOMA_VS_LOBULAR_NORMAL_UP	67	-0.165564	-1.56159	0.0528455	0.158122	1
ZHONG_RESPONSE_TO_AZACITIDINE_AND_TSA_UP	133	-0.116911	-1.56104	0.0526316	0.158209	1
DAVICIONI_PAX_FOXO1_SIGNATURE_IN_ARMS_UP	50	-0.189127	-1.55964	0.0560166	0.158603	1
ALCALA_APOPTOSIS	73	-0.156253	-1.55984	0.0610687	0.158784	1
ELVIDGE_HYPOXIA_BY_DMOG_UP	105	-0.127974	-1.55756	0.0511247	0.159794	1
RODWELL_AGING_KIDNEY_DN	113	-0.12748	-1.55624	0.0488281	0.160137	1
SCHAEFFER_PROSTATE_DEVELOPMENT_48HR_DN	335	-0.0738422	-1.55647	0.0421687	0.160282	1
COLIN_PILOCYTIC_ASTROCYTOMA_VS_GLIOBLASTOMA_DN	25	-0.254491	-1.55517	0.0617761	0.16055	1
NAKAJIMA_MAST_CELL	29	-0.243929	-1.55192	0.0435644	0.162682	1
KYNG_ENVIRONMENTAL_STRESS_RESPONSE_NOT_BY_4NQO_IN_WS	28	-0.247194	-1.54986	0.0590631	0.163974	1
PAL_PRMT5_TARGETS_DN	18	-0.306368	-1.54876	0.054902	0.164445	1
WANG_LSD1_TARGETS_DN	31	-0.233311	-1.547	0.0611814	0.165098	1
BOYAULT_LIVER_CANCER_SUBCLASS_G123_DN	34	-0.222371	-1.54742	0.0635593	0.16512	1
BOQUEST_STEM_CELL_CULTURED_VS_FRESH_DN	17	-0.310928	-1.54599	0.05625	0.165576	1
RUTELLA_RESPONSE_TO_CSF2RB_AND_IL4_UP	273	-0.080633	-1.54529	0.054326	0.165785	1
AKL_HTLV1_INFECTION_UP	24	-0.259844	-1.54364	0.057971	0.165811	1
WANG_BARRETTS_ESOPHAGUS_UP	31	-0.230544	-1.54385	0.0433884	0.165949	1
MAHAJAN_RESPONSE_TO_IL1A_UP	52	-0.180027	-1.54404	0.0439122	0.166118	1
GAUSSMANN_MLL_AF4_FUSION_TARGETS_A_DN	64	-0.164255	-1.54434	0.0626263	0.166225	1
PILON_KLF1_TARGETS_UP	372	-0.0690193	-1.54263	0.0546218	0.166276	1
JOHANSSON_GLIOMAGENESIS_BY_PDGFB_UP	52	-0.181977	-1.54165	0.0538462	0.166698	1
JAEGER_METASTASIS_DN	126	-0.116715	-1.53836	0.0681363	0.16892	1
ZHU_CMV_ALL_DN	96	-0.13652	-1.53591	0.0591716	0.169516	1
FIGUEROA_AML_METHYLATION_CLUSTER_1_UP	84	-0.140208	-1.53624	0.0590476	0.169567	1
IKEDA_MIR1_TARGETS_UP	54	-0.180187	-1.53639	0.0688976	0.169772	1
PEDERSEN_TARGETS_OF_611CTF_ISOFORM_OF_ERBB2	48	-0.186964	-1.53519	0.04375	0.169789	1
NAKAMURA_ADIPOGENESIS_LATE_DN	29	-0.235005	-1.53673	0.0600775	0.169874	1
HAHTOLA_SEZARY_SYNDROM_UP	70	-0.153337	-1.53357	0.0568182	0.170485	1
OUILLETTE_CLL_13Q14_DELETION_UP	53	-0.184499	-1.53372	0.0579151	0.170704	1
LANDIS_ERBB2_BREAST_TUMORS_324_UP	125	-0.118466	-1.53229	0.0502008	0.170836	1
BURTON_ADIPOGENESIS_7	39	-0.20329	-1.53261	0.0603622	0.1709	1
SMID_BREAST_CANCER_LUMINAL_A_UP	45	-0.192317	-1.52954	0.0759494	0.17229	1
WAGNER_APO2_SENSITIVITY	18	-0.301877	-1.52986	0.0584551	0.17236	1
GUILLAUMOND_KLF10_TARGETS_DN	23	-0.265781	-1.52766	0.0725806	0.173433	1
BAE_BRCA1_TARGETS_DN	29	-0.234391	-1.52677	0.0489796	0.173841	1
BECKER_TAMOXIFEN_RESISTANCE_DN	39	-0.205772	-1.52452	0.0666667	0.174637	1
ZHAN_MULTIPLE_MYELOMA_MF_DN	35	-0.215229	-1.52466	0.06	0.174859	1
SENESE_HDAC2_TARGETS_DN	93	-0.134336	-1.52498	0.062249	0.174949	1
TERAMOTO_OPN_TARGETS_CLUSTER_6	23	-0.267973	-1.52317	0.0766045	0.175341	1
BECKER_TAMOXIFEN_RESISTANCE_UP	39	-0.208821	-1.52249	0.0705394	0.175561	1
TAKAO_RESPONSE_TO_UVB_RADIATION_DN	89	-0.138142	-1.5205	0.0731707	0.176736	1
IIZUKA_LIVER_CANCER_PROGRESSION_G2_G3_UP	21	-0.278634	-1.51577	0.0661157	0.180251	1
KOHOUTEK_CCNT1_TARGETS	35	-0.215648	-1.51309	0.0659794	0.182154	1
MULLIGHAN_MLL_SIGNATURE_2_DN	208	-0.0896624	-1.51238	0.0687623	0.182362	1
SHEPARD_BMYB_MORPHOLINO_UP	169	-0.09908	-1.50953	0.0706107	0.18443	1
HOEBEKE_LYMPHOID_STEM_CELL_DN	73	-0.150997	-1.50751	0.0708502	0.185689	1
YAO_TEMPORAL_RESPONSE_TO_PROGESTERONE_CLUSTER_9	58	-0.168146	-1.50583	0.0758483	0.186787	1
CHIANG_LIVER_CANCER_SUBCLASS_CTNNB1_DN	122	-0.114714	-1.50542	0.0634921	0.186819	1
MCDOWELL_ACUTE_LUNG_INJURY_DN	34	-0.222465	-1.5042	0.061753	0.187488	1
MORI_SMALL_PRE_BII_LYMPHOCYTE_UP	61	-0.159412	-1.50308	0.0648855	0.188095	1
FEVR_CTNNB1_TARGETS_UP	490	-0.0601283	-1.50029	0.062753	0.190011	1
DEBIASI_APOPTOSIS_BY_REOVIRUS_INFECTION_UP	239	-0.0850471	-1.49873	0.0647773	0.190603	1
TCGA_GLIOBLASTOMA_COPY_NUMBER_DN	25	-0.248933	-1.49884	0.0656064	0.190864	1
KYNG_DNA_DAMAGE_BY_GAMMA_RADIATION	55	-0.170967	-1.49795	0.0662393	0.190885	1
SCHAEFFER_PROSTATE_DEVELOPMENT_12HR_UP	91	-0.135333	-1.49736	0.0685484	0.191081	1
ZHOU_INFLAMMATORY_RESPONSE_LIVE_DN	281	-0.0785049	-1.49661	0.059448	0.191397	1
GROSS_HYPOXIA_VIA_ELK3_AND_HIF1A_UP	127	-0.113042	-1.49342	0.0846457	0.193756	1
MALONEY_RESPONSE_TO_17AAG_UP	34	-0.217762	-1.49228	0.0880503	0.194415	1
WATANABE_RECTAL_CANCER_RADIOTHERAPY_RESPONSIVE_UP	87	-0.138775	-1.49091	0.0772443	0.195288	1
JOSEPH_RESPONSE_TO_SODIUM_BUTYRATE_DN	45	-0.18607	-1.48915	0.0744275	0.196138	1
CHEN_LUNG_CANCER_SURVIVAL	19	-0.290103	-1.48938	0.0677291	0.196299	1
HERNANDEZ_ABERRANT_MITOSIS_BY_DOCETACEL_2NM_DN	20	-0.276632	-1.48765	0.0727273	0.196745	1
GNATENKO_PLATELET_SIGNATURE	33	-0.212384	-1.48787	0.0886076	0.196877	1
ALFANO_MYC_TARGETS	211	-0.0899694	-1.48569	0.0582707	0.197267	1
VANHARANTA_UTERINE_FIBROID_UP	38	-0.200308	-1.48585	0.0674603	0.197484	1
ZHAN_MULTIPLE_MYELOMA_DN	27	-0.237135	-1.48586	0.079922	0.197829	1
TAKEDA_TARGETS_OF_NUP98_HOXA9_FUSION_6HR_UP	53	-0.170452	-1.4828	0.0679612	0.199363	1
DAZARD_RESPONSE_TO_UV_NHEK_UP	149	-0.103617	-1.47903	0.0712871	0.202437	1
NIKOLSKY_BREAST_CANCER_6P24_P22_AMPLICON	21	-0.267789	-1.47853	0.0826613	0.202488	1
OSMAN_BLADDER_CANCER_UP	354	-0.0686473	-1.4767	0.0647773	0.20377	1
ZHENG_IL22_SIGNALING_UP	30	-0.23028	-1.4763	0.0981211	0.203789	1
CHEBOTAEV_GR_TARGETS_UP	63	-0.157196	-1.47547	0.0828157	0.204135	1
DURAND_STROMA_NS_UP	121	-0.111824	-1.47118	0.0678643	0.207409	1
WANG_IMMORTALIZED_BY_HOXA9_AND_MEIS1_DN	19	-0.281444	-1.46951	0.0789474	0.208508	1
BREDEMEYER_RAG_SIGNALING_NOT_VIA_ATM_UP	47	-0.179135	-1.46906	0.0831643	0.208553	1
LIM_MAMMARY_LUMINAL_MATURE_DN	86	-0.132086	-1.46693	0.0882957	0.210158	1
ONGUSAHA_TP53_TARGETS	28	-0.229982	-1.46454	0.0798319	0.211299	1
PANGAS_TUMOR_SUPPRESSION_BY_SMAD1_AND_SMAD5_UP	110	-0.119051	-1.46469	0.0807087	0.211546	1
HAHTOLA_MYCOSIS_FUNGOIDES_CD4_UP	43	-0.188033	-1.46362	0.0958333	0.211818	1
LEE_LIVER_CANCER_MYC_UP	42	-0.191238	-1.46479	0.0868687	0.211827	1
GAVIN_FOXP3_TARGETS_CLUSTER_P3	124	-0.112926	-1.46294	0.100823	0.212051	1
GRYDER_PAX3FOXO1_TOP_ENHANCERS	394	-0.0648463	-1.46171	0.0869565	0.212832	1
LOPEZ_MBD_TARGETS_IMPRINTED_AND_X_LINKED	16	-0.305762	-1.46079	0.0770791	0.212962	1
VERHAAK_AML_WITH_NPM1_MUTATED_DN	175	-0.0957567	-1.46108	0.0896686	0.213011	1
TONKS_TARGETS_OF_RUNX1_RUNX1T1_FUSION_SUSTAINDED_IN_ERYTHROCYTE_UP	32	-0.216182	-1.45815	0.0826613	0.215038	1
ROVERSI_GLIOMA_LOH_REGIONS	32	-0.218303	-1.45599	0.0805785	0.215918	1
KIM_ALL_DISORDERS_OLIGODENDROCYTE_NUMBER_CORR_DN	19	-0.278107	-1.45679	0.0767717	0.215948	1
PECE_MAMMARY_STEM_CELL_UP	101	-0.12626	-1.45605	0.0761523	0.216246	1
STARK_HYPPOCAMPUS_22Q11_DELETION_UP	47	-0.183629	-1.45092	0.0888889	0.220383	1
HOLLEMAN_ASPARAGINASE_RESISTANCE_B_ALL_UP	22	-0.257631	-1.44867	0.0918164	0.222201	1
RODRIGUES_THYROID_CARCINOMA_ANAPLASTIC_DN	432	-0.062171	-1.44737	0.0935551	0.223101	1
RAMPON_ENRICHED_LEARNING_ENVIRONMENT_LATE_UP	21	-0.262628	-1.44632	0.0879346	0.22374	1
GARGALOVIC_RESPONSE_TO_OXIDIZED_PHOSPHOLIPIDS_PINK_DN	24	-0.251752	-1.44564	0.0826271	0.223996	1
GARGALOVIC_RESPONSE_TO_OXIDIZED_PHOSPHOLIPIDS_TURQUOISE_UP	69	-0.146802	-1.445	0.0783898	0.224275	1
JAATINEN_HEMATOPOIETIC_STEM_CELL_UP	247	-0.0787342	-1.44383	0.09	0.224949	1
GAJATE_RESPONSE_TO_TRABECTEDIN_DN	15	-0.310073	-1.44336	0.0828402	0.225049	1
MCCABE_HOXC6_TARGETS_DN	19	-0.28035	-1.43847	0.0966469	0.229459	1
ZHENG_GLIOBLASTOMA_PLASTICITY_DN	53	-0.167005	-1.43655	0.0936255	0.230554	1
WANG_RECURRENT_LIVER_CANCER_UP	18	-0.282854	-1.43672	0.0903614	0.230791	1
CHNG_MULTIPLE_MYELOMA_HYPERPLOID_DN	27	-0.238668	-1.43457	0.0945378	0.232138	1
JIANG_AGING_CEREBRAL_CORTEX_UP	29	-0.220522	-1.43082	0.107143	0.235466	1
PROVENZANI_METASTASIS_DN	111	-0.116814	-1.43012	0.0957031	0.23574	1
WANG_RESPONSE_TO_BEXAROTENE_DN	19	-0.268212	-1.42623	0.10766	0.238161	1
ZHAN_MULTIPLE_MYELOMA_CD1_AND_CD2_UP	70	-0.147842	-1.42623	0.0895238	0.238543	1
GAVIN_FOXP3_TARGETS_CLUSTER_P7	71	-0.144059	-1.42655	0.0929293	0.238612	1
WESTON_VEGFA_TARGETS_12HR	20	-0.268727	-1.42658	0.104628	0.238974	1
ROZANOV_MMP14_TARGETS_DN	26	-0.236484	-1.42376	0.100394	0.23955	1
FALVELLA_SMOKERS_WITH_LUNG_CANCER	59	-0.15461	-1.42413	0.0983936	0.239568	1
VARELA_ZMPSTE24_TARGETS_DN	19	-0.274489	-1.42446	0.114625	0.23959	1
PEPPER_CHRONIC_LYMPHOCYTIC_LEUKEMIA_UP	16	-0.295897	-1.42037	0.0798319	0.242474	1
LEE_LIVER_CANCER_DENA_DN	33	-0.20731	-1.41968	0.0854871	0.242831	1
NIKOLSKY_BREAST_CANCER_7Q21_Q22_AMPLICON	49	-0.172056	-1.41837	0.083004	0.243825	1
HOSHIDA_LIVER_CANCER_SUBCLASS_S1	195	-0.0881001	-1.41576	0.0992366	0.246023	1
SARRIO_EPITHELIAL_MESENCHYMAL_TRANSITION_DN	105	-0.117748	-1.41479	0.115385	0.246642	1
CHEN_LVAD_SUPPORT_OF_FAILING_HEART_UP	74	-0.14263	-1.41368	0.0942623	0.247337	1
FLECHNER_PBL_KIDNEY_TRANSPLANT_OK_VS_DONOR_UP	132	-0.105249	-1.4132	0.102669	0.247395	1
BRUINS_UVC_RESPONSE_VIA_TP53_GROUP_B	399	-0.0618788	-1.41244	0.102616	0.247752	1
GROSS_ELK3_TARGETS_DN	25	-0.233557	-1.41103	0.121901	0.248343	1
EPPERT_PROGENITOR	121	-0.111274	-1.41127	0.0901804	0.248497	1
SCHUHMACHER_MYC_TARGETS_UP	74	-0.138816	-1.40949	0.104839	0.249074	1
ELVIDGE_HIF1A_AND_HIF2A_TARGETS_DN	83	-0.131265	-1.40969	0.10101	0.249241	1
SMID_BREAST_CANCER_RELAPSE_IN_BONE_DN	197	-0.0863922	-1.40824	0.10352	0.24957	1
TING_SILENCED_BY_DICER	17	-0.284916	-1.40854	0.106212	0.249703	1
EHLERS_ANEUPLOIDY_UP	33	-0.210787	-1.40587	0.10124	0.249981	1

## Sheet: bp c5
Positively enriched in NEL-CRE
NAME	SIZE	ES	NES	NOM p-val	FDR q-val	FWER p-val
GO_DNA_REPLICATION	233	0.232175	4.13983	0	0	0
GO_DNA_REPAIR	462	0.16811	4.131	0	0	0
GO_DNA_CONFORMATION_CHANGE	215	0.23958	3.97627	0	0	0
GO_REGULATION_OF_GENE_EXPRESSION_EPIGENETIC	252	0.199561	3.75251	0	0	0
GO_DNA_RECOMBINATION	210	0.22076	3.71816	0	0	0
GO_DNA_DEPENDENT_DNA_REPLICATION	131	0.269871	3.70449	0	0	0
GO_ORGANELLE_FISSION	345	0.163672	3.55571	0	0	0
GO_DOUBLE_STRAND_BREAK_REPAIR	199	0.217883	3.55473	0	0	0
GO_CELL_CYCLE_DNA_REPLICATION	59	0.378886	3.44822	0	0	0
GO_DNA_PACKAGING	113	0.280341	3.41781	0	0	0
GO_COVALENT_CHROMATIN_MODIFICATION	389	0.151169	3.40426	0	0	0
GO_PEPTIDYL_LYSINE_MODIFICATION	324	0.160357	3.36386	0	0	0
GO_CELL_DIVISION	487	0.13381	3.33941	0	0	0
GO_RECOMBINATIONAL_REPAIR	114	0.262136	3.29311	0	0	0
GO_MEIOSIS_I_CELL_CYCLE_PROCESS	64	0.349248	3.27427	0	0	0
GO_CHROMOSOME_SEGREGATION	255	0.171613	3.19436	0	0	0
GO_PEPTIDYL_LYSINE_METHYLATION	96	0.273019	3.15775	0	0.00010435	0.002
GO_MITOTIC_NUCLEAR_DIVISION	230	0.177792	3.09851	0	0.000194686	0.004
GO_REGIONALIZATION	217	0.182082	3.07076	0	0.00018444	0.004
GO_NEGATIVE_REGULATION_OF_GENE_EXPRESSION_EPIGENETIC	74	0.297873	3.06261	0	0.000175218	0.004
GO_LYMPHOCYTE_DIFFERENTIATION	237	0.167196	3.02989	0	0.000251743	0.006
GO_MICROTUBULE_CYTOSKELETON_ORGANIZATION	458	0.124475	3.00219	0	0.000321095	0.008
GO_HISTONE_METHYLATION	108	0.243114	2.98498	0	0.000344889	0.009
GO_PATTERN_SPECIFICATION_PROCESS	277	0.157418	2.93009	0	0.000514168	0.014
GO_ANTERIOR_POSTERIOR_PATTERN_SPECIFICATION	123	0.224697	2.928	0	0.000493601	0.014
GO_REGULATION_OF_CHROMOSOME_ORGANIZATION	286	0.150611	2.92369	0	0.000474616	0.014
GO_REGULATION_OF_CHROMATIN_ORGANIZATION	145	0.202503	2.87966	0	0.000620438	0.019
GO_HISTONE_H3_K9_METHYLATION	32	0.414112	2.87497	0	0.000630287	0.02
GO_MEIOTIC_CELL_CYCLE_PROCESS	108	0.234306	2.87296	0	0.000608553	0.02
GO_ADAPTIVE_IMMUNE_RESPONSE	204	0.168292	2.85296	0	0.000735468	0.025
GO_CELL_FATE_COMMITMENT	146	0.200038	2.85038	0	0.000711743	0.025
GO_NUCLEAR_CHROMOSOME_SEGREGATION	201	0.173822	2.84449	0	0.000689501	0.025
GO_HISTONE_H3_K9_MODIFICATION	40	0.379324	2.83432	0	0.000695192	0.026
GO_MEIOTIC_CELL_CYCLE	142	0.204723	2.82715	0	0.000727021	0.028
GO_PROTEIN_METHYLATION	137	0.201788	2.82103	0	0.00073113	0.029
GO_G0_TO_G1_TRANSITION	40	0.372283	2.80921	0	0.000759268	0.031
GO_EMBRYONIC_ORGAN_DEVELOPMENT	292	0.143984	2.80661	0	0.000787042	0.033
GO_CHROMATIN_REMODELING	134	0.206485	2.80559	0	0.000789015	0.034
GO_MACROMOLECULE_METHYLATION	231	0.159116	2.80222	0	0.000768784	0.034
GO_GENE_SILENCING	195	0.172634	2.80096	0	0.000749564	0.034
GO_CELL_CYCLE_CHECKPOINT	190	0.174956	2.78888	0	0.000796368	0.037
GO_LYMPHOCYTE_ACTIVATION	434	0.115019	2.75226	0	0.000965877	0.046
GO_METHYLATION	269	0.149198	2.74901	0	0.000943415	0.046
GO_HOMOLOGOUS_RECOMBINATION	33	0.399225	2.74717	0	0.00094233	0.046
GO_REGULATION_OF_MRNA_PROCESSING	126	0.212125	2.74215	0	0.000980264	0.049
GO_NEGATIVE_REGULATION_OF_CHROMOSOME_ORGANIZATION	115	0.216969	2.72454	0	0.0010724	0.055
GO_REGULATION_OF_DOUBLE_STRAND_BREAK_REPAIR	62	0.297639	2.71979	0	0.001068	0.056
GO_DNA_REPLICATION_INDEPENDENT_NUCLEOSOME_ORGANIZATION	35	0.382704	2.7087	0	0.00111898	0.06
GO_REGULATION_OF_EPITHELIAL_TUBE_FORMATION	16	0.569056	2.7019	0	0.00111402	0.061
GO_B_CELL_ACTIVATION	164	0.18302	2.70161	0	0.00109174	0.061
GO_TUBE_FORMATION	122	0.212057	2.68691	0	0.00119059	0.068
GO_CHROMOSOME_ORGANIZATION_INVOLVED_IN_MEIOTIC_CELL_CYCLE	35	0.382225	2.6854	0	0.00116769	0.068
GO_NEGATIVE_REGULATION_OF_OSTEOBLAST_DIFFERENTIATION	31	0.394118	2.65365	0	0.00144309	0.084
GO_DNA_INTEGRITY_CHECKPOINT	138	0.194811	2.62554	0	0.00170846	0.101
GO_LYMPHOCYTE_ACTIVATION_INVOLVED_IN_IMMUNE_RESPONSE	111	0.213031	2.61528	0	0.00178897	0.108
GO_MEIOTIC_CHROMOSOME_SEGREGATION	49	0.31653	2.60777	0	0.00183475	0.112
GO_REGULATION_OF_RNA_SPLICING	122	0.205687	2.58871	0	0.00221894	0.135
GO_EPITHELIAL_TUBE_MORPHOGENESIS	252	0.143075	2.58549	0	0.0022261	0.137
GO_REGULATION_OF_DNA_RECOMBINATION	69	0.268797	2.58358	0	0.0022483	0.141
GO_MORPHOGENESIS_OF_EMBRYONIC_EPITHELIUM	123	0.197266	2.58004	0	0.0022996	0.147
GO_MITOTIC_CELL_CYCLE_CHECKPOINT	146	0.184783	2.56404	0	0.00260794	0.166
GO_DNA_DEPENDENT_DNA_REPLICATION_MAINTENANCE_OF_FIDELITY	34	0.375086	2.5627	0	0.00265121	0.172
GO_REGULATION_OF_DNA_METABOLIC_PROCESS	269	0.135559	2.55901	0	0.002664	0.176
GO_TUBE_CLOSURE	83	0.240269	2.55136	0	0.00275952	0.185
GO_EPITHELIAL_TUBE_FORMATION	110	0.2084	2.54537	0	0.00285257	0.192
GO_CHROMATIN_ASSEMBLY_OR_DISASSEMBLY	101	0.217317	2.53867	0.00193424	0.00295708	0.2
GO_REGULATION_OF_CHROMATIN_SILENCING	21	0.46719	2.51182	0	0.00342336	0.229
GO_POSITIVE_REGULATION_OF_TRANSCRIPTION_OF_NOTCH_RECEPTOR_TARGET	18	0.500499	2.50998	0	0.00342445	0.232
GO_DNA_SYNTHESIS_INVOLVED_IN_DNA_REPAIR	43	0.321489	2.50286	0	0.00356639	0.243
GO_CHROMOSOME_SEPARATION	77	0.239099	2.48322	0	0.00404234	0.277
GO_CHROMATIN_ASSEMBLY	79	0.237255	2.47761	0	0.00412124	0.285
GO_DNA_STRAND_ELONGATION	22	0.434611	2.4772	0	0.004064	0.285
GO_DNA_STRAND_ELONGATION_INVOLVED_IN_DNA_REPLICATION	17	0.479961	2.47467	0	0.00405653	0.289
GO_CHROMOSOME_CONDENSATION	29	0.387607	2.46631	0	0.00421425	0.298
GO_TELOMERE_ORGANIZATION	135	0.180533	2.46055	0	0.00434567	0.31
GO_CENTROMERE_COMPLEX_ASSEMBLY	37	0.339079	2.45916	0	0.00431153	0.311
GO_TRANSLESION_SYNTHESIS	37	0.341513	2.45332	0	0.00446218	0.323
GO_T_CELL_ACTIVATION_INVOLVED_IN_IMMUNE_RESPONSE	59	0.265	2.44981	0	0.00454043	0.329
GO_CHROMATIN_REMODELING_AT_CENTROMERE	29	0.379971	2.44833	0	0.00452813	0.332
GO_NEGATIVE_REGULATION_OF_MRNA_METABOLIC_PROCESS	69	0.250802	2.43639	0.00201613	0.00497683	0.37
GO_SIGNAL_TRANSDUCTION_BY_P53_CLASS_MEDIATOR	231	0.137748	2.43208	0	0.0050993	0.378
GO_NEGATIVE_REGULATION_OF_CELL_CYCLE_PROCESS	281	0.127613	2.42313	0	0.0054233	0.395
GO_BASE_EXCISION_REPAIR	41	0.320305	2.4128	0	0.00579222	0.422
GO_MITOTIC_RECOMBINATION	19	0.467485	2.40923	0	0.00598476	0.434
GO_REGULATION_OF_DNA_REPAIR	101	0.210269	2.40662	0	0.00607954	0.444
GO_MUSCLE_ORGAN_DEVELOPMENT	262	0.126773	2.40236	0	0.00618173	0.455
GO_TELOMERE_MAINTENANCE_VIA_SEMI_CONSERVATIVE_REPLICATION	27	0.382382	2.39721	0	0.00635137	0.47
GO_MITOTIC_SISTER_CHROMATID_SEGREGATION	135	0.177982	2.38367	0.0040404	0.00707674	0.513
GO_HISTONE_EXCHANGE	38	0.31722	2.36432	0.00196464	0.00817236	0.575
GO_SPINDLE_ORGANIZATION	146	0.16586	2.35797	0	0.00843213	0.586
GO_POSITIVE_REGULATION_OF_MESENCHYMAL_CELL_PROLIFERATION	19	0.452832	2.33839	0	0.0094568	0.632
GO_DNA_GEOMETRIC_CHANGE	103	0.196994	2.33655	0	0.00952568	0.638
GO_HISTONE_PHOSPHORYLATION	31	0.351516	2.33598	0	0.00947045	0.641
GO_REGULATION_OF_MRNA_METABOLIC_PROCESS	285	0.122791	2.33558	0	0.00939797	0.642
GO_MRNA_TRANSPORT	135	0.169522	2.33439	0.00198807	0.00937311	0.646
GO_MEIOTIC_CHROMOSOME_SEPARATION	16	0.491075	2.3333	0.00194932	0.00931217	0.647
GO_REGULATION_OF_MESENCHYMAL_CELL_PROLIFERATION	26	0.384109	2.33305	0	0.00923433	0.649
GO_REGULATION_OF_MRNA_SPLICING_VIA_SPLICEOSOME	91	0.210671	2.32464	0	0.00977499	0.67
GO_REPLICATION_FORK_PROCESSING	27	0.377751	2.32269	0	0.00983579	0.674
GO_EMBRYONIC_MORPHOGENESIS	406	0.0998938	2.3075	0.00212766	0.0109075	0.716
GO_POSITIVE_REGULATION_OF_CELL_CYCLE_PROCESS	224	0.132732	2.30651	0	0.0108951	0.717
GO_MICROTUBULE_BUNDLE_FORMATION	58	0.254167	2.30152	0	0.0110726	0.728
GO_ADAPTIVE_IMMUNE_RESPONSE_BASED_ON_SOMATIC_RECOMBINATION_OF_IMMUNE_RECEPTORS_BUILT_FROM_IMMUNOGLOBULIN_SUPERFAMILY_DOMAINS	147	0.163046	2.29578	0	0.0113669	0.742
GO_KINETOCHORE_ORGANIZATION	18	0.446351	2.29401	0	0.0113509	0.744
GO_REGULATION_OF_SIGNAL_TRANSDUCTION_BY_P53_CLASS_MEDIATOR	153	0.156242	2.29102	0	0.0114258	0.752
GO_T_CELL_DIFFERENTIATION	162	0.15618	2.29062	0	0.0113346	0.753
GO_SOMATIC_STEM_CELL_DIVISION	21	0.413912	2.2899	0	0.0112533	0.754
GO_DNA_MODIFICATION	78	0.223416	2.28504	0	0.0115458	0.762
GO_CELLULAR_COMPONENT_DISASSEMBLY_INVOLVED_IN_EXECUTION_PHASE_OF_APOPTOSIS	27	0.366587	2.28187	0.00197628	0.0116899	0.772
GO_REGULATION_OF_DOUBLE_STRAND_BREAK_REPAIR_VIA_HOMOLOGOUS_RECOMBINATION	36	0.318994	2.27946	0.00198413	0.011759	0.773
GO_CHROMATIN_ORGANIZATION_INVOLVED_IN_REGULATION_OF_TRANSCRIPTION	70	0.240005	2.27478	0.00211864	0.0119772	0.781
GO_REGULATION_OF_HISTONE_METHYLATION	50	0.271485	2.26709	0.00201613	0.0126309	0.797
GO_EMBRYONIC_APPENDAGE_MORPHOGENESIS	80	0.21988	2.26276	0	0.0128919	0.809
GO_REGULATION_OF_CELL_DIVISION	119	0.176289	2.26022	0	0.0130038	0.813
GO_NEGATIVE_REGULATION_OF_OSSIFICATION	51	0.270715	2.25339	0	0.0135714	0.826
GO_B_CELL_ACTIVATION_INVOLVED_IN_IMMUNE_RESPONSE	51	0.269173	2.25008	0	0.0137953	0.835
GO_MISMATCH_REPAIR	31	0.338475	2.24964	0	0.0137222	0.837
GO_APPENDAGE_DEVELOPMENT	119	0.176573	2.24186	0.00197239	0.0144313	0.853
GO_TYPE_I_INTERFERON_PRODUCTION	109	0.183129	2.22701	0	0.0156153	0.878
GO_DNA_BIOSYNTHETIC_PROCESS	161	0.150761	2.22546	0.00197628	0.0156092	0.88
GO_RENAL_TUBULE_DEVELOPMENT	69	0.221644	2.216	0.00202429	0.0165992	0.895
GO_REGULATION_OF_GENE_SILENCING	100	0.191721	2.21598	0.00196464	0.0164631	0.895
GO_BETA_CATENIN_TCF_COMPLEX_ASSEMBLY	30	0.332273	2.21545	0.00192308	0.0163864	0.895
GO_SISTER_CHROMATID_SEGREGATION	158	0.150538	2.20751	0	0.0171796	0.91
GO_APPENDAGE_MORPHOGENESIS	99	0.190318	2.20233	0	0.0177175	0.916
GO_ALPHA_BETA_T_CELL_ACTIVATION	88	0.199532	2.19605	0.0019802	0.0182952	0.922
GO_MESENCHYMAL_CELL_PROLIFERATION	31	0.329822	2.19427	0	0.0183369	0.924
GO_REGULATION_OF_B_CELL_MEDIATED_IMMUNITY	28	0.349061	2.18851	0	0.0189763	0.932
GO_LEUKOCYTE_DIFFERENTIATION	348	0.101601	2.18799	0.00608519	0.0188638	0.932
GO_NEGATIVE_REGULATION_OF_CELL_DIFFERENTIATION	497	0.0848861	2.18742	0	0.0187594	0.932
GO_COLUMNAR_CUBOIDAL_EPITHELIAL_CELL_DIFFERENTIATION	76	0.215717	2.18721	0.00209205	0.0186428	0.932
GO_NEURAL_TUBE_FORMATION	95	0.190817	2.1855	0.00406504	0.0187679	0.934
GO_POSITIVE_REGULATION_OF_DNA_RECOMBINATION	27	0.349463	2.18075	0	0.0193243	0.941
GO_POSITIVE_REGULATION_OF_CELL_CYCLE	299	0.109928	2.16762	0.00207469	0.0210807	0.957
GO_REGULATION_OF_ADAPTIVE_IMMUNE_RESPONSE	98	0.186075	2.16441	0.00203666	0.0213541	0.958
GO_ALTERNATIVE_MRNA_SPLICING_VIA_SPLICEOSOME	71	0.217899	2.15437	0.0019802	0.0225473	0.964
GO_NUCLEIC_ACID_PHOSPHODIESTER_BOND_HYDROLYSIS	237	0.11687	2.14127	0.00198807	0.0242776	0.971
GO_T_CELL_DIFFERENTIATION_INVOLVED_IN_IMMUNE_RESPONSE	45	0.267368	2.14045	0	0.0242487	0.971
GO_SOMATIC_DIVERSIFICATION_OF_IMMUNE_RECEPTORS	51	0.258239	2.13859	0.00196464	0.0244089	0.974
GO_SEGMENTATION	66	0.225889	2.13088	0.00203252	0.0254186	0.976
GO_ESTABLISHMENT_OF_RNA_LOCALIZATION	177	0.134945	2.12929	0.00215517	0.0255376	0.977
GO_B_CELL_DIFFERENTIATION	91	0.192169	2.12594	0.0020284	0.02592	0.978
GO_MRNA_EXPORT_FROM_NUCLEUS	101	0.18283	2.12446	0.0019802	0.0259548	0.98
GO_CENTRIOLE_ASSEMBLY	34	0.314233	2.11779	0.00409836	0.0268656	0.983
GO_PRODUCTION_OF_SMALL_RNA_INVOLVED_IN_GENE_SILENCING_BY_RNA	45	0.26542	2.11044	0.00195312	0.0280002	0.989
GO_INTERFERON_GAMMA_MEDIATED_SIGNALING_PATHWAY	53	0.249247	2.10928	0.00382409	0.0279894	0.989
GO_HOMOLOGOUS_CHROMOSOME_SEGREGATION	26	0.345521	2.10885	0	0.0278768	0.989
GO_STEM_CELL_DIVISION	35	0.30265	2.10662	0.00424628	0.0280809	0.99
GO_MIRNA_MEDIATED_INHIBITION_OF_TRANSLATION	15	0.450284	2.10319	0.00392927	0.0285475	0.99
GO_IMMUNOGLOBULIN_PRODUCTION	64	0.224892	2.10226	0.00425532	0.0285095	0.99
GO_CELL_FATE_SPECIFICATION	46	0.264572	2.09979	0.00199203	0.0287735	0.99
GO_REGULATION_OF_HISTONE_MODIFICATION	115	0.166704	2.098	0	0.0289024	0.99
GO_ERYTHROCYTE_HOMEOSTASIS	97	0.177394	2.09732	0.00769231	0.0288109	0.99
GO_MITOTIC_DNA_INTEGRITY_CHECKPOINT	94	0.188463	2.09491	0.00200803	0.0290846	0.994
GO_MICROTUBULE_ORGANIZING_CENTER_ORGANIZATION	120	0.162025	2.09239	0.004329	0.029317	0.995
GO_MUSCLE_STRUCTURE_DEVELOPMENT	445	0.0857361	2.09189	0	0.0292355	0.995
GO_PEPTIDYL_LYSINE_TRIMETHYLATION	32	0.309962	2.09179	0	0.0290768	0.995
GO_METHYLATION_DEPENDENT_CHROMATIN_SILENCING	15	0.447912	2.09066	0	0.0290484	0.995
GO_MRNA_PROCESSING	443	0.0844135	2.09054	0	0.0288766	0.995
GO_POSITIVE_REGULATION_OF_TYPE_I_INTERFERON_PRODUCTION	70	0.21033	2.08877	0.00613497	0.0289757	0.995
GO_ATP_DEPENDENT_CHROMATIN_REMODELING	67	0.213332	2.08788	0.00596422	0.0289707	0.995
GO_CILIUM_MOVEMENT	33	0.303749	2.08733	0.00422833	0.028889	0.995
GO_REGULATION_OF_RESPONSE_TO_CYTOKINE_STIMULUS	135	0.157528	2.08482	0.00428265	0.0291704	0.995
GO_POSITIVE_REGULATION_OF_CREB_TRANSCRIPTION_FACTOR_ACTIVITY	15	0.447991	2.08245	0.00408163	0.0294322	0.995
GO_SOMATIC_DIVERSIFICATION_OF_IMMUNE_RECEPTORS_VIA_GERMLINE_RECOMBINATION_WITHIN_A_SINGLE_LOCUS	43	0.26952	2.08141	0.00943396	0.0294827	0.995
GO_IMMUNOGLOBULIN_PRODUCTION_INVOLVED_IN_IMMUNOGLOBULIN_MEDIATED_IMMUNE_RESPONSE	34	0.298317	2.07747	0.00397614	0.0300035	0.996
GO_CELL_CYCLE_G1_S_PHASE_TRANSITION	229	0.117739	2.07631	0.0121951	0.0301294	0.996
GO_NEGATIVE_REGULATION_OF_MRNA_PROCESSING	29	0.324084	2.07084	0.00587084	0.0310536	0.996
GO_NEGATIVE_REGULATION_OF_METAPHASE_ANAPHASE_TRANSITION_OF_CELL_CYCLE	34	0.298445	2.06858	0.00404858	0.0312799	0.996
GO_SKELETAL_SYSTEM_DEVELOPMENT	354	0.0958764	2.06521	0.0020202	0.0317514	0.997
GO_MUSCLE_TISSUE_DEVELOPMENT	262	0.105929	2.06191	0.00666667	0.0322962	0.997
GO_POSTREPLICATION_REPAIR	47	0.252556	2.05038	0.00203666	0.0344611	0.999
GO_POSITIVE_REGULATION_OF_B_CELL_MEDIATED_IMMUNITY	18	0.40082	2.05012	0.00417537	0.0343182	0.999
GO_HEART_MORPHOGENESIS	177	0.132765	2.0439	0.00630252	0.0354321	0.999
GO_EMBRYONIC_ORGAN_MORPHOGENESIS	185	0.128598	2.04315	0.00816326	0.0353849	0.999
GO_MRNA_SPLICE_SITE_SELECTION	30	0.310501	2.04237	0.00397614	0.0353341	0.999
GO_INTERLEUKIN_12_PRODUCTION	36	0.288962	2.03973	0.00408998	0.0357343	0.999
GO_STEM_CELL_PROLIFERATION	86	0.187505	2.03583	0.00601202	0.0364611	0.999
GO_NUCLEOSOME_ORGANIZATION	92	0.18401	2.03399	0	0.0366601	1
GO_MESODERM_DEVELOPMENT	78	0.192099	2.03361	0.0059761	0.0365394	1
GO_GENE_SILENCING_BY_RNA	130	0.149744	2.0303	0	0.0369287	1
GO_DNA_METHYLATION_OR_DEMETHYLATION	59	0.227226	2.02935	0.00585938	0.0369239	1
GO_REGULATION_OF_RESPONSE_TO_DNA_DAMAGE_STIMULUS	183	0.13127	2.02316	0.0114068	0.0382483	1
GO_MATURE_B_CELL_DIFFERENTIATION	20	0.370406	2.01518	0.012605	0.0400664	1
GO_POSITIVE_REGULATION_BY_HOST_OF_VIRAL_TRANSCRIPTION	15	0.443969	2.0073	0.00819672	0.0416583	1
GO_NEGATIVE_REGULATION_OF_MRNA_SPLICING_VIA_SPLICEOSOME	21	0.365171	2.00501	0.00787402	0.041964	1
GO_RESPONSE_TO_TYPE_I_INTERFERON	68	0.20895	2.00339	0.00374532	0.042125	1
GO_NUCLEAR_EXPORT	179	0.12891	1.99658	0.00386847	0.0435903	1
GO_RNA_METHYLATION	68	0.206471	1.996	0.0019802	0.0435359	1
GO_NEGATIVE_REGULATION_OF_CHROMATIN_ORGANIZATION	41	0.270659	1.993	0.00205339	0.044058	1
GO_REGULATION_OF_JUN_KINASE_ACTIVITY	70	0.202102	1.99238	0.00408998	0.0440112	1
GO_REGULATION_OF_DNA_DEPENDENT_DNA_REPLICATION	41	0.26123	1.99167	0.00377358	0.0440293	1
GO_REGULATION_OF_OSTEOBLAST_DIFFERENTIATION	84	0.185203	1.98881	0.0105263	0.044534	1
GO_REGULATION_OF_B_CELL_ACTIVATION	83	0.184141	1.9888	0.00391389	0.0443044	1
GO_POSITIVE_REGULATION_OF_EPIDERMIS_DEVELOPMENT	19	0.385554	1.98867	0.00572519	0.0441089	1
GO_EAR_MORPHOGENESIS	72	0.196235	1.98453	0.00198413	0.0449876	1
GO_SPLEEN_DEVELOPMENT	25	0.325905	1.98397	0.00414079	0.0449061	1
GO_EMBRYO_DEVELOPMENT_ENDING_IN_BIRTH_OR_EGG_HATCHING	491	0.0789546	1.98117	0.00411523	0.0453672	1
GO_REGULATION_OF_CYTOKINESIS	70	0.202672	1.97376	0.00627615	0.0472483	1
GO_MORPHOGENESIS_OF_AN_EPITHELIUM	423	0.0827009	1.96533	0.0102669	0.0495378	1
GO_SIGNAL_TRANSDUCTION_INVOLVED_IN_CELL_CYCLE_CHECKPOINT	65	0.206637	1.96306	0.0040404	0.049978	1
GO_NEUROEPITHELIAL_CELL_DIFFERENTIATION	35	0.280368	1.9628	0.00924214	0.0498087	1
GO_INNER_EAR_AUDITORY_RECEPTOR_CELL_DIFFERENTIATION	22	0.357809	1.96271	0.006	0.0495984	1
GO_NEGATIVE_REGULATION_OF_UBIQUITIN_PROTEIN_TRANSFERASE_ACTIVITY	16	0.406304	1.95012	0	0.0532562	1
GO_HISTONE_H3_K4_METHYLATION	43	0.256103	1.94989	0.0103093	0.0530645	1
GO_MORPHOGENESIS_OF_A_BRANCHING_STRUCTURE	145	0.14076	1.94647	0.00392927	0.0538241	1
GO_POSITIVE_REGULATION_OF_HISTONE_METHYLATION	33	0.288151	1.93937	0.00402414	0.055698	1
GO_POSITIVE_REGULATION_OF_JUN_KINASE_ACTIVITY	59	0.217805	1.9358	0.00775194	0.0565701	1
GO_DNA_DEMETHYLATION	15	0.41711	1.93568	0.0103093	0.0563371	1
GO_B_CELL_MEDIATED_IMMUNITY	60	0.213574	1.93492	0.00954198	0.056324	1
GO_CILIARY_BASAL_BODY_PLASMA_MEMBRANE_DOCKING	93	0.175773	1.93326	0.00399202	0.0565425	1
GO_POSITIVE_REGULATION_OF_CYTOKINESIS	25	0.326321	1.9313	0.00603622	0.0569226	1
GO_EMBRYONIC_SKELETAL_SYSTEM_MORPHOGENESIS	59	0.212567	1.93124	0.00570342	0.0566595	1
GO_NEGATIVE_REGULATION_OF_DNA_METABOLIC_PROCESS	83	0.179407	1.92985	0.00970874	0.05688	1
GO_REGULATION_OF_OSSIFICATION	136	0.138176	1.92541	0.00598802	0.0580631	1
GO_CARDIAC_VENTRICLE_MORPHOGENESIS	51	0.221604	1.91642	0.0116279	0.0608946	1
GO_RESPONSE_TO_PROTOZOAN	16	0.390168	1.90733	0.00814664	0.0636652	1
GO_CD4_POSITIVE_ALPHA_BETA_T_CELL_DIFFERENTIATION	51	0.22681	1.9016	0.00761905	0.0653323	1
GO_NCRNA_METABOLIC_PROCESS	377	0.0843711	1.89959	0.00804829	0.0657313	1
GO_THYMUS_DEVELOPMENT	35	0.267071	1.89552	0.011811	0.0670011	1
GO_NEGATIVE_REGULATION_OF_DNA_REPAIR	25	0.322669	1.89147	0.0127389	0.0682268	1
GO_PROTEIN_SUMOYLATION	68	0.193096	1.89008	0.0125786	0.0684335	1
GO_SYNAPSIS	20	0.360773	1.88948	0.00809717	0.068375	1
GO_DIGESTIVE_SYSTEM_DEVELOPMENT	96	0.167275	1.88904	0.0120482	0.0682812	1
GO_SOMATIC_RECOMBINATION_OF_IMMUNOGLOBULIN_GENE_SEGMENTS	36	0.260678	1.88749	0.00829876	0.0685322	1
GO_AXIS_SPECIFICATION	55	0.21118	1.88726	0.0100402	0.0683379	1
GO_INNER_EAR_MORPHOGENESIS	59	0.204792	1.88143	0.00581395	0.0702658	1
GO_REGULATION_OF_CHROMATIN_BINDING	18	0.373834	1.88115	0.0141988	0.0700574	1
GO_CD4_POSITIVE_ALPHA_BETA_T_CELL_ACTIVATION	60	0.206282	1.8783	0.00854701	0.0708212	1
GO_REGULATION_OF_HISTONE_H3_K9_METHYLATION	18	0.371956	1.87703	0.014	0.0709834	1
GO_POSITIVE_REGULATION_OF_GENE_EXPRESSION_EPIGENETIC	49	0.225796	1.87623	0.00632911	0.0709917	1
GO_NEURON_FATE_COMMITMENT	30	0.284128	1.87437	0.0119048	0.0714276	1
GO_NEGATIVE_REGULATION_OF_RNA_CATABOLIC_PROCESS	47	0.231016	1.86966	0.00980392	0.0730099	1
GO_NEURAL_TUBE_DEVELOPMENT	137	0.13776	1.86802	0.0241636	0.0733363	1
GO_MITOTIC_SPINDLE_ORGANIZATION	97	0.161929	1.86563	0.00976562	0.0739463	1
GO_MYOBLAST_DIFFERENTIATION	57	0.210062	1.86354	0.0103093	0.074505	1
GO_DNA_REPLICATION_INITIATION	35	0.26487	1.86189	0.0155945	0.0748981	1
GO_REGULATION_OF_CHROMOSOME_SEGREGATION	90	0.165387	1.85847	0.0113636	0.0758862	1
GO_RNA_EXPORT_FROM_NUCLEUS	125	0.144223	1.85817	0.0143443	0.0757196	1
GO_CENTROSOME_DUPLICATION	61	0.203024	1.85704	0.0177866	0.0758581	1
GO_ESTABLISHMENT_OF_PLANAR_POLARITY_OF_EMBRYONIC_EPITHELIUM	16	0.381332	1.85365	0.0137795	0.0769869	1
GO_ALPHA_BETA_T_CELL_DIFFERENTIATION	69	0.189909	1.85127	0.0157171	0.0776958	1
GO_POSITIVE_REGULATION_OF_MYELOID_CELL_DIFFERENTIATION	64	0.196378	1.84142	0.0123203	0.081644	1
GO_NEGATIVE_REGULATION_OF_VIRAL_PROCESS	60	0.202977	1.84138	0.00635593	0.0813273	1
GO_PEPTIDYL_LYSINE_ACETYLATION	145	0.13329	1.84121	0.00792079	0.0810668	1
GO_RESPONSE_TO_INTERFERON_GAMMA	121	0.143349	1.84044	0.00560748	0.0810987	1
GO_DNA_CATABOLIC_PROCESS_ENDONUCLEOLYTIC	22	0.327647	1.84017	0.0118343	0.0808697	1
GO_INTERSTRAND_CROSS_LINK_REPAIR	49	0.22631	1.83969	0.00795229	0.0807661	1
GO_VIRAL_GENE_EXPRESSION	171	0.121904	1.83556	0.0185567	0.0823088	1
GO_RESPONSE_TO_MURAMYL_DIPEPTIDE	17	0.357722	1.8348	0.0182556	0.08233	1
GO_NEPHRON_MORPHOGENESIS	53	0.213142	1.82962	0.0191205	0.0843495	1
GO_G2_DNA_DAMAGE_CHECKPOINT	25	0.305237	1.82831	0.0136719	0.0846414	1
GO_DNA_DEALKYLATION	20	0.333808	1.8255	0.0139165	0.0856454	1
GO_POSITIVE_REGULATION_OF_RNA_SPLICING	31	0.27591	1.82541	0.0178218	0.085329	1
GO_NEGATIVE_REGULATION_OF_I_KAPPAB_KINASE_NF_KAPPAB_SIGNALING	37	0.246761	1.82434	0.01875	0.0854661	1
GO_INTERFERON_BETA_PRODUCTION	47	0.22843	1.82374	0.0139165	0.0854144	1
GO_REGULATION_OF_EMBRYONIC_DEVELOPMENT	95	0.157251	1.82268	0.0118812	0.085578	1
GO_RNA_MODIFICATION	131	0.13848	1.82211	0.0122699	0.0854768	1
GO_HAIR_CELL_DIFFERENTIATION	26	0.29836	1.82163	0.0235546	0.0853434	1
GO_REGULATION_OF_NUCLEAR_DIVISION	152	0.129654	1.81999	0.0078125	0.0857541	1
GO_POSITIVE_REGULATION_OF_CHROMATIN_ORGANIZATION	85	0.16839	1.81938	0.008	0.0857522	1
GO_NCRNA_PROCESSING	321	0.08903	1.81902	0.0100604	0.0856156	1
GO_CARDIAC_CHAMBER_DEVELOPMENT	128	0.138912	1.81827	0.00809717	0.0856471	1
GO_MAMMARY_GLAND_MORPHOGENESIS	36	0.254599	1.81213	0.0115163	0.0882233	1
GO_EMBRYONIC_HINDLIMB_MORPHOGENESIS	16	0.380299	1.8079	0.0155945	0.0897972	1
GO_CELL_CYCLE_G2_M_PHASE_TRANSITION	240	0.100419	1.80576	0.0169133	0.0904945	1
GO_REGULATION_OF_ISOTYPE_SWITCHING	21	0.335901	1.80456	0.0119522	0.0906981	1
GO_EXTRACELLULAR_TRANSPORT	18	0.359177	1.80428	0.00202429	0.090481	1
GO_REGULATION_OF_DNA_BINDING_TRANSCRIPTION_FACTOR_ACTIVITY	328	0.0836259	1.80078	0.0101626	0.09185	1
GO_POSITIVE_REGULATION_OF_CARDIAC_MUSCLE_TISSUE_DEVELOPMENT	34	0.257417	1.7981	0.015873	0.0928565	1
GO_LYMPHOCYTE_MEDIATED_IMMUNITY	131	0.135589	1.79579	0.00614754	0.0935819	1
GO_SIGNAL_TRANSDUCTION_IN_RESPONSE_TO_DNA_DAMAGE	115	0.144207	1.79496	0.0164534	0.0936344	1
GO_COLLAGEN_BIOSYNTHETIC_PROCESS	33	0.259382	1.79185	0.0223577	0.0947486	1
GO_DEFENSE_RESPONSE_TO_VIRUS	154	0.124551	1.79182	0.0165631	0.0944189	1
GO_MAMMARY_GLAND_DUCT_MORPHOGENESIS	25	0.301143	1.791	0.0226337	0.094503	1
GO_REGULATION_OF_TRANSCRIPTION_INVOLVED_IN_G1_S_TRANSITION_OF_MITOTIC_CELL_CYCLE	25	0.300578	1.78926	0.012474	0.0950449	1
GO_NUCLEOBASE_CONTAINING_COMPOUND_TRANSPORT	213	0.109336	1.78687	0.0158416	0.0959826	1
GO_PROTEIN_LOCALIZATION_TO_CYTOSKELETON	56	0.201894	1.78402	0.01875	0.0971485	1
GO_REGULATION_OF_HISTONE_H3_K4_METHYLATION	22	0.317488	1.78269	0.0176125	0.097575	1
GO_ACTIVATION_OF_JUN_KINASE_ACTIVITY	30	0.273957	1.78061	0.0201613	0.0982864	1
GO_NEGATIVE_REGULATION_OF_CHROMOSOME_SEGREGATION	40	0.238104	1.77881	0.0273438	0.0988959	1
GO_EMBRYONIC_SKELETAL_SYSTEM_DEVELOPMENT	77	0.172757	1.77844	0.0259481	0.0987722	1
GO_RNA_STABILIZATION	40	0.238752	1.77597	0.00604839	0.0997987	1
GO_POSITIVE_REGULATION_OF_IMMUNOGLOBULIN_PRODUCTION	18	0.349228	1.77007	0.0209644	0.102668	1
GO_NOTCH_SIGNALING_PATHWAY	144	0.126717	1.76548	0.0216535	0.104846	1
GO_REGULATION_OF_MEGAKARYOCYTE_DIFFERENTIATION	44	0.223314	1.76372	0.0239044	0.105529	1
GO_NEGATIVE_REGULATION_OF_CELL_CYCLE_G1_S_PHASE_TRANSITION	93	0.153652	1.76336	0.0195695	0.105315	1
GO_SKELETAL_MUSCLE_ORGAN_DEVELOPMENT	104	0.147388	1.76336	0.0287356	0.104952	1
GO_DEFENSE_RESPONSE_TO_GRAM_POSITIVE_BACTERIUM	34	0.257193	1.76099	0.0327198	0.105894	1
GO_SEMAPHORIN_PLEXIN_SIGNALING_PATHWAY	37	0.244745	1.76021	0.0147992	0.105953	1
GO_NUCLEAR_TRANSPORT	301	0.088063	1.75133	0.010395	0.110413	1
GO_NEGATIVE_REGULATION_OF_EXTRINSIC_APOPTOTIC_SIGNALING_PATHWAY	80	0.169449	1.74786	0.0163934	0.112045	1
GO_MITOTIC_CHROMOSOME_CONDENSATION	16	0.372126	1.74675	0.0243408	0.112327	1
GO_MYELOID_CELL_HOMEOSTASIS	117	0.137222	1.74577	0.0155039	0.112467	1
GO_NEPHRON_EPITHELIUM_DEVELOPMENT	79	0.166327	1.74331	0.0244821	0.113511	1
GO_RNA_SPLICING	386	0.0787144	1.74292	0.0197628	0.113317	1
GO_REGULATION_OF_SISTER_CHROMATID_SEGREGATION	72	0.174442	1.74218	0.0140845	0.113379	1
GO_DEMETHYLATION	44	0.221866	1.73887	0.0145228	0.115022	1
GO_SOMITE_DEVELOPMENT	57	0.191885	1.7387	0.0275591	0.114704	1
GO_HISTONE_H4_K16_ACETYLATION	20	0.322242	1.735	0.022	0.116614	1
GO_REGULATION_OF_ALPHA_BETA_T_CELL_ACTIVATION	60	0.190742	1.73266	0.0268199	0.117607	1
GO_CARDIAC_MUSCLE_TISSUE_MORPHOGENESIS	43	0.220394	1.73082	0.0175439	0.118293	1
GO_REGULATION_OF_LEUKOCYTE_ADHESION_TO_VASCULAR_ENDOTHELIAL_CELL	16	0.358061	1.73011	0.0181087	0.118358	1
GO_POSITIVE_REGULATION_OF_B_CELL_ACTIVATION	52	0.201266	1.7284	0.0220884	0.119012	1
GO_REGULATION_OF_CARDIAC_MUSCLE_TISSUE_DEVELOPMENT	57	0.188941	1.72667	0.024948	0.119671	1
GO_NEGATIVE_REGULATION_OF_MYOBLAST_DIFFERENTIATION	18	0.332266	1.72599	0.0123711	0.119734	1
GO_CARDIAC_MUSCLE_TISSUE_DEVELOPMENT	147	0.124631	1.72569	0.0217822	0.119532	1
GO_CELLULAR_PROCESS_INVOLVED_IN_REPRODUCTION_IN_MULTICELLULAR_ORGANISM	179	0.108755	1.72389	0.0162933	0.12018	1
GO_MICROTUBULE_CYTOSKELETON_ORGANIZATION_INVOLVED_IN_MITOSIS	122	0.134092	1.72316	0.0265152	0.120202	1
GO_PROTEIN_ACETYLATION	170	0.113511	1.72008	0.0221774	0.121763	1
GO_REGULATION_OF_ERYTHROCYTE_DIFFERENTIATION	40	0.226212	1.71995	0.0186335	0.121482	1
GO_REGULATION_OF_MYOBLAST_DIFFERENTIATION	34	0.24175	1.7198	0.0174419	0.121185	1
GO_VENTRICULAR_CARDIAC_MUSCLE_TISSUE_DEVELOPMENT	40	0.227925	1.71708	0.0224033	0.122469	1
GO_NEGATIVE_REGULATION_OF_PROTEIN_MODIFICATION_BY_SMALL_PROTEIN_CONJUGATION_OR_REMOVAL	75	0.166447	1.71339	0.0298805	0.124289	1
GO_REGULATION_OF_POLYSACCHARIDE_METABOLIC_PROCESS	33	0.254388	1.71283	0.0430528	0.124189	1
GO_SPERM_MOTILITY	31	0.260035	1.71096	0.0235756	0.125013	1
GO_POSITIVE_REGULATION_OF_MUSCLE_TISSUE_DEVELOPMENT	48	0.209721	1.70966	0.0227273	0.12535	1
GO_CELL_DIFFERENTIATION_INVOLVED_IN_EMBRYONIC_PLACENTA_DEVELOPMENT	18	0.327617	1.70666	0.0440882	0.126986	1
GO_POSITIVE_REGULATION_OF_PROTEIN_TARGETING_TO_MITOCHONDRION	30	0.265791	1.70422	0.0379242	0.128209	1
GO_REGULATION_OF_LEUKOCYTE_PROLIFERATION	127	0.127979	1.70368	0.0292398	0.128146	1
GO_RNA_LOCALIZATION	208	0.101339	1.70366	0.0414313	0.127764	1
GO_B_CELL_PROLIFERATION	54	0.195796	1.7002	0.0278884	0.129625	1
GO_APOPTOTIC_PROCESS_INVOLVED_IN_MORPHOGENESIS	18	0.329553	1.69858	0.0209644	0.130318	1
GO_BONE_MATURATION	15	0.362032	1.69857	0.0281125	0.129916	1
GO_CARDIAC_CHAMBER_MORPHOGENESIS	91	0.152874	1.69606	0.0256959	0.131244	1
GO_REGULATION_OF_VIRAL_TRANSCRIPTION	55	0.195791	1.69425	0.0395257	0.132143	1
GO_REGULATION_OF_CELL_CYCLE_PHASE_TRANSITION	386	0.0757664	1.69241	0.0283401	0.132989	1
GO_POSITIVE_REGULATION_OF_CARDIAC_MUSCLE_CELL_PROLIFERATION	19	0.312479	1.69112	0.0271318	0.133461	1
GO_ATTACHMENT_OF_SPINDLE_MICROTUBULES_TO_KINETOCHORE	26	0.275171	1.69089	0.0326531	0.133211	1
GO_METAPHASE_ANAPHASE_TRANSITION_OF_CELL_CYCLE	52	0.197776	1.6871	0.025641	0.135242	1
GO_REGULATION_OF_CELL_CYCLE_G2_M_PHASE_TRANSITION	189	0.106404	1.68564	0.033264	0.135868	1
GO_POSITIVE_REGULATION_OF_CARDIOCYTE_DIFFERENTIATION	22	0.296575	1.6854	0.027833	0.135649	1
GO_PRODUCTION_OF_MOLECULAR_MEDIATOR_OF_IMMUNE_RESPONSE	124	0.12943	1.68436	0.0218254	0.135925	1
GO_POSITIVE_REGULATION_OF_MRNA_SPLICING_VIA_SPLICEOSOME	18	0.325889	1.68391	0.036	0.135834	1
GO_POSITIVE_REGULATION_OF_INTERLEUKIN_12_PRODUCTION	23	0.298159	1.68204	0.0240964	0.136728	1
GO_LEUKOCYTE_PROLIFERATION	172	0.111163	1.6811	0.0280561	0.136966	1
GO_DORSAL_VENTRAL_PATTERN_FORMATION	57	0.186734	1.675	0.0132576	0.140838	1
GO_MRNA_3_END_PROCESSING	91	0.148068	1.67497	0.0354906	0.140452	1
GO_POSITIVE_REGULATION_OF_DNA_METABOLIC_PROCESS	155	0.115612	1.67467	0.0261569	0.140261	1
GO_POSITIVE_REGULATION_OF_HEMOPOIESIS	132	0.124699	1.67307	0.0404255	0.140951	1
GO_REGULATION_OF_GENE_EXPRESSION_BY_GENETIC_IMPRINTING	16	0.341925	1.67189	0.0387755	0.141365	1
GO_NEGATIVE_REGULATION_OF_VIRAL_TRANSCRIPTION	21	0.308701	1.67187	0.040404	0.140962	1
GO_NEGATIVE_REGULATION_OF_HISTONE_METHYLATION	16	0.351042	1.66651	0.034413	0.144276	1
GO_MALE_MEIOTIC_NUCLEAR_DIVISION	22	0.297299	1.65866	0.031068	0.149508	1
GO_REGULATION_OF_MONOCYTE_DIFFERENTIATION	15	0.358169	1.65838	0.0358566	0.149291	1
GO_BRANCHING_MORPHOGENESIS_OF_AN_EPITHELIAL_TUBE	110	0.135332	1.65795	0.0316206	0.149212	1
GO_LEFT_RIGHT_PATTERN_FORMATION	18	0.325457	1.65461	0.04158	0.151194	1
GO_AXONEME_ASSEMBLY	30	0.249013	1.65293	0.035503	0.152075	1
GO_EMBRYONIC_FORELIMB_MORPHOGENESIS	15	0.352826	1.65141	0.0348162	0.152836	1
GO_MEGAKARYOCYTE_DIFFERENTIATION	58	0.184488	1.64998	0.0301811	0.15344	1
GO_T_CELL_SELECTION	24	0.283621	1.64971	0.0365385	0.153218	1
GO_POSITIVE_REGULATION_OF_SMOOTHENED_SIGNALING_PATHWAY	27	0.265816	1.64957	0.0437262	0.152897	1
GO_NEGATIVE_REGULATION_OF_TUMOR_NECROSIS_FACTOR_SUPERFAMILY_CYTOKINE_PRODUCTION	41	0.218462	1.64674	0.0371094	0.154558	1
GO_POSITIVE_REGULATION_OF_STEM_CELL_DIFFERENTIATION	16	0.340294	1.64649	0.0423892	0.15431	1
GO_PLACENTA_DEVELOPMENT	109	0.132923	1.64461	0.0336634	0.155297	1
GO_NEGATIVE_REGULATION_OF_CELL_CYCLE_PHASE_TRANSITION	209	0.0979776	1.64336	0.0421456	0.155811	1
GO_TUMOR_NECROSIS_FACTOR_SUPERFAMILY_CYTOKINE_PRODUCTION	110	0.132014	1.64282	0.031746	0.155736	1
GO_NEGATIVE_REGULATION_OF_RNA_SPLICING	26	0.275389	1.64212	0.0232558	0.155864	1
GO_GOLGI_TO_ENDOSOME_TRANSPORT	15	0.352123	1.64196	0.0302419	0.155535	1
GO_REGULATION_OF_CHROMOSOME_SEPARATION	56	0.18818	1.63997	0.040568	0.156604	1
GO_POSITIVE_REGULATION_OF_FIBROBLAST_PROLIFERATION	41	0.213847	1.63978	0.039749	0.156314	1
GO_ANIMAL_ORGAN_FORMATION	41	0.215358	1.6387	0.0364807	0.156741	1
GO_NUCLEUS_LOCALIZATION	25	0.271513	1.63709	0.0482897	0.157464	1
GO_NEURONAL_STEM_CELL_POPULATION_MAINTENANCE	22	0.289812	1.63683	0.0403397	0.157269	1
GO_REGULATION_OF_LYMPHOCYTE_DIFFERENTIATION	116	0.129107	1.63078	0.0285132	0.16163	1
GO_ODONTOGENESIS_OF_DENTIN_CONTAINING_TOOTH	52	0.190552	1.62987	0.0357895	0.161881	1
GO_HINDLIMB_MORPHOGENESIS	21	0.308901	1.62954	0.0372549	0.161706	1
GO_VENTRICULAR_SYSTEM_DEVELOPMENT	23	0.284063	1.62739	0.0353635	0.162836	1
GO_POSITIVE_REGULATION_OF_CHROMOSOME_ORGANIZATION	148	0.115066	1.62334	0.0419162	0.165679	1
GO_REGULATION_OF_IMMUNOGLOBULIN_PRODUCTION	32	0.250716	1.62329	0.041502	0.165272	1
GO_GLAND_DEVELOPMENT	310	0.0793012	1.62277	0.0431373	0.165209	1
GO_REGULATION_OF_ANIMAL_ORGAN_MORPHOGENESIS	188	0.100411	1.6213	0.036965	0.165974	1
GO_SKELETAL_SYSTEM_MORPHOGENESIS	165	0.108652	1.61943	0.0408163	0.167025	1
GO_NEGATIVE_REGULATION_OF_GENE_SILENCING	23	0.278712	1.61933	0.0444444	0.166651	1
GO_REGULATION_OF_EPIDERMIS_DEVELOPMENT	49	0.19937	1.61916	0.0287474	0.166359	1
GO_CELL_FATE_DETERMINATION	27	0.266576	1.61822	0.0446247	0.166652	1
GO_SNRNA_3_END_PROCESSING	17	0.325421	1.61747	0.0377734	0.166873	1
GO_ARTERY_MORPHOGENESIS	51	0.188129	1.61619	0.0485232	0.16749	1
GO_PHARYNGEAL_SYSTEM_DEVELOPMENT	17	0.32539	1.61492	0.0365112	0.168118	1
GO_HEART_DEVELOPMENT	419	0.0676817	1.61399	0.0354331	0.168422	1
GO_REGULATION_OF_GLYCOGEN_METABOLIC_PROCESS	25	0.25953	1.61296	0.0397614	0.168832	1
GO_NEGATIVE_REGULATION_OF_TELOMERE_MAINTENANCE_VIA_TELOMERASE	17	0.325104	1.61267	0.0408163	0.168653	1
GO_APOPTOTIC_DNA_FRAGMENTATION	17	0.322685	1.61206	0.0436508	0.168668	1
GO_NEGATIVE_REGULATION_OF_HISTONE_MODIFICATION	33	0.235673	1.61103	0.038835	0.169065	1
GO_REGULATION_OF_MRNA_POLYADENYLATION	15	0.335252	1.61097	0.0357895	0.16869	1
GO_CILIUM_OR_FLAGELLUM_DEPENDENT_CELL_MOTILITY	42	0.206245	1.60883	0.0474308	0.170012	1
GO_POSITIVE_REGULATION_OF_JNK_CASCADE	105	0.131316	1.60839	0.057732	0.169938	1
GO_DNA_CATABOLIC_PROCESS	27	0.261981	1.60641	0.0262626	0.171145	1
GO_MESONEPHRIC_TUBULE_MORPHOGENESIS	41	0.210127	1.60625	0.0447154	0.170811	1
GO_NEGATIVE_REGULATION_OF_CELL_CELL_ADHESION	115	0.124263	1.60605	0.0393375	0.170514	1
GO_POSITIVE_REGULATION_OF_CILIUM_ASSEMBLY	18	0.314095	1.6059	0.0416667	0.170195	1
GO_PROSTATE_GLAND_DEVELOPMENT	35	0.225741	1.60495	0.0515464	0.170517	1
GO_NEGATIVE_REGULATION_OF_NUCLEAR_DIVISION	50	0.190232	1.60359	0.0465116	0.171231	1
GO_REGULATION_OF_CELL_CYCLE_G1_S_PHASE_TRANSITION	143	0.114938	1.598	0.0383838	0.175211	1
GO_SPINAL_CORD_DEVELOPMENT	73	0.157379	1.59671	0.0447154	0.17587	1
GO_MONONUCLEAR_CELL_DIFFERENTIATION	26	0.265763	1.59628	0.0511811	0.175746	1
GO_SENSORY_ORGAN_MORPHOGENESIS	172	0.105122	1.59348	0.0606061	0.177572	1
GO_REGULATION_OF_DOUBLE_STRAND_BREAK_REPAIR_VIA_NONHOMOLOGOUS_END_JOINING	17	0.320582	1.59152	0.050813	0.178848	1
GO_REGULATION_OF_CELL_CELL_ADHESION	263	0.0842932	1.5896	0.0530452	0.180059	1
GO_REGULATION_OF_CELLULAR_RESPONSE_TO_HEAT	76	0.153845	1.5892	0.0490196	0.179992	1
GO_POST_EMBRYONIC_DEVELOPMENT	74	0.156971	1.58901	0.0449219	0.179696	1
GO_FEMALE_MEIOTIC_NUCLEAR_DIVISION	23	0.280722	1.58742	0.0336634	0.180598	1
GO_NEGATIVE_REGULATION_OF_CELLULAR_SENESCENCE	17	0.318093	1.58716	0.0441767	0.180379	1
GO_CARDIAC_MUSCLE_CELL_PROLIFERATION	37	0.224587	1.58714	0.0513834	0.179948	1
GO_REGULATORY_T_CELL_DIFFERENTIATION	18	0.306546	1.58129	0.0515464	0.184559	1
GO_POSITIVE_REGULATION_OF_DOUBLE_STRAND_BREAK_REPAIR	25	0.266638	1.57929	0.0546218	0.185864	1
GO_FORELIMB_MORPHOGENESIS	21	0.286213	1.57744	0.0472441	0.186958	1
GO_SPECIFICATION_OF_ANIMAL_ORGAN_IDENTITY	20	0.304177	1.57478	0.0445344	0.188903	1
GO_POSITIVE_REGULATION_OF_CELL_CYCLE_ARREST	71	0.154994	1.57476	0.0461847	0.188454	1
GO_REGULATION_OF_CELL_CYCLE_ARREST	90	0.144379	1.57469	0.0432099	0.188052	1
GO_COLUMNAR_CUBOIDAL_EPITHELIAL_CELL_DEVELOPMENT	44	0.200833	1.57156	0.0610998	0.190321	1
GO_POSITIVE_REGULATION_OF_ADAPTIVE_IMMUNE_RESPONSE	60	0.170979	1.57068	0.0566802	0.190745	1
GO_CELLULAR_RESPONSE_TO_ALCOHOL	65	0.168044	1.56741	0.0467091	0.193109	1
GO_G1_DNA_DAMAGE_CHECKPOINT	59	0.170401	1.5662	0.0492813	0.193679	1
GO_POSITIVE_REGULATION_OF_RESPONSE_TO_CYTOKINE_STIMULUS	47	0.192865	1.56426	0.040568	0.194927	1
GO_T_CELL_ACTIVATION	294	0.0805928	1.56336	0.0451866	0.195257	1
GO_STRIATED_MUSCLE_CELL_PROLIFERATION	47	0.191319	1.56181	0.060241	0.196226	1
GO_DNA_METHYLATION	46	0.197573	1.56163	0.0566802	0.195899	1
GO_REGULATION_OF_TUMOR_NECROSIS_FACTOR_MEDIATED_SIGNALING_PATHWAY	43	0.200889	1.55864	0.0391753	0.198133	1
GO_NEGATIVE_REGULATION_OF_EPITHELIAL_CELL_DIFFERENTIATION	29	0.238128	1.55805	0.0509165	0.198234	1
GO_RESPONSE_TO_BMP	112	0.128681	1.55803	0.0475248	0.197777	1
GO_MAINTENANCE_OF_CELL_NUMBER	129	0.116557	1.55717	0.038	0.198062	1
GO_PROTEIN_MONOUBIQUITINATION	62	0.167045	1.55671	0.047817	0.198011	1
GO_CONNECTIVE_TISSUE_DEVELOPMENT	184	0.0983713	1.55666	0.0650888	0.197608	1
GO_POSITIVE_REGULATION_OF_BMP_SIGNALING_PATHWAY	24	0.262335	1.55206	0.0657371	0.201309	1
GO_GASTRULATION_WITH_MOUTH_FORMING_SECOND	20	0.291328	1.55156	0.0527344	0.201387	1
GO_POSITIVE_REGULATION_OF_NOTCH_SIGNALING_PATHWAY	41	0.20646	1.55055	0.0506073	0.201857	1
GO_T_CELL_DIFFERENTIATION_IN_THYMUS	48	0.187552	1.5484	0.0561122	0.203396	1
GO_CARDIOCYTE_DIFFERENTIATION	104	0.128235	1.54699	0.0668058	0.204312	1
GO_CARDIAC_VENTRICLE_DEVELOPMENT	96	0.13732	1.54573	0.0594262	0.205015	1
GO_EPIDERMAL_CELL_DIFFERENTIATION	107	0.127438	1.54304	0.0519751	0.20712	1
GO_REGULATION_OF_NUCLEASE_ACTIVITY	19	0.290237	1.54245	0.0583501	0.207156	1
GO_TRNA_METHYLATION	34	0.225469	1.53868	0.0540541	0.210209	1
GO_PYRIMIDINE_DEOXYRIBONUCLEOTIDE_METABOLIC_PROCESS	19	0.284869	1.53842	0.0597302	0.209943	1
GO_PROTEIN_LOCALIZATION_TO_MICROTUBULE_ORGANIZING_CENTER	31	0.239016	1.53821	0.0497132	0.209656	1
GO_MRNA_CIS_SPLICING_VIA_SPLICEOSOME	29	0.23813	1.53519	0.0476191	0.212076	1
GO_POSITIVE_REGULATION_OF_STRESS_ACTIVATED_PROTEIN_KINASE_SIGNALING_CASCADE	127	0.114994	1.53499	0.0502008	0.211771	1
GO_REGULATION_OF_TELOMERASE_ACTIVITY	42	0.192836	1.53458	0.0772277	0.21163	1
GO_POSITIVE_REGULATION_OF_INTERFERON_BETA_PRODUCTION	30	0.23738	1.53443	0.0518234	0.211306	1
GO_NEGATIVE_REGULATION_OF_MUSCLE_TISSUE_DEVELOPMENT	35	0.21755	1.53305	0.0670732	0.212108	1
GO_REPRODUCTIVE_SYSTEM_DEVELOPMENT	300	0.0776903	1.52997	0.0678643	0.214554	1
GO_POSITIVE_REGULATION_OF_ANIMAL_ORGAN_MORPHOGENESIS	53	0.176529	1.52816	0.061753	0.215752	1
GO_HEART_FORMATION	19	0.291438	1.52563	0.0670391	0.217717	1
GO_BRANCHING_INVOLVED_IN_MAMMARY_GLAND_DUCT_MORPHOGENESIS	19	0.296039	1.52557	0.0646388	0.2173	1
GO_REGULATION_OF_PROTEIN_TARGETING_TO_MITOCHONDRION	40	0.199124	1.52373	0.058	0.218553	1
GO_EMBRYONIC_PLACENTA_DEVELOPMENT	66	0.160301	1.52256	0.0570866	0.219185	1
GO_MRNA_MODIFICATION	18	0.298441	1.5182	0.075	0.222967	1
GO_NUCLEOSIDE_MONOPHOSPHATE_BIOSYNTHETIC_PROCESS	37	0.206641	1.51653	0.0727969	0.224075	1
GO_PROSTATE_GLAND_MORPHOGENESIS	19	0.286963	1.51476	0.047532	0.225379	1
GO_KIDNEY_MORPHOGENESIS	67	0.158259	1.51112	0.0608519	0.22861	1
GO_POSITIVE_REGULATION_OF_LIPID_STORAGE	16	0.318977	1.51044	0.0790514	0.22879	1
GO_REGULATION_OF_NUCLEOCYTOPLASMIC_TRANSPORT	93	0.13532	1.50963	0.0688976	0.229057	1
GO_REGULATION_OF_MORPHOGENESIS_OF_A_BRANCHING_STRUCTURE	37	0.213079	1.50904	0.064257	0.22914	1
GO_POSITIVE_REGULATION_OF_CARDIAC_MUSCLE_CELL_DIFFERENTIATION	15	0.32183	1.50827	0.0847108	0.229353	1
GO_MITOTIC_G2_DNA_DAMAGE_CHECKPOINT	16	0.317547	1.50751	0.0733753	0.229585	1
GO_CLEAVAGE_INVOLVED_IN_RRNA_PROCESSING	21	0.275268	1.50686	0.0724346	0.229765	1
GO_CORONARY_VASCULATURE_DEVELOPMENT	39	0.20413	1.50472	0.0745698	0.231466	1
GO_SARCOMERE_ORGANIZATION	22	0.261891	1.50371	0.0781893	0.232066	1
GO_REGULATION_OF_POSTTRANSCRIPTIONAL_GENE_SILENCING	78	0.144001	1.50199	0.0566038	0.233265	1
GO_NEGATIVE_REGULATION_OF_CELL_AGING	21	0.270506	1.5008	0.0650888	0.233984	1
GO_TRACHEA_DEVELOPMENT	18	0.293091	1.49873	0.0685484	0.235515	1
GO_ESTABLISHMENT_OF_EPITHELIAL_CELL_POLARITY	26	0.239837	1.49861	0.0580271	0.235115	1
GO_REGULATION_OF_CARDIOCYTE_DIFFERENTIATION	38	0.206265	1.49674	0.078125	0.236583	1
GO_CARDIAC_SEPTUM_MORPHOGENESIS	57	0.164876	1.49619	0.0667976	0.236654	1
GO_NEGATIVE_REGULATION_OF_DNA_RECOMBINATION	25	0.248029	1.496	0.0635246	0.236347	1
GO_PROTEIN_AUTOPHOSPHORYLATION	198	0.094067	1.49579	0.0776515	0.236036	1
GO_CELL_DIFFERENTIATION_IN_SPINAL_CORD	28	0.23943	1.49557	0.0782779	0.235745	1
GO_POSITIVE_REGULATION_OF_CELL_CYCLE_G2_M_PHASE_TRANSITION	26	0.245596	1.49546	0.0679012	0.235344	1
GO_REGULATION_OF_GLUCAN_BIOSYNTHETIC_PROCESS	22	0.261293	1.49541	0.08	0.234891	1
GO_MACROPHAGE_CHEMOTAXIS	22	0.262021	1.49264	0.06639	0.237268	1
GO_HOMEOSTASIS_OF_NUMBER_OF_CELLS	188	0.0938894	1.49063	0.0745968	0.238829	1
GO_PYRIMIDINE_NUCLEOSIDE_MONOPHOSPHATE_METABOLIC_PROCESS	16	0.306098	1.49012	0.0766283	0.238883	1
GO_POSITIVE_REGULATION_OF_DNA_BINDING_TRANSCRIPTION_FACTOR_ACTIVITY	201	0.0920141	1.48872	0.0735294	0.239847	1
GO_MESODERMAL_CELL_DIFFERENTIATION	20	0.280469	1.48535	0.0669291	0.242865	1
GO_NEGATIVE_REGULATION_OF_T_CELL_DIFFERENTIATION	32	0.221382	1.48516	0.0734127	0.242561	1
GO_REGULATION_OF_MUSCLE_ORGAN_DEVELOPMENT	95	0.132363	1.48416	0.065764	0.243088	1
GO_CELLULAR_RESPONSE_TO_BIOTIC_STIMULUS	155	0.103368	1.48377	0.0742972	0.243028	1
GO_TRANSCRIPTION_BY_RNA_POLYMERASE_III	49	0.180365	1.48346	0.0857143	0.24289	1
GO_BRANCHING_INVOLVED_IN_BLOOD_VESSEL_MORPHOGENESIS	24	0.247064	1.48229	0.0711462	0.243641	1
GO_NEUROBLAST_PROLIFERATION	44	0.18882	1.48113	0.0636183	0.244439	1
GO_NEGATIVE_REGULATION_OF_RESPONSE_TO_DNA_DAMAGE_STIMULUS	64	0.156363	1.47874	0.0880626	0.246588	1
GO_NCRNA_CATABOLIC_PROCESS	24	0.253787	1.47784	0.083682	0.246992	1
GO_MITOTIC_G2_M_TRANSITION_CHECKPOINT	24	0.255125	1.47746	0.0916667	0.246922	1
GO_REGULATION_OF_CENTROSOME_CYCLE	54	0.171218	1.47704	0.0714286	0.24687	1
GO_REGULATION_OF_LEUKOCYTE_DIFFERENTIATION	185	0.0944379	1.47613	0.08	0.247354	1
GO_RESPONSE_TO_VIRUS	213	0.0875517	1.47585	0.0805785	0.247145	1
GO_PROTEIN_DNA_COMPLEX_SUBUNIT_ORGANIZATION	186	0.0939478	1.47454	0.0792683	0.247991	1
GO_NEGATIVE_REGULATION_OF_VIRAL_GENOME_REPLICATION	35	0.205556	1.47402	0.0828402	0.248026	1
GO_REGULATION_OF_PRODUCTION_OF_SMALL_RNA_INVOLVED_IN_GENE_SILENCING_BY_RNA	19	0.282074	1.47357	0.0912951	0.24802	1
GO_RNA_CATABOLIC_PROCESS	347	0.0686048	1.47338	0.077381	0.247708	1
GO_DEFENSE_RESPONSE_TO_BACTERIUM	86	0.135627	1.4723	0.0690979	0.248393	1
GO_NEGATIVE_REGULATION_OF_NOTCH_SIGNALING_PATHWAY	37	0.203431	1.4712	0.0916179	0.249042	1
GO_PRI_MIRNA_TRANSCRIPTION_BY_RNA_POLYMERASE_II	36	0.20384	1.47094	0.0782443	0.248828	1
GO_ACTOMYOSIN_STRUCTURE_ORGANIZATION	148	0.104211	1.47037	0.0882957	0.248955	1
GO_SKELETAL_MUSCLE_CELL_DIFFERENTIATION	45	0.178467	1.46964	0.0709939	0.24927	1
Negatively enriched in NEL-CRE
NAME	SIZE	ES	NES	NOM p-val	FDR q-val	FWER p-val
GO_MACROAUTOPHAGY	260	-0.212894	-3.91885	0	0	0
GO_GOLGI_VESICLE_TRANSPORT	316	-0.189373	-3.8019	0	0	0
GO_ENDOPLASMIC_RETICULUM_TO_GOLGI_VESICLE_MEDIATED_TRANSPORT	172	-0.243883	-3.74905	0	0	0
GO_MONOVALENT_INORGANIC_CATION_TRANSPORT	333	-0.171679	-3.61282	0	0	0
GO_POST_TRANSLATIONAL_PROTEIN_MODIFICATION	290	-0.178947	-3.51561	0	0	0
GO_MONOVALENT_INORGANIC_CATION_HOMEOSTASIS	90	-0.307319	-3.46293	0	0	0
GO_RESPIRATORY_ELECTRON_TRANSPORT_CHAIN	95	-0.302238	-3.43532	0	0	0
GO_COFACTOR_METABOLIC_PROCESS	322	-0.164844	-3.36754	0	0	0
GO_ATP_SYNTHESIS_COUPLED_ELECTRON_TRANSPORT	78	-0.319635	-3.34409	0	0	0
GO_CELLULAR_RESPIRATION	155	-0.230397	-3.32592	0	0	0
GO_REGULATION_OF_TRANS_SYNAPTIC_SIGNALING	357	-0.154083	-3.28741	0	0	0
GO_MITOCHONDRIAL_ELECTRON_TRANSPORT_NADH_TO_UBIQUINONE	45	-0.406327	-3.2559	0	0	0
GO_SULFUR_COMPOUND_METABOLIC_PROCESS	284	-0.163579	-3.23385	0	0	0
GO_MITOCHONDRIAL_RESPIRATORY_CHAIN_COMPLEX_ASSEMBLY	82	-0.30519	-3.23277	0	0	0
GO_VESICLE_ORGANIZATION	275	-0.172289	-3.21623	0	0	0
GO_VESICLE_LOCALIZATION	187	-0.201597	-3.20398	0	0	0
GO_ELECTRON_TRANSPORT_CHAIN	142	-0.23393	-3.2029	0	0	0
GO_PROCESS_UTILIZING_AUTOPHAGIC_MECHANISM	428	-0.13514	-3.1912	0	0	0
GO_SMALL_MOLECULE_CATABOLIC_PROCESS	304	-0.158603	-3.15833	0	0	0
GO_DRUG_METABOLIC_PROCESS	343	-0.145224	-3.14661	0	0	0
GO_NEGATIVE_REGULATION_OF_PEPTIDASE_ACTIVITY	129	-0.24199	-3.14536	0	0	0
GO_MYELOID_LEUKOCYTE_MEDIATED_IMMUNITY	394	-0.137426	-3.10025	0	5.22249e-05	0.001
GO_REGULATION_OF_MEMBRANE_POTENTIAL	312	-0.153582	-3.07546	0	4.99543e-05	0.001
GO_CELLULAR_PROTEIN_COMPLEX_DISASSEMBLY	193	-0.182896	-3.05629	0	4.78729e-05	0.001
GO_L_GLUTAMATE_TRANSMEMBRANE_TRANSPORT	20	-0.566244	-3.04066	0	4.59579e-05	0.001
GO_VACUOLE_ORGANIZATION	142	-0.21599	-2.97979	0	0.000171663	0.004
GO_VACUOLAR_TRANSPORT	124	-0.22948	-2.97793	0	0.000165305	0.004
GO_SPHINGOLIPID_METABOLIC_PROCESS	131	-0.218397	-2.92802	0	0.000278595	0.007
GO_CELLULAR_MONOVALENT_INORGANIC_CATION_HOMEOSTASIS	68	-0.306581	-2.92599	0	0.000268988	0.007
GO_PROTEASOMAL_PROTEIN_CATABOLIC_PROCESS	431	-0.122036	-2.90385	0	0.000372788	0.01
GO_ANTIGEN_PROCESSING_AND_PRESENTATION	174	-0.183223	-2.86623	0	0.000541184	0.015
GO_PROTEIN_CONTAINING_COMPLEX_DISASSEMBLY	282	-0.15145	-2.86576	0	0.000524272	0.015
GO_VESICLE_BUDDING_FROM_MEMBRANE	90	-0.260069	-2.85872	0	0.000508385	0.015
GO_COGNITION	229	-0.162001	-2.85598	0	0.000493432	0.015
GO_OXIDATIVE_PHOSPHORYLATION	99	-0.249229	-2.84284	0	0.000573244	0.018
GO_NEUROTRANSMITTER_TRANSPORT	204	-0.17005	-2.84131	0	0.00055732	0.018
GO_MEMBRANE_LIPID_METABOLIC_PROCESS	173	-0.189319	-2.83731	0	0.000542258	0.018
GO_NADH_DEHYDROGENASE_COMPLEX_ASSEMBLY	54	-0.327214	-2.82989	0	0.000527988	0.018
GO_NUCLEOBASE_CONTAINING_SMALL_MOLECULE_METABOLIC_PROCESS	457	-0.114746	-2.82862	0	0.00051445	0.018
GO_ENERGY_DERIVATION_BY_OXIDATION_OF_ORGANIC_COMPOUNDS	218	-0.165845	-2.82725	0	0.000529817	0.019
GO_PROTEIN_FOLDING	180	-0.179322	-2.81821	0	0.000516895	0.019
GO_TRANSLATIONAL_ELONGATION	126	-0.211773	-2.81402	0	0.000558255	0.021
GO_AMINO_ACID_IMPORT	24	-0.483601	-2.80426	0	0.000571397	0.022
GO_AUTOPHAGOSOME_ORGANIZATION	80	-0.259239	-2.79256	0	0.000609474	0.024
GO_GENERATION_OF_PRECURSOR_METABOLITES_AND_ENERGY	386	-0.122477	-2.7789	0	0.000696087	0.028
GO_REGULATION_OF_MACROAUTOPHAGY	153	-0.197629	-2.76989	0	0.000730598	0.03
GO_MITOCHONDRIAL_TRANSLATIONAL_TERMINATION	87	-0.253852	-2.76887	0	0.000715054	0.03
GO_ENDOSOMAL_TRANSPORT	189	-0.170824	-2.76213	0	0.000723803	0.031
GO_PURINE_CONTAINING_COMPOUND_METABOLIC_PROCESS	331	-0.134253	-2.74061	0	0.000984465	0.043
GO_REGULATION_OF_NEUROTRANSMITTER_LEVELS	260	-0.144168	-2.72721	0	0.0011443	0.051
GO_REGULATION_OF_ION_TRANSMEMBRANE_TRANSPORT	336	-0.128725	-2.72271	0	0.00114313	0.052
GO_PHOSPHOLIPID_METABOLIC_PROCESS	345	-0.131668	-2.71496	0	0.00122874	0.057
GO_RIBOSE_PHOSPHATE_METABOLIC_PROCESS	313	-0.132319	-2.71288	0	0.00122691	0.058
GO_TRANSLATIONAL_TERMINATION	99	-0.23438	-2.71031	0	0.00120419	0.058
GO_PROTEIN_LOCALIZATION_TO_CELL_PERIPHERY	282	-0.140848	-2.70681	0	0.00124359	0.061
GO_REGULATION_OF_ION_TRANSPORT	467	-0.112755	-2.69418	0	0.00134179	0.067
GO_TRICARBOXYLIC_ACID_CYCLE	31	-0.406449	-2.69164	0	0.0013378	0.068
GO_SUBSTANTIA_NIGRA_DEVELOPMENT	33	-0.394214	-2.6858	0	0.001353	0.07
GO_CELLULAR_ION_HOMEOSTASIS	412	-0.117019	-2.68488	0	0.00136842	0.072
GO_VESICLE_MEDIATED_TRANSPORT_IN_SYNAPSE	181	-0.170562	-2.68014	0	0.00138373	0.074
GO_DRUG_TRANSPORT	119	-0.213271	-2.67345	0	0.0014168	0.077
GO_REGULATION_OF_TRANSMEMBRANE_TRANSPORT	396	-0.118263	-2.66356	0	0.00155626	0.085
GO_ORGANELLE_TRANSPORT_ALONG_MICROTUBULE	78	-0.258284	-2.6618	0	0.00158592	0.088
GO_GLYCEROPHOSPHOLIPID_METABOLIC_PROCESS	261	-0.143497	-2.66034	0	0.00159586	0.09
GO_GOLGI_VESICLE_BUDDING	72	-0.26251	-2.65796	0	0.00162383	0.093
GO_ORGANIC_ACID_CATABOLIC_PROCESS	196	-0.161912	-2.65516	0	0.00159923	0.093
GO_LIPID_MODIFICATION	192	-0.16216	-2.63849	0	0.00181004	0.106
GO_MEMBRANE_FUSION	113	-0.216579	-2.63414	0	0.00184895	0.11
GO_NEGATIVE_REGULATION_OF_PROTEOLYSIS	204	-0.161431	-2.62877	0	0.001904	0.115
GO_IMPORT_ACROSS_PLASMA_MEMBRANE	81	-0.24776	-2.60634	0	0.0021989	0.134
GO_ANTIGEN_PROCESSING_AND_PRESENTATION_OF_PEPTIDE_ANTIGEN	148	-0.183805	-2.60599	0	0.00216793	0.134
GO_REGULATION_OF_PH	59	-0.2887	-2.60467	0	0.00215317	0.135
GO_MYELOID_LEUKOCYTE_ACTIVATION	464	-0.106496	-2.60209	0	0.00218482	0.139
GO_SODIUM_ION_TRANSMEMBRANE_TRANSPORT	100	-0.225468	-2.59827	0	0.00218588	0.141
GO_CELLULAR_COMPONENT_DISASSEMBLY	452	-0.108019	-2.59548	0	0.00218713	0.143
GO_GLYCOPROTEIN_METABOLIC_PROCESS	333	-0.121551	-2.59024	0	0.00215836	0.143
GO_REGULATION_OF_SYNAPTIC_VESICLE_CYCLE	100	-0.221754	-2.5901	0	0.00213033	0.143
GO_VESICLE_TARGETING	85	-0.236602	-2.58773	0	0.0021313	0.145
GO_PROTEIN_TARGETING	373	-0.116961	-2.5802	0	0.00223157	0.153
GO_COPII_COATED_VESICLE_BUDDING	64	-0.278053	-2.57279	0.00200803	0.0023852	0.165
GO_MITOCHONDRION_ORGANIZATION	431	-0.107484	-2.55347	0	0.00265802	0.182
GO_BEHAVIOR	426	-0.105852	-2.5531	0	0.00262561	0.182
GO_SODIUM_ION_TRANSPORT	147	-0.179977	-2.54482	0	0.00268946	0.188
GO_MEMORY	95	-0.221841	-2.54182	0	0.00268452	0.19
GO_MITOCHONDRIAL_GENE_EXPRESSION	155	-0.175211	-2.53082	0	0.00286469	0.204
GO_ACIDIC_AMINO_ACID_TRANSPORT	53	-0.291685	-2.52317	0	0.00309179	0.218
GO_DRUG_TRANSMEMBRANE_TRANSPORT	54	-0.294105	-2.5177	0	0.00316048	0.225
GO_ENDOMEMBRANE_SYSTEM_ORGANIZATION	347	-0.119158	-2.51645	0	0.00317594	0.229
GO_METAL_ION_HOMEOSTASIS	406	-0.106201	-2.51055	0	0.00327897	0.238
GO_GLYCOSYLATION	212	-0.149341	-2.51042	0	0.00324253	0.238
GO_NEURON_CELLULAR_HOMEOSTASIS	24	-0.420311	-2.50351	0	0.00346512	0.252
GO_CELLULAR_TRANSITION_METAL_ION_HOMEOSTASIS	69	-0.252176	-2.50179	0.00194553	0.00351282	0.259
GO_CALCIUM_DEPENDENT_CELL_CELL_ADHESION_VIA_PLASMA_MEMBRANE_CELL_ADHESION_MOLECULES	38	-0.339435	-2.49656	0	0.00362003	0.27
GO_TRANSITION_METAL_ION_HOMEOSTASIS	83	-0.23329	-2.49376	0.00189394	0.00364242	0.275
GO_AEROBIC_RESPIRATION	70	-0.250687	-2.49346	0	0.00360408	0.275
GO_LYSOSOMAL_TRANSPORT	91	-0.223511	-2.49135	0.0019305	0.00364911	0.281
GO_HYDROGEN_PEROXIDE_CATABOLIC_PROCESS	15	-0.531215	-2.48055	0	0.00391271	0.299
GO_LATE_ENDOSOME_TO_VACUOLE_TRANSPORT	15	-0.521401	-2.4702	0	0.00438868	0.332
GO_SODIUM_ION_HOMEOSTASIS	23	-0.434922	-2.4534	0	0.00484328	0.361
GO_CELLULAR_AMINO_ACID_METABOLIC_PROCESS	236	-0.13806	-2.44876	0	0.00494082	0.367
GO_REGULATION_OF_RENAL_SYSTEM_PROCESS	19	-0.463915	-2.44753	0.00191939	0.00493639	0.37
GO_SYNAPTIC_VESICLE_TRANSPORT	42	-0.316278	-2.44129	0	0.00507581	0.385
GO_SYNAPTIC_TRANSMISSION_GLUTAMATERGIC	78	-0.232826	-2.4373	0	0.0052122	0.394
GO_ANTIGEN_PROCESSING_AND_PRESENTATION_OF_PEPTIDE_OR_POLYSACCHARIDE_ANTIGEN_VIA_MHC_CLASS_II	76	-0.236505	-2.43408	0	0.00529107	0.403
GO_MITOCHONDRIAL_TRANSLATION	131	-0.179748	-2.4327	0	0.00526197	0.403
GO_VESICLE_MEDIATED_TRANSPORT_TO_THE_PLASMA_MEMBRANE	80	-0.231624	-2.43148	0.0019084	0.00526514	0.403
GO_REGULATION_OF_ANATOMICAL_STRUCTURE_SIZE	374	-0.113294	-2.43127	0.00217391	0.00522663	0.404
GO_PHAGOSOME_ACIDIFICATION	16	-0.512617	-2.42496	0	0.00555212	0.428
GO_WOUND_HEALING	376	-0.107146	-2.42312	0	0.00556294	0.433
GO_REGULATION_OF_WOUND_HEALING	93	-0.211941	-2.4176	0	0.00573578	0.445
GO_ANION_TRANSMEMBRANE_TRANSPORT	200	-0.148255	-2.41625	0	0.00572483	0.446
GO_ORGANELLE_FUSION	105	-0.199809	-2.4152	0	0.00570414	0.447
GO_L_ALPHA_AMINO_ACID_TRANSMEMBRANE_TRANSPORT	43	-0.313328	-2.40349	0	0.00614046	0.473
GO_THIOESTER_BIOSYNTHETIC_PROCESS	47	-0.289709	-2.399	0	0.00630222	0.485
GO_SYNAPSE_ORGANIZATION	366	-0.106385	-2.3973	0	0.00633569	0.49
GO_ESTABLISHMENT_OF_LOCALIZATION_IN_CELL	426	-0.101473	-2.39597	0	0.00634839	0.495
GO_REGULATION_OF_CELLULAR_AMINE_METABOLIC_PROCESS	66	-0.254477	-2.39413	0.00408998	0.00637972	0.499
GO_VERY_LONG_CHAIN_FATTY_ACID_METABOLIC_PROCESS	23	-0.4211	-2.39043	0	0.00652551	0.514
GO_COENZYME_METABOLIC_PROCESS	201	-0.149277	-2.38923	0	0.00655527	0.521
GO_RESPONSE_TO_AMINO_ACID	95	-0.206498	-2.38905	0	0.00651002	0.521
GO_ANION_TRANSPORT	388	-0.105491	-2.3865	0	0.00653013	0.524
GO_THIOESTER_METABOLIC_PROCESS	80	-0.225401	-2.38258	0	0.00672555	0.538
GO_ADULT_LOCOMOTORY_BEHAVIOR	56	-0.261324	-2.37005	0	0.0073275	0.569
GO_POTASSIUM_ION_TRANSPORT	155	-0.166323	-2.36672	0.0019305	0.0074133	0.579
GO_RESPONSE_TO_ENDOPLASMIC_RETICULUM_STRESS	247	-0.132089	-2.36657	0.00193424	0.00736284	0.579
GO_REGULATION_OF_SYNAPTIC_VESICLE_RECYCLING	24	-0.398316	-2.36304	0	0.0075362	0.588
GO_VESICLE_TARGETING_TO_FROM_OR_WITHIN_GOLGI	68	-0.24026	-2.3488	0	0.00821999	0.62
GO_GLYCEROLIPID_METABOLIC_PROCESS	313	-0.118687	-2.34856	0.00207039	0.00817317	0.622
GO_AXO_DENDRITIC_TRANSPORT	64	-0.245982	-2.34854	0	0.00810981	0.622
GO_REGULATION_OF_CELLULAR_COMPONENT_SIZE	300	-0.114933	-2.34837	0	0.00806459	0.623
GO_NUCLEOSIDE_BISPHOSPHATE_METABOLIC_PROCESS	104	-0.195575	-2.34509	0.00196464	0.00817474	0.635
GO_REGULATION_OF_NEUROTRANSMITTER_TRANSPORT	110	-0.194343	-2.34369	0	0.00820713	0.641
GO_LIPID_CATABOLIC_PROCESS	213	-0.140188	-2.34313	0	0.00817908	0.641
GO_ADULT_BEHAVIOR	98	-0.201674	-2.34268	0	0.00814339	0.642
GO_NEGATIVE_REGULATION_OF_PROTEIN_POLYMERIZATION	56	-0.257227	-2.34007	0.00214133	0.00825551	0.648
GO_PROTON_TRANSMEMBRANE_TRANSPORT	89	-0.220531	-2.33474	0	0.00847444	0.66
GO_NEGATIVE_REGULATION_OF_WOUND_HEALING	49	-0.282823	-2.32769	0	0.00896758	0.683
GO_REGULATION_OF_SYNAPSE_STRUCTURE_OR_ACTIVITY	204	-0.137778	-2.32443	0	0.00913037	0.69
GO_CELLULAR_MODIFIED_AMINO_ACID_METABOLIC_PROCESS	125	-0.177187	-2.32132	0.00195695	0.00930586	0.697
GO_BARBED_END_ACTIN_FILAMENT_CAPPING	16	-0.479939	-2.31706	0	0.00955993	0.71
GO_COFACTOR_BIOSYNTHETIC_PROCESS	188	-0.144406	-2.3161	0.00210526	0.00955588	0.713
GO_PROTEIN_LOCALIZATION_TO_PLASMA_MEMBRANE	229	-0.134422	-2.31472	0	0.00955935	0.715
GO_CHLORIDE_TRANSPORT	60	-0.253519	-2.31315	0	0.00964966	0.719
GO_L_AMINO_ACID_TRANSPORT	53	-0.274014	-2.31285	0.002	0.00961409	0.72
GO_ESTABLISHMENT_OF_ORGANELLE_LOCALIZATION	353	-0.106772	-2.30422	0	0.0100961	0.738
GO_NUCLEAR_ENVELOPE_REASSEMBLY	18	-0.452205	-2.30142	0	0.0102424	0.747
GO_NEUROTRANSMITTER_UPTAKE	35	-0.320665	-2.30062	0	0.0102487	0.749
GO_REGULATION_OF_PROTEIN_LOCALIZATION_TO_MEMBRANE	157	-0.159309	-2.29024	0	0.0108855	0.767
GO_PHOSPHOLIPID_BIOSYNTHETIC_PROCESS	218	-0.133691	-2.29005	0.00376648	0.0108425	0.77
GO_INORGANIC_ION_IMPORT_ACROSS_PLASMA_MEMBRANE	55	-0.259899	-2.28628	0	0.0110548	0.777
GO_ORGANIC_ACID_TRANSPORT	210	-0.136032	-2.27597	0	0.0117467	0.802
GO_REGULATION_OF_COAGULATION	56	-0.256702	-2.2733	0	0.0118602	0.806
GO_ANTEROGRADE_AXONAL_TRANSPORT	44	-0.291317	-2.26754	0	0.0121882	0.817
GO_REGULATION_OF_VESICLE_MEDIATED_TRANSPORT	433	-0.0958939	-2.26071	0	0.0127346	0.831
GO_POSITIVE_REGULATION_OF_PROTEIN_LOCALIZATION_TO_MEMBRANE	100	-0.191932	-2.25663	0	0.0130268	0.839
GO_REGULATION_OF_EXOCYTOSIS	171	-0.148631	-2.25594	0.00198413	0.0130361	0.84
GO_BRANCHED_CHAIN_AMINO_ACID_METABOLIC_PROCESS	21	-0.415258	-2.25054	0	0.0133467	0.844
GO_NEGATIVE_REGULATION_OF_NEUROTRANSMITTER_TRANSPORT	19	-0.431845	-2.24518	0	0.0137304	0.854
GO_POST_GOLGI_VESICLE_MEDIATED_TRANSPORT	91	-0.198704	-2.24119	0.00199601	0.0139265	0.858
GO_NEGATIVE_REGULATION_OF_ACTIN_FILAMENT_POLYMERIZATION	42	-0.286813	-2.23068	0	0.0149233	0.879
GO_FATTY_ACYL_COA_BIOSYNTHETIC_PROCESS	26	-0.367208	-2.22748	0.00203252	0.0152134	0.884
GO_ANTIBIOTIC_METABOLIC_PROCESS	62	-0.245736	-2.2264	0.00394477	0.0152159	0.887
GO_ESTABLISHMENT_OF_PROTEIN_LOCALIZATION_TO_MEMBRANE	278	-0.115513	-2.22372	0	0.0153569	0.892
GO_TRANSFERRIN_TRANSPORT	27	-0.349477	-2.22157	0.00399202	0.0154823	0.895
GO_CELLULAR_AMINO_ACID_CATABOLIC_PROCESS	83	-0.206606	-2.21984	0.00397614	0.0155787	0.897
GO_PROTEIN_LOCALIZATION_TO_SYNAPSE	78	-0.214423	-2.2194	0.00211864	0.0155392	0.898
GO_REGULATION_OF_POSTSYNAPSE_ORGANIZATION	93	-0.201652	-2.2183	0	0.015581	0.9
GO_ACTIN_FILAMENT_DEPOLYMERIZATION	42	-0.286214	-2.21525	0.00421053	0.015803	0.904
GO_ATP_METABOLIC_PROCESS	225	-0.127261	-2.21345	0	0.0158558	0.906
GO_MONOCARBOXYLIC_ACID_METABOLIC_PROCESS	433	-0.0940323	-2.21154	0.00603622	0.0159475	0.908
GO_LIPID_OXIDATION	81	-0.208675	-2.2113	0	0.0158739	0.908
GO_GLYCOPROTEIN_BIOSYNTHETIC_PROCESS	275	-0.114262	-2.20192	0	0.0168052	0.924
GO_PH_REDUCTION	34	-0.323322	-2.20088	0.00205339	0.0168378	0.926
GO_CELL_REDOX_HOMEOSTASIS	62	-0.235813	-2.19986	0	0.0169211	0.927
GO_REGULATION_OF_SYNAPTIC_VESICLE_ENDOCYTOSIS	16	-0.449958	-2.19962	0.0038835	0.0168374	0.928
GO_RESPONSE_TO_ACID_CHEMICAL	241	-0.120877	-2.19664	0	0.0170669	0.931
GO_PLATELET_DEGRANULATION	93	-0.194507	-2.19224	0	0.0174961	0.939
GO_ESTABLISHMENT_OF_PIGMENT_GRANULE_LOCALIZATION	20	-0.414315	-2.19	0	0.0177259	0.944
GO_NEGATIVE_REGULATION_OF_SYNAPTIC_TRANSMISSION	58	-0.242987	-2.18961	0.00787402	0.0176521	0.944
GO_HYDROGEN_PEROXIDE_METABOLIC_PROCESS	29	-0.343994	-2.18884	0	0.0176473	0.944
GO_DETOXIFICATION	70	-0.222829	-2.18519	0.00206186	0.0179895	0.946
GO_REGULATION_OF_RESPONSE_TO_WOUNDING	118	-0.171945	-2.184	0.0021097	0.0180077	0.947
GO_REGULATION_OF_CELLULAR_AMINO_ACID_METABOLIC_PROCESS	54	-0.249177	-2.17379	0	0.0191713	0.955
GO_REGULATION_OF_PEPTIDASE_ACTIVITY	270	-0.115165	-2.16683	0	0.0199641	0.958
GO_REGULATION_OF_VACUOLE_ORGANIZATION	38	-0.296058	-2.16568	0.00395257	0.0201045	0.96
GO_PIGMENT_GRANULE_LOCALIZATION	22	-0.387059	-2.16032	0.00390625	0.0207012	0.965
GO_ALPHA_AMINO_ACID_METABOLIC_PROCESS	130	-0.16234	-2.15347	0.00203666	0.0214476	0.97
GO_POSITIVE_REGULATION_OF_ION_TRANSPORT	178	-0.135389	-2.15094	0.00191205	0.021667	0.97
GO_FATTY_ACID_METABOLIC_PROCESS	249	-0.11846	-2.14888	0.00607287	0.0218662	0.97
GO_TRANSITION_METAL_ION_TRANSPORT	86	-0.196037	-2.14827	0	0.0218159	0.97
GO_RECEPTOR_LOCALIZATION_TO_SYNAPSE	54	-0.246934	-2.14266	0.0021322	0.0224249	0.971
GO_ENDOSOME_ORGANIZATION	65	-0.229813	-2.14071	0	0.0226358	0.971
GO_NEGATIVE_REGULATION_OF_RESPONSE_TO_WOUNDING	61	-0.230835	-2.13676	0.00616016	0.0230791	0.976
GO_LEARNING	115	-0.171181	-2.12141	0.00596422	0.0254504	0.984
GO_CARDIAC_CONDUCTION	102	-0.176307	-2.11994	0.00209205	0.0255618	0.985
GO_CELLULAR_LIPID_CATABOLIC_PROCESS	154	-0.148605	-2.11287	0.00408163	0.0266497	0.988
GO_LONG_TERM_MEMORY	26	-0.339664	-2.11276	0.00423729	0.0265373	0.988
GO_MULTICELLULAR_ORGANISMAL_SIGNALING	138	-0.156864	-2.11202	0.00191205	0.0265445	0.989
GO_GLUTATHIONE_METABOLIC_PROCESS	38	-0.290185	-2.10155	0.0039604	0.0281622	0.993
GO_REGULATION_OF_COFACTOR_METABOLIC_PROCESS	27	-0.337568	-2.10031	0.00196464	0.0281955	0.993
GO_SYNAPTIC_TRANSMISSION_GABAERGIC	34	-0.310276	-2.09908	0.00208333	0.0282831	0.994
GO_AMINO_ACID_TRANSPORT	107	-0.17769	-2.09521	0.00408998	0.0287037	0.994
GO_RIBONUCLEOSIDE_METABOLIC_PROCESS	49	-0.246975	-2.09344	0.00612245	0.0289379	0.994
GO_ANTIBIOTIC_CATABOLIC_PROCESS	29	-0.330314	-2.09308	0.00194175	0.0288181	0.994
GO_CELLULAR_DETOXIFICATION	65	-0.217224	-2.09262	0.00204499	0.0287375	0.994
GO_FATTY_ACID_CATABOLIC_PROCESS	82	-0.198087	-2.0905	0.00400802	0.0289838	0.995
GO_REGULATION_OF_AUTOPHAGY	282	-0.108033	-2.08816	0.00421941	0.0292661	0.995
GO_REGULATION_OF_RESPONSE_TO_ENDOPLASMIC_RETICULUM_STRESS	79	-0.199316	-2.08765	0.00210084	0.029195	0.995
GO_RESPONSE_TO_ETHANOL	79	-0.200868	-2.08728	0	0.0291089	0.995
GO_CERAMIDE_METABOLIC_PROCESS	73	-0.206377	-2.08618	0	0.0291677	0.995
GO_FC_RECEPTOR_SIGNALING_PATHWAY	159	-0.140599	-2.07748	0.00213675	0.0306079	0.997
GO_GLYCOSYL_COMPOUND_METABOLIC_PROCESS	88	-0.190968	-2.0772	0.00956023	0.0305008	0.997
GO_ERAD_PATHWAY	89	-0.191177	-2.07599	0.00203252	0.0305676	0.997
GO_REGULATION_OF_SYNAPTIC_PLASTICITY	162	-0.141368	-2.07569	0	0.0304776	0.997
GO_REGULATION_OF_CARDIAC_CONDUCTION	52	-0.244919	-2.07077	0.00616016	0.0313544	0.998
GO_ORGANIC_HYDROXY_COMPOUND_METABOLIC_PROCESS	343	-0.0957141	-2.06997	0.00203252	0.0313752	0.998
GO_REGULATION_OF_PROTEASOMAL_PROTEIN_CATABOLIC_PROCESS	166	-0.135823	-2.06846	0.00400802	0.0315455	0.998
GO_REGULATION_OF_NEURONAL_SYNAPTIC_PLASTICITY	49	-0.251087	-2.06758	0.00403226	0.0315186	0.998
GO_REGULATION_OF_TRANSLATIONAL_INITIATION	68	-0.21528	-2.06673	0	0.0315228	0.999
GO_REGULATION_OF_POSTSYNAPTIC_MEMBRANE_POTENTIAL	105	-0.170169	-2.06605	0.00194175	0.0315229	0.999
GO_AMINE_METABOLIC_PROCESS	97	-0.176715	-2.06598	0.00403226	0.0313905	0.999
GO_NEGATIVE_REGULATION_OF_ACTIN_FILAMENT_DEPOLYMERIZATION	29	-0.322737	-2.06002	0.00193424	0.0322379	0.999
GO_NEGATIVE_REGULATION_OF_CELL_MATRIX_ADHESION	34	-0.297868	-2.05849	0.0078125	0.0323795	0.999
GO_AMMONIUM_ION_METABOLIC_PROCESS	141	-0.146968	-2.05697	0.00204499	0.0325039	0.999
GO_DRUG_CATABOLIC_PROCESS	65	-0.220826	-2.05557	0	0.0326736	0.999
GO_PEPTIDYL_THREONINE_DEPHOSPHORYLATION	16	-0.421397	-2.0548	0.00619835	0.0327077	0.999
GO_NEGATIVE_REGULATION_OF_PROTEIN_CONTAINING_COMPLEX_ASSEMBLY	102	-0.175391	-2.05108	0.00404858	0.0332846	1
GO_RESPONSE_TO_WOUNDING	462	-0.083416	-2.04924	0.00205761	0.0335466	1
GO_ORGANELLE_MEMBRANE_FUSION	83	-0.192702	-2.04352	0.00572519	0.034551	1
GO_MULTIVESICULAR_BODY_SORTING_PATHWAY	30	-0.301315	-2.04015	0.00400802	0.0352209	1
GO_REGULATION_OF_PROTEIN_CATABOLIC_PROCESS	334	-0.098058	-2.03907	0.0121951	0.0353253	1
GO_PLATELET_ACTIVATION	116	-0.160031	-2.03904	0.00601202	0.035173	1
GO_SYNAPTIC_VESICLE_LOCALIZATION	55	-0.235735	-2.03555	0	0.0357618	1
GO_SYNAPTIC_VESICLE_EXOCYTOSIS	98	-0.17147	-2.03049	0.00567108	0.0366168	1
GO_DIVALENT_INORGANIC_CATION_TRANSPORT	335	-0.0958068	-2.02699	0.002	0.0372671	1
GO_REGULATION_OF_ER_TO_GOLGI_VESICLE_MEDIATED_TRANSPORT	15	-0.438008	-2.02578	0	0.0373898	1
GO_PEROXISOME_ORGANIZATION	66	-0.207147	-2.02316	0	0.0378156	1
GO_NEGATIVE_REGULATION_OF_RESPONSE_TO_DRUG	24	-0.339206	-2.02017	0.00208333	0.0383584	1
GO_NEUROTRANSMITTER_SECRETION	136	-0.151988	-2.01867	0.00588235	0.0384893	1
GO_NEURAL_NUCLEUS_DEVELOPMENT	46	-0.253798	-2.01609	0.00197628	0.0388338	1
GO_PIGMENT_METABOLIC_PROCESS	50	-0.240052	-2.01469	0.00801603	0.0390499	1
GO_REGULATION_OF_SYSTEMIC_ARTERIAL_BLOOD_PRESSURE	42	-0.260294	-2.01459	0.00393701	0.0388978	1
GO_NEGATIVE_REGULATION_OF_BLOOD_VESSEL_DIAMETER	49	-0.245005	-2.0134	0.00199601	0.0389553	1
GO_DICARBOXYLIC_ACID_TRANSPORT	64	-0.218378	-2.01253	0.00590551	0.0390396	1
GO_AMINO_ACID_TRANSMEMBRANE_TRANSPORT	61	-0.218017	-2.00404	0.0060241	0.0407751	1
GO_REGULATION_OF_PROTEIN_AUTOPHOSPHORYLATION	40	-0.266933	-2.00043	0.00792079	0.0415351	1
GO_GAMMA_AMINOBUTYRIC_ACID_SIGNALING_PATHWAY	20	-0.380645	-1.99977	0.00403226	0.0414984	1
GO_LIPOPROTEIN_METABOLIC_PROCESS	100	-0.174434	-1.99875	0.00196464	0.0416159	1
GO_RAB_PROTEIN_SIGNAL_TRANSDUCTION	57	-0.223852	-1.99597	0.00612245	0.04216	1
GO_SULFUR_COMPOUND_BIOSYNTHETIC_PROCESS	157	-0.138998	-1.99574	0.00801603	0.0420407	1
GO_REGULATION_OF_BLOOD_CIRCULATION	185	-0.125224	-1.99532	0.00595238	0.0420114	1
GO_INTRA_GOLGI_VESICLE_MEDIATED_TRANSPORT	29	-0.308144	-1.99297	0.00411523	0.042401	1
GO_PROTEIN_MANNOSYLATION	20	-0.379123	-1.99183	0.003663	0.0424594	1
GO_GOLGI_TO_PLASMA_MEMBRANE_TRANSPORT	52	-0.234999	-1.9905	0.0177515	0.0426809	1
GO_CIRCULATORY_SYSTEM_PROCESS	335	-0.094176	-1.9856	0.00196464	0.0437645	1
GO_RESPONSE_TO_INCREASED_OXYGEN_LEVELS	21	-0.365595	-1.98474	0.00792079	0.0437912	1
GO_REACTIVE_OXYGEN_SPECIES_METABOLIC_PROCESS	187	-0.124244	-1.97977	0.00847458	0.0449297	1
GO_ORGANOPHOSPHATE_BIOSYNTHETIC_PROCESS	457	-0.0801128	-1.97849	0.006	0.0451121	1
GO_REGULATION_OF_PROTEIN_POLYMERIZATION	177	-0.132846	-1.97618	0.00628931	0.0455356	1
GO_EXOCYTIC_PROCESS	72	-0.197497	-1.976	0.00387597	0.0454165	1
GO_PROTEIN_TARGETING_TO_MEMBRANE	167	-0.133541	-1.97532	0.00403226	0.0454918	1
GO_REGULATION_OF_PROTEIN_CONTAINING_COMPLEX_ASSEMBLY	344	-0.0943267	-1.97443	0.00628931	0.0456308	1
GO_REGULATION_OF_RESPONSE_TO_DRUG	66	-0.21105	-1.97292	0.00578035	0.0458963	1
GO_AMINE_TRANSPORT	52	-0.238883	-1.97083	0	0.0463346	1
GO_ACTIN_POLYMERIZATION_OR_DEPOLYMERIZATION	165	-0.130853	-1.97013	0.0020284	0.046384	1
GO_HEART_PROCESS	194	-0.120337	-1.97011	0.0117417	0.0462221	1
GO_REGULATION_OF_LONG_TERM_NEURONAL_SYNAPTIC_PLASTICITY	24	-0.343255	-1.96968	0.00790514	0.0461671	1
GO_REGULATION_OF_MITOCHONDRIAL_MEMBRANE_POTENTIAL	55	-0.223267	-1.96795	0.00197239	0.046447	1
GO_TISSUE_REGENERATION	48	-0.239548	-1.96162	0.00195312	0.0481137	1
GO_SPHINGOLIPID_BIOSYNTHETIC_PROCESS	86	-0.179422	-1.96109	0.00980392	0.0480815	1
GO_SIGNAL_RELEASE	322	-0.0967922	-1.96044	0.00804829	0.0480898	1
GO_LONG_CHAIN_FATTY_ACYL_COA_BIOSYNTHETIC_PROCESS	17	-0.40094	-1.95821	0.008	0.0485699	1
GO_PROTEIN_POLYMERIZATION	220	-0.114418	-1.95436	0.0078125	0.0495189	1
GO_CELLULAR_KETONE_METABOLIC_PROCESS	171	-0.129546	-1.95382	0.00990099	0.049502	1
GO_REGULATION_OF_AMINO_ACID_TRANSPORT	21	-0.356769	-1.95322	0.00385356	0.0495426	1
GO_REGULATION_OF_DNA_TEMPLATED_TRANSCRIPTION_INITIATION	30	-0.300377	-1.95321	0.00796813	0.0493631	1
GO_REGULATION_OF_NEUROTRANSMITTER_UPTAKE	15	-0.416537	-1.95305	0.00392927	0.0492336	1
GO_AMMONIUM_TRANSPORT	60	-0.217122	-1.9516	0.00558659	0.0494645	1
GO_REGULATION_OF_AUTOPHAGOSOME_ASSEMBLY	33	-0.27836	-1.94735	0.00191939	0.0505953	1
GO_NEGATIVE_REGULATION_OF_TRANSPORT	336	-0.0946476	-1.94551	0.00824742	0.0508834	1
GO_REGULATION_OF_PROTEIN_DEPOLYMERIZATION	66	-0.203316	-1.94529	0.00647948	0.0507787	1
GO_LOCOMOTORY_BEHAVIOR	142	-0.139665	-1.94414	0.00419287	0.0509297	1
GO_REGULATION_OF_BODY_FLUID_LEVELS	322	-0.0945766	-1.94251	0.00804829	0.0512127	1
GO_DENDRITE_MORPHOGENESIS	132	-0.144598	-1.94205	0.00595238	0.0511273	1
GO_ASSOCIATIVE_LEARNING	56	-0.220576	-1.94022	0.0040568	0.0514129	1
GO_NEGATIVE_REGULATION_OF_HYDROLASE_ACTIVITY	285	-0.100652	-1.93211	0.00974659	0.053672	1
GO_REGULATION_OF_PLASMA_LIPOPROTEIN_PARTICLE_LEVELS	56	-0.220801	-1.93139	0.0115607	0.0537158	1
GO_RESPONSE_TO_XENOBIOTIC_STIMULUS	167	-0.126661	-1.92993	0	0.0539429	1
GO_ACTIN_NUCLEATION	38	-0.263063	-1.9289	0.00847458	0.0540251	1
GO_NUCLEOSIDE_METABOLIC_PROCESS	73	-0.198791	-1.92836	0.00956023	0.0540513	1
GO_GUANOSINE_CONTAINING_COMPOUND_METABOLIC_PROCESS	33	-0.280837	-1.92828	0.0077821	0.0538925	1
GO_REGULATION_OF_TRANSPORTER_ACTIVITY	205	-0.113541	-1.9259	0.00576923	0.0543637	1
GO_PURINE_NUCLEOSIDE_METABOLIC_PROCESS	46	-0.242913	-1.92184	0.0121212	0.055449	1
GO_POTASSIUM_ION_HOMEOSTASIS	20	-0.354816	-1.92179	0.0041841	0.0552715	1
GO_FC_EPSILON_RECEPTOR_SIGNALING_PATHWAY	102	-0.160213	-1.9214	0.0123711	0.0552059	1
GO_REGULATION_OF_PROTEASOMAL_UBIQUITIN_DEPENDENT_PROTEIN_CATABOLIC_PROCESS	115	-0.150775	-1.9201	0.00621118	0.0553913	1
GO_MULTIVESICULAR_BODY_ORGANIZATION	28	-0.307753	-1.91922	0.00391389	0.0554541	1
GO_SERINE_FAMILY_AMINO_ACID_METABOLIC_PROCESS	26	-0.312043	-1.916	0.0118577	0.0562923	1
GO_NEURON_DEATH_IN_RESPONSE_TO_OXIDATIVE_STRESS	23	-0.331922	-1.91431	0.0063425	0.0566972	1
GO_RESPONSE_TO_TOPOLOGICALLY_INCORRECT_PROTEIN	173	-0.124	-1.91397	0.00203666	0.0565909	1
GO_MITOCHONDRION_MORPHOGENESIS	20	-0.353979	-1.91132	0.00785855	0.0572967	1
GO_POSITIVE_REGULATION_OF_SODIUM_ION_TRANSPORT	32	-0.281905	-1.91097	0.0095057	0.0572225	1
GO_RESPONSE_TO_OXIDATIVE_STRESS	346	-0.0896935	-1.90746	0.012	0.0581669	1
GO_IRON_ION_HOMEOSTASIS	55	-0.209289	-1.90588	0.00601202	0.0584302	1
GO_REGULATION_OF_SUPRAMOLECULAR_FIBER_ORGANIZATION	285	-0.09639	-1.90578	0.00804829	0.0582824	1
GO_POSITIVE_REGULATION_OF_PHOSPHOLIPID_METABOLIC_PROCESS	38	-0.263889	-1.90575	0.00585938	0.058092	1
GO_NUCLEOSIDE_PHOSPHATE_BIOSYNTHETIC_PROCESS	201	-0.114992	-1.90539	0.00817996	0.0580013	1
GO_RIBONUCLEOTIDE_CATABOLIC_PROCESS	27	-0.308219	-1.90393	0.0104384	0.0582566	1
GO_POSITIVE_REGULATION_OF_DNA_TEMPLATED_TRANSCRIPTION_INITIATION	22	-0.347837	-1.90029	0.010352	0.0593025	1
GO_REGULATION_OF_SYSTEM_PROCESS	379	-0.0856562	-1.89841	0.00431965	0.0598728	1
GO_VESICLE_DOCKING	58	-0.207391	-1.89823	0.0142566	0.059738	1
GO_RESPONSE_TO_NERVE_GROWTH_FACTOR	45	-0.238027	-1.89706	0.0137795	0.0599023	1
GO_BASEMENT_MEMBRANE_ORGANIZATION	24	-0.333523	-1.89611	0.0121704	0.0600407	1
GO_CELL_COMMUNICATION_BY_ELECTRICAL_COUPLING	24	-0.316111	-1.89417	0.0114723	0.0605248	1
GO_ORGANIC_ACID_TRANSMEMBRANE_TRANSPORT	102	-0.157957	-1.89379	0.0120724	0.0604713	1
GO_LOCALIZATION_WITHIN_MEMBRANE	83	-0.175972	-1.89199	0.0162933	0.0608402	1
GO_MONOCARBOXYLIC_ACID_CATABOLIC_PROCESS	99	-0.1626	-1.89168	0.00627615	0.0607583	1
GO_RESPONSE_TO_STARVATION	142	-0.132912	-1.89098	0.008	0.0608635	1
GO_POSITIVE_REGULATION_OF_TRANSCRIPTION_INITIATION_FROM_RNA_POLYMERASE_II_PROMOTER	15	-0.399227	-1.88879	0.0117647	0.0614678	1
GO_REGULATION_OF_SYNAPTIC_VESICLE_EXOCYTOSIS	67	-0.192997	-1.88652	0.0077821	0.0620078	1
GO_NUCLEOSIDE_BISPHOSPHATE_BIOSYNTHETIC_PROCESS	61	-0.207068	-1.88587	0.0115163	0.0620377	1
GO_CELLULAR_AMINO_ACID_BIOSYNTHETIC_PROCESS	61	-0.203735	-1.88529	0.00959693	0.0620546	1
GO_REGULATION_OF_ANION_TRANSMEMBRANE_TRANSPORT	21	-0.340414	-1.88396	0.00196464	0.0623032	1
GO_PROTEIN_TRANSMEMBRANE_TRANSPORT	53	-0.218481	-1.87967	0.0104384	0.0635977	1
GO_RESPONSE_TO_DSRNA	33	-0.273104	-1.87917	0.0124224	0.0635853	1
GO_CELL_COMMUNICATION_INVOLVED_IN_CARDIAC_CONDUCTION	40	-0.25073	-1.87851	0.00606061	0.0635593	1
GO_CARBOHYDRATE_DERIVATIVE_CATABOLIC_PROCESS	143	-0.135696	-1.87699	0.00972763	0.0639415	1
GO_INSULIN_RECEPTOR_SIGNALING_PATHWAY	109	-0.152945	-1.87659	0.00616016	0.0638838	1
GO_NEGATIVE_REGULATION_OF_RESPONSE_TO_ENDOPLASMIC_RETICULUM_STRESS	41	-0.254263	-1.87559	0.01	0.0640849	1
GO_VESICLE_CYTOSKELETAL_TRAFFICKING	49	-0.230807	-1.86874	0.016129	0.06645	1
GO_RECEPTOR_MEDIATED_ENDOCYTOSIS	195	-0.113235	-1.86679	0.00776699	0.0669609	1
GO_REGULATION_OF_NEUROTRANSMITTER_SECRETION	85	-0.171424	-1.86673	0.0102459	0.0667794	1
GO_INORGANIC_ANION_TRANSMEMBRANE_TRANSPORT	65	-0.202794	-1.86558	0.016129	0.0669728	1
GO_SYNAPSE_ASSEMBLY	154	-0.128562	-1.86413	0.00421053	0.0673118	1
GO_ENDOPLASMIC_RETICULUM_CALCIUM_ION_HOMEOSTASIS	21	-0.346123	-1.86235	0.00591716	0.0678076	1
GO_PHOSPHATIDYLINOSITOL_METABOLIC_PROCESS	148	-0.131105	-1.86229	0.015534	0.0676289	1
GO_RENAL_SYSTEM_PROCESS	75	-0.188384	-1.86173	0.0194553	0.0676253	1
GO_HORMONE_METABOLIC_PROCESS	103	-0.15384	-1.86093	0.0176125	0.0676945	1
GO_COAGULATION	222	-0.106309	-1.8571	0.012	0.0690664	1
GO_MIDBRAIN_DEVELOPMENT	61	-0.200967	-1.85505	0.00398406	0.0696314	1
GO_NUCLEOTIDE_EXCISION_REPAIR_DNA_DAMAGE_RECOGNITION	22	-0.335515	-1.8549	0.0116959	0.0695062	1
GO_PROTEIN_TARGETING_TO_LYSOSOME	17	-0.372356	-1.85394	0.0157791	0.0695813	1
GO_CELLULAR_RESPONSE_TO_INSULIN_STIMULUS	167	-0.125125	-1.84528	0.0119284	0.0726791	1
GO_PURINE_CONTAINING_COMPOUND_CATABOLIC_PROCESS	41	-0.247832	-1.84388	0.0119048	0.0730568	1
GO_PRESYNAPSE_ORGANIZATION	39	-0.248686	-1.84294	0.00406504	0.0732318	1
GO_NEGATIVE_REGULATION_OF_RECEPTOR_MEDIATED_ENDOCYTOSIS	21	-0.343655	-1.84001	0.0130435	0.0742012	1
GO_DIVALENT_INORGANIC_CATION_HOMEOSTASIS	317	-0.0882769	-1.8398	0.0101833	0.0740778	1
GO_NEUROTRANSMITTER_REUPTAKE	19	-0.353209	-1.83941	0.0153551	0.0739812	1
GO_REGULATION_OF_REACTIVE_OXYGEN_SPECIES_METABOLIC_PROCESS	133	-0.133576	-1.83762	0.0141129	0.0744318	1
GO_PURINE_CONTAINING_COMPOUND_BIOSYNTHETIC_PROCESS	145	-0.129387	-1.83466	0.0133843	0.0753443	1
GO_NEGATIVE_REGULATION_OF_COAGULATION	34	-0.259824	-1.82849	0.0177866	0.0777449	1
GO_RESPONSE_TO_METAL_ION	260	-0.0971972	-1.82764	0.0101833	0.0778975	1
GO_NEGATIVE_REGULATION_OF_CAMP_MEDIATED_SIGNALING	17	-0.379564	-1.82692	0.0115607	0.0780387	1
GO_GLYCEROLIPID_BIOSYNTHETIC_PROCESS	204	-0.111583	-1.82665	0.0160321	0.0779418	1
GO_VESICLE_CARGO_LOADING	17	-0.376318	-1.8261	0.0146751	0.0779159	1
GO_ENDOCYTOSIS	429	-0.0770674	-1.82447	0.0114504	0.0783904	1
GO_REGULATION_OF_SODIUM_ION_TRANSMEMBRANE_TRANSPORT	52	-0.212053	-1.82147	0.016129	0.0795078	1
GO_EXCRETION	26	-0.297301	-1.8205	0.0135397	0.0797003	1
GO_NUCLEOSIDE_TRIPHOSPHATE_METABOLIC_PROCESS	72	-0.183281	-1.8176	0.0179641	0.0807065	1
GO_MEMBRANE_LIPID_BIOSYNTHETIC_PROCESS	123	-0.14027	-1.81628	0.00574713	0.0810432	1
GO_REGULATION_OF_PHOSPHOPROTEIN_PHOSPHATASE_ACTIVITY	96	-0.162531	-1.81406	0.00835073	0.0817597	1
GO_CELLULAR_RESPONSE_TO_LIPOPROTEIN_PARTICLE_STIMULUS	25	-0.301685	-1.81391	0.0153551	0.0815987	1
GO_VESICLE_DOCKING_INVOLVED_IN_EXOCYTOSIS	43	-0.236924	-1.81246	0.0216963	0.0819926	1
GO_C4_DICARBOXYLATE_TRANSPORT	17	-0.360234	-1.81174	0.0160321	0.0821501	1
GO_CYTOSKELETON_DEPENDENT_INTRACELLULAR_TRANSPORT	165	-0.122866	-1.81051	0.0119284	0.0824811	1
GO_REGULATION_OF_SODIUM_ION_TRANSPORT	71	-0.184581	-1.81012	0.0117417	0.0824489	1
GO_CYTOCHROME_COMPLEX_ASSEMBLY	29	-0.281712	-1.80981	0.0122699	0.0823467	1
GO_SCF_DEPENDENT_PROTEASOMAL_UBIQUITIN_DEPENDENT_PROTEIN_CATABOLIC_PROCESS	86	-0.167913	-1.80928	0.0217822	0.0823613	1
GO_ESTABLISHMENT_OF_MITOCHONDRION_LOCALIZATION	24	-0.308032	-1.8079	0.015534	0.0827459	1
GO_POSITIVE_REGULATION_OF_PROTEIN_CATABOLIC_PROCESS	189	-0.11388	-1.80635	0.0204499	0.0832322	1
GO_RECEPTOR_METABOLIC_PROCESS	157	-0.124742	-1.80494	0.0170455	0.0836454	1
GO_GOLGI_ORGANIZATION	114	-0.144899	-1.8048	0.0127119	0.0834778	1
GO_REGULATION_OF_METAL_ION_TRANSPORT	265	-0.0957575	-1.80314	0.00931099	0.0839359	1
GO_LONG_TERM_SYNAPTIC_POTENTIATION	72	-0.178949	-1.80282	0.0137795	0.0838284	1
GO_RESPONSE_TO_MUSCLE_ACTIVITY	19	-0.345565	-1.80132	0.0146751	0.0842842	1
GO_REGULATION_OF_PROTEIN_LOCALIZATION_TO_SYNAPSE	25	-0.300338	-1.79657	0.0173077	0.0862049	1
GO_POSTSYNAPSE_ORGANIZATION	150	-0.125913	-1.79544	0.0185567	0.086453	1
GO_ACTIN_FILAMENT_POLYMERIZATION	140	-0.132137	-1.79481	0.0103734	0.0865126	1
GO_MITOCHONDRIAL_FUSION	21	-0.331389	-1.79286	0.0219124	0.0871783	1
GO_RESPONSE_TO_THYROID_HORMONE	19	-0.331537	-1.79257	0.012474	0.0871148	1
GO_PIGMENT_BIOSYNTHETIC_PROCESS	44	-0.231736	-1.79099	0.0134615	0.0875954	1
GO_UBIQUITIN_DEPENDENT_ERAD_PATHWAY	71	-0.17835	-1.79046	0.0106383	0.0876129	1
GO_REGULATION_OF_ACTIN_FILAMENT_ORGANIZATION	207	-0.107544	-1.79016	0.00608519	0.0875186	1
GO_CHAPERONE_MEDIATED_AUTOPHAGY	16	-0.364519	-1.78957	0.0144928	0.0875152	1
GO_NEGATIVE_REGULATION_OF_CYSTEINE_TYPE_ENDOPEPTIDASE_ACTIVITY	65	-0.189895	-1.78729	0.0139721	0.0883341	1
GO_ALCOHOL_METABOLIC_PROCESS	255	-0.097707	-1.78729	0.0241935	0.0881052	1
GO_CELLULAR_IRON_ION_HOMEOSTASIS	44	-0.227511	-1.78468	0.0191939	0.0891173	1
GO_RIBOSE_PHOSPHATE_BIOSYNTHETIC_PROCESS	141	-0.132129	-1.78214	0.0201207	0.0900669	1
GO_VIRION_ASSEMBLY	36	-0.254836	-1.78166	0.0168067	0.0900636	1
GO_POSITIVE_REGULATION_OF_SECRETION	273	-0.0943917	-1.78152	0.0111732	0.0899133	1
GO_NEGATIVE_REGULATION_OF_CELLULAR_RESPONSE_TO_GROWTH_FACTOR_STIMULUS	107	-0.148643	-1.77874	0.00956023	0.0909971	1
GO_IMMUNE_RESPONSE_REGULATING_CELL_SURFACE_RECEPTOR_SIGNALING_PATHWAY	264	-0.0925368	-1.77849	0.015534	0.0908567	1
GO_REGULATION_OF_CELLULAR_PROTEIN_LOCALIZATION	466	-0.0740192	-1.77829	0.0215686	0.0906941	1
GO_FATTY_ACID_BETA_OXIDATION	60	-0.194085	-1.77635	0.0178571	0.0913783	1
GO_NEGATIVE_REGULATION_OF_ORGANELLE_ASSEMBLY	32	-0.264988	-1.7758	0.0208729	0.0914082	1
GO_NUCLEOBASE_METABOLIC_PROCESS	29	-0.273405	-1.77114	0.0157791	0.0934759	1
GO_REGULATION_OF_PROTEIN_LOCALIZATION_TO_CELL_PERIPHERY	97	-0.15211	-1.76961	0.0255403	0.0940208	1
GO_ARP2_3_COMPLEX_MEDIATED_ACTIN_NUCLEATION	31	-0.269193	-1.76846	0.0253165	0.0944264	1
GO_ALPHA_AMINO_ACID_CATABOLIC_PROCESS	67	-0.183034	-1.76485	0.0155642	0.0959953	1
GO_ORGANIC_ANION_TRANSPORT	302	-0.0887328	-1.76245	0.028626	0.0970279	1
GO_LYTIC_VACUOLE_ORGANIZATION	56	-0.197478	-1.7622	0.0181452	0.096898	1
GO_PROTEIN_LOCALIZATION_TO_VACUOLE	53	-0.205967	-1.76099	0.0116279	0.0972574	1
GO_REGULATION_OF_TRANSCRIPTION_INITIATION_FROM_RNA_POLYMERASE_II_PROMOTER	22	-0.315373	-1.75863	0.0258449	0.0981483	1
GO_VISUAL_BEHAVIOR	39	-0.240214	-1.75805	0.0285132	0.0982224	1
GO_MICROTUBULE_BASED_TRANSPORT	161	-0.118857	-1.75741	0.01417	0.0982563	1
GO_INORGANIC_ANION_TRANSPORT	93	-0.156697	-1.75727	0.0193424	0.0980752	1
GO_LIPOPROTEIN_BIOSYNTHETIC_PROCESS	82	-0.160432	-1.75585	0.0250522	0.0985267	1
GO_NEGATIVE_REGULATION_OF_CELL_SUBSTRATE_ADHESION	53	-0.206363	-1.75486	0.0255403	0.0988061	1
GO_RNA_CAPPING	31	-0.267604	-1.75421	0.0172414	0.09883	1
GO_MONOCARBOXYLIC_ACID_TRANSPORT	97	-0.152635	-1.75082	0.0219561	0.100281	1
GO_PHENOL_CONTAINING_COMPOUND_METABOLIC_PROCESS	55	-0.196454	-1.75025	0.0190678	0.100308	1
GO_MEMBRANE_LIPID_CATABOLIC_PROCESS	27	-0.287517	-1.74963	0.0225873	0.100383	1
GO_POSITIVE_REGULATION_OF_SYNAPSE_ASSEMBLY	61	-0.193983	-1.74769	0.0233051	0.101113	1
GO_NEUROTRANSMITTER_CATABOLIC_PROCESS	16	-0.367285	-1.74706	0.0240481	0.101189	1
GO_MITOCHONDRION_LOCALIZATION	39	-0.228015	-1.74553	0.0117417	0.101729	1
GO_MATING	23	-0.310137	-1.742	0.0282258	0.103359	1
GO_PHAGOCYTOSIS	202	-0.105869	-1.74083	0.0158103	0.10373	1
GO_RESPONSE_TO_TOXIC_SUBSTANCE	351	-0.0808988	-1.74036	0.0119284	0.103763	1
GO_PROTEIN_TARGETING_TO_VACUOLE	35	-0.244804	-1.7401	0.0176817	0.103633	1
GO_REGULATION_OF_CELLULAR_PROTEIN_CATABOLIC_PROCESS	222	-0.10257	-1.73661	0.0289575	0.105253	1
GO_REGULATION_OF_BLOOD_PRESSURE	92	-0.152932	-1.73488	0.0194932	0.105913	1
GO_NEGATIVE_REGULATION_OF_PEPTIDYL_SERINE_PHOSPHORYLATION	23	-0.302465	-1.73217	0.0216535	0.107145	1
GO_RESPONSE_TO_TRANSFORMING_GROWTH_FACTOR_BETA	186	-0.107197	-1.73212	0.0140281	0.106924	1
GO_REGULATION_OF_ERBB_SIGNALING_PATHWAY	72	-0.176542	-1.72871	0.0277778	0.108532	1
GO_IRON_ION_TRANSPORT	51	-0.207952	-1.72565	0.0204082	0.109988	1
GO_VASCULAR_SMOOTH_MUSCLE_CONTRACTION	19	-0.333734	-1.72415	0.0381526	0.110607	1
GO_REGULATION_OF_CAMP_MEDIATED_SIGNALING	26	-0.284612	-1.72388	0.0175439	0.110485	1
GO_REGULATION_OF_SODIUM_ION_TRANSMEMBRANE_TRANSPORTER_ACTIVITY	43	-0.226192	-1.72351	0.0225141	0.110465	1
GO_POSITIVE_REGULATION_OF_CALCIUM_ION_TRANSPORT	74	-0.169088	-1.72309	0.0242291	0.110438	1
GO_PHOSPHATIDYLCHOLINE_BIOSYNTHETIC_PROCESS	30	-0.266362	-1.72212	0.0233463	0.110739	1
GO_VASCULAR_PROCESS_IN_CIRCULATORY_SYSTEM	102	-0.146688	-1.72211	0.0318725	0.110485	1
GO_REGULATION_OF_NEURON_PROJECTION_DEVELOPMENT	431	-0.0738987	-1.722	0.0289575	0.110273	1
GO_PHOSPHATIDYLINOSITOL_BIOSYNTHETIC_PROCESS	108	-0.140376	-1.71657	0.0192308	0.113092	1
GO_CELL_COMMUNICATION_BY_ELECTRICAL_COUPLING_INVOLVED_IN_CARDIAC_CONDUCTION	20	-0.324362	-1.7164	0.0160966	0.112924	1
GO_RETROGRADE_TRANSPORT_ENDOSOME_TO_GOLGI	69	-0.17393	-1.7139	0.0243408	0.114104	1
GO_RESPONSE_TO_ESTRADIOL	96	-0.149064	-1.70976	0.0248447	0.116207	1
GO_RESPONSE_TO_PEPTIDE_HORMONE	316	-0.0835288	-1.70907	0.0228216	0.116242	1
GO_NEGATIVE_REGULATION_OF_NERVOUS_SYSTEM_PROCESS	16	-0.352785	-1.70777	0.0199601	0.116765	1
GO_REGULATION_OF_PROTEIN_CONTAINING_COMPLEX_DISASSEMBLY	91	-0.1524	-1.70706	0.0169133	0.116967	1
GO_REGULATION_OF_RECEPTOR_LOCALIZATION_TO_SYNAPSE	16	-0.342687	-1.70451	0.027027	0.118253	1
GO_MATING_BEHAVIOR	16	-0.352766	-1.70322	0.0203666	0.118796	1
GO_ACETYL_COA_BIOSYNTHETIC_PROCESS_FROM_PYRUVATE	15	-0.366298	-1.70128	0.0298507	0.119741	1
GO_ENSHEATHMENT_OF_NEURONS	118	-0.133186	-1.70028	0.0275591	0.120045	1
GO_REGULATION_OF_PROTEIN_TYROSINE_KINASE_ACTIVITY	72	-0.174214	-1.69903	0.0290698	0.120518	1
GO_GLUTAMATE_RECEPTOR_SIGNALING_PATHWAY	88	-0.159152	-1.69886	0.0284553	0.120348	1
GO_WALKING_BEHAVIOR	23	-0.300946	-1.69718	0.0348837	0.121156	1
GO_NEGATIVE_REGULATION_OF_CALCIUM_MEDIATED_SIGNALING	21	-0.310496	-1.697	0.031068	0.121003	1
GO_REGULATION_OF_MITOCHONDRIAL_FISSION	21	-0.304188	-1.69451	0.026616	0.122321	1
GO_NEGATIVE_REGULATION_OF_ANION_TRANSPORT	17	-0.345446	-1.69359	0.0326296	0.122595	1
GO_MEMBRANE_RAFT_ORGANIZATION	19	-0.31329	-1.6929	0.0348361	0.122751	1
GO_CERAMIDE_CATABOLIC_PROCESS	16	-0.34522	-1.69078	0.0336634	0.12376	1
GO_POSITIVE_REGULATION_OF_LIPID_KINASE_ACTIVITY	30	-0.257665	-1.69051	0.0243408	0.12368	1
GO_PHOSPHATIDYLINOSITOL_PHOSPHORYLATION	45	-0.216298	-1.69043	0.018797	0.123461	1
GO_NATURAL_KILLER_CELL_MEDIATED_IMMUNITY	29	-0.262665	-1.68947	0.0305927	0.123772	1
GO_PROTEIN_POLYUBIQUITINATION	272	-0.0881537	-1.68896	0.0325048	0.123813	1
GO_NEURON_PROJECTION_ORGANIZATION	83	-0.156657	-1.68843	0.0272374	0.123894	1
GO_REGULATION_OF_PHOSPHOLIPASE_ACTIVITY	50	-0.199526	-1.6839	0.0392157	0.126322	1
GO_FATTY_ACYL_COA_METABOLIC_PROCESS	33	-0.246474	-1.6834	0.0214425	0.126398	1
GO_REGULATION_OF_TRANSLATION_IN_RESPONSE_TO_STRESS	18	-0.33853	-1.68252	0.015748	0.126732	1
GO_REGULATION_OF_PROTEIN_TARGETING_TO_MEMBRANE	32	-0.24571	-1.68223	0.032	0.126632	1
GO_REGULATION_OF_POSTSYNAPTIC_MEMBRANE_NEUROTRANSMITTER_RECEPTOR_LEVELS	65	-0.175784	-1.68097	0.0204499	0.127161	1
GO_REGULATION_OF_SYNAPTIC_TRANSMISSION_GLUTAMATERGIC	50	-0.198577	-1.67996	0.019685	0.12758	1
GO_PHAGOSOME_MATURATION	31	-0.246446	-1.67921	0.0313808	0.127758	1
GO_RESPONSE_TO_CATECHOLAMINE	68	-0.175974	-1.67696	0.0337302	0.128843	1
GO_PEPTIDYL_SERINE_DEPHOSPHORYLATION	20	-0.30936	-1.67616	0.0390144	0.129061	1
GO_RNA_5_END_PROCESSING	18	-0.330301	-1.67597	0.0302419	0.128904	1
GO_T_CELL_RECEPTOR_SIGNALING_PATHWAY	135	-0.124714	-1.67583	0.0252918	0.128726	1
GO_PEROXISOMAL_TRANSPORT	57	-0.19179	-1.6757	0.0350877	0.128506	1
GO_FATTY_ACID_DERIVATIVE_BIOSYNTHETIC_PROCESS	60	-0.182874	-1.67522	0.0246407	0.128548	1
GO_NEGATIVE_REGULATION_OF_ERBB_SIGNALING_PATHWAY	41	-0.220305	-1.67501	0.0390947	0.128423	1
GO_MONOCARBOXYLIC_ACID_BIOSYNTHETIC_PROCESS	146	-0.120891	-1.67397	0.0390947	0.128853	1
GO_POSITIVE_REGULATION_OF_PROTEIN_AUTOPHOSPHORYLATION	21	-0.310671	-1.67316	0.0355731	0.129037	1
GO_PURINE_NUCLEOSIDE_TRIPHOSPHATE_METABOLIC_PROCESS	53	-0.19486	-1.67076	0.032	0.130438	1
GO_REGULATION_OF_CATION_CHANNEL_ACTIVITY	129	-0.122794	-1.67061	0.0323232	0.130248	1
GO_REGULATION_OF_CYTOPLASMIC_TRANSPORT	22	-0.292457	-1.67061	0.0282258	0.129974	1
GO_RENAL_FILTRATION	18	-0.340836	-1.66911	0.0300429	0.130696	1
GO_AUTOPHAGY_OF_MITOCHONDRION	66	-0.177504	-1.66796	0.0176471	0.131167	1
GO_NUCLEOBASE_CONTAINING_SMALL_MOLECULE_CATABOLIC_PROCESS	27	-0.263921	-1.66681	0.0338645	0.13161	1
GO_RESPONSE_TO_INSULIN	206	-0.100135	-1.66666	0.0385396	0.13145	1
GO_REGULATION_OF_PROTEIN_DEPHOSPHORYLATION	117	-0.130184	-1.66641	0.0225873	0.131326	1
GO_HEMATOPOIETIC_STEM_CELL_DIFFERENTIATION	73	-0.159026	-1.66634	0.0164609	0.131088	1
GO_MEMBRANE_BIOGENESIS	32	-0.254863	-1.66496	0.0276134	0.13165	1
GO_REGULATION_OF_PHOSPHOLIPID_METABOLIC_PROCESS	71	-0.169289	-1.65979	0.0296443	0.134794	1
GO_REGULATION_OF_PRESYNAPSE_ORGANIZATION	28	-0.259261	-1.65922	0.0307377	0.134895	1
GO_COENZYME_BIOSYNTHETIC_PROCESS	122	-0.128552	-1.65795	0.0301205	0.135441	1
GO_GLYCOSPHINGOLIPID_METABOLIC_PROCESS	58	-0.18207	-1.65777	0.0396825	0.135274	1
GO_PYRIMIDINE_RIBONUCLEOTIDE_METABOLIC_PROCESS	18	-0.319308	-1.65731	0.0384615	0.135274	1
GO_SECONDARY_METABOLIC_PROCESS	32	-0.244559	-1.65718	0.0316206	0.135084	1
GO_DICARBOXYLIC_ACID_METABOLIC_PROCESS	65	-0.171913	-1.65583	0.0422535	0.135677	1
GO_RIBONUCLEOSIDE_TRIPHOSPHATE_METABOLIC_PROCESS	51	-0.191124	-1.65539	0.0301205	0.135654	1
GO_RETROGRADE_AXONAL_TRANSPORT	18	-0.329187	-1.65505	0.0417495	0.135613	1
GO_CELL_ACTIVATION_INVOLVED_IN_IMMUNE_RESPONSE	488	-0.0666275	-1.65322	0.0434783	0.136629	1
GO_NEGATIVE_REGULATION_OF_PROTEASOMAL_PROTEIN_CATABOLIC_PROCESS	46	-0.204955	-1.65266	0.034	0.136728	1
GO_RELAXATION_OF_MUSCLE	21	-0.302144	-1.65092	0.036961	0.137606	1
GO_PROTEIN_LOCALIZATION_TO_LYSOSOME	31	-0.251231	-1.65055	0.0315582	0.137588	1
GO_REGULATION_OF_INTRINSIC_APOPTOTIC_SIGNALING_PATHWAY	128	-0.125805	-1.64904	0.0207039	0.138355	1
GO_NEGATIVE_REGULATION_OF_TRANSPORTER_ACTIVITY	53	-0.194674	-1.64576	0.0374753	0.140382	1
GO_INNATE_IMMUNE_RESPONSE_ACTIVATING_CELL_SURFACE_RECEPTOR_SIGNALING_PATHWAY	85	-0.153676	-1.64518	0.0261569	0.140478	1
GO_SYNAPTIC_VESICLE_RECYCLING	61	-0.17914	-1.64072	0.0397614	0.14335	1
GO_REGULATION_OF_HORMONE_LEVELS	295	-0.0807785	-1.64062	0.0355731	0.143135	1
GO_AGING	231	-0.0932992	-1.63949	0.0321932	0.143635	1
GO_POSITIVE_REGULATION_OF_ION_TRANSMEMBRANE_TRANSPORT	103	-0.135865	-1.63734	0.0428571	0.144942	1
GO_PEPTIDE_CROSS_LINKING	17	-0.328711	-1.63606	0.0585859	0.145507	1
GO_NEURON_DEATH	283	-0.0840889	-1.63383	0.0392157	0.146861	1
GO_POSITIVE_REGULATION_OF_NEURON_DIFFERENTIATION	307	-0.0804999	-1.63332	0.0456432	0.146927	1
GO_RESPONSE_TO_ELECTRICAL_STIMULUS	30	-0.249849	-1.63198	0.0340681	0.14761	1
GO_CELLULAR_RESPONSE_TO_STARVATION	114	-0.128644	-1.63132	0.0362595	0.147788	1
GO_REGULATION_OF_ACTIN_FILAMENT_BASED_PROCESS	304	-0.0822273	-1.63056	0.0365854	0.147977	1
GO_REGULATION_OF_ANION_TRANSPORT	60	-0.18016	-1.6293	0.0356436	0.148529	1
GO_POSITIVE_REGULATION_OF_EXOCYTOSIS	66	-0.1712	-1.62612	0.0526316	0.15061	1
GO_CYTOPLASMIC_TRANSLATION	84	-0.153741	-1.62441	0.0469388	0.151524	1
GO_ERBB_SIGNALING_PATHWAY	114	-0.128546	-1.62401	0.0403226	0.151582	1
GO_ACETYL_COA_BIOSYNTHETIC_PROCESS	21	-0.288806	-1.62205	0.0389105	0.152723	1
GO_ANTIGEN_RECEPTOR_MEDIATED_SIGNALING_PATHWAY	165	-0.110204	-1.622	0.0352941	0.152463	1
GO_ASPARTATE_FAMILY_AMINO_ACID_METABOLIC_PROCESS	34	-0.236261	-1.62099	0.0428571	0.152867	1
GO_POSITIVE_REGULATION_OF_PROTEIN_TARGETING_TO_MEMBRANE	28	-0.254584	-1.6189	0.0404624	0.15399	1
GO_POSITIVE_REGULATION_OF_CELL_DEVELOPMENT	430	-0.0670507	-1.61871	0.0365112	0.153835	1
GO_NEGATIVE_REGULATION_OF_CELLULAR_PROTEIN_LOCALIZATION	93	-0.141116	-1.61682	0.0451128	0.154846	1
GO_TRANSLATIONAL_INITIATION	164	-0.105501	-1.61598	0.0341365	0.15517	1
GO_POSITIVE_REGULATION_OF_AMINE_TRANSPORT	19	-0.303163	-1.61557	0.0452675	0.155154	1
GO_POSITIVE_REGULATION_OF_NERVOUS_SYSTEM_DEVELOPMENT	437	-0.0680623	-1.61171	0.044	0.157817	1
GO_CLATHRIN_COAT_ASSEMBLY	18	-0.315906	-1.61135	0.0599613	0.157794	1
GO_PROTEIN_DEPOLYMERIZATION	90	-0.147036	-1.60594	0.0639659	0.161694	1
GO_REGULATION_OF_PROTEIN_EXIT_FROM_ENDOPLASMIC_RETICULUM	23	-0.287887	-1.6059	0.036	0.161403	1
GO_POSITIVE_REGULATION_OF_LIPID_METABOLIC_PROCESS	99	-0.140039	-1.6049	0.0334646	0.161799	1
GO_REGULATION_OF_ORGANIC_ACID_TRANSPORT	35	-0.228976	-1.6019	0.0487805	0.163932	1
GO_TRANSMISSION_OF_NERVE_IMPULSE	45	-0.198043	-1.6004	0.0472279	0.164733	1
GO_RETINOL_METABOLIC_PROCESS	15	-0.333737	-1.60037	0.0486815	0.164442	1
GO_NEGATIVE_REGULATION_OF_ION_TRANSPORT	98	-0.137924	-1.59967	0.05	0.164752	1
GO_POSITIVE_REGULATION_OF_CELLULAR_PROTEIN_CATABOLIC_PROCESS	130	-0.121593	-1.5983	0.039501	0.165447	1
GO_NEGATIVE_REGULATION_OF_SUPRAMOLECULAR_FIBER_ORGANIZATION	111	-0.130646	-1.5973	0.0371094	0.165911	1
GO_ADENYLATE_CYCLASE_INHIBITING_G_PROTEIN_COUPLED_RECEPTOR_SIGNALING_PATHWAY	48	-0.197202	-1.59616	0.042471	0.166434	1
GO_RESPONSE_TO_CADMIUM_ION	44	-0.202339	-1.59291	0.0481928	0.168803	1
GO_CYTOSOLIC_TRANSPORT	135	-0.116886	-1.59169	0.0327553	0.169496	1
GO_REGULATION_OF_INTRACELLULAR_TRANSPORT	298	-0.0806853	-1.58973	0.0454545	0.170705	1
GO_MONOSACCHARIDE_BIOSYNTHETIC_PROCESS	66	-0.165283	-1.58956	0.0546559	0.17049	1
GO_CALCIUM_ION_TRANSMEMBRANE_TRANSPORT	225	-0.0930055	-1.58879	0.0441767	0.170788	1
GO_POSITIVE_REGULATION_OF_EXTRINSIC_APOPTOTIC_SIGNALING_PATHWAY	45	-0.197139	-1.58836	0.0389864	0.17085	1
GO_RESPONSE_TO_INORGANIC_SUBSTANCE	397	-0.0694632	-1.58756	0.0354167	0.171172	1
GO_MITOCHONDRIAL_MEMBRANE_ORGANIZATION	91	-0.141608	-1.58636	0.0569106	0.171839	1
GO_PROTEIN_LIPID_COMPLEX_ASSEMBLY	21	-0.28377	-1.5862	0.0443038	0.171648	1
GO_CARBOHYDRATE_METABOLIC_PROCESS	448	-0.0664657	-1.5862	0.0352697	0.171333	1
GO_POSITIVE_REGULATION_OF_CELL_SUBSTRATE_JUNCTION_ORGANIZATION	23	-0.272103	-1.58609	0.0524194	0.171121	1
GO_REGULATION_OF_ACTIN_FILAMENT_BASED_MOVEMENT	30	-0.248262	-1.58414	0.0364372	0.172419	1
GO_PLASMA_LIPOPROTEIN_PARTICLE_CLEARANCE	35	-0.224034	-1.58335	0.0455373	0.172732	1
GO_PHOSPHATIDYLINOSITOL_DEPHOSPHORYLATION	21	-0.289579	-1.58319	0.0515464	0.172532	1
GO_RESPONSE_TO_COCAINE	32	-0.233064	-1.5831	0.0435685	0.172311	1
GO_TELOMERASE_RNA_LOCALIZATION	18	-0.312059	-1.58246	0.0537849	0.1725	1
GO_POSITIVE_REGULATION_OF_RESPONSE_TO_EXTERNAL_STIMULUS	414	-0.0664492	-1.58071	0.062753	0.173746	1
GO_POSITIVE_REGULATION_OF_INTRACELLULAR_TRANSPORT	181	-0.103556	-1.57988	0.0430528	0.174136	1
GO_APOPTOTIC_MITOCHONDRIAL_CHANGES	97	-0.136379	-1.57908	0.0518672	0.174492	1
GO_LIPID_LOCALIZATION	246	-0.0881002	-1.57903	0.0489796	0.174207	1
GO_REGULATION_OF_CELLULAR_KETONE_METABOLIC_PROCESS	131	-0.120113	-1.57851	0.0567951	0.174332	1
GO_TRANSCYTOSIS	17	-0.319474	-1.57816	0.0527344	0.174262	1
GO_TRANSFORMING_GROWTH_FACTOR_BETA_RECEPTOR_SIGNALING_PATHWAY	143	-0.114337	-1.57813	0.0489237	0.173975	1
GO_PURINE_NUCLEOBASE_METABOLIC_PROCESS	18	-0.30771	-1.57753	0.0386847	0.174188	1
GO_REPRODUCTIVE_BEHAVIOR	21	-0.28559	-1.5775	0.0545455	0.17389	1
GO_PHOTORECEPTOR_CELL_DEVELOPMENT	26	-0.261481	-1.57412	0.0479846	0.176328	1
GO_REGULATION_OF_CATION_TRANSMEMBRANE_TRANSPORT	244	-0.0877109	-1.57406	0.0559846	0.176074	1
GO_ENDOSOME_TO_LYSOSOME_TRANSPORT	47	-0.192311	-1.57356	0.044316	0.176133	1
GO_REGULATION_OF_PROTEIN_LOCALIZATION_TO_PLASMA_MEMBRANE	78	-0.151228	-1.57195	0.0446247	0.177172	1
GO_POSITIVE_REGULATION_OF_TRANSMEMBRANE_TRANSPORT	136	-0.113328	-1.5713	0.0568928	0.177346	1
GO_PHOSPHOLIPID_DEPHOSPHORYLATION	33	-0.231131	-1.57063	0.0384615	0.177554	1
GO_RESPONSE_TO_EXTRACELLULAR_STIMULUS	361	-0.0734478	-1.57	0.0554415	0.177772	1
GO_REGULATION_OF_DENDRITIC_SPINE_MORPHOGENESIS	44	-0.202628	-1.56968	0.0665281	0.177748	1
GO_NEURAL_RETINA_DEVELOPMENT	46	-0.194375	-1.5688	0.0513347	0.178149	1
GO_LIPOSACCHARIDE_METABOLIC_PROCESS	97	-0.135867	-1.56823	0.0588235	0.178317	1
GO_REGULATION_OF_LIPASE_ACTIVITY	66	-0.165402	-1.56806	0.0415842	0.178145	1
GO_AMYLOID_BETA_METABOLIC_PROCESS	40	-0.211495	-1.56568	0.0493359	0.179755	1
GO_PROTEIN_LOCALIZATION_TO_POSTSYNAPTIC_MEMBRANE	41	-0.209414	-1.56505	0.060241	0.17994	1
GO_CYTOPLASMIC_TRANSLATIONAL_INITIATION	27	-0.247694	-1.56437	0.0658683	0.180182	1
GO_RENAL_WATER_HOMEOSTASIS	24	-0.269033	-1.56427	0.0486381	0.179945	1
GO_AXON_DEVELOPMENT	442	-0.0650419	-1.56177	0.047259	0.181666	1
GO_CATECHOLAMINE_METABOLIC_PROCESS	28	-0.245641	-1.5607	0.0576541	0.182278	1
GO_GTP_METABOLIC_PROCESS	20	-0.291186	-1.55939	0.0505051	0.182989	1
GO_REGULATION_OF_RESPONSE_TO_OXIDATIVE_STRESS	63	-0.167342	-1.55913	0.0507812	0.18289	1
GO_RETINA_VASCULATURE_DEVELOPMENT_IN_CAMERA_TYPE_EYE	17	-0.310084	-1.55787	0.0698152	0.183695	1
GO_MIDBODY_ABSCISSION	16	-0.322355	-1.55747	0.0458015	0.183721	1
GO_NUCLEAR_ENVELOPE_ORGANIZATION	48	-0.18869	-1.55717	0.0534653	0.183663	1
GO_HOMOTYPIC_CELL_CELL_ADHESION	61	-0.169808	-1.55669	0.0607966	0.183733	1
GO_AUTOPHAGOSOME_MATURATION	32	-0.230453	-1.55653	0.0392562	0.183519	1
GO_CELLULAR_RESPONSE_TO_PEPTIDE_HORMONE_STIMULUS	237	-0.0886525	-1.55587	0.0587045	0.183743	1
GO_DOPAMINE_TRANSPORT	29	-0.245095	-1.5554	0.0690335	0.183791	1
GO_PROTEIN_LIPID_COMPLEX_SUBUNIT_ORGANIZATION	28	-0.248129	-1.55537	0.0692464	0.183491	1
GO_ANTIGEN_PROCESSING_AND_PRESENTATION_OF_PEPTIDE_ANTIGEN_VIA_MHC_CLASS_I	83	-0.145741	-1.55487	0.05	0.18362	1
GO_REGULATION_OF_NATURAL_KILLER_CELL_MEDIATED_IMMUNITY	18	-0.310406	-1.5538	0.0482897	0.184243	1
GO_RESPONSE_TO_INTERLEUKIN_12	39	-0.210678	-1.5535	0.0460251	0.184182	1
GO_NEGATIVE_REGULATION_OF_RESPONSE_TO_OXIDATIVE_STRESS	37	-0.214279	-1.55206	0.0616016	0.185011	1
GO_RESPONSE_TO_DOPAMINE	51	-0.185591	-1.55148	0.0508475	0.185172	1
GO_OVULATION_CYCLE	46	-0.192292	-1.55052	0.0512821	0.185737	1
GO_NEGATIVE_REGULATION_OF_G_PROTEIN_COUPLED_RECEPTOR_SIGNALING_PATHWAY	33	-0.226808	-1.55028	0.0556701	0.185654	1
GO_POSITIVE_REGULATION_OF_INTRACELLULAR_PROTEIN_TRANSPORT	138	-0.110314	-1.54945	0.047817	0.186022	1
GO_ORGANIC_ACID_BIOSYNTHETIC_PROCESS	230	-0.0908776	-1.54932	0.0516529	0.185818	1
GO_POTASSIUM_ION_IMPORT_ACROSS_PLASMA_MEMBRANE	32	-0.229836	-1.5489	0.0445344	0.185867	1
GO_RESPONSE_TO_AMMONIUM_ION	120	-0.12104	-1.54796	0.0598456	0.186371	1
GO_REGULATION_OF_EPIDERMAL_GROWTH_FACTOR_ACTIVATED_RECEPTOR_ACTIVITY	20	-0.287133	-1.54558	0.0385356	0.188047	1
GO_PEPTIDYL_ASPARAGINE_MODIFICATION	31	-0.231333	-1.54554	0.074	0.187766	1
GO_ER_NUCLEUS_SIGNALING_PATHWAY	41	-0.204092	-1.54458	0.064833	0.188307	1
GO_ZINC_ION_TRANSMEMBRANE_TRANSPORT	16	-0.315519	-1.54392	0.044898	0.188556	1
GO_RIBOSOME_BIOGENESIS	254	-0.0822702	-1.54138	0.0704762	0.190433	1
GO_RAC_PROTEIN_SIGNAL_TRANSDUCTION	33	-0.225111	-1.53867	0.0683594	0.192287	1
GO_FC_RECEPTOR_MEDIATED_STIMULATORY_SIGNALING_PATHWAY	76	-0.150968	-1.53769	0.043299	0.192772	1
GO_NEUROPEPTIDE_SIGNALING_PATHWAY	23	-0.265504	-1.53733	0.0699433	0.192794	1
GO_POSITIVE_REGULATION_OF_TRANSFORMING_GROWTH_FACTOR_BETA_PRODUCTION	15	-0.332486	-1.5364	0.0730689	0.193275	1
GO_REGULATION_OF_SIGNALING_RECEPTOR_ACTIVITY	109	-0.124876	-1.53635	0.0534979	0.192987	1
GO_PROTEIN_KINASE_B_SIGNALING	168	-0.103317	-1.53535	0.0471092	0.193445	1
GO_REGULATION_OF_TUBE_SIZE	81	-0.143323	-1.53429	0.0511247	0.194056	1
GO_RESPONSE_TO_ANESTHETIC	50	-0.183028	-1.53303	0.0609037	0.19481	1
GO_REGULATION_OF_VASOCONSTRICTION	33	-0.227191	-1.53295	0.0651341	0.194549	1
GO_ACTION_POTENTIAL	94	-0.137432	-1.53237	0.0591716	0.194736	1
GO_CELLULAR_RESPONSE_TO_PEPTIDE	290	-0.0789666	-1.53069	0.046371	0.195928	1
GO_POSITIVE_REGULATION_OF_NUCLEOTIDE_METABOLIC_PROCESS	31	-0.233205	-1.53044	0.0583501	0.195793	1
GO_MITOCHONDRIAL_FISSION	35	-0.218568	-1.53039	0.0626305	0.195511	1
GO_RESPONSE_TO_CORTICOSTEROID	102	-0.131797	-1.52793	0.0591716	0.197421	1
GO_NEGATIVE_REGULATION_OF_MACROAUTOPHAGY	30	-0.233628	-1.52293	0.0575397	0.201601	1
GO_RECEPTOR_CATABOLIC_PROCESS	33	-0.222486	-1.52272	0.0594059	0.201483	1
GO_RESPONSE_TO_COPPER_ION	21	-0.276839	-1.52246	0.046748	0.201351	1
GO_MITOCHONDRIAL_RESPIRATORY_CHAIN_COMPLEX_IV_ASSEMBLY	16	-0.315963	-1.52141	0.0712871	0.202043	1
GO_REGULATION_OF_HEART_RATE	61	-0.165318	-1.51977	0.0643154	0.203207	1
GO_ESTABLISHMENT_OR_MAINTENANCE_OF_CELL_POLARITY	187	-0.0950372	-1.51952	0.0606061	0.2031	1
GO_RESPONSE_TO_LEAD_ION	22	-0.269994	-1.51929	0.0686869	0.202999	1
GO_POSITIVE_REGULATION_OF_COAGULATION	18	-0.301137	-1.51839	0.0546559	0.203472	1
GO_SULFUR_COMPOUND_CATABOLIC_PROCESS	41	-0.20467	-1.51612	0.0687623	0.205274	1
GO_POSITIVE_REGULATION_OF_MYELOID_LEUKOCYTE_CYTOKINE_PRODUCTION_INVOLVED_IN_IMMUNE_RESPONSE	16	-0.308346	-1.51582	0.0582329	0.205254	1
GO_ESTABLISHMENT_OF_PROTEIN_LOCALIZATION_TO_VACUOLE	42	-0.202549	-1.51365	0.0604839	0.206926	1
GO_GLUCOSAMINE_CONTAINING_COMPOUND_METABOLIC_PROCESS	17	-0.30393	-1.5131	0.0582121	0.207086	1
GO_REGULATION_OF_TRANSCRIPTION_FROM_RNA_POLYMERASE_II_PROMOTER_IN_RESPONSE_TO_HYPOXIA	68	-0.156409	-1.51305	0.0633397	0.206807	1
GO_NUCLEOBASE_CONTAINING_SMALL_MOLECULE_BIOSYNTHETIC_PROCESS	84	-0.141517	-1.51273	0.0597302	0.206757	1
GO_PHOSPHOLIPID_CATABOLIC_PROCESS	32	-0.220986	-1.51127	0.0693878	0.207724	1
GO_PHOSPHATIDYLSERINE_METABOLIC_PROCESS	21	-0.282673	-1.51124	0.0686869	0.20743	1
GO_RAS_PROTEIN_SIGNAL_TRANSDUCTION	373	-0.0690866	-1.50869	0.074364	0.209515	1
GO_POSITIVE_REGULATION_OF_PROTEIN_KINASE_B_SIGNALING	103	-0.12744	-1.50669	0.0747475	0.211013	1
GO_PROTEIN_O_LINKED_MANNOSYLATION	16	-0.316435	-1.50668	0.0709939	0.210688	1
GO_NEGATIVE_REGULATION_OF_OXIDATIVE_STRESS_INDUCED_NEURON_DEATH	16	-0.318145	-1.50642	0.0755467	0.210585	1
GO_REGULATION_OF_CARDIAC_MUSCLE_CONTRACTION	54	-0.17468	-1.50578	0.0502008	0.210803	1
GO_GLUTAMATE_SECRETION	33	-0.217309	-1.5048	0.0554455	0.211328	1
GO_ANION_HOMEOSTASIS	32	-0.225569	-1.50438	0.0838323	0.211402	1
GO_POSITIVE_REGULATION_OF_ATP_METABOLIC_PROCESS	35	-0.217565	-1.5038	0.0766045	0.211664	1
GO_PROTEASOMAL_UBIQUITIN_INDEPENDENT_PROTEIN_CATABOLIC_PROCESS	20	-0.281284	-1.50322	0.0779727	0.211846	1
GO_REGULATION_OF_ENDOPLASMIC_RETICULUM_UNFOLDED_PROTEIN_RESPONSE	24	-0.249741	-1.50302	0.0682731	0.211712	1
GO_LOW_DENSITY_LIPOPROTEIN_RECEPTOR_PARTICLE_METABOLIC_PROCESS	19	-0.289848	-1.50007	0.0709812	0.21427	1
GO_POSITIVE_REGULATION_OF_RESPONSE_TO_DRUG	18	-0.293394	-1.50005	0.0811881	0.213958	1
GO_SECRETORY_GRANULE_ORGANIZATION	24	-0.249227	-1.49977	0.0649606	0.213899	1
GO_NEGATIVE_REGULATION_OF_PROTEIN_CONTAINING_COMPLEX_DISASSEMBLY	57	-0.168582	-1.49764	0.0722433	0.215626	1
GO_NEGATIVE_REGULATION_OF_JNK_CASCADE	28	-0.234154	-1.49737	0.0675676	0.215532	1
GO_REGULATION_OF_DOPAMINE_SECRETION	24	-0.257958	-1.49708	0.0668016	0.215478	1
GO_POSITIVE_REGULATION_OF_WOUND_HEALING	35	-0.208595	-1.49592	0.0729783	0.216323	1
GO_SIGNAL_TRANSDUCTION_INVOLVED_IN_CELLULAR_RESPONSE_TO_AMMONIUM_ION	53	-0.172802	-1.49528	0.0698152	0.216598	1
GO_POSITIVE_REGULATION_OF_HORMONE_SECRETION	76	-0.146311	-1.49382	0.059761	0.217644	1
GO_NEGATIVE_REGULATION_OF_INTRACELLULAR_SIGNAL_TRANSDUCTION	395	-0.0650839	-1.49361	0.0717213	0.217459	1
GO_RESPONSE_TO_ACTIVITY	50	-0.179429	-1.49334	0.0657371	0.217359	1
GO_CELLULAR_RESPONSE_TO_LOW_DENSITY_LIPOPROTEIN_PARTICLE_STIMULUS	15	-0.324751	-1.49302	0.0736842	0.217327	1
GO_PLATELET_AGGREGATION	48	-0.182571	-1.49296	0.0665323	0.217047	1
GO_REGULATION_OF_OXIDATIVE_STRESS_INDUCED_CELL_DEATH	49	-0.1812	-1.49188	0.0852713	0.217807	1
GO_POSITIVE_REGULATION_OF_RESPONSE_TO_WOUNDING	44	-0.192498	-1.49161	0.0661479	0.217747	1
GO_PROTEIN_PROCESSING	137	-0.10885	-1.49056	0.0567515	0.21841	1
GO_ORGANELLE_DISASSEMBLY	86	-0.137859	-1.4852	0.0639535	0.223257	1
GO_POSITIVE_REGULATION_OF_STEROID_METABOLIC_PROCESS	15	-0.316059	-1.48514	0.0750507	0.222979	1
GO_MEMBRANE_PROTEIN_ECTODOMAIN_PROTEOLYSIS	34	-0.218061	-1.48274	0.0745098	0.224924	1
GO_POSITIVE_REGULATION_OF_PROTEIN_LOCALIZATION_TO_CELL_PERIPHERY	52	-0.176674	-1.48245	0.0728347	0.224862	1
GO_MANNOSYLATION	30	-0.22907	-1.48045	0.079918	0.226483	1
GO_MYELOID_LEUKOCYTE_CYTOKINE_PRODUCTION	26	-0.241138	-1.47824	0.0802348	0.22835	1
GO_OVULATION_CYCLE_PROCESS	29	-0.228107	-1.47728	0.0707269	0.229038	1
GO_PYRIMIDINE_CONTAINING_COMPOUND_BIOSYNTHETIC_PROCESS	43	-0.193549	-1.47711	0.0734694	0.228887	1
GO_REGULATION_OF_OLIGODENDROCYTE_DIFFERENTIATION	29	-0.235475	-1.47623	0.0705394	0.229352	1
GO_POSITIVE_REGULATION_OF_PROTEIN_TYROSINE_KINASE_ACTIVITY	43	-0.18752	-1.47617	0.0671937	0.229061	1
GO_REGULATION_OF_PROTEIN_OLIGOMERIZATION	19	-0.280067	-1.47545	0.0703934	0.229453	1
GO_SMOOTH_MUSCLE_CELL_MIGRATION	62	-0.158995	-1.47286	0.0903733	0.231646	1
GO_OVULATION	15	-0.318576	-1.47215	0.0791506	0.232035	1
GO_NEUROTRANSMITTER_METABOLIC_PROCESS	98	-0.126441	-1.47098	0.0732177	0.232863	1
GO_REGULATION_OF_MITOTIC_SPINDLE_ASSEMBLY	20	-0.272377	-1.4693	0.0717054	0.234134	1
GO_EPIDERMAL_GROWTH_FACTOR_RECEPTOR_SIGNALING_PATHWAY	93	-0.132618	-1.46849	0.0891089	0.234595	1
GO_REGULATION_OF_CELL_MORPHOGENESIS	429	-0.0622929	-1.468	0.0769231	0.234724	1
GO_POSITIVE_REGULATION_OF_CELL_JUNCTION_ASSEMBLY	29	-0.231658	-1.46766	0.0711539	0.234706	1
GO_ZINC_ION_HOMEOSTASIS	16	-0.301089	-1.46761	0.0757895	0.234412	1
GO_SECONDARY_METABOLITE_BIOSYNTHETIC_PROCESS	16	-0.306841	-1.467	0.0958333	0.234691	1
GO_IMMUNE_RESPONSE_REGULATING_SIGNALING_PATHWAY	388	-0.0637333	-1.46401	0.0660194	0.237394	1
GO_NAD_METABOLIC_PROCESS	38	-0.200623	-1.46396	0.0892495	0.237097	1
GO_COFACTOR_TRANSPORT	31	-0.222646	-1.46052	0.0755102	0.240219	1
GO_PYRIMIDINE_NUCLEOTIDE_BIOSYNTHETIC_PROCESS	37	-0.201917	-1.45929	0.0921844	0.241163	1
GO_PROTEIN_N_LINKED_GLYCOSYLATION	73	-0.144447	-1.45846	0.0933063	0.241676	1
GO_OLIGOSACCHARIDE_METABOLIC_PROCESS	37	-0.198898	-1.45786	0.0804829	0.241957	1
GO_CYTOKINESIS	130	-0.111252	-1.45759	0.0903614	0.241905	1
GO_SYNAPTIC_VESICLE_ENDOCYTOSIS	50	-0.17603	-1.45758	0.0782779	0.24156	1
GO_MUSCLE_CELL_MIGRATION	74	-0.144234	-1.45751	0.0732673	0.241279	1
GO_POSITIVE_REGULATION_OF_LEUKOCYTE_MEDIATED_CYTOTOXICITY	23	-0.250699	-1.45702	0.0941176	0.241486	1
GO_REGULATION_OF_CARDIAC_MUSCLE_CONTRACTION_BY_CALCIUM_ION_SIGNALING	20	-0.274288	-1.45681	0.0836735	0.241363	1
GO_CELL_VOLUME_HOMEOSTASIS	21	-0.271379	-1.45673	0.0893855	0.241097	1
GO_PROTEIN_DEPHOSPHORYLATION	275	-0.0756636	-1.45627	0.0838323	0.241222	1
GO_NEGATIVE_REGULATION_OF_MUSCLE_CONTRACTION	17	-0.288888	-1.45588	0.09375	0.241279	1
GO_POSITIVE_REGULATION_OF_CANONICAL_WNT_SIGNALING_PATHWAY	127	-0.112896	-1.45564	0.0788382	0.24118	1
GO_PERK_MEDIATED_UNFOLDED_PROTEIN_RESPONSE	18	-0.282518	-1.455	0.0833333	0.241524	1
GO_PROTEIN_EXIT_FROM_ENDOPLASMIC_RETICULUM	37	-0.203949	-1.45383	0.0816327	0.242401	1
GO_NEGATIVE_REGULATION_OF_SIGNALING_RECEPTOR_ACTIVITY	25	-0.242403	-1.45318	0.0995935	0.242699	1
GO_RETROGRADE_VESICLE_MEDIATED_TRANSPORT_GOLGI_TO_ENDOPLASMIC_RETICULUM	80	-0.141762	-1.45175	0.072407	0.24378	1
GO_SKELETAL_MUSCLE_TISSUE_REGENERATION	26	-0.237164	-1.45165	0.0835073	0.243504	1
GO_POSITIVE_REGULATION_OF_TRANSPORTER_ACTIVITY	79	-0.139175	-1.45163	0.0894632	0.243181	1
GO_REGULATION_OF_CAMP_DEPENDENT_PROTEIN_KINASE_ACTIVITY	15	-0.308503	-1.45131	0.0786749	0.243168	1
GO_LEUKOCYTE_MIGRATION	262	-0.0779517	-1.45023	0.0866935	0.243917	1
GO_ACTIVATION_OF_PROTEIN_KINASE_B_ACTIVITY	24	-0.24913	-1.44858	0.0934959	0.245312	1
GO_VACUOLAR_ACIDIFICATION	19	-0.278004	-1.44826	0.0868726	0.245324	1
GO_REGULATION_OF_VASCULAR_PERMEABILITY	26	-0.240226	-1.44696	0.108871	0.246337	1
GO_NEGATIVE_REGULATION_OF_BLOOD_PRESSURE	24	-0.242054	-1.44649	0.0922131	0.246501	1
GO_NUCLEOTIDE_EXCISION_REPAIR_DNA_DUPLEX_UNWINDING	21	-0.267489	-1.44444	0.105566	0.248234	1
GO_RESPONSE_TO_CARBOHYDRATE	165	-0.0951226	-1.44438	0.083004	0.247958	1
GO_NUCLEOSIDE_CATABOLIC_PROCESS	15	-0.307641	-1.44437	0.118126	0.247623	1
GO_REGULATION_OF_REGULATED_SECRETORY_PATHWAY	125	-0.113476	-1.4433	0.0797665	0.248378	1
GO_REGULATION_OF_ORGANELLE_ASSEMBLY	164	-0.0961388	-1.44299	0.0901961	0.24833	1
GO_CARDIAC_MUSCLE_CELL_CONTRACTION	53	-0.173082	-1.44253	0.0826923	0.248459	1
GO_LAMELLIPODIUM_ORGANIZATION	72	-0.146616	-1.4425	0.0800821	0.248139	1
GO_RESPONSE_TO_LEPTIN	18	-0.280653	-1.44109	0.0968421	0.249407	1
GO_POSITIVE_REGULATION_OF_ESTABLISHMENT_OF_PROTEIN_LOCALIZATION	339	-0.0678166	-1.44067	0.0925197	0.249534	1
GO_DE_NOVO_PROTEIN_FOLDING	34	-0.205876	-1.44054	0.0862745	0.249331	1
GO_SLEEP	18	-0.282401	-1.44031	0.100629	0.249204	1
GO_RESPONSE_TO_PEPTIDE	384	-0.0653679	-1.43978	0.105906	0.249353	1
GO_VASODILATION	21	-0.263301	-1.43933	0.0943775	0.249468	1
GO_REGULATION_OF_PROTEIN_MATURATION	43	-0.187953	-1.43877	0.0978044	0.249712	1
GO_LONG_CHAIN_FATTY_ACYL_COA_METABOLIC_PROCESS	22	-0.256655	-1.43865	0.0994036	0.249494	1
GO_REGULATION_OF_PROTEIN_STABILITY	240	-0.0809647	-1.43859	0.0968992	0.249204	1
