# Supplementary material for: A tumor suppressor role for EZH2 in diffuse midline glioma pathogenesis
Source: Acta Neuropathol Commun. 2022 Apr 8;10:47. doi: 10.1186/s40478-022-01336-5 (PMC8994223; doi:10.1186/s40478-022-01336-5)
Supplement: Supplementary file 7 — Additional file 7. GSEA analysis of EZH2 GOF vs. EZH2 WT in the context of PDGFB and p53 shRNA. [file 40478_2022_1336_MOESM7_ESM.xlsx]

## Sheet: Hallmark
Positively enriched in RCAS-CRE
NAME	SIZE	ES	NES	NOM p-val	FDR q-val	FWER p-val
HALLMARK_OXIDATIVE_PHOSPHORYLATION	178	0.525173	8.06985	0	0	0
HALLMARK_MYC_TARGETS_V1	192	0.444168	7.12715	0	0	0
HALLMARK_PROTEIN_SECRETION	94	0.499036	5.61897	0	0	0
HALLMARK_MTORC1_SIGNALING	187	0.343977	5.48851	0	0	0
HALLMARK_MITOTIC_SPINDLE	197	0.311693	5.11109	0	0	0
HALLMARK_UNFOLDED_PROTEIN_RESPONSE	107	0.417911	5.01826	0	0	0
HALLMARK_ADIPOGENESIS	194	0.297458	4.99363	0	0	0
HALLMARK_DNA_REPAIR	140	0.334961	4.62459	0	0	0
HALLMARK_FATTY_ACID_METABOLISM	147	0.298103	4.13138	0	0	0
HALLMARK_UV_RESPONSE_UP	147	0.272958	3.90941	0	0	0
HALLMARK_PI3K_AKT_MTOR_SIGNALING	103	0.307667	3.72895	0	0	0
HALLMARK_HEME_METABOLISM	180	0.241094	3.7046	0	0	0
HALLMARK_P53_PATHWAY	192	0.23108	3.66887	0	0	0
HALLMARK_ANDROGEN_RESPONSE	93	0.313803	3.50449	0	0	0
HALLMARK_E2F_TARGETS	190	0.218633	3.4989	0	0	0
HALLMARK_G2M_CHECKPOINT	188	0.216144	3.47655	0	0	0
HALLMARK_MYC_TARGETS_V2	58	0.385424	3.44495	0	0	0
HALLMARK_GLYCOLYSIS	192	0.210034	3.43281	0	0	0
HALLMARK_PEROXISOME	98	0.296461	3.38479	0	0	0
HALLMARK_UV_RESPONSE_DN	139	0.234268	3.24191	0	0	0
HALLMARK_INTERFERON_ALPHA_RESPONSE	89	0.2894	3.23234	0	0	0
HALLMARK_APICAL_JUNCTION	194	0.199622	3.22802	0	0	0
HALLMARK_APOPTOSIS	157	0.219336	3.17666	0	0	0
HALLMARK_INTERFERON_GAMMA_RESPONSE	183	0.196981	3.06545	0	0	0
HALLMARK_HYPOXIA	189	0.189603	2.96572	0	0	0
HALLMARK_REACTIVE_OXYGEN_SPECIES_PATHWAY	45	0.327028	2.56312	0	0.000239829	0.003
HALLMARK_TNFA_SIGNALING_VIA_NFKB	196	0.157795	2.54212	0	0.000230947	0.003
HALLMARK_CHOLESTEROL_HOMEOSTASIS	68	0.241434	2.33722	0.0019802	0.00116654	0.017
HALLMARK_COMPLEMENT	184	0.140397	2.21971	0	0.0023137	0.036
HALLMARK_HEDGEHOG_SIGNALING	36	0.309418	2.18628	0	0.00241211	0.039
HALLMARK_ESTROGEN_RESPONSE_EARLY	193	0.130832	2.06857	0	0.00466416	0.076
HALLMARK_KRAS_SIGNALING_UP	189	0.130583	2.06523	0.00198807	0.0045184	0.076
HALLMARK_TGF_BETA_SIGNALING	54	0.229694	1.99091	0	0.006521	0.113
HALLMARK_XENOBIOTIC_METABOLISM	185	0.119876	1.95144	0	0.00803469	0.14
HALLMARK_INFLAMMATORY_RESPONSE	195	0.11454	1.84807	0.0115385	0.014722	0.252
HALLMARK_EPITHELIAL_MESENCHYMAL_TRANSITION	192	0.114003	1.84292	0.0139721	0.014702	0.258
HALLMARK_IL2_STAT5_SIGNALING	191	0.0931688	1.45937	0.0843373	0.101269	0.879
HALLMARK_NOTCH_SIGNALING	31	0.218044	1.45313	0.0866935	0.101794	0.886
HALLMARK_ESTROGEN_RESPONSE_LATE	191	0.0893747	1.43826	0.0805785	0.105576	0.906
HALLMARK_BILE_ACID_METABOLISM	110	0.111548	1.37019	0.11134	0.138351	0.958
HALLMARK_ANGIOGENESIS	35	0.190162	1.31177	0.155508	0.170921	0.983
HALLMARK_IL6_JAK_STAT3_SIGNALING	85	0.120815	1.30399	0.146939	0.171619	0.989
Negatively enriched in RCAS-CRE
NAME	SIZE	ES	NES	NOM p-val	FDR q-val	FWER p-val
HALLMARK_KRAS_SIGNALING_DN	189	-0.144072	-2.28038	0	0.00388966	0.023

## Sheet: cp c2
Positively enriched in RCAS-CRE
NAME	SIZE	ES	NES	NOM p-val	FDR q-val	FWER p-val
REACTOME_TRANSLATION	266	0.406198	7.82451	0	0	0
REACTOME_CLASS_I_MHC_MEDIATED_ANTIGEN_PROCESSING_PRESENTATION	344	0.337513	7.22497	0	0	0
REACTOME_ASPARAGINE_N_LINKED_GLYCOSYLATION	287	0.35986	7.03004	0	0	0
REACTOME_PROCESSING_OF_CAPPED_INTRON_CONTAINING_PRE_MRNA	234	0.391051	6.95963	0	0	0
REACTOME_ANTIGEN_PROCESSING_UBIQUITINATION_PROTEASOME_DEGRADATION	293	0.347727	6.80713	0	0	0
REACTOME_CELL_CYCLE_MITOTIC	476	0.269719	6.75929	0	0	0
REACTOME_M_PHASE	337	0.307206	6.44871	0	0	0
REACTOME_SIGNALING_BY_ROBO_RECEPTORS	208	0.374366	6.42779	0	0	0
REACTOME_DISEASES_OF_SIGNAL_TRANSDUCTION_BY_GROWTH_FACTOR_RECEPTORS_AND_SECOND_MESSENGERS	366	0.283083	6.42449	0	0	0
REACTOME_MRNA_SPLICING	186	0.407419	6.38827	0	0	0
KEGG_SPLICEOSOME	122	0.472724	6.1116	0	0	0
REACTOME_HIV_INFECTION	213	0.35489	6.10966	0	0	0
REACTOME_AUTOPHAGY	140	0.435329	6.03603	0	0	0
REACTOME_RRNA_PROCESSING	188	0.382715	5.99629	0	0	0
REACTOME_NEURONAL_SYSTEM	395	0.258512	5.96854	0	0	0
REACTOME_TRANSPORT_TO_THE_GOLGI_AND_SUBSEQUENT_MODIFICATION	171	0.390222	5.96733	0	0	0
REACTOME_SIGNALING_BY_RHO_GTPASES	378	0.262675	5.89961	0	0	0
REACTOME_INTRA_GOLGI_AND_RETROGRADE_GOLGI_TO_ER_TRAFFIC	186	0.382963	5.86571	0	0	0
REACTOME_DEUBIQUITINATION	230	0.336797	5.85565	0	0	0
REACTOME_ER_TO_GOLGI_ANTEROGRADE_TRANSPORT	142	0.414292	5.70187	0	0	0
REACTOME_MITOCHONDRIAL_TRANSLATION	94	0.484173	5.59509	0	0	0
REACTOME_MITOTIC_METAPHASE_AND_ANAPHASE	222	0.315048	5.58274	0	0	0
REACTOME_NEDDYLATION	226	0.31154	5.51026	0	0	0
REACTOME_UB_SPECIFIC_PROCESSING_PROTEASES	158	0.367367	5.45864	0	0	0
REACTOME_TRANSCRIPTIONAL_REGULATION_BY_TP53	330	0.259894	5.41895	0	0	0
REACTOME_THE_CITRIC_ACID_TCA_CYCLE_AND_RESPIRATORY_ELECTRON_TRANSPORT	144	0.385262	5.41167	0	0	0
REACTOME_INTRACELLULAR_SIGNALING_BY_SECOND_MESSENGERS	297	0.269275	5.38936	0	0	0
REACTOME_RHO_GTPASE_EFFECTORS	251	0.288342	5.37597	0	0	0
REACTOME_CHROMATIN_MODIFYING_ENZYMES	199	0.323426	5.32114	0	0	0
KEGG_UBIQUITIN_MEDIATED_PROTEOLYSIS	125	0.402873	5.31522	0	0	0
REACTOME_REGULATION_OF_EXPRESSION_OF_SLITS_AND_ROBOS	164	0.344175	5.13745	0	0	0
REACTOME_PTEN_REGULATION	137	0.371653	5.12757	0	0	0
REACTOME_GOLGI_TO_ER_RETROGRADE_TRANSPORT	124	0.387293	5.12049	0	0	0
REACTOME_RESPIRATORY_ELECTRON_TRANSPORT	89	0.464697	5.10544	0	0	0
REACTOME_SIGNALING_BY_RECEPTOR_TYROSINE_KINASES	495	0.197526	5.1023	0	0	0
REACTOME_SIGNALING_BY_WNT	267	0.266001	5.09184	0	0	0
KEGG_HUNTINGTONS_DISEASE	150	0.36102	5.06662	0	0	0
REACTOME_NEUTROPHIL_DEGRANULATION	418	0.216491	5.03676	0	0	0
REACTOME_FLT3_SIGNALING	256	0.269241	4.9892	0	0	0
REACTOME_FC_EPSILON_RECEPTOR_FCERI_SIGNALING	128	0.36884	4.94262	0	0	0
REACTOME_ORGANELLE_BIOGENESIS_AND_MAINTENANCE	263	0.266137	4.92593	0	0	0
REACTOME_TRANSMISSION_ACROSS_CHEMICAL_SYNAPSES	257	0.260276	4.91744	0	0	0
KEGG_ENDOCYTOSIS	171	0.327031	4.91521	0	0	0
REACTOME_HEDGEHOG_OFF_STATE	108	0.400801	4.91089	0	0	0
REACTOME_HOST_INTERACTIONS_OF_HIV_FACTORS	120	0.384068	4.8851	0	0	0
KEGG_OXIDATIVE_PHOSPHORYLATION	98	0.424602	4.86948	0	0	0
REACTOME_SIGNALING_BY_HEDGEHOG	144	0.345537	4.84505	0	0	0
REACTOME_DEGRADATION_OF_BETA_CATENIN_BY_THE_DESTRUCTION_COMPLEX	82	0.45774	4.83584	0	0	0
REACTOME_SIGNALING_BY_NTRKS	133	0.363651	4.83452	0	0	0
REACTOME_MAPK_FAMILY_SIGNALING_CASCADES	284	0.246624	4.83352	0	0	0
REACTOME_RESPIRATORY_ELECTRON_TRANSPORT_ATP_SYNTHESIS_BY_CHEMIOSMOTIC_COUPLING_AND_HEAT_PRODUCTION_BY_UNCOUPLING_PROTEINS	95	0.431208	4.82537	0	0	0
REACTOME_COPI_MEDIATED_ANTEROGRADE_TRANSPORT	91	0.437952	4.8163	0	0	0
KEGG_PARKINSONS_DISEASE	96	0.421554	4.80174	0	0	0
REACTOME_REGULATION_OF_RAS_BY_GAPS	67	0.508819	4.80081	0	0	0
KEGG_ALZHEIMERS_DISEASE	141	0.346643	4.78811	0	0	0
PID_PDGFRB_PATHWAY	129	0.364667	4.77324	0	0	0
KEGG_LYSOSOME	117	0.371739	4.76272	0	0	0
REACTOME_EPH_EPHRIN_SIGNALING	91	0.422281	4.72395	0	0	0
REACTOME_DEGRADATION_OF_AXIN	54	0.540018	4.72382	0	0	0
REACTOME_PROGRAMMED_CELL_DEATH	164	0.314542	4.72006	0	0	0
REACTOME_SIGNALING_BY_NOTCH	178	0.293621	4.6766	0	0	0
REACTOME_NEUROTRANSMITTER_RECEPTORS_AND_POSTSYNAPTIC_SIGNAL_TRANSMISSION	195	0.283337	4.64454	0	0	0
REACTOME_SEPARATION_OF_SISTER_CHROMATIDS	179	0.306771	4.63669	0	0	0
KEGG_NEUROTROPHIN_SIGNALING_PATHWAY	118	0.365648	4.63513	0	0	0
REACTOME_CELL_CYCLE_CHECKPOINTS	244	0.252234	4.60945	0	0	0
REACTOME_REGULATION_OF_PTEN_STABILITY_AND_ACTIVITY	68	0.490236	4.57725	0	0	0
REACTOME_TRANS_GOLGI_NETWORK_VESICLE_BUDDING	69	0.47535	4.56486	0	0	0
REACTOME_DEGRADATION_OF_GLI1_BY_THE_PROTEASOME	57	0.51664	4.55643	0	0	0
REACTOME_FCERI_MEDIATED_NF_KB_ACTIVATION	78	0.439259	4.55404	0	0	0
REACTOME_MITOTIC_G2_G2_M_PHASES	186	0.290525	4.55129	0	0	0
REACTOME_HIV_LIFE_CYCLE	137	0.326385	4.50862	0	0	0
REACTOME_CLATHRIN_MEDIATED_ENDOCYTOSIS	141	0.324459	4.49815	0	0	0
REACTOME_NEGATIVE_REGULATION_OF_NOTCH4_SIGNALING	52	0.531402	4.49812	0	0	0
REACTOME_ACTIVATION_OF_NMDA_RECEPTORS_AND_POSTSYNAPTIC_EVENTS	87	0.4064	4.48919	0	0	0
REACTOME_RAF_ACTIVATION	30	0.688059	4.48746	0	0	0
REACTOME_TCF_DEPENDENT_SIGNALING_IN_RESPONSE_TO_WNT	172	0.29033	4.44335	0	0	0
REACTOME_TP53_REGULATES_METABOLIC_GENES	78	0.417997	4.42375	0	0	0
REACTOME_CILIUM_ASSEMBLY	192	0.278319	4.41698	0	0	0
REACTOME_TCR_SIGNALING	104	0.363421	4.40614	0	0	0
REACTOME_AUF1_HNRNP_D0_BINDS_AND_DESTABILIZES_MRNA	54	0.521455	4.40367	0	0	0
REACTOME_REGULATION_OF_MRNA_STABILITY_BY_PROTEINS_THAT_BIND_AU_RICH_ELEMENTS	85	0.399116	4.4036	0	0	0
REACTOME_PROTEIN_LOCALIZATION	152	0.305521	4.39617	0	0	0
PID_ERBB1_DOWNSTREAM_PATHWAY	105	0.366428	4.38027	0	0	0
REACTOME_INTERLEUKIN_1_SIGNALING	98	0.381251	4.37422	0	0	0
REACTOME_S_PHASE	159	0.297828	4.36928	0	0	0
REACTOME_COPI_INDEPENDENT_GOLGI_TO_ER_RETROGRADE_TRAFFIC	47	0.541888	4.3474	0	0	0
REACTOME_EPHB_MEDIATED_FORWARD_SIGNALING	42	0.558238	4.32807	0	0	0
REACTOME_DOWNSTREAM_SIGNALING_EVENTS_OF_B_CELL_RECEPTOR_BCR	79	0.41664	4.31993	0	0	0
REACTOME_SELECTIVE_AUTOPHAGY	74	0.424277	4.30886	0	0	0
REACTOME_INFLUENZA_INFECTION	146	0.304184	4.29673	0	0	0
REACTOME_EUKARYOTIC_TRANSLATION_INITIATION	113	0.347292	4.29655	0	0	0
REACTOME_GOLGI_ASSOCIATED_VESICLE_BIOGENESIS	55	0.477955	4.2931	0	0	0
KEGG_PROTEASOME	43	0.552695	4.29189	0	0	0
REACTOME_HEDGEHOG_LIGAND_BIOGENESIS	64	0.449724	4.29008	0	0	0
REACTOME_THE_ROLE_OF_GTSE1_IN_G2_M_PROGRESSION_AFTER_G2_CHECKPOINT	71	0.438386	4.28661	0	0	0
PID_MET_PATHWAY	79	0.414363	4.28533	0	0	0
REACTOME_PCP_CE_PATHWAY	91	0.379144	4.28363	0	0	0
REACTOME_BETA_CATENIN_INDEPENDENT_WNT_SIGNALING	145	0.300824	4.2603	0	0	0
REACTOME_MITOTIC_PROMETAPHASE	190	0.26293	4.25372	0	0	0
REACTOME_DEGRADATION_OF_DVL	56	0.476414	4.24947	0	0	0
REACTOME_PROTEIN_PROTEIN_INTERACTIONS_AT_SYNAPSES	85	0.392875	4.24488	0	0	0
REACTOME_REGULATION_OF_RUNX3_EXPRESSION_AND_ACTIVITY	54	0.484327	4.23735	0	0	0
REACTOME_HSP90_CHAPERONE_CYCLE_FOR_STEROID_HORMONE_RECEPTORS_SHR	51	0.504917	4.22919	0	0	0
REACTOME_APC_C_CDH1_MEDIATED_DEGRADATION_OF_CDC20_AND_OTHER_APC_C_CDH1_TARGETED_PROTEINS_IN_LATE_MITOSIS_EARLY_G1	71	0.43032	4.2208	0	0	0
REACTOME_UCH_PROTEINASES	84	0.393368	4.20714	0	0	0
REACTOME_MHC_CLASS_II_ANTIGEN_PRESENTATION	101	0.365897	4.20178	0	0	0
REACTOME_METABOLISM_OF_POLYAMINES	58	0.469049	4.18876	0	0	0
REACTOME_TOLL_LIKE_RECEPTOR_9_TLR9_CASCADE	92	0.369943	4.18376	0	0	0
REACTOME_CLEC7A_DECTIN_1_SIGNALING	97	0.3644	4.17858	0	0	0
REACTOME_HATS_ACETYLATE_HISTONES	75	0.412347	4.17374	0	0	0
REACTOME_PROTEIN_FOLDING	96	0.356266	4.13976	0	0	0
REACTOME_SIGNALING_BY_NOTCH4	80	0.391561	4.13155	0	0	0
REACTOME_RRNA_MODIFICATION_IN_THE_NUCLEUS_AND_CYTOSOL	54	0.480741	4.12716	0	0	0
REACTOME_DEFECTIVE_CFTR_CAUSES_CYSTIC_FIBROSIS	60	0.462176	4.12551	0	0	0
REACTOME_MITOCHONDRIAL_PROTEIN_IMPORT	59	0.44794	4.10965	0	0	0
REACTOME_CROSS_PRESENTATION_OF_SOLUBLE_EXOGENOUS_ANTIGENS_ENDOSOMES	47	0.50668	4.09598	0	0	0
REACTOME_DECTIN_1_MEDIATED_NONCANONICAL_NF_KB_SIGNALING	60	0.445464	4.09212	0	0	0
PID_TRKR_PATHWAY	59	0.463846	4.08726	0	0	0
REACTOME_SEMAPHORIN_INTERACTIONS	64	0.436507	4.07973	0	0	0
REACTOME_ABC_FAMILY_PROTEINS_MEDIATED_TRANSPORT	97	0.357288	4.07801	0	0	0
REACTOME_NUCLEOTIDE_EXCISION_REPAIR	109	0.334536	4.0628	0	0	0
REACTOME_FCGAMMA_RECEPTOR_FCGR_DEPENDENT_PHAGOCYTOSIS	83	0.389037	4.05585	0	0	0
REACTOME_NONSENSE_MEDIATED_DECAY_NMD	111	0.325902	4.04652	0	0	0
REACTOME_SIGNALING_BY_THE_B_CELL_RECEPTOR_BCR	108	0.333022	4.03428	0	0	0
REACTOME_MAPK6_MAPK4_SIGNALING	90	0.35124	4.03135	0	0	0
REACTOME_MITOTIC_PROPHASE	79	0.385713	4.02295	0	0	0
REACTOME_RUNX1_REGULATES_TRANSCRIPTION_OF_GENES_INVOLVED_IN_DIFFERENTIATION_OF_HSCS	68	0.409239	4.01935	0	0	0
REACTOME_COMPLEX_I_BIOGENESIS	48	0.484907	4.01007	0	0	0
REACTOME_STABILIZATION_OF_P53	54	0.46287	4.00426	0	0	0
PID_VEGFR1_2_PATHWAY	69	0.40695	3.99923	0	0	0
REACTOME_APC_C_MEDIATED_DEGRADATION_OF_CELL_CYCLE_PROTEINS	84	0.374189	3.99394	0	0	0
REACTOME_INTERLEUKIN_1_FAMILY_SIGNALING	129	0.30861	3.98644	0	0	0
REACTOME_TRANSPORT_OF_MATURE_TRANSCRIPT_TO_CYTOPLASM	78	0.390247	3.97124	0	0	0
REACTOME_SRP_DEPENDENT_COTRANSLATIONAL_PROTEIN_TARGETING_TO_MEMBRANE	106	0.325513	3.96788	0	0	0
REACTOME_PHOSPHOLIPID_METABOLISM	200	0.239588	3.96727	0	0	0
REACTOME_METABOLISM_OF_CARBOHYDRATES	277	0.205276	3.95923	0	0	0
REACTOME_RAB_REGULATION_OF_TRAFFICKING	115	0.313626	3.94769	0	0	0
REACTOME_C_TYPE_LECTIN_RECEPTORS_CLRS	124	0.304911	3.9372	0	0	0
REACTOME_ANTIGEN_PROCESSING_CROSS_PRESENTATION	88	0.352033	3.92304	0	0	0
REACTOME_HEDGEHOG_ON_STATE	84	0.363717	3.9134	0	0	0
KEGG_RENAL_CELL_CARCINOMA	66	0.412967	3.91131	0	0	0
REACTOME_SWITCHING_OF_ORIGINS_TO_A_POST_REPLICATIVE_STATE	88	0.347984	3.88961	0	0	0
REACTOME_INTERFERON_SIGNALING	160	0.26549	3.87409	0	0	0
REACTOME_COPII_MEDIATED_VESICLE_TRANSPORT	65	0.412804	3.86261	0	0	0
REACTOME_CELLULAR_RESPONSE_TO_HEAT_STRESS	97	0.341135	3.85842	0	0	0
REACTOME_RNA_POLYMERASE_II_TRANSCRIPTION_TERMINATION	63	0.421236	3.84133	0	0	0
PID_MTOR_4PATHWAY	69	0.393468	3.83967	0	0	0
PID_CDC42_PATHWAY	69	0.385287	3.83051	0	0	0
REACTOME_L1CAM_INTERACTIONS	110	0.306231	3.80596	0	0	0
REACTOME_METABOLISM_OF_AMINO_ACIDS_AND_DERIVATIVES	352	0.171177	3.80308	0	0	0
REACTOME_MRNA_SPLICING_MINOR_PATHWAY	51	0.443288	3.7753	0	0	0
REACTOME_TOLL_LIKE_RECEPTOR_CASCADES	146	0.273445	3.77109	0	0	0
REACTOME_UNFOLDED_PROTEIN_RESPONSE_UPR	87	0.350312	3.77005	0	0	0
REACTOME_TRANSCRIPTIONAL_REGULATION_BY_RUNX1	173	0.24124	3.7677	0	0	0
PID_FAK_PATHWAY	59	0.409016	3.76529	0	0	0
REACTOME_ABC_TRANSPORTER_DISORDERS	76	0.374723	3.76034	0	0	0
REACTOME_REGULATION_OF_RUNX2_EXPRESSION_AND_ACTIVITY	71	0.381866	3.75654	0	0	0
KEGG_CITRATE_CYCLE_TCA_CYCLE	28	0.592122	3.75549	0	0	0
REACTOME_SIGNALING_BY_INTERLEUKINS	418	0.159044	3.75545	0	0	0
REACTOME_SIGNALING_BY_VEGF	105	0.305594	3.72425	0	0	0
REACTOME_RAB_GEFS_EXCHANGE_GTP_FOR_GDP_ON_RABS	84	0.349545	3.71791	0	0	0
REACTOME_ASYMMETRIC_LOCALIZATION_OF_PCP_PROTEINS	63	0.396974	3.7168	0	0	0
REACTOME_CELLULAR_SENESCENCE	123	0.287448	3.70211	0	0	0
REACTOME_SCF_SKP2_MEDIATED_DEGRADATION_OF_P27_P21	58	0.422613	3.69864	0	0	0
REACTOME_MITOTIC_SPINDLE_CHECKPOINT	106	0.308302	3.67054	0	0	0
REACTOME_REGULATION_OF_TP53_ACTIVITY	148	0.255397	3.66971	0	0	0
REACTOME_MYD88_INDEPENDENT_TLR4_CASCADE	94	0.321974	3.6688	0	0	0
REACTOME_CYCLIN_A_CDK2_ASSOCIATED_EVENTS_AT_S_PHASE_ENTRY	83	0.344189	3.65653	0	0	0
REACTOME_TOLL_LIKE_RECEPTOR_10_TLR10_CASCADE	80	0.356362	3.65426	0	0	0
REACTOME_ORC1_REMOVAL_FROM_CHROMATIN	69	0.370775	3.64366	0	0	0
REACTOME_ACTIVATION_OF_THE_MRNA_UPON_BINDING_OF_THE_CAP_BINDING_COMPLEX_AND_EIFS_AND_SUBSEQUENT_BINDING_TO_43S	55	0.418145	3.63819	0	0	0
REACTOME_IRE1ALPHA_ACTIVATES_CHAPERONES	48	0.454088	3.63694	0	0	0
KEGG_N_GLYCAN_BIOSYNTHESIS	44	0.469948	3.63243	0	0	0
REACTOME_CELLULAR_RESPONSE_TO_HYPOXIA	70	0.363542	3.63114	0	0	0
REACTOME_RHO_GTPASES_ACTIVATE_FORMINS	129	0.271624	3.62739	0	0	0
REACTOME_REGULATION_OF_LIPID_METABOLISM_BY_PPARALPHA	117	0.287411	3.62387	0	0	0
REACTOME_COPI_DEPENDENT_GOLGI_TO_ER_RETROGRADE_TRAFFIC	90	0.329274	3.61843	0	0	0
REACTOME_RETROGRADE_TRANSPORT_AT_THE_TRANS_GOLGI_NETWORK	47	0.446062	3.61798	0	0	0
REACTOME_HCMV_INFECTION	90	0.323234	3.61551	0	0	0
REACTOME_SPHINGOLIPID_METABOLISM	82	0.34181	3.60026	0	0	0
KEGG_ERBB_SIGNALING_PATHWAY	86	0.329414	3.59777	0	0	0
REACTOME_ANTIVIRAL_MECHANISM_BY_IFN_STIMULATED_GENES	74	0.357512	3.59712	0	0	0
PID_ERBB2_ERBB3_PATHWAY	44	0.463363	3.59443	0	0	0
REACTOME_GLOBAL_GENOME_NUCLEOTIDE_EXCISION_REPAIR_GG_NER	84	0.33339	3.5738	0	0	0
REACTOME_ESR_MEDIATED_SIGNALING	160	0.241846	3.56947	0	0	0
REACTOME_TOLL_LIKE_RECEPTOR_4_TLR4_CASCADE	122	0.279244	3.56731	0	0	0
PID_REELIN_PATHWAY	28	0.568595	3.56134	0	0	0
REACTOME_PROTEIN_UBIQUITINATION	61	0.39013	3.55753	0	0	0
KEGG_OOCYTE_MEIOSIS	104	0.303519	3.55034	0	0	0
REACTOME_DNA_REPLICATION	124	0.272756	3.52584	0	0	0
KEGG_MAPK_SIGNALING_PATHWAY	259	0.188111	3.52074	0	0	0
REACTOME_CYTOSOLIC_SENSORS_OF_PATHOGEN_ASSOCIATED_DNA	57	0.382755	3.52014	0	0	0
REACTOME_TRNA_PROCESSING	98	0.303474	3.50836	0	0	0
REACTOME_ASSEMBLY_OF_THE_PRE_REPLICATIVE_COMPLEX	67	0.359025	3.50115	0	0	0
REACTOME_TRANSCRIPTION_COUPLED_NUCLEOTIDE_EXCISION_REPAIR_TC_NER	77	0.338714	3.49665	0	0	0
REACTOME_ONCOGENIC_MAPK_SIGNALING	69	0.363558	3.4946	0	0	0
KEGG_INSULIN_SIGNALING_PATHWAY	133	0.256417	3.49206	0	0	0
REACTOME_DARPP_32_EVENTS	23	0.606586	3.47641	0	0	0
REACTOME_MTOR_SIGNALLING	40	0.458806	3.46493	0	0	0
KEGG_PROGESTERONE_MEDIATED_OOCYTE_MATURATION	82	0.329209	3.457	0	0	0
REACTOME_INTEGRATION_OF_ENERGY_METABOLISM	106	0.288581	3.4557	0	0	0
BIOCARTA_MET_PATHWAY	33	0.499618	3.45361	0	0	0
BIOCARTA_MTOR_PATHWAY	21	0.636073	3.44512	0	0	0
REACTOME_TRANSCRIPTIONAL_REGULATION_BY_RUNX3	93	0.298895	3.4402	0	0	0
REACTOME_PARASITE_INFECTION	58	0.379642	3.43812	0	0	0
REACTOME_RESOLUTION_OF_SISTER_CHROMATID_COHESION	116	0.282117	3.4327	0	0	0
REACTOME_MITOPHAGY	27	0.55681	3.42815	0	0	0
KEGG_VIBRIO_CHOLERAE_INFECTION	50	0.410264	3.42769	0	0	0
KEGG_REGULATION_OF_ACTIN_CYTOSKELETON	206	0.205045	3.42493	0	0	0
REACTOME_DEATH_RECEPTOR_SIGNALLING	136	0.25175	3.41448	0	0	0
REACTOME_MITOTIC_G1_PHASE_AND_G1_S_TRANSITION	145	0.241597	3.41059	0	0	0
PID_CXCR3_PATHWAY	43	0.436227	3.40733	0	0	0
KEGG_AXON_GUIDANCE	128	0.256291	3.40649	0	0	0
REACTOME_AMINO_ACIDS_REGULATE_MTORC1	51	0.403506	3.40084	0	0	0
REACTOME_TRANSLOCATION_OF_SLC2A4_GLUT4_TO_THE_PLASMA_MEMBRANE	65	0.360137	3.39977	0	0	0
REACTOME_DNA_REPAIR	272	0.174959	3.39749	0	0	0
REACTOME_SUMOYLATION	163	0.228233	3.39656	0	0	0
REACTOME_OPIOID_SIGNALLING	89	0.302083	3.39594	0	0	0
PID_S1P_S1P3_PATHWAY	29	0.524062	3.39463	0	0	0
REACTOME_RHO_GTPASES_ACTIVATE_WASPS_AND_WAVES	36	0.472486	3.39391	0	0	0
REACTOME_PI_METABOLISM	81	0.319534	3.39061	0	0	0
REACTOME_REGULATION_OF_CHOLESTEROL_BIOSYNTHESIS_BY_SREBP_SREBF	53	0.393134	3.37937	0	0	0
KEGG_LONG_TERM_POTENTIATION	67	0.357612	3.37899	0	0	0
REACTOME_FORMATION_OF_TC_NER_PRE_INCISION_COMPLEX	52	0.391788	3.36644	0	0	0
REACTOME_GLYCOSPHINGOLIPID_METABOLISM	39	0.450831	3.35802	0	0	0
PID_NETRIN_PATHWAY	32	0.492325	3.35696	0	0	0
PID_LKB1_PATHWAY	46	0.411753	3.35637	0	0	0
REACTOME_SIGNALING_BY_NOTCH1	72	0.328205	3.33932	0	0	0
REACTOME_NUCLEAR_ENVELOPE_NE_REASSEMBLY	68	0.350734	3.32972	0	0	0
REACTOME_RESPONSE_OF_EIF2AK4_GCN2_TO_AMINO_ACID_DEFICIENCY	95	0.292046	3.32575	0	0	0
KEGG_PURINE_METABOLISM	147	0.236932	3.32111	0	0	0
REACTOME_INTERLEUKIN_12_SIGNALING	45	0.421514	3.30913	0	0	0
REACTOME_G1_S_DNA_DAMAGE_CHECKPOINTS	64	0.356805	3.3061	0	0	0
KEGG_FC_GAMMA_R_MEDIATED_PHAGOCYTOSIS	92	0.297618	3.30127	0	0	0
REACTOME_REGULATION_OF_HSF1_MEDIATED_HEAT_SHOCK_RESPONSE	78	0.315882	3.29834	0	0	0
REACTOME_SIGNALING_BY_MODERATE_KINASE_ACTIVITY_BRAF_MUTANTS	45	0.419695	3.29594	0	0	0
PID_LYSOPHOSPHOLIPID_PATHWAY	64	0.348901	3.29483	0	0	0
PID_TGFBR_PATHWAY	53	0.375471	3.29195	0	0	0
REACTOME_GENE_AND_PROTEIN_EXPRESSION_BY_JAK_STAT_SIGNALING_AFTER_INTERLEUKIN_12_STIMULATION	36	0.471424	3.27749	0	0	0
REACTOME_TOLL_LIKE_RECEPTOR_TLR1_TLR2_CASCADE	93	0.288685	3.27514	0	0	0
REACTOME_NEGATIVE_REGULATION_OF_MAPK_PATHWAY	40	0.432934	3.25716	0	0	0
KEGG_PYRIMIDINE_METABOLISM	90	0.289598	3.24604	0	0	0
REACTOME_RNA_POLYMERASE_I_TRANSCRIPTION_INITIATION	47	0.4016	3.24423	0	0	0
REACTOME_P75_NTR_RECEPTOR_MEDIATED_SIGNALLING	96	0.280253	3.2309	0	0	0
PID_ERBB1_RECEPTOR_PROXIMAL_PATHWAY	35	0.454125	3.23078	0	0	0
BIOCARTA_MAPK_PATHWAY	81	0.306758	3.22419	0	0	0
REACTOME_ENERGY_DEPENDENT_REGULATION_OF_MTOR_BY_LKB1_AMPK	29	0.501738	3.22392	0	0	0
REACTOME_PHOSPHORYLATION_SITE_MUTANTS_OF_CTNNB1_ARE_NOT_TARGETED_TO_THE_PROTEASOME_BY_THE_DESTRUCTION_COMPLEX	15	0.695135	3.21863	0	0	0
REACTOME_TRANSCRIPTIONAL_REGULATION_BY_MECP2	62	0.34126	3.21829	0	0	0
BIOCARTA_INTEGRIN_PATHWAY	34	0.450141	3.19214	0	0	0
REACTOME_COOPERATION_OF_PREFOLDIN_AND_TRIC_CCT_IN_ACTIN_AND_TUBULIN_FOLDING	28	0.510583	3.18637	0	0	0
REACTOME_METABOLISM_OF_NUCLEOTIDES	88	0.28461	3.17695	0	0	0
REACTOME_SIGNALING_BY_NUCLEAR_RECEPTORS	230	0.18388	3.17387	0	0	0
REACTOME_HCMV_LATE_EVENTS	50	0.378507	3.17122	0	0	0
KEGG_GLIOMA	62	0.346664	3.16772	0	0	0
REACTOME_INTRA_GOLGI_TRAFFIC	39	0.426476	3.16266	0	0	0
REACTOME_EUKARYOTIC_TRANSLATION_ELONGATION	89	0.29458	3.16145	0	0	0
REACTOME_N_GLYCAN_TRIMMING_IN_THE_ER_AND_CALNEXIN_CALRETICULIN_CYCLE	34	0.449857	3.16134	0	0	0
REACTOME_RNA_POLYMERASE_I_TRANSCRIPTION	50	0.376918	3.15968	0	0	0
REACTOME_SIGNALING_BY_PDGFR_IN_DISEASE	20	0.588561	3.15326	0	0	0
PID_AR_NONGENOMIC_PATHWAY	31	0.490004	3.15247	0	0	0
PID_INSULIN_PATHWAY	43	0.407327	3.14851	0	0	0
REACTOME_SNRNP_ASSEMBLY	50	0.378507	3.13989	0	0	0
KEGG_APOPTOSIS	78	0.299568	3.13482	0	0	0
PID_TELOMERASE_PATHWAY	64	0.332917	3.13216	0	0	0
REACTOME_INTERLEUKIN_12_FAMILY_SIGNALING	55	0.358923	3.1303	0	0	0
REACTOME_SELENOAMINO_ACID_METABOLISM	104	0.264079	3.12851	0	0	0
REACTOME_RMTS_METHYLATE_HISTONE_ARGININES	30	0.471508	3.11423	0	0	0
REACTOME_SIGNALING_BY_NTRK2_TRKB	24	0.525797	3.10822	0	0	0
PID_NCADHERIN_PATHWAY	33	0.458918	3.10546	0	0	0
REACTOME_DISEASES_ASSOCIATED_WITH_GLYCOSYLATION_PRECURSOR_BIOSYNTHESIS	18	0.602716	3.10348	0	0	0
REACTOME_TRANSCRIPTION_OF_THE_HIV_GENOME	62	0.334662	3.09865	0	0	0
REACTOME_NUCLEAR_ENVELOPE_BREAKDOWN	50	0.366413	3.08613	0	0	0
BIOCARTA_PYK2_PATHWAY	27	0.500105	3.08047	0	0	0
REACTOME_BIOSYNTHESIS_OF_THE_N_GLYCAN_PRECURSOR_DOLICHOL_LIPID_LINKED_OLIGOSACCHARIDE_LLO_AND_TRANSFER_TO_A_NASCENT_PROTEIN	76	0.296533	3.07765	0	0	0
PID_CXCR4_PATHWAY	99	0.266294	3.07351	0	0	0
REACTOME_ANCHORING_OF_THE_BASAL_BODY_TO_THE_PLASMA_MEMBRANE	94	0.270475	3.07251	0	0	0
REACTOME_RAB_GERANYLGERANYLATION	60	0.334842	3.0725	0	0	0
REACTOME_EPIGENETIC_REGULATION_OF_GENE_EXPRESSION	88	0.279444	3.07168	0	0	0
BIOCARTA_PTDINS_PATHWAY	23	0.530608	3.06996	0	0	0
REACTOME_NEUREXINS_AND_NEUROLIGINS	54	0.359528	3.06758	0	0	0
KEGG_RIBOSOME	83	0.28755	3.06753	0	0	0
KEGG_COLORECTAL_CANCER	61	0.334665	3.05799	0	0	0
REACTOME_GLUCAGON_LIKE_PEPTIDE_1_GLP1_REGULATES_INSULIN_SECRETION	41	0.406385	3.05108	0	0	0
REACTOME_RNA_POLYMERASE_III_TRANSCRIPTION_INITIATION_FROM_TYPE_1_PROMOTER	28	0.491136	3.0505	0	0	0
PID_IGF1_PATHWAY	29	0.472701	3.04999	0	0	0
REACTOME_CHONDROITIN_SULFATE_DERMATAN_SULFATE_METABOLISM	50	0.369829	3.03751	0	0	0
REACTOME_ENDOSOMAL_SORTING_COMPLEX_REQUIRED_FOR_TRANSPORT_ESCRT	30	0.470627	3.0362	0	6.10872e-06	0.001
KEGG_PATHOGENIC_ESCHERICHIA_COLI_INFECTION	50	0.363122	3.03062	0	6.08759e-06	0.001
KEGG_SNARE_INTERACTIONS_IN_VESICULAR_TRANSPORT	34	0.424447	3.02902	0	6.0666e-06	0.001
PID_P75_NTR_PATHWAY	64	0.321808	3.02693	0	6.04575e-06	0.001
REACTOME_BUDDING_AND_MATURATION_OF_HIV_VIRION	27	0.490492	3.02635	0	6.02504e-06	0.001
REACTOME_SIGNALING_BY_EGFR	50	0.36493	3.02543	0	6.00448e-06	0.001
KEGG_VASOPRESSIN_REGULATED_WATER_REABSORPTION	42	0.400773	3.02374	0	5.98406e-06	0.001
REACTOME_PYRUVATE_METABOLISM_AND_CITRIC_ACID_TCA_CYCLE	53	0.363361	3.02171	0	1.19706e-05	0.002
PID_S1P_S1P2_PATHWAY	24	0.513488	3.01838	0	1.19301e-05	0.002
PID_ARF_3PATHWAY	19	0.57484	3.01073	0	1.189e-05	0.002
REACTOME_TRANSCRIPTIONAL_REGULATION_BY_RUNX2	117	0.242031	3.01034	0	1.18501e-05	0.002
REACTOME_SENESCENCE_ASSOCIATED_SECRETORY_PHENOTYPE_SASP	49	0.361911	3.00889	0	1.18104e-05	0.002
REACTOME_IRON_UPTAKE_AND_TRANSPORT	53	0.356218	3.00643	0	1.17711e-05	0.002
PID_INTEGRIN_A4B1_PATHWAY	32	0.439839	3.0048	0	1.1732e-05	0.002
REACTOME_POSITIVE_EPIGENETIC_REGULATION_OF_RRNA_EXPRESSION	46	0.374236	3.00447	0	1.16931e-05	0.002
REACTOME_PINK_PARKIN_MEDIATED_MITOPHAGY	20	0.559369	3.00413	0	1.16545e-05	0.002
PID_IFNG_PATHWAY	40	0.401276	2.99945	0	1.16162e-05	0.002
REACTOME_CREB1_PHOSPHORYLATION_THROUGH_NMDA_RECEPTOR_MEDIATED_ACTIVATION_OF_RAS_SIGNALING	28	0.468342	2.99549	0	1.15781e-05	0.002
PID_ILK_PATHWAY	45	0.376946	2.99391	0	1.15403e-05	0.002
REACTOME_GLUCAGON_SIGNALING_IN_METABOLIC_REGULATION	32	0.465292	2.99339	0	1.15027e-05	0.002
REACTOME_EXTRA_NUCLEAR_ESTROGEN_SIGNALING	75	0.300025	2.99211	0	1.14653e-05	0.002
BIOCARTA_BIOPEPTIDES_PATHWAY	29	0.464625	2.98963	0	1.14282e-05	0.002
KEGG_GAP_JUNCTION	81	0.288678	2.98928	0	1.13913e-05	0.002
REACTOME_HCMV_EARLY_EVENTS	67	0.310754	2.98618	0	1.13547e-05	0.002
KEGG_CHRONIC_MYELOID_LEUKEMIA	72	0.30273	2.98485	0	1.13183e-05	0.002
REACTOME_ACTIVATION_OF_GENE_EXPRESSION_BY_SREBF_SREBP	40	0.393849	2.98374	0	1.12822e-05	0.002
PID_MYC_ACTIV_PATHWAY	76	0.296285	2.98155	0	1.12462e-05	0.002
KEGG_EPITHELIAL_CELL_SIGNALING_IN_HELICOBACTER_PYLORI_INFECTION	66	0.317415	2.98103	0	1.12105e-05	0.002
REACTOME_DNA_DAMAGE_RECOGNITION_IN_GG_NER	38	0.411859	2.97812	0	1.65278e-05	0.003
KEGG_ADIPOCYTOKINE_SIGNALING_PATHWAY	67	0.314358	2.97733	0	1.64756e-05	0.003
REACTOME_DUAL_INCISION_IN_TC_NER	64	0.324726	2.9764	0	1.64238e-05	0.003
SIG_PIP3_SIGNALING_IN_CARDIAC_MYOCTES	66	0.313241	2.97469	0	1.63723e-05	0.003
BIOCARTA_AT1R_PATHWAY	26	0.487135	2.96538	0	1.63212e-05	0.003
REACTOME_RHO_GTPASE_CYCLE	137	0.211918	2.9623	0	1.62703e-05	0.003
REACTOME_DEADENYLATION_DEPENDENT_MRNA_DECAY	53	0.346105	2.959	0	1.62198e-05	0.003
REACTOME_INTRINSIC_PATHWAY_FOR_APOPTOSIS	47	0.361911	2.95624	0	1.61696e-05	0.003
BIOCARTA_PDGF_PATHWAY	28	0.471693	2.95561	0	1.61197e-05	0.003
REACTOME_BETA_CATENIN_PHOSPHORYLATION_CASCADE	17	0.58531	2.9534	0	1.60701e-05	0.003
REACTOME_REGULATION_OF_PLK1_ACTIVITY_AT_G2_M_TRANSITION	85	0.266846	2.93983	0	2.13639e-05	0.004
REACTOME_CALNEXIN_CALRETICULIN_CYCLE	25	0.49776	2.93893	0	2.12985e-05	0.004
REACTOME_RECYCLING_PATHWAY_OF_L1	41	0.391648	2.93568	0	2.12336e-05	0.004
KEGG_TIGHT_JUNCTION	129	0.219482	2.92756	0	2.11691e-05	0.004
PID_BCR_5PATHWAY	62	0.316553	2.92504	0	2.11049e-05	0.004
REACTOME_FORMATION_OF_RNA_POL_II_ELONGATION_COMPLEX	50	0.348601	2.92475	0	2.10412e-05	0.004
REACTOME_NUCLEAR_EVENTS_KINASE_AND_TRANSCRIPTION_FACTOR_ACTIVATION	61	0.316735	2.91397	0	2.09778e-05	0.004
BIOCARTA_NDKDYNAMIN_PATHWAY	16	0.603195	2.91294	0	2.09148e-05	0.004
REACTOME_NEGATIVE_EPIGENETIC_REGULATION_OF_RRNA_EXPRESSION	49	0.343785	2.91195	0	2.08522e-05	0.004
PID_RET_PATHWAY	39	0.393769	2.90745	0	2.07899e-05	0.004
PID_ECADHERIN_NASCENT_AJ_PATHWAY	39	0.394416	2.90126	0	2.0728e-05	0.004
KEGG_RNA_POLYMERASE	27	0.460304	2.90091	0	2.06665e-05	0.004
KEGG_PANCREATIC_CANCER	69	0.302637	2.89985	0	2.06054e-05	0.004
REACTOME_RNA_POLYMERASE_III_TRANSCRIPTION	40	0.386876	2.89839	0	2.05446e-05	0.004
PID_VEGFR1_PATHWAY	26	0.480977	2.89493	0	2.04842e-05	0.004
REACTOME_HIV_TRANSCRIPTION_ELONGATION	36	0.406729	2.89294	0	2.04241e-05	0.004
PID_LIS1_PATHWAY	27	0.467488	2.88079	0	2.03644e-05	0.004
REACTOME_TRANSPORT_OF_MATURE_MRNAS_DERIVED_FROM_INTRONLESS_TRANSCRIPTS	40	0.381228	2.86705	0	2.0305e-05	0.004
PID_CERAMIDE_PATHWAY	44	0.377418	2.86516	0	2.0246e-05	0.004
REACTOME_TRANSCRIPTIONAL_REGULATION_BY_VENTX	37	0.400216	2.86189	0	2.01873e-05	0.004
BIOCARTA_MAL_PATHWAY	19	0.550149	2.85284	0	2.0129e-05	0.004
BIOCARTA_EIF4_PATHWAY	24	0.489983	2.84677	0	2.5141e-05	0.005
KEGG_FATTY_ACID_METABOLISM	35	0.401003	2.84603	0	2.50688e-05	0.005
BIOCARTA_ERAD_PATHWAY	17	0.576792	2.84177	0	2.49969e-05	0.005
REACTOME_CARGO_TRAFFICKING_TO_THE_PERICILIARY_MEMBRANE	51	0.334479	2.84001	0	2.49255e-05	0.005
REACTOME_CARGO_RECOGNITION_FOR_CLATHRIN_MEDIATED_ENDOCYTOSIS	101	0.241685	2.8397	0	2.48545e-05	0.005
REACTOME_DISORDERS_OF_TRANSMEMBRANE_TRANSPORTERS	169	0.184953	2.83948	0	2.47839e-05	0.005
REACTOME_FORMATION_OF_THE_EARLY_ELONGATION_COMPLEX	31	0.430864	2.83835	0	2.47137e-05	0.005
REACTOME_RECRUITMENT_OF_MITOTIC_CENTROSOME_PROTEINS_AND_COMPLEXES	77	0.278862	2.83164	0	2.94753e-05	0.006
REACTOME_TRANSCRIPTIONAL_REGULATION_BY_SMALL_RNAS	44	0.36474	2.8306	0	3.41833e-05	0.007
REACTOME_ESTROGEN_DEPENDENT_GENE_EXPRESSION	89	0.260105	2.82928	0	3.40873e-05	0.007
BIOCARTA_GPCR_PATHWAY	29	0.441488	2.8256	0	4.85075e-05	0.01
REACTOME_RECRUITMENT_OF_NUMA_TO_MITOTIC_CENTROSOMES	86	0.258207	2.82388	0	4.8372e-05	0.01
PID_FCER1_PATHWAY	59	0.306338	2.82377	0	4.82373e-05	0.01
REACTOME_TRAFFICKING_OF_AMPA_RECEPTORS	31	0.423141	2.82305	0	4.81033e-05	0.01
REACTOME_INTERLEUKIN_17_SIGNALING	70	0.285134	2.8229	0	4.797e-05	0.01
REACTOME_TRNA_PROCESSING_IN_THE_NUCLEUS	54	0.328267	2.8222	0	4.78375e-05	0.01
REACTOME_SYNTHESIS_OF_ACTIVE_UBIQUITIN_ROLES_OF_E1_AND_E2_ENZYMES	29	0.440664	2.81924	0	5.23335e-05	0.011
REACTOME_NETRIN_1_SIGNALING	48	0.342896	2.81759	0	5.70933e-05	0.012
REACTOME_AURKA_ACTIVATION_BY_TPX2	71	0.286127	2.81758	0	5.69369e-05	0.012
REACTOME_TNFR2_NON_CANONICAL_NF_KB_PATHWAY	97	0.238584	2.81697	0	5.67813e-05	0.012
REACTOME_MITOCHONDRIAL_CALCIUM_ION_TRANSPORT	21	0.50899	2.81694	0	5.66266e-05	0.012
PID_TNF_PATHWAY	45	0.358216	2.81162	0	6.11398e-05	0.013
REACTOME_G2_M_CHECKPOINTS	127	0.212954	2.8094	0	6.09741e-05	0.013
REACTOME_RNA_POLYMERASE_I_PROMOTER_ESCAPE	31	0.417081	2.80834	0	6.08093e-05	0.013
REACTOME_MAPK_TARGETS_NUCLEAR_EVENTS_MEDIATED_BY_MAP_KINASES	31	0.421718	2.80813	0	6.06454e-05	0.013
REACTOME_EPH_EPHRIN_MEDIATED_REPULSION_OF_CELLS	50	0.333521	2.80813	0	6.04823e-05	0.013
BIOCARTA_VIP_PATHWAY	25	0.479061	2.80209	0	6.03202e-05	0.013
REACTOME_INSULIN_PROCESSING	23	0.497597	2.80187	0	6.01589e-05	0.013
PID_ER_NONGENOMIC_PATHWAY	40	0.366379	2.80059	0	5.99985e-05	0.013
REACTOME_MTORC1_MEDIATED_SIGNALLING	23	0.491096	2.79913	0	5.98389e-05	0.013
REACTOME_ASSOCIATION_OF_TRIC_CCT_WITH_TARGET_PROTEINS_DURING_BIOSYNTHESIS	37	0.396176	2.79703	0	5.96802e-05	0.013
REACTOME_SIGNALING_BY_ERBB2	50	0.336598	2.79471	0	5.95223e-05	0.013
KEGG_NON_SMALL_CELL_LUNG_CANCER	53	0.335236	2.79323	0	6.39032e-05	0.014
KEGG_AMINO_SUGAR_AND_NUCLEOTIDE_SUGAR_METABOLISM	41	0.362885	2.79138	0	6.37351e-05	0.014
PID_RAC1_PATHWAY	54	0.31422	2.79081	0	6.35678e-05	0.014
KEGG_MTOR_SIGNALING_PATHWAY	50	0.330961	2.78813	0	6.34014e-05	0.014
REACTOME_SYNTHESIS_OF_PIPS_AT_THE_PLASMA_MEMBRANE	52	0.323391	2.78142	0	7.19722e-05	0.016
PID_TCPTP_PATHWAY	41	0.368831	2.77765	0	7.62388e-05	0.017
REACTOME_RHO_GTPASES_ACTIVATE_ROCKS	19	0.523246	2.77704	0	7.60407e-05	0.017
REACTOME_MRNA_CAPPING	28	0.442341	2.77495	0	7.58437e-05	0.017
REACTOME_CA_DEPENDENT_EVENTS	36	0.39577	2.77033	0.00203666	7.56478e-05	0.017
REACTOME_VIRAL_MESSENGER_RNA_SYNTHESIS	41	0.361086	2.76813	0	7.54528e-05	0.017
KEGG_GLYCOSAMINOGLYCAN_BIOSYNTHESIS_CHONDROITIN_SULFATE	22	0.48626	2.75808	0	7.52588e-05	0.017
PID_ENDOTHELIN_PATHWAY	62	0.2966	2.75225	0	7.50659e-05	0.017
REACTOME_RECEPTOR_TYPE_TYROSINE_PROTEIN_PHOSPHATASES	20	0.513238	2.74992	0	7.48739e-05	0.017
BIOCARTA_EIF_PATHWAY	15	0.593267	2.74694	0	7.89978e-05	0.017
REACTOME_SIGNALING_BY_NOTCH1_PEST_DOMAIN_MUTANTS_IN_CANCER	56	0.318022	2.7442	0	8.75218e-05	0.019
KEGG_RNA_DEGRADATION	54	0.314287	2.73901	0	9.15868e-05	0.02
KEGG_TOLL_LIKE_RECEPTOR_SIGNALING_PATHWAY	92	0.238931	2.7382	0	9.13549e-05	0.02
REACTOME_INTRAFLAGELLAR_TRANSPORT	51	0.324096	2.73811	0	9.11242e-05	0.02
REACTOME_CITRIC_ACID_CYCLE_TCA_CYCLE	21	0.487695	2.73659	0	9.52822e-05	0.02
REACTOME_SEALING_OF_THE_NUCLEAR_ENVELOPE_NE_BY_ESCRT_III	25	0.465353	2.73606	0	9.50428e-05	0.02
REACTOME_ACTIVATED_NOTCH1_TRANSMITS_SIGNAL_TO_THE_NUCLEUS	30	0.418435	2.73391	0	9.48046e-05	0.02
PID_ERBB1_INTERNALIZATION_PATHWAY	40	0.36576	2.73311	0	9.45676e-05	0.02
REACTOME_OTHER_SEMAPHORIN_INTERACTIONS	19	0.519003	2.73217	0	9.84423e-05	0.021
REACTOME_SIGNALLING_TO_ERKS	34	0.392925	2.72907	0	0.000102243	0.022
PID_HDAC_CLASSII_PATHWAY	34	0.391286	2.72858	0	0.00010199	0.022
KEGG_WNT_SIGNALING_PATHWAY	144	0.200131	2.72821	0	0.000101737	0.022
PID_RHOA_PATHWAY	43	0.353551	2.72725	0	0.000101486	0.022
REACTOME_DNA_REPLICATION_PRE_INITIATION	83	0.256079	2.72572	0	0.000105455	0.023
REACTOME_PKA_MEDIATED_PHOSPHORYLATION_OF_CREB	19	0.521305	2.72208	0	0.000109415	0.024
REACTOME_REGULATION_OF_INSULIN_SECRETION	76	0.26283	2.72162	0	0.000109147	0.024
PID_CASPASE_PATHWAY	50	0.325537	2.72024	0	0.00010888	0.024
REACTOME_MAP2K_AND_MAPK_ACTIVATION	40	0.358625	2.71856	0	0.000112662	0.025
REACTOME_SEMA3A_PAK_DEPENDENT_AXON_REPULSION	16	0.556094	2.71696	0	0.000112388	0.025
BIOCARTA_GLEEVEC_PATHWAY	23	0.468572	2.7167	0	0.000112115	0.025
REACTOME_SUMOYLATION_OF_DNA_DAMAGE_RESPONSE_AND_REPAIR_PROTEINS	73	0.268754	2.71337	0	0.000111844	0.025
REACTOME_RNA_POLYMERASE_II_TRANSCRIBES_SNRNA_GENES	69	0.272791	2.70755	0	0.000119825	0.027
REACTOME_INTERACTIONS_OF_REV_WITH_HOST_CELLULAR_PROTEINS	34	0.390016	2.70624	0	0.000119536	0.027
REACTOME_HDMS_DEMETHYLATE_HISTONES	22	0.470324	2.70584	0	0.000119249	0.027
BIOCARTA_NO1_PATHWAY	27	0.430652	2.70139	0	0.000118963	0.027
PID_P53_REGULATION_PATHWAY	56	0.311107	2.69985	0	0.000118678	0.027
REACTOME_DAG_AND_IP3_SIGNALING	40	0.359665	2.69789	0	0.000118395	0.027
REACTOME_FORMATION_OF_TUBULIN_FOLDING_INTERMEDIATES_BY_CCT_TRIC	21	0.484606	2.69469	0	0.000118113	0.027
BIOCARTA_EDG1_PATHWAY	22	0.48255	2.69234	0	0.000126119	0.029
REACTOME_B_WICH_COMPLEX_POSITIVELY_REGULATES_RRNA_EXPRESSION	31	0.401215	2.68575	0	0.000129977	0.03
KEGG_CHEMOKINE_SIGNALING_PATHWAY	171	0.178772	2.68513	0	0.00012967	0.03
REACTOME_FACTORS_INVOLVED_IN_MEGAKARYOCYTE_DEVELOPMENT_AND_PLATELET_PRODUCTION	130	0.201907	2.68203	0	0.00013321	0.031
REACTOME_RNA_POLYMERASE_I_TRANSCRIPTION_TERMINATION	30	0.417062	2.67953	0	0.000132897	0.031
REACTOME_RNA_POLYMERASE_III_TRANSCRIPTION_INITIATION_FROM_TYPE_3_PROMOTER	27	0.423222	2.67644	0	0.00013675	0.032
REACTOME_E3_UBIQUITIN_LIGASES_UBIQUITINATE_TARGET_PROTEINS	41	0.358132	2.67598	0	0.000140338	0.033
REACTOME_SUMOYLATION_OF_DNA_REPLICATION_PROTEINS	43	0.35052	2.6733	0	0.00014001	0.033
REACTOME_PKA_ACTIVATION_IN_GLUCAGON_SIGNALLING	16	0.558774	2.6713	0	0.000139683	0.033
KEGG_FOCAL_ADHESION	196	0.163007	2.67014	0	0.000139359	0.033
REACTOME_SYNTHESIS_OF_SUBSTRATES_IN_N_GLYCAN_BIOSYTHESIS	62	0.292911	2.66962	0	0.000142981	0.034
KEGG_PROTEIN_EXPORT	21	0.496872	2.66642	0	0.000146555	0.035
REACTOME_DOWNSTREAM_SIGNAL_TRANSDUCTION	29	0.411529	2.66285	0	0.000158555	0.038
REACTOME_RNA_POLYMERASE_III_CHAIN_ELONGATION	18	0.506801	2.66061	0	0.000158189	0.038
REACTOME_TRANSCRIPTIONAL_REGULATION_OF_WHITE_ADIPOCYTE_DIFFERENTIATION	81	0.251583	2.65755	0	0.000169732	0.04
REACTOME_COOPERATION_OF_PDCL_PHLP1_AND_TRIC_CCT_IN_G_PROTEIN_BETA_FOLDING	41	0.349788	2.65717	0	0.000169342	0.04
PID_SHP2_PATHWAY	54	0.300702	2.65473	0	0.000176612	0.042
REACTOME_NUCLEAR_PORE_COMPLEX_NPC_DISASSEMBLY	33	0.38732	2.65406	0	0.000176209	0.042
REACTOME_G_ALPHA_12_13_SIGNALLING_EVENTS	79	0.251419	2.65126	0	0.000179781	0.043
PID_MYC_PATHWAY	24	0.438998	2.65018	0	0.000179373	0.043
BIOCARTA_NFAT_PATHWAY	49	0.316618	2.64897	0	0.000178966	0.043
PID_NFAT_3PATHWAY	53	0.311101	2.64845	0	0.000178561	0.043
BIOCARTA_EGF_PATHWAY	27	0.426643	2.6321	0	0.000212529	0.052
REACTOME_RHO_GTPASES_ACTIVATE_PKNS	32	0.400947	2.63077	0	0.00021205	0.052
SIG_INSULIN_RECEPTOR_PATHWAY_IN_CARDIAC_MYOCYTES	50	0.317026	2.6268	0	0.0002152	0.053
REACTOME_METABOLISM_OF_NITRIC_OXIDE_ENOS_ACTIVATION_AND_REGULATION	15	0.554111	2.62588	0	0.000218463	0.054
REACTOME_RHO_GTPASES_ACTIVATE_PAKS	21	0.490681	2.62052	0	0.000221769	0.055
KEGG_NUCLEOTIDE_EXCISION_REPAIR	43	0.333411	2.61894	0	0.000221274	0.055
REACTOME_SEMA4D_IN_SEMAPHORIN_SIGNALING	24	0.434009	2.61661	0	0.000232112	0.058
REACTOME_HSF1_DEPENDENT_TRANSACTIVATION	37	0.371469	2.61578	0	0.000231596	0.058
REACTOME_MITOCHONDRIAL_BIOGENESIS	71	0.268607	2.61577	0	0.000231082	0.058
PID_THROMBIN_PAR1_PATHWAY	43	0.346958	2.61496	0	0.000230571	0.058
KEGG_CELL_CYCLE	121	0.202875	2.61427	0	0.000230062	0.058
PID_EPHB_FWD_PATHWAY	39	0.354821	2.6104	0	0.000240966	0.061
REACTOME_GLYCOSAMINOGLYCAN_METABOLISM	123	0.202193	2.60995	0	0.000247924	0.063
SIG_CHEMOTAXIS	44	0.328409	2.60975	0	0.00024738	0.063
REACTOME_TRANSPORT_OF_THE_SLBP_DEPENDANT_MATURE_MRNA	33	0.38732	2.60676	0	0.000254166	0.065
REACTOME_REGULATION_OF_PTEN_GENE_TRANSCRIPTION	60	0.296764	2.606	0	0.000253611	0.065
REACTOME_RAS_ACTIVATION_UPON_CA2_INFLUX_THROUGH_NMDA_RECEPTOR	20	0.487701	2.59508	0	0.000260512	0.067
REACTOME_REGULATION_OF_MECP2_EXPRESSION_AND_ACTIVITY	32	0.387439	2.59053	0	0.000267516	0.069
REACTOME_LYSOSOME_VESICLE_BIOGENESIS	34	0.383239	2.58742	0	0.000270836	0.07
BIOCARTA_IGF1MTOR_PATHWAY	18	0.504386	2.58415	0	0.000273891	0.071
REACTOME_PERK_REGULATES_GENE_EXPRESSION	29	0.401286	2.58222	0	0.000273299	0.071
REACTOME_DDX58_IFIH1_MEDIATED_INDUCTION_OF_INTERFERON_ALPHA_BETA	66	0.270248	2.58166	0	0.000276448	0.072
REACTOME_REGULATION_OF_TP53_ACTIVITY_THROUGH_PHOSPHORYLATION	86	0.232	2.58112	0	0.000275854	0.072
REACTOME_PLATELET_ACTIVATION_SIGNALING_AND_AGGREGATION	254	0.144133	2.57862	0	0.000275262	0.072
BIOCARTA_CREB_PATHWAY	21	0.47532	2.57756	0	0.000274673	0.072
REACTOME_TRNA_AMINOACYLATION	24	0.433112	2.5767	0	0.000274086	0.072
PID_FAS_PATHWAY	36	0.360802	2.57573	0	0.000273501	0.072
REACTOME_RET_SIGNALING	39	0.342397	2.5743	0	0.000276469	0.073
REACTOME_JNK_C_JUN_KINASES_PHOSPHORYLATION_AND_ACTIVATION_MEDIATED_BY_ACTIVATED_HUMAN_TAK1	22	0.441817	2.56624	0	0.000294264	0.078
PID_AURORA_A_PATHWAY	30	0.383584	2.56577	0	0.00029732	0.079
BIOCARTA_RAS_PATHWAY	22	0.450466	2.56311	0	0.000296691	0.079
PID_CDC42_REG_PATHWAY	30	0.38941	2.56073	0	0.000299443	0.08
BIOCARTA_HIVNEF_PATHWAY	54	0.298263	2.55393	0	0.000309637	0.083
REACTOME_G_ALPHA_Z_SIGNALLING_EVENTS	48	0.30904	2.55165	0	0.000312809	0.084
BIOCARTA_NOS1_PATHWAY	20	0.480856	2.54506	0	0.000315754	0.085
BIOCARTA_IGF1R_PATHWAY	22	0.450872	2.54424	0	0.000315093	0.085
REACTOME_CTLA4_INHIBITORY_SIGNALING	21	0.470657	2.5392	0	0.000332475	0.09
REACTOME_VASOPRESSIN_REGULATES_RENAL_WATER_HOMEOSTASIS_VIA_AQUAPORINS	42	0.332811	2.539	0	0.000335406	0.091
BIOCARTA_ECM_PATHWAY	19	0.466913	2.53535	0.00402414	0.000348728	0.094
PID_AVB3_OPN_PATHWAY	31	0.38534	2.5309	0	0.000358406	0.096
PID_P38_MKK3_6PATHWAY	25	0.422077	2.53065	0	0.000357664	0.096
PID_P53_DOWNSTREAM_PATHWAY	124	0.193737	2.52809	0	0.000360454	0.097
BIOCARTA_BARRESTIN_SRC_PATHWAY	17	0.511677	2.52557	0	0.000363203	0.098
REACTOME_INITIATION_OF_NUCLEAR_ENVELOPE_NE_REFORMATION	19	0.484021	2.52194	0	0.000366102	0.099
REACTOME_HIV_TRANSCRIPTION_INITIATION	46	0.317114	2.52024	0.00197628	0.000372365	0.101
REACTOME_PHOSPHORYLATION_OF_THE_APC_C	19	0.475309	2.5192	0	0.000371602	0.101
PID_MYC_REPRESS_PATHWAY	62	0.272985	2.51681	0	0.000385164	0.105
REACTOME_SIGNALING_BY_FGFR_IN_DISEASE	63	0.271362	2.51656	0	0.000384378	0.105
BIOCARTA_CERAMIDE_PATHWAY	21	0.462583	2.51564	0	0.000387021	0.106
REACTOME_NUCLEAR_IMPORT_OF_REV_PROTEIN	31	0.381604	2.51426	0	0.000396812	0.109
REACTOME_SYNAPTIC_ADHESION_LIKE_MOLECULES	21	0.444229	2.51207	0	0.000396007	0.109
REACTOME_SEMA4D_INDUCED_CELL_MIGRATION_AND_GROWTH_CONE_COLLAPSE	20	0.475635	2.51032	0	0.000405395	0.112
BIOCARTA_AGR_PATHWAY	32	0.368738	2.50285	0	0.000438896	0.121
REACTOME_SUMOYLATION_OF_UBIQUITINYLATION_PROTEINS	36	0.350409	2.50252	0	0.000441421	0.122
PID_NEPHRIN_NEPH1_PATHWAY	30	0.383024	2.5007	0	0.000440533	0.122
REACTOME_HDACS_DEACETYLATE_HISTONES	32	0.375315	2.49981	0	0.000439649	0.122
REACTOME_APC_C_CDC20_MEDIATED_DEGRADATION_OF_CYCLIN_B	23	0.441034	2.49961	0	0.000438767	0.122
REACTOME_G_PROTEIN_MEDIATED_EVENTS	53	0.294154	2.49808	0	0.000441278	0.123
REACTOME_CONVERSION_FROM_APC_C_CDC20_TO_APC_C_CDH1_IN_LATE_ANAPHASE	19	0.475309	2.49757	0	0.000443815	0.124
KEGG_ADHERENS_JUNCTION	73	0.24854	2.49393	0	0.000449639	0.126
REACTOME_TBC_RABGAPS	42	0.328431	2.493	0	0.000452293	0.126
BIOCARTA_CXCR4_PATHWAY	19	0.469983	2.4903	0	0.000454671	0.127
BIOCARTA_CK1_PATHWAY	15	0.54235	2.48856	0.00197628	0.00045707	0.128
PID_PS1_PATHWAY	45	0.310262	2.48677	0	0.000456167	0.128
REACTOME_ONCOGENE_INDUCED_SENESCENCE	33	0.359953	2.48668	0	0.000455267	0.128
PID_ECADHERIN_STABILIZATION_PATHWAY	40	0.329962	2.4832	0	0.000470959	0.132
REACTOME_PROCESSING_OF_INTRONLESS_PRE_MRNAS	19	0.475625	2.48282	0	0.000473263	0.133
REACTOME_EXPORT_OF_VIRAL_RIBONUCLEOPROTEINS_FROM_NUCLEUS	30	0.379434	2.48213	0	0.000472335	0.133
BIOCARTA_ARENRF2_PATHWAY	19	0.475535	2.48182	0	0.000471411	0.133
REACTOME_NS1_MEDIATED_EFFECTS_ON_HOST_PATHWAYS	37	0.34309	2.48162	0	0.00047049	0.133
SIG_REGULATION_OF_THE_ACTIN_CYTOSKELETON_BY_RHO_GTPASES	34	0.357712	2.48037	0.00192308	0.000473008	0.133
REACTOME_INHIBITION_OF_THE_PROTEOLYTIC_ACTIVITY_OF_APC_C_REQUIRED_FOR_THE_ONSET_OF_ANAPHASE_BY_MITOTIC_SPINDLE_CHECKPOINT_COMPONENTS	20	0.466002	2.47347	0.00191939	0.000501664	0.14
REACTOME_LEISHMANIA_INFECTION	238	0.138079	2.47054	0	0.000517144	0.144
BIOCARTA_VEGF_PATHWAY	26	0.402644	2.47009	0	0.000516142	0.144
REACTOME_FORMATION_OF_INCISION_COMPLEX_IN_GG_NER	43	0.323064	2.46993	0	0.000515143	0.144
REACTOME_SUMOYLATION_OF_CHROMATIN_ORGANIZATION_PROTEINS	53	0.283512	2.46475	0	0.000530594	0.148
REACTOME_REGULATION_OF_TP53_EXPRESSION_AND_DEGRADATION	36	0.337297	2.45946	0.00208768	0.00053935	0.149
REACTOME_PROCESSING_OF_CAPPED_INTRONLESS_PRE_MRNA	27	0.40389	2.45715	0	0.000564335	0.156
REACTOME_GLUCOSE_METABOLISM	86	0.223124	2.45537	0	0.000576314	0.159
REACTOME_INTERACTIONS_OF_VPR_WITH_HOST_CELLULAR_PROTEINS	33	0.356972	2.4515	0.00185529	0.00058803	0.161
SIG_IL4RECEPTOR_IN_B_LYPHOCYTES	26	0.404477	2.45148	0.00197628	0.000586906	0.161
REACTOME_ANTIGEN_PRESENTATION_FOLDING_ASSEMBLY_AND_PEPTIDE_LOADING_OF_CLASS_I_MHC	18	0.481306	2.44579	0	0.00061482	0.168
SA_PTEN_PATHWAY	17	0.493339	2.43564	0	0.000672254	0.185
PID_IL2_1PATHWAY	54	0.284399	2.43482	0	0.000674183	0.186
KEGG_AMYOTROPHIC_LATERAL_SCLEROSIS_ALS	52	0.285862	2.42977	0	0.000695316	0.193
PID_RAC1_REG_PATHWAY	38	0.326497	2.42897	0	0.000694	0.193
KEGG_PATHWAYS_IN_CANCER	312	0.117231	2.4277	0	0.000702453	0.195
REACTOME_OVARIAN_TUMOR_DOMAIN_PROTEASES	37	0.330931	2.42387	0	0.000729961	0.2
REACTOME_VOLTAGE_GATED_POTASSIUM_CHANNELS	43	0.316954	2.4238	0	0.000728587	0.2
REACTOME_CD209_DC_SIGN_SIGNALING	18	0.465651	2.42028	0	0.000736718	0.203
REACTOME_SIGNALING_BY_FGFR2	72	0.242564	2.417	0	0.000751206	0.206
REACTOME_LONG_TERM_POTENTIATION	23	0.420306	2.40974	0.00201613	0.000791746	0.218
REACTOME_SIGNALING_BY_FGFR	84	0.227217	2.40965	0	0.000790267	0.218
KEGG_PROSTATE_CANCER	86	0.221648	2.40929	0	0.000791935	0.219
REACTOME_SPRY_REGULATION_OF_FGF_SIGNALING	16	0.497952	2.409	0	0.00079046	0.219
REACTOME_GLYCOLYSIS	67	0.253222	2.40821	0	0.00079867	0.22
KEGG_ENDOMETRIAL_CANCER	51	0.284582	2.40779	0	0.000800397	0.22
REACTOME_GLYCEROPHOSPHOLIPID_BIOSYNTHESIS	120	0.190735	2.40739	0	0.000801988	0.221
REACTOME_NOTCH1_INTRACELLULAR_DOMAIN_REGULATES_TRANSCRIPTION	47	0.294667	2.40417	0	0.000819503	0.225
REACTOME_ER_QUALITY_CONTROL_COMPARTMENT_ERQC	20	0.447603	2.40316	0	0.000833694	0.23
REACTOME_VXPX_CARGO_TARGETING_TO_CILIUM	21	0.439219	2.40105	0	0.000844623	0.233
BIOCARTA_PAR1_PATHWAY	19	0.454004	2.39505	0	0.00088992	0.241
BIOCARTA_TNFR1_PATHWAY	29	0.367353	2.39356	0	0.000897826	0.243
PID_IL1_PATHWAY	33	0.353158	2.38956	0	0.00092741	0.251
REACTOME_EPHA_MEDIATED_GROWTH_CONE_COLLAPSE	29	0.374886	2.38722	0	0.000935075	0.252
KEGG_AMINOACYL_TRNA_BIOSYNTHESIS	22	0.433073	2.38653	0	0.000939821	0.253
REACTOME_TRAFFICKING_OF_GLUR2_CONTAINING_AMPA_RECEPTORS	17	0.481596	2.38569	0	0.00093811	0.253
PID_PI3K_PLC_TRK_PATHWAY	36	0.346208	2.38544	0	0.000936404	0.253
BIOCARTA_GSK3_PATHWAY	20	0.438559	2.383	0	0.000959481	0.259
REACTOME_SUMOYLATION_OF_SUMOYLATION_PROTEINS	32	0.350346	2.38004	0	0.000972946	0.262
REACTOME_FCGR3A_MEDIATED_IL10_SYNTHESIS	34	0.343367	2.37981	0	0.000974159	0.263
BIOCARTA_CCR5_PATHWAY	17	0.476522	2.37849	0.00195312	0.000972401	0.263
PID_PI3KCI_PATHWAY	48	0.294424	2.376	0	0.000995271	0.269
PID_WNT_NONCANONICAL_PATHWAY	32	0.356666	2.372	0	0.00101489	0.274
PID_TRAIL_PATHWAY	24	0.40793	2.36923	0	0.00103428	0.28
REACTOME_UPTAKE_AND_ACTIONS_OF_BACTERIAL_TOXINS	29	0.369321	2.36512	0.0020202	0.00106264	0.287
PID_ERA_GENOMIC_PATHWAY	63	0.245162	2.35833	0	0.00111857	0.299
REACTOME_RNA_POLYMERASE_III_TRANSCRIPTION_TERMINATION	23	0.415797	2.34881	0	0.00119599	0.315
BIOCARTA_IGF1_PATHWAY	21	0.42732	2.34871	0	0.00119386	0.315
REACTOME_SIGNALING_BY_WNT_IN_CANCER	34	0.338463	2.34858	0	0.00119174	0.315
BIOCARTA_INSULIN_PATHWAY	21	0.42053	2.34797	0	0.00119858	0.316
REACTOME_A_TETRASACCHARIDE_LINKER_SEQUENCE_IS_REQUIRED_FOR_GAG_SYNTHESIS	26	0.38329	2.3421	0	0.00124742	0.322
REACTOME_ABORTIVE_ELONGATION_OF_HIV_1_TRANSCRIPT_IN_THE_ABSENCE_OF_TAT	21	0.424489	2.34183	0	0.00124521	0.322
PID_PDGFRA_PATHWAY	22	0.416419	2.3388	0	0.00128494	0.332
PID_KIT_PATHWAY	51	0.277913	2.33797	0	0.0012856	0.333
REACTOME_REGULATION_OF_PYRUVATE_DEHYDROGENASE_PDH_COMPLEX	16	0.476813	2.33274	0.00208333	0.0013533	0.348
REACTOME_ASSEMBLY_AND_CELL_SURFACE_PRESENTATION_OF_NMDA_RECEPTORS	38	0.322024	2.33235	0	0.00135701	0.35
REACTOME_APOPTOTIC_EXECUTION_PHASE	45	0.287931	2.33193	0	0.00135463	0.35
PID_HDAC_CLASSI_PATHWAY	66	0.247507	2.32995	0	0.00137626	0.357
PID_BETA_CATENIN_DEG_PATHWAY	17	0.467572	2.32961	0	0.00137386	0.357
REACTOME_SIGNALING_BY_FGFR2_IIIA_TM	19	0.445924	2.3262	0	0.00140375	0.363
REACTOME_OXIDATIVE_STRESS_INDUCED_SENESCENCE	63	0.248603	2.32446	0	0.00140719	0.365
REACTOME_HIV_ELONGATION_ARREST_AND_RECOVERY	26	0.380078	2.32333	0	0.00142545	0.369
SIG_BCR_SIGNALING_PATHWAY	46	0.29257	2.32234	0.00204499	0.00142866	0.37
KEGG_GLYCOSAMINOGLYCAN_BIOSYNTHESIS_HEPARAN_SULFATE	26	0.38329	2.31841	0	0.00145578	0.376
BIOCARTA_RACCYCD_PATHWAY	26	0.375878	2.31073	0	0.00154432	0.396
BIOCARTA_TOLL_PATHWAY	25	0.3843	2.30574	0.00207469	0.00158583	0.407
BIOCARTA_ETS_PATHWAY	17	0.45789	2.30408	0	0.00159768	0.41
SIG_CD40PATHWAYMAP	33	0.338384	2.30113	0.00205339	0.00162421	0.415
PID_AR_PATHWAY	56	0.261959	2.30068	0	0.00163314	0.419
BIOCARTA_MPR_PATHWAY	20	0.420487	2.30033	0	0.00163326	0.419
REACTOME_HEPARAN_SULFATE_HEPARIN_HS_GAG_METABOLISM	55	0.261568	2.29259	0	0.00169725	0.433
BIOCARTA_CDMAC_PATHWAY	16	0.473863	2.29138	0	0.00170624	0.434
REACTOME_CYCLIN_D_ASSOCIATED_EVENTS_IN_G1	42	0.305331	2.28987	0.00200401	0.00172694	0.437
KEGG_INOSITOL_PHOSPHATE_METABOLISM	54	0.265762	2.28678	0	0.00175566	0.441
REACTOME_POSTMITOTIC_NUCLEAR_PORE_COMPLEX_NPC_REFORMATION	26	0.369097	2.28322	0.00215054	0.00181037	0.454
REACTOME_ACTIVATION_OF_BH3_ONLY_PROTEINS	26	0.376339	2.282	0	0.00183058	0.457
REACTOME_LATE_ENDOSOMAL_MICROAUTOPHAGY	32	0.339795	2.27957	0	0.00185389	0.462
REACTOME_CLASS_I_PEROXISOMAL_MEMBRANE_PROTEIN_IMPORT	20	0.432962	2.27803	0.00419287	0.00187108	0.465
REACTOME_DUAL_INCISION_IN_GG_NER	41	0.295959	2.27271	0.00399202	0.00195635	0.479
PID_ATF2_PATHWAY	55	0.258804	2.27165	0	0.0019644	0.482
KEGG_B_CELL_RECEPTOR_SIGNALING_PATHWAY	74	0.22751	2.26997	0	0.00198985	0.484
REACTOME_SIGNALING_BY_TGF_BETA_RECEPTOR_COMPLEX	73	0.227284	2.26976	0.00206612	0.00199235	0.484
REACTOME_FCERI_MEDIATED_MAPK_ACTIVATION	32	0.340353	2.26952	0.0019685	0.00198901	0.484
REACTOME_POTASSIUM_CHANNELS	102	0.194342	2.26898	0	0.00198858	0.485
REACTOME_BBSOME_MEDIATED_CARGO_TARGETING_TO_CILIUM	23	0.399768	2.26604	0.00194553	0.00201363	0.49
BIOCARTA_ARAP_PATHWAY	17	0.459533	2.26581	0	0.0020187	0.491
REACTOME_ATF4_ACTIVATES_GENES_IN_RESPONSE_TO_ENDOPLASMIC_RETICULUM_STRESS	25	0.378913	2.26576	0.00195695	0.00201534	0.491
PID_PRL_SIGNALING_EVENTS_PATHWAY	23	0.384956	2.26563	0	0.00201199	0.491
REACTOME_SIGNALING_BY_FGFR3	40	0.310249	2.26391	0	0.00203154	0.494
REACTOME_CHONDROITIN_SULFATE_BIOSYNTHESIS	20	0.422672	2.26261	0	0.00204227	0.495
KEGG_SPHINGOLIPID_METABOLISM	38	0.312198	2.26197	0	0.0020615	0.499
REACTOME_DISASSEMBLY_OF_THE_DESTRUCTION_COMPLEX_AND_RECRUITMENT_OF_AXIN_TO_THE_MEMBRANE	31	0.342455	2.26175	0	0.0020581	0.499
REACTOME_SUMOYLATION_OF_RNA_BINDING_PROTEINS	44	0.287066	2.25888	0	0.00209687	0.509
KEGG_PHOSPHATIDYLINOSITOL_SIGNALING_SYSTEM	74	0.226515	2.25803	0	0.00210183	0.511
REACTOME_NGF_STIMULATED_TRANSCRIPTION	39	0.301631	2.25319	0	0.00217696	0.526
REACTOME_MITOCHONDRIAL_TRNA_AMINOACYLATION	18	0.432995	2.25233	0.00206186	0.0021845	0.529
REACTOME_TNF_SIGNALING	43	0.288375	2.25152	0	0.00218385	0.529
BIOCARTA_FMLP_PATHWAY	34	0.324062	2.25012	0	0.00219981	0.533
PID_RAS_PATHWAY	30	0.343662	2.24977	0	0.00220448	0.536
REACTOME_TRANSCRIPTIONAL_ACTIVATION_OF_MITOCHONDRIAL_BIOGENESIS	51	0.266426	2.24709	0.00198413	0.00223724	0.54
REACTOME_NOTCH2_ACTIVATION_AND_TRANSMISSION_OF_SIGNAL_TO_THE_NUCLEUS	21	0.402614	2.24585	0.00204082	0.00224713	0.544
BIOCARTA_FCER1_PATHWAY	39	0.304436	2.2456	0.00203666	0.00224624	0.544
PID_MAPK_TRK_PATHWAY	34	0.32563	2.24503	0.00189394	0.00225082	0.545
REACTOME_TP53_REGULATES_TRANSCRIPTION_OF_DNA_REPAIR_GENES	54	0.259754	2.24449	0	0.00225293	0.545
PID_SYNDECAN_3_PATHWAY	16	0.476148	2.24034	0	0.0023121	0.556
PID_ARF6_TRAFFICKING_PATHWAY	47	0.280417	2.23825	0	0.00233867	0.56
BIOCARTA_MCALPAIN_PATHWAY	18	0.44148	2.23794	0	0.00233748	0.56
REACTOME_GABA_RECEPTOR_ACTIVATION	60	0.245928	2.23771	0.00391389	0.00233917	0.56
KEGG_PRION_DISEASES	33	0.327343	2.23657	0	0.00235162	0.562
REACTOME_PLATELET_SENSITIZATION_BY_LDL	17	0.45456	2.23419	0.00203666	0.00239255	0.569
REACTOME_AGGREPHAGY	37	0.304216	2.23039	0	0.00242414	0.574
REACTOME_CONSTITUTIVE_SIGNALING_BY_LIGAND_RESPONSIVE_EGFR_CANCER_VARIANTS	19	0.421549	2.22771	0	0.00244987	0.577
BIOCARTA_CHEMICAL_PATHWAY	17	0.438067	2.22729	0	0.00245417	0.578
BIOCARTA_VDR_PATHWAY	23	0.387214	2.22663	0.00194175	0.00246106	0.578
BIOCARTA_HCMV_PATHWAY	17	0.443117	2.22391	0	0.00249245	0.586
KEGG_CALCIUM_SIGNALING_PATHWAY	172	0.146314	2.22376	0	0.00249414	0.587
REACTOME_NEGATIVE_REGULATION_OF_MET_ACTIVITY	21	0.397539	2.22078	0.0019305	0.00253614	0.596
REACTOME_DISEASES_OF_IMMUNE_SYSTEM	22	0.392242	2.21838	0	0.0025591	0.598
KEGG_GNRH_SIGNALING_PATHWAY	96	0.191356	2.21397	0.00398406	0.0026309	0.607
PID_EPO_PATHWAY	33	0.328751	2.21388	0	0.00262958	0.607
REACTOME_UNBLOCKING_OF_NMDA_RECEPTORS_GLUTAMATE_BINDING_AND_ACTIVATION	21	0.399545	2.21235	0	0.00264997	0.61
REACTOME_SIGNALING_BY_PTK6	54	0.254108	2.20875	0	0.00271854	0.618
BIOCARTA_RAC1_PATHWAY	21	0.395353	2.20835	0	0.00273311	0.62
BIOCARTA_P38MAPK_PATHWAY	36	0.305751	2.2073	0	0.00274229	0.622
REACTOME_SYNTHESIS_OF_PIPS_AT_THE_EARLY_ENDOSOME_MEMBRANE	16	0.45656	2.20444	0	0.00279997	0.632
REACTOME_RHO_GTPASES_ACTIVATE_CIT	19	0.419473	2.20204	0.00199203	0.00285389	0.64
REACTOME_KSRP_KHSRP_BINDS_AND_DESTABILIZES_MRNA	16	0.454862	2.20152	0	0.00285208	0.641
REACTOME_SIGNALING_BY_CYTOSOLIC_FGFR1_FUSION_MUTANTS	18	0.42967	2.20133	0	0.00285038	0.641
REACTOME_NEGATIVE_REGULATION_OF_NMDA_RECEPTOR_MEDIATED_NEURONAL_TRANSMISSION	21	0.399545	2.19954	0.00192678	0.00288061	0.646
BIOCARTA_GCR_PATHWAY	17	0.445154	2.19946	0	0.00287876	0.647
REACTOME_ERK_MAPK_TARGETS	22	0.39366	2.19693	0.00199203	0.00291936	0.655
REACTOME_NOD1_2_SIGNALING_PATHWAY	36	0.29686	2.19611	0.00392157	0.00292512	0.657
REACTOME_CARGO_CONCENTRATION_IN_THE_ER	29	0.336711	2.19428	0.00192308	0.00295227	0.664
PID_S1P_META_PATHWAY	21	0.402247	2.19324	0.00604839	0.00296646	0.666
REACTOME_SIGNALING_BY_NTRK3_TRKC	17	0.439706	2.19247	0.00196464	0.00298536	0.672
BIOCARTA_CARDIACEGF_PATHWAY	18	0.432205	2.18842	0	0.00305929	0.679
PID_RHOA_REG_PATHWAY	46	0.270655	2.18587	0.00204918	0.00309353	0.684
REACTOME_ACTIVATION_OF_BAD_AND_TRANSLOCATION_TO_MITOCHONDRIA	15	0.483103	2.18234	0.00205761	0.00315162	0.692
REACTOME_DISEASES_OF_GLYCOSYLATION	135	0.162032	2.18179	0	0.00316497	0.692
REACTOME_SPHINGOLIPID_DE_NOVO_BIOSYNTHESIS	43	0.283957	2.18109	0	0.00317047	0.695
REACTOME_CELL_EXTRACELLULAR_MATRIX_INTERACTIONS	18	0.426066	2.18025	0.00205761	0.00319667	0.7
REACTOME_AQUAPORIN_MEDIATED_TRANSPORT	49	0.25792	2.18002	0.00200803	0.00319702	0.701
PID_AJDISS_2PATHWAY	47	0.27217	2.17578	0	0.00328109	0.711
PID_PI3KCI_AKT_PATHWAY	35	0.31057	2.16947	0.002079	0.00341051	0.724
BIOCARTA_KERATINOCYTE_PATHWAY	45	0.272364	2.16879	0.00588235	0.00342087	0.726
REACTOME_REGULATION_OF_SIGNALING_BY_CBL	22	0.388952	2.16856	0.00198807	0.00341828	0.727
REACTOME_NEGATIVE_REGULATORS_OF_DDX58_IFIH1_SIGNALING	32	0.32675	2.16763	0.0040568	0.0034313	0.728
KEGG_VALINE_LEUCINE_AND_ISOLEUCINE_DEGRADATION	41	0.283821	2.16649	0	0.00345178	0.732
REACTOME_SIGNALING_BY_ERBB2_ECD_MUTANTS	16	0.442214	2.16374	0.00198807	0.00353204	0.742
REACTOME_GABA_B_RECEPTOR_ACTIVATION	43	0.274018	2.15961	0	0.00362217	0.755
REACTOME_ACTIVATION_OF_AMPK_DOWNSTREAM_OF_NMDARS	23	0.374209	2.15446	0.00200803	0.00374972	0.769
BIOCARTA_PDZS_PATHWAY	17	0.44026	2.15341	0.00212766	0.00376672	0.77
REACTOME_CHOLESTEROL_BIOSYNTHESIS	24	0.370429	2.15335	0.00191571	0.00376377	0.77
REACTOME_RUNX1_INTERACTS_WITH_CO_FACTORS_WHOSE_PRECISE_EFFECT_ON_RUNX1_TARGETS_IS_NOT_KNOWN	37	0.298836	2.14816	0.00409836	0.00387011	0.783
PID_ARF6_DOWNSTREAM_PATHWAY	15	0.459509	2.14689	0.0019084	0.00388477	0.787
REACTOME_PYRUVATE_METABOLISM	30	0.335903	2.14252	0.00207039	0.00399051	0.797
REACTOME_TRAF6_MEDIATED_NF_KB_ACTIVATION	23	0.366945	2.13799	0.00196464	0.00411083	0.805
KEGG_CYTOSOLIC_DNA_SENSING_PATHWAY	44	0.27757	2.1375	0.00205761	0.00410718	0.805
REACTOME_INTERFERON_ALPHA_BETA_SIGNALING	52	0.251624	2.13727	0.00590551	0.00410601	0.805
REACTOME_INSERTION_OF_TAIL_ANCHORED_PROTEINS_INTO_THE_ENDOPLASMIC_RETICULUM_MEMBRANE	18	0.420108	2.13422	0.00207039	0.0041655	0.813
BIOCARTA_LIS1_PATHWAY	18	0.423253	2.13335	0	0.00417694	0.815
REACTOME_ATTENUATION_PHASE	27	0.345169	2.13309	0.00590551	0.00417586	0.816
PID_P38_ALPHA_BETA_PATHWAY	30	0.325814	2.13301	0	0.0041723	0.816
BIOCARTA_CASPASE_PATHWAY	21	0.381559	2.13252	0	0.00417598	0.816
REACTOME_ACTIVATION_OF_KAINATE_RECEPTORS_UPON_GLUTAMATE_BINDING	30	0.330475	2.13186	0.00399202	0.00418773	0.816
REACTOME_HSF1_ACTIVATION	30	0.323967	2.1315	0	0.00419425	0.817
REACTOME_APC_CDC20_MEDIATED_DEGRADATION_OF_NEK2A	25	0.355983	2.13032	0.00409836	0.00424344	0.824
KEGG_RIG_I_LIKE_RECEPTOR_SIGNALING_PATHWAY	59	0.238748	2.12675	0.00206612	0.00435013	0.828
BIOCARTA_CCR3_PATHWAY	19	0.401327	2.12585	0.00424628	0.00436587	0.829
PID_HEDGEHOG_GLI_PATHWAY	48	0.254698	2.12306	0.00196464	0.00443416	0.837
REACTOME_EPHRIN_SIGNALING	19	0.417893	2.11958	0.00627615	0.00449508	0.845
REACTOME_INOSITOL_PHOSPHATE_METABOLISM	48	0.258918	2.11574	0.00403226	0.00460066	0.857
REACTOME_SIGNALING_BY_FGFR1	49	0.25957	2.11088	0.00595238	0.00472523	0.865
KEGG_ACUTE_MYELOID_LEUKEMIA	57	0.23648	2.11072	0	0.00473091	0.865
BIOCARTA_HDAC_PATHWAY	25	0.347307	2.11055	0.00403226	0.00472661	0.865
REACTOME_CONSTITUTIVE_SIGNALING_BY_EGFRVIII	15	0.456585	2.10969	0.00391389	0.00474487	0.868
REACTOME_SIGNALING_BY_ERBB4	58	0.23546	2.10302	0.00395257	0.00493278	0.882
REACTOME_THE_ROLE_OF_NEF_IN_HIV_1_REPLICATION_AND_DISEASE_PATHOGENESIS	26	0.343132	2.10159	0	0.00496936	0.885
REACTOME_SUMOYLATION_OF_TRANSCRIPTION_COFACTORS	40	0.282371	2.09734	0.00392927	0.00510066	0.891
REACTOME_SIGNAL_AMPLIFICATION	33	0.304808	2.09673	0	0.00510551	0.892
REACTOME_CIRCADIAN_CLOCK	69	0.212497	2.09139	0.00826446	0.00527591	0.895
REACTOME_MRNA_DECAY_BY_3_TO_5_EXORIBONUCLEASE	15	0.439913	2.09013	0	0.00530041	0.896
REACTOME_METAL_ION_SLC_TRANSPORTERS	26	0.330244	2.08516	0.00596422	0.00546836	0.904
BIOCARTA_SPPA_PATHWAY	16	0.435399	2.0848	0.00829876	0.00547281	0.905
REACTOME_RHO_GTPASES_ACTIVATE_IQGAPS	26	0.345749	2.08432	0	0.00548202	0.906
BIOCARTA_MEF2D_PATHWAY	18	0.39341	2.08408	0.00616016	0.00548166	0.906
KEGG_BASAL_TRANSCRIPTION_FACTORS	34	0.299309	2.07897	0	0.00563484	0.912
BIOCARTA_TPO_PATHWAY	24	0.360998	2.07721	0.00833333	0.00570431	0.915
REACTOME_DISEASES_OF_PROGRAMMED_CELL_DEATH	23	0.357823	2.07388	0.00375235	0.00582778	0.919
KEGG_PEROXISOME	77	0.201543	2.07265	0.00614754	0.00586822	0.92
BIOCARTA_DEATH_PATHWAY	28	0.332961	2.07233	0.00406504	0.00587192	0.92
REACTOME_FATTY_ACYL_COA_BIOSYNTHESIS	32	0.302678	2.07062	0	0.00593129	0.922
REACTOME_VEGFR2_MEDIATED_VASCULAR_PERMEABILITY	27	0.331005	2.06791	0.00402414	0.00601226	0.924
BIOCARTA_CHREBP_PATHWAY	18	0.403769	2.06069	0	0.00625467	0.933
PID_IL8_CXCR2_PATHWAY	32	0.299893	2.05969	0.00195695	0.00628197	0.933
PID_IL6_7_PATHWAY	46	0.258448	2.05709	0.0020202	0.00636738	0.937
REACTOME_IKK_COMPLEX_RECRUITMENT_MEDIATED_BY_RIP1	22	0.370373	2.05559	0.0056391	0.00641347	0.939
REACTOME_CELL_DEATH_SIGNALLING_VIA_NRAGE_NRIF_AND_NADE	75	0.205	2.0546	0.00761905	0.0064551	0.939
REACTOME_NR1H3_NR1H2_REGULATE_GENE_EXPRESSION_LINKED_TO_CHOLESTEROL_TRANSPORT_AND_EFFLUX	36	0.283304	2.05453	0.00421941	0.00644832	0.939
REACTOME_WNT5A_DEPENDENT_INTERNALIZATION_OF_FZD4	15	0.445257	2.05402	0.004	0.00645607	0.939
BIOCARTA_NTHI_PATHWAY	22	0.368348	2.05135	0.003861	0.00656189	0.942
REACTOME_INSULIN_RECEPTOR_RECYCLING	24	0.343447	2.05057	0.0019685	0.00658139	0.943
BIOCARTA_FAS_PATHWAY	28	0.323077	2.04734	0.00635593	0.00672657	0.944
REACTOME_FGFR2_ALTERNATIVE_SPLICING	27	0.325506	2.04164	0.00775194	0.00696148	0.949
REACTOME_CONSTITUTIVE_SIGNALING_BY_AKT1_E17K_IN_CANCER	26	0.338664	2.04131	0.00207039	0.00696137	0.949
REACTOME_DNA_DAMAGE_BYPASS	46	0.251582	2.04111	0.00976562	0.00696116	0.95
BIOCARTA_IL6_PATHWAY	20	0.379985	2.03944	0.00209644	0.00702909	0.952
REACTOME_LDL_CLEARANCE	18	0.399842	2.03791	0.00813008	0.00708277	0.952
REACTOME_VEGFR2_MEDIATED_CELL_PROLIFERATION	19	0.397265	2.03748	0.00619835	0.00709401	0.952
PID_GMCSF_PATHWAY	35	0.287915	2.03538	0.00404858	0.00715465	0.954
REACTOME_COSTIMULATION_BY_THE_CD28_FAMILY	57	0.225176	2.03328	0.00199203	0.00725448	0.957
REACTOME_APOPTOTIC_CLEAVAGE_OF_CELLULAR_PROTEINS	37	0.275103	2.03261	0.008	0.00726591	0.957
REACTOME_SYNTHESIS_OF_PIPS_AT_THE_GOLGI_MEMBRANE	17	0.406821	2.03234	0.00416667	0.00726061	0.957
REACTOME_CRMPS_IN_SEMA3A_SIGNALING	16	0.415757	2.03208	0.00558659	0.00725987	0.957
REACTOME_GLYCOGEN_METABOLISM	25	0.337882	2.03017	0.00404858	0.00730132	0.958
REACTOME_G_PROTEIN_BETA_GAMMA_SIGNALLING	32	0.300687	2.02665	0.00199601	0.0074731	0.962
REACTOME_GENE_SILENCING_BY_RNA	75	0.196204	2.02656	0.00585938	0.00746513	0.962
REACTOME_ADP_SIGNALLING_THROUGH_P2Y_PURINOCEPTOR_12	22	0.361671	2.02591	0.00391389	0.00748277	0.962
PID_S1P_S1P1_PATHWAY	21	0.37173	2.02514	0.00200803	0.00750281	0.963
REACTOME_GASTRIN_CREB_SIGNALLING_PATHWAY_VIA_PKC_AND_MAPK	18	0.388701	2.0234	0.0102041	0.00757894	0.963
REACTOME_E2F_MEDIATED_REGULATION_OF_DNA_REPLICATION	21	0.365404	2.02298	0.00201207	0.00758718	0.963
KEGG_CARDIAC_MUSCLE_CONTRACTION	72	0.20254	2.02192	0.00204918	0.00762331	0.964
KEGG_GLYCEROPHOSPHOLIPID_METABOLISM	75	0.193353	2.01994	0.0040568	0.00771505	0.965
REACTOME_SIGNALING_BY_TGF_BETA_FAMILY_MEMBERS	102	0.169837	2.01956	0	0.00772072	0.965
REACTOME_SIGNAL_TRANSDUCTION_BY_L1	21	0.365984	2.01881	0.00205761	0.00774966	0.965
KEGG_LEUKOCYTE_TRANSENDOTHELIAL_MIGRATION	113	0.162716	2.01679	0.00192308	0.00783403	0.967
BIOCARTA_WNT_PATHWAY	24	0.350812	2.01605	0.00408163	0.00786276	0.967
REACTOME_MICRORNA_MIRNA_BIOGENESIS	25	0.339052	2.0127	0.00595238	0.00799466	0.969
REACTOME_NEF_MEDIATES_DOWN_MODULATION_OF_CELL_SURFACE_RECEPTORS_BY_RECRUITING_THEM_TO_CLATHRIN_ADAPTERS	19	0.389456	2.00945	0.0102881	0.00818594	0.971
PID_FOXO_PATHWAY	48	0.243506	2.00577	0.00622407	0.00835721	0.972
BIOCARTA_PPARA_PATHWAY	51	0.237685	2.00462	0.00575816	0.00841264	0.972
REACTOME_SIGNALING_BY_FGFR1_IN_DISEASE	38	0.27775	1.9974	0.00198413	0.00881539	0.976
REACTOME_RESOLUTION_OF_AP_SITES_VIA_THE_MULTIPLE_NUCLEOTIDE_PATCH_REPLACEMENT_PATHWAY	25	0.341802	1.9969	0.00412371	0.00883064	0.976
REACTOME_TGF_BETA_RECEPTOR_SIGNALING_ACTIVATES_SMADS	32	0.292026	1.99231	0.00394477	0.00903976	0.978
REACTOME_DNA_DOUBLE_STRAND_BREAK_RESPONSE	37	0.27976	1.9898	0.00423729	0.00916672	0.979
BIOCARTA_TCR_PATHWAY	44	0.248782	1.98749	0.00616016	0.0092893	0.98
REACTOME_SIGNALING_BY_NOTCH3	48	0.245025	1.98479	0.00391389	0.00941602	0.981
REACTOME_DISEASES_ASSOCIATED_WITH_N_GLYCOSYLATION_OF_PROTEINS	17	0.398936	1.98259	0.00401606	0.00953312	0.982
REACTOME_SIALIC_ACID_METABOLISM	33	0.2873	1.97991	0.00393701	0.00964931	0.984
REACTOME_REGULATION_OF_GLUCOKINASE_BY_GLUCOKINASE_REGULATORY_PROTEIN	29	0.308059	1.97793	0.00628931	0.00972477	0.985
REACTOME_GAMMA_CARBOXYLATION_HYPUSINE_FORMATION_AND_ARYLSULFATASE_ACTIVATION	34	0.280466	1.97196	0.0102249	0.010055	0.986
KEGG_LONG_TERM_DEPRESSION	67	0.205575	1.96809	0.00392927	0.0102581	0.986
KEGG_PROPANOATE_METABOLISM	30	0.302177	1.96805	0.00829876	0.0102467	0.986
KEGG_SMALL_CELL_LUNG_CANCER	81	0.1863	1.96577	0.004	0.0103821	0.988
PID_HIF1_TFPATHWAY	63	0.214697	1.96092	0.00409836	0.0106813	0.992
REACTOME_RESPONSE_TO_ELEVATED_PLATELET_CYTOSOLIC_CA2	126	0.147469	1.96037	0.00422833	0.0106961	0.992
PID_EPHA2_FWD_PATHWAY	19	0.371084	1.95846	0.00408163	0.0108103	0.992
REACTOME_G_BETA_GAMMA_SIGNALLING_THROUGH_CDC42	20	0.359191	1.95585	0.00194932	0.0109517	0.992
KEGG_PYRUVATE_METABOLISM	37	0.274175	1.95573	0.00402414	0.0109439	0.992
REACTOME_THROMBIN_SIGNALLING_THROUGH_PROTEINASE_ACTIVATED_RECEPTORS_PARS	32	0.295353	1.9552	0.00579151	0.0109519	0.992
REACTOME_TIE2_SIGNALING	18	0.381133	1.95513	0.008	0.0109398	0.992
REACTOME_DEACTIVATION_OF_THE_BETA_CATENIN_TRANSACTIVATING_COMPLEX	42	0.251793	1.94947	0.00203666	0.0112608	0.993
PID_ALPHA_SYNUCLEIN_PATHWAY	31	0.297396	1.9492	0.003861	0.0112637	0.993
REACTOME_TAK1_ACTIVATES_NFKB_BY_PHOSPHORYLATION_AND_ACTIVATION_OF_IKKS_COMPLEX	31	0.301245	1.94501	0.0039604	0.0115087	0.994
REACTOME_SIGNALING_BY_ERYTHROPOIETIN	25	0.326484	1.94433	0	0.0115362	0.994
REACTOME_SIGNALING_BY_FGFR2_IN_DISEASE	43	0.245483	1.9435	0.0114943	0.0115456	0.994
PID_NOTCH_PATHWAY	57	0.216585	1.93926	0.00403226	0.0118545	0.997
REACTOME_ZBP1_DAI_MEDIATED_INDUCTION_OF_TYPE_I_IFNS	20	0.364391	1.93904	0.0102041	0.0118501	0.997
BIOCARTA_41BB_PATHWAY	17	0.395726	1.93798	0.0020202	0.0119136	0.997
REACTOME_TP53_REGULATES_TRANSCRIPTION_OF_CELL_CYCLE_GENES	47	0.245292	1.93716	0.00860215	0.0119601	0.997
REACTOME_INTERFERON_GAMMA_SIGNALING	66	0.20672	1.93511	0.00591716	0.0121062	0.997
REACTOME_NUCLEOTIDE_BINDING_DOMAIN_LEUCINE_RICH_REPEAT_CONTAINING_RECEPTOR_NLR_SIGNALING_PATHWAYS	53	0.227214	1.93345	0.00795229	0.0122138	0.997
REACTOME_METABOLISM_OF_WATER_SOLUBLE_VITAMINS_AND_COFACTORS	113	0.156528	1.93328	0.00934579	0.0122067	0.997
REACTOME_TRNA_MODIFICATION_IN_THE_NUCLEUS_AND_CYTOSOL	38	0.256923	1.93167	0.00570342	0.0123085	0.997
PID_ANTHRAX_PATHWAY	16	0.410082	1.93018	0.0124481	0.012385	0.997
KEGG_LEISHMANIA_INFECTION	51	0.23268	1.92987	0.00575816	0.0123973	0.997
REACTOME_POST_CHAPERONIN_TUBULIN_FOLDING_PATHWAY	19	0.376862	1.92896	0.00584795	0.0124406	0.997
REACTOME_PLATELET_HOMEOSTASIS	84	0.177503	1.92882	0.00623701	0.0124312	0.997
REACTOME_CHROMOSOME_MAINTENANCE	66	0.201405	1.92826	0.0161616	0.0124372	0.997
REACTOME_SIGNALING_BY_ERBB2_IN_CANCER	26	0.320717	1.92714	0.0158416	0.0125062	0.997
REACTOME_NRAGE_SIGNALS_DEATH_THROUGH_JNK	58	0.216609	1.92554	0.00785855	0.0125923	0.997
BIOCARTA_BCR_PATHWAY	33	0.287637	1.92283	0.00988142	0.0127465	0.997
REACTOME_TRAF6_MEDIATED_INDUCTION_OF_TAK1_COMPLEX_WITHIN_TLR4_COMPLEX	16	0.407021	1.91854	0.00618557	0.0130181	0.997
KEGG_GLUTATHIONE_METABOLISM	48	0.235249	1.91812	0.00967118	0.0130232	0.997
REACTOME_G_BETA_GAMMA_SIGNALLING_THROUGH_PI3KGAMMA	25	0.320614	1.91692	0.0144628	0.0130842	0.997
REACTOME_SIGNALING_BY_MET	79	0.182665	1.91665	0.0105042	0.0131111	0.997
PID_TXA2PATHWAY	56	0.216636	1.91355	0.00601202	0.0132703	0.998
REACTOME_DEADENYLATION_OF_MRNA	23	0.329114	1.90381	0.016129	0.0141096	0.998
BIOCARTA_NGF_PATHWAY	19	0.374605	1.90311	0.00770713	0.0141625	0.998
PID_HIF1A_PATHWAY	16	0.394085	1.90205	0.00988142	0.0142175	0.998
PID_ECADHERIN_KERATINOCYTE_PATHWAY	21	0.342607	1.89811	0.00626305	0.0145085	0.999
PID_NECTIN_PATHWAY	30	0.290254	1.8979	0.00785855	0.0145158	0.999
REACTOME_SIGNALING_BY_EGFR_IN_CANCER	25	0.309958	1.89618	0.00796813	0.0146454	0.999
REACTOME_NEGATIVE_REGULATION_OF_THE_PI3K_AKT_NETWORK	106	0.158535	1.89336	0.012	0.0148924	0.999
BIOCARTA_STRESS_PATHWAY	24	0.324507	1.89091	0.00645161	0.0150599	0.999
KEGG_REGULATION_OF_AUTOPHAGY	25	0.311006	1.8888	0.00213675	0.0151972	0.999
KEGG_FRUCTOSE_AND_MANNOSE_METABOLISM	32	0.281864	1.88814	0.00616016	0.0152312	0.999
PID_RETINOIC_ACID_PATHWAY	30	0.292851	1.88497	0.0125	0.0154936	0.999
REACTOME_INTERACTION_BETWEEN_L1_AND_ANKYRINS	29	0.293077	1.88331	0.0101833	0.0156192	0.999
BIOCARTA_TGFB_PATHWAY	19	0.353029	1.88303	0.0100604	0.0156189	0.999
BIOCARTA_SPRY_PATHWAY	17	0.375601	1.88248	0.0141988	0.0156357	0.999
PID_LPA4_PATHWAY	15	0.402997	1.88004	0.0165289	0.0158149	0.999
KEGG_OTHER_GLYCAN_DEGRADATION	16	0.395143	1.87888	0.0117647	0.0159155	0.999
REACTOME_METABOLISM_OF_VITAMINS_AND_COFACTORS	176	0.119735	1.8735	0.011976	0.0163157	0.999
REACTOME_DEPOLYMERISATION_OF_THE_NUCLEAR_LAMINA	15	0.406237	1.87254	0.018595	0.0163713	0.999
BIOCARTA_CARM_ER_PATHWAY	25	0.305283	1.86877	0.01	0.0167263	1
REACTOME_BMAL1_CLOCK_NPAS2_ACTIVATES_CIRCADIAN_GENE_EXPRESSION	27	0.302071	1.86736	0.00959693	0.0168276	1
REACTOME_NEUROTRANSMITTER_RELEASE_CYCLE	50	0.218461	1.86523	0.012474	0.0170239	1
REACTOME_BRANCHED_CHAIN_AMINO_ACID_CATABOLISM	21	0.335629	1.85955	0.02	0.0175341	1
REACTOME_THROMBOXANE_SIGNALLING_THROUGH_TP_RECEPTOR	24	0.316199	1.85767	0.00790514	0.0177049	1
PID_IL8_CXCR1_PATHWAY	27	0.299693	1.85694	0.011811	0.0177672	1
PID_PTP1B_PATHWAY	49	0.228589	1.85565	0.015873	0.0178729	1
KEGG_GLYCOSPHINGOLIPID_BIOSYNTHESIS_GANGLIO_SERIES	15	0.40056	1.85285	0.0160966	0.0181274	1
REACTOME_ACTIVATED_TAK1_MEDIATES_P38_MAPK_ACTIVATION	23	0.324371	1.84942	0.0134875	0.0185009	1
PID_REG_GR_PATHWAY	76	0.176902	1.84404	0.0138889	0.0190233	1
PID_FGF_PATHWAY	54	0.211565	1.84092	0.0140562	0.0193381	1
BIOCARTA_P53_PATHWAY	15	0.39027	1.8364	0.01002	0.0197575	1
REACTOME_REGULATION_OF_RUNX1_EXPRESSION_AND_ACTIVITY	17	0.363261	1.83443	0.0100402	0.0199553	1
KEGG_T_CELL_RECEPTOR_SIGNALING_PATHWAY	105	0.154195	1.83364	0.0168776	0.0200014	1
REACTOME_ERCC6_CSB_AND_EHMT2_G9A_POSITIVELY_REGULATE_RRNA_EXPRESSION	16	0.392875	1.83344	0.0186335	0.0199996	1
KEGG_ANTIGEN_PROCESSING_AND_PRESENTATION	47	0.227544	1.83293	0.0119522	0.0200332	1
REACTOME_REGULATION_OF_TP53_ACTIVITY_THROUGH_ACETYLATION	28	0.29525	1.83208	0.00992064	0.020098	1
REACTOME_TICAM1_RIP1_MEDIATED_IKK_COMPLEX_RECRUITMENT	18	0.360197	1.83047	0.01341	0.0202399	1
REACTOME_EGFR_DOWNREGULATION	31	0.273863	1.82843	0.00394477	0.0204547	1
BIOCARTA_CELLCYCLE_PATHWAY	23	0.307304	1.82632	0.0159046	0.0206728	1
REACTOME_SIGNALING_BY_FGFR4	40	0.253729	1.82398	0.0238612	0.0209117	1
REACTOME_DOWNREGULATION_OF_ERBB2_SIGNALING	29	0.280394	1.82382	0.006	0.0208966	1
REACTOME_NOTCH3_ACTIVATION_AND_TRANSMISSION_OF_SIGNAL_TO_THE_NUCLEUS	24	0.307328	1.82234	0.011976	0.0210352	1
REACTOME_BASIGIN_INTERACTIONS	24	0.30182	1.82155	0.00798403	0.0210935	1
REACTOME_DOWNREGULATION_OF_TGF_BETA_RECEPTOR_SIGNALING	26	0.297139	1.81892	0.0120482	0.0213774	1
REACTOME_TNFR1_INDUCED_NFKAPPAB_SIGNALING_PATHWAY	30	0.271129	1.81792	0.0155642	0.0214412	1
REACTOME_SIGNALING_BY_SCF_KIT	42	0.238228	1.81284	0.0143443	0.0220541	1
REACTOME_ACTIVATION_OF_IRF3_IRF7_MEDIATED_BY_TBK1_IKK_EPSILON	17	0.358554	1.81183	0.0206186	0.0221435	1
BIOCARTA_RHO_PATHWAY	21	0.32693	1.81158	0.0198807	0.0221397	1
REACTOME_MAP3K8_TPL2_DEPENDENT_MAPK1_3_ACTIVATION	15	0.389259	1.80891	0.0174419	0.0224342	1
REACTOME_PROSTACYCLIN_SIGNALLING_THROUGH_PROSTACYCLIN_RECEPTOR	19	0.342466	1.80631	0.0222222	0.0227198	1
PID_PLK1_PATHWAY	45	0.231252	1.80185	0.0182556	0.0232724	1
REACTOME_ACTIVATION_OF_ANTERIOR_HOX_GENES_IN_HINDBRAIN_DEVELOPMENT_DURING_EARLY_EMBRYOGENESIS	59	0.197561	1.79943	0.0117878	0.0235379	1
KEGG_P53_SIGNALING_PATHWAY	62	0.190574	1.79174	0.0184805	0.0245944	1
PID_TOLL_ENDOGENOUS_PATHWAY	23	0.317238	1.79069	0.0140562	0.0247268	1
BIOCARTA_ERK_PATHWAY	26	0.29655	1.78908	0.0137795	0.0248975	1
BIOCARTA_MITOCHONDRIA_PATHWAY	19	0.340435	1.78885	0.0203252	0.0248965	1
REACTOME_NEPHRIN_FAMILY_INTERACTIONS	22	0.316752	1.78811	0.0197628	0.0249843	1
REACTOME_TRANSCRIPTIONAL_ACTIVITY_OF_SMAD2_SMAD3_SMAD4_HETEROTRIMER	44	0.230724	1.78784	0.0140281	0.0250009	1
REACTOME_TRANSFERRIN_ENDOCYTOSIS_AND_RECYCLING	29	0.281565	1.78764	0.0223577	0.0249916	1
PID_NFKAPPAB_CANONICAL_PATHWAY	23	0.308156	1.78665	0.0175439	0.0250945	1
SA_CASPASE_CASCADE	17	0.359064	1.78619	0.0242915	0.0251313	1
REACTOME_SIGNALING_BY_NOTCH2	31	0.263545	1.78115	0.0174419	0.0257912	1
REACTOME_INTERCONVERSION_OF_NUCLEOTIDE_DI_AND_TRIPHOSPHATES	25	0.295936	1.78048	0.0120968	0.0258346	1
REACTOME_ROLE_OF_LAT2_NTAL_LAB_ON_CALCIUM_MOBILIZATION	16	0.366103	1.77818	0.0213592	0.02608	1
PID_EPHA_FWDPATHWAY	34	0.258159	1.77661	0.00961539	0.0262443	1
REACTOME_SIGNALING_BY_INSULIN_RECEPTOR	74	0.175988	1.7761	0.00954198	0.0262533	1
REACTOME_P75NTR_SIGNALS_VIA_NF_KB	16	0.367872	1.77589	0.0162602	0.0262662	1
PID_ANGIOPOIETIN_RECEPTOR_PATHWAY	48	0.213477	1.77508	0.0245399	0.0263367	1
REACTOME_DNA_STRAND_ELONGATION	32	0.259996	1.77308	0.0164609	0.0265358	1
PID_IL2_PI3K_PATHWAY	33	0.256245	1.77307	0.0205339	0.0265049	1
REACTOME_TRANSLESION_SYNTHESIS_BY_Y_FAMILY_DNA_POLYMERASES_BYPASSES_LESIONS_ON_DNA_TEMPLATE	37	0.24736	1.7708	0.0282258	0.0268767	1
SA_B_CELL_RECEPTOR_COMPLEXES	24	0.298518	1.76955	0.0151188	0.0270243	1
REACTOME_SYNTHESIS_OF_PC	28	0.275381	1.76921	0.0233051	0.0270405	1
REACTOME_LISTERIA_MONOCYTOGENES_ENTRY_INTO_HOST_CELLS	20	0.33463	1.76812	0.020284	0.0272065	1
BIOCARTA_AKT_PATHWAY	20	0.327211	1.76806	0.0313112	0.0271846	1
BIOCARTA_STATHMIN_PATHWAY	19	0.335019	1.7659	0.00998004	0.027434	1
PID_AURORA_B_PATHWAY	37	0.243442	1.76515	0.00739372	0.0275294	1
BIOCARTA_TEL_PATHWAY	16	0.365364	1.76483	0.0238569	0.0275547	1
REACTOME_BASE_EXCISION_REPAIR	44	0.220688	1.76433	0.0149813	0.0275892	1
REACTOME_FATTY_ACID_METABOLISM	154	0.1219	1.76337	0.0188679	0.0276899	1
BIOCARTA_IL2RB_PATHWAY	36	0.247162	1.7604	0.0197239	0.0280942	1
KEGG_ARGININE_AND_PROLINE_METABOLISM	50	0.209383	1.75861	0.0212766	0.0283576	1
REACTOME_GAP_JUNCTION_TRAFFICKING_AND_REGULATION	42	0.226547	1.75791	0.0139721	0.0284151	1
REACTOME_REGULATION_OF_TNFR1_SIGNALING	33	0.260126	1.7567	0.0228571	0.028571	1
BIOCARTA_BAD_PATHWAY	22	0.314373	1.7539	0.0247619	0.0289673	1
REACTOME_MECP2_REGULATES_NEURONAL_RECEPTORS_AND_CHANNELS	18	0.342376	1.75165	0.0271399	0.029284	1
REACTOME_PCNA_DEPENDENT_LONG_PATCH_BASE_EXCISION_REPAIR	21	0.318862	1.74883	0.0152964	0.0296856	1
REACTOME_DEFECTIVE_B4GALT7_CAUSES_EDS_PROGEROID_TYPE	20	0.322582	1.74592	0.0186722	0.0300961	1
REACTOME_GLUTAMATE_NEUROTRANSMITTER_RELEASE_CYCLE	23	0.29768	1.74443	0.0216963	0.0303164	1
KEGG_FC_EPSILON_RI_SIGNALING_PATHWAY	76	0.16939	1.73884	0.0238095	0.0312251	1
REACTOME_RIP_MEDIATED_NFKB_ACTIVATION_VIA_ZBP1	17	0.355511	1.73454	0.0229645	0.0318834	1
KEGG_BIOSYNTHESIS_OF_UNSATURATED_FATTY_ACIDS	19	0.340706	1.729	0.0179283	0.0327846	1
PID_P73PATHWAY	72	0.171795	1.72889	0.0212355	0.0327744	1
REACTOME_METABOLISM_OF_COFACTORS	19	0.338178	1.72865	0.0213592	0.0327662	1
REACTOME_NR1H2_AND_NR1H3_MEDIATED_SIGNALING	44	0.22268	1.72653	0.0292398	0.0330873	1
REACTOME_DETOXIFICATION_OF_REACTIVE_OXYGEN_SPECIES	34	0.254047	1.72231	0.0213592	0.0338232	1
PID_P38_ALPHA_BETA_DOWNSTREAM_PATHWAY	37	0.240803	1.72002	0.0254902	0.0341723	1
REACTOME_PROTEIN_METHYLATION	16	0.349207	1.71816	0.0386847	0.0344646	1
REACTOME_INLB_MEDIATED_ENTRY_OF_LISTERIA_MONOCYTOGENES_INTO_HOST_CELL	15	0.35931	1.71738	0.0176471	0.0345717	1
BIOCARTA_HIF_PATHWAY	15	0.360312	1.7135	0.0250965	0.0352318	1
PID_SMAD2_3PATHWAY	16	0.354696	1.70943	0.0251572	0.0359137	1
REACTOME_APOPTOTIC_FACTOR_MEDIATED_RESPONSE	16	0.353683	1.7082	0.0315126	0.0360894	1
KEGG_THYROID_CANCER	28	0.273899	1.70608	0.0265655	0.0364521	1
REACTOME_GLUTATHIONE_CONJUGATION	34	0.247829	1.70144	0.0217391	0.0372907	1
KEGG_VEGF_SIGNALING_PATHWAY	75	0.166435	1.70106	0.0283019	0.0373202	1
REACTOME_TP53_REGULATES_TRANSCRIPTION_OF_GENES_INVOLVED_IN_G2_CELL_CYCLE_ARREST	16	0.356185	1.69597	0.0289855	0.0381678	1
REACTOME_DNA_DOUBLE_STRAND_BREAK_REPAIR	125	0.130876	1.69394	0.027451	0.0385012	1
PID_AR_TF_PATHWAY	51	0.205776	1.68984	0.036965	0.0392351	1
PID_WNT_CANONICAL_PATHWAY	20	0.323904	1.68898	0.021097	0.0393608	1
REACTOME_SIGNALLING_TO_RAS	20	0.311732	1.68861	0.0277778	0.0393948	1
REACTOME_REGULATION_OF_IFNA_SIGNALING	18	0.330362	1.68809	0.0365385	0.0394459	1
REACTOME_INTERLEUKIN_3_INTERLEUKIN_5_AND_GM_CSF_SIGNALING	46	0.21063	1.68066	0.0444444	0.0409053	1
REACTOME_NUCLEOTIDE_SALVAGE	20	0.313052	1.68002	0.0378151	0.0409693	1
BIOCARTA_BCELLSURVIVAL_PATHWAY	15	0.360493	1.67825	0.0307692	0.0413051	1
BIOCARTA_HER2_PATHWAY	22	0.292716	1.67575	0.0290698	0.0417257	1
PID_SYNDECAN_2_PATHWAY	32	0.250467	1.67392	0.0267686	0.0420108	1
REACTOME_DOPAMINE_NEUROTRANSMITTER_RELEASE_CYCLE	22	0.293496	1.67119	0.019802	0.0425482	1
REACTOME_CYCLIN_A_B1_B2_ASSOCIATED_EVENTS_DURING_G2_M_TRANSITION	24	0.283867	1.67089	0.0323194	0.0425635	1
REACTOME_LAGGING_STRAND_SYNTHESIS	20	0.311698	1.67008	0.0375494	0.0426913	1
REACTOME_CHAPERONE_MEDIATED_AUTOPHAGY	21	0.308363	1.66799	0.0428016	0.0431355	1
PID_FOXM1_PATHWAY	39	0.227148	1.66481	0.0210084	0.0438448	1
REACTOME_ESTROGEN_DEPENDENT_NUCLEAR_EVENTS_DOWNSTREAM_OF_ESR_MEMBRANE_SIGNALING	24	0.279313	1.66393	0.0286344	0.0440141	1
REACTOME_TP53_REGULATES_TRANSCRIPTION_OF_ADDITIONAL_CELL_CYCLE_GENES_WHOSE_EXACT_ROLE_IN_THE_P53_PATHWAY_REMAIN_UNCERTAIN	20	0.311111	1.66276	0.0300752	0.0441997	1
KEGG_GLYOXYLATE_AND_DICARBOXYLATE_METABOLISM	16	0.346262	1.66207	0.0360721	0.0442852	1
REACTOME_NUCLEOBASE_CATABOLISM	33	0.248723	1.66162	0.0301887	0.0443565	1
REACTOME_DISEASES_OF_METABOLISM	226	0.0968266	1.65892	0.0366795	0.044884	1
REACTOME_BUTYRATE_RESPONSE_FACTOR_1_BRF1_BINDS_AND_DESTABILIZES_MRNA	16	0.345469	1.65804	0.029703	0.0450453	1
REACTOME_N_GLYCAN_ANTENNAE_ELONGATION	15	0.361684	1.65715	0.0424242	0.0451914	1
BIOCARTA_RELA_PATHWAY	15	0.352415	1.65461	0.0261044	0.0456976	1
REACTOME_PURINE_CATABOLISM	17	0.328598	1.65379	0.0265306	0.0458292	1
KEGG_NOTCH_SIGNALING_PATHWAY	47	0.204005	1.65218	0.0384615	0.0461287	1
BIOCARTA_IL1R_PATHWAY	30	0.257838	1.64994	0.0417495	0.0466004	1
REACTOME_CELL_CELL_COMMUNICATION	124	0.125346	1.64427	0.0372549	0.0478354	1
REACTOME_CA2_PATHWAY	62	0.171174	1.64397	0.0278373	0.0478404	1
BIOCARTA_ARF_PATHWAY	16	0.342491	1.64231	0.0425963	0.0481689	1
KEGG_STEROID_BIOSYNTHESIS	16	0.340062	1.64029	0.0325866	0.0485632	1
REACTOME_KINESINS	51	0.19836	1.6394	0.0461216	0.0487142	1
REACTOME_RORA_ACTIVATES_GENE_EXPRESSION	18	0.321177	1.63366	0.0356436	0.050035	1
BIOCARTA_GH_PATHWAY	26	0.264764	1.63247	0.0411765	0.0502464	1
KEGG_MELANOMA	69	0.16934	1.62794	0.0317757	0.0513015	1
REACTOME_DOWNREGULATION_OF_SMAD2_3_SMAD4_TRANSCRIPTIONAL_ACTIVITY	23	0.281027	1.62749	0.0451745	0.0513457	1
REACTOME_TRAF6_MEDIATED_IRF7_ACTIVATION	21	0.295697	1.6233	0.0435644	0.052392	1
BIOCARTA_CALCINEURIN_PATHWAY	18	0.323636	1.61792	0.054326	0.0536712	1
REACTOME_ADP_SIGNALLING_THROUGH_P2Y_PURINOCEPTOR_1	25	0.271757	1.61176	0.0451745	0.0551719	1
REACTOME_PRESYNAPTIC_FUNCTION_OF_KAINATE_RECEPTORS	21	0.292324	1.61152	0.0438095	0.0551624	1
REACTOME_ROS_AND_RNS_PRODUCTION_IN_PHAGOCYTES	35	0.225393	1.61051	0.0406977	0.0553748	1
KEGG_NATURAL_KILLER_CELL_MEDIATED_CYTOTOXICITY	100	0.13862	1.60988	0.0326531	0.0554819	1
KEGG_DNA_REPLICATION	35	0.233214	1.60909	0.0502008	0.0556382	1
REACTOME_RESOLUTION_OF_ABASIC_SITES_AP_SITES	38	0.222905	1.6073	0.0453649	0.0560188	1
REACTOME_N_GLYCAN_ANTENNAE_ELONGATION_IN_THE_MEDIAL_TRANS_GOLGI	25	0.268409	1.60662	0.0380952	0.0561061	1
BIOCARTA_EPO_PATHWAY	19	0.31105	1.60661	0.0433884	0.0560464	1
REACTOME_TELOMERE_MAINTENANCE	42	0.204865	1.60537	0.044898	0.0563401	1
REACTOME_DISEASES_ASSOCIATED_WITH_GLYCOSAMINOGLYCAN_METABOLISM	40	0.214529	1.60258	0.0524194	0.0570577	1
REACTOME_INWARDLY_RECTIFYING_K_CHANNELS	35	0.226572	1.60149	0.0523139	0.0573077	1
BIOCARTA_PGC1A_PATHWAY	15	0.341565	1.59878	0.0381526	0.0579436	1
PID_NFKAPPAB_ATYPICAL_PATHWAY	17	0.327416	1.59796	0.0506823	0.0581306	1
REACTOME_GAP_FILLING_DNA_REPAIR_SYNTHESIS_AND_LIGATION_IN_GG_NER	25	0.262969	1.59193	0.0465587	0.0597458	1
PID_ERBB4_PATHWAY	38	0.216241	1.59007	0.0470588	0.0602154	1
BIOCARTA_PTEN_PATHWAY	17	0.313072	1.58965	0.0541586	0.0602437	1
PID_ATM_PATHWAY	29	0.241113	1.58577	0.0492424	0.0612957	1
REACTOME_GABA_SYNTHESIS_RELEASE_REUPTAKE_AND_DEGRADATION	19	0.305453	1.58381	0.0557769	0.0618696	1
PID_CD40_PATHWAY	30	0.247107	1.581	0.0584795	0.0625859	1
REACTOME_ASSEMBLY_OF_THE_HIV_VIRION	16	0.332731	1.58091	0.0530612	0.062531	1
REACTOME_EXTENSION_OF_TELOMERES	42	0.204865	1.57523	0.0404858	0.0641387	1
REACTOME_ROLE_OF_PHOSPHOLIPIDS_IN_PHAGOCYTOSIS	22	0.282598	1.57432	0.0475207	0.064309	1
KEGG_MELANOGENESIS	96	0.138784	1.57311	0.0476191	0.0645822	1
REACTOME_ABC_TRANSPORTERS_IN_LIPID_HOMEOSTASIS	17	0.311497	1.56777	0.0712831	0.0661772	1
REACTOME_TERMINATION_OF_TRANSLESION_DNA_SYNTHESIS	31	0.23594	1.56598	0.0587084	0.0666556	1
KEGG_RIBOFLAVIN_METABOLISM	15	0.343352	1.56537	0.0376984	0.06675	1
KEGG_PORPHYRIN_AND_CHLOROPHYLL_METABOLISM	27	0.257488	1.56225	0.0576923	0.0676475	1
REACTOME_MISCELLANEOUS_TRANSPORT_AND_BINDING_EVENTS	24	0.260785	1.56136	0.0450098	0.0678423	1
REACTOME_NEGATIVE_REGULATION_OF_FGFR3_SIGNALING	29	0.249671	1.55993	0.058	0.0682284	1
REACTOME_SMOOTH_MUSCLE_CONTRACTION	35	0.221424	1.55815	0.0626151	0.0687419	1
REACTOME_METABOLISM_OF_PORPHYRINS	22	0.274763	1.55661	0.0487329	0.0691287	1
REACTOME_G2_M_DNA_DAMAGE_CHECKPOINT	55	0.183127	1.55048	0.0488798	0.0711066	1
REACTOME_TRISTETRAPROLIN_TTP_ZFP36_BINDS_AND_DESTABILIZES_MRNA	16	0.316469	1.54691	0.0568182	0.0722457	1
PID_TCR_PATHWAY	62	0.164687	1.54691	0.0531496	0.0721709	1
PID_RB_1PATHWAY	64	0.164664	1.54651	0.0609524	0.0722192	1
BIOCARTA_ATM_PATHWAY	17	0.311601	1.53949	0.0575397	0.0745156	1
REACTOME_ADRENALINE_NORADRENALINE_INHIBITS_INSULIN_SECRETION	28	0.244738	1.53878	0.0585938	0.0747067	1
REACTOME_DNA_DAMAGE_TELOMERE_STRESS_INDUCED_SENESCENCE	25	0.255478	1.53444	0.0584795	0.0760666	1
KEGG_NOD_LIKE_RECEPTOR_SIGNALING_PATHWAY	54	0.176826	1.52949	0.0588235	0.0778305	1
REACTOME_MRNA_DECAY_BY_5_TO_3_EXORIBONUCLEASE	15	0.327313	1.52738	0.0554455	0.078477	1
KEGG_GLYCOSYLPHOSPHATIDYLINOSITOL_GPI_ANCHOR_BIOSYNTHESIS	24	0.26166	1.52507	0.056338	0.0792425	1
REACTOME_SIGNALING_BY_HIPPO	20	0.276868	1.52287	0.0637899	0.0799351	1
KEGG_ALANINE_ASPARTATE_AND_GLUTAMATE_METABOLISM	29	0.23598	1.52049	0.0732673	0.0806631	1
REACTOME_MYOGENESIS	29	0.236015	1.51991	0.0526316	0.0808028	1
REACTOME_CD28_CO_STIMULATION	33	0.224904	1.5192	0.0603622	0.0809727	1
BIOCARTA_P53HYPOXIA_PATHWAY	19	0.288255	1.51841	0.0591837	0.0811373	1
REACTOME_SIGNALING_BY_PDGF	58	0.171791	1.51665	0.078629	0.0817169	1
KEGG_GLYCOSPHINGOLIPID_BIOSYNTHESIS_LACTO_AND_NEOLACTO_SERIES	23	0.260569	1.5157	0.0601202	0.0820006	1
REACTOME_METABOLISM_OF_FOLATE_AND_PTERINES	16	0.320125	1.51518	0.074	0.0821357	1
BIOCARTA_CTCF_PATHWAY	23	0.265724	1.51439	0.0647773	0.082281	1
REACTOME_G_PROTEIN_ACTIVATION	28	0.244738	1.51275	0.0687623	0.0827164	1
REACTOME_MITOCHONDRIAL_FATTY_ACID_BETA_OXIDATION	35	0.215301	1.50956	0.0708661	0.0838826	1
KEGG_LYSINE_DEGRADATION	42	0.19738	1.50785	0.0523139	0.0844466	1
BIOCARTA_NFKB_PATHWAY	21	0.276247	1.50215	0.0642722	0.0865558	1
PID_SMAD2_3NUCLEAR_PATHWAY	81	0.141248	1.50187	0.0584677	0.0865866	1
REACTOME_REGULATION_OF_TP53_ACTIVITY_THROUGH_METHYLATION	17	0.297596	1.49866	0.0574949	0.0877039	1
REACTOME_RECOGNITION_OF_DNA_DAMAGE_BY_PCNA_CONTAINING_REPLICATION_COMPLEX	30	0.228393	1.49521	0.0860656	0.0889208	1
REACTOME_SYNTHESIS_OF_VERY_LONG_CHAIN_FATTY_ACYL_COAS	24	0.252139	1.4931	0.0684105	0.0896987	1
KEGG_VASCULAR_SMOOTH_MUSCLE_CONTRACTION	106	0.125381	1.49287	0.0731707	0.0896943	1
REACTOME_INTEGRIN_SIGNALING	27	0.240987	1.48795	0.075	0.0915652	1
REACTOME_CARBOXYTERMINAL_POST_TRANSLATIONAL_MODIFICATIONS_OF_TUBULIN	36	0.213613	1.48584	0.0791075	0.0923242	1
REACTOME_CASPASE_ACTIVATION_VIA_EXTRINSIC_APOPTOTIC_SIGNALLING_PATHWAY	24	0.251513	1.48194	0.079918	0.093911	1
SA_TRKA_RECEPTOR	17	0.297771	1.47708	0.0877193	0.0958923	1
PID_TCR_CALCIUM_PATHWAY	25	0.246715	1.47664	0.0828516	0.0959825	1
REACTOME_ZINC_TRANSPORTERS	17	0.30294	1.47355	0.0872865	0.0971983	1
REACTOME_SEROTONIN_NEUROTRANSMITTER_RELEASE_CYCLE	17	0.290754	1.46888	0.0831643	0.0990727	1
REACTOME_NOTCH_HLH_TRANSCRIPTION_PATHWAY	28	0.228221	1.46581	0.0811359	0.100255	1
KEGG_BLADDER_CANCER	39	0.196756	1.46278	0.0808081	0.101488	1
REACTOME_TELOMERE_C_STRAND_LAGGING_STRAND_SYNTHESIS	27	0.239486	1.45961	0.078	0.102749	1
REACTOME_CELL_SURFACE_INTERACTIONS_AT_THE_VASCULAR_WALL	116	0.116448	1.45165	0.0806754	0.106069	1
PID_HIV_NEF_PATHWAY	34	0.207441	1.44902	0.0785855	0.107223	1
PID_INSULIN_GLUCOSE_PATHWAY	23	0.255112	1.44128	0.0812379	0.110644	1
REACTOME_G_ALPHA_I_SIGNALLING_EVENTS	356	0.0664263	1.43933	0.0956175	0.111407	1
REACTOME_FGFR1_MUTANT_RECEPTOR_ACTIVATION	31	0.218156	1.43919	0.0899582	0.111372	1
REACTOME_FOXO_MEDIATED_TRANSCRIPTION_OF_OXIDATIVE_STRESS_METABOLIC_AND_NEURONAL_GENES	29	0.223995	1.43722	0.0910853	0.112167	1
REACTOME_GAB1_SIGNALOSOME	17	0.286981	1.43671	0.108216	0.112305	1
REACTOME_ADHERENS_JUNCTIONS_INTERACTIONS	33	0.208906	1.4359	0.0871287	0.11259	1
REACTOME_RAF_INDEPENDENT_MAPK1_3_ACTIVATION	21	0.259519	1.43438	0.108216	0.113153	1
REACTOME_PLASMA_LIPOPROTEIN_CLEARANCE	32	0.212324	1.43343	0.0892495	0.113499	1
REACTOME_PURINERGIC_SIGNALING_IN_LEISHMANIASIS_INFECTION	23	0.248054	1.43275	0.0885312	0.113773	1
REACTOME_EGR2_AND_SOX10_MEDIATED_INITIATION_OF_SCHWANN_CELL_MYELINATION	27	0.237871	1.42715	0.0974026	0.116301	1
REACTOME_TELOMERE_EXTENSION_BY_TELOMERASE	15	0.295649	1.42015	0.0869565	0.119714	1
BIOCARTA_TNFR2_PATHWAY	16	0.303541	1.41821	0.0878906	0.120605	1
REACTOME_GLUCAGON_TYPE_LIGAND_RECEPTORS	33	0.210109	1.41669	0.088	0.121232	1
PID_GLYPICAN_1PATHWAY	27	0.2302	1.40907	0.101761	0.125074	1
REACTOME_POLYMERASE_SWITCHING_ON_THE_C_STRAND_OF_THE_TELOMERE	17	0.285165	1.40816	0.0955414	0.125429	1
REACTOME_DOWNSTREAM_SIGNALING_OF_ACTIVATED_FGFR3	25	0.23996	1.40762	0.120229	0.125585	1
REACTOME_RESPONSE_OF_MTB_TO_PHAGOCYTOSIS	21	0.256746	1.4058	0.116279	0.126411	1
PID_FRA_PATHWAY	35	0.19918	1.40371	0.102515	0.127441	1
PID_CD8_TCR_PATHWAY	51	0.165239	1.40246	0.105769	0.127948	1
PID_HIF2PATHWAY	32	0.206406	1.40081	0.116959	0.128775	1
PID_P38_MK2_PATHWAY	21	0.250645	1.40026	0.102041	0.128985	1
PID_A6B1_A6B4_INTEGRIN_PATHWAY	46	0.179351	1.39845	0.125969	0.129863	1
REACTOME_TRANSLESION_SYNTHESIS_BY_POLH	18	0.271782	1.39519	0.121704	0.131499	1
PID_AMB2_NEUTROPHILS_PATHWAY	39	0.192273	1.38839	0.108481	0.135053	1
KEGG_OLFACTORY_TRANSDUCTION	27	0.223005	1.38098	0.114286	0.139103	1
REACTOME_GPVI_MEDIATED_ACTIVATION_CASCADE	34	0.199367	1.38054	0.128631	0.139244	1
KEGG_SELENOAMINO_ACID_METABOLISM	23	0.240714	1.37603	0.130178	0.141699	1
REACTOME_DEPOSITION_OF_NEW_CENPA_CONTAINING_NUCLEOSOMES_AT_THE_CENTROMERE	25	0.235427	1.37577	0.115914	0.141704	1
REACTOME_RIPK1_MEDIATED_REGULATED_NECROSIS	18	0.277108	1.37574	0.127119	0.141586	1
PID_BARD1_PATHWAY	27	0.22005	1.37385	0.106838	0.142503	1
REACTOME_GLYOXYLATE_METABOLISM_AND_GLYCINE_DEGRADATION	31	0.204548	1.36592	0.120079	0.146952	1
REACTOME_HOMOLOGY_DIRECTED_REPAIR	98	0.117888	1.36411	0.105788	0.147775	1
REACTOME_KERATAN_SULFATE_KERATIN_METABOLISM	33	0.197352	1.36075	0.121951	0.149599	1
BIOCARTA_TFF_PATHWAY	22	0.245341	1.35932	0.146586	0.150342	1
REACTOME_TRANSCRIPTIONAL_REGULATION_BY_E2F6	34	0.192709	1.35655	0.12549	0.151837	1
PID_DNA_PK_PATHWAY	16	0.282456	1.35067	0.142578	0.155249	1
REACTOME_POLO_LIKE_KINASE_MEDIATED_EVENTS	16	0.283765	1.34269	0.141079	0.160143	1
PID_TAP63_PATHWAY	52	0.151012	1.33406	0.122371	0.165327	1
REACTOME_NEGATIVE_REGULATION_OF_FGFR4_SIGNALING	30	0.206205	1.33388	0.143451	0.165291	1
KEGG_GLYCEROLIPID_METABOLISM	47	0.16663	1.3338	0.147573	0.165186	1
KEGG_BETA_ALANINE_METABOLISM	22	0.238368	1.33328	0.144231	0.16536	1
REACTOME_FOXO_MEDIATED_TRANSCRIPTION	63	0.142448	1.32976	0.133981	0.167506	1
REACTOME_METABOLISM_OF_STEROIDS	137	0.095716	1.32905	0.128257	0.167807	1
PID_E2F_PATHWAY	69	0.139131	1.3244	0.148438	0.170748	1
BIOCARTA_PITX2_PATHWAY	16	0.278752	1.32022	0.1409	0.173334	1
KEGG_BUTANOATE_METABOLISM	32	0.1958	1.31964	0.140952	0.173514	1
REACTOME_TRANSPORT_OF_CONNEXONS_TO_THE_PLASMA_MEMBRANE	15	0.28434	1.31884	0.156504	0.173965	1
KEGG_MISMATCH_REPAIR	22	0.235984	1.3186	0.148	0.173945	1
REACTOME_TRANSCRIPTION_OF_E2F_TARGETS_UNDER_NEGATIVE_CONTROL_BY_P107_RBL1_AND_P130_RBL2_IN_COMPLEX_WITH_HDAC1	16	0.27519	1.31527	0.149701	0.176027	1
PID_LYMPH_ANGIOGENESIS_PATHWAY	25	0.220941	1.31487	0.16875	0.176124	1
REACTOME_PEROXISOMAL_PROTEIN_IMPORT	61	0.146583	1.31075	0.158482	0.178803	1
REACTOME_RUNX1_REGULATES_GENES_INVOLVED_IN_MEGAKARYOCYTE_DIFFERENTIATION_AND_PLATELET_FUNCTION	38	0.179083	1.31066	0.134122	0.178689	1
REACTOME_PROCESSING_OF_DNA_DOUBLE_STRAND_BREAK_ENDS	59	0.145772	1.30183	0.15458	0.184673	1
REACTOME_TRANSLESION_SYNTHESIS_BY_POLK	17	0.265229	1.29737	0.162745	0.187528	1
PID_ALK1_PATHWAY	26	0.20751	1.29363	0.137295	0.190094	1
PID_CMYB_PATHWAY	80	0.123587	1.2929	0.175732	0.190441	1
REACTOME_REGULATION_OF_KIT_SIGNALING	15	0.282697	1.29262	0.186613	0.190454	1
KEGG_DORSO_VENTRAL_AXIS_FORMATION	22	0.232906	1.29237	0.175097	0.190449	1
PID_BMP_PATHWAY	41	0.170934	1.29054	0.170124	0.191574	1
KEGG_O_GLYCAN_BIOSYNTHESIS	28	0.20055	1.28833	0.156556	0.192943	1
REACTOME_RUNX2_REGULATES_OSTEOBLAST_DIFFERENTIATION	23	0.225496	1.28252	0.181467	0.197327	1
REACTOME_PHASE_0_RAPID_DEPOLARISATION	42	0.167038	1.28192	0.156313	0.19753	1
PID_RXR_VDR_PATHWAY	26	0.209669	1.27428	0.166998	0.203166	1
REACTOME_ACETYLCHOLINE_NEUROTRANSMITTER_RELEASE_CYCLE	16	0.264987	1.2719	0.187377	0.204821	1
KEGG_GALACTOSE_METABOLISM	25	0.213186	1.27067	0.186	0.205657	1
PID_CD8_TCR_DOWNSTREAM_PATHWAY	53	0.148055	1.26872	0.193798	0.206885	1
KEGG_ABC_TRANSPORTERS	40	0.173969	1.26569	0.1875	0.209034	1
KEGG_CYSTEINE_AND_METHIONINE_METABOLISM	33	0.18174	1.26196	0.180328	0.211604	1
REACTOME_GROWTH_HORMONE_RECEPTOR_SIGNALING	21	0.229873	1.26019	0.171429	0.212815	1
REACTOME_TRANSCRIPTION_OF_E2F_TARGETS_UNDER_NEGATIVE_CONTROL_BY_DREAM_COMPLEX	19	0.242304	1.25938	0.178295	0.213279	1
REACTOME_DISEASES_OF_CARBOHYDRATE_METABOLISM	31	0.189919	1.25706	0.186	0.214891	1
REACTOME_DAP12_SIGNALING	28	0.199224	1.25325	0.191781	0.217699	1
REACTOME_NEGATIVE_REGULATION_OF_FGFR1_SIGNALING	32	0.18536	1.25244	0.194389	0.218188	1
REACTOME_INFLAMMASOMES	18	0.24558	1.24373	0.1875	0.224889	1
PID_HES_HEY_PATHWAY	48	0.149701	1.24102	0.183752	0.226954	1
SIG_PIP3_SIGNALING_IN_B_LYMPHOCYTES	35	0.175096	1.23978	0.196154	0.227714	1
REACTOME_PROCESSIVE_SYNTHESIS_ON_THE_LAGGING_STRAND	15	0.261594	1.23683	0.184	0.229903	1
PID_THROMBIN_PAR4_PATHWAY	15	0.263508	1.23595	0.194175	0.230421	1
PID_AP1_PATHWAY	63	0.133644	1.23225	0.211881	0.233343	1
KEGG_CELL_ADHESION_MOLECULES_CAMS	106	0.10177	1.22781	0.202756	0.236939	1
KEGG_ALDOSTERONE_REGULATED_SODIUM_REABSORPTION	41	0.162909	1.2224	0.199187	0.241347	1
REACTOME_DEFECTS_IN_VITAMIN_AND_COFACTOR_METABOLISM	19	0.22637	1.22203	0.208333	0.241447	1
REACTOME_INFECTION_WITH_MYCOBACTERIUM_TUBERCULOSIS	25	0.210845	1.21629	0.237721	0.246329	1
Negatively enriched in RCAS-CRE
NAME	SIZE	ES	NES	NOM p-val	FDR q-val	FWER p-val
REACTOME_KERATINIZATION	137	-0.430756	-5.92739	0	0	0
REACTOME_FORMATION_OF_THE_CORNIFIED_ENVELOPE	105	-0.401015	-4.83857	0	0	0
KEGG_MATURITY_ONSET_DIABETES_OF_THE_YOUNG	24	-0.634397	-3.74239	0	0	0
KEGG_CYTOKINE_CYTOKINE_RECEPTOR_INTERACTION	223	-0.175783	-3.11497	0	7.37135e-05	0.001
REACTOME_FERTILIZATION	24	-0.520825	-3.10289	0	5.89708e-05	0.001
NABA_SECRETED_FACTORS	289	-0.157404	-3.02543	0	9.99086e-05	0.002
REACTOME_REGULATION_OF_BETA_CELL_DEVELOPMENT	41	-0.400711	-2.96475	0	0.000127875	0.003
PID_RHODOPSIN_PATHWAY	22	-0.513564	-2.91046	0	0.000186388	0.005
NABA_COLLAGENS	43	-0.364833	-2.84796	0	0.000232854	0.007
NABA_CORE_MATRISOME	253	-0.155352	-2.82879	0	0.000240338	0.008
REACTOME_COLLAGEN_CHAIN_TRIMERIZATION	43	-0.364833	-2.80172	0	0.000299483	0.011
KEGG_INTESTINAL_IMMUNE_NETWORK_FOR_IGA_PRODUCTION	31	-0.420557	-2.78165	0	0.00032298	0.013
REACTOME_REGULATION_OF_GENE_EXPRESSION_IN_BETA_CELLS	20	-0.51751	-2.73036	0	0.000481934	0.021
KEGG_HEMATOPOIETIC_CELL_LINEAGE	66	-0.278719	-2.7183	0	0.000489001	0.023
REACTOME_IMMUNOREGULATORY_INTERACTIONS_BETWEEN_A_LYMPHOID_AND_A_NON_LYMPHOID_CELL	82	-0.246007	-2.61175	0	0.00120222	0.06
BIOCARTA_INTRINSIC_PATHWAY	23	-0.457189	-2.59516	0	0.00125784	0.067
REACTOME_THE_CANONICAL_RETINOID_CYCLE_IN_RODS_TWILIGHT_VISION	22	-0.440198	-2.48204	0	0.00247413	0.137
KEGG_AUTOIMMUNE_THYROID_DISEASE	22	-0.43304	-2.46813	0	0.00260031	0.151
PID_CONE_PATHWAY	21	-0.450711	-2.4471	0	0.00274475	0.165
NABA_ECM_REGULATORS	211	-0.143187	-2.43927	0	0.00285914	0.18
REACTOME_TRANSCRIPTIONAL_REGULATION_OF_PLURIPOTENT_STEM_CELLS	31	-0.361988	-2.42409	0	0.00301931	0.196
REACTOME_GPCR_LIGAND_BINDING	407	-0.102617	-2.41282	0	0.00313502	0.208
REACTOME_STIMULI_SENSING_CHANNELS	101	-0.197846	-2.37549	0.00209205	0.00376307	0.259
REACTOME_VISUAL_PHOTOTRANSDUCTION	93	-0.208455	-2.34878	0.0020202	0.00452761	0.317
REACTOME_COLLAGEN_BIOSYNTHESIS_AND_MODIFYING_ENZYMES	66	-0.247316	-2.33545	0	0.00475807	0.339
REACTOME_REPRODUCTION	80	-0.215609	-2.30407	0	0.00564682	0.397
REACTOME_ASSEMBLY_OF_COLLAGEN_FIBRILS_AND_OTHER_MULTIMERIC_STRUCTURES	60	-0.25558	-2.29582	0.00193798	0.00579649	0.415
REACTOME_COLLAGEN_DEGRADATION	63	-0.244134	-2.27617	0	0.00647585	0.458
REACTOME_STRIATED_MUSCLE_CONTRACTION	36	-0.317903	-2.27235	0.00206612	0.00648488	0.467
KEGG_RETINOL_METABOLISM	31	-0.341642	-2.25547	0.00392157	0.00696361	0.51
REACTOME_TNFS_BIND_THEIR_PHYSIOLOGICAL_RECEPTORS	27	-0.358319	-2.21507	0.00184162	0.0089408	0.612
REACTOME_METABOLISM_OF_AMINE_DERIVED_HORMONES	18	-0.427992	-2.21197	0	0.00879904	0.618
REACTOME_CLASS_A_1_RHODOPSIN_LIKE_RECEPTORS	302	-0.110381	-2.20459	0	0.00893471	0.636
KEGG_BASAL_CELL_CARCINOMA	54	-0.251697	-2.19531	0	0.00936559	0.663
REACTOME_ANTIMICROBIAL_PEPTIDES	44	-0.271332	-2.13364	0.00397614	0.0138033	0.795
REACTOME_ACYL_CHAIN_REMODELLING_OF_PI	16	-0.420107	-2.09839	0.00200401	0.0168887	0.874
REACTOME_COMPLEMENT_CASCADE	43	-0.268666	-2.09611	0	0.0166636	0.874
KEGG_STEROID_HORMONE_BIOSYNTHESIS	31	-0.323601	-2.09587	0.002	0.0162406	0.874
REACTOME_DECTIN_2_FAMILY	16	-0.435723	-2.08951	0	0.0165323	0.885
BIOCARTA_AMI_PATHWAY	19	-0.406789	-2.07796	0.00190114	0.0172994	0.903
REACTOME_ION_CHANNEL_TRANSPORT	177	-0.133909	-2.07347	0.00420168	0.0174167	0.907
REACTOME_DEGRADATION_OF_THE_EXTRACELLULAR_MATRIX	133	-0.153552	-2.05329	0.00601202	0.0191571	0.929
REACTOME_TRP_CHANNELS	28	-0.311199	-2.00287	0.00409836	0.0252782	0.973
KEGG_LINOLEIC_ACID_METABOLISM	19	-0.380022	-1.99463	0.0039604	0.0259619	0.975
REACTOME_COLLAGEN_FORMATION	88	-0.179109	-1.9845	0.00963391	0.0268027	0.984
KEGG_PRIMARY_IMMUNODEFICIENCY	34	-0.28019	-1.97883	0	0.0270847	0.986
NABA_ECM_GLYCOPROTEINS	175	-0.125588	-1.9591	0.00606061	0.0297721	0.996
REACTOME_FORMATION_OF_FIBRIN_CLOT_CLOTTING_CASCADE	38	-0.27068	-1.95001	0.0122449	0.0308232	0.998
KEGG_COMPLEMENT_AND_COAGULATION_CASCADES	60	-0.210451	-1.94193	0.0040568	0.0317542	0.999
REACTOME_PEPTIDE_LIGAND_BINDING_RECEPTORS	179	-0.121494	-1.91768	0.00990099	0.0357698	0.999
BIOCARTA_EICOSANOID_PATHWAY	21	-0.343187	-1.91737	0.00617284	0.0351321	0.999
REACTOME_PIWI_INTERACTING_RNA_PIRNA_BIOGENESIS	29	-0.298311	-1.91458	0.00845666	0.0349502	0.999
REACTOME_EXTRACELLULAR_MATRIX_ORGANIZATION	289	-0.0979616	-1.90619	0.002	0.0359154	1
REACTOME_INTRINSIC_PATHWAY_OF_FIBRIN_CLOT_FORMATION	23	-0.326619	-1.89841	0.00811359	0.0370028	1
REACTOME_PLASMA_LIPOPROTEIN_REMODELING	30	-0.286795	-1.8789	0.0140845	0.0404116	1
REACTOME_THE_PHOTOTRANSDUCTION_CASCADE	32	-0.274815	-1.85375	0.00587084	0.0456737	1
REACTOME_CLASS_B_2_SECRETIN_FAMILY_RECEPTORS	91	-0.16568	-1.84995	0.0100402	0.0457975	1
PID_HEDGEHOG_2PATHWAY	22	-0.325573	-1.84994	0.0117188	0.045013	1
REACTOME_ACYL_CHAIN_REMODELLING_OF_PG	18	-0.368698	-1.84803	0.0117188	0.0446829	1
KEGG_HEDGEHOG_SIGNALING_PATHWAY	54	-0.214569	-1.84201	0.0122699	0.0454958	1
REACTOME_SLC_MEDIATED_TRANSMEMBRANE_TRANSPORT	237	-0.0996334	-1.82913	0.00998004	0.0478832	1
PID_HNF3B_PATHWAY	44	-0.227371	-1.82113	0.0173077	0.0491908	1
REACTOME_INTEGRIN_CELL_SURFACE_INTERACTIONS	84	-0.165376	-1.80488	0.0142566	0.0527276	1
REACTOME_TERMINATION_OF_O_GLYCAN_BIOSYNTHESIS	16	-0.373178	-1.7768	0.0140281	0.0603332	1
NABA_PROTEOGLYCANS	35	-0.249173	-1.77441	0.0242424	0.060212	1
KEGG_ALLOGRAFT_REJECTION	15	-0.373481	-1.7652	0.0160321	0.0620562	1
KEGG_TYROSINE_METABOLISM	35	-0.252608	-1.7587	0.0102249	0.0632161	1
REACTOME_ACYL_CHAIN_REMODELLING_OF_PC	26	-0.28071	-1.7164	0.023301	0.0778389	1
REACTOME_CHEMOKINE_RECEPTORS_BIND_CHEMOKINES	49	-0.204774	-1.69683	0.0314961	0.0847796	1
BIOCARTA_CTLA4_PATHWAY	15	-0.360637	-1.68985	0.0306513	0.086711	1
BIOCARTA_NUCLEARRS_PATHWAY	28	-0.263884	-1.68345	0.024948	0.0880429	1
PID_SYNDECAN_1_PATHWAY	45	-0.214172	-1.67186	0.0354331	0.0920901	1
REACTOME_RA_BIOSYNTHESIS_PATHWAY	19	-0.3259	-1.67145	0.0402414	0.0910589	1
REACTOME_ANCHORING_FIBRIL_FORMATION	15	-0.358931	-1.66629	0.028169	0.0923007	1
KEGG_ARRHYTHMOGENIC_RIGHT_VENTRICULAR_CARDIOMYOPATHY_ARVC	74	-0.166201	-1.66128	0.0310559	0.0931673	1
REACTOME_TIGHT_JUNCTION_INTERACTIONS	29	-0.256852	-1.65969	0.0337302	0.092629	1
REACTOME_CROSSLINKING_OF_COLLAGEN_FIBRILS	18	-0.323689	-1.64403	0.0433884	0.0986911	1
REACTOME_ACYL_CHAIN_REMODELLING_OF_PS	21	-0.297251	-1.64116	0.0392927	0.0988158	1
REACTOME_ACYL_CHAIN_REMODELLING_OF_PE	24	-0.274267	-1.61027	0.0351967	0.113678	1
REACTOME_CYTOCHROME_P450_ARRANGED_BY_SUBSTRATE_TYPE	38	-0.214118	-1.60585	0.0381526	0.114592	1
REACTOME_INCRETIN_SYNTHESIS_SECRETION_AND_INACTIVATION	23	-0.280932	-1.59675	0.0588235	0.118326	1
BIOCARTA_TOB1_PATHWAY	18	-0.314812	-1.59641	0.0381526	0.117103	1
REACTOME_METABOLISM_OF_STEROID_HORMONES	30	-0.239746	-1.56904	0.0506073	0.131383	1
REACTOME_DIGESTION	15	-0.330237	-1.55704	0.054878	0.136994	1
REACTOME_SYNTHESIS_SECRETION_AND_INACTIVATION_OF_GLUCAGON_LIKE_PEPTIDE_1_GLP_1	20	-0.290277	-1.54266	0.0485437	0.14457	1
REACTOME_TRANSPORT_OF_BILE_SALTS_AND_ORGANIC_ACIDS_METAL_IONS_AND_AMINE_COMPOUNDS	84	-0.142555	-1.539	0.0645161	0.145248	1
KEGG_GRAFT_VERSUS_HOST_DISEASE	15	-0.337657	-1.53797	0.0766129	0.144231	1
REACTOME_METABOLIC_DISORDERS_OF_BIOLOGICAL_OXIDATION_ENZYMES	32	-0.228393	-1.5346	0.0625	0.144843	1
REACTOME_ASSEMBLY_OF_ACTIVE_LPL_AND_LIPC_LIPASE_COMPLEXES	19	-0.295432	-1.53454	0.0727969	0.143236	1
NABA_ECM_AFFILIATED	130	-0.115967	-1.53373	0.0785124	0.142209	1
REACTOME_DIGESTION_AND_ABSORPTION	20	-0.283205	-1.52741	0.0671937	0.144717	1
REACTOME_MUSCLE_CONTRACTION	199	-0.0921491	-1.52435	0.0701031	0.14519	1
REACTOME_CELLULAR_HEXOSE_TRANSPORT	17	-0.309928	-1.50901	0.0803922	0.1538	1
REACTOME_REGULATION_OF_GENE_EXPRESSION_IN_LATE_STAGE_BRANCHING_MORPHOGENESIS_PANCREATIC_BUD_PRECURSOR_CELLS	16	-0.306644	-1.50038	0.0736434	0.158059	1
REACTOME_FGFR2_LIGAND_BINDING_AND_ACTIVATION	19	-0.284508	-1.49604	0.071291	0.159416	1
REACTOME_ARACHIDONIC_ACID_METABOLISM	44	-0.187571	-1.48969	0.0587045	0.161988	1
KEGG_HYPERTROPHIC_CARDIOMYOPATHY_HCM	83	-0.140706	-1.48765	0.0669371	0.161624	1
REACTOME_ACTIVATION_OF_MATRIX_METALLOPROTEINASES	28	-0.235492	-1.48274	0.0777096	0.163665	1
KEGG_METABOLISM_OF_XENOBIOTICS_BY_CYTOCHROME_P450	38	-0.200045	-1.47705	0.0711382	0.166147	1
REACTOME_CARDIAC_CONDUCTION	134	-0.108793	-1.47069	0.0787402	0.16909	1
KEGG_ECM_RECEPTOR_INTERACTION	83	-0.133575	-1.44908	0.0942308	0.1838	1
BIOCARTA_NO2IL12_PATHWAY	15	-0.30677	-1.43799	0.0936255	0.190698	1
REACTOME_RESOLUTION_OF_D_LOOP_STRUCTURES_THROUGH_SYNTHESIS_DEPENDENT_STRAND_ANNEALING_SDSA	25	-0.236946	-1.42835	0.0877551	0.196631	1
KEGG_DRUG_METABOLISM_CYTOCHROME_P450	41	-0.19107	-1.42338	0.10119	0.198946	1
REACTOME_ACTIVATION_OF_THE_PRE_REPLICATIVE_COMPLEX	32	-0.211303	-1.42064	0.0984252	0.199339	1
REACTOME_COMMON_PATHWAY_OF_FIBRIN_CLOT_FORMATION	21	-0.25129	-1.38556	0.128968	0.228128	1
REACTOME_ELASTIC_FIBRE_FORMATION	43	-0.176463	-1.37178	0.136364	0.238974	1
NABA_BASEMENT_MEMBRANES	39	-0.185684	-1.3669	0.132353	0.241568	1

## Sheet: cgp c2
Positively enriched in RCAS-CRE
NAME	SIZE	ES	NES	NOM p-val	FDR q-val	FWER p-val
STARK_PREFRONTAL_CORTEX_22Q11_DELETION_DN	469	0.473519	11.7802	0	0	0
MILI_PSEUDOPODIA_HAPTOTAXIS_UP	465	0.404313	9.94874	0	0	0
SHEN_SMARCA2_TARGETS_UP	399	0.427449	9.88202	0	0	0
ENK_UV_RESPONSE_KERATINOCYTE_DN	446	0.350579	8.62416	0	0	0
WANG_TUMOR_INVASIVENESS_UP	361	0.378625	8.31375	0	0	0
GARY_CD5_TARGETS_DN	402	0.351436	8.14798	0	0	0
MOOTHA_HUMAN_MITODB_6_2002	394	0.352368	8.14581	0	0	0
MOOTHA_PGC	388	0.356745	8.11606	0	0	0
MOOTHA_MITOCHONDRIA	406	0.345226	8.07512	0	0	0
SCHAEFFER_PROSTATE_DEVELOPMENT_6HR_DN	424	0.327342	7.82383	0	0	0
ONKEN_UVEAL_MELANOMA_DN	483	0.311426	7.81829	0	0	0
HSIAO_HOUSEKEEPING_GENES	357	0.362293	7.75115	0	0	0
BORCZUK_MALIGNANT_MESOTHELIOMA_UP	283	0.399639	7.69484	0	0	0
REN_ALVEOLAR_RHABDOMYOSARCOMA_DN	398	0.329226	7.51314	0	0	0
GRYDER_PAX3FOXO1_TOP_ENHANCERS	414	0.321503	7.41953	0	0	0
MONNIER_POSTRADIATION_TUMOR_ESCAPE_UP	374	0.324069	7.23177	0	0	0
GRYDER_PAX3FOXO1_ENHANCERS_KO_DOWN	404	0.309172	7.22492	0	0	0
STEIN_ESRRA_TARGETS	465	0.289823	7.09121	0	0	0
YOSHIMURA_MAPK8_TARGETS_DN	338	0.330797	6.99467	0	0	0
DACOSTA_UV_RESPONSE_VIA_ERCC3_COMMON_DN	431	0.295574	6.95526	0	0	0
SPIELMAN_LYMPHOBLAST_EUROPEAN_VS_ASIAN_UP	445	0.287134	6.95043	0	0	0
WANG_LMO4_TARGETS_DN	321	0.335908	6.89774	0	0	0
MARTORIATI_MDM4_TARGETS_FETAL_LIVER_DN	479	0.274917	6.88856	0	0	0
FLECHNER_BIOPSY_KIDNEY_TRANSPLANT_REJECTED_VS_OK_DN	500	0.270327	6.83825	0	0	0
YAO_TEMPORAL_RESPONSE_TO_PROGESTERONE_CLUSTER_17	174	0.440465	6.65824	0	0	0
WONG_MITOCHONDRIA_GENE_MODULE	199	0.404282	6.63915	0	0	0
OISHI_CHOLANGIOMA_STEM_CELL_LIKE_UP	287	0.334858	6.60813	0	0	0
RHEIN_ALL_GLUCOCORTICOID_THERAPY_DN	342	0.301315	6.51894	0	0	0
BLALOCK_ALZHEIMERS_DISEASE_INCIPIENT_DN	153	0.449971	6.48794	0	0	0
STEIN_ESRRA_TARGETS_UP	343	0.301832	6.48002	0	0	0
BAELDE_DIABETIC_NEPHROPATHY_DN	405	0.278562	6.45544	0	0	0
MARTINEZ_RESPONSE_TO_TRABECTEDIN_DN	250	0.351392	6.2945	0	0	0
GRADE_COLON_AND_RECTAL_CANCER_UP	268	0.327782	6.27116	0	0	0
KIM_ALL_DISORDERS_DURATION_CORR_DN	138	0.451513	6.26497	0	0	0
IVANOVA_HEMATOPOIESIS_EARLY_PROGENITOR	397	0.276748	6.25769	0	0	0
YAO_TEMPORAL_RESPONSE_TO_PROGESTERONE_CLUSTER_13	158	0.433278	6.24715	0	0	0
RICKMAN_METASTASIS_UP	295	0.316864	6.2343	0	0	0
LU_AGING_BRAIN_DN	146	0.44341	6.2267	0	0	0
ZHANG_BREAST_CANCER_PROGENITORS_UP	389	0.275661	6.22506	0	0	0
SENESE_HDAC3_TARGETS_UP	434	0.256323	6.16764	0	0	0
RAMALHO_STEMNESS_UP	177	0.399721	6.14458	0	0	0
MILI_PSEUDOPODIA_CHEMOTAXIS_DN	403	0.265562	6.10331	0	0	0
ALONSO_METASTASIS_UP	170	0.396691	6.09708	0	0	0
LIU_SOX4_TARGETS_DN	288	0.30184	6.03984	0	0	0
OSMAN_BLADDER_CANCER_DN	340	0.281578	6.02735	0	0	0
CHARAFE_BREAST_CANCER_LUMINAL_VS_MESENCHYMAL_DN	431	0.254791	6.01224	0	0	0
IVANOVA_HEMATOPOIESIS_LATE_PROGENITOR	460	0.244321	6.00259	0	0	0
CREIGHTON_ENDOCRINE_THERAPY_RESISTANCE_5	431	0.246531	6.0014	0	0	0
WEST_ADRENOCORTICAL_TUMOR_UP	277	0.309023	5.96945	0	0	0
WONG_EMBRYONIC_STEM_CELL_CORE	320	0.289392	5.95719	0	0	0
OSMAN_BLADDER_CANCER_UP	365	0.275434	5.90048	0	0	0
MIKKELSEN_NPC_ICP_WITH_H3K4ME3	393	0.254848	5.89928	0	0	0
GARY_CD5_TARGETS_UP	425	0.246658	5.87782	0	0	0
GABRIELY_MIR21_TARGETS	270	0.308311	5.85896	0	0	0
BERENJENO_TRANSFORMED_BY_RHOA_DN	369	0.256417	5.84304	0	0	0
YAO_TEMPORAL_RESPONSE_TO_PROGESTERONE_CLUSTER_14	136	0.423793	5.81412	0	0	0
WANG_TUMOR_INVASIVENESS_DN	197	0.350917	5.80194	0	0	0
SENESE_HDAC1_TARGETS_UP	397	0.250063	5.77047	0	0	0
BROWNE_HCMV_INFECTION_20HR_UP	207	0.327913	5.74616	0	0	0
DACOSTA_UV_RESPONSE_VIA_ERCC3_UP	282	0.296839	5.70614	0	0	0
STARK_PREFRONTAL_CORTEX_22Q11_DELETION_UP	186	0.354622	5.65038	0	0	0
WELCSH_BRCA1_TARGETS_UP	180	0.362158	5.64628	0	0	0
JOHNSTONE_PARVB_TARGETS_2_DN	306	0.28242	5.64597	0	0	0
AGUIRRE_PANCREATIC_CANCER_COPY_NUMBER_UP	265	0.296115	5.57131	0	0	0
SCHLOSSER_MYC_TARGETS_REPRESSED_BY_SERUM	139	0.405557	5.54142	0	0	0
BOYAULT_LIVER_CANCER_SUBCLASS_G3_UP	181	0.36156	5.54052	0	0	0
LINSLEY_MIR16_TARGETS	197	0.336314	5.53022	0	0	0
CHIANG_LIVER_CANCER_SUBCLASS_UNANNOTATED_DN	178	0.352572	5.52022	0	0	0
DEBIASI_APOPTOSIS_BY_REOVIRUS_INFECTION_UP	259	0.294183	5.50166	0	0	0
VERHAAK_GLIOBLASTOMA_PRONEURAL	159	0.369148	5.49552	0	0	0
RUTELLA_RESPONSE_TO_HGF_VS_CSF2RB_AND_IL4_UP	363	0.246124	5.45431	0	0	0
TARTE_PLASMA_CELL_VS_PLASMABLAST_DN	280	0.279236	5.45162	0	0	0
LOCKWOOD_AMPLIFIED_IN_LUNG_CANCER	195	0.335073	5.43574	0	0	0
ENK_UV_RESPONSE_EPIDERMIS_DN	476	0.219821	5.43241	0	0	0
BLUM_RESPONSE_TO_SALIRASIB_UP	222	0.309419	5.42284	0	0	0
RUTELLA_RESPONSE_TO_HGF_UP	374	0.242598	5.4169	0	0	0
LU_EZH2_TARGETS_DN	350	0.241694	5.40583	0	0	0
DOUGLAS_BMI1_TARGETS_DN	287	0.281107	5.40332	0	0	0
RODRIGUES_THYROID_CARCINOMA_ANAPLASTIC_DN	465	0.21626	5.39727	0	0	0
ASTON_MAJOR_DEPRESSIVE_DISORDER_DN	148	0.370084	5.35501	0	0	0
DEBIASI_APOPTOSIS_BY_REOVIRUS_INFECTION_DN	257	0.290412	5.34408	0	0	0
LEIN_NEURON_MARKERS	67	0.543491	5.27726	0	0	0
VANOEVELEN_MYOGENESIS_SIN3A_TARGETS	204	0.31537	5.24954	0	0	0
HAN_SATB1_TARGETS_UP	380	0.234456	5.23865	0	0	0
LAIHO_COLORECTAL_CANCER_SERRATED_UP	100	0.438126	5.23192	0	0	0
ACEVEDO_NORMAL_TISSUE_ADJACENT_TO_LIVER_TUMOR_DN	318	0.256467	5.23124	0	0	0
MOHANKUMAR_HOXA1_TARGETS_UP	376	0.240309	5.22051	0	0	0
DUTERTRE_ESTRADIOL_RESPONSE_24HR_DN	467	0.208662	5.22007	0	0	0
DAVICIONI_MOLECULAR_ARMS_VS_ERMS_UP	307	0.253096	5.15348	0	0	0
HORIUCHI_WTAP_TARGETS_DN	290	0.262054	5.12276	0	0	0
WANG_SMARCE1_TARGETS_DN	334	0.246066	5.11904	0	0	0
GRUETZMANN_PANCREATIC_CANCER_UP	330	0.244165	5.1098	0	0	0
FOURNIER_ACINAR_DEVELOPMENT_LATE_2	260	0.273228	5.09813	0	0	0
BIDUS_METASTASIS_UP	197	0.318381	5.09381	0	0	0
WANG_LMO4_TARGETS_UP	313	0.249496	5.09152	0	0	0
THUM_SYSTOLIC_HEART_FAILURE_UP	372	0.229781	5.08046	0	0	0
MITSIADES_RESPONSE_TO_APLIDIN_DN	227	0.290432	5.04231	0	0	0
PASINI_SUZ12_TARGETS_DN	298	0.252828	5.0407	0	0	0
STEARMAN_LUNG_CANCER_EARLY_VS_LATE_UP	115	0.40557	5.03775	0	0	0
JOHNSTONE_PARVB_TARGETS_3_UP	377	0.229897	5.03752	0	0	0
DAZARD_RESPONSE_TO_UV_NHEK_DN	268	0.265959	5.02119	0	0	0
GINESTIER_BREAST_CANCER_ZNF217_AMPLIFIED_DN	296	0.248216	5.01504	0	0	0
HELLER_HDAC_TARGETS_UP	259	0.264185	5.00667	0	0	0
KIM_WT1_TARGETS_DN	437	0.212203	4.99822	0	0	0
GROSS_HYPOXIA_VIA_ELK3_UP	197	0.303963	4.99242	0	0	0
SHEDDEN_LUNG_CANCER_POOR_SURVIVAL_A6	420	0.206979	4.98635	0	0	0
KARLSSON_TGFB1_TARGETS_UP	117	0.393266	4.98549	0	0	0
PAL_PRMT5_TARGETS_UP	193	0.305688	4.9799	0	0	0
TIEN_INTESTINE_PROBIOTICS_6HR_DN	160	0.33431	4.96384	0	0	0
CAIRO_LIVER_DEVELOPMENT_UP	158	0.33819	4.96195	0	0	0
TIEN_INTESTINE_PROBIOTICS_24HR_DN	194	0.306101	4.9484	0	0	0
THEILGAARD_NEUTROPHIL_AT_SKIN_WOUND_DN	217	0.285283	4.94636	0	0	0
JIANG_HYPOXIA_NORMAL	187	0.315732	4.93583	0	0	0
MOREAUX_MULTIPLE_MYELOMA_BY_TACI_DN	149	0.343892	4.9341	0	0	0
IVANOVA_HEMATOPOIESIS_MATURE_CELL	256	0.266616	4.91054	0	0	0
SWEET_LUNG_CANCER_KRAS_UP	429	0.20747	4.89569	0	0	0
MONNIER_POSTRADIATION_TUMOR_ESCAPE_DN	343	0.226825	4.89301	0	0	0
CREIGHTON_ENDOCRINE_THERAPY_RESISTANCE_1	469	0.194223	4.88864	0	0	0
YAO_TEMPORAL_RESPONSE_TO_PROGESTERONE_CLUSTER_11	91	0.433574	4.88468	0	0	0
HELLER_HDAC_TARGETS_SILENCED_BY_METHYLATION_UP	377	0.217732	4.88085	0	0	0
CHANDRAN_METASTASIS_UP	170	0.315488	4.87247	0	0	0
MANALO_HYPOXIA_DN	274	0.255747	4.86735	0	0	0
KARLSSON_TGFB1_TARGETS_DN	184	0.30544	4.85489	0	0	0
LU_AGING_BRAIN_UP	240	0.269968	4.85423	0	0	0
GOLDRATH_HOMEOSTATIC_PROLIFERATION	132	0.365483	4.85227	0	0	0
ENK_UV_RESPONSE_KERATINOCYTE_UP	482	0.191024	4.84745	0	0	0
GENTILE_UV_HIGH_DOSE_DN	266	0.260651	4.84567	0	0	0
TONKS_TARGETS_OF_RUNX1_RUNX1T1_FUSION_MONOCYTE_UP	186	0.300098	4.84144	0	0	0
KAAB_FAILED_HEART_ATRIUM_DN	134	0.363968	4.83935	0	0	0
MOOTHA_VOXPHOS	72	0.500679	4.82971	0	0	0
LEIN_OLIGODENDROCYTE_MARKERS	69	0.482216	4.80854	0	0	0
AMUNDSON_RESPONSE_TO_ARSENITE	193	0.298675	4.80337	0	0	0
BONOME_OVARIAN_CANCER_SURVIVAL_SUBOPTIMAL_DEBULKING	463	0.192328	4.79863	0	0	0
HAHTOLA_MYCOSIS_FUNGOIDES_CD4_DN	105	0.398597	4.78503	0	0	0
TAKAO_RESPONSE_TO_UVB_RADIATION_UP	77	0.458968	4.78402	0	0	0
KYNG_WERNER_SYNDROM_AND_NORMAL_AGING_DN	167	0.317633	4.77211	0	0	0
MATSUDA_NATURAL_KILLER_DIFFERENTIATION	433	0.194605	4.76939	0	0	0
YAO_TEMPORAL_RESPONSE_TO_PROGESTERONE_CLUSTER_10	64	0.500435	4.75883	0	0	0
PHONG_TNF_RESPONSE_VIA_P38_COMPLETE	210	0.287929	4.75768	0	0	0
LIN_NPAS4_TARGETS_UP	156	0.335651	4.75486	0	0	0
KAAB_HEART_ATRIUM_VS_VENTRICLE_DN	239	0.264235	4.75054	0	0	0
BASSO_B_LYMPHOCYTE_NETWORK	134	0.350921	4.74945	0	0	0
BROWNE_HCMV_INFECTION_16HR_UP	206	0.286348	4.74095	0	0	0
NOUZOVA_TRETINOIN_AND_H4_ACETYLATION	121	0.362238	4.73022	0	0	0
RUTELLA_RESPONSE_TO_CSF2RB_AND_IL4_UP	306	0.234191	4.71236	0	0	0
MCCLUNG_CREB1_TARGETS_UP	93	0.41774	4.70323	0	0	0
YAGI_AML_WITH_11Q23_REARRANGED	304	0.231789	4.70219	0	0	0
DANG_REGULATED_BY_MYC_DN	233	0.261126	4.70025	0	0	0
TOYOTA_TARGETS_OF_MIR34B_AND_MIR34C	389	0.204278	4.69681	0	0	0
ALFANO_MYC_TARGETS	227	0.267544	4.69603	0	0	0
NAKAMURA_TUMOR_ZONE_PERIPHERAL_VS_CENTRAL_UP	249	0.25206	4.69497	0	0	0
CONCANNON_APOPTOSIS_BY_EPOXOMICIN_UP	214	0.275614	4.67589	0	0	0
PELLICCIOTTA_HDAC_IN_ANTIGEN_PRESENTATION_UP	63	0.49283	4.66601	0	0	0
GAUSSMANN_MLL_AF4_FUSION_TARGETS_A_UP	175	0.294076	4.65656	0	0	0
PUIFFE_INVASION_INHIBITED_BY_ASCITES_DN	133	0.34952	4.65517	0	0	0
ZHENG_BOUND_BY_FOXP3	453	0.186374	4.64968	0	0	0
CHARAFE_BREAST_CANCER_LUMINAL_VS_BASAL_DN	407	0.200559	4.6489	0	0	0
DING_LUNG_CANCER_EXPRESSION_BY_COPY_NUMBER	94	0.413264	4.63112	0	0	0
YANG_BCL3_TARGETS_UP	308	0.224096	4.6295	0	0	0
IVANOVA_HEMATOPOIESIS_INTERMEDIATE_PROGENITOR	119	0.360559	4.61877	0	0	0
SENESE_HDAC3_TARGETS_DN	473	0.183352	4.60177	0	0	0
FLECHNER_PBL_KIDNEY_TRANSPLANT_OK_VS_DONOR_UP	139	0.332006	4.55848	0	0	0
LINDGREN_BLADDER_CANCER_WITH_LOH_IN_CHR9Q	106	0.381802	4.55705	0	0	0
AGUIRRE_PANCREATIC_CANCER_COPY_NUMBER_DN	220	0.267103	4.54424	0	0	0
WANG_CLIM2_TARGETS_DN	156	0.309373	4.52889	0	0	0
BENPORATH_OCT4_TARGETS	268	0.236595	4.52575	0	0	0
SANSOM_APC_MYC_TARGETS	223	0.261127	4.52215	0	0	0
WELCSH_BRCA1_TARGETS_DN	132	0.342622	4.50619	0	0	0
MITSIADES_RESPONSE_TO_APLIDIN_UP	379	0.204302	4.49962	0	0	0
LINDGREN_BLADDER_CANCER_CLUSTER_2A_DN	120	0.343108	4.49695	0	0	0
COLINA_TARGETS_OF_4EBP1_AND_4EBP2	308	0.222075	4.48954	0	0	0
IKEDA_MIR30_TARGETS_UP	114	0.354957	4.44396	0	0	0
HAHTOLA_MYCOSIS_FUNGOIDES_SKIN_UP	162	0.304503	4.44284	0	0	0
SCHUHMACHER_MYC_TARGETS_UP	74	0.438766	4.41754	0	0	0
ZHENG_FOXP3_TARGETS_IN_THYMUS_UP	189	0.277697	4.41691	0	0	0
KIM_MYC_AMPLIFICATION_TARGETS_UP	180	0.276886	4.40389	0	0	0
MARKEY_RB1_ACUTE_LOF_DN	204	0.26434	4.40362	0	0	0
GRAESSMANN_APOPTOSIS_BY_SERUM_DEPRIVATION_UP	500	0.169769	4.39084	0	0	0
MULLIGHAN_MLL_SIGNATURE_1_UP	343	0.202851	4.37743	0	0	0
DURCHDEWALD_SKIN_CARCINOGENESIS_DN	245	0.244613	4.37738	0	0	0
KIM_WT1_TARGETS_12HR_DN	197	0.265639	4.37434	0	0	0
YAGI_AML_WITH_INV_16_TRANSLOCATION	371	0.196497	4.36102	0	0	0
LIU_VMYB_TARGETS_UP	112	0.352998	4.34926	0	0	0
ELVIDGE_HYPOXIA_DN	138	0.312942	4.34288	0	0	0
TAKAO_RESPONSE_TO_UVB_RADIATION_DN	92	0.384892	4.33322	0	0	0
LU_EZH2_TARGETS_UP	236	0.245719	4.33134	0	0	0
VERHAAK_GLIOBLASTOMA_NEURAL	115	0.346371	4.3245	0	0	0
BRUINS_UVC_RESPONSE_EARLY_LATE	285	0.226891	4.32074	0	0	0
PLASARI_TGFB1_TARGETS_10HR_DN	230	0.243027	4.31918	0	0	0
DANG_MYC_TARGETS_UP	125	0.330636	4.30931	0	0	0
SEIDEN_ONCOGENESIS_BY_MET	84	0.409472	4.304	0	0	0
MCBRYAN_PUBERTAL_BREAST_6_7WK_UP	176	0.28057	4.30313	0	0	0
KINSEY_TARGETS_OF_EWSR1_FLII_FUSION_DN	291	0.217064	4.3008	0	0	0
MODY_HIPPOCAMPUS_POSTNATAL	56	0.477618	4.29989	0	0	0
SENGUPTA_NASOPHARYNGEAL_CARCINOMA_WITH_LMP1_UP	350	0.200674	4.29796	0	0	0
LINDGREN_BLADDER_CANCER_CLUSTER_3_UP	293	0.216284	4.29511	0	0	0
LASTOWSKA_NEUROBLASTOMA_COPY_NUMBER_UP	169	0.28031	4.29088	0	0	0
DEURIG_T_CELL_PROLYMPHOCYTIC_LEUKEMIA_DN	270	0.223706	4.28979	0	0	0
PHONG_TNF_RESPONSE_NOT_VIA_P38	317	0.206285	4.27104	0	0	0
HELLER_HDAC_TARGETS_DN	267	0.230439	4.24006	0	0	0
CHEN_HOXA5_TARGETS_9HR_UP	177	0.274457	4.23743	0	0	0
MULLIGHAN_MLL_SIGNATURE_2_UP	378	0.186825	4.23637	0	0	0
SCHLOSSER_SERUM_RESPONSE_AUGMENTED_BY_MYC	97	0.363016	4.23255	0	0	0
OSWALD_HEMATOPOIETIC_STEM_CELL_IN_COLLAGEN_GEL_DN	228	0.244737	4.23033	0	0	0
HORIUCHI_WTAP_TARGETS_UP	260	0.233065	4.22402	0	0	0
YAGI_AML_WITH_T_8_21_TRANSLOCATION	325	0.204483	4.20365	0	0	0
RAO_BOUND_BY_SALL4_ISOFORM_B	466	0.168519	4.20256	0	0	0
PUJANA_BRCA2_PCC_NETWORK	388	0.179645	4.19493	0	0	0
ZWANG_CLASS_1_TRANSIENTLY_INDUCED_BY_EGF	455	0.169506	4.18272	0	0	0
BASAKI_YBX1_TARGETS_DN	335	0.193659	4.17449	0	0	0
WONG_PROTEASOME_GENE_MODULE	47	0.525206	4.16842	0	0	0
ZHOU_INFLAMMATORY_RESPONSE_LIVE_DN	323	0.199876	4.16655	0	0	0
SAKAI_CHRONIC_HEPATITIS_VS_LIVER_CANCER_UP	75	0.412113	4.16515	0	0	0
GINESTIER_BREAST_CANCER_20Q13_AMPLIFICATION_UP	92	0.376016	4.15968	0	0	0
LIAO_METASTASIS	476	0.163267	4.15325	0	0	0
OUELLET_OVARIAN_CANCER_INVASIVE_VS_LMP_UP	105	0.356859	4.14909	0	0	0
UDAYAKUMAR_MED1_TARGETS_UP	125	0.316886	4.14819	0	0	0
LIU_SOX4_TARGETS_UP	122	0.319708	4.14797	0	0	0
BYSTRYKH_HEMATOPOIESIS_STEM_CELL_AND_BRAIN_QTL_CIS	60	0.444709	4.14762	0	0	0
JIANG_AGING_HYPOTHALAMUS_DN	33	0.611407	4.13313	0	0	0
SCHAEFFER_PROSTATE_DEVELOPMENT_48HR_DN	390	0.181892	4.1233	0	0	0
BROWNE_HCMV_INFECTION_18HR_UP	160	0.27372	4.12165	0	0	0
MCCLUNG_DELTA_FOSB_TARGETS_8WK	48	0.508811	4.10588	0	0	0
BLALOCK_ALZHEIMERS_DISEASE_INCIPIENT_UP	336	0.196857	4.10108	0	0	0
BYSTRYKH_HEMATOPOIESIS_STEM_CELL_QTL_CIS	118	0.326684	4.09982	0	0	0
BLUM_RESPONSE_TO_SALIRASIB_DN	320	0.201384	4.07593	0	0	0
ZHENG_GLIOBLASTOMA_PLASTICITY_UP	229	0.235127	4.07425	0	0	0
DE_YY1_TARGETS_DN	91	0.360871	4.07308	0	0	0
MCBRYAN_PUBERTAL_TGFB1_TARGETS_UP	161	0.275747	4.07039	0	0	0
HOLLMANN_APOPTOSIS_VIA_CD40_DN	224	0.231753	4.06142	0	0	0
KRIEG_KDM3A_TARGETS_NOT_HYPOXIA	177	0.259994	4.05815	0	0	0
RODWELL_AGING_KIDNEY_UP	414	0.175964	4.05668	0	0	0
STARK_HYPPOCAMPUS_22Q11_DELETION_UP	47	0.508855	4.05288	0	0	0
LEE_AGING_NEOCORTEX_UP	70	0.414964	4.04487	0	0	0
FOSTER_TOLERANT_MACROPHAGE_DN	380	0.1845	4.04386	0	0	0
PODAR_RESPONSE_TO_ADAPHOSTIN_UP	127	0.30615	4.0405	0	0	0
LEE_LIVER_CANCER_SURVIVAL_DN	160	0.276598	4.03838	0	0	0
RATTENBACHER_BOUND_BY_CELF1	351	0.186379	4.02677	0	0	0
BOUDOUKHA_BOUND_BY_IGF2BP2	99	0.341558	4.02234	0	0	0
WANG_RESPONSE_TO_GSK3_INHIBITOR_SB216763_DN	326	0.198505	4.01704	0	0	0
COLDREN_GEFITINIB_RESISTANCE_UP	76	0.393492	4.0162	0	0	0
KIM_WT1_TARGETS_8HR_UP	155	0.281138	4.01587	0	0	0
ZHONG_SECRETOME_OF_LUNG_CANCER_AND_FIBROBLAST	125	0.304655	4.00392	0	0	0
SCHLOSSER_MYC_TARGETS_AND_SERUM_RESPONSE_DN	47	0.493183	4.00218	0	0	0
BILANGES_RAPAMYCIN_SENSITIVE_VIA_TSC1_AND_TSC2	63	0.426306	3.9942	0	0	0
KYNG_DNA_DAMAGE_DN	167	0.268622	3.98428	0	0	0
LEI_MYB_TARGETS	290	0.204272	3.97894	0	0	0
FULCHER_INFLAMMATORY_RESPONSE_LECTIN_VS_LPS_DN	372	0.178163	3.97422	0	0	0
FISCHER_DIRECT_P53_TARGETS_META_ANALYSIS	276	0.200467	3.97353	0	0	0
SESTO_RESPONSE_TO_UV_C0	99	0.343121	3.97245	0	0	0
LI_WILMS_TUMOR_VS_FETAL_KIDNEY_1_UP	174	0.256092	3.95774	0	0	0
MARTENS_BOUND_BY_PML_RARA_FUSION	414	0.168435	3.95078	0	0	0
SANA_RESPONSE_TO_IFNG_DN	80	0.374963	3.95075	0	0	0
TOOKER_GEMCITABINE_RESISTANCE_DN	113	0.317141	3.9476	0	0	0
GAZDA_DIAMOND_BLACKFAN_ANEMIA_ERYTHROID_DN	377	0.176965	3.94421	0	0	0
JIANG_AGING_CEREBRAL_CORTEX_DN	47	0.491226	3.93279	0	0	0
ENK_UV_RESPONSE_EPIDERMIS_UP	263	0.207797	3.9302	0	0	0
JISON_SICKLE_CELL_DISEASE_DN	168	0.258336	3.92871	0	0	0
GROSS_HYPOXIA_VIA_ELK3_AND_HIF1A_DN	97	0.338769	3.91903	0	0	0
VANHARANTA_UTERINE_FIBROID_WITH_7Q_DELETION_UP	65	0.417271	3.91231	0	0	0
MARTORIATI_MDM4_TARGETS_NEUROEPITHELIUM_DN	149	0.27236	3.90452	0	0	0
TOMLINS_PROSTATE_CANCER_UP	36	0.562237	3.90183	0	0	0
RODRIGUES_DCC_TARGETS_DN	111	0.314154	3.89472	0	0	0
ZHU_CMV_24_HR_UP	77	0.385573	3.89301	0	0	0
CAIRO_HEPATOBLASTOMA_UP	193	0.240717	3.89134	0	0	0
ZHONG_RESPONSE_TO_AZACITIDINE_AND_TSA_UP	151	0.272142	3.88899	0	0	0
RICKMAN_TUMOR_DIFFERENTIATED_WELL_VS_POORLY_DN	342	0.178805	3.88622	0	0	0
RIGGINS_TAMOXIFEN_RESISTANCE_DN	200	0.229706	3.87845	0	0	0
CREIGHTON_ENDOCRINE_THERAPY_RESISTANCE_4	273	0.199968	3.87651	0	0	0
PURBEY_TARGETS_OF_CTBP1_NOT_SATB1_DN	361	0.175077	3.87242	0	0	0
MALONEY_RESPONSE_TO_17AAG_DN	67	0.39635	3.86985	0	0	0
YAGI_AML_FAB_MARKERS	181	0.243424	3.86105	0	0	0
BENPORATH_MYC_TARGETS_WITH_EBOX	215	0.228096	3.86089	0	0	0
GROSS_HYPOXIA_VIA_HIF1A_UP	71	0.393769	3.8582	0	0	0
BURTON_ADIPOGENESIS_5	103	0.322738	3.85415	0	0	0
HAN_SATB1_TARGETS_DN	342	0.181302	3.85218	0	0	0
MARKEY_RB1_ACUTE_LOF_UP	221	0.222659	3.84005	0	0	0
WAKABAYASHI_ADIPOGENESIS_PPARG_RXRA_BOUND_WITH_H4K20ME1_MARK	137	0.281504	3.83496	0	0	0
GRUETZMANN_PANCREATIC_CANCER_DN	186	0.245752	3.83418	0	0	0
BENPORATH_ES_1	353	0.180228	3.82081	0	0	0
SCHLOSSER_MYC_TARGETS_AND_SERUM_RESPONSE_UP	46	0.469059	3.81885	0	0	0
SCIBETTA_KDM5B_TARGETS_DN	74	0.371021	3.818	0	0	0
WANG_CLIM2_TARGETS_UP	206	0.230669	3.81741	0	0	0
WINNEPENNINCKX_MELANOMA_METASTASIS_UP	148	0.265273	3.80545	0	0	0
ACEVEDO_NORMAL_TISSUE_ADJACENT_TO_LIVER_TUMOR_UP	146	0.268048	3.79704	0	0	0
HIRSCH_CELLULAR_TRANSFORMATION_SIGNATURE_UP	223	0.218647	3.79394	0	0	0
BROWNE_HCMV_INFECTION_4HR_DN	216	0.220298	3.79248	0	0	0
DITTMER_PTHLH_TARGETS_DN	62	0.409325	3.79174	0	0	0
BURTON_ADIPOGENESIS_6	169	0.242598	3.7833	0	0	0
PROVENZANI_METASTASIS_UP	174	0.245825	3.78199	0	0	0
CROMER_METASTASIS_UP	67	0.391717	3.77953	0	0	0
UDAYAKUMAR_MED1_TARGETS_DN	219	0.219868	3.77002	0	0	0
FOSTER_KDM1A_TARGETS_DN	187	0.235993	3.76436	0	0	0
RICKMAN_TUMOR_DIFFERENTIATED_WELL_VS_POORLY_UP	212	0.226319	3.76326	0	0	0
SASSON_RESPONSE_TO_GONADOTROPHINS_DN	81	0.351659	3.76279	0	0	0
MARTINEZ_RB1_TARGETS_DN	496	0.144328	3.76008	0	0	0
PECE_MAMMARY_STEM_CELL_DN	127	0.287076	3.75142	0	0	0
DITTMER_PTHLH_TARGETS_UP	106	0.312439	3.74649	0	0	0
WHITFIELD_CELL_CYCLE_M_G1	118	0.298595	3.74341	0	0	0
SHEPARD_BMYB_MORPHOLINO_UP	195	0.2254	3.72737	0	0	0
SASSON_RESPONSE_TO_FORSKOLIN_DN	80	0.366636	3.72717	0	0	0
TIEN_INTESTINE_PROBIOTICS_2HR_DN	85	0.341833	3.72535	0	0	0
SESTO_RESPONSE_TO_UV_C8	66	0.387553	3.71903	0	0	0
FISCHER_G2_M_CELL_CYCLE	217	0.212403	3.71105	0	0	0
ZHANG_RESPONSE_TO_CANTHARIDIN_DN	59	0.413253	3.71019	0	0	0
LI_WILMS_TUMOR_VS_FETAL_KIDNEY_1_DN	151	0.260287	3.70583	0	0	0
MATTIOLI_MGUS_VS_PCL	93	0.320712	3.70315	0	0	0
SMITH_TERT_TARGETS_UP	135	0.269693	3.70261	0	0	0
WAMUNYOKOLI_OVARIAN_CANCER_LMP_DN	175	0.246947	3.70108	0	0	0
IKEDA_MIR1_TARGETS_UP	54	0.426569	3.69824	0	0	0
DAIRKEE_CANCER_PRONE_RESPONSE_BPA	49	0.456673	3.69301	0	0	0
EPPERT_PROGENITOR	126	0.280721	3.67097	0	0	0
DANG_REGULATED_BY_MYC_UP	61	0.399066	3.66887	0	0	0
RUTELLA_RESPONSE_TO_CSF2RB_AND_IL4_DN	279	0.191388	3.66675	0	0	0
RIZKI_TUMOR_INVASIVENESS_3D_DN	237	0.201348	3.66647	0	0	0
ACEVEDO_LIVER_CANCER_DN	479	0.147478	3.65837	0	0	0
BERTUCCI_MEDULLARY_VS_DUCTAL_BREAST_CANCER_UP	175	0.244236	3.6576	0	0	0
BILD_MYC_ONCOGENIC_SIGNATURE	177	0.238573	3.64976	0	0	0
LI_DCP2_BOUND_MRNA	80	0.357183	3.64753	0	0	0
MUELLER_PLURINET	282	0.187825	3.64508	0	0	0
MCBRYAN_PUBERTAL_BREAST_4_5WK_DN	181	0.231988	3.63519	0	0	0
CUI_TCF21_TARGETS_2_UP	396	0.154102	3.62966	0	0	0
RAY_TUMORIGENESIS_BY_ERBB2_CDC25A_DN	245	0.201901	3.62215	0	0	0
LIM_MAMMARY_STEM_CELL_UP	461	0.145614	3.62212	0	0	0
LI_AMPLIFIED_IN_LUNG_CANCER	171	0.236842	3.61838	0	0	0
KIM_WT1_TARGETS_UP	207	0.215351	3.61795	0	0	0
SANSOM_APC_TARGETS_REQUIRE_MYC	203	0.215127	3.61522	0	0	0
PECE_MAMMARY_STEM_CELL_UP	118	0.287652	3.61333	0	0	0
WAMUNYOKOLI_OVARIAN_CANCER_LMP_UP	249	0.200007	3.60875	0	0	0
GINESTIER_BREAST_CANCER_20Q13_AMPLIFICATION_DN	154	0.250362	3.60134	0	0	0
HELLER_HDAC_TARGETS_SILENCED_BY_METHYLATION_DN	250	0.196819	3.60029	0	0	0
BACOLOD_RESISTANCE_TO_ALKYLATING_AGENTS_DN	45	0.454203	3.59951	0	0	0
DACOSTA_UV_RESPONSE_VIA_ERCC3_COMMON_UP	62	0.393121	3.59627	0	0	0
CHICAS_RB1_TARGETS_CONFLUENT	497	0.138425	3.59028	0	0	0
JOHANSSON_GLIOMAGENESIS_BY_PDGFB_UP	52	0.42846	3.58684	0	0	0
GARGALOVIC_RESPONSE_TO_OXIDIZED_PHOSPHOLIPIDS_BLUE_UP	118	0.285384	3.58385	0	0	0
ASTIER_INTEGRIN_SIGNALING	53	0.416981	3.58095	0	0	0
MULLIGHAN_NPM1_SIGNATURE_3_UP	298	0.181402	3.57252	0	0	0
BURTON_ADIPOGENESIS_9	77	0.355296	3.56675	0	0	0
YAO_TEMPORAL_RESPONSE_TO_PROGESTERONE_CLUSTER_7	68	0.36646	3.56614	0	0	0
XU_GH1_AUTOCRINE_TARGETS_DN	118	0.276807	3.56293	0	0	0
GAVIN_FOXP3_TARGETS_CLUSTER_T7	90	0.325613	3.56211	0	0	0
IVANOVSKA_MIR106B_TARGETS	80	0.339984	3.55955	0	0	0
WATANABE_RECTAL_CANCER_RADIOTHERAPY_RESPONSIVE_UP	96	0.306862	3.55812	0	0	0
BURTON_ADIPOGENESIS_4	40	0.472993	3.55507	0	0	0
CHAUHAN_RESPONSE_TO_METHOXYESTRADIOL_DN	93	0.318678	3.5537	0	0	0
PELLICCIOTTA_HDAC_IN_ANTIGEN_PRESENTATION_DN	45	0.44424	3.55191	0	0	0
ZHAN_MULTIPLE_MYELOMA_UP	53	0.409641	3.5519	0	0	0
DAZARD_UV_RESPONSE_CLUSTER_G6	126	0.278792	3.55078	0	0	0
GOLDRATH_ANTIGEN_RESPONSE	317	0.168807	3.54866	0	0	0
JOHNSTONE_PARVB_TARGETS_2_UP	125	0.270659	3.54834	0	0	0
FLECHNER_PBL_KIDNEY_TRANSPLANT_REJECTED_VS_OK_UP	61	0.386243	3.54603	0	0	0
FARMER_BREAST_CANCER_APOCRINE_VS_BASAL	302	0.180573	3.53861	0	0	0
WINTER_HYPOXIA_METAGENE	219	0.207742	3.53343	0	0	0
DER_IFN_BETA_RESPONSE_UP	89	0.31908	3.53341	0	0	0
PANGAS_TUMOR_SUPPRESSION_BY_SMAD1_AND_SMAD5_DN	130	0.267319	3.53011	0	0	0
LINDGREN_BLADDER_CANCER_CLUSTER_1_DN	344	0.162706	3.52791	0	0	0
KOYAMA_SEMA3B_TARGETS_DN	321	0.169908	3.52658	0	0	0
HOSHIDA_LIVER_CANCER_SUBCLASS_S1	215	0.205119	3.5255	0	0	0
PANGAS_TUMOR_SUPPRESSION_BY_SMAD1_AND_SMAD5_UP	118	0.278421	3.52544	0	0	0
BILANGES_SERUM_AND_RAPAMYCIN_SENSITIVE_GENES	65	0.375657	3.5239	0	0	0
HILLION_HMGA1B_TARGETS	84	0.325315	3.52163	0	0	0
ZHU_CMV_ALL_UP	100	0.30279	3.51116	0	0	0
STEIN_ESRRA_TARGETS_DN	88	0.316318	3.49741	0	0	0
KIM_WT1_TARGETS_12HR_UP	150	0.246196	3.49718	0	0	0
JISON_SICKLE_CELL_DISEASE_UP	162	0.234928	3.49221	0	0	0
BRUINS_UVC_RESPONSE_VIA_TP53_GROUP_B	493	0.139363	3.49125	0	0	0
SHEPARD_CRUSH_AND_BURN_MUTANT_UP	181	0.22612	3.4907	0	0	0
BROCKE_APOPTOSIS_REVERSED_BY_IL6	137	0.251717	3.48973	0	0	0
ACOSTA_PROLIFERATION_INDEPENDENT_MYC_TARGETS_UP	75	0.33682	3.48683	0	0	0
ALCALA_APOPTOSIS	79	0.333238	3.47733	0	0	0
TSENG_IRS1_TARGETS_UP	104	0.28618	3.47023	0	0	0
HEIDENBLAD_AMPLIFIED_IN_PANCREATIC_CANCER	51	0.405867	3.46941	0	0	0
LEIN_LOCALIZED_TO_PROXIMAL_DENDRITES	34	0.485858	3.4693	0	0	0
MCBRYAN_PUBERTAL_BREAST_5_6WK_DN	122	0.26682	3.46883	0	0	0
JIANG_AGING_HYPOTHALAMUS_UP	38	0.473323	3.46763	0	0	0
ZHOU_TNF_SIGNALING_30MIN	50	0.409209	3.46245	0	0	0
HILLION_HMGA1_TARGETS	84	0.323451	3.45579	0	0	0
WHITFIELD_CELL_CYCLE_G2_M	194	0.216922	3.45358	0	0	0
HOLLMANN_APOPTOSIS_VIA_CD40_UP	189	0.220778	3.45302	0	0	0
SESTO_RESPONSE_TO_UV_C2	50	0.418152	3.44625	0	0	0
CHUNG_BLISTER_CYTOTOXICITY_UP	122	0.270309	3.43996	0	0	0
PASQUALUCCI_LYMPHOMA_BY_GC_STAGE_UP	264	0.183148	3.43779	0	0	0
BROWNE_HCMV_INFECTION_14HR_UP	132	0.253109	3.42879	0	0	0
PICCALUGA_ANGIOIMMUNOBLASTIC_LYMPHOMA_DN	125	0.262097	3.4233	0	0	0
JOHANSSON_BRAIN_CANCER_EARLY_VS_LATE_DN	39	0.459485	3.42284	0	0	0
CHICAS_RB1_TARGETS_SENESCENT	492	0.132753	3.41991	0	0	0
CHESLER_BRAIN_HIGHEST_EXPRESSION	38	0.463384	3.41168	0	0	0
VANTVEER_BREAST_CANCER_ESR1_DN	246	0.185996	3.40544	0	0	0
FIGUEROA_AML_METHYLATION_CLUSTER_3_UP	143	0.244575	3.40486	0	0	0
MCCLUNG_COCAINE_REWARD_5D	69	0.342248	3.39747	0	0	0
DOANE_RESPONSE_TO_ANDROGEN_DN	222	0.199702	3.39658	0	0	0
HIRSCH_CELLULAR_TRANSFORMATION_SIGNATURE_DN	91	0.299768	3.39284	0	0	0
WAKABAYASHI_ADIPOGENESIS_PPARG_RXRA_BOUND_36HR	137	0.246948	3.39255	0	0	0
SHAFFER_IRF4_TARGETS_IN_ACTIVATED_B_LYMPHOCYTE	71	0.337511	3.39077	0	0	0
MULLIGHAN_MLL_SIGNATURE_2_DN	248	0.186326	3.38724	0	0	0
KYNG_RESPONSE_TO_H2O2_VIA_ERCC6_DN	41	0.455284	3.38353	0	0	0
WATANABE_RECTAL_CANCER_RADIOTHERAPY_RESPONSIVE_DN	84	0.316714	3.3802	0	0	0
BYSTRYKH_HEMATOPOIESIS_STEM_CELL_AND_BRAIN_QTL_TRANS	145	0.235823	3.3773	0	0	0
BILD_E2F3_ONCOGENIC_SIGNATURE	223	0.195399	3.37524	0	0	0
MMS_MOUSE_LYMPH_HIGH_4HRS_UP	34	0.492839	3.36962	0	0	0
RODWELL_AGING_KIDNEY_NO_BLOOD_DN	131	0.249668	3.36959	0	0	0
IWANAGA_CARCINOGENESIS_BY_KRAS_PTEN_DN	328	0.162926	3.36799	0	0	0
MARTORIATI_MDM4_TARGETS_FETAL_LIVER_UP	215	0.197405	3.36648	0	0	0
MCCLUNG_DELTA_FOSB_TARGETS_2WK	43	0.434502	3.36363	0	0	0
JAIN_NFKB_SIGNALING	67	0.348139	3.36331	0	0	0
GROSS_HYPOXIA_VIA_ELK3_AND_HIF1A_UP	134	0.240435	3.36172	0	0	0
FARMER_BREAST_CANCER_APOCRINE_VS_LUMINAL	285	0.169472	3.36153	0	0	0
CHANDRAN_METASTASIS_DN	282	0.172132	3.3612	0	0	0
SHAFFER_IRF4_TARGETS_IN_MYELOMA_VS_MATURE_B_LYMPHOCYTE	92	0.297709	3.35314	0	0	0
SUNG_METASTASIS_STROMA_UP	102	0.282961	3.34938	0	0	0
GROSS_HYPOXIA_VIA_HIF1A_DN	101	0.287898	3.3471	0	0	0
CHEMNITZ_RESPONSE_TO_PROSTAGLANDIN_E2_UP	129	0.257203	3.34218	0	0	0
ZHANG_BREAST_CANCER_PROGENITORS_DN	124	0.262208	3.33452	0	0	0
BROWNE_HCMV_INFECTION_48HR_UP	160	0.222328	3.32242	0	0	0
JI_RESPONSE_TO_FSH_DN	51	0.388825	3.32101	0	0	0
NAKAMURA_ADIPOGENESIS_LATE_UP	93	0.292608	3.31867	0	0	0
MARTINEZ_RESPONSE_TO_TRABECTEDIN_UP	65	0.350016	3.3157	0	0	0
BOQUEST_STEM_CELL_CULTURED_VS_FRESH_UP	386	0.147028	3.31431	0	0	0
GAUSSMANN_MLL_AF4_FUSION_TARGETS_C_UP	156	0.228696	3.31292	0	0	0
KAYO_AGING_MUSCLE_DN	105	0.2755	3.30699	0	0	0
COLIN_PILOCYTIC_ASTROCYTOMA_VS_GLIOBLASTOMA_UP	30	0.507799	3.30644	0	0	0
LEE_AGING_CEREBELLUM_UP	70	0.330076	3.30497	0	0	0
NGUYEN_NOTCH1_TARGETS_DN	76	0.315665	3.30416	0	0	0
DAVICIONI_TARGETS_OF_PAX_FOXO1_FUSIONS_UP	240	0.182471	3.30158	0	0	0
MUNSHI_MULTIPLE_MYELOMA_UP	74	0.331004	3.29989	0	0	0
SENGUPTA_NASOPHARYNGEAL_CARCINOMA_UP	268	0.175565	3.29831	0	0	0
WEI_MIR34A_TARGETS	137	0.242089	3.29455	0	0	0
LEE_RECENT_THYMIC_EMIGRANT	191	0.199949	3.29252	0	0	0
DARWICHE_PAPILLOMA_RISK_LOW_DN	145	0.232952	3.29205	0	0	0
COATES_MACROPHAGE_M1_VS_M2_UP	79	0.315873	3.29107	0	0	0
SCHAEFFER_PROSTATE_DEVELOPMENT_6HR_UP	139	0.240586	3.2889	0	0	0
GOTZMANN_EPITHELIAL_TO_MESENCHYMAL_TRANSITION_DN	190	0.208452	3.28868	0	0	0
MULLIGHAN_NPM1_MUTATED_SIGNATURE_1_UP	233	0.181762	3.28851	0	0	0
CHIARADONNA_NEOPLASTIC_TRANSFORMATION_CDC25_UP	115	0.259317	3.28667	0	0	0
BASAKI_YBX1_TARGETS_UP	260	0.172878	3.28587	0	0	0
LEIN_PONS_MARKERS	88	0.295783	3.28341	0	0	0
LE_EGR2_TARGETS_UP	104	0.276314	3.28226	0	0	0
GOTTWEIN_TARGETS_OF_KSHV_MIR_K12_11	57	0.369778	3.28219	0	0	0
MARTORIATI_MDM4_TARGETS_NEUROEPITHELIUM_UP	157	0.222418	3.2736	0	0	0
TONKS_TARGETS_OF_RUNX1_RUNX1T1_FUSION_HSC_UP	167	0.220944	3.26886	0	0	0
BERTUCCI_MEDULLARY_VS_DUCTAL_BREAST_CANCER_DN	156	0.222155	3.26749	0	0	0
AMIT_EGF_RESPONSE_480_HELA	154	0.229575	3.2633	0	0	0
WEST_ADRENOCORTICAL_TUMOR_DN	497	0.128796	3.25246	0	0	0
ULE_SPLICING_VIA_NOVA2	43	0.413156	3.25043	0	0	0
IRITANI_MAD1_TARGETS_DN	43	0.41786	3.24841	0	0	0
DEN_INTERACT_WITH_LCA5	25	0.541008	3.24733	0	0	0
IGLESIAS_E2F_TARGETS_UP	124	0.249725	3.24468	0	0	0
YAMAZAKI_TCEB3_TARGETS_UP	158	0.222557	3.24119	0	0	0
TARTE_PLASMA_CELL_VS_B_LYMPHOCYTE_UP	73	0.328414	3.24023	0	0	0
PILON_KLF1_TARGETS_UP	449	0.132658	3.23952	0	0	0
WANG_TARGETS_OF_MLL_CBP_FUSION_DN	40	0.440945	3.23759	0	0	0
OUELLET_CULTURED_OVARIAN_CANCER_INVASIVE_VS_LMP_UP	66	0.339845	3.23354	0	0	0
LE_EGR2_TARGETS_DN	98	0.2809	3.23178	0	0	0
TOOKER_GEMCITABINE_RESISTANCE_UP	67	0.335911	3.23163	0	0	0
JIANG_VHL_TARGETS	76	0.32139	3.23064	0	0	0
HOSHIDA_LIVER_CANCER_SUBCLASS_S2	111	0.258243	3.22695	0	0	0
WANG_CISPLATIN_RESPONSE_AND_XPC_DN	201	0.198995	3.22651	0	0	0
FERNANDEZ_BOUND_BY_MYC	172	0.21506	3.21825	0	0	0
CONCANNON_APOPTOSIS_BY_EPOXOMICIN_DN	157	0.215706	3.21254	0	0	0
BONOME_OVARIAN_CANCER_SURVIVAL_OPTIMAL_DEBULKING	215	0.191615	3.21169	0	0	0
RIZKI_TUMOR_INVASIVENESS_3D_UP	189	0.200058	3.20502	0	0	0
TERAO_AOX4_TARGETS_HG_UP	24	0.564975	3.20049	0	0	0
VANTVEER_BREAST_CANCER_ESR1_UP	185	0.203177	3.20047	0	0	0
SCHAEFFER_PROSTATE_DEVELOPMENT_AND_CANCER_BOX4_DN	31	0.470723	3.19809	0	0	0
GRESHOCK_CANCER_COPY_NUMBER_UP	303	0.15941	3.19682	0	0	0
VANHARANTA_UTERINE_FIBROID_WITH_7Q_DELETION_DN	35	0.446561	3.19664	0	0	0
LANDIS_ERBB2_BREAST_TUMORS_324_UP	140	0.234307	3.19451	0	0	0
PICCALUGA_ANGIOIMMUNOBLASTIC_LYMPHOMA_UP	189	0.200634	3.19162	0	0	0
SCHLOSSER_MYC_AND_SERUM_RESPONSE_SYNERGY	30	0.493145	3.18871	0	0	0
LIU_CMYB_TARGETS_UP	142	0.224084	3.18814	0	0	0
CHESLER_BRAIN_QTL_CIS	66	0.325804	3.18723	0	0	0
SASAKI_ADULT_T_CELL_LEUKEMIA	153	0.220277	3.18634	0	0	0
DAZARD_RESPONSE_TO_UV_SCC_DN	103	0.266154	3.18434	0	0	0
ROSS_AML_OF_FAB_M7_TYPE	68	0.329142	3.17933	0	0	0
WANG_ESOPHAGUS_CANCER_VS_NORMAL_DN	94	0.278621	3.17723	0	0	0
YAGI_AML_SURVIVAL	116	0.249057	3.17637	0	0	0
SILIGAN_TARGETS_OF_EWS_FLI1_FUSION_UP	15	0.666748	3.1749	0	0	0
WANG_RESPONSE_TO_FORSKOLIN_UP	19	0.608739	3.17467	0	0	0
MAYBURD_RESPONSE_TO_L663536_DN	49	0.38433	3.17162	0	0	0
JAATINEN_HEMATOPOIETIC_STEM_CELL_UP	280	0.164972	3.16898	0	0	0
BHAT_ESR1_TARGETS_VIA_AKT1_UP	265	0.169463	3.16499	0	0	0
SAKAI_TUMOR_INFILTRATING_MONOCYTES_DN	72	0.318166	3.16455	0	0	0
SMIRNOV_RESPONSE_TO_IR_6HR_UP	144	0.222667	3.16372	0	0	0
PURBEY_TARGETS_OF_CTBP1_NOT_SATB1_UP	265	0.166268	3.15366	0	0	0
DARWICHE_PAPILLOMA_RISK_HIGH_DN	155	0.2189	3.15261	0	0	0
HU_ANGIOGENESIS_DN	30	0.468536	3.14539	0	0	0
COULOUARN_TEMPORAL_TGFB1_SIGNATURE_DN	123	0.240896	3.14311	0	0	0
KASLER_HDAC7_TARGETS_1_UP	175	0.199534	3.14193	0	0	0
ZHANG_TARGETS_OF_EWSR1_FLI1_FUSION	81	0.304593	3.13804	0	0	0
RAGHAVACHARI_PLATELET_SPECIFIC_GENES	63	0.341813	3.13759	0	0	0
RODWELL_AGING_KIDNEY_DN	128	0.235672	3.13513	0	0	0
RAMALHO_STEMNESS_DN	65	0.330775	3.135	0	0	0
MAHAJAN_RESPONSE_TO_IL1A_DN	65	0.333439	3.12725	0	0	0
SERVITJA_ISLET_HNF1A_TARGETS_UP	156	0.213669	3.12537	0	0	0
PROVENZANI_METASTASIS_DN	132	0.232965	3.1188	0	0	0
ZHOU_INFLAMMATORY_RESPONSE_FIMA_DN	228	0.174755	3.11752	0	0	0
GUO_HEX_TARGETS_UP	72	0.306851	3.11458	0	0	0
DARWICHE_SQUAMOUS_CELL_CARCINOMA_UP	131	0.23209	3.11431	0	0	0
SASSON_RESPONSE_TO_GONADOTROPHINS_UP	83	0.282523	3.1113	0	0	0
LINDGREN_BLADDER_CANCER_CLUSTER_1_UP	107	0.257603	3.11121	0	0	0
BOCHKIS_FOXA2_TARGETS	381	0.138197	3.10492	0	0	0
QI_PLASMACYTOMA_DN	98	0.268314	3.09841	0	0	0
WANG_RESPONSE_TO_ANDROGEN_UP	25	0.533061	3.09412	0	0	0
SENESE_HDAC1_TARGETS_DN	224	0.17823	3.09189	0	0	0
LUI_TARGETS_OF_PAX8_PPARG_FUSION	30	0.469882	3.088	0	0	0
WANG_RESPONSE_TO_GSK3_INHIBITOR_SB216763_UP	283	0.163164	3.08556	0	0	0
SENESE_HDAC1_AND_HDAC2_TARGETS_UP	205	0.186379	3.08298	0	0	0
SHETH_LIVER_CANCER_VS_TXNIP_LOSS_PAM1	236	0.172219	3.08279	0	0	0
IZADPANAH_STEM_CELL_ADIPOSE_VS_BONE_UP	108	0.263999	3.081	0	0	0
GREGORY_SYNTHETIC_LETHAL_WITH_IMATINIB	121	0.23234	3.07888	0	0	0
BYSTROEM_CORRELATED_WITH_IL5_DN	52	0.360914	3.0736	0	0	0
UEDA_CENTRAL_CLOCK	81	0.288155	3.07132	0	0	0
HOFFMANN_LARGE_TO_SMALL_PRE_BII_LYMPHOCYTE_UP	141	0.222749	3.07094	0	0	0
ZHOU_TNF_SIGNALING_4HR	48	0.370364	3.06986	0	0	0
SENESE_HDAC2_TARGETS_UP	100	0.260481	3.06683	0	0	0
RUTELLA_RESPONSE_TO_HGF_DN	211	0.17855	3.06567	0	0	0
YAMAZAKI_TCEB3_TARGETS_DN	185	0.192815	3.05995	0	0	0
SCHUETZ_BREAST_CANCER_DUCTAL_INVASIVE_UP	309	0.149356	3.05071	0	0	0
CHOI_ATL_STAGE_PREDICTOR	36	0.416076	3.04815	0	0	0
BENPORATH_NOS_TARGETS	162	0.201238	3.04241	0	0	0
FAELT_B_CLL_WITH_VH3_21_DN	44	0.383238	3.03704	0	0	0
GENTILE_UV_RESPONSE_CLUSTER_D4	50	0.360729	3.02252	0	3.19075e-06	0.001
JOHANSSON_GLIOMAGENESIS_BY_PDGFB_DN	20	0.553185	3.02096	0	3.18467e-06	0.001
ONDER_CDH1_TARGETS_2_UP	240	0.166631	3.01605	0	3.1786e-06	0.001
GINESTIER_BREAST_CANCER_ZNF217_AMPLIFIED_UP	62	0.323898	3.01564	0	3.17256e-06	0.001
ZHONG_SECRETOME_OF_LUNG_CANCER_AND_MACROPHAGE	75	0.304925	3.00671	0	3.16654e-06	0.001
CHIARADONNA_NEOPLASTIC_TRANSFORMATION_KRAS_UP	123	0.22863	3.00651	0	3.16054e-06	0.001
IVANOVA_HEMATOPOIESIS_STEM_CELL	179	0.194477	2.99992	0	3.15456e-06	0.001
ABRAMSON_INTERACT_WITH_AIRE	39	0.414243	2.99862	0	6.32724e-06	0.002
IIZUKA_LIVER_CANCER_PROGRESSION_G1_G2_DN	21	0.555713	2.99592	0	6.31532e-06	0.002
FIGUEROA_AML_METHYLATION_CLUSTER_6_UP	118	0.23884	2.99049	0	6.30345e-06	0.002
OUILLETTE_CLL_13Q14_DELETION_UP	59	0.33401	2.98879	0	6.29162e-06	0.002
DARWICHE_SKIN_TUMOR_PROMOTER_UP	126	0.223263	2.98282	0	6.27984e-06	0.002
SETLUR_PROSTATE_CANCER_TMPRSS2_ERG_FUSION_UP	65	0.314147	2.98068	0	9.42958e-06	0.003
MULLIGHAN_NPM1_MUTATED_SIGNATURE_2_UP	120	0.23128	2.98025	0	9.41198e-06	0.003
SHIPP_DLBCL_VS_FOLLICULAR_LYMPHOMA_UP	44	0.375852	2.96801	0	9.39445e-06	0.003
WEIGEL_OXIDATIVE_STRESS_BY_HNE_AND_TBH	58	0.339211	2.96733	0	9.37699e-06	0.003
ZHAN_MULTIPLE_MYELOMA_CD1_AND_CD2_UP	77	0.285055	2.96517	0	9.3596e-06	0.003
RICKMAN_METASTASIS_DN	234	0.166028	2.95392	0	1.87929e-05	0.006
RICKMAN_TUMOR_DIFFERENTIATED_WELL_VS_MODERATELY_UP	94	0.259226	2.95363	0	1.87581e-05	0.006
LOPEZ_TRANSLATION_VIA_FN1_SIGNALING	34	0.425377	2.94528	0	2.17976e-05	0.007
BHATTACHARYA_EMBRYONIC_STEM_CELL	77	0.290126	2.94483	0	2.17574e-05	0.007
LANDIS_ERBB2_BREAST_TUMORS_324_DN	140	0.211631	2.94465	0	2.17174e-05	0.007
KAYO_CALORIE_RESTRICTION_MUSCLE_DN	81	0.280407	2.94409	0	2.16776e-05	0.007
MILI_PSEUDOPODIA_CHEMOTAXIS_UP	78	0.29009	2.93779	0	2.16379e-05	0.007
TORCHIA_TARGETS_OF_EWSR1_FLI1_FUSION_UP	242	0.161629	2.93742	0	2.15983e-05	0.007
POMEROY_MEDULLOBLASTOMA_PROGNOSIS_UP	41	0.384779	2.93724	0	2.15589e-05	0.007
HOELZEL_NF1_TARGETS_UP	128	0.220643	2.93066	0	2.15197e-05	0.007
RAHMAN_TP53_TARGETS_PHOSPHORYLATED	19	0.583371	2.92774	0	2.14805e-05	0.007
DAZARD_RESPONSE_TO_UV_SCC_UP	97	0.258791	2.9268	0	2.14415e-05	0.007
ABDELMOHSEN_ELAVL4_TARGETS	16	0.618368	2.9265	0	2.14027e-05	0.007
CHAUHAN_RESPONSE_TO_METHOXYESTRADIOL_UP	42	0.381572	2.92183	0	2.73933e-05	0.009
IWANAGA_CARCINOGENESIS_BY_KRAS_UP	156	0.20416	2.92003	0	2.73439e-05	0.009
NELSON_RESPONSE_TO_ANDROGEN_UP	75	0.283338	2.91902	0	2.72946e-05	0.009
KAN_RESPONSE_TO_ARSENIC_TRIOXIDE	103	0.24836	2.91674	0	2.72455e-05	0.009
BROWNE_HCMV_INFECTION_24HR_UP	138	0.210987	2.91594	0	2.71966e-05	0.009
DARWICHE_SKIN_TUMOR_PROMOTER_DN	156	0.199791	2.907	0	2.71479e-05	0.009
BOYAULT_LIVER_CANCER_SUBCLASS_G1_DN	32	0.426293	2.90391	0	2.70993e-05	0.009
VERHAAK_GLIOBLASTOMA_CLASSICAL	142	0.211539	2.90311	0	2.70509e-05	0.009
ZHAN_MULTIPLE_MYELOMA_CD1_AND_CD2_DN	49	0.345842	2.90112	0	2.70027e-05	0.009
APRELIKOVA_BRCA1_TARGETS	38	0.400542	2.89783	0	2.69547e-05	0.009
HUTTMANN_B_CLL_POOR_SURVIVAL_UP	239	0.16092	2.89673	0	2.69068e-05	0.009
HUANG_DASATINIB_RESISTANCE_UP	72	0.292681	2.8963	0	2.68591e-05	0.009
WOOD_EBV_EBNA1_TARGETS_DN	42	0.384099	2.89185	0	2.68115e-05	0.009
SASSON_RESPONSE_TO_FORSKOLIN_UP	85	0.268256	2.89171	0	2.67642e-05	0.009
DACOSTA_UV_RESPONSE_VIA_ERCC3_XPCS_DN	81	0.268884	2.88819	0	3.55303e-05	0.012
CHOI_ATL_CHRONIC_VS_ACUTE_DN	17	0.579243	2.88676	0	3.54677e-05	0.012
BURTON_ADIPOGENESIS_8	75	0.287483	2.88406	0	3.54054e-05	0.012
FRIDMAN_SENESCENCE_UP	71	0.297161	2.88263	0	3.83082e-05	0.013
BURTON_ADIPOGENESIS_11	47	0.35024	2.88118	0	4.1166e-05	0.014
CHARAFE_BREAST_CANCER_LUMINAL_VS_BASAL_UP	340	0.133069	2.88	0	4.70246e-05	0.016
RHODES_CANCER_META_SIGNATURE	61	0.309838	2.87512	0	4.69425e-05	0.016
STEARMAN_LUNG_CANCER_EARLY_VS_LATE_DN	53	0.340451	2.87431	0	4.68607e-05	0.016
BROWNE_HCMV_INFECTION_8HR_UP	90	0.264561	2.87328	0	4.67792e-05	0.016
ZHAN_VARIABLE_EARLY_DIFFERENTIATION_GENES_DN	28	0.44617	2.87178	0	4.6698e-05	0.016
BENPORATH_PROLIFERATION	136	0.212308	2.87117	0	4.66171e-05	0.016
FLECHNER_PBL_KIDNEY_TRANSPLANT_OK_VS_DONOR_DN	39	0.383677	2.86964	0	4.65364e-05	0.016
ONDER_CDH1_TARGETS_1_DN	150	0.195167	2.8629	0	4.93046e-05	0.017
VANTVEER_BREAST_CANCER_METASTASIS_DN	119	0.223762	2.86081	0	4.92196e-05	0.017
WAMUNYOKOLI_OVARIAN_CANCER_GRADES_1_2_DN	62	0.305186	2.85835	0	4.91348e-05	0.017
LIU_PROSTATE_CANCER_DN	438	0.115964	2.85676	0	5.1902e-05	0.018
SESTO_RESPONSE_TO_UV_C1	63	0.304407	2.85603	0	5.1813e-05	0.018
SWEET_KRAS_ONCOGENIC_SIGNATURE	83	0.259688	2.85366	0	5.46842e-05	0.019
LUI_THYROID_CANCER_PAX8_PPARG_DN	42	0.365176	2.84888	0	5.45907e-05	0.019
GRABARCZYK_BCL11B_TARGETS_UP	67	0.297559	2.84836	0	5.44976e-05	0.019
CHNG_MULTIPLE_MYELOMA_HYPERPLOID_UP	50	0.336035	2.84736	0	5.44047e-05	0.019
THUM_SYSTOLIC_HEART_FAILURE_DN	176	0.183156	2.84583	0	5.71887e-05	0.02
GROSS_HYPOXIA_VIA_ELK3_DN	141	0.201971	2.84133	0.00190114	5.70916e-05	0.02
HAHTOLA_SEZARY_SYNDROM_UP	84	0.265151	2.84051	0	5.69949e-05	0.02
MORI_PLASMA_CELL_UP	50	0.337593	2.84029	0	5.68984e-05	0.02
UEDA_PERIFERAL_CLOCK	153	0.194537	2.83935	0	5.68023e-05	0.02
GUO_TARGETS_OF_IRS1_AND_IRS2	89	0.253756	2.83841	0	5.67065e-05	0.02
RAO_BOUND_BY_SALL4	204	0.173479	2.83627	0	5.66111e-05	0.02
SHEPARD_CRUSH_AND_BURN_MUTANT_DN	182	0.18191	2.8336	0	5.65159e-05	0.02
RUTELLA_RESPONSE_TO_HGF_VS_CSF2RB_AND_IL4_DN	222	0.163171	2.83291	0	5.64211e-05	0.02
DEURIG_T_CELL_PROLYMPHOCYTIC_LEUKEMIA_UP	316	0.137922	2.8327	0	5.63266e-05	0.02
IKEDA_MIR133_TARGETS_UP	43	0.367065	2.82857	0	5.62324e-05	0.02
LIN_MELANOMA_COPY_NUMBER_DN	36	0.391272	2.82683	0	5.61385e-05	0.02
BAKKER_FOXO3_TARGETS_DN	161	0.192034	2.8268	0	5.60449e-05	0.02
BRUNO_HEMATOPOIESIS	59	0.301531	2.82569	0	5.59517e-05	0.02
WALLACE_PROSTATE_CANCER_RACE_DN	66	0.297002	2.82504	0.00190476	5.58587e-05	0.02
KAUFFMANN_DNA_REPLICATION_GENES	136	0.210855	2.82497	0	5.57661e-05	0.02
ZHANG_PROLIFERATING_VS_QUIESCENT	46	0.361182	2.82306	0	5.84476e-05	0.021
KYNG_ENVIRONMENTAL_STRESS_RESPONSE_UP	48	0.340689	2.82018	0	5.8351e-05	0.021
FAELT_B_CLL_WITH_VH_REARRANGEMENTS_DN	45	0.351669	2.8189	0	5.82547e-05	0.021
DELACROIX_RAR_BOUND_ES	421	0.119678	2.81842	0	5.81587e-05	0.021
WIELAND_UP_BY_HBV_INFECTION	76	0.278567	2.81674	0	5.8063e-05	0.021
PRAMOONJAGO_SOX4_TARGETS_DN	46	0.345637	2.81601	0	6.06886e-05	0.022
BRACHAT_RESPONSE_TO_CAMPTOTHECIN_DN	38	0.384956	2.81366	0	6.33531e-05	0.023
QI_HYPOXIA	125	0.222732	2.81356	0	6.32494e-05	0.023
YAO_TEMPORAL_RESPONSE_TO_PROGESTERONE_CLUSTER_12	76	0.275863	2.81342	0	6.3146e-05	0.023
SESTO_RESPONSE_TO_UV_C5	45	0.357535	2.81212	0	6.3043e-05	0.023
MULLIGAN_NTF3_SIGNALING_VIA_INSR_AND_IGF1R_UP	21	0.5089	2.80935	0	6.29403e-05	0.023
MODY_HIPPOCAMPUS_NEONATAL	29	0.428132	2.80532	0	6.2838e-05	0.023
GARCIA_TARGETS_OF_FLI1_AND_DAX1_DN	144	0.197815	2.80513	0	6.2736e-05	0.023
SCHAEFFER_PROSTATE_DEVELOPMENT_12HR_DN	52	0.324685	2.80341	0	6.26343e-05	0.023
OKUMURA_INFLAMMATORY_RESPONSE_LPS	156	0.190974	2.80249	0	6.2533e-05	0.023
NADLER_OBESITY_UP	54	0.313612	2.80243	0	6.24319e-05	0.023
GERY_CEBP_TARGETS	115	0.223664	2.80169	0	6.49487e-05	0.024
LUI_THYROID_CANCER_CLUSTER_3	26	0.44926	2.79499	0	6.75124e-05	0.025
DELACROIX_RARG_BOUND_MEF	343	0.131284	2.79193	0	7.00269e-05	0.026
TORCHIA_TARGETS_OF_EWSR1_FLI1_FUSION_DN	292	0.138795	2.78931	0	6.99145e-05	0.026
WANG_SMARCE1_TARGETS_UP	264	0.149052	2.78802	0	6.98025e-05	0.026
GOBERT_CORE_OLIGODENDROCYTE_DIFFERENTIATION	38	0.381906	2.78761	0	7.24342e-05	0.027
ELLWOOD_MYC_TARGETS_DN	36	0.380698	2.78644	0	7.23185e-05	0.027
PURBEY_TARGETS_OF_CTBP1_AND_SATB1_DN	149	0.198066	2.78221	0	7.22031e-05	0.027
DACOSTA_UV_RESPONSE_VIA_ERCC3_TTD_DN	80	0.268723	2.78144	0	7.20882e-05	0.027
LEIN_MEDULLA_MARKERS	77	0.271216	2.78133	0	7.46626e-05	0.028
SWEET_LUNG_CANCER_KRAS_DN	380	0.125483	2.78043	0	7.4544e-05	0.028
LEIN_ASTROCYTE_MARKERS	38	0.381568	2.77955	0	7.44259e-05	0.028
MODY_HIPPOCAMPUS_PRENATAL	39	0.380893	2.77875	0	7.43082e-05	0.028
APPEL_IMATINIB_RESPONSE	32	0.402549	2.77641	0	7.68459e-05	0.029
BROWNE_HCMV_INFECTION_48HR_DN	433	0.115196	2.77284	0	7.67246e-05	0.029
FARMER_BREAST_CANCER_BASAL_VS_LULMINAL	302	0.139112	2.77271	0	7.66038e-05	0.029
CARD_MIR302A_TARGETS	75	0.267492	2.77171	0	7.64834e-05	0.029
BOYLAN_MULTIPLE_MYELOMA_D_UP	82	0.262285	2.77169	0	7.63633e-05	0.029
LINDGREN_BLADDER_CANCER_CLUSTER_3_DN	204	0.167634	2.77157	0	7.62436e-05	0.029
KAAB_HEART_ATRIUM_VS_VENTRICLE_UP	242	0.154536	2.7654	0	8.12724e-05	0.031
WEIGEL_OXIDATIVE_STRESS_BY_HNE_AND_H2O2	36	0.37691	2.76404	0	8.11454e-05	0.031
CHENG_RESPONSE_TO_NICKEL_ACETATE	40	0.363624	2.76379	0	8.10188e-05	0.031
WINTER_HYPOXIA_UP	89	0.249693	2.76347	0	8.08926e-05	0.031
LEE_TARGETS_OF_PTCH1_AND_SUFU_DN	81	0.256165	2.76288	0	8.07668e-05	0.031
LINDGREN_BLADDER_CANCER_CLUSTER_2B	341	0.131858	2.75964	0	8.06414e-05	0.031
BROWNE_HCMV_INFECTION_14HR_DN	257	0.1502	2.75743	0	8.05164e-05	0.031
CHIARADONNA_NEOPLASTIC_TRANSFORMATION_CDC25_DN	135	0.205722	2.75717	0	8.03917e-05	0.031
HOEBEKE_LYMPHOID_STEM_CELL_DN	86	0.257819	2.75521	0	8.28549e-05	0.032
KYNG_RESPONSE_TO_H2O2_VIA_ERCC6_UP	34	0.400378	2.75403	0	8.2727e-05	0.032
WIERENGA_PML_INTERACTOME	37	0.374048	2.75086	0	8.52288e-05	0.033
LEE_CALORIE_RESTRICTION_NEOCORTEX_UP	60	0.296405	2.74349	0	8.77745e-05	0.034
JACKSON_DNMT1_TARGETS_UP	78	0.266179	2.74129	0	8.76396e-05	0.034
SARRIO_EPITHELIAL_MESENCHYMAL_TRANSITION_UP	170	0.180084	2.74051	0	8.75052e-05	0.034
TAYLOR_METHYLATED_IN_ACUTE_LYMPHOBLASTIC_LEUKEMIA	67	0.287123	2.73332	0	8.98989e-05	0.035
BOYAULT_LIVER_CANCER_SUBCLASS_G123_UP	44	0.345219	2.729	0	9.21962e-05	0.036
WAMUNYOKOLI_OVARIAN_CANCER_GRADES_1_2_UP	124	0.207451	2.72829	0	9.46173e-05	0.037
KYNG_RESPONSE_TO_H2O2	65	0.281251	2.72373	0	9.69698e-05	0.038
SMITH_TERT_TARGETS_DN	84	0.250653	2.71694	0	9.68222e-05	0.038
GAZDA_DIAMOND_BLACKFAN_ANEMIA_PROGENITOR_DN	57	0.307424	2.71531	0	9.6675e-05	0.038
IGARASHI_ATF4_TARGETS_DN	88	0.245288	2.71389	0	9.65284e-05	0.038
ZHAN_MULTIPLE_MYELOMA_MS_UP	43	0.343903	2.71167	0	9.89185e-05	0.038
SEIDEN_MET_SIGNALING	19	0.519229	2.70994	0	9.87689e-05	0.038
PUJANA_XPRSS_INT_NETWORK	155	0.189106	2.70957	0	9.86197e-05	0.038
ZHAN_MULTIPLE_MYELOMA_CD1_VS_CD2_DN	45	0.345568	2.70899	0	9.84709e-05	0.038
CHANDRAN_METASTASIS_TOP50_UP	29	0.426131	2.70435	0	0.000108425	0.042
DER_IFN_GAMMA_RESPONSE_UP	63	0.282755	2.70263	0	0.000108262	0.042
GUENTHER_GROWTH_SPHERICAL_VS_ADHERENT_UP	21	0.48718	2.70209	0	0.0001081	0.042
KYNG_DNA_DAMAGE_BY_GAMMA_AND_UV_RADIATION	74	0.266747	2.69781	0	0.00011045	0.043
DEMAGALHAES_AGING_UP	46	0.330584	2.69434	0.002	0.000110284	0.043
MCCABE_BOUND_BY_HOXC6	337	0.126809	2.69433	0	0.000110119	0.043
JIANG_AGING_CEREBRAL_CORTEX_UP	29	0.417551	2.69244	0	0.000109955	0.043
DAUER_STAT3_TARGETS_DN	41	0.354064	2.69211	0	0.000109791	0.043
BERENJENO_ROCK_SIGNALING_NOT_VIA_RHOA_DN	46	0.332799	2.69161	0	0.000109628	0.043
HOEBEKE_LYMPHOID_STEM_CELL_UP	83	0.248431	2.69107	0	0.000109465	0.043
TCGA_GLIOBLASTOMA_COPY_NUMBER_UP	63	0.283569	2.69044	0	0.000109302	0.043
BRUECKNER_TARGETS_OF_MIRLET7A3_DN	69	0.276456	2.68455	0	0.000118996	0.047
BARRIER_CANCER_RELAPSE_NORMAL_SAMPLE_DN	28	0.42173	2.68192	0	0.000121362	0.048
KAAB_FAILED_HEART_VENTRICLE_DN	36	0.367428	2.68131	0	0.000121183	0.048
MORI_IMMATURE_B_LYMPHOCYTE_UP	45	0.327329	2.675	0	0.000130993	0.052
CHICAS_RB1_TARGETS_GROWING	215	0.158352	2.67424	0	0.000133278	0.053
KYNG_DNA_DAMAGE_UP	193	0.165828	2.67341	0.00198413	0.000133082	0.053
CUI_GLUCOSE_DEPRIVATION	55	0.300658	2.67038	0	0.000137836	0.055
KYNG_WERNER_SYNDROM_AND_NORMAL_AGING_UP	73	0.27035	2.67013	0	0.000137634	0.055
DARWICHE_SQUAMOUS_CELL_CARCINOMA_DN	151	0.181348	2.66899	0	0.000139913	0.056
RASHI_RESPONSE_TO_IONIZING_RADIATION_2	119	0.206974	2.6645	0	0.000142189	0.057
NIKOLSKY_BREAST_CANCER_8Q23_Q24_AMPLICON	133	0.1965	2.66034	0	0.000144362	0.058
SWEET_KRAS_TARGETS_UP	74	0.264139	2.65342	0	0.000149061	0.06
THEILGAARD_NEUTROPHIL_AT_SKIN_WOUND_UP	70	0.266746	2.65058	0	0.000158615	0.064
DURAND_STROMA_S_UP	255	0.141007	2.63505	0	0.000182859	0.073
GRAESSMANN_RESPONSE_TO_MC_AND_SERUM_DEPRIVATION_UP	188	0.163541	2.63283	0	0.000182593	0.073
BAE_BRCA1_TARGETS_UP	66	0.279669	2.63035	0.00199203	0.000189477	0.076
MACAEVA_PBMC_RESPONSE_TO_IR	85	0.243795	2.62583	0	0.000191597	0.077
RAMASWAMY_METASTASIS_UP	62	0.279756	2.62575	0	0.00019132	0.077
GUTIERREZ_MULTIPLE_MYELOMA_UP	29	0.403645	2.62506	0	0.000191044	0.077
GUO_HEX_TARGETS_DN	59	0.287603	2.62477	0	0.000193176	0.078
PAPASPYRIDONOS_UNSTABLE_ATEROSCLEROTIC_PLAQUE_UP	49	0.31409	2.62447	0	0.000192898	0.078
BEIER_GLIOMA_STEM_CELL_DN	53	0.304355	2.62314	0	0.000195028	0.079
NUTT_GBM_VS_AO_GLIOMA_DN	44	0.331133	2.6223	0	0.000194748	0.079
LANDIS_ERBB2_BREAST_TUMORS_65_DN	36	0.365516	2.62121	0	0.000194469	0.079
RUIZ_TNC_TARGETS_UP	140	0.188237	2.61431	0	0.000208544	0.085
PARK_HSC_MARKERS	41	0.351128	2.60713	0	0.000220214	0.09
YAGI_AML_RELAPSE_PROGNOSIS	34	0.375515	2.60371	0	0.000227185	0.093
GAUSSMANN_MLL_AF4_FUSION_TARGETS_C_DN	18	0.502091	2.60268	0	0.000226862	0.093
CHNG_MULTIPLE_MYELOMA_HYPERPLOID_DN	30	0.38871	2.60247	0	0.000226539	0.093
FRIDMAN_IMMORTALIZATION_DN	29	0.398674	2.60215	0	0.000226217	0.093
ALONSO_METASTASIS_EMT_UP	31	0.385666	2.60205	0	0.000225896	0.093
KOKKINAKIS_METHIONINE_DEPRIVATION_48HR_DN	61	0.280869	2.59745	0	0.000235006	0.097
MILI_PSEUDOPODIA	44	0.330261	2.5973	0	0.000234673	0.097
FORTSCHEGGER_PHF8_TARGETS_UP	238	0.146693	2.59677	0	0.000234342	0.097
BROWNE_HCMV_INFECTION_12HR_UP	94	0.226725	2.59477	0	0.000238716	0.099
RAO_BOUND_BY_SALL4_ISOFORM_A	147	0.180023	2.5928	0	0.000245559	0.102
DARWICHE_PAPILLOMA_RISK_HIGH_UP	127	0.19499	2.58778	0	0.000257056	0.106
GARGALOVIC_RESPONSE_TO_OXIDIZED_PHOSPHOLIPIDS_TURQUOISE_UP	73	0.256309	2.5876	0	0.000256695	0.106
KOYAMA_SEMA3B_TARGETS_UP	223	0.149508	2.58755	0	0.000256335	0.106
BERNARD_PPAPDC1B_TARGETS_UP	36	0.358382	2.58387	0	0.000260686	0.108
BILANGES_SERUM_RESPONSE_TRANSLATION	33	0.367065	2.58349	0	0.000260321	0.108
CHANDRAN_METASTASIS_TOP50_DN	39	0.35144	2.58263	0	0.000259957	0.108
NIKOLSKY_BREAST_CANCER_20Q12_Q13_AMPLICON	123	0.196027	2.58242	0	0.000259595	0.108
CHEOK_RESPONSE_TO_MERCAPTOPURINE_AND_HD_MTX_DN	23	0.436748	2.5801	0	0.000266225	0.11
GRAESSMANN_APOPTOSIS_BY_SERUM_DEPRIVATION_DN	216	0.150733	2.57952	0	0.000265854	0.11
ELVIDGE_HIF1A_TARGETS_UP	63	0.274633	2.57777	0	0.00027005	0.112
ICHIBA_GRAFT_VERSUS_HOST_DISEASE_D7_UP	94	0.226659	2.5775	0	0.000269675	0.112
NAGASHIMA_EGF_SIGNALING_UP	55	0.292766	2.5759	0	0.000273933	0.113
PLASARI_TGFB1_SIGNALING_VIA_NFIC_1HR_DN	104	0.219337	2.5751	0	0.000273555	0.113
FIGUEROA_AML_METHYLATION_CLUSTER_7_UP	99	0.221397	2.57088	0	0.000287427	0.119
YAGI_AML_WITH_T_9_11_TRANSLOCATION	119	0.200458	2.5703	0	0.00028703	0.119
KOKKINAKIS_METHIONINE_DEPRIVATION_96HR_UP	113	0.204454	2.56635	0	0.00029823	0.124
BOQUEST_STEM_CELL_DN	192	0.160447	2.56493	0	0.000302482	0.125
MOLENAAR_TARGETS_OF_CCND1_AND_CDK4_UP	51	0.304693	2.56436	0	0.000304345	0.125
HU_GENOTOXIN_ACTION_DIRECT_VS_INDIRECT_24HR	42	0.334986	2.56361	0	0.000310801	0.128
MCLACHLAN_DENTAL_CARIES_DN	74	0.255566	2.56122	0	0.000319477	0.132
GENTILE_UV_RESPONSE_CLUSTER_D5	35	0.366355	2.56078	0	0.00031904	0.132
DORN_ADENOVIRUS_INFECTION_24HR_DN	39	0.345539	2.55974	0	0.000318604	0.132
NUTT_GBM_VS_AO_GLIOMA_UP	42	0.337445	2.5596	0.00204918	0.00031817	0.132
BILBAN_B_CLL_LPL_UP	51	0.305459	2.5575	0	0.000322371	0.132
DAVICIONI_RHABDOMYOSARCOMA_PAX_FOXO1_FUSION_UP	60	0.280749	2.55654	0	0.000324205	0.133
YUAN_ZNF143_PARTNERS	21	0.467246	2.55626	0	0.000323764	0.133
FAELT_B_CLL_WITH_VH3_21_UP	43	0.320883	2.55294	0	0.000325651	0.134
EHLERS_ANEUPLOIDY_UP	36	0.353195	2.5504	0	0.00032521	0.134
MORI_LARGE_PRE_BII_LYMPHOCYTE_UP	81	0.239017	2.54876	0	0.000329287	0.135
WILCOX_RESPONSE_TO_PROGESTERONE_UP	131	0.19139	2.54859	0	0.000328842	0.135
KANG_DOXORUBICIN_RESISTANCE_DN	18	0.491763	2.54476	0	0.000337565	0.137
HADDAD_B_LYMPHOCYTE_PROGENITOR	237	0.142733	2.54472	0.00196464	0.00033711	0.137
CHENG_IMPRINTED_BY_ESTRADIOL	97	0.21955	2.54456	0	0.000338933	0.138
MORI_MATURE_B_LYMPHOCYTE_UP	75	0.255277	2.54369	0	0.000338478	0.138
LIN_NPAS4_TARGETS_DN	64	0.271923	2.54262	0.00212314	0.000338023	0.138
FLOTHO_PEDIATRIC_ALL_THERAPY_RESPONSE_UP	49	0.304911	2.54207	0	0.000342067	0.14
JAZAG_TGFB1_SIGNALING_UP	98	0.217772	2.54163	0	0.000341609	0.14
BREDEMEYER_RAG_SIGNALING_VIA_ATM_NOT_VIA_NFKB_DN	32	0.37947	2.54024	0	0.000341152	0.14
MIYAGAWA_TARGETS_OF_EWSR1_ETS_FUSIONS_DN	207	0.15434	2.53666	0	0.000354195	0.144
MELLMAN_TUT1_TARGETS_DN	44	0.321326	2.53493	0	0.000358175	0.146
MAYBURD_RESPONSE_TO_L663536_UP	23	0.44835	2.53485	0	0.000357698	0.146
POMEROY_MEDULLOBLASTOMA_DESMOPLASIC_VS_CLASSIC_UP	56	0.283417	2.53356	0	0.000361601	0.148
HOLLEMAN_ASPARAGINASE_RESISTANCE_B_ALL_UP	25	0.427795	2.53149	0	0.000369859	0.151
BURTON_ADIPOGENESIS_2	70	0.261314	2.52736	0	0.000380305	0.155
GARGALOVIC_RESPONSE_TO_OXIDIZED_PHOSPHOLIPIDS_BLUE_DN	57	0.280747	2.52689	0	0.000379801	0.155
AMIT_EGF_RESPONSE_240_HELA	57	0.284364	2.52646	0	0.000381484	0.156
HONMA_DOCETAXEL_RESISTANCE	31	0.382744	2.52576	0	0.000385377	0.157
DUNNE_TARGETS_OF_AML1_MTG8_FUSION_DN	17	0.517125	2.52386	0	0.000389295	0.158
RASHI_RESPONSE_TO_IONIZING_RADIATION_5	125	0.191692	2.52307	0	0.000393242	0.159
PUIFFE_INVASION_INHIBITED_BY_ASCITES_UP	67	0.267601	2.51788	0	0.000405887	0.164
DACOSTA_UV_RESPONSE_VIA_ERCC3_TTD_UP	55	0.288167	2.51613	0.0019305	0.000412012	0.165
PEDERSEN_METASTASIS_BY_ERBB2_ISOFORM_7	339	0.121348	2.51521	0	0.000415911	0.167
DAIRKEE_CANCER_PRONE_RESPONSE_BPA_E2	108	0.207333	2.51398	0	0.000426343	0.171
SCIAN_INVERSED_TARGETS_OF_TP53_AND_TP73_DN	29	0.390692	2.51289	0	0.000430071	0.173
MORI_EMU_MYC_LYMPHOMA_BY_ONSET_TIME_UP	103	0.212366	2.51282	0	0.000429509	0.173
LAIHO_COLORECTAL_CANCER_SERRATED_DN	76	0.241707	2.51038	0	0.000428948	0.173
BROWN_MYELOID_CELL_DEVELOPMENT_DN	111	0.201949	2.50811	0	0.000428389	0.173
PASQUALUCCI_LYMPHOMA_BY_GC_STAGE_DN	158	0.173875	2.50705	0	0.000427831	0.173
KIM_HYPOXIA	19	0.479236	2.50612	0	0.00043164	0.174
CAFFAREL_RESPONSE_TO_THC_24HR_5_UP	27	0.400654	2.50017	0.00206186	0.000454993	0.184
CREIGHTON_AKT1_SIGNALING_VIA_MTOR_UP	34	0.357996	2.49949	0.00204918	0.000454403	0.184
COULOUARN_TEMPORAL_TGFB1_SIGNATURE_UP	105	0.204774	2.49876	0.00201207	0.00045601	0.185
GALE_APL_WITH_FLT3_MUTATED_UP	53	0.285684	2.49831	0	0.000457517	0.186
ALCALAY_AML_BY_NPM1_LOCALIZATION_DN	169	0.165277	2.49814	0	0.000459132	0.186
WOOD_EBV_EBNA1_TARGETS_UP	100	0.215604	2.49803	0	0.00045854	0.186
MISSIAGLIA_REGULATED_BY_METHYLATION_DN	109	0.206394	2.49733	0	0.000457949	0.186
YAO_TEMPORAL_RESPONSE_TO_PROGESTERONE_CLUSTER_0	69	0.258584	2.49716	0	0.000457359	0.186
TIMOFEEVA_GROWTH_STRESS_VIA_STAT1_DN	16	0.521432	2.49298	0	0.000469613	0.191
AKL_HTLV1_INFECTION_UP	24	0.430144	2.49276	0	0.00046901	0.191
MOREIRA_RESPONSE_TO_TSA_UP	26	0.40669	2.49126	0	0.000477048	0.194
SHAFFER_IRF4_TARGETS_IN_PLASMA_CELL_VS_MATURE_B_LYMPHOCYTE	64	0.262585	2.48744	0	0.000487076	0.199
SIMBULAN_PARP1_TARGETS_DN	16	0.524944	2.48671	0	0.000488627	0.2
FIGUEROA_AML_METHYLATION_CLUSTER_1_UP	104	0.207809	2.48636	0	0.000488003	0.2
NOUZOVA_METHYLATED_IN_APL	55	0.288954	2.4849	0	0.00049368	0.203
MOREAUX_B_LYMPHOCYTE_MATURATION_BY_TACI_DN	64	0.26728	2.48386	0	0.000499459	0.206
BROWNE_HCMV_INFECTION_6HR_DN	149	0.173006	2.48236	0	0.00050312	0.208
HOLLEMAN_PREDNISOLONE_RESISTANCE_B_ALL_UP	18	0.475152	2.48185	0	0.000504571	0.208
HUANG_GATA2_TARGETS_DN	67	0.258735	2.48079	0	0.000506035	0.209
HOSHIDA_LIVER_CANCER_SURVIVAL_DN	102	0.209447	2.47986	0	0.000514013	0.211
FLECHNER_PBL_KIDNEY_TRANSPLANT_REJECTED_VS_OK_DN	48	0.304819	2.47569	0.00200803	0.000528338	0.218
HU_GENOTOXIC_DAMAGE_24HR	31	0.3688	2.47497	0	0.000529886	0.219
ROSS_LEUKEMIA_WITH_MLL_FUSIONS	70	0.251442	2.47196	0	0.000537691	0.222
DARWICHE_PAPILLOMA_RISK_LOW_UP	137	0.179914	2.47095	0	0.000537013	0.222
MOOTHA_FFA_OXYDATION	23	0.4269	2.46683	0	0.000546875	0.227
JOSEPH_RESPONSE_TO_SODIUM_BUTYRATE_UP	28	0.38888	2.46529	0	0.000550495	0.229
BROWNE_HCMV_INFECTION_12HR_DN	87	0.2286	2.46488	0	0.000556156	0.231
MORI_SMALL_PRE_BII_LYMPHOCYTE_UP	72	0.248141	2.46448	0.00205339	0.000557554	0.231
KOBAYASHI_EGFR_SIGNALING_24HR_DN	239	0.140403	2.46343	0	0.000556855	0.231
KYNG_DNA_DAMAGE_BY_4NQO_OR_UV	56	0.278241	2.46191	0	0.000570845	0.235
ONDER_CDH1_TARGETS_1_UP	119	0.188592	2.45905	0	0.000582905	0.238
MISSIAGLIA_REGULATED_BY_METHYLATION_UP	109	0.199442	2.45558	0	0.000609404	0.248
AMIT_EGF_RESPONSE_120_HELA	64	0.261758	2.45523	0	0.000608644	0.248
GRADE_COLON_VS_RECTAL_CANCER_UP	33	0.353047	2.44761	0	0.000651711	0.266
APPIERTO_RESPONSE_TO_FENRETINIDE_UP	35	0.345444	2.44747	0	0.0006509	0.266
SARTIPY_NORMAL_AT_INSULIN_RESISTANCE_UP	29	0.380637	2.44282	0.00204082	0.000681316	0.28
LIU_COMMON_CANCER_GENES	55	0.278361	2.44137	0	0.000686669	0.282
SCHLOSSER_SERUM_RESPONSE_UP	114	0.198672	2.44074	0	0.000689948	0.283
PUJANA_BREAST_CANCER_LIT_INT_NETWORK	95	0.209557	2.43925	0	0.000691131	0.284
TIEN_INTESTINE_PROBIOTICS_6HR_UP	47	0.300918	2.43729	0	0.000698511	0.287
KAMIKUBO_MYELOID_MN1_NETWORK	19	0.460955	2.43332	0	0.000733168	0.299
ZHONG_SECRETOME_OF_LUNG_CANCER_AND_ENDOTHELIUM	64	0.263079	2.43276	0	0.000736311	0.301
YANAGIHARA_ESX1_TARGETS	28	0.390767	2.42963	0.00416667	0.000747927	0.306
BRUINS_UVC_RESPONSE_MIDDLE	88	0.21991	2.42924	0	0.000751148	0.307
KUMAR_TARGETS_OF_MLL_AF9_FUSION	368	0.110286	2.42898	0	0.000750225	0.307
MEINHOLD_OVARIAN_CANCER_LOW_GRADE_DN	19	0.452153	2.42843	0	0.000753489	0.308
KENNY_CTNNB1_TARGETS_UP	48	0.291814	2.42365	0	0.000775053	0.316
IWANAGA_CARCINOGENESIS_BY_KRAS_DN	112	0.194375	2.42206	0	0.00078861	0.322
LENAOUR_DENDRITIC_CELL_MATURATION_UP	100	0.205114	2.41839	0	0.000806147	0.329
ZHAN_LATE_DIFFERENTIATION_GENES_UP	32	0.359984	2.41816	0	0.000805162	0.329
WHITEFORD_PEDIATRIC_CANCER_MARKERS	109	0.199369	2.41811	0	0.00080418	0.329
BOYAULT_LIVER_CANCER_SUBCLASS_G12_UP	37	0.338204	2.41366	0	0.000834008	0.342
HASLINGER_B_CLL_WITH_17P13_DELETION	20	0.451756	2.41075	0	0.00085351	0.35
CADWELL_ATG16L1_TARGETS_DN	55	0.281623	2.40889	0	0.000864726	0.354
LANDIS_ERBB2_BREAST_PRENEOPLASTIC_DN	53	0.28448	2.40792	0	0.00086771	0.355
MULLIGHAN_MLL_SIGNATURE_1_DN	214	0.138473	2.4051	0	0.00089706	0.366
MEISSNER_BRAIN_ICP_WITH_H3K4ME3	27	0.393791	2.40332	0.00206186	0.000928398	0.378
MIDORIKAWA_AMPLIFIED_IN_LIVER_CANCER	50	0.281991	2.40304	0	0.000929355	0.379
PACHER_TARGETS_OF_IGF1_AND_IGF2_UP	36	0.329245	2.40294	0	0.000932228	0.381
EPPERT_HSC_R	107	0.202239	2.40144	0	0.000943246	0.384
SAGIV_CD24_TARGETS_UP	22	0.426726	2.3997	0	0.000960106	0.386
ZWANG_EGF_INTERVAL_DN	185	0.150669	2.39875	0.00394477	0.000969135	0.388
MARKEY_RB1_CHRONIC_LOF_DN	109	0.197493	2.39785	0	0.000978035	0.39
DORSAM_HOXA9_TARGETS_UP	35	0.337221	2.39601	0	0.000986987	0.394
GAZDA_DIAMOND_BLACKFAN_ANEMIA_PROGENITOR_UP	32	0.372046	2.39574	0	0.000985803	0.394
ENGELMANN_CANCER_PROGENITORS_UP	47	0.286867	2.39505	0	0.000988698	0.395
HELLER_SILENCED_BY_METHYLATION_DN	96	0.215735	2.39452	0.00201613	0.000991516	0.396
SMITH_LIVER_CANCER	45	0.305465	2.39414	0	0.000992346	0.397
VARELA_ZMPSTE24_TARGETS_UP	40	0.302282	2.38841	0	0.00103556	0.405
FINETTI_BREAST_CANCERS_KINOME_GRAY	15	0.510678	2.3876	0	0.00103832	0.406
GNATENKO_PLATELET_SIGNATURE	35	0.337761	2.38708	0.00191939	0.00104109	0.408
MEISSNER_NPC_ICP_WITH_H3K4ME3	17	0.474157	2.38528	0	0.00105377	0.413
DOANE_RESPONSE_TO_ANDROGEN_UP	149	0.162676	2.38335	0	0.00106631	0.414
ZWANG_CLASS_3_TRANSIENTLY_INDUCED_BY_EGF	209	0.145275	2.38334	0.0019305	0.00106711	0.414
XU_RESPONSE_TO_TRETINOIN_AND_NSC682994_DN	15	0.510561	2.38223	0	0.00107382	0.414
BONCI_TARGETS_OF_MIR15A_AND_MIR16_1	88	0.217846	2.38178	0.00189036	0.00107255	0.414
GREENBAUM_E2A_TARGETS_UP	25	0.390656	2.3811	0	0.00108517	0.419
WANG_TARGETS_OF_MLL_CBP_FUSION_UP	41	0.31274	2.37946	0	0.00110561	0.427
PETROVA_ENDOTHELIUM_LYMPHATIC_VS_BLOOD_DN	147	0.168751	2.37723	0	0.00111813	0.433
TAKEDA_TARGETS_OF_NUP98_HOXA9_FUSION_3D_UP	154	0.164433	2.37577	0	0.00112469	0.436
KOKKINAKIS_METHIONINE_DEPRIVATION_48HR_UP	124	0.183543	2.37527	0	0.00112728	0.437
ZHANG_RESPONSE_TO_IKK_INHIBITOR_AND_TNF_UP	198	0.144619	2.37461	0	0.0011319	0.437
LEE_NEURAL_CREST_STEM_CELL_DN	109	0.190549	2.37288	0	0.00114861	0.442
BROWNE_HCMV_INFECTION_1HR_DN	192	0.148058	2.37139	0	0.00115895	0.445
GARGALOVIC_RESPONSE_TO_OXIDIZED_PHOSPHOLIPIDS_GREEN_DN	22	0.425474	2.36689	0	0.00119886	0.456
MASSARWEH_TAMOXIFEN_RESISTANCE_DN	221	0.133332	2.36523	0	0.00120725	0.46
ZWANG_EGF_PERSISTENTLY_UP	28	0.374114	2.36489	0	0.00120584	0.46
KOKKINAKIS_METHIONINE_DEPRIVATION_96HR_DN	71	0.233747	2.36465	0.00199203	0.00120443	0.46
MARSON_FOXP3_TARGETS_UP	63	0.249275	2.36347	0.00193424	0.00121467	0.463
APPIERTO_RESPONSE_TO_FENRETINIDE_DN	42	0.308659	2.35752	0	0.00127552	0.481
GAVIN_FOXP3_TARGETS_CLUSTER_T4	83	0.220376	2.35726	0	0.00127404	0.481
GRATIAS_RETINOBLASTOMA_16Q24	16	0.480695	2.35638	0	0.00128241	0.484
ROSS_ACUTE_MYELOID_LEUKEMIA_CBF	73	0.234127	2.354	0.00201613	0.00130431	0.489
DORN_ADENOVIRUS_INFECTION_32HR_DN	37	0.333013	2.35395	0	0.0013028	0.489
ZAMORA_NOS2_TARGETS_DN	73	0.232728	2.35251	0.00579151	0.00131105	0.49
ICHIBA_GRAFT_VERSUS_HOST_DISEASE_35D_UP	120	0.186564	2.34896	0	0.00135414	0.5
KIM_MYCN_AMPLIFICATION_TARGETS_UP	84	0.21804	2.34882	0	0.00135257	0.5
KONDO_EZH2_TARGETS	194	0.140817	2.34859	0	0.00135102	0.5
LASTOWSKA_COAMPLIFIED_WITH_MYCN	35	0.331145	2.34757	0.00203252	0.00135331	0.5
AZARE_NEOPLASTIC_TRANSFORMATION_BY_STAT3_UP	115	0.186524	2.34722	0.00195312	0.00135567	0.502
LI_INDUCED_T_TO_NATURAL_KILLER_UP	279	0.122235	2.3449	0	0.00138098	0.509
JEPSEN_SMRT_TARGETS	31	0.347043	2.34365	0	0.0013967	0.516
SCHAEFFER_SOX9_TARGETS_IN_PROSTATE_DEVELOPMENT_DN	44	0.297411	2.34365	0.00195312	0.0013951	0.516
GERHOLD_ADIPOGENESIS_DN	51	0.277251	2.3412	0	0.00141474	0.521
VETTER_TARGETS_OF_PRKCA_AND_ETS1_UP	16	0.497278	2.33966	0	0.00142082	0.523
FERRANDO_T_ALL_WITH_MLL_ENL_FUSION_DN	76	0.225404	2.33963	0.00398406	0.0014192	0.523
FIRESTEIN_PROLIFERATION	160	0.157309	2.33962	0	0.00141758	0.523
TONKS_TARGETS_OF_RUNX1_RUNX1T1_FUSION_ERYTHROCYTE_UP	136	0.173972	2.33684	0	0.00144661	0.532
CHESLER_BRAIN_HIGHEST_GENETIC_VARIANCE	32	0.348392	2.33577	0	0.00145076	0.533
SANA_TNF_SIGNALING_DN	73	0.235339	2.33508	0	0.00146436	0.537
KENNY_CTNNB1_TARGETS_DN	50	0.276525	2.33504	0	0.0014627	0.537
DAVICIONI_PAX_FOXO1_SIGNATURE_IN_ARMS_UP	56	0.269181	2.33463	0	0.00146487	0.538
LIN_APC_TARGETS	67	0.243616	2.33311	0	0.00148425	0.543
KIM_TIAL1_TARGETS	28	0.368289	2.33105	0	0.00150143	0.549
NEMETH_INFLAMMATORY_RESPONSE_LPS_UP	72	0.235046	2.33098	0	0.00149973	0.549
ADDYA_ERYTHROID_DIFFERENTIATION_BY_HEMIN	63	0.248123	2.3305	0	0.00150176	0.549
ZAMORA_NOS2_TARGETS_UP	46	0.293931	2.32853	0	0.0015301	0.554
HINATA_NFKB_TARGETS_FIBROBLAST_UP	76	0.225574	2.32713	0	0.00153593	0.556
YANG_BREAST_CANCER_ESR1_LASER_DN	44	0.296761	2.32614	0	0.00153801	0.557
COLLER_MYC_TARGETS_UP	22	0.410215	2.32398	0	0.00156791	0.562
BAE_BRCA1_TARGETS_DN	30	0.355489	2.32386	0.0019084	0.00156615	0.562
ELVIDGE_HYPOXIA_UP	157	0.161962	2.32314	0.00207469	0.00156811	0.563
TONG_INTERACT_WITH_PTTG1	46	0.284214	2.32262	0	0.00156635	0.563
BURTON_ADIPOGENESIS_3	89	0.207533	2.31908	0	0.00160033	0.569
GENTILE_UV_RESPONSE_CLUSTER_D8	35	0.326309	2.31838	0	0.00160606	0.572
SPIRA_SMOKERS_LUNG_CANCER_UP	36	0.327111	2.31623	0.00190476	0.00162675	0.58
GRAHAM_CML_DIVIDING_VS_NORMAL_QUIESCENT_UP	170	0.152153	2.31553	0.00400802	0.00163428	0.581
CHARAFE_BREAST_CANCER_BASAL_VS_MESENCHYMAL_DN	51	0.273826	2.31474	0	0.00164002	0.582
SOTIRIOU_BREAST_CANCER_GRADE_1_VS_3_UP	140	0.16962	2.31433	0	0.00164387	0.582
PARK_HSC_AND_MULTIPOTENT_PROGENITORS	35	0.321114	2.3135	0	0.0016513	0.584
DELYS_THYROID_CANCER_UP	408	0.0995916	2.30675	0	0.00175004	0.606
BONOME_OVARIAN_CANCER_POOR_SURVIVAL_UP	31	0.35438	2.30518	0	0.00176683	0.608
ELVIDGE_HYPOXIA_BY_DMOG_UP	123	0.17746	2.3038	0	0.00178165	0.612
HELLEBREKERS_SILENCED_DURING_TUMOR_ANGIOGENESIS	70	0.235916	2.30364	0.00205339	0.00178156	0.612
KIM_WT1_TARGETS_8HR_DN	108	0.18919	2.30236	0	0.00179078	0.615
GENTILE_UV_RESPONSE_CLUSTER_D7	33	0.338101	2.29756	0	0.00183878	0.624
BREDEMEYER_RAG_SIGNALING_NOT_VIA_ATM_DN	52	0.272165	2.29621	0	0.00184407	0.626
GENTILE_UV_LOW_DOSE_DN	59	0.251831	2.29267	0	0.00188271	0.636
HUMMEL_BURKITTS_LYMPHOMA_UP	37	0.321292	2.28833	0	0.00192468	0.643
NATSUME_RESPONSE_TO_INTERFERON_BETA_UP	64	0.247572	2.2878	0	0.00192795	0.643
PARK_APL_PATHOGENESIS_DN	40	0.304043	2.28737	0	0.00193131	0.643
NEMETH_INFLAMMATORY_RESPONSE_LPS_DN	28	0.359031	2.27823	0	0.0020706	0.675
WANG_PROSTATE_CANCER_ANDROGEN_INDEPENDENT	59	0.248891	2.27702	0.00203252	0.00208859	0.676
HERNANDEZ_ABERRANT_MITOSIS_BY_DOCETACEL_2NM_UP	69	0.231292	2.2751	0	0.00211743	0.682
KIM_GERMINAL_CENTER_T_HELPER_UP	56	0.256952	2.27468	0.00195312	0.00212059	0.683
AMIT_EGF_RESPONSE_120_MCF10A	40	0.300412	2.27369	0.00209205	0.00214225	0.686
GROSS_ELK3_TARGETS_UP	26	0.371785	2.27085	0.00402414	0.00219525	0.694
RIGGI_EWING_SARCOMA_PROGENITOR_UP	387	0.101836	2.27035	0.00208333	0.00220385	0.695
KIM_MYCN_AMPLIFICATION_TARGETS_DN	93	0.199869	2.26325	0	0.00231251	0.715
MORI_SMALL_PRE_BII_LYMPHOCYTE_DN	71	0.232775	2.26231	0	0.00232276	0.717
WEIGEL_OXIDATIVE_STRESS_RESPONSE	32	0.336267	2.26194	0.0019685	0.00232206	0.718
ZHONG_RESPONSE_TO_AZACITIDINE_AND_TSA_DN	61	0.244443	2.26157	0	0.00232497	0.72
PUJANA_BRCA_CENTERED_NETWORK	113	0.180539	2.2609	0.0041841	0.00232797	0.72
HAHTOLA_CTCL_CUTANEOUS	22	0.407874	2.26082	0.00197628	0.00232545	0.72
FARMER_BREAST_CANCER_CLUSTER_5	18	0.434921	2.25697	0	0.00238617	0.726
ROSS_AML_WITH_PML_RARA_FUSION	75	0.223756	2.25508	0.00191939	0.00242697	0.733
LUI_THYROID_CANCER_CLUSTER_1	48	0.274585	2.25468	0	0.00242977	0.733
CROONQUIST_NRAS_VS_STROMAL_STIMULATION_DN	88	0.205774	2.25197	0.00196078	0.00247574	0.741
HEIDENBLAD_AMPLICON_12P11_12_UP	36	0.312497	2.24734	0.00193424	0.00255293	0.748
BOYLAN_MULTIPLE_MYELOMA_D_CLUSTER_DN	34	0.334122	2.24728	0.00197628	0.00255018	0.748
JIANG_TIP30_TARGETS_UP	42	0.293638	2.24599	0	0.00256876	0.75
XU_GH1_AUTOCRINE_TARGETS_UP	158	0.152115	2.24578	0.00211416	0.00256963	0.751
KOBAYASHI_EGFR_SIGNALING_24HR_UP	77	0.211165	2.24317	0	0.00260482	0.758
CHIBA_RESPONSE_TO_TSA	38	0.308358	2.24238	0.00606061	0.00261098	0.759
DASU_IL6_SIGNALING_UP	55	0.260084	2.24188	0	0.0026154	0.761
BURTON_ADIPOGENESIS_PEAK_AT_0HR	58	0.248126	2.24043	0	0.00263214	0.766
GENTILE_UV_RESPONSE_CLUSTER_D2	35	0.312129	2.23804	0	0.00265967	0.77
LEE_LIVER_CANCER_MYC_UP	51	0.263044	2.23058	0.00201207	0.00280402	0.79
MELLMAN_TUT1_TARGETS_UP	19	0.430035	2.22996	0	0.00281185	0.791
XU_CREBBP_TARGETS_DN	35	0.321458	2.22875	0	0.00282693	0.794
LUI_THYROID_CANCER_PAX8_PPARG_UP	39	0.30421	2.22746	0.00199601	0.00285046	0.798
MARIADASON_REGULATED_BY_HISTONE_ACETYLATION_UP	55	0.250389	2.22445	0	0.002917	0.804
MANALO_HYPOXIA_UP	193	0.137693	2.22341	0.00201613	0.00293353	0.807
LIM_MAMMARY_LUMINAL_MATURE_DN	92	0.197478	2.22261	0	0.00294107	0.808
BROWNE_HCMV_INFECTION_24HR_DN	131	0.167049	2.21764	0	0.00302875	0.82
SHETH_LIVER_CANCER_VS_TXNIP_LOSS_PAM2	155	0.153803	2.21647	0.00429185	0.00306104	0.823
KAYO_AGING_MUSCLE_UP	208	0.133653	2.21524	0	0.00308426	0.827
NAKAYAMA_FRA2_TARGETS	39	0.298215	2.21458	0	0.00308631	0.827
BURTON_ADIPOGENESIS_PEAK_AT_24HR	42	0.292731	2.21223	0.00198807	0.00312503	0.835
FERREIRA_EWINGS_SARCOMA_UNSTABLE_VS_STABLE_UP	145	0.15543	2.21139	0.00187266	0.00314125	0.835
LEE_AGING_MUSCLE_UP	34	0.31844	2.20978	0	0.00317679	0.837
NAKAMURA_ADIPOGENESIS_EARLY_UP	52	0.261042	2.20959	0.0059761	0.00317345	0.837
RODWELL_AGING_KIDNEY_NO_BLOOD_UP	198	0.137714	2.20951	0.00204918	0.00317011	0.837
ZHAN_MULTIPLE_MYELOMA_SUBGROUPS	30	0.332959	2.2095	0.00183824	0.00316679	0.837
BURTON_ADIPOGENESIS_7	43	0.280257	2.20535	0	0.00325336	0.844
ZHU_CMV_8_HR_DN	44	0.276914	2.20376	0.00200401	0.00330078	0.849
BARRIER_COLON_CANCER_RECURRENCE_UP	39	0.299216	2.20341	0.00201207	0.00329912	0.849
CASORELLI_ACUTE_PROMYELOCYTIC_LEUKEMIA_UP	139	0.163313	2.20232	0.00192308	0.00330973	0.85
BOYLAN_MULTIPLE_MYELOMA_PCA3_UP	71	0.217926	2.19934	0.00401606	0.00336715	0.858
BROWNE_HCMV_INFECTION_16HR_DN	70	0.218506	2.19611	0.002	0.00341997	0.867
LIU_NASOPHARYNGEAL_CARCINOMA	60	0.242805	2.19525	0.00207039	0.00342859	0.868
SOTIRIOU_BREAST_CANCER_GRADE_1_VS_3_DN	47	0.268217	2.19345	0	0.00346863	0.87
KAMMINGA_SENESCENCE	39	0.30372	2.19037	0.00204499	0.00353263	0.873
GRABARCZYK_BCL11B_TARGETS_DN	57	0.247558	2.18976	0.00211864	0.0035411	0.873
WOO_LIVER_CANCER_RECURRENCE_UP	98	0.18511	2.1883	0	0.00356366	0.874
AMIT_EGF_RESPONSE_240_MCF10A	20	0.410886	2.18693	0.00201207	0.00358945	0.874
WENG_POR_TARGETS_LIVER_UP	33	0.321249	2.18608	0	0.00359453	0.874
IWANAGA_CARCINOGENESIS_BY_KRAS_PTEN_UP	167	0.14353	2.18421	0.00407332	0.00363079	0.88
HESS_TARGETS_OF_HOXA9_AND_MEIS1_UP	65	0.231569	2.18407	0	0.00363225	0.881
HARRIS_HYPOXIA	74	0.214972	2.18353	0	0.00364244	0.881
BARIS_THYROID_CANCER_UP	23	0.378765	2.18279	0.00376648	0.00367134	0.882
MANN_RESPONSE_TO_AMIFOSTINE_UP	18	0.432205	2.18277	0.00397614	0.00366756	0.882
BILD_CTNNB1_ONCOGENIC_SIGNATURE	68	0.223774	2.18234	0	0.00367397	0.882
OSWALD_HEMATOPOIETIC_STEM_CELL_IN_COLLAGEN_GEL_UP	204	0.132421	2.17997	0.00202429	0.00371492	0.886
VALK_AML_CLUSTER_11	37	0.299673	2.17997	0.00204499	0.00371111	0.886
GAVIN_FOXP3_TARGETS_CLUSTER_P7	83	0.200865	2.17552	0.00573614	0.00382052	0.899
DANG_MYC_TARGETS_DN	31	0.332352	2.17454	0.00197628	0.00384232	0.901
BILANGES_RAPAMYCIN_SENSITIVE_GENES	36	0.307155	2.17451	0	0.00383839	0.901
DAZARD_RESPONSE_TO_UV_NHEK_UP	194	0.13066	2.17443	0	0.00383616	0.901
GAUSSMANN_MLL_AF4_FUSION_TARGETS_E_UP	91	0.192804	2.1744	0.00196464	0.00383224	0.901
DER_IFN_ALPHA_RESPONSE_UP	62	0.232466	2.17412	0.00204499	0.00383362	0.901
SUH_COEXPRESSED_WITH_ID1_AND_ID2_UP	18	0.423629	2.17354	0	0.00385197	0.902
PETRETTO_HEART_MASS_QTL_CIS_UP	27	0.34685	2.17188	0	0.00388743	0.903
BROWN_MYELOID_CELL_DEVELOPMENT_UP	140	0.155418	2.16851	0.00210526	0.00395318	0.903
MARTINEZ_RESPONSE_TO_TRABECTEDIN	48	0.26085	2.16764	0.00412371	0.00396609	0.906
FLECHNER_BIOPSY_KIDNEY_TRANSPLANT_OK_VS_DONOR_DN	22	0.386102	2.16554	0.00559702	0.00400436	0.909
BHATI_G2M_ARREST_BY_2METHOXYESTRADIOL_UP	104	0.182416	2.16377	0.00426439	0.00404426	0.912
GAUSSMANN_MLL_AF4_FUSION_TARGETS_F_UP	164	0.145855	2.16039	0	0.00413379	0.919
CAFFAREL_RESPONSE_TO_THC_24HR_5_DN	48	0.260528	2.15871	0.00392157	0.00418745	0.921
MORI_MATURE_B_LYMPHOCYTE_DN	71	0.218424	2.15393	0.00206186	0.00434107	0.928
STARK_HYPPOCAMPUS_22Q11_DELETION_DN	18	0.414842	2.15162	0	0.00441108	0.931
ZHOU_INFLAMMATORY_RESPONSE_LIVE_UP	383	0.0966951	2.1512	0.00402414	0.0044167	0.931
ZHENG_FOXP3_TARGETS_IN_T_LYMPHOCYTE_DN	35	0.31179	2.14638	0.00422833	0.00453205	0.934
ROZANOV_MMP14_TARGETS_UP	236	0.121982	2.14366	0	0.00460672	0.938
MORI_PRE_BI_LYMPHOCYTE_DN	72	0.21532	2.14001	0.00390625	0.00470654	0.941
JAZAERI_BREAST_CANCER_BRCA1_VS_BRCA2_UP	46	0.263564	2.13974	0.00195312	0.00470696	0.942
HASLINGER_B_CLL_WITH_11Q23_DELETION	22	0.376706	2.13893	0.0038835	0.00473078	0.943
MAGRANGEAS_MULTIPLE_MYELOMA_IGG_VS_IGA_UP	17	0.441976	2.13791	0.00428265	0.00474781	0.943
DING_LUNG_CANCER_MUTATED_SIGNIFICANTLY	25	0.358443	2.1369	0.00375235	0.00476989	0.944
GENTILE_RESPONSE_CLUSTER_D3	51	0.249868	2.1346	0.00193798	0.00483243	0.947
CHOW_RASSF1_TARGETS_DN	30	0.329057	2.13358	0.00389864	0.00486272	0.95
GAZDA_DIAMOND_BLACKFAN_ANEMIA_MYELOID_DN	30	0.328298	2.13353	0.0019802	0.00485952	0.95
EPPERT_LSC_R	35	0.301556	2.13169	0	0.00492512	0.954
KORKOLA_EMBRYONAL_CARCINOMA_UP	39	0.293739	2.13165	0.00199601	0.00492684	0.954
RICKMAN_TUMOR_DIFFERENTIATED_MODERATELY_VS_POORLY_UP	113	0.174113	2.13112	0	0.00493526	0.954
DORN_ADENOVIRUS_INFECTION_48HR_DN	38	0.286718	2.13017	0.004	0.00494881	0.955
GARGALOVIC_RESPONSE_TO_OXIDIZED_PHOSPHOLIPIDS_CYAN_UP	17	0.43327	2.12882	0.0019084	0.00499708	0.956
HASLINGER_B_CLL_WITH_CHROMOSOME_12_TRISOMY	22	0.377014	2.12823	0.00408998	0.00501039	0.956
BROWNE_HCMV_INFECTION_10HR_UP	81	0.203256	2.12701	0	0.00504868	0.956
PLASARI_TGFB1_TARGETS_10HR_UP	186	0.135202	2.12607	0.00618557	0.00507183	0.958
ZHAN_MULTIPLE_MYELOMA_MS_DN	38	0.285588	2.12411	0.00400802	0.00513485	0.959
CHEMNITZ_RESPONSE_TO_PROSTAGLANDIN_E2_DN	330	0.0993969	2.12357	0.00402414	0.00513634	0.959
BECKER_TAMOXIFEN_RESISTANCE_UP	49	0.258312	2.12188	0.00396825	0.00517906	0.96
LEE_CALORIE_RESTRICTION_NEOCORTEX_DN	56	0.239148	2.12186	0.00197628	0.00517567	0.96
LANG_MYB_FAMILY_TARGETS	28	0.336829	2.12099	0.00378788	0.0051887	0.96
MYLLYKANGAS_AMPLIFICATION_HOT_SPOT_23	19	0.402094	2.12079	0	0.00518852	0.96
KESHELAVA_MULTIPLE_DRUG_RESISTANCE	66	0.221865	2.12033	0.00200401	0.0052084	0.961
LIU_PROSTATE_CANCER_UP	86	0.190109	2.11981	0.00591716	0.00521321	0.962
BROWNE_HCMV_INFECTION_4HR_UP	44	0.271262	2.11747	0	0.00530551	0.964
ROYLANCE_BREAST_CANCER_16Q_COPY_NUMBER_UP	53	0.24831	2.11605	0.0040404	0.00534467	0.966
HOLLEMAN_PREDNISOLONE_RESISTANCE_ALL_UP	16	0.443218	2.1151	0.00606061	0.00536743	0.966
BURTON_ADIPOGENESIS_12	26	0.351504	2.11493	0.00191571	0.00536719	0.966
BALDWIN_PRKCI_TARGETS_UP	35	0.304964	2.11409	0.00594059	0.0053849	0.966
SMIRNOV_RESPONSE_TO_IR_2HR_DN	49	0.254581	2.10801	0.0039604	0.00560551	0.967
TSENG_IRS1_TARGETS_DN	123	0.161703	2.10739	0.00197239	0.00563115	0.968
JOHNSTONE_PARVB_TARGETS_1_DN	51	0.250823	2.107	0.008	0.00563854	0.968
PEDRIOLI_MIR31_TARGETS_DN	352	0.0951442	2.10689	0.00203252	0.00563631	0.968
LEE_CALORIE_RESTRICTION_MUSCLE_DN	40	0.278306	2.1054	0	0.00567155	0.969
KIM_PTEN_TARGETS_UP	18	0.415527	2.10123	0.00784314	0.00580114	0.972
HOLLEMAN_ASPARAGINASE_RESISTANCE_ALL_DN	22	0.376944	2.10016	0.0039604	0.00583795	0.973
BILANGES_SERUM_SENSITIVE_GENES	76	0.211296	2.09684	0.0021097	0.00596106	0.976
CHANGOLKAR_H2AFY_TARGETS_DN	36	0.29171	2.09593	0	0.00598616	0.976
ZHAN_V2_LATE_DIFFERENTIATION_GENES	40	0.285759	2.09452	0.00580271	0.00603224	0.977
FOSTER_TOLERANT_MACROPHAGE_UP	150	0.143654	2.09247	0.0040568	0.00611907	0.98
BOYAULT_LIVER_CANCER_SUBCLASS_G1_UP	104	0.174629	2.09245	0	0.00611315	0.98
BHAT_ESR1_TARGETS_NOT_VIA_AKT1_UP	203	0.125806	2.08798	0	0.00628217	0.982
ROSS_AML_WITH_MLL_FUSIONS	68	0.214889	2.08451	0	0.00640551	0.984
MOSERLE_IFNA_RESPONSE	22	0.376854	2.08428	0.00420168	0.0064058	0.984
GALLUZZI_PERMEABILIZE_MITOCHONDRIA	39	0.281999	2.08419	0.00621118	0.00640446	0.984
BARRIER_COLON_CANCER_RECURRENCE_DN	16	0.449663	2.08393	0	0.00640486	0.984
BROWNE_HCMV_INFECTION_20HR_DN	86	0.187327	2.08293	0.00606061	0.00644869	0.984
PETROVA_ENDOTHELIUM_LYMPHATIC_VS_BLOOD_UP	122	0.16171	2.08195	0.002	0.00647303	0.984
MATTIOLI_MULTIPLE_MYELOMA_WITH_14Q32_TRANSLOCATIONS	32	0.314445	2.0807	0	0.00652938	0.984
ZHAN_MULTIPLE_MYELOMA_LB_DN	33	0.30147	2.07784	0.00426439	0.00664172	0.987
WESTON_VEGFA_TARGETS_3HR	65	0.210583	2.07745	0.00389864	0.00664636	0.987
IIZUKA_LIVER_CANCER_PROGRESSION_L1_G1_UP	16	0.432231	2.076	0.00200803	0.00670583	0.987
MCCLUNG_CREB1_TARGETS_DN	50	0.251827	2.0758	0.00607287	0.00670899	0.987
PHONG_TNF_RESPONSE_VIA_P38_PARTIAL	154	0.143565	2.0749	0.00210526	0.00673953	0.987
KAYO_CALORIE_RESTRICTION_MUSCLE_UP	87	0.188718	2.07218	0.002	0.00683514	0.987
SHAFFER_IRF4_TARGETS_IN_ACTIVATED_DENDRITIC_CELL	59	0.226134	2.06878	0	0.00697079	0.989
DIRMEIER_LMP1_RESPONSE_LATE_UP	50	0.251421	2.06784	0.00814664	0.00699282	0.99
DAVIES_MULTIPLE_MYELOMA_VS_MGUS_DN	25	0.347645	2.06472	0.00197239	0.0071143	0.991
SHETH_LIVER_CANCER_VS_TXNIP_LOSS_PAM6	49	0.250697	2.06292	0.00191939	0.00718573	0.991
NAKAYAMA_SOFT_TISSUE_TUMORS_PCA2_UP	80	0.194402	2.062	0	0.00722036	0.991
HOELZEL_NF1_TARGETS_DN	106	0.174861	2.06078	0.00409836	0.00727697	0.993
RADMACHER_AML_PROGNOSIS	75	0.204	2.05885	0	0.00734962	0.993
AKL_HTLV1_INFECTION_DN	64	0.220446	2.05824	0.00423729	0.0073712	0.993
NAKAMURA_CANCER_MICROENVIRONMENT_DN	41	0.27118	2.05401	0.00798403	0.00754839	0.993
AFFAR_YY1_TARGETS_DN	227	0.115394	2.05356	0.00390625	0.00756497	0.993
RUIZ_TNC_TARGETS_DN	135	0.151474	2.05351	0.00406504	0.00756104	0.993
SHEDDEN_LUNG_CANCER_GOOD_SURVIVAL_A5	59	0.230218	2.05245	0.00782779	0.00760602	0.993
CROMER_METASTASIS_DN	71	0.207942	2.0482	0.00767754	0.0078045	0.995
MENSE_HYPOXIA_UP	90	0.184062	2.04742	0.00607287	0.00784592	0.995
DAVICIONI_TARGETS_OF_PAX_FOXO1_FUSIONS_DN	64	0.214551	2.04695	0.00840336	0.00786358	0.995
LAMB_CCND1_TARGETS	20	0.383296	2.04662	0.00795229	0.00787842	0.995
CAIRO_PML_TARGETS_BOUND_BY_MYC_UP	21	0.371144	2.04629	0.00196464	0.00788672	0.995
FRASOR_TAMOXIFEN_RESPONSE_UP	46	0.25263	2.04623	0	0.00788087	0.995
MORI_PRE_BI_LYMPHOCYTE_UP	75	0.199312	2.04274	0.00402414	0.00803262	0.996
WAKABAYASHI_ADIPOGENESIS_PPARG_BOUND_36HR	27	0.334834	2.04258	0.00398406	0.00803135	0.996
YU_MYC_TARGETS_UP	40	0.269374	2.04161	0.00386847	0.00807227	0.996
SYED_ESTRADIOL_RESPONSE	18	0.399361	2.03833	0.00397614	0.00822745	0.996
NAGASHIMA_NRG1_SIGNALING_UP	164	0.139412	2.03628	0.00203666	0.00830715	0.996
GAVIN_FOXP3_TARGETS_CLUSTER_P6	86	0.184669	2.03336	0.00408998	0.0084134	0.996
POMEROY_MEDULLOBLASTOMA_DESMOPLASIC_VS_CLASSIC_DN	58	0.225105	2.03302	0.00196078	0.00842588	0.996
HEDENFALK_BREAST_CANCER_BRACX_DN	20	0.374911	2.03296	0.00596422	0.00842123	0.996
BURTON_ADIPOGENESIS_10	27	0.327242	2.03228	0.00582524	0.00844632	0.997
STEARMAN_TUMOR_FIELD_EFFECT_UP	30	0.309868	2.03084	0	0.00850362	0.997
RHEIN_ALL_GLUCOCORTICOID_THERAPY_UP	61	0.219615	2.03042	0.00194553	0.00851608	0.997
DUTERTRE_ESTRADIOL_RESPONSE_6HR_UP	216	0.119582	2.03041	0.0078125	0.00850818	0.997
SILIGAN_TARGETS_OF_EWS_FLI1_FUSION_DN	17	0.403733	2.02834	0.00199203	0.00862287	0.998
BROWNE_HCMV_INFECTION_18HR_DN	162	0.135086	2.02359	0.00606061	0.00883808	0.998
ROVERSI_GLIOMA_COPY_NUMBER_UP	86	0.181922	2.0218	0.0127119	0.00893062	0.998
BIDUS_METASTASIS_DN	128	0.154153	2.02055	0.00819672	0.0089879	0.998
IKEDA_MIR30_TARGETS_DN	22	0.360144	2.02039	0.00389105	0.00898894	0.998
DELPUECH_FOXO3_TARGETS_UP	59	0.22439	2.01958	0	0.00901298	0.999
ROESSLER_LIVER_CANCER_METASTASIS_DN	45	0.258095	2.01931	0	0.00902007	0.999
CHANGOLKAR_H2AFY_TARGETS_UP	45	0.254097	2.01879	0.00394477	0.00903486	0.999
LE_NEURONAL_DIFFERENTIATION_UP	17	0.400064	2.01543	0.0020202	0.00922097	0.999
CAIRO_HEPATOBLASTOMA_CLASSES_DN	191	0.124731	2.01328	0.00205761	0.00931879	0.999
HU_GENOTOXIC_DAMAGE_4HR	31	0.303787	2.01248	0.00587084	0.0093438	0.999
NICK_RESPONSE_TO_PROC_TREATMENT_DN	20	0.3781	2.01237	0.00788955	0.00934145	0.999
SHEDDEN_LUNG_CANCER_GOOD_SURVIVAL_A4	176	0.128657	2.01168	0.00207039	0.00936983	0.999
RADAEVA_RESPONSE_TO_IFNA1_UP	41	0.264186	2.01057	0	0.00942264	1
KYNG_ENVIRONMENTAL_STRESS_RESPONSE_NOT_BY_GAMMA_IN_WS	27	0.319601	2.00985	0.00397614	0.00945075	1
FAELT_B_CLL_WITH_VH_REARRANGEMENTS_UP	46	0.248098	2.0087	0.00197628	0.00949438	1
LI_WILMS_TUMOR_ANAPLASTIC_UP	17	0.400736	2.00747	0.00391389	0.00955116	1
VERHAAK_AML_WITH_NPM1_MUTATED_DN	223	0.112872	2.00622	0.014	0.00961743	1
LANDIS_ERBB2_BREAST_TUMORS_65_UP	22	0.357505	2.00573	0.0039604	0.00963911	1
TONKS_TARGETS_OF_RUNX1_RUNX1T1_FUSION_GRANULOCYTE_UP	50	0.243451	2.00265	0.00400802	0.00981363	1
HUANG_DASATINIB_RESISTANCE_DN	66	0.216075	2.00053	0.00195695	0.00992696	1
GRADE_COLON_VS_RECTAL_CANCER_DN	48	0.246034	1.99389	0.00199601	0.0103262	1
MARCHINI_TRABECTEDIN_RESISTANCE_DN	43	0.259446	1.99244	0.00744879	0.010408	1
BILD_HRAS_ONCOGENIC_SIGNATURE	224	0.112898	1.98928	0.00829876	0.0105703	1
SERVITJA_LIVER_HNF1A_TARGETS_UP	126	0.15254	1.98861	0.00387597	0.0105941	1
SESTO_RESPONSE_TO_UV_C7	62	0.21363	1.98835	0.00609756	0.0105996	1
KYNG_ENVIRONMENTAL_STRESS_RESPONSE_NOT_BY_UV_IN_OLD	20	0.372006	1.98703	0.0060241	0.0106608	1
NIKOLSKY_BREAST_CANCER_12Q13_Q21_AMPLICON	39	0.270649	1.98546	0.00423729	0.0107738	1
WHITFIELD_CELL_CYCLE_G2	155	0.139299	1.98458	0.00572519	0.0108478	1
MARTIN_VIRAL_GPCR_SIGNALING_DN	42	0.260346	1.98402	0.00793651	0.0108805	1
ZHAN_MULTIPLE_MYELOMA_CD2_DN	41	0.260723	1.98159	0.00399202	0.011007	1
FIGUEROA_AML_METHYLATION_CLUSTER_4_UP	96	0.173934	1.98143	0.0040404	0.0110016	1
BASSO_HAIRY_CELL_LEUKEMIA_UP	73	0.193961	1.98101	0.00582524	0.0110236	1
RODRIGUES_NTN1_TARGETS_DN	145	0.141644	1.98066	0	0.0110424	1
BERENJENO_TRANSFORMED_BY_RHOA_FOREVER_DN	28	0.311597	1.97979	0.00383142	0.0110806	1
RIZKI_TUMOR_INVASIVENESS_2D_DN	57	0.222961	1.97628	0.00403226	0.0113041	1
SHI_SPARC_TARGETS_UP	23	0.340438	1.97365	0.00561798	0.011449	1
BROWNE_INTERFERON_RESPONSIVE_GENES	56	0.226647	1.97209	0.00994036	0.0115441	1
RIZ_ERYTHROID_DIFFERENTIATION_CCNE1	40	0.266275	1.96862	0.00570342	0.0117485	1
CHEOK_RESPONSE_TO_HD_MTX_DN	20	0.371677	1.96861	0.00974659	0.011738	1
HUNSBERGER_EXERCISE_REGULATED_GENES	31	0.297699	1.9679	0.0020202	0.0117799	1
JIANG_HYPOXIA_CANCER	55	0.231547	1.96788	0.00408998	0.0117693	1
HENDRICKS_SMARCA4_TARGETS_UP	44	0.241346	1.96655	0.00403226	0.0118741	1
RODRIGUES_THYROID_CARCINOMA_DN	70	0.194356	1.96447	0.00959693	0.0120129	1
KRASNOSELSKAYA_ILF3_TARGETS_DN	43	0.255243	1.96352	0.0040404	0.0120512	1
HOWLIN_CITED1_TARGETS_1_DN	34	0.28197	1.96269	0.00204918	0.0120944	1
BURTON_ADIPOGENESIS_PEAK_AT_2HR	44	0.245046	1.96228	0	0.0121087	1
KORKOLA_YOLK_SAC_TUMOR_UP	19	0.377945	1.96194	0.00608519	0.0121265	1
ROESSLER_LIVER_CANCER_METASTASIS_UP	102	0.167045	1.96179	0	0.0121247	1
BOYAULT_LIVER_CANCER_SUBCLASS_G6_UP	59	0.218124	1.96137	0.00576923	0.0121481	1
MORI_LARGE_PRE_BII_LYMPHOCYTE_DN	51	0.230463	1.95842	0.00772201	0.0123068	1
AMIT_EGF_RESPONSE_40_HELA	42	0.252251	1.95679	0.00404858	0.0124222	1
GYORFFY_MITOXANTRONE_RESISTANCE	32	0.290413	1.95668	0.00782779	0.0124201	1
MCCLUNG_COCAIN_REWARD_4WK	64	0.207782	1.95521	0.0039604	0.0125277	1
TERAMOTO_OPN_TARGETS_CLUSTER_6	26	0.317721	1.95521	0.00408163	0.0125167	1
MALONEY_RESPONSE_TO_17AAG_UP	35	0.273211	1.95425	0.0100402	0.0125734	1
HOOI_ST7_TARGETS_UP	79	0.18614	1.954	0.008	0.012574	1
TONKS_TARGETS_OF_RUNX1_RUNX1T1_FUSION_SUSTAINED_IN_MONOCYTE_UP	21	0.352854	1.95126	0.0087146	0.0127756	1
WILENSKY_RESPONSE_TO_DARAPLADIB	26	0.328341	1.95079	0.00806452	0.0128055	1
MORI_IMMATURE_B_LYMPHOCYTE_DN	86	0.1784	1.9501	0.0139721	0.0128251	1
ZHAN_MULTIPLE_MYELOMA_LB_UP	42	0.253749	1.94921	0.00764818	0.0128712	1
DELLA_RESPONSE_TO_TSA_AND_BUTYRATE	21	0.356517	1.94856	0.0111111	0.0128968	1
VANTVEER_BREAST_CANCER_POOR_PROGNOSIS	53	0.23127	1.94797	0.0104603	0.0129266	1
IIZUKA_LIVER_CANCER_PROGRESSION_G2_G3_UP	25	0.322165	1.94659	0.00804829	0.0130155	1
ELVIDGE_HIF1A_AND_HIF2A_TARGETS_UP	38	0.269438	1.94546	0.00574713	0.0130933	1
FRASOR_RESPONSE_TO_ESTRADIOL_DN	71	0.196896	1.93864	0.0120482	0.0136352	1
TERAO_AOX4_TARGETS_SKIN_UP	29	0.301123	1.93784	0.0100402	0.0136892	1
STONER_ESOPHAGEAL_CARCINOGENESIS_UP	35	0.27648	1.9365	0	0.0137976	1
TURASHVILI_BREAST_NORMAL_DUCTAL_VS_LOBULAR_UP	56	0.216333	1.93573	0.00596422	0.0138441	1
LOPEZ_MBD_TARGETS_IMPRINTED_AND_X_LINKED	17	0.392455	1.93443	0.00787402	0.0139257	1
CHOW_RASSF1_TARGETS_UP	23	0.33461	1.93365	0.00591716	0.0139731	1
SMID_BREAST_CANCER_RELAPSE_IN_BONE_DN	274	0.0986325	1.93287	0.00784314	0.0140135	1
ACOSTA_PROLIFERATION_INDEPENDENT_MYC_TARGETS_DN	106	0.159235	1.93115	0.00826446	0.0141585	1
WANG_RECURRENT_LIVER_CANCER_UP	19	0.360838	1.93058	0.00588235	0.0142001	1
MEISSNER_ES_ICP_WITH_H3K4ME3	28	0.306112	1.92919	0.0156863	0.0142999	1
KOBAYASHI_RESPONSE_TO_ROMIDEPSIN	17	0.391327	1.9266	0.0132075	0.0145213	1
SCHEIDEREIT_IKK_TARGETS	17	0.386285	1.92295	0.0104822	0.0148311	1
LEE_METASTASIS_AND_RNA_PROCESSING_UP	16	0.40703	1.92144	0.00608519	0.0149341	1
YANG_BREAST_CANCER_ESR1_BULK_UP	24	0.33414	1.92075	0.00201207	0.0149868	1
NIKOLSKY_BREAST_CANCER_8Q12_Q22_AMPLICON	119	0.148317	1.91992	0.00383877	0.0150361	1
KIM_GASTRIC_CANCER_CHEMOSENSITIVITY	85	0.175386	1.91681	0.0124224	0.0153312	1
XU_CREBBP_TARGETS_UP	20	0.358703	1.91665	0.00407332	0.0153298	1
ASGHARZADEH_NEUROBLASTOMA_POOR_SURVIVAL_DN	35	0.274296	1.91563	0.00843882	0.0154048	1
GAVIN_FOXP3_TARGETS_CLUSTER_P3	153	0.131401	1.91528	0.00828157	0.0154205	1
GROSS_HYPOXIA_VIA_ELK3_ONLY_DN	43	0.246813	1.91435	0.00207039	0.0154934	1
AIYAR_COBRA1_TARGETS_DN	24	0.326031	1.91411	0.00562852	0.0155018	1
IZADPANAH_STEM_CELL_ADIPOSE_VS_BONE_DN	103	0.163431	1.91397	0.00824742	0.0155014	1
GERHOLD_ADIPOGENESIS_UP	45	0.246258	1.91368	0.0101215	0.0155097	1
FERRANDO_LYL1_NEIGHBORS	15	0.401399	1.91338	0.00207039	0.0155251	1
MA_MYELOID_DIFFERENTIATION_UP	36	0.262404	1.91301	0.00798403	0.0155289	1
VERRECCHIA_EARLY_RESPONSE_TO_TGFB1	53	0.219413	1.91173	0.0120482	0.0156361	1
SANA_TNF_SIGNALING_UP	68	0.195833	1.91048	0.00192678	0.0157371	1
SHEPARD_BMYB_TARGETS	73	0.19035	1.90949	0.00998004	0.0158267	1
RHODES_UNDIFFERENTIATED_CANCER	63	0.202606	1.90905	0.00409836	0.0158591	1
FALVELLA_SMOKERS_WITH_LUNG_CANCER	73	0.190883	1.90805	0.0140845	0.0159368	1
DELPUECH_FOXO3_TARGETS_DN	34	0.27617	1.90675	0.00833333	0.0160359	1
CAMPS_COLON_CANCER_COPY_NUMBER_UP	76	0.184052	1.90578	0.00578035	0.0161163	1
VERNELL_RETINOBLASTOMA_PATHWAY_DN	17	0.390262	1.9054	0.00996016	0.0161382	1
AZARE_STAT3_TARGETS	23	0.330107	1.90426	0.00833333	0.0162314	1
MCCABE_HOXC6_TARGETS_CANCER_DN	19	0.362869	1.90275	0.00198413	0.0163758	1
AMIT_DELAYED_EARLY_GENES	18	0.37516	1.90133	0.00208768	0.0164955	1
ZHAN_MULTIPLE_MYELOMA_PR_DN	47	0.233486	1.89969	0.0102041	0.0166337	1
HAHTOLA_MYCOSIS_FUNGOIDES_SKIN_DN	25	0.314098	1.89885	0.00796813	0.016692	1
BILANGES_SERUM_SENSITIVE_VIA_TSC2	26	0.309907	1.8986	0.00821355	0.0166992	1
REICHERT_MITOSIS_LIN9_TARGETS	27	0.30333	1.89835	0.0119048	0.016712	1
TOMLINS_PROSTATE_CANCER_DN	35	0.271989	1.89597	0.00957854	0.0168891	1
BEGUM_TARGETS_OF_PAX3_FOXO1_FUSION_UP	55	0.210128	1.89576	0.00614754	0.0168904	1
BOSCO_INTERFERON_INDUCED_ANTIVIRAL_MODULE	64	0.199233	1.8953	0.00643777	0.0169057	1
OZEN_MIR125B1_TARGETS	20	0.355033	1.89506	0.00608519	0.016921	1
NAM_FXYD5_TARGETS_DN	18	0.370571	1.89414	0.015534	0.0169799	1
BROWNE_HCMV_INFECTION_2HR_DN	46	0.235991	1.89389	0.00411523	0.0169953	1
FONTAINE_FOLLICULAR_THYROID_ADENOMA_DN	60	0.205804	1.89353	0.0134357	0.0170091	1
RIZKI_TUMOR_INVASIVENESS_2D_UP	62	0.203826	1.89204	0.0125261	0.0171408	1
POMEROY_MEDULLOBLASTOMA_PROGNOSIS_DN	41	0.251732	1.89143	0.00200803	0.0171824	1
NAKAMURA_METASTASIS	43	0.246219	1.89073	0.0142566	0.0172256	1
CHIARADONNA_NEOPLASTIC_TRANSFORMATION_KRAS_DN	133	0.141541	1.88963	0.00428265	0.0173096	1
FUJII_YBX1_TARGETS_DN	184	0.122618	1.88948	0.0119284	0.0173105	1
BACOLOD_RESISTANCE_TO_ALKYLATING_AGENTS_UP	16	0.397183	1.88932	0.01566	0.0173046	1
HORTON_SREBF_TARGETS	23	0.33119	1.88856	0.0123457	0.0173686	1
CROONQUIST_IL6_DEPRIVATION_DN	92	0.171224	1.88853	0.0152838	0.0173568	1
BOYLAN_MULTIPLE_MYELOMA_C_DN	53	0.219335	1.88618	0.016	0.0175716	1
MCDOWELL_ACUTE_LUNG_INJURY_DN	41	0.251404	1.8816	0.0168421	0.0180071	1
BROWNE_HCMV_INFECTION_30MIN_DN	122	0.144857	1.87921	0.00823045	0.0182332	1
HAHTOLA_MYCOSIS_FUNGOIDES_CD4_UP	57	0.212606	1.87779	0.0185567	0.0183787	1
ZHAN_MULTIPLE_MYELOMA_CD1_VS_CD2_UP	61	0.204268	1.87772	0.00585938	0.0183661	1
LIANG_HEMATOPOIESIS_STEM_CELL_NUMBER_SMALL_VS_HUGE_UP	34	0.268076	1.87409	0.015873	0.0187418	1
CUI_TCF21_TARGETS_DN	28	0.302455	1.874	0.0163934	0.0187374	1
KYNG_DNA_DAMAGE_BY_4NQO	30	0.286863	1.87355	0.0121457	0.0187815	1
CHEN_HOXA5_TARGETS_9HR_DN	38	0.255613	1.87157	0.00816326	0.0189525	1
LIN_MELANOMA_COPY_NUMBER_UP	65	0.196832	1.87002	0.0132325	0.0191091	1
JIANG_HYPOXIA_VIA_VHL	17	0.384421	1.86921	0.00998004	0.0191863	1
KANNAN_TP53_TARGETS_DN	22	0.332088	1.86803	0.0163599	0.0192758	1
KONDO_COLON_CANCER_HCP_WITH_H3K27ME1	23	0.326219	1.86704	0.0140281	0.0193651	1
HOLLEMAN_VINCRISTINE_RESISTANCE_B_ALL_UP	34	0.268375	1.86701	0.0161943	0.0193547	1
WANG_ESOPHAGUS_CANCER_VS_NORMAL_UP	111	0.153675	1.86695	0.00639659	0.0193443	1
CHEN_LIVER_METABOLISM_QTL_CIS	86	0.174757	1.86353	0.0138614	0.0196946	1
HENDRICKS_SMARCA4_TARGETS_DN	45	0.23105	1.86332	0.00779727	0.0197017	1
GENTILE_UV_RESPONSE_CLUSTER_D9	22	0.33325	1.86139	0.00840336	0.0198962	1
BOYLAN_MULTIPLE_MYELOMA_D_DN	71	0.187937	1.85971	0.0125	0.0200587	1
ROVERSI_GLIOMA_COPY_NUMBER_DN	47	0.227232	1.85898	0.004158	0.0201253	1
HERNANDEZ_ABERRANT_MITOSIS_BY_DOCETACEL_2NM_DN	22	0.327484	1.85894	0.00792079	0.020113	1
BOYAULT_LIVER_CANCER_SUBCLASS_G5_DN	23	0.329697	1.85785	0.012	0.0201942	1
KYNG_ENVIRONMENTAL_STRESS_RESPONSE_NOT_BY_GAMMA_IN_OLD	26	0.312456	1.85661	0.0184426	0.0203106	1
MARIADASON_REGULATED_BY_HISTONE_ACETYLATION_DN	39	0.252845	1.85593	0.0142276	0.0203627	1
WENDT_COHESIN_TARGETS_UP	30	0.284031	1.85538	0.0142857	0.0204092	1
BHAT_ESR1_TARGETS_NOT_VIA_AKT1_DN	84	0.172609	1.85478	0.0127389	0.0204666	1
TIEN_INTESTINE_PROBIOTICS_2HR_UP	26	0.303344	1.85381	0.0078125	0.0205609	1
CHICAS_RB1_TARGETS_LOW_SERUM	69	0.189334	1.85317	0.00594059	0.0206345	1
GARGALOVIC_RESPONSE_TO_OXIDIZED_PHOSPHOLIPIDS_TURQUOISE_DN	45	0.228886	1.85144	0.0143443	0.0208256	1
AMIT_EGF_RESPONSE_60_HELA	44	0.234959	1.8513	0.0100402	0.0208251	1
WIERENGA_STAT5A_TARGETS_DN	170	0.120176	1.84875	0.00583658	0.0210907	1
BRACHAT_RESPONSE_TO_METHOTREXATE_DN	23	0.316465	1.84442	0.021097	0.0216293	1
ZHAN_MULTIPLE_MYELOMA_MF_UP	45	0.227034	1.84417	0.00788955	0.0216405	1
BOYLAN_MULTIPLE_MYELOMA_C_D_UP	124	0.143445	1.84256	0.012	0.021812	1
PEREZ_TP53_AND_TP63_TARGETS	180	0.121344	1.84216	0.00968992	0.0218528	1
MURAKAMI_UV_RESPONSE_6HR_UP	29	0.289886	1.84179	0.0159046	0.0218798	1
WESTON_VEGFA_TARGETS	95	0.158094	1.84138	0.0146751	0.0219152	1
VART_KSHV_INFECTION_ANGIOGENIC_MARKERS_UP	156	0.126712	1.83854	0.0137795	0.0222063	1
BILBAN_B_CLL_LPL_DN	36	0.263428	1.83756	0.0205761	0.0223068	1
SUBTIL_PROGESTIN_TARGETS	33	0.276497	1.83555	0.00980392	0.0225313	1
LY_AGING_OLD_DN	52	0.218686	1.83502	0.0181818	0.0225702	1
FRASOR_RESPONSE_TO_SERM_OR_FULVESTRANT_UP	21	0.328922	1.83429	0.0166667	0.0226397	1
BHAT_ESR1_TARGETS_VIA_AKT1_DN	77	0.175812	1.83413	0.0141988	0.0226309	1
LEIN_MIDBRAIN_MARKERS	81	0.171622	1.83388	0.00828157	0.022645	1
ELVIDGE_HYPOXIA_BY_DMOG_DN	56	0.210934	1.83318	0.0149893	0.0227266	1
TOMIDA_METASTASIS_UP	22	0.325485	1.83219	0.0155039	0.022835	1
RAMPON_ENRICHED_LEARNING_ENVIRONMENT_LATE_UP	21	0.342968	1.83199	0.0154143	0.022841	1
RASHI_RESPONSE_TO_IONIZING_RADIATION_3	43	0.23774	1.83044	0.0204918	0.0230109	1
SAKAI_TUMOR_INFILTRATING_MONOCYTES_UP	26	0.302632	1.82897	0.00988142	0.023186	1
GOLDRATH_IMMUNE_MEMORY	61	0.202792	1.8284	0.0157791	0.0232365	1
GAZDA_DIAMOND_BLACKFAN_ANEMIA_MYELOID_UP	27	0.296261	1.82418	0.0196464	0.0238161	1
BASSO_CD40_SIGNALING_DN	63	0.194534	1.82355	0.010142	0.0238787	1
CAFFAREL_RESPONSE_TO_THC_UP	30	0.270663	1.82259	0.0120968	0.0239868	1
MCDOWELL_ACUTE_LUNG_INJURY_UP	40	0.239658	1.8215	0.00998004	0.0241341	1
JEON_SMAD6_TARGETS_UP	23	0.320179	1.821	0.0179283	0.0241804	1
LAU_APOPTOSIS_CDKN2A_UP	50	0.22174	1.82084	0.0123203	0.024196	1
ODONNELL_TFRC_TARGETS_DN	115	0.144685	1.81878	0.0177866	0.0244617	1
SANSOM_APC_TARGETS_UP	119	0.142314	1.81761	0.00417537	0.0246281	1
LINDGREN_BLADDER_CANCER_HIGH_RECURRENCE	45	0.220454	1.81655	0.00770713	0.0247488	1
HEDENFALK_BREAST_CANCER_BRACX_UP	18	0.355714	1.81652	0.0178218	0.0247344	1
HANN_RESISTANCE_TO_BCL2_INHIBITOR_UP	28	0.282992	1.81645	0.0211864	0.0247294	1
SHIPP_DLBCL_CURED_VS_FATAL_DN	39	0.255722	1.81533	0.0184049	0.0248717	1
BOYAULT_LIVER_CANCER_SUBCLASS_G23_UP	49	0.218241	1.81432	0.012605	0.0249942	1
VECCHI_GASTRIC_CANCER_EARLY_DN	313	0.0878255	1.81385	0.0124224	0.0250248	1
ELVIDGE_HIF1A_AND_HIF2A_TARGETS_DN	94	0.160061	1.81362	0.0160643	0.0250235	1
GARGALOVIC_RESPONSE_TO_OXIDIZED_PHOSPHOLIPIDS_YELLOW_DN	20	0.342787	1.81242	0.015873	0.0251566	1
SHETH_LIVER_CANCER_VS_TXNIP_LOSS_PAM3	67	0.190319	1.8109	0.0160966	0.0253367	1
STEIN_ESRRA_TARGETS_RESPONSIVE_TO_ESTROGEN_UP	24	0.313581	1.81086	0.0201613	0.0253233	1
HOLLEMAN_VINCRISTINE_RESISTANCE_B_ALL_DN	16	0.380066	1.80999	0.00963391	0.0254381	1
LIANG_HEMATOPOIESIS_STEM_CELL_NUMBER_LARGE_VS_TINY_UP	38	0.246329	1.80994	0.0103093	0.0254246	1
MULLIGHAN_NPM1_SIGNATURE_3_DN	147	0.130891	1.80992	0.0145833	0.0254072	1
BILANGES_SERUM_SENSITIVE_VIA_TSC1	21	0.327065	1.80871	0.0190678	0.0255625	1
KAUFFMANN_DNA_REPAIR_GENES	210	0.108644	1.80793	0.0141129	0.025652	1
GARGALOVIC_RESPONSE_TO_OXIDIZED_PHOSPHOLIPIDS_MAGENTA_UP	22	0.324285	1.80792	0.0118343	0.0256332	1
MEISSNER_NPC_HCP_WITH_H3K4ME2	454	0.0738949	1.80669	0.0168067	0.0257986	1
UZONYI_RESPONSE_TO_LEUKOTRIENE_AND_THROMBIN	34	0.25541	1.80619	0.015534	0.0258363	1
GEORGES_CELL_CYCLE_MIR192_TARGETS	58	0.199102	1.80428	0.0246914	0.0260616	1
YAO_TEMPORAL_RESPONSE_TO_PROGESTERONE_CLUSTER_8	46	0.224729	1.80285	0.00992064	0.0262391	1
BOHN_PRIMARY_IMMUNODEFICIENCY_SYNDROM_UP	41	0.232123	1.80198	0.0119284	0.0263419	1
DORN_ADENOVIRUS_INFECTION_12HR_DN	30	0.281674	1.80191	0.0179283	0.0263397	1
GUILLAUMOND_KLF10_TARGETS_DN	29	0.287977	1.79878	0.0120968	0.0267983	1
MASSARWEH_RESPONSE_TO_ESTRADIOL	61	0.194562	1.79691	0.0119048	0.0270565	1
ANDERSEN_LIVER_CANCER_KRT19_UP	32	0.262172	1.79677	0.0159046	0.0270628	1
WANG_LSD1_TARGETS_UP	23	0.314168	1.79557	0.0179283	0.0272083	1
KUMAR_PATHOGEN_LOAD_BY_MACROPHAGES	205	0.109741	1.79399	0.0217822	0.0274302	1
MACLACHLAN_BRCA1_TARGETS_UP	20	0.329861	1.79303	0.0233463	0.0275316	1
HEIDENBLAD_AMPLICON_8Q24_UP	35	0.256118	1.79297	0.0174292	0.0275258	1
KYNG_ENVIRONMENTAL_STRESS_RESPONSE_NOT_BY_4NQO_IN_WS	32	0.259438	1.79273	0.0123967	0.0275381	1
RASHI_RESPONSE_TO_IONIZING_RADIATION_1	35	0.257787	1.79042	0.0269231	0.0278732	1
CHANG_IMMORTALIZED_BY_HPV31_UP	62	0.198769	1.79027	0.026749	0.0278736	1
QUINTENS_EMBRYONIC_BRAIN_RESPONSE_TO_IR	69	0.18336	1.78949	0.0155945	0.0279921	1
GOTZMANN_EPITHELIAL_TO_MESENCHYMAL_TRANSITION_UP	63	0.189903	1.78888	0.0122951	0.0280447	1
ZHAN_MULTIPLE_MYELOMA_HP_UP	38	0.245381	1.78801	0.0207039	0.0281622	1
SAMOLS_TARGETS_OF_KHSV_MIRNAS_DN	52	0.208198	1.78713	0.0152672	0.0282962	1
BASSO_CD40_SIGNALING_UP	91	0.161243	1.78693	0.0122449	0.028295	1
HOFMANN_MYELODYSPLASTIC_SYNDROM_LOW_RISK_DN	27	0.284922	1.78691	0.0114504	0.0282732	1
LU_TUMOR_ANGIOGENESIS_UP	25	0.292377	1.78366	0.0176125	0.028756	1
NIKOLSKY_BREAST_CANCER_17Q21_Q25_AMPLICON	289	0.0919049	1.78073	0.0230608	0.0291961	1
MARCHINI_TRABECTEDIN_RESISTANCE_UP	16	0.362394	1.77993	0.0320641	0.0292914	1
LEE_METASTASIS_AND_ALTERNATIVE_SPLICING_DN	43	0.226985	1.77943	0.0100806	0.0293426	1
HOFFMANN_PRE_BI_TO_LARGE_PRE_BII_LYMPHOCYTE_DN	71	0.178719	1.77777	0.0137255	0.0296038	1
SCIBETTA_KDM5B_TARGETS_UP	17	0.364105	1.77555	0.022449	0.0299218	1
DAWSON_METHYLATED_IN_LYMPHOMA_TCL1	56	0.204759	1.7733	0.020284	0.0302805	1
FIGUEROA_AML_METHYLATION_CLUSTER_3_DN	30	0.268722	1.7732	0.0140281	0.0302713	1
ZHAN_MULTIPLE_MYELOMA_HP_DN	44	0.224349	1.77304	0.0291829	0.030275	1
PEREZ_TP63_TARGETS	311	0.0890372	1.76994	0.0276596	0.030771	1
VERHAAK_AML_WITH_NPM1_MUTATED_UP	159	0.118979	1.76907	0.0126316	0.0308947	1
LEE_AGING_CEREBELLUM_DN	68	0.179673	1.76785	0.0124224	0.0310703	1
YANG_BREAST_CANCER_ESR1_DN	25	0.294044	1.7658	0.0263158	0.0314085	1
CHEN_LVAD_SUPPORT_OF_FAILING_HEART_DN	40	0.23412	1.76561	0.0152091	0.0314267	1
PETRETTO_HEART_MASS_QTL_CIS_DN	18	0.346528	1.76422	0.0161616	0.031657	1
LEE_NEURAL_CREST_STEM_CELL_UP	142	0.125975	1.76329	0.0177515	0.0318113	1
FLOTHO_PEDIATRIC_ALL_THERAPY_RESPONSE_DN	25	0.297468	1.76227	0.0248963	0.0319659	1
DAZARD_UV_RESPONSE_CLUSTER_G1	55	0.201102	1.76043	0.0242424	0.0322612	1
WU_HBX_TARGETS_1_DN	22	0.303647	1.75901	0.0119048	0.0324725	1
BURTON_ADIPOGENESIS_1	30	0.266703	1.75806	0.0250482	0.0325957	1
BILD_SRC_ONCOGENIC_SIGNATURE	53	0.206364	1.75527	0.0290135	0.0330422	1
GARGALOVIC_RESPONSE_TO_OXIDIZED_PHOSPHOLIPIDS_GREY_DN	68	0.178474	1.75515	0.0210728	0.0330325	1
ROVERSI_GLIOMA_LOH_REGIONS	42	0.227906	1.75491	0.0150215	0.0330429	1
MIKKELSEN_MEF_ICP_WITH_H3K4ME3_AND_H3K27ME3	37	0.241534	1.75479	0.0195695	0.0330369	1
GARCIA_TARGETS_OF_FLI1_AND_DAX1_UP	45	0.224762	1.75218	0.0200401	0.0334034	1
CREIGHTON_AKT1_SIGNALING_VIA_MTOR_DN	22	0.312793	1.75203	0.0232558	0.0334072	1
ROYLANCE_BREAST_CANCER_16Q_COPY_NUMBER_DN	22	0.312504	1.75181	0.0203666	0.0334225	1
ASTON_MAJOR_DEPRESSIVE_DISORDER_UP	41	0.231924	1.75148	0.0219561	0.0334723	1
KANG_CISPLATIN_RESISTANCE_UP	17	0.351558	1.75141	0.023301	0.0334572	1
BRUINS_UVC_RESPONSE_VIA_TP53_GROUP_D	242	0.0972714	1.75001	0.0219561	0.0336661	1
GEISS_RESPONSE_TO_DSRNA_UP	36	0.251649	1.74866	0.0285714	0.033878	1
AMIT_EGF_RESPONSE_40_MCF10A	16	0.364352	1.74855	0.0174757	0.03387	1
NATSUME_RESPONSE_TO_INTERFERON_BETA_DN	47	0.216051	1.74803	0.00817996	0.0339364	1
PUJANA_BREAST_CANCER_WITH_BRCA1_MUTATED_UP	54	0.19797	1.74793	0.020284	0.0339348	1
CASORELLI_APL_SECONDARY_VS_DE_NOVO_UP	35	0.244389	1.74455	0.0254403	0.034474	1
FERRANDO_T_ALL_WITH_MLL_ENL_FUSION_UP	79	0.169861	1.74438	0.0278884	0.0344796	1
MCLACHLAN_DENTAL_CARIES_UP	198	0.101977	1.74264	0.0183299	0.0347542	1
EBAUER_TARGETS_OF_PAX3_FOXO1_FUSION_UP	174	0.112346	1.74261	0.0247423	0.0347331	1
STAMBOLSKY_RESPONSE_TO_VITAMIN_D3_UP	73	0.168951	1.74254	0.0230126	0.0347196	1
SIMBULAN_UV_RESPONSE_IMMORTALIZED_DN	30	0.267737	1.74245	0.03	0.0347088	1
LIM_MAMMARY_STEM_CELL_DN	389	0.0756978	1.74138	0.0181087	0.0348851	1
MULLIGHAN_NPM1_MUTATED_SIGNATURE_2_DN	67	0.180876	1.73735	0.0201613	0.0355804	1
CHEN_PDGF_TARGETS	18	0.333002	1.73681	0.0198413	0.0356577	1
ZHAN_V1_LATE_DIFFERENTIATION_GENES_UP	28	0.280533	1.7354	0.0215686	0.0358714	1
FIGUEROA_AML_METHYLATION_CLUSTER_1_DN	37	0.244868	1.73533	0.0209524	0.0358596	1
SMIRNOV_CIRCULATING_ENDOTHELIOCYTES_IN_CANCER_UP	144	0.125534	1.73361	0.0150659	0.0361256	1
DAVICIONI_MOLECULAR_ARMS_VS_ERMS_DN	174	0.114498	1.73357	0.0239521	0.0361124	1
KATSANOU_ELAVL1_TARGETS_DN	131	0.12994	1.73332	0.0158416	0.0361318	1
NIKOLSKY_BREAST_CANCER_16Q24_AMPLICON	45	0.219508	1.73259	0.024952	0.0362705	1
LI_INDUCED_T_TO_NATURAL_KILLER_DN	129	0.131819	1.73209	0.0121704	0.0363371	1
FARDIN_HYPOXIA_11	31	0.263038	1.73013	0.0234375	0.0366564	1
IVANOVA_HEMATOPOIESIS_STEM_CELL_LONG_TERM	194	0.108091	1.72942	0.0289017	0.0367713	1
TCGA_GLIOBLASTOMA_COPY_NUMBER_DN	28	0.274132	1.72906	0.0247934	0.0368075	1
LIU_SMARCA4_TARGETS	45	0.216058	1.72686	0.028463	0.03715	1
LI_WILMS_TUMOR_VS_FETAL_KIDNEY_2_UP	27	0.281521	1.7237	0.0219124	0.0377739	1
CHYLA_CBFA2T3_TARGETS_DN	202	0.104294	1.72301	0.0239521	0.037876	1
YAO_TEMPORAL_RESPONSE_TO_PROGESTERONE_CLUSTER_9	68	0.182336	1.72295	0.0123967	0.0378553	1
DAVICIONI_PAX_FOXO1_SIGNATURE_IN_ARMS_DN	20	0.326915	1.7218	0.0258449	0.0380545	1
JI_RESPONSE_TO_FSH_UP	56	0.202203	1.7216	0.0336634	0.0380597	1
WHITFIELD_CELL_CYCLE_G1_S	116	0.139472	1.72148	0.027833	0.0380537	1
GENTILE_UV_LOW_DOSE_UP	23	0.302208	1.72133	0.0189394	0.0380453	1
MARTIN_INTERACT_WITH_HDAC	38	0.234154	1.72131	0.0139165	0.0380197	1
WIKMAN_ASBESTOS_LUNG_CANCER_UP	16	0.355613	1.71856	0.0244399	0.0385727	1
LIAO_HAVE_SOX4_BINDING_SITES	39	0.226484	1.71762	0.0245902	0.0387248	1
RIGGINS_TAMOXIFEN_RESISTANCE_UP	62	0.183921	1.71737	0.019305	0.0387421	1
BENPORATH_ES_CORE_NINE_CORRELATED	97	0.151033	1.7168	0.026971	0.0388444	1
SASAI_RESISTANCE_TO_NEOPLASTIC_TRANSFROMATION	47	0.216096	1.71561	0.0159363	0.0390738	1
KYNG_RESPONSE_TO_H2O2_VIA_ERCC6	17	0.348255	1.7151	0.025641	0.0391618	1
YORDY_RECIPROCAL_REGULATION_BY_ETS1_AND_SP100_UP	20	0.322654	1.7132	0.0235294	0.0394966	1
JAEGER_METASTASIS_UP	37	0.236871	1.71278	0.0240481	0.0395634	1
SENESE_HDAC1_AND_HDAC2_TARGETS_DN	200	0.104645	1.71277	0.0238569	0.0395393	1
TAVOR_CEBPA_TARGETS_UP	43	0.219136	1.71239	0.0157791	0.039584	1
EINAV_INTERFERON_SIGNATURE_IN_CANCER	24	0.29174	1.71214	0.0184049	0.0396115	1
YAO_TEMPORAL_RESPONSE_TO_PROGESTERONE_CLUSTER_16	74	0.170058	1.71123	0.0214425	0.0398231	1
ZIRN_TRETINOIN_RESPONSE_WT1_UP	22	0.298889	1.71022	0.0306748	0.0400042	1
DORSAM_HOXA9_TARGETS_DN	31	0.258838	1.70847	0.026975	0.0403752	1
KIM_ALL_DISORDERS_OLIGODENDROCYTE_NUMBER_CORR_DN	27	0.270693	1.70678	0.0241449	0.0406806	1
NADLER_HYPERGLYCEMIA_AT_OBESITY	53	0.198969	1.70546	0.0255403	0.0408979	1
NAKAMURA_ADIPOGENESIS_EARLY_DN	35	0.238611	1.70525	0.0225989	0.0409024	1
GAZDA_DIAMOND_BLACKFAN_ANEMIA_ERYTHROID_UP	26	0.283737	1.70444	0.0305677	0.0410277	1
HAN_JNK_SINGALING_UP	31	0.256637	1.70373	0.026	0.0411476	1
VECCHI_GASTRIC_CANCER_ADVANCED_VS_EARLY_UP	156	0.115962	1.70232	0.0294695	0.0414035	1
PEART_HDAC_PROLIFERATION_CLUSTER_UP	51	0.198379	1.70091	0.034	0.0416305	1
GENTILE_UV_RESPONSE_CLUSTER_D6	30	0.260231	1.69937	0.0205339	0.0419046	1
HADDAD_T_LYMPHOCYTE_AND_NK_PROGENITOR_UP	75	0.168363	1.69927	0.0392927	0.0418913	1
VECCHI_GASTRIC_CANCER_EARLY_UP	389	0.0757896	1.69784	0.0368932	0.0421468	1
KLEIN_PRIMARY_EFFUSION_LYMPHOMA_UP	46	0.213025	1.69757	0.0288462	0.0421771	1
PRAMOONJAGO_SOX4_TARGETS_UP	50	0.199866	1.69552	0.0231579	0.0425897	1
WANG_METHYLATED_IN_BREAST_CANCER	31	0.250991	1.69488	0.0164271	0.0426909	1
BOGNI_TREATMENT_RELATED_MYELOID_LEUKEMIA_DN	28	0.269385	1.69455	0.029703	0.0427339	1
HESS_TARGETS_OF_HOXA9_AND_MEIS1_DN	70	0.176222	1.69396	0.0386179	0.0428235	1
GOLUB_ALL_VS_AML_DN	20	0.308236	1.69368	0.0352697	0.0428606	1
RASHI_RESPONSE_TO_IONIZING_RADIATION_4	40	0.226172	1.69281	0.0282828	0.0430233	1
SESTO_RESPONSE_TO_UV_C3	18	0.325638	1.69236	0.0337711	0.0430978	1
BROWNE_HCMV_INFECTION_1HR_UP	51	0.195342	1.69152	0.0219561	0.0433032	1
ACEVEDO_LIVER_TUMOR_VS_NORMAL_ADJACENT_TISSUE_DN	233	0.094661	1.6905	0.0220884	0.0434711	1
HOLLERN_MICROACINAR_BREAST_TUMOR_UP	42	0.224356	1.69008	0.028	0.0435206	1
FIRESTEIN_CTNNB1_PATHWAY	31	0.254309	1.68921	0.0185567	0.0436736	1
YAMASHITA_LIVER_CANCER_WITH_EPCAM_UP	51	0.19928	1.68803	0.042885	0.0438999	1
WOTTON_RUNX_TARGETS_DN	28	0.273469	1.68726	0.02079	0.0440293	1
BAKKER_FOXO3_TARGETS_UP	50	0.204838	1.68696	0.0295276	0.0440576	1
HOLLEMAN_VINCRISTINE_RESISTANCE_ALL_DN	20	0.313547	1.68673	0.0244399	0.044073	1
NIKOLSKY_BREAST_CANCER_17Q11_Q21_AMPLICON	112	0.135492	1.68516	0.0257937	0.0444124	1
ALONSO_METASTASIS_NEURAL_UP	17	0.34097	1.68452	0.0253411	0.0445234	1
COLIN_PILOCYTIC_ASTROCYTOMA_VS_GLIOBLASTOMA_DN	27	0.268205	1.68448	0.0206612	0.044506	1
CAFFAREL_RESPONSE_TO_THC_DN	26	0.273833	1.6835	0.0244898	0.0446995	1
DELASERNA_MYOD_TARGETS_UP	82	0.159908	1.68298	0.031746	0.0448108	1
MCCABE_HOXC6_TARGETS_DN	19	0.308928	1.6826	0.0256917	0.0448646	1
PARK_HSC_VS_MULTIPOTENT_PROGENITORS_UP	17	0.341822	1.68095	0.0225873	0.0451813	1
TERAO_AOX4_TARGETS_SKIN_DN	16	0.351887	1.68065	0.0221774	0.0452098	1
PURBEY_TARGETS_OF_CTBP1_AND_SATB1_UP	68	0.171407	1.67956	0.0326923	0.0454054	1
STEIN_ESR1_TARGETS	80	0.156358	1.67828	0.0207039	0.0456687	1
BERENJENO_TRANSFORMED_BY_RHOA_REVERSIBLY_DN	27	0.272379	1.67789	0.0224949	0.0457253	1
CEBALLOS_TARGETS_OF_TP53_AND_MYC_DN	32	0.251936	1.67773	0.0250965	0.0457225	1
SPIELMAN_LYMPHOBLAST_EUROPEAN_VS_ASIAN_2FC_DN	17	0.3399	1.67602	0.042471	0.0461302	1
LINDSTEDT_DENDRITIC_CELL_MATURATION_C	57	0.189636	1.67535	0.0344828	0.0462484	1
LIU_VAV3_PROSTATE_CARCINOGENESIS_UP	77	0.164146	1.67527	0.0298211	0.0462358	1
NIKOLSKY_BREAST_CANCER_12Q24_AMPLICON	15	0.36719	1.67233	0.0302419	0.0469033	1
YANG_BREAST_CANCER_ESR1_LASER_UP	29	0.26328	1.67226	0.0140281	0.0468867	1
LEE_AGING_MUSCLE_DN	36	0.232093	1.66833	0.0222222	0.0477688	1
BOWIE_RESPONSE_TO_TAMOXIFEN	15	0.360466	1.66616	0.0326531	0.0482063	1
NIKOLSKY_BREAST_CANCER_7P22_AMPLICON	37	0.232736	1.66603	0.0272904	0.0481876	1
LI_LUNG_CANCER	40	0.224466	1.666	0.026	0.0481607	1
ROSS_AML_WITH_AML1_ETO_FUSION	67	0.168433	1.66592	0.0337302	0.0481518	1
PLASARI_TGFB1_TARGETS_1HR_UP	33	0.240137	1.66017	0.0333988	0.0495026	1
BANDRES_RESPONSE_TO_CARMUSTIN_MGMT_48HR_DN	147	0.114052	1.65953	0.0202429	0.0496281	1
LI_WILMS_TUMOR_VS_FETAL_KIDNEY_2_DN	48	0.205059	1.65684	0.0374753	0.0502343	1
GAUSSMANN_MLL_AF4_FUSION_TARGETS_G_UP	221	0.0966904	1.65551	0.0386179	0.0505451	1
WANG_RESPONSE_TO_BEXAROTENE_DN	24	0.281852	1.65383	0.0388889	0.0509239	1
HELLER_SILENCED_BY_METHYLATION_UP	236	0.0941877	1.65371	0.0374753	0.050914	1
OUYANG_PROSTATE_CANCER_PROGRESSION_DN	20	0.310888	1.65222	0.0251572	0.0512484	1
NIKOLSKY_BREAST_CANCER_7Q21_Q22_AMPLICON	59	0.183517	1.65212	0.0355731	0.0512431	1
CHEBOTAEV_GR_TARGETS_DN	113	0.133438	1.65077	0.032	0.0515688	1
ZHU_CMV_ALL_DN	108	0.133073	1.6502	0.0419048	0.0516703	1
BERENJENO_TRANSFORMED_BY_RHOA_FOREVER_UP	19	0.313081	1.64977	0.0419048	0.0517504	1
FIGUEROA_AML_METHYLATION_CLUSTER_2_UP	44	0.212533	1.64881	0.0299401	0.0519317	1
STAMBOLSKY_TARGETS_OF_MUTATED_TP53_DN	43	0.213398	1.64786	0.0387755	0.0521596	1
DELASERNA_MYOD_TARGETS_DN	55	0.187395	1.64727	0.041502	0.0522708	1
SANSOM_APC_TARGETS	185	0.104319	1.64642	0.0235294	0.0524759	1
URS_ADIPOCYTE_DIFFERENTIATION_UP	65	0.177692	1.64553	0.043659	0.0526366	1
HOLLERN_EMT_BREAST_TUMOR_UP	130	0.11991	1.64522	0.0278884	0.0527007	1
NADLER_OBESITY_DN	46	0.205388	1.64416	0.0487288	0.0529296	1
XU_AKT1_TARGETS_6HR	23	0.295201	1.64322	0.0366795	0.053155	1
ZHENG_GLIOBLASTOMA_PLASTICITY_DN	57	0.182854	1.64296	0.0390144	0.0531847	1
GALINDO_IMMUNE_RESPONSE_TO_ENTEROTOXIN	72	0.162389	1.64207	0.0335968	0.053402	1
TAKADA_GASTRIC_CANCER_COPY_NUMBER_DN	28	0.259978	1.64206	0.0415879	0.0533695	1
ZHAN_MULTIPLE_MYELOMA_MF_DN	40	0.214618	1.64204	0.0320513	0.053336	1
SARRIO_EPITHELIAL_MESENCHYMAL_TRANSITION_DN	135	0.124718	1.64163	0.03861	0.0534045	1
MIKKELSEN_NPC_LCP_WITH_H3K4ME3	52	0.194606	1.64112	0.0425101	0.0535035	1
TURASHVILI_BREAST_LOBULAR_CARCINOMA_VS_DUCTAL_NORMAL_UP	62	0.17802	1.63987	0.0425101	0.0537943	1
TANG_SENESCENCE_TP53_TARGETS_DN	49	0.197901	1.63688	0.046875	0.054499	1
HU_ANGIOGENESIS_UP	20	0.303767	1.63346	0.0375494	0.0553712	1
GAL_LEUKEMIC_STEM_CELL_UP	113	0.130741	1.63326	0.0473373	0.0553821	1
AMIT_SERUM_RESPONSE_60_MCF10A	52	0.194645	1.63167	0.0406504	0.0557772	1
VALK_AML_WITH_EVI1	20	0.312951	1.63128	0.0336634	0.0558544	1
VANTVEER_BREAST_CANCER_BRCA1_DN	40	0.211513	1.62943	0.0332681	0.056312	1
ABRAHAM_ALPC_VS_MULTIPLE_MYELOMA_DN	18	0.321004	1.62715	0.0334646	0.0568966	1
LIANG_HEMATOPOIESIS_STEM_CELL_NUMBER_LARGE_VS_TINY_DN	37	0.220387	1.62454	0.0476191	0.0575554	1
BROWNE_HCMV_INFECTION_6HR_UP	55	0.185968	1.61897	0.040619	0.0590198	1
LUI_THYROID_CANCER_CLUSTER_2	40	0.212344	1.61802	0.0420842	0.0592365	1
AMIT_SERUM_RESPONSE_40_MCF10A	28	0.258636	1.61624	0.0433884	0.0596962	1
MIKKELSEN_MCV6_ICP_WITH_H3K4ME3_AND_H3K27ME3	30	0.253281	1.61362	0.0393701	0.0604238	1
MARIADASON_RESPONSE_TO_BUTYRATE_SULINDAC_6	43	0.208834	1.61235	0.0355649	0.0607304	1
WILLERT_WNT_SIGNALING	19	0.311366	1.61201	0.0460922	0.0607726	1
AMIT_SERUM_RESPONSE_120_MCF10A	61	0.171747	1.612	0.0380762	0.0607344	1
KYNG_DNA_DAMAGE_BY_GAMMA_RADIATION	71	0.162438	1.61174	0.0262097	0.0607619	1
DACOSTA_ERCC3_ALLELE_XPCS_VS_TTD_UP	26	0.265686	1.61155	0.0564202	0.0607785	1
SHETH_LIVER_CANCER_VS_TXNIP_LOSS_PAM4	254	0.089058	1.60951	0.0477137	0.0613095	1
BONOME_OVARIAN_CANCER_POOR_SURVIVAL_DN	18	0.316828	1.60891	0.0430328	0.0614246	1
HU_GENOTOXIN_ACTION_DIRECT_VS_INDIRECT_4HR	37	0.221212	1.60876	0.0246914	0.0614226	1
FISCHER_G1_S_CELL_CYCLE	172	0.106075	1.60851	0.040404	0.0614538	1
TOMLINS_METASTASIS_DN	17	0.324658	1.6077	0.0450644	0.0616521	1
WANG_HCP_PROSTATE_CANCER	94	0.14164	1.60556	0.0413386	0.0622236	1
HOUSTIS_ROS	32	0.24191	1.60337	0.0356473	0.0628236	1
ELVIDGE_HIF1A_TARGETS_DN	83	0.151204	1.60289	0.044	0.062911	1
WANG_RECURRENT_LIVER_CANCER_DN	16	0.33099	1.60256	0.0545455	0.0629584	1
HUANG_FOXA2_TARGETS_UP	44	0.205467	1.60152	0.063655	0.0632331	1
HOLLEMAN_ASPARAGINASE_RESISTANCE_ALL_UP	19	0.302113	1.59997	0.0482456	0.0636615	1
HOLLERN_MICROACINAR_BREAST_TUMOR_DN	15	0.351052	1.59844	0.0567951	0.0640894	1
MIYAGAWA_TARGETS_OF_EWSR1_ETS_FUSIONS_UP	243	0.0900159	1.59827	0.0571429	0.0640926	1
SAFFORD_T_LYMPHOCYTE_ANERGY	83	0.149244	1.59791	0.0434783	0.0641536	1
WINTER_HYPOXIA_DN	45	0.197084	1.59674	0.0510204	0.0645065	1
KAPOSI_LIVER_CANCER_MET_UP	18	0.317099	1.5961	0.0598802	0.0646736	1
KIM_LIVER_CANCER_POOR_SURVIVAL_UP	21	0.293808	1.5934	0.0517598	0.0654877	1
CHIANG_LIVER_CANCER_SUBCLASS_UNANNOTATED_UP	73	0.155894	1.59207	0.0481172	0.0658675	1
NIKOLSKY_MUTATED_AND_AMPLIFIED_IN_BREAST_CANCER	82	0.151632	1.59191	0.0446809	0.0658673	1
YIH_RESPONSE_TO_ARSENITE_C3	29	0.245825	1.59129	0.0336842	0.0660226	1
PEART_HDAC_PROLIFERATION_CLUSTER_DN	70	0.163679	1.58907	0.0396226	0.0666755	1
NOJIMA_SFRP2_TARGETS_DN	24	0.27135	1.58877	0.0485232	0.0667258	1
CHEBOTAEV_GR_TARGETS_UP	74	0.159519	1.58796	0.0264766	0.0669113	1
AMIT_EGF_RESPONSE_60_MCF10A	34	0.231922	1.58761	0.0564516	0.0669837	1
SMIRNOV_RESPONSE_TO_IR_6HR_DN	101	0.134183	1.58752	0.0497018	0.0669624	1
BARIS_THYROID_CANCER_DN	57	0.17571	1.58729	0.0451866	0.0669875	1
NAKAMURA_ADIPOGENESIS_LATE_DN	34	0.230559	1.58385	0.0494071	0.0680839	1
LEE_CALORIE_RESTRICTION_MUSCLE_UP	33	0.228665	1.58381	0.0419162	0.0680574	1
OUYANG_PROSTATE_CANCER_PROGRESSION_UP	20	0.291658	1.57973	0.045082	0.0693379	1
VILLANUEVA_LIVER_CANCER_KRT19_UP	148	0.113022	1.5773	0.0472279	0.0700836	1
WAGNER_APO2_SENSITIVITY	22	0.28633	1.57697	0.0602151	0.0701444	1
ALCALAY_AML_BY_NPM1_LOCALIZATION_UP	126	0.120548	1.57439	0.0482897	0.0709282	1
NAGASHIMA_NRG1_SIGNALING_DN	45	0.198036	1.5742	0.0390947	0.0709389	1
CHEN_LVAD_SUPPORT_OF_FAILING_HEART_UP	89	0.141682	1.57117	0.0320641	0.0718827	1
WU_HBX_TARGETS_2_UP	21	0.286301	1.57088	0.0434783	0.0719212	1
WEINMANN_ADAPTATION_TO_HYPOXIA_UP	27	0.248658	1.56881	0.0420842	0.0725671	1
HOOI_ST7_TARGETS_DN	97	0.136793	1.56869	0.0519751	0.0725612	1
AFFAR_YY1_TARGETS_UP	180	0.100422	1.56691	0.059387	0.0731342	1
NAGY_TFTC_COMPONENTS_HUMAN	16	0.324971	1.56586	0.0608519	0.0734118	1
LU_TUMOR_ENDOTHELIAL_MARKERS_UP	20	0.286076	1.56534	0.0461847	0.0735295	1
CORRE_MULTIPLE_MYELOMA_UP	64	0.164336	1.55989	0.0581395	0.0752609	1
WANG_LSD1_TARGETS_DN	36	0.219429	1.55717	0.0461255	0.0761918	1
PLASARI_TGFB1_SIGNALING_VIA_NFIC_1HR_UP	28	0.249727	1.55626	0.0450098	0.0764342	1
KIM_MYC_AMPLIFICATION_TARGETS_DN	83	0.143269	1.55415	0.0592885	0.0771533	1
TONKS_TARGETS_OF_RUNX1_RUNX1T1_FUSION_MONOCYTE_DN	44	0.194132	1.55258	0.047817	0.077707	1
TURASHVILI_BREAST_DUCTAL_CARCINOMA_VS_DUCTAL_NORMAL_UP	43	0.200786	1.55225	0.045738	0.0777744	1
TONKS_TARGETS_OF_RUNX1_RUNX1T1_FUSION_SUSTAINDED_IN_ERYTHROCYTE_UP	41	0.204325	1.55152	0.0517241	0.0779901	1
SANA_RESPONSE_TO_IFNG_UP	51	0.188391	1.55148	0.0538922	0.0779474	1
SESTO_RESPONSE_TO_UV_C4	19	0.298005	1.55053	0.0482625	0.0782053	1
HUMMERICH_SKIN_CANCER_PROGRESSION_DN	92	0.139655	1.55028	0.0476191	0.0782322	1
HOSHIDA_LIVER_CANCER_LATE_RECURRENCE_UP	58	0.1715	1.55028	0.059761	0.0781826	1
REN_BOUND_BY_E2F	53	0.178826	1.549	0.0607966	0.0785725	1
SCHMIDT_POR_TARGETS_IN_LIMB_BUD_UP	25	0.258653	1.54631	0.0521042	0.0794719	1
FONTAINE_FOLLICULAR_THYROID_ADENOMA_UP	70	0.152729	1.54571	0.0444444	0.0796246	1
BRACHAT_RESPONSE_TO_CAMPTOTHECIN_UP	21	0.276628	1.54532	0.0660194	0.0797219	1
WHITEHURST_PACLITAXEL_SENSITIVITY	32	0.226	1.54301	0.0599613	0.0804687	1
EBAUER_TARGETS_OF_PAX3_FOXO1_FUSION_DN	44	0.19472	1.54221	0.0505051	0.0807294	1
DALESSIO_TSA_RESPONSE	19	0.290557	1.54103	0.057377	0.0811068	1
ROZANOV_MMP14_TARGETS_DN	28	0.247949	1.54035	0.0602151	0.0813174	1
BRUINS_UVC_RESPONSE_VIA_TP53_GROUP_C	79	0.147608	1.53918	0.0661157	0.0817096	1
NIKOLSKY_BREAST_CANCER_16P13_AMPLICON	97	0.131716	1.53883	0.0551331	0.0817931	1
MCBRYAN_PUBERTAL_BREAST_3_4WK_DN	33	0.221643	1.53729	0.0605428	0.08231	1
NGUYEN_NOTCH1_TARGETS_UP	27	0.248257	1.5348	0.0399202	0.0831517	1
MOREAUX_B_LYMPHOCYTE_MATURATION_BY_TACI_UP	74	0.149618	1.53171	0.0554415	0.084205	1
BOYLAN_MULTIPLE_MYELOMA_D_CLUSTER_UP	27	0.250228	1.53168	0.0721443	0.0841707	1
FLECHNER_BIOPSY_KIDNEY_TRANSPLANT_REJECTED_VS_OK_UP	78	0.14736	1.52945	0.0550098	0.0849634	1
KUNINGER_IGF1_VS_PDGFB_TARGETS_DN	44	0.19096	1.52557	0.0652174	0.0863911	1
TAKEDA_TARGETS_OF_NUP98_HOXA9_FUSION_8D_DN	163	0.10205	1.52496	0.0497925	0.0865446	1
GRAHAM_CML_QUIESCENT_VS_NORMAL_DIVIDING_UP	47	0.189747	1.52399	0.0688172	0.0868486	1
RODRIGUES_NTN1_TARGETS_UP	15	0.330598	1.51875	0.0659341	0.0889215	1
CHIBA_RESPONSE_TO_TSA_DN	19	0.288255	1.5183	0.0600775	0.0890418	1
WILSON_PROTEASES_AT_TUMOR_BONE_INTERFACE_UP	20	0.284616	1.51826	0.0502092	0.0889989	1
DURAND_STROMA_NS_UP	142	0.109571	1.51802	0.0582329	0.0890279	1
DIRMEIER_LMP1_RESPONSE_EARLY	61	0.166206	1.51688	0.0596708	0.0894442	1
SEITZ_NEOPLASTIC_TRANSFORMATION_BY_8P_DELETION_DN	30	0.229504	1.51641	0.0804829	0.089552	1
HOLLEMAN_VINCRISTINE_RESISTANCE_ALL_UP	25	0.257201	1.51604	0.0677618	0.0896241	1
MULLIGHAN_NPM1_MUTATED_SIGNATURE_1_DN	116	0.122112	1.51441	0.0737705	0.0902073	1
GUENTHER_GROWTH_SPHERICAL_VS_ADHERENT_DN	24	0.255977	1.51427	0.0593047	0.0902062	1
DOANE_BREAST_CANCER_CLASSES_DN	30	0.226925	1.5126	0.0609037	0.090799	1
CHANG_IMMORTALIZED_BY_HPV31_DN	49	0.182825	1.512	0.0589391	0.090952	1
NAKAMURA_METASTASIS_MODEL_UP	41	0.200105	1.51128	0.0732673	0.0911874	1
WEIGEL_OXIDATIVE_STRESS_BY_TBH_AND_H2O2	33	0.221257	1.5109	0.0657371	0.0912873	1
BOYAULT_LIVER_CANCER_SUBCLASS_G2	27	0.241458	1.50827	0.0562249	0.0922442	1
YIH_RESPONSE_TO_ARSENITE_C1	22	0.269512	1.50722	0.0464135	0.0926299	1
OUILLETTE_CLL_13Q14_DELETION_DN	50	0.180937	1.50527	0.0701403	0.0933734	1
BOYAULT_LIVER_CANCER_SUBCLASS_G6_DN	19	0.287397	1.50488	0.0666667	0.0934702	1
YANG_BREAST_CANCER_ESR1_BULK_DN	22	0.263173	1.50387	0.0649087	0.0937936	1
LINDSTEDT_DENDRITIC_CELL_MATURATION_B	46	0.190478	1.50324	0.0859539	0.0940242	1
KONDO_PROSTATE_CANCER_HCP_WITH_H3K27ME3	86	0.139506	1.49915	0.0773694	0.0956038	1
GARGALOVIC_RESPONSE_TO_OXIDIZED_PHOSPHOLIPIDS_GREEN_UP	24	0.254509	1.49881	0.0658683	0.0956954	1
LIN_TUMOR_ESCAPE_FROM_IMMUNE_ATTACK	19	0.284915	1.4985	0.0684411	0.0957603	1
SEKI_INFLAMMATORY_RESPONSE_LPS_UP	70	0.150054	1.49784	0.0698603	0.0959759	1
WOTTON_RUNX_TARGETS_UP	20	0.278594	1.49781	0.0805785	0.0959368	1
FERREIRA_EWINGS_SARCOMA_UNSTABLE_VS_STABLE_DN	81	0.143379	1.49544	0.0599174	0.0968947	1
GRADE_COLON_AND_RECTAL_CANCER_DN	91	0.134938	1.49489	0.0711297	0.0970847	1
KANNAN_TP53_TARGETS_UP	52	0.177429	1.49441	0.062249	0.0972322	1
NIKOLSKY_BREAST_CANCER_5P15_AMPLICON	23	0.263993	1.49415	0.0653846	0.0972773	1
TERAMOTO_OPN_TARGETS_CLUSTER_7	16	0.302856	1.49392	0.0708502	0.097313	1
YAO_TEMPORAL_RESPONSE_TO_PROGESTERONE_CLUSTER_1	67	0.157592	1.49332	0.0598802	0.0975069	1
MAGRANGEAS_MULTIPLE_MYELOMA_IGLL_VS_IGLK_DN	21	0.268309	1.49152	0.0635593	0.0981735	1
BROWNE_HCMV_INFECTION_10HR_DN	49	0.179661	1.49129	0.0685484	0.0982187	1
SMIRNOV_RESPONSE_TO_IR_2HR_UP	47	0.184156	1.491	0.0626223	0.0982602	1
WALLACE_PROSTATE_CANCER_UP	19	0.282974	1.49072	0.0741445	0.0983022	1
CROONQUIST_STROMAL_STIMULATION_UP	52	0.17131	1.48804	0.0755467	0.0994227	1
TSENG_ADIPOGENIC_POTENTIAL_DN	45	0.19057	1.48788	0.077551	0.0994258	1
LANDIS_BREAST_CANCER_PROGRESSION_DN	67	0.153188	1.48601	0.0712871	0.100183	1
CHIARADONNA_NEOPLASTIC_TRANSFORMATION_KRAS_CDC25_DN	50	0.175495	1.48556	0.0931174	0.100323	1
KYNG_WERNER_SYNDROM_DN	15	0.317736	1.48454	0.0862745	0.100708	1
SWEET_KRAS_TARGETS_DN	57	0.161783	1.48387	0.0687623	0.100929	1
WHITE_NEUROBLASTOMA_WITH_1P36.3_DELETION	19	0.279408	1.48152	0.0792683	0.101894	1
LINDSTEDT_DENDRITIC_CELL_MATURATION_D	55	0.169298	1.48133	0.0772201	0.101904	1
NELSON_RESPONSE_TO_ANDROGEN_DN	17	0.298389	1.4794	0.0580913	0.102639	1
HOFMANN_CELL_LYMPHOMA_UP	41	0.193363	1.47938	0.0879121	0.102581	1
DAZARD_UV_RESPONSE_CLUSTER_G4	18	0.283149	1.47885	0.0821918	0.102755	1
ROY_WOUND_BLOOD_VESSEL_UP	45	0.190097	1.47665	0.089613	0.103646	1
GROSS_HYPOXIA_VIA_ELK3_ONLY_UP	31	0.224389	1.47524	0.0571992	0.104224	1
MAGRANGEAS_MULTIPLE_MYELOMA_IGLL_VS_IGLK_UP	38	0.200045	1.4722	0.0910891	0.105591	1
AIYAR_COBRA1_TARGETS_UP	36	0.205384	1.47074	0.0767635	0.106163	1
SESTO_RESPONSE_TO_UV_C6	36	0.201574	1.47051	0.0946746	0.106222	1
COWLING_MYCN_TARGETS	40	0.194526	1.47033	0.0889371	0.106242	1
KYNG_DNA_DAMAGE_BY_UV	54	0.170836	1.46995	0.0778689	0.106374	1
GUTIERREZ_CHRONIC_LYMPHOCYTIC_LEUKEMIA_DN	50	0.176206	1.46896	0.0603622	0.106783	1
SCIAN_CELL_CYCLE_TARGETS_OF_TP53_AND_TP73_DN	22	0.262652	1.4677	0.0734463	0.107293	1
VALK_AML_CLUSTER_3	30	0.225024	1.46755	0.0868687	0.10729	1
DACOSTA_UV_RESPONSE_VIA_ERCC3_XPCS_UP	23	0.25913	1.46622	0.0863158	0.107871	1
WENG_POR_TARGETS_GLOBAL_DN	22	0.271742	1.46466	0.0762712	0.108584	1
SILIGAN_BOUND_BY_EWS_FLT1_FUSION	44	0.183484	1.46355	0.07	0.109049	1
CHUNG_BLISTER_CYTOTOXICITY_DN	38	0.196431	1.46292	0.0888889	0.109285	1
GROSS_ELK3_TARGETS_DN	32	0.218941	1.46245	0.0836735	0.109448	1
WUNDER_INFLAMMATORY_RESPONSE_AND_CHOLESTEROL_UP	49	0.180592	1.46229	0.0705394	0.109453	1
LIU_IL13_MEMORY_MODEL_UP	16	0.303891	1.46206	0.0702087	0.109493	1
KARAKAS_TGFB1_SIGNALING	16	0.301493	1.46148	0.0736842	0.109686	1
VANDESLUIS_COMMD1_TARGETS_GROUP_3_DN	35	0.204595	1.46031	0.0891089	0.110168	1
ZHAN_MULTIPLE_MYELOMA_CD2_UP	41	0.19292	1.46012	0.0653061	0.110188	1
VANTVEER_BREAST_CANCER_BRCA1_UP	39	0.195588	1.45862	0.0912621	0.11084	1
WHITFIELD_CELL_CYCLE_S	127	0.107918	1.45787	0.0798319	0.111105	1
MCBRYAN_PUBERTAL_BREAST_6_7WK_DN	72	0.146422	1.45609	0.0983936	0.111893	1
ONDER_CDH1_TARGETS_3_UP	16	0.294972	1.45597	0.0861723	0.111879	1
TSAI_RESPONSE_TO_IONIZING_RADIATION	138	0.102844	1.45542	0.0791075	0.112075	1
LEIN_LOCALIZED_TO_DISTAL_AND_PROXIMAL_DENDRITES	16	0.30232	1.45306	0.0959184	0.113173	1
TURASHVILI_BREAST_LOBULAR_CARCINOMA_VS_LOBULAR_NORMAL_DN	66	0.151281	1.45208	0.0907298	0.11358	1
DELACROIX_RAR_TARGETS_UP	44	0.186221	1.45203	0.0792079	0.113537	1
CHIN_BREAST_CANCER_COPY_NUMBER_UP	25	0.242128	1.45113	0.0825147	0.11393	1
KIM_LRRC3B_TARGETS	19	0.272953	1.45109	0.0916844	0.113885	1
TARTE_PLASMA_CELL_VS_PLASMABLAST_UP	322	0.0685417	1.45087	0.0973631	0.113918	1
DUTERTRE_ESTRADIOL_RESPONSE_6HR_DN	84	0.13428	1.45072	0.0901804	0.113925	1
MOROSETTI_FACIOSCAPULOHUMERAL_MUSCULAR_DISTROPHY_UP	19	0.277061	1.45005	0.0846774	0.114172	1
CEBALLOS_TARGETS_OF_TP53_AND_MYC_UP	20	0.265596	1.44843	0.0854871	0.114937	1
MORI_EMU_MYC_LYMPHOMA_BY_ONSET_TIME_DN	17	0.287459	1.44778	0.0792079	0.115183	1
LIANG_HEMATOPOIESIS_STEM_CELL_NUMBER_SMALL_VS_HUGE_DN	31	0.2223	1.44602	0.0836653	0.116026	1
VIETOR_IFRD1_TARGETS	21	0.264807	1.44509	0.0923077	0.116423	1
MARZEC_IL2_SIGNALING_DN	34	0.212687	1.44383	0.0825147	0.116985	1
CHIANG_LIVER_CANCER_SUBCLASS_PROLIFERATION_UP	160	0.0970855	1.44263	0.0881148	0.117488	1
VANHARANTA_UTERINE_FIBROID_UP	42	0.19036	1.44149	0.107356	0.118017	1
KUUSELO_PANCREATIC_CANCER_19Q13_AMPLIFICATION	20	0.270864	1.44129	0.0800781	0.118049	1
ZWANG_EGF_PERSISTENTLY_DN	55	0.16304	1.43976	0.0977012	0.118712	1
POS_HISTAMINE_RESPONSE_NETWORK	29	0.221639	1.43925	0.0917969	0.118906	1
DAUER_STAT3_TARGETS_UP	44	0.181579	1.43756	0.0930233	0.119681	1
HUTTMANN_B_CLL_POOR_SURVIVAL_DN	52	0.170876	1.43628	0.0910891	0.120282	1
LENAOUR_DENDRITIC_CELL_MATURATION_DN	114	0.11399	1.43622	0.0711462	0.120234	1
ZHANG_ANTIVIRAL_RESPONSE_TO_RIBAVIRIN_UP	23	0.247116	1.4347	0.0815534	0.120914	1
YAO_TEMPORAL_RESPONSE_TO_PROGESTERONE_CLUSTER_15	31	0.22281	1.43376	0.0820611	0.121334	1
SUNG_METASTASIS_STROMA_DN	45	0.17873	1.43344	0.0936255	0.121434	1
ACEVEDO_LIVER_CANCER_WITH_H3K27ME3_DN	132	0.105397	1.43071	0.0856574	0.12278	1
KOBAYASHI_EGFR_SIGNALING_6HR_DN	17	0.290613	1.4306	0.102296	0.122754	1
WU_APOPTOSIS_BY_CDKN1A_VIA_TP53	50	0.167967	1.42856	0.0983264	0.123794	1
SEMENZA_HIF1_TARGETS	34	0.208247	1.42846	0.0950495	0.123771	1
XU_HGF_SIGNALING_NOT_VIA_AKT1_48HR_DN	17	0.285526	1.42702	0.10119	0.124424	1
KYNG_NORMAL_AGING_DN	15	0.310163	1.42502	0.0896414	0.125377	1
MARZEC_IL2_SIGNALING_UP	107	0.115191	1.4245	0.0882957	0.125558	1
AMIT_SERUM_RESPONSE_480_MCF10A	33	0.209157	1.42433	0.0930693	0.125581	1
WU_ALZHEIMER_DISEASE_DN	16	0.29786	1.42314	0.0871287	0.126152	1
ONDER_CDH1_SIGNALING_VIA_CTNNB1	80	0.13422	1.42073	0.100616	0.127345	1
SARTIPY_BLUNTED_BY_INSULIN_RESISTANCE_UP	15	0.304269	1.42027	0.114286	0.127529	1
FOURNIER_ACINAR_DEVELOPMENT_LATE_DN	21	0.256023	1.41483	0.110429	0.130395	1
STEIN_ESTROGEN_RESPONSE_NOT_VIA_ESRRA	18	0.283864	1.41326	0.110647	0.131204	1
NIKOLSKY_BREAST_CANCER_6P24_P22_AMPLICON	21	0.261673	1.41284	0.0929293	0.13134	1
RAY_TUMORIGENESIS_BY_ERBB2_CDC25A_UP	170	0.094011	1.41183	0.109615	0.13185	1
WALLACE_JAK2_TARGETS_UP	19	0.270335	1.4095	0.115619	0.133061	1
OSADA_ASCL1_TARGETS_UP	45	0.184885	1.40898	0.109127	0.133251	1
VALK_AML_CLUSTER_16	23	0.244723	1.40868	0.11336	0.133327	1
SEITZ_NEOPLASTIC_TRANSFORMATION_BY_8P_DELETION_UP	62	0.151386	1.40724	0.108434	0.134046	1
GILDEA_METASTASIS	24	0.2432	1.40706	0.123772	0.134066	1
MAHADEVAN_IMATINIB_RESISTANCE_UP	17	0.282417	1.40491	0.0992218	0.135229	1
BURTON_ADIPOGENESIS_PEAK_AT_16HR	37	0.191996	1.40427	0.102249	0.135522	1
LINDVALL_IMMORTALIZED_BY_TERT_DN	70	0.145618	1.4032	0.11157	0.136043	1
THILLAINADESAN_ZNF217_TARGETS_UP	37	0.201155	1.40274	0.112903	0.136233	1
TURASHVILI_BREAST_DUCTAL_CARCINOMA_VS_LOBULAR_NORMAL_UP	69	0.143226	1.4027	0.104651	0.136174	1
INGRAM_SHH_TARGETS_DN	57	0.156855	1.40155	0.129278	0.136772	1
CHYLA_CBFA2T3_TARGETS_UP	348	0.0650571	1.39968	0.0870445	0.137798	1
HUMMERICH_SKIN_CANCER_PROGRESSION_UP	81	0.133722	1.39629	0.109375	0.139685	1
NIKOLSKY_BREAST_CANCER_8P12_P11_AMPLICON	50	0.166929	1.39546	0.10917	0.140055	1
CLASPER_LYMPHATIC_VESSELS_DURING_METASTASIS_UP	20	0.26349	1.39457	0.10883	0.140464	1
MARKS_HDAC_TARGETS_DN	15	0.291335	1.39276	0.133333	0.141387	1
DACOSTA_ERCC3_ALLELE_XPCS_VS_TTD_DN	33	0.205699	1.39167	0.0918164	0.141959	1
ZWANG_CLASS_2_TRANSIENTLY_INDUCED_BY_EGF	44	0.173451	1.3875	0.106996	0.144396	1
DASU_IL6_SIGNALING_SCAR_UP	30	0.215933	1.38708	0.132296	0.144554	1
BOYLAN_MULTIPLE_MYELOMA_C_UP	47	0.16692	1.38269	0.107438	0.147087	1
GRAHAM_CML_QUIESCENT_VS_NORMAL_QUIESCENT_UP	81	0.130112	1.38155	0.126294	0.147688	1
BECKER_TAMOXIFEN_RESISTANCE_DN	47	0.168935	1.38031	0.107356	0.14837	1
KAMMINGA_EZH2_TARGETS	40	0.183711	1.37603	0.111588	0.150955	1
HALMOS_CEBPA_TARGETS_UP	44	0.178482	1.37478	0.124748	0.151634	1
TAKEDA_TARGETS_OF_NUP98_HOXA9_FUSION_10D_UP	161	0.0915359	1.3739	0.118712	0.152089	1
JAERVINEN_AMPLIFIED_IN_LARYNGEAL_CANCER	37	0.189984	1.3733	0.134809	0.152367	1
MARTIN_NFKB_TARGETS_UP	40	0.186179	1.37269	0.140039	0.15266	1
HINATA_NFKB_TARGETS_KERATINOCYTE_UP	78	0.133608	1.37182	0.119843	0.153101	1
ZHOU_INFLAMMATORY_RESPONSE_FIMA_UP	417	0.058173	1.37134	0.11583	0.153328	1
PARK_HSC_VS_MULTIPOTENT_PROGENITORS_DN	15	0.297112	1.37059	0.109756	0.153718	1
VALK_AML_CLUSTER_4	24	0.235936	1.37008	0.131021	0.153953	1
SCHEIDEREIT_IKK_INTERACTING_PROTEINS	50	0.170127	1.36937	0.108974	0.154319	1
VALK_AML_WITH_CEBPA	34	0.19829	1.36888	0.133201	0.154511	1
KERLEY_RESPONSE_TO_CISPLATIN_UP	40	0.178394	1.36836	0.128155	0.154758	1
RASHI_RESPONSE_TO_IONIZING_RADIATION_6	69	0.139314	1.36812	0.112676	0.154828	1
GARGALOVIC_RESPONSE_TO_OXIDIZED_PHOSPHOLIPIDS_BLACK_UP	31	0.206022	1.36481	0.120507	0.156803	1
MCBRYAN_PUBERTAL_TGFB1_TARGETS_DN	60	0.149509	1.36473	0.112426	0.156769	1
VANTVEER_BREAST_CANCER_METASTASIS_UP	56	0.153669	1.36443	0.12326	0.156858	1
CROONQUIST_NRAS_VS_STROMAL_STIMULATION_UP	37	0.190974	1.36379	0.131474	0.15717	1
VALK_AML_CLUSTER_5	23	0.245439	1.36172	0.137014	0.158439	1
KIM_MYCL1_AMPLIFICATION_TARGETS_DN	17	0.275493	1.36096	0.142315	0.158831	1
ONGUSAHA_TP53_TARGETS	31	0.205216	1.35972	0.126819	0.15955	1
ZHANG_INTERFERON_RESPONSE	20	0.253151	1.35953	0.13347	0.159554	1
GHO_ATF5_TARGETS_DN	15	0.291064	1.35937	0.132114	0.159574	1
SARTIPY_BLUNTED_BY_INSULIN_RESISTANCE_DN	18	0.265636	1.35872	0.150407	0.15994	1
AMBROSINI_FLAVOPIRIDOL_TREATMENT_TP53	96	0.118906	1.35782	0.134653	0.160413	1
FOURNIER_ACINAR_DEVELOPMENT_EARLY_UP	18	0.271233	1.35175	0.138	0.164205	1
MARKEY_RB1_CHRONIC_LOF_UP	108	0.112632	1.35143	0.143725	0.164341	1
ALTEMEIER_RESPONSE_TO_LPS_WITH_MECHANICAL_VENTILATION	102	0.113028	1.35056	0.136187	0.164794	1
ISSAEVA_MLL2_TARGETS	55	0.153252	1.34923	0.135081	0.165571	1
SCHLINGEMANN_SKIN_CARCINOGENESIS_TPA_UP	30	0.207813	1.34907	0.12731	0.165572	1
TORCHIA_TARGETS_OF_EWSR1_FLI1_FUSION_TOP20_UP	17	0.265848	1.34894	0.135802	0.16555	1
WANG_IMMORTALIZED_BY_HOXA9_AND_MEIS1_DN	22	0.238276	1.3479	0.137597	0.166138	1
KRASNOSELSKAYA_ILF3_TARGETS_UP	28	0.217113	1.34644	0.131213	0.166951	1
XU_HGF_TARGETS_INDUCED_BY_AKT1_6HR	16	0.276064	1.34567	0.142308	0.167366	1
LEONARD_HYPOXIA	42	0.179022	1.34563	0.122661	0.167286	1
BRACHAT_RESPONSE_TO_METHOTREXATE_UP	20	0.249106	1.34439	0.147609	0.168018	1
LIEN_BREAST_CARCINOMA_METAPLASTIC_VS_DUCTAL_UP	77	0.132484	1.3437	0.131021	0.168391	1
CHIANG_LIVER_CANCER_SUBCLASS_CTNNB1_UP	152	0.0901185	1.34284	0.136082	0.16889	1
KORKOLA_TERATOMA_UP	15	0.28795	1.34222	0.143418	0.169211	1
STAMBOLSKY_TARGETS_OF_MUTATED_TP53_UP	43	0.174299	1.34098	0.140927	0.169942	1
NAKAYAMA_SOFT_TISSUE_TUMORS_PCA1_DN	74	0.133664	1.34034	0.12963	0.170298	1
TONKS_TARGETS_OF_RUNX1_RUNX1T1_FUSION_HSC_DN	172	0.089141	1.33923	0.153398	0.170909	1
BOHN_PRIMARY_IMMUNODEFICIENCY_SYNDROM_DN	37	0.191044	1.33906	0.131429	0.170909	1
VERRECCHIA_DELAYED_RESPONSE_TO_TGFB1	36	0.190337	1.33672	0.162933	0.172405	1
BREDEMEYER_RAG_SIGNALING_NOT_VIA_ATM_UP	60	0.147241	1.33641	0.145594	0.172508	1
BROWNE_HCMV_INFECTION_30MIN_UP	44	0.16911	1.33604	0.145194	0.172652	1
MORI_PLASMA_CELL_DN	35	0.187068	1.33455	0.143149	0.173544	1
ABE_INNER_EAR	39	0.18128	1.3335	0.140562	0.17418	1
GAUSSMANN_MLL_AF4_FUSION_TARGETS_G_DN	30	0.206603	1.33289	0.137255	0.174468	1
BERNARD_PPAPDC1B_TARGETS_DN	51	0.159812	1.33201	0.147638	0.174954	1
LEE_METASTASIS_AND_ALTERNATIVE_SPLICING_UP	68	0.13542	1.33187	0.1417	0.174964	1
ROSS_AML_WITH_CBFB_MYH11_FUSION	45	0.164995	1.32949	0.149402	0.176503	1
DUTTA_APOPTOSIS_VIA_NFKB	26	0.222168	1.3273	0.153543	0.177932	1
LANDIS_BREAST_CANCER_PROGRESSION_UP	42	0.17317	1.32562	0.141593	0.179022	1
GHANDHI_DIRECT_IRRADIATION_DN	32	0.196618	1.32561	0.129482	0.178925	1
RUAN_RESPONSE_TO_TNF_DN	75	0.129666	1.32507	0.152174	0.179184	1
NIKOLSKY_BREAST_CANCER_20Q11_AMPLICON	30	0.204855	1.32346	0.145455	0.180237	1
HOFFMANN_SMALL_PRE_BII_TO_IMMATURE_B_LYMPHOCYTE_UP	55	0.153584	1.32328	0.140625	0.180279	1
GAJATE_RESPONSE_TO_TRABECTEDIN_UP	56	0.14955	1.32231	0.127016	0.18087	1
CASTELLANO_NRAS_TARGETS_UP	62	0.141787	1.32189	0.144	0.181071	1
TIAN_TNF_SIGNALING_NOT_VIA_NFKB	21	0.238108	1.32183	0.144351	0.181013	1
VALK_AML_CLUSTER_8	22	0.23955	1.32172	0.178082	0.180973	1
MOOTHA_GLYCOGEN_METABOLISM	19	0.258147	1.31994	0.16381	0.182159	1
EPPERT_CE_HSC_LSC	34	0.190561	1.31851	0.150713	0.183073	1
YAN_ESCAPE_FROM_ANOIKIS	22	0.237666	1.31814	0.154786	0.183252	1
BURTON_ADIPOGENESIS_PEAK_AT_8HR	37	0.184724	1.31677	0.154876	0.18419	1
DIAZ_CHRONIC_MEYLOGENOUS_LEUKEMIA_DN	98	0.114398	1.3155	0.166667	0.185002	1
ROZANOV_MMP14_TARGETS_SUBSET	31	0.198862	1.314	0.15098	0.185966	1
BAELDE_DIABETIC_NEPHROPATHY_UP	77	0.127253	1.31394	0.150289	0.1859	1
SENESE_HDAC2_TARGETS_DN	113	0.103268	1.31137	0.169811	0.187634	1
RIZ_ERYTHROID_DIFFERENTIATION	76	0.126363	1.3105	0.154297	0.188196	1
GARGALOVIC_RESPONSE_TO_OXIDIZED_PHOSPHOLIPIDS_RED_DN	22	0.235251	1.31002	0.170478	0.188398	1
VALK_AML_CLUSTER_9	31	0.201149	1.30849	0.144737	0.189384	1
CHEOK_RESPONSE_TO_MERCAPTOPURINE_DN	17	0.25339	1.30784	0.141153	0.18977	1
ZHANG_ANTIVIRAL_RESPONSE_TO_RIBAVIRIN_DN	45	0.162187	1.30526	0.159449	0.191562	1
BUCKANOVICH_T_LYMPHOCYTE_HOMING_ON_TUMOR_DN	19	0.251016	1.30321	0.158333	0.192947	1
ABBUD_LIF_SIGNALING_1_UP	37	0.180407	1.30265	0.163498	0.193237	1
AMIT_SERUM_RESPONSE_20_MCF10A	15	0.274059	1.30198	0.156673	0.193598	1
HE_PTEN_TARGETS_UP	15	0.282047	1.30155	0.157791	0.193807	1
JAZAG_TGFB1_SIGNALING_VIA_SMAD4_UP	98	0.108857	1.29849	0.130879	0.19602	1
SMID_BREAST_CANCER_LUMINAL_A_DN	18	0.25211	1.29803	0.135729	0.196265	1
NIKOLSKY_BREAST_CANCER_11Q12_Q14_AMPLICON	140	0.0939717	1.29755	0.142857	0.196496	1
RASHI_NFKB1_TARGETS	16	0.273954	1.29622	0.146138	0.197363	1
MACLACHLAN_BRCA1_TARGETS_DN	15	0.274492	1.29543	0.168699	0.197844	1
GAUSSMANN_MLL_AF4_FUSION_TARGETS_E_DN	22	0.228867	1.293	0.181996	0.199498	1
FARMER_BREAST_CANCER_CLUSTER_2	32	0.191607	1.28781	0.188	0.203318	1
CHIANG_LIVER_CANCER_SUBCLASS_POLYSOMY7_DN	23	0.22742	1.28724	0.16129	0.203666	1
WENG_POR_DOSAGE	17	0.254646	1.28636	0.161943	0.20419	1
BYSTROEM_CORRELATED_WITH_IL5_UP	37	0.181435	1.28587	0.176	0.20449	1
ZHANG_GATA6_TARGETS_DN	62	0.13909	1.27709	0.157588	0.211083	1
KUMAR_AUTOPHAGY_NETWORK	57	0.142883	1.27508	0.176829	0.212527	1
HWANG_PROSTATE_CANCER_MARKERS	26	0.20556	1.2711	0.181087	0.215548	1
RICKMAN_HEAD_AND_NECK_CANCER_A	90	0.114204	1.26853	0.174603	0.217498	1
TURASHVILI_BREAST_CARCINOMA_DUCTAL_VS_LOBULAR_UP	18	0.253479	1.26685	0.175542	0.218745	1
IWANAGA_E2F1_TARGETS_INDUCED_BY_SERUM	22	0.22289	1.26682	0.184524	0.218652	1
DURCHDEWALD_SKIN_CARCINOGENESIS_UP	74	0.124734	1.26596	0.183594	0.219227	1
HOFFMANN_IMMATURE_TO_MATURE_B_LYMPHOCYTE_UP	36	0.171775	1.26499	0.190763	0.219954	1
HOFFMANN_IMMATURE_TO_MATURE_B_LYMPHOCYTE_DN	44	0.161066	1.26229	0.174757	0.222107	1
YEGNASUBRAMANIAN_PROSTATE_CANCER	110	0.102126	1.26074	0.198874	0.223282	1
INGRAM_SHH_TARGETS_UP	119	0.0972861	1.25989	0.168033	0.223853	1
HOSHIDA_LIVER_CANCER_SUBCLASS_S3	239	0.0696836	1.25892	0.171937	0.224532	1
FINETTI_BREAST_CANCERS_KINOME_BLUE	21	0.22561	1.25873	0.205029	0.224577	1
HASLINGER_B_CLL_WITH_13Q14_DELETION	22	0.224851	1.25834	0.204934	0.224756	1
XU_HGF_SIGNALING_NOT_VIA_AKT1_6HR	24	0.211144	1.25538	0.193018	0.227105	1
KATSANOU_ELAVL1_TARGETS_UP	148	0.0893711	1.25512	0.200397	0.227214	1
JAZAG_TGFB1_SIGNALING_VIA_SMAD4_DN	59	0.14063	1.25338	0.18711	0.228533	1
VALK_AML_CLUSTER_12	30	0.197629	1.25197	0.184647	0.229561	1
VALK_AML_CLUSTER_10	28	0.198758	1.24852	0.194389	0.232311	1
LUCAS_HNF4A_TARGETS_UP	53	0.144028	1.24837	0.202783	0.232305	1
HOWLIN_CITED1_TARGETS_2_UP	16	0.252505	1.24491	0.212891	0.235173	1
VALK_AML_CLUSTER_2	23	0.217535	1.2442	0.208068	0.235652	1
NEWMAN_ERCC6_TARGETS_DN	33	0.180476	1.24182	0.179435	0.237595	1
SENGUPTA_EBNA1_ANTICORRELATED	120	0.0953986	1.24051	0.205179	0.238585	1
CHUANG_OXIDATIVE_STRESS_RESPONSE_UP	25	0.214867	1.23885	0.205645	0.239883	1
AMIT_SERUM_RESPONSE_240_MCF10A	53	0.143395	1.23771	0.174664	0.240741	1
HOSHIDA_LIVER_CANCER_SURVIVAL_UP	72	0.124921	1.23706	0.204365	0.241179	1
LEI_HOXC8_TARGETS_DN	17	0.250218	1.23662	0.201271	0.241439	1
SANSOM_APC_TARGETS_DN	318	0.0601745	1.23628	0.213307	0.241595	1
CROMER_TUMORIGENESIS_UP	49	0.149672	1.23586	0.21499	0.241809	1
CHIARADONNA_NEOPLASTIC_TRANSFORMATION_KRAS_CDC25_UP	48	0.151469	1.23576	0.192623	0.241748	1
TURASHVILI_BREAST_DUCTAL_CARCINOMA_VS_LOBULAR_NORMAL_DN	57	0.13904	1.23453	0.198807	0.242629	1
GREENBAUM_E2A_TARGETS_DN	17	0.247082	1.23377	0.2	0.243169	1
WIKMAN_ASBESTOS_LUNG_CANCER_DN	27	0.199524	1.23114	0.213115	0.245379	1
ABBUD_LIF_SIGNALING_1_DN	23	0.209553	1.23061	0.195699	0.245717	1
PEDERSEN_METASTASIS_BY_ERBB2_ISOFORM_1	45	0.153492	1.22679	0.209581	0.248965	1
Negatively enriched in RCAS-CRE
NAME	SIZE	ES	NES	NOM p-val	FDR q-val	FWER p-val
MEISSNER_BRAIN_HCP_WITH_H3K27ME3	260	-0.451692	-8.44525	0	0	0
SENGUPTA_NASOPHARYNGEAL_CARCINOMA_DN	289	-0.233512	-4.52141	0	0	0
HOLLERN_EMT_BREAST_TUMOR_DN	117	-0.331263	-4.23389	0	0	0
LEIN_CHOROID_PLEXUS_MARKERS	97	-0.350099	-4.09196	0	0	0
MEISSNER_NPC_HCP_WITH_H3_UNMETHYLATED	498	-0.153357	-3.95068	0	0	0
MIKKELSEN_MEF_ICP_WITH_H3K27ME3	181	-0.246872	-3.91837	0	0	0
FLORIO_NEOCORTEX_BASAL_RADIAL_GLIA_UP	305	-0.194401	-3.8934	0	0	0
COLDREN_GEFITINIB_RESISTANCE_DN	198	-0.202277	-3.23178	0	4.02344e-05	0.001
LEIN_CEREBELLUM_MARKERS	81	-0.310357	-3.22001	0	3.57639e-05	0.001
AIGNER_ZEB1_TARGETS	33	-0.467077	-3.20717	0	3.21875e-05	0.001
WEBER_METHYLATED_HCP_IN_FIBROBLAST_DN	38	-0.430901	-3.17325	0	2.92614e-05	0.001
MEISSNER_NPC_HCP_WITH_H3K27ME3	76	-0.30787	-3.10935	0	5.39639e-05	0.002
MEISSNER_BRAIN_HCP_WITH_H3_UNMETHYLATED	33	-0.44458	-3.08302	0	4.98128e-05	0.002
ANDERSEN_CHOLANGIOCARCINOMA_CLASS2	161	-0.209244	-3.00547	0	0.000115298	0.005
MIKKELSEN_ES_LCP_WITH_H3K4ME3	128	-0.22112	-2.96047	0	0.000171577	0.008
HOLLERN_SQUAMOUS_BREAST_TUMOR	151	-0.203674	-2.93787	0	0.000180877	0.009
KONDO_PROSTATE_CANCER_WITH_H3K27ME3	144	-0.203574	-2.92808	0	0.000189141	0.01
HSIAO_LIVER_SPECIFIC_GENES	210	-0.169983	-2.8696	0	0.00027014	0.015
MEISSNER_BRAIN_HCP_WITH_H3K4ME2_AND_H3K27ME3	57	-0.318774	-2.81658	0	0.000341448	0.02
CHARAFE_BREAST_CANCER_BASAL_VS_MESENCHYMAL_UP	105	-0.233046	-2.81479	0	0.000340053	0.021
SHEN_SMARCA2_TARGETS_DN	242	-0.157501	-2.78437	0	0.000416621	0.027
MIKKELSEN_MCV6_LCP_WITH_H3K4ME3	151	-0.191301	-2.77718	0	0.000455203	0.031
MIKKELSEN_IPS_LCP_WITH_H3K4ME3	159	-0.186393	-2.7715	0	0.00047811	0.034
JAEGER_METASTASIS_DN	225	-0.156197	-2.74009	0	0.000553377	0.041
RICKMAN_HEAD_AND_NECK_CANCER_E	72	-0.274252	-2.67521	0	0.00092126	0.067
YAUCH_HEDGEHOG_SIGNALING_PARACRINE_DN	222	-0.148466	-2.64487	0	0.00108647	0.08
DUTERTRE_ESTRADIOL_RESPONSE_24HR_UP	306	-0.126891	-2.61306	0.00198807	0.001336	0.103
MIKKELSEN_MEF_LCP_WITH_H3K27ME3	63	-0.280978	-2.60256	0	0.00138023	0.11
BOSCO_EPITHELIAL_DIFFERENTIATION_MODULE	53	-0.301707	-2.60156	0	0.001344	0.111
LIU_CDX2_TARGETS_UP	32	-0.388667	-2.59479	0	0.00132099	0.113
RICKMAN_HEAD_AND_NECK_CANCER_D	25	-0.423133	-2.59327	0	0.00128853	0.114
OHGUCHI_LIVER_HNF4A_TARGETS_DN	145	-0.186058	-2.59119	0	0.00126882	0.116
SERVITJA_ISLET_HNF1A_TARGETS_DN	98	-0.217678	-2.55764	0	0.00150765	0.141
SABATES_COLORECTAL_ADENOMA_UP	119	-0.193979	-2.54146	0	0.00168429	0.16
RICKMAN_HEAD_AND_NECK_CANCER_C	88	-0.226892	-2.53446	0	0.00167307	0.163
SU_LIVER	49	-0.302943	-2.48468	0	0.002213	0.216
KIM_BIPOLAR_DISORDER_OLIGODENDROCYTE_DENSITY_CORR_DN	75	-0.239435	-2.48281	0	0.00217091	0.217
RICKMAN_HEAD_AND_NECK_CANCER_F	52	-0.299467	-2.47736	0	0.00219925	0.226
MIKKELSEN_MEF_HCP_WITH_H3_UNMETHYLATED	209	-0.150051	-2.47047	0	0.00231041	0.24
KONG_E2F3_TARGETS	92	-0.215159	-2.41017	0	0.00345529	0.342
WONG_ENDMETRIUM_CANCER_UP	22	-0.423519	-2.40577	0	0.00349755	0.352
RIZ_ERYTHROID_DIFFERENTIATION_6HR	37	-0.339083	-2.40336	0	0.00345318	0.354
MEISSNER_NPC_HCP_WITH_H3K4ME2_AND_H3K27ME3	338	-0.110944	-2.36201	0.00204918	0.0045139	0.44
MIKKELSEN_NPC_HCP_WITH_H3K27ME3	330	-0.110353	-2.33457	0.00199203	0.00533929	0.503
LEE_LIVER_CANCER_CIPROFIBRATE_DN	59	-0.258847	-2.33062	0.00203666	0.00537307	0.514
CAIRO_LIVER_DEVELOPMENT_DN	204	-0.141317	-2.32128	0	0.00564529	0.541
SENGUPTA_NASOPHARYNGEAL_CARCINOMA_WITH_LMP1_DN	130	-0.172601	-2.31079	0	0.00591352	0.568
ROSTY_CERVICAL_CANCER_PROLIFERATION_CLUSTER	131	-0.169215	-2.27527	0.00396825	0.00739669	0.661
WEBER_METHYLATED_HCP_IN_SPERM_DN	26	-0.370243	-2.24672	0	0.00901657	0.729
KANG_DOXORUBICIN_RESISTANCE_UP	50	-0.25989	-2.19258	0.00201207	0.0127172	0.841
FLORIO_NEOCORTEX_BASAL_RADIAL_GLIA_DN	170	-0.142246	-2.16787	0.00384615	0.0146228	0.882
KUNINGER_IGF1_VS_PDGFB_TARGETS_UP	78	-0.211675	-2.16359	0.00195695	0.0147582	0.888
SU_KIDNEY	15	-0.462415	-2.15399	0.00391389	0.0152972	0.902
HUMMERICH_BENIGN_SKIN_TUMOR_DN	19	-0.402591	-2.14889	0.00209644	0.0154728	0.905
LEE_LIVER_CANCER_DENA_DN	67	-0.220807	-2.13622	0	0.016454	0.919
CROMER_TUMORIGENESIS_DN	44	-0.271332	-2.11881	0.00193424	0.0182206	0.944
WEBER_METHYLATED_ICP_IN_FIBROBLAST	16	-0.437161	-2.11671	0	0.0181464	0.947
WHITFIELD_CELL_CYCLE_LITERATURE	44	-0.273313	-2.10644	0.00208768	0.0190483	0.96
MIKKELSEN_MCV6_ICP_WITH_H3K27ME3	68	-0.215239	-2.09995	0	0.0194973	0.966
CROONQUIST_NRAS_SIGNALING_DN	67	-0.216524	-2.05963	0.00416667	0.0249076	0.986
MEISSNER_NPC_ICP_WITH_H3_UNMETHYLATED	16	-0.421763	-2.02849	0	0.0295851	0.992
BOSCO_TH1_CYTOTOXIC_MODULE	101	-0.169734	-2.01455	0.00796813	0.031875	0.995
SERVITJA_LIVER_HNF1A_TARGETS_DN	142	-0.146967	-1.99956	0.002	0.0343569	0.996
WEBER_METHYLATED_HCP_IN_SPERM_UP	18	-0.385737	-1.99779	0.00813008	0.0341047	0.997
MIKKELSEN_IPS_ICP_WITH_H3K4ME3_AND_H327ME3	112	-0.160128	-1.97783	0.00189036	0.0379518	0.998
KIM_ALL_DISORDERS_CALB1_CORR_DN	34	-0.281203	-1.95335	0.00823045	0.0429875	0.999
SABATES_COLORECTAL_ADENOMA_DN	248	-0.107894	-1.95109	0.00607287	0.0428408	0.999
ZHOU_CELL_CYCLE_GENES_IN_IR_RESPONSE_6HR	80	-0.184797	-1.93742	0.0158103	0.0456345	0.999
BENPORATH_ES_2	40	-0.261969	-1.93379	0.0163934	0.0459549	0.999
ZHAN_MULTIPLE_MYELOMA_PR_UP	41	-0.255386	-1.92658	0.01	0.0472441	1
FOSTER_KDM1A_TARGETS_UP	226	-0.110997	-1.92053	0.00608519	0.0482287	1
BORCZUK_MALIGNANT_MESOTHELIOMA_DN	88	-0.174214	-1.91976	0.00761905	0.0477655	1
HATADA_METHYLATED_IN_LUNG_CANCER_DN	26	-0.315832	-1.89866	0.0102459	0.0531775	1
GAURNIER_PSMD4_TARGETS	46	-0.236315	-1.89813	0.00612245	0.0525867	1
CHEMELLO_SOLEUS_VS_EDL_MYOFIBERS_UP	16	-0.383722	-1.87398	0.00986193	0.059371	1
MATZUK_CENTRAL_FOR_FEMALE_FERTILITY	28	-0.294683	-1.86828	0.0119522	0.0604633	1
GRAHAM_NORMAL_QUIESCENT_VS_NORMAL_DIVIDING_DN	83	-0.174914	-1.83992	0.0142276	0.0696033	1
MEISSNER_BRAIN_HCP_WITH_H3K4ME2	18	-0.364455	-1.83765	0.0201207	0.0695386	1
ONDER_CDH1_TARGETS_3_DN	48	-0.230054	-1.83755	0.0163599	0.0686993	1
SCHAEFFER_PROSTATE_DEVELOPMENT_48HR_UP	414	-0.0783064	-1.83208	0.0163599	0.0700289	1
FRASOR_RESPONSE_TO_SERM_OR_FULVESTRANT_DN	48	-0.214523	-1.82837	0.00559702	0.0705611	1
MCBRYAN_PUBERTAL_BREAST_4_5WK_UP	255	-0.0980247	-1.82728	0.0193798	0.0701502	1
WORSCHECH_TUMOR_REJECTION_UP	52	-0.2194	-1.82405	0.0218254	0.0705453	1
SUMI_HNF4A_TARGETS	26	-0.300471	-1.81834	0.00785855	0.071936	1
LIM_MAMMARY_LUMINAL_PROGENITOR_UP	54	-0.211143	-1.81033	0.0120968	0.0743927	1
CHARAFE_BREAST_CANCER_LUMINAL_VS_MESENCHYMAL_UP	391	-0.0788767	-1.80854	0.0174757	0.0743074	1
ZHOU_CELL_CYCLE_GENES_IN_IR_RESPONSE_24HR	117	-0.137841	-1.80217	0.0214008	0.0760379	1
SU_THYMUS	17	-0.35596	-1.79286	0.0191571	0.0791222	1
KUROZUMI_RESPONSE_TO_ONCOCYTIC_VIRUS_AND_CYCLIC_RGD	18	-0.340172	-1.79169	0.0224949	0.0787053	1
LIEN_BREAST_CARCINOMA_METAPLASTIC_VS_DUCTAL_DN	92	-0.159491	-1.78396	0.0203666	0.0810679	1
SMID_BREAST_CANCER_NORMAL_LIKE_UP	408	-0.0757206	-1.78251	0.0251046	0.0808407	1
MADAN_DPPA4_TARGETS	45	-0.218062	-1.74854	0.00838574	0.0957297	1
MIKKELSEN_MCV6_LCP_WITH_H3K27ME3	22	-0.306461	-1.74183	0.031746	0.0980952	1
HUMMERICH_MALIGNANT_SKIN_TUMOR_DN	17	-0.340821	-1.71514	0.0239852	0.11091	1
POOLA_INVASIVE_BREAST_CANCER_UP	240	-0.0977175	-1.70705	0.0238569	0.114217	1
MIKKELSEN_MCV6_HCP_WITH_H3K27ME3	421	-0.0714132	-1.70256	0.0217391	0.115691	1
LEE_EARLY_T_LYMPHOCYTE_UP	95	-0.145539	-1.69182	0.0238095	0.120744	1
CREIGHTON_ENDOCRINE_THERAPY_RESISTANCE_2	373	-0.0740588	-1.68695	0.0303644	0.1225	1
ISHIDA_E2F_TARGETS	49	-0.210471	-1.68634	0.0227743	0.121686	1
SHIN_B_CELL_LYMPHOMA_CLUSTER_9	19	-0.321071	-1.66411	0.0394477	0.134242	1
MOLENAAR_TARGETS_OF_CCND1_AND_CDK4_DN	51	-0.196033	-1.66359	0.0246914	0.133241	1
NADERI_BREAST_CANCER_PROGNOSIS_UP	48	-0.20083	-1.65755	0.0280561	0.135913	1
RICKMAN_HEAD_AND_NECK_CANCER_B	35	-0.23547	-1.65504	0.0273109	0.136232	1
TUOMISTO_TUMOR_SUPPRESSION_BY_COL13A1_DN	16	-0.341444	-1.65337	0.0346154	0.136067	1
HOEGERKORP_CD44_TARGETS_DIRECT_UP	26	-0.277669	-1.64649	0.0476191	0.139427	1
LOPEZ_EPITHELIOID_MESOTHELIOMA	16	-0.336702	-1.6416	0.0433925	0.141446	1
FURUKAWA_DUSP6_TARGETS_PCI35_DN	70	-0.168492	-1.63739	0.0423077	0.143073	1
GU_PDEF_TARGETS_DN	37	-0.222487	-1.63433	0.0474308	0.144009	1
LEE_LIVER_CANCER_MYC_E2F1_DN	59	-0.179843	-1.63197	0.0364026	0.144332	1
LEE_LIVER_CANCER_ACOX1_DN	59	-0.181665	-1.6314	0.0327198	0.143459	1
EGUCHI_CELL_CYCLE_RB1_TARGETS	22	-0.290642	-1.60472	0.0320513	0.161494	1
MIKKELSEN_IPS_WITH_HCP_H3K27ME3	97	-0.141704	-1.60384	0.0364372	0.160738	1
VILIMAS_NOTCH1_TARGETS_DN	22	-0.285462	-1.59905	0.0573614	0.162917	1
VERHAAK_GLIOBLASTOMA_MESENCHYMAL	194	-0.100741	-1.59812	0.0467836	0.162184	1
LY_AGING_MIDDLE_DN	15	-0.339471	-1.57951	0.0390144	0.175059	1
FARMER_BREAST_CANCER_CLUSTER_1	35	-0.222353	-1.57277	0.0468432	0.178948	1
VANDESLUIS_COMMD1_TARGETS_GROUP_3_UP	77	-0.15119	-1.56076	0.0357143	0.187568	1
WANG_NFKB_TARGETS	22	-0.273768	-1.55744	0.0460251	0.188842	1
CHIANG_LIVER_CANCER_SUBCLASS_PROLIFERATION_DN	153	-0.109238	-1.55587	0.0471311	0.188531	1
LIANG_SILENCED_BY_METHYLATION_UP	28	-0.243939	-1.55552	0.0539499	0.187247	1
DE_YY1_TARGETS_UP	18	-0.300429	-1.5554	0.0538302	0.185807	1
ONDER_CDH1_TARGETS_2_DN	424	-0.0658873	-1.55347	0.041841	0.185808	1
LEE_LIVER_CANCER_SURVIVAL_UP	153	-0.105561	-1.55193	0.0544355	0.18559	1
ZHENG_IL22_SIGNALING_UP	48	-0.1885	-1.5507	0.0610236	0.185088	1
CAIRO_HEPATOBLASTOMA_POOR_SURVIVAL	15	-0.331961	-1.54334	0.062753	0.190068	1
PYEON_CANCER_HEAD_AND_NECK_VS_CERVICAL_DN	23	-0.267082	-1.52359	0.0800821	0.206042	1
SU_PANCREAS	38	-0.213982	-1.52327	0.0628803	0.204685	1
SMID_BREAST_CANCER_LUMINAL_A_UP	77	-0.150035	-1.51436	0.0710173	0.211317	1
CAIRO_HEPATOBLASTOMA_DN	235	-0.0852381	-1.50453	0.0688976	0.219256	1
MIKKELSEN_ES_ICP_WITH_H3K4ME3_AND_H3K27ME3	123	-0.117322	-1.49789	0.0582707	0.224141	1
DUAN_PRDM5_TARGETS	67	-0.150496	-1.49063	0.0686275	0.229563	1
MOREAUX_MULTIPLE_MYELOMA_BY_TACI_UP	318	-0.0717723	-1.48915	0.0594059	0.229355	1
HATADA_METHYLATED_IN_LUNG_CANCER_UP	332	-0.0696874	-1.48332	0.0718563	0.233461	1
XU_HGF_TARGETS_REPRESSED_BY_AKT1_DN	74	-0.147216	-1.48309	0.0691057	0.231995	1
MUELLER_METHYLATED_IN_GLIOBLASTOMA	35	-0.213519	-1.47103	0.0712871	0.242384	1
NAKAYAMA_SOFT_TISSUE_TUMORS_PCA1_UP	59	-0.166831	-1.46646	0.0857741	0.245325	1
KLEIN_TARGETS_OF_BCR_ABL1_FUSION	40	-0.197468	-1.4659	0.0795229	0.244158	1
FERRANDO_TAL1_NEIGHBORS	15	-0.31316	-1.46143	0.0698603	0.247142	1
SMID_BREAST_CANCER_LUMINAL_B_DN	488	-0.0575925	-1.4614	0.0903733	0.245409	1

## Sheet: bp c5
Positively enriched in RCAS-CRE
NAME	SIZE	ES	NES	NOM p-val	FDR q-val	FWER p-val
GO_PROCESS_UTILIZING_AUTOPHAGIC_MECHANISM	463	0.366482	9.29984	0	0	0
GO_RIBONUCLEOPROTEIN_COMPLEX_BIOGENESIS	385	0.395333	8.968	0	0	0
GO_MRNA_PROCESSING	460	0.359721	8.81773	0	0	0
GO_PROTEASOMAL_PROTEIN_CATABOLIC_PROCESS	452	0.343934	8.61117	0	0	0
GO_MACROAUTOPHAGY	274	0.439366	8.42292	0	0	0
GO_RNA_SPLICING	398	0.367417	8.41821	0	0	0
GO_REGULATION_OF_NEURON_PROJECTION_DEVELOPMENT	478	0.310146	8.02243	0	0	0
GO_MITOCHONDRION_ORGANIZATION	461	0.326506	7.98304	0	0	0
GO_GOLGI_VESICLE_TRANSPORT	338	0.360191	7.72615	0	0	0
GO_RNA_SPLICING_VIA_TRANSESTERIFICATION_REACTIONS	323	0.383815	7.65422	0	0	0
GO_REGULATION_OF_CELL_MORPHOGENESIS	474	0.296767	7.31663	0	0	0
GO_RIBOSOME_BIOGENESIS	264	0.387673	7.29517	0	0	0
GO_ESTABLISHMENT_OF_ORGANELLE_LOCALIZATION	381	0.311398	7.07108	0	0	0
GO_RNA_CATABOLIC_PROCESS	379	0.312413	6.97975	0	0	0
GO_REGULATION_OF_AUTOPHAGY	304	0.351665	6.95077	0	0	0
GO_PROTEIN_CONTAINING_COMPLEX_DISASSEMBLY	309	0.347893	6.94142	0	0	0
GO_NCRNA_METABOLIC_PROCESS	401	0.297575	6.93521	0	0	0
GO_NCRNA_PROCESSING	329	0.330433	6.92905	0	0	0
GO_REGULATION_OF_CELL_MORPHOGENESIS_INVOLVED_IN_DIFFERENTIATION	296	0.34372	6.90446	0	0	0
GO_PROTEIN_TARGETING	406	0.290849	6.89977	0	0	0
GO_SYNAPSE_ORGANIZATION	399	0.301362	6.87	0	0	0
GO_PROTEIN_CONTAINING_COMPLEX_LOCALIZATION	271	0.359894	6.73384	0	0	0
GO_REGULATION_OF_PROTEIN_CATABOLIC_PROCESS	363	0.295365	6.61802	0	0	0
GO_PROTEIN_POLYUBIQUITINATION	293	0.340809	6.61456	0	0	0
GO_ENDOMEMBRANE_SYSTEM_ORGANIZATION	393	0.281352	6.49215	0	0	0
GO_REGULATION_OF_MRNA_METABOLIC_PROCESS	305	0.325726	6.49117	0	0	0
GO_VESICLE_ORGANIZATION	304	0.315661	6.4675	0	0	0
GO_POSITIVE_REGULATION_OF_CELLULAR_COMPONENT_BIOGENESIS	492	0.24465	6.40702	0	0	0
GO_POSITIVE_REGULATION_OF_CATABOLIC_PROCESS	405	0.27174	6.39424	0	0	0
GO_NUCLEAR_TRANSPORT	324	0.299829	6.37071	0	0	0
GO_REGULATION_OF_TRANS_SYNAPTIC_SIGNALING	422	0.268613	6.3658	0	0	0
GO_RNA_LOCALIZATION	211	0.375345	6.35429	0	0	0
GO_POSITIVE_REGULATION_OF_CELLULAR_CATABOLIC_PROCESS	344	0.294953	6.35311	0	0	0
GO_VESICLE_LOCALIZATION	197	0.389252	6.33639	0	0	0
GO_CELLULAR_PROTEIN_COMPLEX_DISASSEMBLY	209	0.369373	6.32915	0	0	0
GO_RESPONSE_TO_ENDOPLASMIC_RETICULUM_STRESS	268	0.331456	6.30003	0	0	0
GO_REGULATION_OF_CYTOSKELETON_ORGANIZATION	498	0.240464	6.24403	0	0	0
GO_REGULATION_OF_MACROAUTOPHAGY	161	0.423303	6.23367	0	0	0
GO_POSITIVE_REGULATION_OF_CELL_PROJECTION_ORGANIZATION	365	0.276189	6.19399	0	0	0
GO_DENDRITE_DEVELOPMENT	232	0.350059	6.19357	0	0	0
GO_ENDOSOMAL_TRANSPORT	200	0.37276	6.11751	0	0	0
GO_RRNA_METABOLIC_PROCESS	203	0.368555	6.09578	0	0	0
GO_REGULATION_OF_CELLULAR_AMIDE_METABOLIC_PROCESS	406	0.254632	6.08503	0	0	0
GO_TRANSLATIONAL_ELONGATION	128	0.455494	6.07415	0	0	0
GO_ESTABLISHMENT_OF_PROTEIN_LOCALIZATION_TO_MEMBRANE	303	0.302424	6.00098	0	0	0
GO_MITOCHONDRIAL_GENE_EXPRESSION	157	0.415361	5.99868	0	0	0
GO_REGULATION_OF_CELLULAR_PROTEIN_CATABOLIC_PROCESS	236	0.334407	5.99612	0	0	0
GO_REGULATION_OF_AXONOGENESIS	183	0.382255	5.99489	0	0	0
GO_REGULATION_OF_PROTEIN_CONTAINING_COMPLEX_ASSEMBLY	397	0.260206	5.99261	0	0	0
GO_VACUOLAR_TRANSPORT	133	0.42721	5.9784	0	0	0
GO_DEPHOSPHORYLATION	453	0.245655	5.9718	0	0	0
GO_RIBONUCLEOPROTEIN_COMPLEX_SUBUNIT_ORGANIZATION	178	0.382204	5.96136	0	0	0
GO_CYTOSKELETON_DEPENDENT_INTRACELLULAR_TRANSPORT	171	0.387298	5.93574	0	0	0
GO_PROTEIN_MODIFICATION_BY_SMALL_PROTEIN_REMOVAL	260	0.322988	5.88981	0	0	0
GO_PROTEIN_FOLDING	196	0.359025	5.84643	0	0	0
GO_TRANSLATIONAL_TERMINATION	102	0.489077	5.83261	0	0	0
GO_VACUOLE_ORGANIZATION	148	0.410877	5.8243	0	0	0
GO_ENDOPLASMIC_RETICULUM_TO_GOLGI_VESICLE_MEDIATED_TRANSPORT	190	0.357081	5.80238	0	0	0
GO_ESTABLISHMENT_OF_RNA_LOCALIZATION	180	0.367437	5.79594	0	0	0
GO_POSITIVE_REGULATION_OF_NEURON_PROJECTION_DEVELOPMENT	273	0.308163	5.78405	0	0	0
GO_ENERGY_DERIVATION_BY_OXIDATION_OF_ORGANIC_COMPOUNDS	248	0.311066	5.7494	0	0	0
GO_REGULATION_OF_PROTEASOMAL_PROTEIN_CATABOLIC_PROCESS	173	0.377976	5.74824	0	0	0
GO_REGULATION_OF_CELLULAR_COMPONENT_SIZE	345	0.27067	5.72848	0	0	0
GO_TRANSLATIONAL_INITIATION	179	0.374725	5.70667	0	0	0
GO_DEVELOPMENTAL_CELL_GROWTH	220	0.327058	5.69502	0	0	0
GO_RAS_PROTEIN_SIGNAL_TRANSDUCTION	418	0.240597	5.68198	0	0	0
GO_CELLULAR_RESPIRATION	166	0.373665	5.67452	0	0	0
GO_RESPONSE_TO_TOPOLOGICALLY_INCORRECT_PROTEIN	188	0.352432	5.66259	0	0	0
GO_NUCLEOBASE_CONTAINING_COMPOUND_TRANSPORT	222	0.327242	5.64502	0	0	0
GO_NUCLEAR_EXPORT	184	0.35569	5.63171	0	0	0
GO_CYTOSOLIC_TRANSPORT	137	0.411779	5.6021	0	0	0
GO_REGULATION_OF_GTPASE_ACTIVITY	425	0.234533	5.58237	0	0	0
GO_MITOCHONDRIAL_TRANSLATION	133	0.422505	5.57817	0	0	0
GO_CELL_GROWTH	452	0.225894	5.55412	0	0	0
GO_GENERATION_OF_PRECURSOR_METABOLITES_AND_ENERGY	458	0.220895	5.54938	0	0	0
GO_POSITIVE_REGULATION_OF_NEURON_DIFFERENTIATION	360	0.254006	5.54492	0	0	0
GO_MITOCHONDRIAL_TRANSLATIONAL_TERMINATION	89	0.496419	5.50177	0	0	0
GO_ATP_METABOLIC_PROCESS	253	0.29414	5.49989	0	0	0
GO_POSITIVE_REGULATION_OF_CELLULAR_PROTEIN_LOCALIZATION	307	0.268349	5.48807	0	0	0
GO_NUCLEAR_TRANSCRIBED_MRNA_CATABOLIC_PROCESS	195	0.335018	5.48395	0	0	0
GO_GLYCOPROTEIN_METABOLIC_PROCESS	377	0.242431	5.44874	0	0	0
GO_REGULATION_OF_ANATOMICAL_STRUCTURE_SIZE	473	0.218251	5.44436	0	0	0
GO_PROTEIN_DEPHOSPHORYLATION	304	0.275287	5.43991	0	0	0
GO_DENDRITE_MORPHOGENESIS	138	0.396258	5.42968	0	0	0
GO_ANTIGEN_PROCESSING_AND_PRESENTATION_OF_PEPTIDE_ANTIGEN	158	0.362429	5.41924	0	0	0
GO_MICROTUBULE_BASED_TRANSPORT	176	0.351174	5.40015	0	0	0
GO_ANTIGEN_PROCESSING_AND_PRESENTATION	187	0.331	5.3856	0	0	0
GO_FC_RECEPTOR_SIGNALING_PATHWAY	173	0.347422	5.37144	0	0	0
GO_POSITIVE_REGULATION_OF_CELLULAR_PROTEIN_CATABOLIC_PROCESS	136	0.39007	5.3626	0	0	0
GO_RNA_EXPORT_FROM_NUCLEUS	127	0.412574	5.36045	0	0	0
GO_REGULATION_OF_PROTEIN_MODIFICATION_BY_SMALL_PROTEIN_CONJUGATION_OR_REMOVAL	214	0.31152	5.34148	0	0	0
GO_POST_TRANSLATIONAL_PROTEIN_MODIFICATION	346	0.248783	5.34015	0	0	0
GO_RIBOSE_PHOSPHATE_METABOLIC_PROCESS	368	0.239232	5.31699	0	0	0
GO_PROTEIN_LOCALIZATION_TO_CELL_PERIPHERY	313	0.259452	5.3159	0	0	0
GO_REGULATION_OF_SYNAPSE_STRUCTURE_OR_ACTIVITY	225	0.308547	5.31014	0	0	0
GO_REGULATION_OF_PROTEIN_STABILITY	255	0.289586	5.30277	0	0	0
GO_ATP_SYNTHESIS_COUPLED_ELECTRON_TRANSPORT	81	0.493033	5.30186	0	0	0
GO_RESPIRATORY_ELECTRON_TRANSPORT_CHAIN	98	0.453576	5.27397	0	0	0
GO_REGULATION_OF_SUPRAMOLECULAR_FIBER_ORGANIZATION	321	0.255583	5.27287	0	0	0
GO_POSITIVE_REGULATION_OF_PROTEIN_CATABOLIC_PROCESS	205	0.313532	5.25743	0	0	0
GO_REGULATION_OF_INTRACELLULAR_TRANSPORT	327	0.24485	5.23159	0	0	0
GO_POSITIVE_REGULATION_OF_CELL_MORPHOGENESIS_INVOLVED_IN_DIFFERENTIATION	155	0.356664	5.22242	0	0	0
GO_MYELOID_LEUKOCYTE_MEDIATED_IMMUNITY	482	0.210897	5.21521	0	0	0
GO_REGULATION_OF_DENDRITE_DEVELOPMENT	145	0.372071	5.19472	0	0	0
GO_GLYCOSYLATION	240	0.279364	5.18536	0	0	0
GO_COVALENT_CHROMATIN_MODIFICATION	429	0.218209	5.17324	0	0	0
GO_COGNITION	282	0.264027	5.14829	0	0	0
GO_POSITIVE_REGULATION_OF_PROTEOLYSIS_INVOLVED_IN_CELLULAR_PROTEIN_CATABOLIC_PROCESS	115	0.404353	5.14449	0	0	0
GO_CELLULAR_RESPONSE_TO_TOPOLOGICALLY_INCORRECT_PROTEIN	149	0.362554	5.14401	0	0	0
GO_GLYCOPROTEIN_BIOSYNTHETIC_PROCESS	310	0.249504	5.13994	0	0	0
GO_REGULATION_OF_CELL_CYCLE_PHASE_TRANSITION	428	0.211848	5.122	0	0	0
GO_DEVELOPMENTAL_GROWTH_INVOLVED_IN_MORPHOGENESIS	227	0.292344	5.11145	0	0	0
GO_REGULATION_OF_MRNA_PROCESSING	130	0.382183	5.09681	0	0	0
GO_NEURON_PROJECTION_EXTENSION	164	0.342086	5.09549	0	0	0
GO_MITOCHONDRIAL_TRANSPORT	216	0.305715	5.08906	0	0	0
GO_REGULATION_OF_UBIQUITIN_DEPENDENT_PROTEIN_CATABOLIC_PROCESS	145	0.361441	5.08095	0	0	0
GO_ORGANELLE_TRANSPORT_ALONG_MICROTUBULE	80	0.480011	5.07982	0	0	0
GO_POSITIVE_REGULATION_OF_GTPASE_ACTIVITY	354	0.231257	5.07803	0	0	0
GO_VESICLE_MEDIATED_TRANSPORT_IN_SYNAPSE	206	0.305922	5.0688	0	0	0
GO_REGULATION_OF_DEPHOSPHORYLATION	198	0.312516	5.05908	0	0	0
GO_AUTOPHAGOSOME_ORGANIZATION	83	0.46	5.0543	0	0	0
GO_AXO_DENDRITIC_TRANSPORT	66	0.52175	5.021	0	0	0
GO_REGULATION_OF_MITOCHONDRION_ORGANIZATION	171	0.330273	5.01765	0	0	0
GO_GOLGI_ORGANIZATION	120	0.397799	5.01736	0	0	0
GO_POSTSYNAPSE_ORGANIZATION	158	0.340762	5.00313	0	0	0
GO_RIBOSE_PHOSPHATE_BIOSYNTHETIC_PROCESS	154	0.349315	4.99939	0	0	0
GO_REGULATION_OF_PROTEASOMAL_UBIQUITIN_DEPENDENT_PROTEIN_CATABOLIC_PROCESS	119	0.39466	4.99795	0	0	0
GO_PROTEIN_POLYMERIZATION	248	0.273541	4.99348	0	0	0
GO_NEGATIVE_REGULATION_OF_INTRACELLULAR_SIGNAL_TRANSDUCTION	481	0.19783	4.99216	0	0	0
GO_POSITIVE_REGULATION_OF_UBIQUITIN_DEPENDENT_PROTEIN_CATABOLIC_PROCESS	92	0.43231	4.98419	0	0	0
GO_VESICLE_BUDDING_FROM_MEMBRANE	97	0.426519	4.93661	0	0	0
GO_PROTEIN_STABILIZATION	161	0.330493	4.9346	0	0	0
GO_POSITIVE_REGULATION_OF_PROTEOLYSIS	326	0.235052	4.9163	0	0	0
GO_POST_GOLGI_VESICLE_MEDIATED_TRANSPORT	94	0.422904	4.84637	0	0	0
GO_PROTEIN_LOCALIZATION_TO_ENDOPLASMIC_RETICULUM	129	0.355039	4.83103	0	0	0
GO_NEURON_DEATH	329	0.23473	4.81882	0	0	0
GO_RETROGRADE_VESICLE_MEDIATED_TRANSPORT_GOLGI_TO_ENDOPLASMIC_RETICULUM	81	0.454289	4.8136	0	0	0
GO_OXIDATIVE_PHOSPHORYLATION	107	0.395644	4.7816	0	0	0
GO_REGULATION_OF_MRNA_CATABOLIC_PROCESS	190	0.303057	4.7776	0	0	0
GO_ENSHEATHMENT_OF_NEURONS	128	0.359497	4.7772	0	0	0
GO_PROTEIN_LOCALIZATION_TO_NUCLEUS	244	0.261434	4.76363	0	0	0
GO_REGULATION_OF_PROTEIN_DEPHOSPHORYLATION	130	0.348658	4.74508	0	0	0
GO_RESPONSE_TO_TEMPERATURE_STIMULUS	222	0.274505	4.74174	0	0	0
GO_NEGATIVE_REGULATION_OF_NERVOUS_SYSTEM_DEVELOPMENT	288	0.247739	4.73706	0	0	0
GO_NEGATIVE_REGULATION_OF_NEURON_DIFFERENTIATION	209	0.287888	4.73416	0	0	0
GO_FC_EPSILON_RECEPTOR_SIGNALING_PATHWAY	109	0.385161	4.71889	0	0	0
GO_RNA_3_END_PROCESSING	129	0.352715	4.70031	0	0	0
GO_RESPONSE_TO_HEAT	161	0.316432	4.69719	0	0	0
GO_LEARNING	140	0.342059	4.6901	0	0	0
GO_ERAD_PATHWAY	91	0.41834	4.6852	0	0	0
GO_REGULATION_OF_TRANSLATIONAL_INITIATION	74	0.471948	4.68297	0	0	0
GO_LYSOSOMAL_TRANSPORT	98	0.402654	4.67835	0	0	0
GO_MRNA_EXPORT_FROM_NUCLEUS	103	0.39563	4.67824	0	0	0
GO_MEMBRANE_DOCKING	171	0.298882	4.655	0	0	0
GO_MRNA_TRANSPORT	137	0.346	4.64699	0	0	0
GO_PROTEIN_LOCALIZATION_TO_PLASMA_MEMBRANE	254	0.255979	4.63547	0	0	0
GO_NEGATIVE_REGULATION_OF_PHOSPHORYLATION	428	0.193906	4.63472	0	0	0
GO_CELL_CELL_SIGNALING_BY_WNT	495	0.182007	4.6285	0	0	0
GO_POSITIVE_REGULATION_OF_MULTI_ORGANISM_PROCESS	479	0.183386	4.62742	0	0	0
GO_ACTIN_FILAMENT_ORGANIZATION	368	0.210649	4.62739	0	0	0
GO_NEGATIVE_REGULATION_OF_CELL_DEVELOPMENT	306	0.224524	4.62292	0	0	0
GO_REGULATION_OF_APOPTOTIC_SIGNALING_PATHWAY	381	0.206101	4.60974	0	0	0
GO_REGULATION_OF_ACTIN_FILAMENT_BASED_PROCESS	357	0.20882	4.59657	0	0	0
GO_REGULATION_OF_PHOSPHATASE_ACTIVITY	165	0.302732	4.57654	0	0	0
GO_REGULATION_OF_RNA_SPLICING	128	0.348525	4.57579	0	0	0
GO_REGULATION_OF_POSTSYNAPSE_ORGANIZATION	97	0.390076	4.57182	0	0	0
GO_REGULATION_OF_PROTEIN_POLYMERIZATION	197	0.282233	4.56654	0	0	0
GO_VESICLE_TARGETING	89	0.408687	4.56349	0	0	0
GO_AXON_EXTENSION	121	0.355525	4.56232	0	0	0
GO_PHOSPHOLIPID_METABOLIC_PROCESS	407	0.196526	4.55159	0	0	0
GO_REGULATION_OF_DENDRITE_MORPHOGENESIS	91	0.404949	4.54713	0	0	0
GO_POSITIVE_REGULATION_OF_AXONOGENESIS	88	0.408946	4.544	0	0	0
GO_TRNA_METABOLIC_PROCESS	149	0.322586	4.53362	0	0	0
GO_NEGATIVE_REGULATION_OF_CATABOLIC_PROCESS	285	0.23093	4.52494	0	0	0
GO_ACTIN_POLYMERIZATION_OR_DEPOLYMERIZATION	185	0.29133	4.51515	0	0	0
GO_REGULATION_OF_CELL_SIZE	176	0.292629	4.50692	0	0	0
GO_GOLGI_VESICLE_BUDDING	76	0.43782	4.50594	0	0	0
GO_RESPONSE_TO_OXYGEN_LEVELS	371	0.205616	4.48818	0	0	0
GO_REGULATION_OF_SYNAPTIC_VESICLE_CYCLE	111	0.359039	4.48714	0	0	0
GO_RESPONSE_TO_OXIDATIVE_STRESS	405	0.193186	4.4867	0	0	0
GO_ELECTRON_TRANSPORT_CHAIN	160	0.305176	4.48351	0	0	0
GO_PURINE_CONTAINING_COMPOUND_METABOLIC_PROCESS	406	0.197638	4.48017	0	0	0
GO_REGULATION_OF_MRNA_SPLICING_VIA_SPLICEOSOME	95	0.396621	4.47877	0	0	0
GO_PURINE_CONTAINING_COMPOUND_BIOSYNTHETIC_PROCESS	166	0.294502	4.46521	0	0	0
GO_PROTEIN_TARGETING_TO_MEMBRANE	183	0.283262	4.46381	0	0	0
GO_PEPTIDYL_SERINE_MODIFICATION	298	0.220978	4.46297	0	0	0
GO_NEGATIVE_REGULATION_OF_CELL_PROJECTION_ORGANIZATION	170	0.295322	4.45968	0	0	0
GO_NEGATIVE_REGULATION_OF_CELLULAR_CATABOLIC_PROCESS	231	0.248099	4.45565	0	0	0
GO_NEGATIVE_REGULATION_OF_ORGANELLE_ORGANIZATION	349	0.212596	4.45231	0	0	0
GO_ANTEROGRADE_AXONAL_TRANSPORT	46	0.540422	4.42764	0	0	0
GO_PROTEIN_LOCALIZATION_TO_MITOCHONDRION	128	0.336004	4.41822	0	0	0
GO_PROTEIN_N_LINKED_GLYCOSYLATION	77	0.421779	4.41449	0	0	0
GO_VESICLE_CYTOSKELETAL_TRAFFICKING	50	0.525252	4.41163	0	0	0
GO_REGULATION_OF_INTRACELLULAR_PROTEIN_TRANSPORT	217	0.262898	4.40227	0	0	0
GO_POSITIVE_REGULATION_OF_PROTEIN_CONTAINING_COMPLEX_ASSEMBLY	224	0.258694	4.39296	0	0	0
GO_AUTOPHAGY_OF_MITOCHONDRION	68	0.444666	4.39025	0	0	0
GO_REGULATION_OF_DNA_TEMPLATED_TRANSCRIPTION_IN_RESPONSE_TO_STRESS	114	0.343669	4.3875	0	0	0
GO_CYTOKINESIS	142	0.312086	4.38661	0	0	0
GO_CELLULAR_RESPONSE_TO_HEAT	124	0.339698	4.38586	0	0	0
GO_NEGATIVE_REGULATION_OF_NEURON_PROJECTION_DEVELOPMENT	142	0.318227	4.37691	0	0	0
GO_POSITIVE_REGULATION_OF_CYTOSKELETON_ORGANIZATION	208	0.257235	4.36496	0	0	0
GO_VIRAL_GENE_EXPRESSION	185	0.279437	4.36148	0	0	0
GO_NUCLEOSIDE_PHOSPHATE_BIOSYNTHETIC_PROCESS	237	0.240473	4.35496	0	0	0
GO_CELL_CYCLE_G2_M_PHASE_TRANSITION	252	0.238439	4.34208	0	0	0
GO_COFACTOR_METABOLIC_PROCESS	396	0.187722	4.33692	0	0	0
GO_REGULATION_OF_SMALL_MOLECULE_METABOLIC_PROCESS	401	0.189973	4.33634	0	0	0
GO_ORGANELLE_FUSION	113	0.347332	4.32987	0	0	0
GO_RETROGRADE_TRANSPORT_ENDOSOME_TO_GOLGI	70	0.451424	4.32888	0	0	0
GO_REGULATION_OF_CHROMOSOME_ORGANIZATION	309	0.214174	4.32453	0	0	0
GO_POSITIVE_REGULATION_OF_CELLULAR_AMIDE_METABOLIC_PROCESS	143	0.310018	4.31935	0	0	0
GO_PEPTIDYL_LYSINE_MODIFICATION	356	0.199532	4.31852	0	0	0
GO_REGULATION_OF_ACTIN_FILAMENT_ORGANIZATION	236	0.246838	4.31817	0	0	0
GO_ORGANELLE_DISASSEMBLY	89	0.397475	4.30694	0	0	0
GO_MICROTUBULE_BASED_MOVEMENT	260	0.228055	4.30228	0	0	0
GO_CLATHRIN_DEPENDENT_ENDOCYTOSIS	40	0.562961	4.29613	0	0	0
GO_POSITIVE_REGULATION_OF_CELL_GROWTH	155	0.289994	4.27972	0	0	0
GO_ANAPHASE_PROMOTING_COMPLEX_DEPENDENT_CATABOLIC_PROCESS	80	0.404542	4.27639	0	0	0
GO_REGULATION_OF_LIPID_METABOLIC_PROCESS	385	0.185151	4.26348	0	0	0
GO_PROTEIN_IMPORT	178	0.278336	4.26051	0	0	0
GO_DENDRITIC_SPINE_DEVELOPMENT	93	0.37468	4.25187	0	0	0
GO_REGULATION_OF_EXTENT_OF_CELL_GROWTH	109	0.355927	4.25106	0	0	0
GO_INTERLEUKIN_1_MEDIATED_SIGNALING_PATHWAY	96	0.375452	4.23802	0	0	0
GO_GLIOGENESIS	278	0.219095	4.23497	0	0	0
GO_ESTABLISHMENT_OF_PROTEIN_LOCALIZATION_TO_ENDOPLASMIC_RETICULUM	106	0.344471	4.22397	0	0	0
GO_EPHRIN_RECEPTOR_SIGNALING_PATHWAY	85	0.394783	4.21809	0	0	0
GO_COPII_COATED_VESICLE_BUDDING	68	0.430674	4.21345	0	0	0
GO_VESICLE_MEDIATED_TRANSPORT_TO_THE_PLASMA_MEMBRANE	84	0.400898	4.21281	0	0	0
GO_NUCLEAR_TRANSCRIBED_MRNA_CATABOLIC_PROCESS_NONSENSE_MEDIATED_DECAY	118	0.333582	4.21273	0	0	0
GO_REGULATION_OF_PHOSPHOPROTEIN_PHOSPHATASE_ACTIVITY	109	0.351345	4.21157	0	0	0
GO_REGULATION_OF_SMALL_GTPASE_MEDIATED_SIGNAL_TRANSDUCTION	323	0.202183	4.20569	0	0	0
GO_ESTABLISHMENT_OR_MAINTENANCE_OF_CELL_POLARITY	213	0.244548	4.18303	0	0	0
GO_MRNA_3_END_PROCESSING	93	0.365849	4.17961	0	0	0
GO_CELLULAR_RESPONSE_TO_EXTERNAL_STIMULUS	310	0.206119	4.16565	0	0	0
GO_POSITIVE_REGULATION_OF_SUPRAMOLECULAR_FIBER_ORGANIZATION	186	0.265474	4.16495	0	0	0
GO_CELLULAR_RESPONSE_TO_DRUG	384	0.188656	4.16373	0	0	0
GO_ENDOPLASMIC_RETICULUM_UNFOLDED_PROTEIN_RESPONSE	114	0.332903	4.16298	0	0	0
GO_MITOCHONDRIAL_RESPIRATORY_CHAIN_COMPLEX_ASSEMBLY	84	0.387672	4.15939	0	0	0
GO_COFACTOR_BIOSYNTHETIC_PROCESS	214	0.239203	4.15371	0	0	0
GO_REGULATION_OF_RESPONSE_TO_BIOTIC_STIMULUS	451	0.170344	4.15207	0	0	0
GO_REGULATION_OF_HEMATOPOIETIC_PROGENITOR_CELL_DIFFERENTIATION	82	0.394059	4.15191	0	0	0
GO_PROTEIN_ACYLATION	230	0.232112	4.14715	0	0	0
GO_POSITIVE_REGULATION_OF_PROTEIN_MODIFICATION_BY_SMALL_PROTEIN_CONJUGATION_OR_REMOVAL	123	0.318906	4.1399	0	0	0
GO_REGULATION_OF_MICROTUBULE_BASED_PROCESS	212	0.245077	4.13978	0	0	0
GO_REGULATION_OF_MEMBRANE_POTENTIAL	406	0.177721	4.13215	0	0	0
GO_MITOCHONDRIAL_ELECTRON_TRANSPORT_NADH_TO_UBIQUINONE	46	0.51588	4.13207	0	0	0
GO_ACTIN_FILAMENT_POLYMERIZATION	158	0.279774	4.13188	0	0	0
GO_REGULATION_OF_PROTEIN_BINDING	212	0.25147	4.13079	0	0	0
GO_REGULATION_OF_BINDING	353	0.193199	4.12714	0	0	0
GO_VESICLE_DOCKING	61	0.447883	4.12009	0	0	0
GO_CYTOSKELETON_DEPENDENT_CYTOKINESIS	77	0.396816	4.11666	0	0	0
GO_REGULATION_OF_ORGANELLE_ASSEMBLY	182	0.261179	4.10755	0	0	0
GO_PHOSPHOLIPID_BIOSYNTHETIC_PROCESS	250	0.225672	4.09703	0	0	0
GO_TYPE_I_INTERFERON_PRODUCTION	117	0.32189	4.09566	0	0	0
GO_REGULATION_OF_EXOCYTOSIS	202	0.249549	4.09388	0	0	0
GO_UBIQUITIN_DEPENDENT_ERAD_PATHWAY	73	0.407023	4.09007	0	0	0
GO_CYTOPLASMIC_TRANSLATION	90	0.370113	4.08394	0	0	0
GO_AEROBIC_RESPIRATION	77	0.401298	4.08144	0	0	0
GO_CELLULAR_RESPONSE_TO_EXTRACELLULAR_STIMULUS	243	0.225662	4.0759	0	0	0
GO_NEURON_PROJECTION_ORGANIZATION	85	0.383062	4.07497	0	0	0
GO_REGULATION_OF_WNT_SIGNALING_PATHWAY	349	0.187953	4.07195	0	0	0
GO_RESPONSE_TO_AMMONIUM_ION	157	0.276502	4.06164	0	0	0
GO_NADH_DEHYDROGENASE_COMPLEX_ASSEMBLY	54	0.468795	4.06112	0	0	0
GO_DNA_REPAIR	485	0.161256	4.05932	0	0	0
GO_CHAPERONE_MEDIATED_PROTEIN_FOLDING	55	0.462208	4.05837	0	0	0
GO_ALTERNATIVE_MRNA_SPLICING_VIA_SPLICEOSOME	74	0.403951	4.05782	0	0	0
GO_REGULATION_OF_SYNAPTIC_PLASTICITY	182	0.25937	4.05636	0	0	0
GO_NEUROTRANSMITTER_TRANSPORT	260	0.215393	4.05401	0	0	0
GO_RESPONSE_TO_STARVATION	172	0.264214	4.05398	0	0	0
GO_SYNAPSE_ASSEMBLY	174	0.257539	4.05126	0	0	0
GO_POSITIVE_REGULATION_OF_INTRACELLULAR_TRANSPORT	197	0.244651	4.04973	0	0	0
GO_VESICLE_TARGETING_TO_FROM_OR_WITHIN_GOLGI	71	0.410577	4.04477	0	0	0
GO_IMMUNE_RESPONSE_REGULATING_CELL_SURFACE_RECEPTOR_SIGNALING_PATHWAY	330	0.190471	4.03418	0	0	0
GO_CELLULAR_RESPONSE_TO_CHEMICAL_STRESS	318	0.201182	4.03248	0	0	0
GO_GLYCEROPHOSPHOLIPID_METABOLIC_PROCESS	301	0.198223	4.03238	0	0	0
GO_MITOTIC_CYTOKINESIS	65	0.424254	4.02914	0	0	0
GO_NEGATIVE_REGULATION_OF_AUTOPHAGY	76	0.393345	4.02872	0	0	0
GO_MITOTIC_NUCLEAR_DIVISION	247	0.227875	4.02476	0	0	0
GO_SCF_DEPENDENT_PROTEASOMAL_UBIQUITIN_DEPENDENT_PROTEIN_CATABOLIC_PROCESS	92	0.349331	4.02343	0	0	0
GO_GLIAL_CELL_DIFFERENTIATION	209	0.241047	4.01929	0	0	0
GO_PROTEIN_LOCALIZATION_TO_VACUOLE	57	0.445334	4.01537	0	0	0
GO_VIRAL_LIFE_CYCLE	293	0.202529	4.01405	0	0	0
GO_REGULATION_OF_PROTEIN_LOCALIZATION_TO_MEMBRANE	176	0.25811	4.013	0	0	0
GO_PROTEIN_TARGETING_TO_MITOCHONDRION	93	0.354874	4.01255	0	0	0
GO_REGULATION_OF_PROTEIN_SERINE_THREONINE_KINASE_ACTIVITY	480	0.158581	4.00576	0	0	0
GO_RNA_MODIFICATION	139	0.285539	3.99652	0	0	0
GO_CELLULAR_RESPONSE_TO_OXYGEN_LEVELS	221	0.233427	3.99331	0	0	0
GO_POSITIVE_REGULATION_OF_AUTOPHAGY	109	0.330477	3.98908	0	0	0
GO_NEGATIVE_REGULATION_OF_MITOTIC_CELL_CYCLE	300	0.202845	3.98881	0	0	0
GO_NUCLEUS_ORGANIZATION	122	0.30523	3.97993	0	0	0
GO_PEPTIDYL_THREONINE_MODIFICATION	116	0.317161	3.97867	0	0	0
GO_ENDOSOME_ORGANIZATION	70	0.404948	3.97762	0	0	0
GO_SULFUR_COMPOUND_METABOLIC_PROCESS	341	0.18616	3.97734	0	0	0
GO_ANTIGEN_PROCESSING_AND_PRESENTATION_OF_PEPTIDE_OR_POLYSACCHARIDE_ANTIGEN_VIA_MHC_CLASS_II	82	0.369704	3.97613	0	0	0
GO_SPHINGOLIPID_METABOLIC_PROCESS	150	0.27418	3.97414	0	0	0
GO_SULFUR_COMPOUND_BIOSYNTHETIC_PROCESS	180	0.256264	3.97155	0	0	0
GO_REGULATION_OF_CELL_CYCLE_G2_M_PHASE_TRANSITION	198	0.245133	3.97124	0	0	0
GO_REGULATION_OF_CELLULAR_AMINO_ACID_METABOLIC_PROCESS	60	0.428752	3.96159	0	0	0
GO_NEURON_APOPTOTIC_PROCESS	227	0.229621	3.95403	0	0	0
GO_ACTIVATION_OF_INNATE_IMMUNE_RESPONSE	282	0.200152	3.95046	0	0	0
GO_PROTEIN_TARGETING_TO_VACUOLE	37	0.544638	3.94945	0	0	0
GO_POSITIVE_REGULATION_OF_MITOCHONDRION_ORGANIZATION	107	0.322022	3.94718	0	0	0
GO_SPINDLE_ORGANIZATION	156	0.27405	3.94669	0	0	0
GO_ANTIGEN_PROCESSING_AND_PRESENTATION_OF_PEPTIDE_ANTIGEN_VIA_MHC_CLASS_I	87	0.369693	3.94605	0	0	0
GO_IMMUNE_RESPONSE_REGULATING_SIGNALING_PATHWAY	489	0.156259	3.94444	0	0	0
GO_RNA_PHOSPHODIESTER_BOND_HYDROLYSIS	138	0.279545	3.94161	0	0	0
GO_REGULATION_OF_NEUROTRANSMITTER_LEVELS	336	0.191595	3.93488	0	0	0
GO_RESPONSE_TO_EXTRACELLULAR_STIMULUS	491	0.155038	3.93041	0	0	0
GO_RIBOSOMAL_SMALL_SUBUNIT_BIOGENESIS	63	0.420977	3.92976	0	0	0
GO_MICROTUBULE_CYTOSKELETON_ORGANIZATION_INVOLVED_IN_MITOSIS	127	0.30003	3.92853	0	0	0
GO_APOPTOTIC_MITOCHONDRIAL_CHANGES	110	0.317797	3.92469	0	0	0
GO_HEMATOPOIETIC_PROGENITOR_CELL_DIFFERENTIATION	157	0.269332	3.92224	0	0	0
GO_REGULATION_OF_CELL_SHAPE	149	0.281583	3.91429	0	0	0
GO_ANTIGEN_PROCESSING_AND_PRESENTATION_OF_EXOGENOUS_PEPTIDE_ANTIGEN_VIA_MHC_CLASS_I	69	0.393858	3.91404	0	0	0
GO_DNA_TEMPLATED_TRANSCRIPTION_ELONGATION	101	0.342559	3.91402	0	0	0
GO_HEMATOPOIETIC_STEM_CELL_DIFFERENTIATION	81	0.367205	3.91222	0	0	0
GO_RECEPTOR_MEDIATED_ENDOCYTOSIS	242	0.215702	3.90938	0	0	0
GO_SYNAPTIC_VESICLE_RECYCLING	66	0.402382	3.89698	0	0	0
GO_REGULATION_OF_ENDOCYTOSIS	199	0.238786	3.89628	0	0	0
GO_PROTEIN_AUTOPHOSPHORYLATION	228	0.22144	3.89385	0	0	0
GO_EXOCYTIC_PROCESS	79	0.36459	3.89299	0	0	0
GO_NEGATIVE_REGULATION_OF_TRANSPORT	453	0.158167	3.89036	0	0	0
GO_OLIGODENDROCYTE_DIFFERENTIATION	91	0.348647	3.8813	0	0	0
GO_REGULATION_OF_TRANSCRIPTION_FROM_RNA_POLYMERASE_II_PROMOTER_IN_RESPONSE_TO_HYPOXIA	73	0.387938	3.877	0	0	0
GO_CELLULAR_RESPONSE_TO_STARVATION	132	0.292269	3.87609	0	0	0
GO_POSITIVE_REGULATION_OF_AXON_EXTENSION	45	0.490389	3.86422	0	0	0
GO_NON_CANONICAL_WNT_SIGNALING_PATHWAY	149	0.266069	3.86177	0	0	0
GO_REGULATION_OF_STEM_CELL_DIFFERENTIATION	113	0.313914	3.85145	0	0	0
GO_REGULATION_OF_GENE_EXPRESSION_EPIGENETIC	353	0.175926	3.84371	0	0	0
GO_PROTEIN_DNA_COMPLEX_SUBUNIT_ORGANIZATION	199	0.231609	3.83983	0	0	0
GO_REGULATION_OF_RAS_PROTEIN_SIGNAL_TRANSDUCTION	226	0.224376	3.83111	0	0	0
GO_POSITIVE_REGULATION_OF_CANONICAL_WNT_SIGNALING_PATHWAY	142	0.276782	3.82835	0	0	0
GO_PHOSPHATIDYLINOSITOL_BIOSYNTHETIC_PROCESS	113	0.314164	3.82649	0	0	0
GO_DE_NOVO_PROTEIN_FOLDING	35	0.537175	3.82322	0	0	0
GO_SYNAPTIC_VESICLE_LOCALIZATION	57	0.416667	3.81195	0	0	0
GO_MEMBRANE_LIPID_METABOLIC_PROCESS	196	0.230168	3.81061	0	0	0
GO_NEGATIVE_REGULATION_OF_TRANSFERASE_ACTIVITY	263	0.204022	3.80902	0	0	0
GO_POSITIVE_REGULATION_OF_WNT_SIGNALING_PATHWAY	175	0.242842	3.80714	0	0	0
GO_SIGNAL_RELEASE	440	0.156573	3.80607	0	0	0
GO_MATURATION_OF_SSU_RRNA	44	0.483731	3.80372	0	0	0
GO_INNATE_IMMUNE_RESPONSE_ACTIVATING_CELL_SURFACE_RECEPTOR_SIGNALING_PATHWAY	96	0.331291	3.7984	0	0	0
GO_REGULATION_OF_MITOCHONDRIAL_MEMBRANE_POTENTIAL	63	0.409651	3.79802	0	0	0
GO_COTRANSLATIONAL_PROTEIN_TARGETING_TO_MEMBRANE	95	0.323761	3.78515	0	0	0
GO_POSITIVE_REGULATION_OF_ESTABLISHMENT_OF_PROTEIN_LOCALIZATION	419	0.16243	3.78316	0	0	0
GO_STRESS_ACTIVATED_PROTEIN_KINASE_SIGNALING_CASCADE	266	0.197315	3.77062	0	0	0
GO_NEGATIVE_REGULATION_OF_CELL_CYCLE_PROCESS	310	0.189195	3.76933	0	0	0
GO_CANONICAL_WNT_SIGNALING_PATHWAY	321	0.178701	3.76879	0	0	0
GO_MACROMOLECULE_DEACYLATION	96	0.324881	3.76634	0	0	0
GO_NEURON_PROJECTION_GUIDANCE	274	0.197388	3.76561	0	0	0
GO_AGING	292	0.188279	3.76058	0	0	0
GO_DENDRITIC_SPINE_MORPHOGENESIS	58	0.409643	3.75814	0	0	0
GO_POSITIVE_REGULATION_OF_I_KAPPAB_KINASE_NF_KAPPAB_SIGNALING	163	0.256742	3.7578	0	0	0
GO_POSITIVE_REGULATION_OF_TYPE_I_INTERFERON_PRODUCTION	73	0.369874	3.75681	0	0	0
GO_IRE1_MEDIATED_UNFOLDED_PROTEIN_RESPONSE	60	0.41124	3.7455	0	0	0
GO_NEGATIVE_REGULATION_OF_NEURON_DEATH	196	0.22842	3.74435	0	0	0
GO_REGULATION_OF_CELLULAR_RESPONSE_TO_HEAT	76	0.362911	3.73822	0	0	0
GO_POSITIVE_REGULATION_OF_RESPONSE_TO_BIOTIC_STIMULUS	349	0.170148	3.73095	0	0	0
GO_REGULATION_OF_CELLULAR_AMINE_METABOLIC_PROCESS	77	0.359577	3.72845	0	0	0
GO_NUCLEIC_ACID_PHOSPHODIESTER_BOND_HYDROLYSIS	272	0.191832	3.72824	0	0	0
GO_NEGATIVE_REGULATION_OF_CANONICAL_WNT_SIGNALING_PATHWAY	174	0.240849	3.72646	0	0	0
GO_CELL_JUNCTION_ASSEMBLY	238	0.20432	3.72509	0	0	0
GO_TRNA_PROCESSING	112	0.299821	3.72423	0	0	0
GO_DNA_TEMPLATED_TRANSCRIPTION_INITIATION	227	0.2128	3.72154	0	0	0
GO_ACTIN_FILAMENT_BUNDLE_ORGANIZATION	155	0.2579	3.719	0	0	0
GO_REGULATION_OF_ESTABLISHMENT_OF_PLANAR_POLARITY	110	0.305551	3.71412	0	0	0
GO_PROTEIN_LOCALIZATION_TO_SYNAPSE	83	0.3533	3.71017	0	0	0
GO_POSITIVE_REGULATION_OF_TRANSLATION	118	0.291197	3.70647	0	0	0
GO_REGULATION_OF_RESPONSE_TO_ENDOPLASMIC_RETICULUM_STRESS	81	0.360672	3.70631	0	0	0
GO_POSITIVE_REGULATION_OF_PROTEIN_POLYMERIZATION	120	0.29228	3.70313	0	0	0
GO_MEMBRANE_FUSION	132	0.273765	3.70307	0	0	0
GO_GOLGI_TO_PLASMA_MEMBRANE_TRANSPORT	55	0.419083	3.69983	0	0	0
GO_NEGATIVE_REGULATION_OF_CELL_CYCLE_PHASE_TRANSITION	229	0.21037	3.6953	0	0	0
GO_NEUROTRANSMITTER_SECRETION	164	0.24776	3.68834	0	0	0
GO_NEGATIVE_REGULATION_OF_KINASE_ACTIVITY	237	0.206748	3.68709	0	0	0
GO_IMPORT_INTO_NUCLEUS	150	0.2607	3.68655	0	0	0
GO_TRANSCRIPTION_BY_RNA_POLYMERASE_III	51	0.433117	3.68636	0	0	0
GO_I_KAPPAB_KINASE_NF_KAPPAB_SIGNALING	246	0.200341	3.6827	0	0	0
GO_PROTEIN_COMPLEX_OLIGOMERIZATION	435	0.15405	3.68037	0	0	0
GO_TRANSCRIPTION_BY_RNA_POLYMERASE_I	59	0.410495	3.67585	0	0	0
GO_REGULATION_OF_DENDRITIC_SPINE_DEVELOPMENT	71	0.374908	3.66896	0	0	0
GO_RIBOSOMAL_LARGE_SUBUNIT_BIOGENESIS	61	0.402159	3.66587	0	0	0
GO_POSITIVE_REGULATION_OF_INTRACELLULAR_PROTEIN_TRANSPORT	149	0.252932	3.66545	0	0	0
GO_FOREBRAIN_DEVELOPMENT	369	0.160642	3.66195	0	0	0
GO_POSITIVE_REGULATION_OF_MACROAUTOPHAGY	61	0.390786	3.66075	0	0	0
GO_PHAGOCYTOSIS	241	0.198414	3.65878	0	0	0
GO_MAINTENANCE_OF_LOCATION	315	0.174289	3.6578	0	0	0
GO_ESTABLISHMENT_OF_PROTEIN_LOCALIZATION_TO_VACUOLE	46	0.451246	3.65676	0	0	0
GO_CELL_CYCLE_ARREST	221	0.211516	3.65119	0	0	0
GO_SYNAPTIC_VESICLE_ENDOCYTOSIS	54	0.424102	3.64987	0	0	0
GO_ASSOCIATIVE_LEARNING	75	0.360346	3.63779	0	0	0
GO_RESPONSE_TO_NERVE_GROWTH_FACTOR	51	0.423765	3.63772	0	0	0
GO_GLIAL_CELL_DEVELOPMENT	110	0.295736	3.6356	0	0	0
GO_RESPONSE_TO_AMINO_ACID	106	0.304346	3.6281	0	0	0
GO_MITOCHONDRIAL_MEMBRANE_ORGANIZATION	101	0.307779	3.62243	0	0	0
GO_ORGANELLE_MEMBRANE_FUSION	89	0.329809	3.62081	0	0	0
GO_VESICLE_DOCKING_INVOLVED_IN_EXOCYTOSIS	44	0.460868	3.62078	0	0	0
GO_EXTRINSIC_APOPTOTIC_SIGNALING_PATHWAY	211	0.215826	3.61787	0	0	0
GO_PROTEIN_K48_LINKED_DEUBIQUITINATION	29	0.54853	3.61407	0	0	0
GO_RESPONSE_TO_PEPTIDE	487	0.142135	3.61361	0	0	0
GO_CELLULAR_RESPONSE_TO_AMMONIUM_ION	111	0.291113	3.6054	0	0	0
GO_REGULATION_OF_CATION_TRANSMEMBRANE_TRANSPORT	315	0.175834	3.60405	0	0	0
GO_FC_RECEPTOR_MEDIATED_STIMULATORY_SIGNALING_PATHWAY	80	0.344969	3.60404	0	0	0
GO_TELENCEPHALON_DEVELOPMENT	241	0.200971	3.59918	0	0	0
GO_PEPTIDYL_LYSINE_ACETYLATION	158	0.244934	3.59732	0	0	0
GO_MICROTUBULE_POLYMERIZATION_OR_DEPOLYMERIZATION	108	0.296363	3.59506	0	0	0
GO_T_CELL_RECEPTOR_SIGNALING_PATHWAY	168	0.237183	3.59232	0	0	0
GO_MORPHOGENESIS_OF_A_POLARIZED_EPITHELIUM	139	0.263831	3.59116	0	0	0
GO_REGULATION_OF_CELLULAR_KETONE_METABOLIC_PROCESS	167	0.237172	3.58135	0	0	0
GO_TRANSCRIPTION_COUPLED_NUCLEOTIDE_EXCISION_REPAIR	72	0.361077	3.58118	0	0	0
GO_ACTIVATION_OF_PROTEIN_KINASE_ACTIVITY	313	0.177428	3.58064	0	0	0
GO_POSITIVE_REGULATION_OF_MRNA_METABOLIC_PROCESS	76	0.35222	3.58007	0	0	0
GO_REGULATION_OF_ION_TRANSMEMBRANE_TRANSPORT	449	0.148919	3.57791	0	0	0
GO_POSITIVE_REGULATION_OF_CHROMOSOME_ORGANIZATION	163	0.235722	3.57699	0	0	0
GO_NEGATIVE_REGULATION_OF_PROTEIN_CONTAINING_COMPLEX_ASSEMBLY	122	0.280563	3.57685	0	0	0
GO_OLIGODENDROCYTE_DEVELOPMENT	41	0.470305	3.57644	0	0	0
GO_SIGNAL_TRANSDUCTION_BY_P53_CLASS_MEDIATOR	246	0.198863	3.57524	0	0	0
GO_CELLULAR_RESPONSE_TO_PEPTIDE	356	0.162591	3.57521	0	0	0
GO_PHOSPHATIDYLINOSITOL_METABOLIC_PROCESS	167	0.240398	3.57078	0	0	0
GO_SPLICEOSOMAL_COMPLEX_ASSEMBLY	55	0.413851	3.56502	0	0	0
GO_ESTABLISHMENT_OF_CELL_POLARITY	133	0.264344	3.56462	0	0	0
GO_MITOTIC_SPINDLE_ORGANIZATION	101	0.295746	3.56461	0	0	0
GO_REGULATION_OF_NEUROTRANSMITTER_TRANSPORT	137	0.264028	3.56295	0	0	0
GO_REGULATION_OF_PROTEIN_LOCALIZATION_TO_NUCLEUS	113	0.28404	3.5614	0	0	0
GO_REGULATION_OF_DENDRITIC_SPINE_MORPHOGENESIS	45	0.438078	3.55532	0	0	0
GO_CELL_JUNCTION_ORGANIZATION	284	0.183259	3.54648	0	0	0
GO_REGULATION_OF_POSTSYNAPTIC_MEMBRANE_NEUROTRANSMITTER_RECEPTOR_LEVELS	69	0.351782	3.54573	0	0	0
GO_POSITIVE_REGULATION_OF_GROWTH	247	0.196132	3.54391	0	0	0
GO_NEGATIVE_REGULATION_OF_CELL_MORPHOGENESIS_INVOLVED_IN_DIFFERENTIATION	93	0.318933	3.53993	0	0	0
GO_SYNAPTIC_VESICLE_EXOCYTOSIS	114	0.28587	3.53551	0	0	0
GO_CELLULAR_KETONE_METABOLIC_PROCESS	226	0.199771	3.51947	0	0	0
GO_ACTIN_NUCLEATION	43	0.454505	3.51725	0	0	0
GO_GLYCEROLIPID_BIOSYNTHETIC_PROCESS	238	0.195753	3.51369	0	0	0
GO_VIRION_ASSEMBLY	37	0.479685	3.51197	0	0	0
GO_REGULATION_OF_DEVELOPMENTAL_GROWTH	318	0.170649	3.51085	0	0	0
GO_NEURON_MIGRATION	153	0.243332	3.50999	0	0	0
GO_POSITIVE_REGULATION_OF_APOPTOTIC_SIGNALING_PATHWAY	167	0.230686	3.50632	0	0	0
GO_NEGATIVE_REGULATION_OF_CELLULAR_AMIDE_METABOLIC_PROCESS	171	0.233342	3.50591	0	0	0
GO_DNA_TEMPLATED_TRANSCRIPTION_TERMINATION	71	0.345935	3.50296	0	0	0
GO_REGULATION_OF_DNA_METABOLIC_PROCESS	305	0.173806	3.5028	0	0	0
GO_POSITIVE_REGULATION_OF_NEURON_DEATH	90	0.307839	3.5014	0	0	0
GO_POSITIVE_REGULATION_OF_VIRAL_PROCESS	97	0.305589	3.50027	0	0	0
GO_RIBONUCLEOSIDE_TRIPHOSPHATE_METABOLIC_PROCESS	55	0.392427	3.49765	0	0	0
GO_NEGATIVE_REGULATION_OF_PROTEIN_CATABOLIC_PROCESS	123	0.270276	3.48652	0	0	0
GO_LOCALIZATION_WITHIN_MEMBRANE	90	0.312627	3.48286	0	0	0
GO_AMYLOID_PRECURSOR_PROTEIN_METABOLIC_PROCESS	61	0.373241	3.47599	0	0	0
GO_CEREBRAL_CORTEX_DEVELOPMENT	109	0.288943	3.47525	0	0	0
GO_RIBONUCLEOSIDE_MONOPHOSPHATE_METABOLIC_PROCESS	46	0.431729	3.46047	0	0	0
GO_RECEPTOR_METABOLIC_PROCESS	187	0.216662	3.45971	0	0	0
GO_LIPID_MODIFICATION	225	0.200589	3.45853	0	0	0
GO_CHAPERONE_COFACTOR_DEPENDENT_PROTEIN_REFOLDING	27	0.551587	3.45757	0	0	0
GO_MITOTIC_SISTER_CHROMATID_SEGREGATION	138	0.254493	3.45602	0	0	0
GO_REGULATION_OF_TELOMERE_MAINTENANCE	75	0.335543	3.4501	0	0	0
GO_NUCLEOSIDE_TRIPHOSPHATE_METABOLIC_PROCESS	80	0.327979	3.44289	0	0	0
GO_NEGATIVE_REGULATION_OF_MACROAUTOPHAGY	30	0.526243	3.44239	0	0	0
GO_REGULATION_OF_PROTEIN_CONTAINING_COMPLEX_DISASSEMBLY	106	0.281528	3.43533	0	0	0
GO_FOCAL_ADHESION_ASSEMBLY	82	0.311818	3.43205	0	0	0
GO_RESPONSE_TO_PEPTIDE_HORMONE	408	0.146454	3.43165	0	0	0
GO_INTRACELLULAR_STEROID_HORMONE_RECEPTOR_SIGNALING_PATHWAY	119	0.274591	3.43027	0	0	0
GO_RNA_DEPENDENT_DNA_BIOSYNTHETIC_PROCESS	67	0.350068	3.42908	0	0	0
GO_CYTOPLASMIC_TRANSLATIONAL_INITIATION	27	0.566157	3.42906	0	0	0
GO_REGULATION_OF_CELL_SUBSTRATE_ADHESION	196	0.212105	3.42484	0	0	0
GO_REGULATION_OF_TOR_SIGNALING	85	0.318116	3.42422	0	0	0
GO_NEGATIVE_REGULATION_OF_APOPTOTIC_SIGNALING_PATHWAY	218	0.200459	3.42388	0	0	0
GO_REGULATION_OF_AUTOPHAGOSOME_ASSEMBLY	33	0.5034	3.42158	0	0	0
GO_VIRAL_BUDDING	24	0.583119	3.41907	0	0	0
GO_CONTRACTILE_ACTIN_FILAMENT_BUNDLE_ASSEMBLY	96	0.294672	3.40848	0	0	0
GO_RESPONSE_TO_ANTIBIOTIC	299	0.173106	3.4039	0	0	0
GO_RIBOSOME_ASSEMBLY	55	0.381678	3.40009	0	0	0
GO_NEGATIVE_REGULATION_OF_WNT_SIGNALING_PATHWAY	203	0.201191	3.39701	0	0	0
GO_REGULATION_OF_CELL_SUBSTRATE_JUNCTION_ASSEMBLY	61	0.367654	3.39639	0	0	0
GO_TOR_SIGNALING	103	0.287277	3.39352	0	0	0
GO_REGULATION_OF_VACUOLE_ORGANIZATION	39	0.466175	3.39053	0	0	0
GO_PALLIUM_DEVELOPMENT	164	0.223651	3.38512	0	0	0
GO_REGULATION_OF_ERAD_PATHWAY	29	0.535171	3.38385	0	3.15944e-06	0.001
GO_PROTEIN_TRANSPORT_ALONG_MICROTUBULE	66	0.349139	3.37924	0	3.15278e-06	0.001
GO_POSITIVE_REGULATION_OF_MAPK_CASCADE	493	0.134921	3.37591	0	3.14614e-06	0.001
GO_SELECTIVE_AUTOPHAGY	43	0.433097	3.36675	0	3.13953e-06	0.001
GO_ARP2_3_COMPLEX_MEDIATED_ACTIN_NUCLEATION	31	0.507596	3.36177	0	3.13295e-06	0.001
GO_REGULATION_OF_CELL_PROJECTION_ASSEMBLY	162	0.226459	3.35557	0	3.12639e-06	0.001
GO_REGULATION_OF_MITOCHONDRIAL_OUTER_MEMBRANE_PERMEABILIZATION_INVOLVED_IN_APOPTOTIC_SIGNALING_PATHWAY	39	0.453618	3.35491	0	3.11987e-06	0.001
GO_SISTER_CHROMATID_SEGREGATION	167	0.221037	3.3466	0	3.11337e-06	0.001
GO_GENE_SILENCING_BY_RNA	231	0.185606	3.33711	0	3.10689e-06	0.001
GO_INTRINSIC_APOPTOTIC_SIGNALING_PATHWAY	263	0.176093	3.33692	0	3.10045e-06	0.001
GO_NEGATIVE_REGULATION_OF_MITOCHONDRION_ORGANIZATION	53	0.390209	3.33497	0	3.09403e-06	0.001
GO_RESPONSE_TO_AMINO_ACID_STARVATION	44	0.422524	3.33253	0	3.08764e-06	0.001
GO_RHO_PROTEIN_SIGNAL_TRANSDUCTION	191	0.204404	3.33178	0	3.08127e-06	0.001
GO_PROTEIN_ACETYLATION	188	0.211796	3.33146	0	3.07493e-06	0.001
GO_NCRNA_TRANSCRIPTION	97	0.294747	3.33044	0	3.06862e-06	0.001
GO_SYNAPTIC_VESICLE_TRANSPORT	44	0.432802	3.32852	0	3.06233e-06	0.001
GO_NIK_NF_KAPPAB_SIGNALING	163	0.220838	3.31423	0	3.05607e-06	0.001
GO_REGULATION_OF_AUTOPHAGY_OF_MITOCHONDRION	37	0.455659	3.31235	0	3.04983e-06	0.001
GO_RESPONSE_TO_RADIATION	406	0.144288	3.30946	0	3.04362e-06	0.001
GO_PROTEIN_LOCALIZATION_TO_LYSOSOME	33	0.472621	3.30725	0	3.03743e-06	0.001
GO_SPLICEOSOMAL_SNRNP_ASSEMBLY	37	0.462501	3.30677	0	3.03127e-06	0.001
GO_POSITIVE_REGULATION_OF_DENDRITE_DEVELOPMENT	71	0.332786	3.30579	0	3.02513e-06	0.001
GO_NEGATIVE_REGULATION_OF_NEURON_APOPTOTIC_PROCESS	141	0.239029	3.3051	0	3.01902e-06	0.001
GO_MICROTUBULE_POLYMERIZATION	72	0.337683	3.30374	0	3.01294e-06	0.001
GO_CELLULAR_RESPONSE_TO_STEROID_HORMONE_STIMULUS	235	0.182723	3.30144	0	3.00687e-06	0.001
GO_RNA_PHOSPHODIESTER_BOND_HYDROLYSIS_ENDONUCLEOLYTIC	66	0.344708	3.30125	0	3.00084e-06	0.001
GO_RESPONSE_TO_INSULIN	258	0.177542	3.28505	0	2.99482e-06	0.001
GO_REGULATION_OF_SYMBIOSIS_ENCOMPASSING_MUTUALISM_THROUGH_PARASITISM	193	0.206806	3.28386	0	2.98883e-06	0.001
GO_NUCLEAR_ENVELOPE_ORGANIZATION	50	0.3944	3.28365	0	2.98287e-06	0.001
GO_PROTEIN_LOCALIZATION_TO_CYTOSKELETON	57	0.369009	3.28315	0	2.97692e-06	0.001
GO_NUCLEOTIDE_EXCISION_REPAIR	105	0.265139	3.27683	0	2.97101e-06	0.001
GO_REGULATION_OF_SYNAPTIC_VESICLE_EXOCYTOSIS	77	0.318861	3.27571	0	2.96511e-06	0.001
GO_RESPONSE_TO_CATECHOLAMINE	91	0.301461	3.27491	0	2.95924e-06	0.001
GO_MATURATION_OF_SSU_RRNA_FROM_TRICISTRONIC_RRNA_TRANSCRIPT_SSU_RRNA_5_8S_RRNA_LSU_RRNA	32	0.486314	3.27389	0	2.95339e-06	0.001
GO_COENZYME_METABOLIC_PROCESS	240	0.182247	3.26507	0	2.94757e-06	0.001
GO_ACIDIC_AMINO_ACID_TRANSPORT	66	0.336043	3.26428	0	2.94176e-06	0.001
GO_CELL_CYCLE_G1_S_PHASE_TRANSITION	258	0.175411	3.26242	0	2.93598e-06	0.001
GO_RECEPTOR_LOCALIZATION_TO_SYNAPSE	56	0.375492	3.25998	0	2.93023e-06	0.001
GO_ESTABLISHMENT_OF_PROTEIN_LOCALIZATION_TO_PLASMA_MEMBRANE	56	0.367022	3.25487	0	2.92449e-06	0.001
GO_GLYCOSYL_COMPOUND_METABOLIC_PROCESS	104	0.275116	3.25479	0	2.91878e-06	0.001
GO_LOCOMOTORY_BEHAVIOR	186	0.208089	3.24541	0	2.91309e-06	0.001
GO_POSITIVE_REGULATION_OF_DENDRITE_MORPHOGENESIS	39	0.426288	3.24522	0	2.90742e-06	0.001
GO_MODIFICATION_OF_SYNAPTIC_STRUCTURE	22	0.5859	3.24451	0	2.90178e-06	0.001
GO_NEGATIVE_REGULATION_OF_AXONOGENESIS	67	0.340151	3.24392	0	2.89616e-06	0.001
GO_NEGATIVE_REGULATION_OF_PROTEIN_MODIFICATION_BY_SMALL_PROTEIN_CONJUGATION_OR_REMOVAL	81	0.309162	3.23841	0	2.89055e-06	0.001
GO_AMINO_ACID_TRANSPORT	138	0.241023	3.23789	0	2.88497e-06	0.001
GO_POSITIVE_REGULATION_OF_SYNAPTIC_TRANSMISSION	158	0.222949	3.23133	0	2.87941e-06	0.001
GO_POSITIVE_REGULATION_OF_ACTIN_FILAMENT_POLYMERIZATION	86	0.288762	3.22975	0	2.87388e-06	0.001
GO_SUBSTANTIA_NIGRA_DEVELOPMENT	35	0.457353	3.22921	0	2.86836e-06	0.001
GO_TRICARBOXYLIC_ACID_CYCLE	33	0.467611	3.22639	0	2.86287e-06	0.001
GO_TRANSCRIPTION_ELONGATION_FROM_RNA_POLYMERASE_II_PROMOTER	74	0.317527	3.22576	0	2.85739e-06	0.001
GO_REGULATION_OF_TRANSPORTER_ACTIVITY	262	0.173876	3.22224	0	2.85194e-06	0.001
GO_REGULATION_OF_ESTABLISHMENT_OF_PROTEIN_LOCALIZATION_TO_MITOCHONDRION	65	0.34448	3.21858	0	2.84651e-06	0.001
GO_RESPONSE_TO_INTERLEUKIN_1	184	0.204586	3.21686	0	2.8411e-06	0.001
GO_RUFFLE_ORGANIZATION	49	0.39183	3.21484	0	2.8357e-06	0.001
GO_PROTEIN_DEPOLYMERIZATION	103	0.273013	3.21257	0	2.83033e-06	0.001
GO_REGULATION_OF_FILOPODIUM_ASSEMBLY	41	0.416968	3.20832	0	5.66004e-06	0.002
GO_NEUROTRANSMITTER_RECEPTOR_TRANSPORT	48	0.383664	3.20741	0	5.64936e-06	0.002
GO_MULTI_ORGANISM_LOCALIZATION	56	0.369866	3.20602	0	5.63872e-06	0.002
GO_HISTONE_DEACETYLATION	69	0.329146	3.204	0	5.62812e-06	0.002
GO_AMYLOID_PRECURSOR_PROTEIN_CATABOLIC_PROCESS	44	0.410659	3.20295	0	5.61756e-06	0.002
GO_REGULATION_OF_SIGNAL_TRANSDUCTION_BY_P53_CLASS_MEDIATOR	164	0.21391	3.20237	0	5.60704e-06	0.002
GO_RESPONSE_TO_IONIZING_RADIATION	132	0.239497	3.20226	0	5.59656e-06	0.002
GO_MONOSACCHARIDE_METABOLIC_PROCESS	260	0.17491	3.20131	0	5.58612e-06	0.002
GO_NEGATIVE_REGULATION_OF_CELL_CYCLE_G2_M_PHASE_TRANSITION	92	0.287432	3.20056	0	5.57572e-06	0.002
GO_SNARE_COMPLEX_ASSEMBLY	16	0.652353	3.19843	0	5.56536e-06	0.002
GO_REGULATION_OF_RESPONSE_TO_DNA_DAMAGE_STIMULUS	195	0.19087	3.19639	0	5.55503e-06	0.002
GO_NEGATIVE_REGULATION_OF_DEPHOSPHORYLATION	104	0.266589	3.1844	0	5.54474e-06	0.002
GO_NEGATIVE_REGULATION_OF_SUPRAMOLECULAR_FIBER_ORGANIZATION	128	0.237562	3.18428	0	5.53449e-06	0.002
GO_MULTIVESICULAR_BODY_ORGANIZATION	30	0.483141	3.18104	0	5.52428e-06	0.002
GO_REGULATION_OF_RECEPTOR_MEDIATED_ENDOCYTOSIS	97	0.275914	3.17921	0	5.51411e-06	0.002
GO_NEGATIVE_REGULATION_OF_SYNAPTIC_TRANSMISSION	69	0.321055	3.17792	0	5.50397e-06	0.002
GO_ENDOSOME_TO_LYSOSOME_TRANSPORT	51	0.367702	3.17448	0	5.49387e-06	0.002
GO_INTRACELLULAR_RECEPTOR_SIGNALING_PATHWAY	259	0.173815	3.17319	0	5.48381e-06	0.002
GO_NUCLEOSIDE_BISPHOSPHATE_BIOSYNTHETIC_PROCESS	64	0.338756	3.17125	0	5.47379e-06	0.002
GO_HISTONE_H4_ACETYLATION	64	0.332955	3.1679	0	8.1675e-06	0.003
GO_GLUTAMATE_RECEPTOR_SIGNALING_PATHWAY	98	0.271113	3.16617	0	8.15263e-06	0.003
GO_DNA_CONFORMATION_CHANGE	228	0.182616	3.16151	0	8.1378e-06	0.003
GO_ANDROGEN_RECEPTOR_SIGNALING_PATHWAY	57	0.35142	3.16081	0	8.12304e-06	0.003
GO_POSITIVE_REGULATION_OF_INTERFERON_BETA_PRODUCTION	30	0.483841	3.16024	0	8.10832e-06	0.003
GO_REGULATION_OF_MAP_KINASE_ACTIVITY	320	0.154807	3.15935	0	8.09366e-06	0.003
GO_GLYCEROLIPID_METABOLIC_PROCESS	387	0.141306	3.15742	0	8.07905e-06	0.003
GO_CHROMOSOME_SEGREGATION	289	0.163284	3.1562	0	8.06449e-06	0.003
GO_REGULATION_OF_CATION_CHANNEL_ACTIVITY	166	0.207496	3.1529	0	8.04999e-06	0.003
GO_PROTEIN_MONOUBIQUITINATION	63	0.336211	3.14993	0	8.03553e-06	0.003
GO_CELLULAR_RESPONSE_TO_PEPTIDE_HORMONE_STIMULUS	296	0.161952	3.14977	0	8.02113e-06	0.003
GO_REGULATION_OF_EXTRINSIC_APOPTOTIC_SIGNALING_PATHWAY	149	0.220845	3.14854	0	8.00678e-06	0.003
GO_NUCLEAR_TRANSCRIBED_MRNA_CATABOLIC_PROCESS_DEADENYLATION_DEPENDENT_DECAY	68	0.324919	3.14235	0	7.99249e-06	0.003
GO_SMOOTH_MUSCLE_CELL_MIGRATION	73	0.31299	3.14122	0	7.97824e-06	0.003
GO_MEMORY	116	0.245712	3.13923	0	7.96404e-06	0.003
GO_STEROID_HORMONE_MEDIATED_SIGNALING_PATHWAY	170	0.201295	3.13807	0	7.9499e-06	0.003
GO_RESPONSE_TO_INTERLEUKIN_12	48	0.382602	3.13765	0	7.9358e-06	0.003
GO_RESPONSE_TO_TOXIC_SUBSTANCE	470	0.125506	3.13606	0	7.92176e-06	0.003
GO_INTERFERON_BETA_PRODUCTION	49	0.379945	3.13421	0	7.90776e-06	0.003
GO_MULTIVESICULAR_BODY_SORTING_PATHWAY	33	0.462056	3.13276	0	7.89381e-06	0.003
GO_FILOPODIUM_ASSEMBLY	56	0.352628	3.1305	0	7.87992e-06	0.003
GO_ANTIGEN_RECEPTOR_MEDIATED_SIGNALING_PATHWAY	210	0.184771	3.12785	0	1.043e-05	0.004
GO_POSITIVE_REGULATION_OF_MEMBRANE_PERMEABILITY	56	0.352061	3.12637	0	1.04117e-05	0.004
GO_MITOCHONDRIAL_OUTER_MEMBRANE_PERMEABILIZATION	48	0.384743	3.12266	0	1.03935e-05	0.004
GO_RESPONSE_TO_VIRUS	273	0.164457	3.11808	0	1.03753e-05	0.004
GO_VIRAL_GENOME_REPLICATION	106	0.252869	3.11769	0	1.03572e-05	0.004
GO_TRNA_MODIFICATION	76	0.301659	3.11388	0	1.03391e-05	0.004
GO_GENE_SILENCING	300	0.159642	3.11279	0	1.03212e-05	0.004
GO_CELL_CYCLE_CHECKPOINT	200	0.183697	3.10527	0	1.03032e-05	0.004
GO_CENTRAL_NERVOUS_SYSTEM_NEURON_DEVELOPMENT	76	0.311626	3.10086	0	1.02854e-05	0.004
GO_PROTEIN_QUALITY_CONTROL_FOR_MISFOLDED_OR_INCOMPLETELY_SYNTHESIZED_PROTEINS	27	0.509407	3.1	0	1.02676e-05	0.004
GO_CELLULAR_CARBOHYDRATE_METABOLIC_PROCESS	260	0.165874	3.09907	0	1.02498e-05	0.004
GO_VESICLE_MEDIATED_TRANSPORT_BETWEEN_ENDOSOMAL_COMPARTMENTS	39	0.41385	3.09652	0	1.02322e-05	0.004
GO_REGULATION_OF_STRESS_ACTIVATED_PROTEIN_KINASE_SIGNALING_CASCADE	216	0.180907	3.09194	0	1.02146e-05	0.004
GO_REGULATION_OF_NUCLEOCYTOPLASMIC_TRANSPORT	101	0.259591	3.09118	0	1.0197e-05	0.004
GO_INTRACILIARY_TRANSPORT_INVOLVED_IN_CILIUM_ASSEMBLY	40	0.416243	3.09118	0	1.01795e-05	0.004
GO_NEGATIVE_REGULATION_OF_CELLULAR_PROTEIN_LOCALIZATION	105	0.262781	3.08687	0	1.01621e-05	0.004
GO_POSITIVE_REGULATION_OF_DEFENSE_RESPONSE	449	0.127336	3.08635	0	1.01447e-05	0.004
GO_MITOCHONDRIAL_RNA_METABOLIC_PROCESS	41	0.414531	3.08624	0	1.01274e-05	0.004
GO_PURINE_NUCLEOSIDE_TRIPHOSPHATE_METABOLIC_PROCESS	58	0.337363	3.08582	0	1.01102e-05	0.004
GO_GLYCOSPHINGOLIPID_METABOLIC_PROCESS	63	0.334186	3.08505	0	1.0093e-05	0.004
GO_CERAMIDE_METABOLIC_PROCESS	85	0.288726	3.084	0	1.00758e-05	0.004
GO_MUSCLE_CELL_MIGRATION	86	0.283112	3.08346	0	1.00587e-05	0.004
GO_POSITIVE_REGULATION_OF_ESTABLISHMENT_OF_PROTEIN_LOCALIZATION_TO_MITOCHONDRION	53	0.360794	3.08192	0	1.00417e-05	0.004
GO_CELLULAR_AMINO_ACID_METABOLIC_PROCESS	303	0.153167	3.07925	0	1.00248e-05	0.004
GO_LIPOPROTEIN_BIOSYNTHETIC_PROCESS	90	0.275028	3.0762	0	1.00079e-05	0.004
GO_RESPONSE_TO_REACTIVE_OXYGEN_SPECIES	209	0.181073	3.07561	0	9.99102e-06	0.004
GO_PROTEIN_TRANSMEMBRANE_TRANSPORT	55	0.353376	3.07404	0	9.97422e-06	0.004
GO_SYNAPTIC_MEMBRANE_ADHESION	28	0.480484	3.07395	0	9.95749e-06	0.004
GO_REGULATION_OF_GENERATION_OF_PRECURSOR_METABOLITES_AND_ENERGY	143	0.222423	3.0669	0	9.94081e-06	0.004
GO_NUCLEOSIDE_MONOPHOSPHATE_METABOLIC_PROCESS	67	0.31381	3.06671	0	9.92418e-06	0.004
GO_RESPONSE_TO_CARBOHYDRATE	218	0.180575	3.06446	0	9.90762e-06	0.004
GO_MAINTENANCE_OF_LOCATION_IN_CELL	85	0.281081	3.06413	0	9.8911e-06	0.004
GO_REGULATION_OF_NEUROTRANSMITTER_SECRETION	103	0.263139	3.06361	0	9.87465e-06	0.004
GO_NUCLEOBASE_CONTAINING_SMALL_MOLECULE_BIOSYNTHETIC_PROCESS	93	0.265917	3.06343	0	9.85824e-06	0.004
GO_REGULATION_OF_REACTIVE_OXYGEN_SPECIES_BIOSYNTHETIC_PROCESS	83	0.287458	3.06321	0	9.84189e-06	0.004
GO_CHONDROITIN_SULFATE_PROTEOGLYCAN_METABOLIC_PROCESS	44	0.388857	3.06265	0	9.8256e-06	0.004
GO_POSITIVE_REGULATION_OF_PROTEIN_LOCALIZATION_TO_MEMBRANE	113	0.252016	3.05528	0	9.80936e-06	0.004
GO_DIVALENT_INORGANIC_CATION_TRANSPORT	458	0.126238	3.05512	0	9.79317e-06	0.004
GO_CELLULAR_RESPONSE_TO_INSULIN_STIMULUS	203	0.18252	3.05429	0	9.77704e-06	0.004
GO_REGULATION_OF_ACTOMYOSIN_STRUCTURE_ORGANIZATION	91	0.27495	3.05048	0	9.76096e-06	0.004
GO_REGULATION_OF_SPINDLE_ASSEMBLY	27	0.480739	3.04765	0	9.74493e-06	0.004
GO_CELL_SUBSTRATE_JUNCTION_ORGANIZATION	98	0.268296	3.04571	0	9.72895e-06	0.004
GO_REGULATION_OF_DNA_BIOSYNTHETIC_PROCESS	102	0.254428	3.04406	0	9.71303e-06	0.004
GO_TELOMERE_MAINTENANCE_VIA_TELOMERE_LENGTHENING	75	0.301924	3.03638	0	1.21206e-05	0.005
GO_POSITIVE_REGULATION_OF_DEVELOPMENTAL_GROWTH	173	0.197316	3.03596	0	1.21008e-05	0.005
GO_REGULATION_OF_SYNAPSE_ASSEMBLY	105	0.255289	3.03532	0	1.44809e-05	0.006
GO_POSITIVE_REGULATION_OF_PLASMA_MEMBRANE_BOUNDED_CELL_PROJECTION_ASSEMBLY	91	0.274217	3.03469	0	1.44573e-05	0.006
GO_RRNA_TRANSCRIPTION	27	0.476254	3.03328	0	1.44339e-05	0.006
GO_MEMBRANE_LIPID_BIOSYNTHETIC_PROCESS	139	0.226556	3.03152	0	1.44105e-05	0.006
GO_MYELIN_ASSEMBLY	19	0.573486	3.03131	0	1.43872e-05	0.006
GO_MITOCHONDRIAL_TRANSMEMBRANE_TRANSPORT	71	0.302899	3.03024	0	1.43639e-05	0.006
GO_LIPOPROTEIN_METABOLIC_PROCESS	121	0.231741	3.03018	0	1.43407e-05	0.006
GO_REGULATION_OF_METAL_ION_TRANSPORT	361	0.136612	3.0296	0	1.43177e-05	0.006
GO_REGULATION_OF_NERVOUS_SYSTEM_PROCESS	130	0.219825	3.0232	0	1.42946e-05	0.006
GO_POSITIVE_REGULATION_OF_ERAD_PATHWAY	15	0.643741	3.02048	0	1.42717e-05	0.006
GO_MITOTIC_CELL_CYCLE_CHECKPOINT	155	0.209634	3.0185	0	1.42488e-05	0.006
GO_RNA_CAPPING	32	0.43795	3.01744	0	1.4226e-05	0.006
GO_POSITIVE_REGULATION_OF_PROTEIN_SERINE_THREONINE_KINASE_ACTIVITY	315	0.147837	3.01732	0	1.42033e-05	0.006
GO_RESPONSE_TO_MISFOLDED_PROTEIN	24	0.517557	3.01389	0	1.41806e-05	0.006
GO_LONG_TERM_SYNAPTIC_POTENTIATION	83	0.283862	3.01329	0	1.41581e-05	0.006
GO_NEGATIVE_REGULATION_OF_BINDING	151	0.208976	3.01273	0	1.41355e-05	0.006
GO_REGULATION_OF_MICROTUBULE_POLYMERIZATION_OR_DEPOLYMERIZATION	78	0.289528	3.0072	0	1.65034e-05	0.007
GO_REGULATION_OF_LIPID_BIOSYNTHETIC_PROCESS	183	0.191975	3.00707	0	1.64772e-05	0.007
GO_LIPOSACCHARIDE_METABOLIC_PROCESS	106	0.247793	3.00575	0	1.64512e-05	0.007
GO_NEGATIVE_REGULATION_OF_RNA_SPLICING	26	0.490558	3.00396	0	1.8746e-05	0.008
GO_REGULATION_OF_REACTIVE_OXYGEN_SPECIES_METABOLIC_PROCESS	168	0.194783	3.00381	0	1.87164e-05	0.008
GO_PRESYNAPSE_ORGANIZATION	45	0.376446	2.99978	0	1.86869e-05	0.008
GO_REGULATION_OF_ACTIN_FILAMENT_BUNDLE_ASSEMBLY	93	0.267974	2.99888	0	1.86576e-05	0.008
GO_RECEPTOR_CLUSTERING	56	0.337607	2.99812	0	1.86283e-05	0.008
GO_CELLULAR_RESPONSE_TO_CARBOHYDRATE_STIMULUS	134	0.21778	2.99683	0	1.85991e-05	0.008
GO_RESPONSE_TO_METAL_ION	338	0.139068	2.9936	0	1.857e-05	0.008
GO_REACTIVE_OXYGEN_SPECIES_METABOLIC_PROCESS	238	0.170698	2.9927	0	1.85409e-05	0.008
GO_LYTIC_VACUOLE_ORGANIZATION	58	0.331009	2.98961	0	1.8512e-05	0.008
GO_AMYLOID_BETA_FORMATION	34	0.422524	2.98929	0	1.84832e-05	0.008
GO_RIBONUCLEOSIDE_MONOPHOSPHATE_BIOSYNTHETIC_PROCESS	30	0.461893	2.98884	0	1.84544e-05	0.008
GO_PROTEIN_TARGETING_TO_LYSOSOME	18	0.587971	2.98877	0	1.84258e-05	0.008
GO_TELOMERE_ORGANIZATION	139	0.21829	2.988	0	1.83972e-05	0.008
GO_NEGATIVE_REGULATION_OF_RESPONSE_TO_ENDOPLASMIC_RETICULUM_STRESS	41	0.39031	2.98763	0	1.83687e-05	0.008
GO_CELLULAR_RESPONSE_TO_AMINO_ACID_STIMULUS	62	0.320461	2.98529	0	1.83403e-05	0.008
GO_REGULATION_OF_PROTEIN_TYROSINE_KINASE_ACTIVITY	84	0.276482	2.97859	0	2.05802e-05	0.009
GO_COENZYME_BIOSYNTHETIC_PROCESS	139	0.221511	2.97111	0	2.27942e-05	0.01
GO_CILIARY_BASAL_BODY_PLASMA_MEMBRANE_DOCKING	93	0.267705	2.97015	0	2.27591e-05	0.01
GO_NEGATIVE_REGULATION_OF_MRNA_METABOLIC_PROCESS	76	0.287765	2.9685	0	2.27242e-05	0.01
GO_POSITIVE_REGULATION_OF_PROTEIN_BINDING	92	0.264371	2.96776	0	2.26893e-05	0.01
GO_MITOPHAGY	20	0.54554	2.96556	0	2.26546e-05	0.01
GO_THIOESTER_BIOSYNTHETIC_PROCESS	50	0.356003	2.96403	0	2.26199e-05	0.01
GO_REGULATION_OF_CELL_MATRIX_ADHESION	112	0.245911	2.96155	0	2.48486e-05	0.011
GO_MITOCHONDRION_LOCALIZATION	44	0.370049	2.96092	0	2.48107e-05	0.011
GO_MONOVALENT_INORGANIC_CATION_TRANSPORT	478	0.119162	2.95828	0	2.47729e-05	0.011
GO_REGULATION_OF_TELOMERE_MAINTENANCE_VIA_TELOMERE_LENGTHENING	57	0.331932	2.9567	0	2.47353e-05	0.011
GO_INTERACTION_WITH_HOST	186	0.185324	2.95654	0	2.46977e-05	0.011
GO_POSITIVE_REGULATION_OF_TELOMERE_MAINTENANCE	47	0.360959	2.95253	0	2.46603e-05	0.011
GO_CELLULAR_RESPONSE_TO_ABIOTIC_STIMULUS	297	0.148571	2.9517	0	2.4623e-05	0.011
GO_ERBB_SIGNALING_PATHWAY	134	0.218133	2.95145	0	2.45858e-05	0.011
GO_POSITIVE_REGULATION_OF_DNA_METABOLIC_PROCESS	174	0.188676	2.95043	0	2.45487e-05	0.011
GO_DEFENSE_RESPONSE_TO_VIRUS	194	0.183333	2.94894	0	2.45118e-05	0.011
GO_CELL_DEATH_IN_RESPONSE_TO_OXIDATIVE_STRESS	80	0.285004	2.94885	0	2.44749e-05	0.011
GO_PROTEIN_SUMOYLATION	70	0.299343	2.94878	0	2.44381e-05	0.011
GO_SPINDLE_ASSEMBLY	95	0.257052	2.94864	0	2.44015e-05	0.011
GO_PROTEIN_REFOLDING	30	0.457056	2.94849	0	2.4365e-05	0.011
GO_HOMEOSTASIS_OF_NUMBER_OF_CELLS	226	0.165466	2.94728	0	2.43286e-05	0.011
GO_POSITIVE_REGULATION_OF_MITOCHONDRIAL_OUTER_MEMBRANE_PERMEABILIZATION_INVOLVED_IN_APOPTOTIC_SIGNALING_PATHWAY	29	0.461381	2.9462	0	2.6533e-05	0.012
GO_CYTOKINETIC_PROCESS	38	0.407748	2.94542	0	2.64934e-05	0.012
GO_INTRA_GOLGI_VESICLE_MEDIATED_TRANSPORT	30	0.462142	2.94299	0	2.86555e-05	0.013
GO_REGULATION_OF_CHROMOSOME_SEGREGATION	97	0.258983	2.94262	0	2.86129e-05	0.013
GO_PROTEIN_LOCALIZATION_TO_CHROMOSOME	74	0.28864	2.94161	0	3.07253e-05	0.014
GO_SIGNAL_TRANSDUCTION_INVOLVED_IN_CELLULAR_RESPONSE_TO_AMMONIUM_ION	77	0.290481	2.94051	0	3.06798e-05	0.014
GO_NEGATIVE_REGULATION_OF_CYTOSKELETON_ORGANIZATION	134	0.223314	2.93981	0	3.06344e-05	0.014
GO_NUCLEOSIDE_TRIPHOSPHATE_BIOSYNTHETIC_PROCESS	52	0.34256	2.93709	0	3.05892e-05	0.014
GO_REGULATION_OF_NUCLEAR_DIVISION	178	0.191275	2.93683	0	3.05441e-05	0.014
GO_JNK_CASCADE	196	0.178805	2.93528	0	3.04991e-05	0.014
GO_NEGATIVE_REGULATION_OF_LOCOMOTION	328	0.142849	2.93331	0	3.04542e-05	0.014
GO_NEURON_PROJECTION_REGENERATION	57	0.320673	2.93303	0	3.04095e-05	0.014
GO_RESPONSE_TO_DOPAMINE	72	0.29523	2.93224	0	3.03649e-05	0.014
GO_PROTEIN_K11_LINKED_UBIQUITINATION	26	0.489646	2.93173	0	3.03204e-05	0.014
GO_REGULATION_OF_CLATHRIN_DEPENDENT_ENDOCYTOSIS	17	0.596439	2.93131	0	3.02761e-05	0.014
GO_MICROTUBULE_NUCLEATION	26	0.490971	2.93081	0	3.02319e-05	0.014
GO_ORGANELLE_FISSION	412	0.123939	2.92969	0	3.01879e-05	0.014
GO_TELOMERASE_RNA_LOCALIZATION	18	0.585805	2.92768	0	3.01439e-05	0.014
GO_RESPONSE_TO_LIGHT_STIMULUS	288	0.148435	2.9275	0	3.01001e-05	0.014
GO_CELLULAR_TRANSITION_METAL_ION_HOMEOSTASIS	89	0.262871	2.92711	0	3.21896e-05	0.015
GO_GOLGI_TO_PLASMA_MEMBRANE_PROTEIN_TRANSPORT	37	0.401514	2.92503	0	3.42604e-05	0.016
GO_REGULATION_OF_AMYLOID_PRECURSOR_PROTEIN_CATABOLIC_PROCESS	34	0.422524	2.92339	0	3.42109e-05	0.016
GO_RESPONSE_TO_UV	127	0.226078	2.9209	0	3.41614e-05	0.016
GO_REGULATION_OF_PROTEIN_TARGETING	77	0.286775	2.92027	0	3.41121e-05	0.016
GO_RETROGRADE_AXONAL_TRANSPORT	18	0.582179	2.91884	0	3.4063e-05	0.016
GO_PEPTIDYL_ASPARAGINE_MODIFICATION	34	0.418026	2.91866	0	3.4014e-05	0.016
GO_REGULATION_OF_PROTEIN_DEPOLYMERIZATION	77	0.285273	2.91733	0	3.39651e-05	0.016
GO_VIRAL_BUDDING_VIA_HOST_ESCRT_COMPLEX	20	0.54965	2.91604	0	3.39164e-05	0.016
GO_MATURATION_OF_5_8S_RRNA	25	0.482402	2.91517	0	3.38678e-05	0.016
GO_ENDOSOME_TRANSPORT_VIA_MULTIVESICULAR_BODY_SORTING_PATHWAY	25	0.484945	2.91493	0	3.38193e-05	0.016
GO_SYNAPTIC_TRANSMISSION_GLUTAMATERGIC	96	0.253267	2.9148	0	3.3771e-05	0.016
GO_NEGATIVE_REGULATION_OF_MRNA_PROCESSING	29	0.464064	2.91448	0	3.37228e-05	0.016
GO_ALCOHOL_METABOLIC_PROCESS	332	0.135453	2.901	0	3.57759e-05	0.017
GO_REGULATION_OF_MITOTIC_SPINDLE_ASSEMBLY	20	0.5399	2.89916	0	3.5725e-05	0.017
GO_REGULATION_OF_SYNAPTIC_VESICLE_RECYCLING	25	0.473233	2.89722	0.00193424	3.56742e-05	0.017
GO_RAB_PROTEIN_SIGNAL_TRANSDUCTION	64	0.308797	2.89549	0	3.76858e-05	0.018
GO_POSITIVE_REGULATION_OF_VIRAL_LIFE_CYCLE	56	0.32934	2.89518	0	3.76324e-05	0.018
GO_TRANSITION_METAL_ION_TRANSPORT	114	0.233283	2.88823	0	4.17548e-05	0.02
GO_HOMOPHILIC_CELL_ADHESION_VIA_PLASMA_MEMBRANE_ADHESION_MOLECULES	159	0.199661	2.88799	0	4.16958e-05	0.02
GO_NEGATIVE_REGULATION_OF_DENDRITE_DEVELOPMENT	27	0.46783	2.88518	0	4.1637e-05	0.02
GO_SPHINGOLIPID_BIOSYNTHETIC_PROCESS	100	0.243423	2.88045	0	4.15783e-05	0.02
GO_NEGATIVE_REGULATION_OF_MRNA_SPLICING_VIA_SPLICEOSOME	21	0.519779	2.88029	0	4.15199e-05	0.02
GO_CELLULAR_GLUCOSE_HOMEOSTASIS	140	0.206385	2.87929	0	4.14615e-05	0.02
GO_REGULATION_OF_MORPHOGENESIS_OF_AN_EPITHELIUM	180	0.185812	2.87893	0	4.14034e-05	0.02
GO_REGULATION_OF_REGULATED_SECRETORY_PATHWAY	149	0.208146	2.8786	0	4.13454e-05	0.02
GO_REGULATION_OF_NEURONAL_SYNAPTIC_PLASTICITY	50	0.34316	2.87821	0	4.12876e-05	0.02
GO_REGULATION_OF_OXIDATIVE_STRESS_INDUCED_CELL_DEATH	62	0.305394	2.8781	0	4.12299e-05	0.02
GO_REGULATION_OF_SISTER_CHROMATID_SEGREGATION	75	0.276517	2.87783	0	4.11724e-05	0.02
GO_PROTEIN_K48_LINKED_UBIQUITINATION	52	0.341502	2.87766	0	4.11151e-05	0.02
GO_VASCULAR_ENDOTHELIAL_GROWTH_FACTOR_RECEPTOR_SIGNALING_PATHWAY	92	0.256595	2.87645	0	4.10579e-05	0.02
GO_REGULATION_OF_VIRAL_LIFE_CYCLE	125	0.220513	2.87365	0	4.30181e-05	0.021
GO_TORC1_SIGNALING	35	0.399286	2.87361	0	4.29584e-05	0.021
GO_RECEPTOR_INTERNALIZATION	108	0.239233	2.87242	0	4.28989e-05	0.021
GO_ALCOHOL_BIOSYNTHETIC_PROCESS	162	0.194904	2.87093	0	4.28396e-05	0.021
GO_POSITIVE_REGULATION_OF_BINDING	172	0.187386	2.87027	0	4.27804e-05	0.021
GO_POSITIVE_REGULATION_OF_SYNAPSE_ASSEMBLY	66	0.298992	2.86908	0	4.27214e-05	0.021
GO_PROTEOGLYCAN_METABOLIC_PROCESS	88	0.264134	2.86766	0	4.26626e-05	0.021
GO_NEGATIVE_REGULATION_OF_PROTEIN_POLYMERIZATION	64	0.299555	2.86474	0	4.26039e-05	0.021
GO_PROTEOGLYCAN_BIOSYNTHETIC_PROCESS	63	0.301279	2.86391	0	4.45209e-05	0.022
GO_REGULATION_OF_NEURON_PROJECTION_REGENERATION	31	0.433011	2.86189	0	4.64831e-05	0.023
GO_AUTOPHAGOSOME_MATURATION	35	0.414824	2.86158	0	4.64194e-05	0.023
GO_NEGATIVE_REGULATION_OF_MAPK_CASCADE	165	0.190717	2.86136	0	4.63559e-05	0.023
GO_PROTEIN_K63_LINKED_UBIQUITINATION	47	0.354972	2.85901	0	4.83414e-05	0.024
GO_RECEPTOR_CATABOLIC_PROCESS	36	0.394419	2.85806	0	4.82755e-05	0.024
GO_POSITIVE_REGULATION_OF_CELL_CYCLE	357	0.132096	2.8562	0	4.82097e-05	0.024
GO_RESPONSE_TO_HYDROGEN_PEROXIDE	128	0.212761	2.85514	0	5.01835e-05	0.025
GO_INTRACELLULAR_PROTEIN_TRANSMEMBRANE_TRANSPORT	47	0.352473	2.85505	0	5.01154e-05	0.025
GO_REGULATION_OF_ATP_METABOLIC_PROCESS	109	0.234229	2.85379	0	5.00474e-05	0.025
GO_AMEBOIDAL_TYPE_CELL_MIGRATION	401	0.122958	2.85369	0	4.99795e-05	0.025
GO_ER_NUCLEUS_SIGNALING_PATHWAY	43	0.367112	2.85148	0	4.99119e-05	0.025
GO_DNA_BIOSYNTHETIC_PROCESS	178	0.183422	2.84899	0	5.18619e-05	0.026
GO_IRON_ION_HOMEOSTASIS	70	0.284669	2.84718	0	5.38462e-05	0.027
GO_REGULATION_OF_TRANSCRIPTION_BY_RNA_POLYMERASE_I	28	0.455377	2.84612	0	5.37736e-05	0.027
GO_AMINO_ACID_IMPORT	26	0.476722	2.84434	0	5.56638e-05	0.028
GO_REGULATION_OF_NMDA_RECEPTOR_ACTIVITY	35	0.409336	2.84328	0	5.5589e-05	0.028
GO_CERAMIDE_BIOSYNTHETIC_PROCESS	61	0.298531	2.84277	0	5.55143e-05	0.028
GO_REGULATION_OF_GLUTAMATE_RECEPTOR_SIGNALING_PATHWAY	63	0.299087	2.83978	0	5.73849e-05	0.029
GO_RNA_METHYLATION	70	0.289131	2.83883	0	5.73081e-05	0.029
GO_NUCLEAR_TRANSCRIBED_MRNA_CATABOLIC_PROCESS_EXONUCLEOLYTIC	34	0.400276	2.83877	0	5.72315e-05	0.029
GO_FATTY_ACYL_COA_METABOLIC_PROCESS	36	0.389175	2.83708	0	5.71551e-05	0.029
GO_AXON_ENSHEATHMENT_IN_CENTRAL_NERVOUS_SYSTEM	21	0.519869	2.83491	0.00200401	5.70789e-05	0.029
GO_PATTERN_RECOGNITION_RECEPTOR_SIGNALING_PATHWAY	183	0.178384	2.83019	0	6.0899e-05	0.031
GO_REGULATION_OF_RESPONSE_TO_CYTOKINE_STIMULUS	163	0.191617	2.82989	0	6.0818e-05	0.031
GO_NUCLEOSIDE_METABOLIC_PROCESS	87	0.260702	2.82742	0	6.07372e-05	0.031
GO_IN_UTERO_EMBRYONIC_DEVELOPMENT	362	0.12972	2.82476	0	6.06567e-05	0.031
GO_POSITIVE_REGULATION_OF_ION_TRANSPORT	259	0.148906	2.82357	0	6.05763e-05	0.031
GO_POSITIVE_REGULATION_OF_PROTEIN_LOCALIZATION_TO_NUCLEUS	72	0.27959	2.82302	0	6.04962e-05	0.031
GO_RESPONSE_TO_AXON_INJURY	76	0.276938	2.82111	0	6.04163e-05	0.031
GO_REGULATION_OF_CHOLESTEROL_BIOSYNTHETIC_PROCESS	42	0.369688	2.82088	0	6.03366e-05	0.031
GO_LATE_ENDOSOME_TO_VACUOLE_TRANSPORT	17	0.575353	2.81842	0	6.60577e-05	0.033
GO_POSITIVE_REGULATION_OF_MRNA_CATABOLIC_PROCESS	47	0.350636	2.81785	0	6.79331e-05	0.034
GO_REGULATION_OF_INTRINSIC_APOPTOTIC_SIGNALING_PATHWAY	153	0.199614	2.81756	0	6.97762e-05	0.035
GO_NEGATIVE_REGULATION_OF_PROTEOLYSIS_INVOLVED_IN_CELLULAR_PROTEIN_CATABOLIC_PROCESS	65	0.291768	2.8173	0	6.96846e-05	0.035
GO_NEGATIVE_REGULATION_OF_SMALL_GTPASE_MEDIATED_SIGNAL_TRANSDUCTION	55	0.313085	2.81726	0	6.95933e-05	0.035
GO_NEGATIVE_REGULATION_OF_CELLULAR_PROTEIN_CATABOLIC_PROCESS	79	0.276708	2.81221	0	7.14193e-05	0.036
GO_TRANSCRIPTION_ELONGATION_FROM_RNA_POLYMERASE_I_PROMOTER	30	0.417062	2.80378	0	7.32955e-05	0.037
GO_POSITIVE_REGULATION_OF_EXTRINSIC_APOPTOTIC_SIGNALING_PATHWAY	48	0.340178	2.80331	0	7.51071e-05	0.038
GO_NCRNA_EXPORT_FROM_NUCLEUS	35	0.392558	2.80282	0	7.50092e-05	0.038
GO_TRANSCRIPTION_PREINITIATION_COMPLEX_ASSEMBLY	41	0.374551	2.80217	0	7.49115e-05	0.038
GO_REGULATION_OF_CELL_JUNCTION_ASSEMBLY	92	0.25419	2.80165	0	7.48141e-05	0.038
GO_AMINE_METABOLIC_PROCESS	132	0.207022	2.80081	0	7.4717e-05	0.038
GO_CELL_SUBSTRATE_ADHESION	331	0.132269	2.80041	0	7.65583e-05	0.038
GO_POSTSYNAPTIC_MEMBRANE_ORGANIZATION	37	0.378476	2.80038	0	7.64592e-05	0.038
GO_REGULATION_OF_SPINDLE_ORGANIZATION	41	0.377857	2.79993	0	7.63602e-05	0.038
GO_REGULATION_OF_MITOCHONDRIAL_MEMBRANE_PERMEABILITY_INVOLVED_IN_APOPTOTIC_PROCESS	55	0.312336	2.7997	0	7.62616e-05	0.038
GO_REGULATION_OF_CARBOHYDRATE_METABOLIC_PROCESS	188	0.180775	2.79814	0	7.80905e-05	0.039
GO_POSITIVE_REGULATION_OF_DNA_BIOSYNTHETIC_PROCESS	65	0.289066	2.78762	0	8.37508e-05	0.042
GO_NEGATIVE_REGULATION_OF_PROTEASOMAL_PROTEIN_CATABOLIC_PROCESS	49	0.332074	2.78415	0	8.36431e-05	0.042
GO_REGULATION_OF_MICROTUBULE_POLYMERIZATION	49	0.341708	2.78243	0	9.11412e-05	0.046
GO_TRANSITION_METAL_ION_HOMEOSTASIS	110	0.226919	2.78183	0	9.10242e-05	0.046
GO_MODIFICATION_OF_POSTSYNAPTIC_STRUCTURE	17	0.565392	2.78124	0	9.09075e-05	0.046
GO_MITOCHONDRIAL_FUSION	22	0.497591	2.77706	0	9.64686e-05	0.049
GO_RIBONUCLEOSIDE_TRIPHOSPHATE_BIOSYNTHETIC_PROCESS	41	0.36537	2.77668	0	9.63453e-05	0.049
GO_RHYTHMIC_PROCESS	287	0.136951	2.77566	0	9.62222e-05	0.049
GO_TRANSCRIPTION_INITIATION_FROM_RNA_POLYMERASE_II_PROMOTER	182	0.179857	2.76779	0	9.98709e-05	0.051
GO_CLATHRIN_COAT_ASSEMBLY	18	0.547649	2.76727	0	9.97436e-05	0.051
GO_MIDBODY_ABSCISSION	16	0.56206	2.76556	0	0.000101466	0.052
GO_NEGATIVE_REGULATION_OF_RESPONSE_TO_OXIDATIVE_STRESS	47	0.337085	2.7652	0	0.000101337	0.052
GO_MYELIN_MAINTENANCE	15	0.580784	2.76464	0	0.000101209	0.052
GO_MAINTENANCE_OF_PROTEIN_LOCATION	99	0.239009	2.75712	0	0.000102933	0.053
GO_INSULIN_SECRETION_INVOLVED_IN_CELLULAR_RESPONSE_TO_GLUCOSE_STIMULUS	58	0.30999	2.74772	0	0.000104677	0.054
GO_L_ALPHA_AMINO_ACID_TRANSMEMBRANE_TRANSPORT	50	0.329693	2.74631	0	0.000106459	0.055
GO_REGULATION_OF_MITOPHAGY	15	0.592599	2.7431	0	0.000106324	0.055
GO_MATURATION_OF_5_8S_RRNA_FROM_TRICISTRONIC_RRNA_TRANSCRIPT_SSU_RRNA_5_8S_RRNA_LSU_RRNA	21	0.5071	2.74263	0	0.00010619	0.055
GO_NUCLEOSIDE_BISPHOSPHATE_METABOLIC_PROCESS	128	0.209501	2.73918	0	0.000107849	0.056
GO_VESICLE_CARGO_LOADING	18	0.531724	2.73557	0	0.000111403	0.058
GO_POSITIVE_REGULATION_OF_RNA_SPLICING	33	0.399836	2.73401	0	0.000111263	0.058
GO_CELL_REDOX_HOMEOSTASIS	71	0.279903	2.73383	0	0.000111124	0.058
GO_VISUAL_BEHAVIOR	51	0.319863	2.73183	0	0.000112815	0.059
GO_NEUROTROPHIN_SIGNALING_PATHWAY	37	0.382627	2.73074	0	0.000114516	0.059
GO_PROTEIN_DESTABILIZATION	41	0.362	2.72892	0	0.000114373	0.059
GO_NUCLEOSIDE_DIPHOSPHATE_METABOLIC_PROCESS	141	0.195151	2.72885	0	0.00011423	0.059
GO_HISTONE_MRNA_METABOLIC_PROCESS	21	0.50394	2.72162	0	0.000119605	0.062
GO_SCHWANN_CELL_DIFFERENTIATION	37	0.37436	2.72106	0	0.000119456	0.062
GO_NEGATIVE_REGULATION_OF_PROTEIN_BINDING	95	0.238319	2.72078	0	0.000119307	0.062
GO_CENTRAL_NERVOUS_SYSTEM_NEURON_AXONOGENESIS	33	0.401146	2.72023	0	0.000119159	0.062
GO_HORMONE_MEDIATED_SIGNALING_PATHWAY	214	0.16301	2.7182	0	0.000119011	0.062
GO_REGULATION_OF_MEMBRANE_PERMEABILITY	74	0.264834	2.71705	0	0.000118864	0.062
GO_CELLULAR_IRON_ION_HOMEOSTASIS	53	0.312951	2.71337	0	0.000120587	0.063
GO_PROTEIN_LOCALIZATION_TO_CHROMOSOME_TELOMERIC_REGION	26	0.442748	2.71192	0	0.000120438	0.063
GO_PROTON_TRANSMEMBRANE_TRANSPORT	124	0.206613	2.71062	0	0.00012029	0.063
GO_REGULATION_OF_CHROMATIN_ORGANIZATION	164	0.184394	2.71019	0	0.000120141	0.063
GO_PROTEIN_DEGLYCOSYLATION	26	0.450217	2.70999	0	0.000119993	0.063
GO_TRANSCRIPTION_INITIATION_FROM_RNA_POLYMERASE_I_PROMOTER	34	0.391963	2.70793	0	0.000119846	0.063
GO_REGULATION_OF_MYELINATION	41	0.355195	2.70773	0	0.000119698	0.063
GO_REGULATION_OF_AMYLOID_BETA_FORMATION	28	0.426617	2.70367	0	0.000124995	0.066
GO_REGULATION_OF_CELL_CYCLE_G1_S_PHASE_TRANSITION	166	0.179286	2.70362	0	0.000124842	0.066
GO_ESTABLISHMENT_OF_MITOCHONDRION_LOCALIZATION	24	0.475891	2.70232	0	0.000126515	0.067
GO_NEURAL_NUCLEUS_DEVELOPMENT	54	0.319891	2.70141	0	0.00012816	0.067
GO_CYTOPLASMIC_MICROTUBULE_ORGANIZATION	52	0.319195	2.6999	0	0.000129826	0.068
GO_L_AMINO_ACID_TRANSPORT	63	0.287116	2.69871	0	0.000131543	0.069
GO_NEGATIVE_REGULATION_OF_RESPONSE_TO_EXTERNAL_STIMULUS	348	0.127095	2.69857	0	0.000131383	0.069
GO_POSITIVE_REGULATION_OF_MAP_KINASE_ACTIVITY	244	0.148112	2.69854	0	0.000131223	0.069
GO_INSULIN_SECRETION	197	0.167351	2.69763	0	0.000132845	0.07
GO_MOVEMENT_IN_ENVIRONMENT_OF_OTHER_ORGANISM_INVOLVED_IN_SYMBIOTIC_INTERACTION	31	0.401247	2.69693	0	0.000132684	0.07
GO_REGULATION_OF_ALCOHOL_BIOSYNTHETIC_PROCESS	72	0.275817	2.69544	0	0.000132523	0.07
GO_RETROGRADE_TRANSPORT_ENDOSOME_TO_PLASMA_MEMBRANE	24	0.464321	2.69521	0	0.000132363	0.07
GO_MRNA_SPLICE_SITE_SELECTION	30	0.412618	2.69491	0	0.000133963	0.071
GO_MAINTENANCE_OF_PROTEIN_LOCATION_IN_CELL	68	0.276528	2.69449	0	0.000133802	0.071
GO_RIBONUCLEOTIDE_CATABOLIC_PROCESS	29	0.422123	2.69438	0	0.00013364	0.071
GO_REGULATION_OF_RHO_PROTEIN_SIGNAL_TRANSDUCTION	133	0.201283	2.69412	0	0.000133479	0.071
GO_RNA_POLYADENYLATION	41	0.354851	2.69296	0	0.000133319	0.071
GO_TERMINATION_OF_RNA_POLYMERASE_I_TRANSCRIPTION	30	0.417062	2.68948	0	0.000134962	0.072
GO_CHROMATIN_REMODELING	146	0.192988	2.68893	0	0.0001348	0.072
GO_DNA_PACKAGING	124	0.203127	2.68837	0	0.000136397	0.073
GO_PROTEASOMAL_UBIQUITIN_INDEPENDENT_PROTEIN_CATABOLIC_PROCESS	22	0.478409	2.68732	0	0.000138022	0.074
GO_STEROL_BIOSYNTHETIC_PROCESS	72	0.26867	2.6856	0	0.000137856	0.074
GO_DRUG_METABOLIC_PROCESS	493	0.101761	2.68143	0	0.000144824	0.077
GO_MACROMOLECULE_METHYLATION	271	0.141527	2.67874	0	0.000144651	0.077
GO_CORTICAL_CYTOSKELETON_ORGANIZATION	47	0.330938	2.67793	0	0.000146284	0.078
GO_POSITIVE_REGULATION_OF_TRANSMEMBRANE_TRANSPORT	183	0.171413	2.67609	0	0.00014611	0.078
GO_PROTEIN_EXIT_FROM_ENDOPLASMIC_RETICULUM	41	0.351821	2.67575	0	0.000147645	0.079
GO_MITOTIC_CYTOKINETIC_PROCESS	22	0.4769	2.67133	0	0.000156251	0.084
GO_NEGATIVE_REGULATION_OF_PROTEIN_CONTAINING_COMPLEX_DISASSEMBLY	69	0.276295	2.66857	0	0.000157786	0.085
GO_CHONDROITIN_SULFATE_PROTEOGLYCAN_BIOSYNTHETIC_PROCESS	31	0.406983	2.6685	0	0.000157599	0.085
GO_POSITIVE_REGULATION_OF_RESPONSE_TO_ENDOPLASMIC_RETICULUM_STRESS	38	0.354439	2.66726	0	0.000159138	0.086
GO_RESPONSE_TO_STEROID_HORMONE	367	0.124311	2.66678	0	0.00015895	0.086
GO_PLATELET_DERIVED_GROWTH_FACTOR_RECEPTOR_SIGNALING_PATHWAY	57	0.294719	2.66653	0	0.000158762	0.086
GO_REGULATION_OF_PROTEIN_LOCALIZATION_TO_PLASMA_MEMBRANE	91	0.240244	2.66556	0	0.000160301	0.087
GO_CHROMOSOME_LOCALIZATION	73	0.259364	2.6643	0	0.000160112	0.087
GO_POSITIVE_REGULATION_OF_MRNA_PROCESSING	30	0.421022	2.66318	0	0.000159924	0.087
GO_CYTOPLASMIC_PATTERN_RECOGNITION_RECEPTOR_SIGNALING_PATHWAY	57	0.296166	2.66219	0	0.000159736	0.087
GO_GLYCOSYL_COMPOUND_BIOSYNTHETIC_PROCESS	35	0.377652	2.66117	0	0.000159548	0.087
GO_PROTEIN_HOMOOLIGOMERIZATION	296	0.130882	2.66084	0	0.000159361	0.087
GO_PROTEIN_LOCALIZATION_TO_MICROTUBULE_ORGANIZING_CENTER	31	0.410631	2.65987	0.0019685	0.000160957	0.087
GO_POSITIVE_REGULATION_OF_PROTEIN_DEPHOSPHORYLATION	42	0.353919	2.65965	0	0.000160769	0.087
GO_MANNOSYLATION	32	0.39143	2.65777	0	0.000164043	0.089
GO_NEGATIVE_REGULATION_OF_CHROMOSOME_ORGANIZATION	120	0.204552	2.65322	0.00189753	0.000174093	0.095
GO_GLUCOSE_METABOLIC_PROCESS	194	0.167104	2.65229	0	0.00017731	0.097
GO_NUCLEAR_ENVELOPE_REASSEMBLY	18	0.518551	2.6509	0	0.000178797	0.098
GO_PHOSPHATIDYLINOSITOL_PHOSPHORYLATION	48	0.32298	2.6504	0	0.000180266	0.099
GO_RESPONSE_TO_ACID_CHEMICAL	320	0.127964	2.64971	0	0.000180057	0.099
GO_STEM_CELL_DIFFERENTIATION	241	0.148798	2.64843	0	0.000181589	0.099
GO_RUFFLE_ASSEMBLY	39	0.354755	2.64791	0	0.000181379	0.099
GO_POSITIVE_REGULATION_OF_PEPTIDASE_ACTIVITY	171	0.176438	2.64499	0	0.000188084	0.103
GO_REGULATION_OF_NUCLEOBASE_CONTAINING_COMPOUND_TRANSPORT	15	0.563318	2.64365	0	0.000187867	0.103
GO_METHYLATION	319	0.129115	2.64314	0	0.00018765	0.103
GO_REGULATION_OF_PROTEIN_LOCALIZATION_TO_CELL_PERIPHERY	112	0.214393	2.6406	0	0.000187433	0.103
GO_CELLULAR_RESPONSE_TO_GLUCOSE_STARVATION	35	0.367056	2.63979	0	0.000188921	0.104
GO_PYRIMIDINE_RIBONUCLEOTIDE_METABOLIC_PROCESS	19	0.502889	2.63955	0	0.000188704	0.104
GO_POSITIVE_REGULATION_OF_ACTIN_FILAMENT_BUNDLE_ASSEMBLY	59	0.297896	2.63876	0	0.00019018	0.105
GO_REGULATION_OF_PROTEIN_LOCALIZATION_TO_SYNAPSE	26	0.43585	2.63608	0	0.000193404	0.107
GO_REGENERATION	182	0.170389	2.63433	0	0.000196603	0.109
GO_INTRACILIARY_TRANSPORT	51	0.32015	2.63174	0	0.000199766	0.111
GO_RESPONSE_TO_TRANSFORMING_GROWTH_FACTOR_BETA	233	0.150587	2.63133	0	0.000199537	0.111
GO_REGULATION_OF_RESPONSE_TO_OXIDATIVE_STRESS	81	0.252443	2.63103	0	0.000199309	0.111
GO_MICROTUBULE_ORGANIZING_CENTER_ORGANIZATION	124	0.203203	2.63054	0	0.000200726	0.112
GO_PEPTIDE_HORMONE_SECRETION	239	0.146306	2.6293	0	0.000202176	0.112
GO_NEGATIVE_REGULATION_OF_CELL_GROWTH	175	0.170026	2.62823	0	0.000207057	0.115
GO_NCRNA_3_END_PROCESSING	33	0.391082	2.62795	0	0.000208518	0.116
GO_MYELOID_CELL_DIFFERENTIATION	364	0.121349	2.62693	0	0.000210001	0.117
GO_PROTEIN_LOCALIZATION_TO_POSTSYNAPTIC_MEMBRANE	44	0.343743	2.62671	0	0.000211436	0.118
GO_REGULATION_OF_OXIDATIVE_STRESS_INDUCED_INTRINSIC_APOPTOTIC_SIGNALING_PATHWAY	25	0.435581	2.62541	0	0.000212901	0.119
GO_SNRNA_TRANSCRIPTION	68	0.270268	2.62533	0	0.000214315	0.12
GO_INOSITOL_PHOSPHATE_METABOLIC_PROCESS	70	0.260967	2.6248	0	0.00021745	0.121
GO_RESPONSE_TO_GAMMA_RADIATION	52	0.311649	2.62443	0	0.000217205	0.121
GO_MITOCHONDRIAL_DEPOLARIZATION	22	0.464756	2.62021	0	0.000221983	0.124
GO_REGULATION_OF_CYSTEINE_TYPE_ENDOPEPTIDASE_ACTIVITY	213	0.15888	2.61674	0	0.000236918	0.133
GO_REGULATION_OF_LONG_TERM_NEURONAL_SYNAPTIC_PLASTICITY	25	0.440919	2.61603	0	0.000238335	0.134
GO_NUCLEOTIDE_EXCISION_REPAIR_DNA_INCISION	40	0.342371	2.61435	0	0.000241415	0.136
GO_POSITIVE_REGULATION_OF_SMOOTH_MUSCLE_CELL_MIGRATION	39	0.345233	2.61421	0	0.000241144	0.136
GO_RAC_PROTEIN_SIGNAL_TRANSDUCTION	33	0.383769	2.61088	0	0.000245817	0.138
GO_INTRINSIC_APOPTOTIC_SIGNALING_PATHWAY_IN_RESPONSE_TO_OXIDATIVE_STRESS	40	0.355731	2.61082	0	0.000245542	0.138
GO_NEGATIVE_REGULATION_OF_PROTEASOMAL_UBIQUITIN_DEPENDENT_PROTEIN_CATABOLIC_PROCESS	32	0.397736	2.60886	0	0.000250256	0.141
GO_NEGATIVE_REGULATION_OF_GTPASE_ACTIVITY	45	0.321677	2.60843	0	0.000249976	0.141
GO_ENDOCYTIC_RECYCLING	42	0.336393	2.6042	0	0.000263009	0.149
GO_CARBOHYDRATE_BIOSYNTHETIC_PROCESS	194	0.160173	2.60393	0	0.000262715	0.149
GO_REGULATION_OF_PROTEIN_AUTOPHOSPHORYLATION	45	0.323427	2.60317	0	0.000265695	0.15
GO_TISSUE_MIGRATION	305	0.129896	2.60278	0	0.00026873	0.152
GO_PROTEIN_AUTOUBIQUITINATION	63	0.277074	2.60136	0	0.0002701	0.153
GO_REGULATION_OF_UBIQUITIN_PROTEIN_TRANSFERASE_ACTIVITY	49	0.313092	2.60064	0	0.000271431	0.154
GO_INSULIN_RECEPTOR_SIGNALING_PATHWAY	131	0.196654	2.60012	0	0.000272783	0.155
GO_CARBOHYDRATE_CATABOLIC_PROCESS	182	0.170217	2.59599	0	0.000279143	0.159
GO_POSITIVE_REGULATION_OF_FILOPODIUM_ASSEMBLY	27	0.418661	2.59536	0	0.000278834	0.159
GO_PURINE_NUCLEOSIDE_MONOPHOSPHATE_METABOLIC_PROCESS	34	0.376213	2.59353	0	0.000283407	0.162
GO_MRNA_CIS_SPLICING_VIA_SPLICEOSOME	29	0.397944	2.59231	0	0.000287923	0.165
GO_PYRIMIDINE_NUCLEOTIDE_BIOSYNTHETIC_PROCESS	39	0.342359	2.59163	0	0.000294173	0.169
GO_AMYLOID_BETA_METABOLIC_PROCESS	45	0.325151	2.59033	0	0.000295481	0.17
GO_COLLATERAL_SPROUTING	26	0.419567	2.5895	0	0.000296799	0.171
GO_POSITIVE_REGULATION_OF_DENDRITIC_SPINE_DEVELOPMENT	42	0.338994	2.58607	0	0.000298097	0.172
GO_REGULATION_OF_PEPTIDYL_SERINE_PHOSPHORYLATION	124	0.198612	2.58278	0	0.000302613	0.174
GO_PROTEIN_LOCALIZATION_TO_GOLGI_APPARATUS	25	0.430152	2.58256	0	0.000302281	0.174
GO_POSITIVE_REGULATION_OF_DEPHOSPHORYLATION	56	0.301238	2.58219	0	0.000306818	0.176
GO_CYTOCHROME_COMPLEX_ASSEMBLY	31	0.388322	2.58101	0	0.000309704	0.178
GO_POSITIVE_REGULATION_OF_TOR_SIGNALING	35	0.37067	2.5804	0	0.000309365	0.178
GO_LAMELLIPODIUM_ORGANIZATION	77	0.253438	2.58006	0	0.000309027	0.178
GO_ANOIKIS	31	0.389764	2.58	0	0.00030869	0.178
GO_NECROTIC_CELL_DEATH	45	0.321981	2.57982	0	0.000308353	0.178
GO_CELLULAR_LIPID_CATABOLIC_PROCESS	201	0.155704	2.57964	0	0.000308017	0.178
GO_POSITIVE_REGULATION_OF_NUCLEOCYTOPLASMIC_TRANSPORT	62	0.27723	2.57959	0	0.000307682	0.178
GO_TOLL_LIKE_RECEPTOR_SIGNALING_PATHWAY	138	0.187642	2.57916	0	0.000307348	0.178
GO_NEGATIVE_REGULATION_OF_ACTIN_FILAMENT_POLYMERIZATION	50	0.31252	2.57891	0	0.000308656	0.179
GO_SYNAPTIC_VESICLE_CYTOSKELETAL_TRANSPORT	19	0.499233	2.57742	0	0.000309919	0.18
GO_SYNAPTIC_VESICLE_PRIMING	19	0.501625	2.57657	0	0.000309583	0.18
GO_ENDOTHELIAL_CELL_MIGRATION	220	0.152457	2.57644	0	0.000309248	0.18
GO_DOPAMINE_RECEPTOR_SIGNALING_PATHWAY	40	0.349645	2.57573	0	0.000310519	0.181
GO_NUCLEOSOME_ORGANIZATION	98	0.224837	2.5694	0	0.000322989	0.186
GO_PHOSPHOLIPID_DEPHOSPHORYLATION	34	0.373839	2.56905	0.00198413	0.000324254	0.187
GO_POSITIVE_REGULATION_OF_NEURON_APOPTOTIC_PROCESS	55	0.2952	2.56764	0	0.000330253	0.19
GO_REGULATION_OF_PROTEIN_EXPORT_FROM_NUCLEUS	35	0.362673	2.56717	0	0.000329898	0.19
GO_REGULATION_OF_VASCULATURE_DEVELOPMENT	341	0.121089	2.56696	0	0.000329543	0.19
GO_FEAR_RESPONSE	40	0.340611	2.56695	0	0.000329189	0.19
GO_ENDOPLASMIC_RETICULUM_ORGANIZATION	49	0.309994	2.56537	0	0.000333609	0.193
GO_CHONDROITIN_SULFATE_BIOSYNTHETIC_PROCESS	26	0.421797	2.56458	0	0.000333252	0.193
GO_MYELOID_CELL_HOMEOSTASIS	136	0.18993	2.56121	0	0.00033922	0.197
GO_POSTSYNAPTIC_CYTOSKELETON_ORGANIZATION	16	0.518516	2.55987	0	0.000345222	0.201
GO_ADULT_BEHAVIOR	131	0.188767	2.5577	0	0.000352752	0.204
GO_ENDOPLASMIC_RETICULUM_TO_CYTOSOL_TRANSPORT	25	0.430681	2.5572	0	0.000355553	0.206
GO_RELEASE_OF_CYTOCHROME_C_FROM_MITOCHONDRIA	55	0.298779	2.55653	0	0.000355174	0.206
GO_POSTSYNAPTIC_SPECIALIZATION_ORGANIZATION	33	0.362097	2.55651	0	0.000354795	0.206
GO_FATTY_ACYL_COA_BIOSYNTHETIC_PROCESS	28	0.401182	2.55645	0	0.000354418	0.206
GO_NEGATIVE_REGULATION_OF_DNA_METABOLIC_PROCESS	94	0.22019	2.55584	0	0.00035561	0.207
GO_CELLULAR_RESPONSE_TO_IONIZING_RADIATION	62	0.270785	2.55547	0	0.000356811	0.207
GO_AMINO_ACID_TRANSMEMBRANE_TRANSPORT	78	0.245038	2.5549	0	0.000357967	0.208
GO_CHROMATIN_ASSEMBLY_OR_DISASSEMBLY	105	0.208814	2.55434	0	0.000359157	0.208
GO_REGULATION_OF_EARLY_ENDOSOME_TO_LATE_ENDOSOME_TRANSPORT	17	0.517202	2.55296	0.00202429	0.000361893	0.21
GO_POSITIVE_REGULATION_OF_TRANSCRIPTION_BY_RNA_POLYMERASE_I	21	0.468052	2.55253	0	0.000366237	0.213
GO_NEGATIVE_REGULATION_OF_UBIQUITIN_DEPENDENT_PROTEIN_CATABOLIC_PROCESS	46	0.317658	2.55122	0	0.000368956	0.214
GO_NEGATIVE_REGULATION_OF_INTRINSIC_APOPTOTIC_SIGNALING_PATHWAY	91	0.229415	2.54738	0	0.000374785	0.217
GO_POSITIVE_REGULATION_OF_UBIQUITIN_PROTEIN_TRANSFERASE_ACTIVITY	30	0.398654	2.54433	0	0.000391526	0.228
GO_MULTICELLULAR_ORGANISM_GROWTH	143	0.181865	2.53972	0	0.000403413	0.232
GO_REGULATION_OF_CYTOPLASMIC_TRANSPORT	22	0.45765	2.53333	0	0.000427991	0.243
GO_EXTRACELLULAR_VESICLE_BIOGENESIS	20	0.469453	2.53298	0	0.000429092	0.244
GO_EPIDERMAL_GROWTH_FACTOR_RECEPTOR_SIGNALING_PATHWAY	112	0.201248	2.53199	0	0.000431808	0.245
GO_PEPTIDYL_TYROSINE_MODIFICATION	350	0.11795	2.53095	0	0.000431356	0.245
GO_POSITIVE_REGULATION_OF_ORGANELLE_ASSEMBLY	68	0.260741	2.5303	0	0.00043246	0.246
GO_CELL_CELL_ADHESION_VIA_PLASMA_MEMBRANE_ADHESION_MOLECULES	261	0.132271	2.52575	0	0.000451953	0.257
GO_NEGATIVE_REGULATION_OF_PROTEIN_MATURATION	25	0.422525	2.52506	0	0.000454549	0.258
GO_POSITIVE_REGULATION_OF_TELOMERE_MAINTENANCE_VIA_TELOMERE_LENGTHENING	35	0.366243	2.52329	0	0.000455625	0.259
GO_GLUTAMATE_SECRETION	44	0.320528	2.52082	0	0.000462899	0.263
GO_MITOTIC_DNA_INTEGRITY_CHECKPOINT	99	0.210875	2.51999	0	0.000463947	0.264
GO_POSITIVE_REGULATION_OF_STRESS_FIBER_ASSEMBLY	50	0.310346	2.51956	0	0.000464978	0.265
GO_REGULATION_OF_POSTTRANSCRIPTIONAL_GENE_SILENCING	83	0.237578	2.51847	0	0.000470725	0.269
GO_RESPONSE_TO_ANESTHETIC	68	0.260168	2.51833	0	0.000471785	0.269
GO_NEGATIVE_REGULATION_OF_TOR_SIGNALING	38	0.339395	2.51832	0	0.000471296	0.269
GO_REGULATION_OF_CHROMOSOME_SEPARATION	59	0.279036	2.51678	0	0.00047238	0.27
GO_THIOESTER_METABOLIC_PROCESS	98	0.219846	2.51356	0	0.000479563	0.274
GO_POSITIVE_REGULATION_OF_EXOCYTOSIS	81	0.238647	2.51257	0	0.000482201	0.275
GO_POSITIVE_REGULATION_OF_INTERFERON_ALPHA_PRODUCTION	22	0.442075	2.51194	0	0.000483202	0.276
GO_POSITIVE_REGULATION_OF_INSULIN_SECRETION	70	0.255976	2.51083	0	0.000488834	0.278
GO_REGULATION_OF_ACTIN_NUCLEATION	25	0.413159	2.50943	0	0.000497461	0.282
GO_LIMBIC_SYSTEM_DEVELOPMENT	108	0.209459	2.50929	0	0.000496949	0.282
GO_REGULATION_OF_SIGNALING_RECEPTOR_ACTIVITY	153	0.175496	2.50734	0	0.000507149	0.287
GO_CHAPERONE_MEDIATED_PROTEIN_COMPLEX_ASSEMBLY	19	0.484833	2.50373	0	0.000515664	0.291
GO_SMALL_MOLECULE_CATABOLIC_PROCESS	404	0.107462	2.50309	0	0.000516653	0.292
GO_PROTEIN_INSERTION_INTO_MITOCHONDRIAL_MEMBRANE	40	0.330339	2.50229	0	0.000519156	0.294
GO_REGULATION_OF_NEUROTRANSMITTER_RECEPTOR_ACTIVITY	73	0.254538	2.50203	0	0.000523113	0.295
GO_NEGATIVE_REGULATION_OF_EXOCYTOSIS	29	0.390233	2.5017	0	0.000522577	0.295
GO_REGULATION_OF_ANIMAL_ORGAN_MORPHOGENESIS	249	0.137078	2.50138	0.00199203	0.000522043	0.295
GO_PROGRAMMED_NECROTIC_CELL_DEATH	39	0.337306	2.50039	0	0.000524491	0.295
GO_INTERFERON_ALPHA_PRODUCTION	28	0.399934	2.49996	0	0.000523955	0.295
GO_FOREBRAIN_CELL_MIGRATION	58	0.279968	2.49755	0	0.00053101	0.299
GO_REGULATION_OF_OXIDOREDUCTASE_ACTIVITY	97	0.217162	2.49701	0	0.00053047	0.299
GO_POLYOL_METABOLIC_PROCESS	119	0.194802	2.49699	0	0.00052993	0.299
GO_NEGATIVE_REGULATION_OF_MICROTUBULE_POLYMERIZATION_OR_DEPOLYMERIZATION	35	0.34962	2.49621	0	0.000530923	0.3
GO_METAPHASE_PLATE_CONGRESSION	55	0.283123	2.49277	0	0.000540875	0.303
GO_PROTEIN_DEMETHYLATION	29	0.391656	2.48988	0	0.000546351	0.307
GO_BLOOD_VESSEL_ENDOTHELIAL_CELL_MIGRATION	134	0.182372	2.48913	0	0.000547268	0.308
GO_PEPTIDYL_PROLINE_MODIFICATION	50	0.295655	2.48873	0	0.000548223	0.309
GO_NEGATIVE_REGULATION_OF_PEPTIDYL_TYROSINE_PHOSPHORYLATION	52	0.295283	2.48619	0	0.000555035	0.313
GO_PROTEIN_MATURATION	253	0.133453	2.48177	0	0.000570946	0.321
GO_SCHWANN_CELL_DEVELOPMENT	29	0.383557	2.48033	0	0.000574875	0.323
GO_CILIUM_ORGANIZATION	351	0.114559	2.47862	0	0.000578766	0.323
GO_REGULATION_OF_SYNAPTIC_VESICLE_ENDOCYTOSIS	17	0.494255	2.47695	0	0.000579665	0.323
GO_POSITIVE_REGULATION_OF_CELL_SUBSTRATE_JUNCTION_ORGANIZATION	26	0.409825	2.47659	0	0.00058054	0.324
GO_AEROBIC_ELECTRON_TRANSPORT_CHAIN	16	0.513912	2.47272	0	0.000597771	0.333
GO_SPINDLE_LOCALIZATION	49	0.297678	2.47251	0	0.000600207	0.334
GO_FATTY_ACID_METABOLIC_PROCESS	325	0.118462	2.47248	0.00188324	0.000599605	0.334
GO_REGULATION_OF_HISTONE_MODIFICATION	133	0.186187	2.47186	0	0.00060201	0.336
GO_IRON_ION_TRANSPORT	68	0.254594	2.47148	0	0.000601407	0.336
GO_TERMINATION_OF_RNA_POLYMERASE_II_TRANSCRIPTION	34	0.366101	2.47108	0	0.000605232	0.337
GO_ADULT_LOCOMOTORY_BEHAVIOR	74	0.253148	2.47083	0	0.000604628	0.337
GO_MEMBRANE_DEPOLARIZATION	85	0.229069	2.47004	0	0.000605498	0.338
GO_RESPONSE_TO_ETHANOL	116	0.18937	2.46779	0	0.000619682	0.343
GO_REGULATION_OF_LONG_TERM_SYNAPTIC_POTENTIATION	44	0.309426	2.46669	0	0.000623464	0.345
GO_CHAPERONE_MEDIATED_AUTOPHAGY	16	0.512197	2.46576	0	0.000627293	0.348
GO_SNRNA_METABOLIC_PROCESS	30	0.37522	2.46496	0	0.000629586	0.349
GO_ESTABLISHMENT_OF_ENDOTHELIAL_BARRIER	43	0.313881	2.46362	0	0.000633384	0.35
GO_PEPTIDYL_SERINE_DEPHOSPHORYLATION	20	0.456225	2.46282	0	0.000640069	0.354
GO_AMINO_ACID_ACTIVATION	30	0.387025	2.46267	0	0.000640861	0.355
GO_NEURON_RECOGNITION	49	0.299736	2.45973	0	0.000654848	0.363
GO_POSITIVE_REGULATION_OF_MITOTIC_CELL_CYCLE	152	0.170127	2.45708	0	0.000674647	0.375
GO_GLIAL_CELL_MIGRATION	49	0.298382	2.45667	0	0.000675421	0.375
GO_ANATOMICAL_STRUCTURE_HOMEOSTASIS	375	0.110776	2.45632	0	0.000674754	0.375
GO_NEGATIVE_REGULATION_OF_REACTIVE_OXYGEN_SPECIES_BIOSYNTHETIC_PROCESS	28	0.390707	2.45351	0	0.000682827	0.38
GO_POSITIVE_REGULATION_OF_SMOOTH_MUSCLE_CELL_PROLIFERATION	88	0.222124	2.45235	0	0.000682154	0.38
GO_PROTEIN_HETEROOLIGOMERIZATION	75	0.240755	2.45193	0	0.000682922	0.381
GO_POSITIVE_REGULATION_OF_TRANSLATIONAL_INITIATION	26	0.406707	2.45176	0	0.000685158	0.382
GO_CLEAVAGE_INVOLVED_IN_RRNA_PROCESSING	21	0.460713	2.45032	0	0.000693116	0.386
GO_NEGATIVE_REGULATION_OF_PROTEIN_DEPHOSPHORYLATION	60	0.267852	2.44719	0	0.000711353	0.396
GO_GUANOSINE_CONTAINING_COMPOUND_METABOLIC_PROCESS	35	0.355651	2.44557	0	0.000719382	0.399
GO_GLYCOSYLCERAMIDE_METABOLIC_PROCESS	17	0.501689	2.44494	0	0.000724483	0.403
GO_POSITIVE_REGULATION_OF_DENDRITIC_SPINE_MORPHOGENESIS	22	0.423913	2.44417	0.00198807	0.000725241	0.404
GO_NEGATIVE_REGULATION_OF_REACTIVE_OXYGEN_SPECIES_METABOLIC_PROCESS	52	0.287869	2.44361	0	0.000728859	0.405
GO_NUCLEOTIDE_EXCISION_REPAIR_DNA_DAMAGE_RECOGNITION	23	0.422744	2.44261	0	0.000731063	0.405
GO_REGULATION_OF_PROTEIN_ACETYLATION	70	0.247604	2.4415	0	0.000734683	0.407
GO_NEGATIVE_REGULATION_OF_PROTEIN_SERINE_THREONINE_KINASE_ACTIVITY	132	0.181163	2.44095	0.00400802	0.000738292	0.409
GO_REGULATION_OF_PROTEIN_OLIGOMERIZATION	24	0.423484	2.44078	0	0.000737573	0.409
GO_REGULATION_OF_NITRIC_OXIDE_SYNTHASE_ACTIVITY	46	0.296283	2.44051	0	0.000738274	0.41
GO_PROTEIN_TRANSMEMBRANE_IMPORT_INTO_INTRACELLULAR_ORGANELLE	33	0.36293	2.44038	0	0.000738984	0.411
GO_REGULATION_OF_DNA_TEMPLATED_TRANSCRIPTION_ELONGATION	44	0.318376	2.44009	0	0.000739696	0.412
GO_POSITIVE_REGULATION_OF_CELL_SUBSTRATE_ADHESION	112	0.195968	2.43896	0	0.000746167	0.414
GO_RESPONSE_TO_MITOCHONDRIAL_DEPOLARISATION	18	0.48433	2.438	0	0.000745444	0.414
GO_REGULATION_OF_SUBSTRATE_ADHESION_DEPENDENT_CELL_SPREADING	49	0.295056	2.4379	0	0.000746221	0.415
GO_NEGATIVE_REGULATION_OF_GROWTH	220	0.142029	2.43767	0	0.0007455	0.415
GO_DNA_INTEGRITY_CHECKPOINT	143	0.17408	2.4358	0	0.000757787	0.419
GO_REGULATION_OF_MRNA_3_END_PROCESSING	26	0.395935	2.43489	0	0.000761275	0.421
GO_REGULATION_OF_NITRIC_OXIDE_BIOSYNTHETIC_PROCESS	58	0.263692	2.43489	0	0.000760541	0.421
GO_CENTRAL_NERVOUS_SYSTEM_PROJECTION_NEURON_AXONOGENESIS	23	0.416428	2.43419	0	0.000764102	0.423
GO_REGULATION_OF_PRESYNAPSE_ORGANIZATION	32	0.357274	2.43335	0	0.000769146	0.425
GO_REGULATION_OF_EPITHELIAL_CELL_MIGRATION	239	0.136398	2.43009	0	0.000786734	0.432
GO_PROTEIN_DEMANNOSYLATION	18	0.475717	2.42998	0	0.000785978	0.432
GO_REGULATION_OF_TELOMERASE_ACTIVITY	46	0.298537	2.42899	0	0.000790846	0.434
GO_NEGATIVE_REGULATION_OF_CELL_MOTILITY	282	0.127152	2.42658	0	0.000817107	0.44
GO_PROTEIN_LOCALIZATION_TO_ENDOSOME	23	0.424415	2.42645	0	0.000816324	0.44
GO_REGULATION_OF_INSULIN_SECRETION	167	0.158424	2.42361	0	0.000826867	0.443
GO_POSITIVE_REGULATION_OF_NERVOUS_SYSTEM_PROCESS	61	0.269478	2.42323	0	0.000828945	0.444
GO_REGULATION_OF_POSTSYNAPTIC_MEMBRANE_POTENTIAL	141	0.174825	2.42041	0.0021097	0.000846591	0.45
GO_RIBONUCLEOSIDE_METABOLIC_PROCESS	58	0.271884	2.42034	0.00201613	0.000845783	0.45
GO_MITOCHONDRIAL_CALCIUM_ION_TRANSMEMBRANE_TRANSPORT	23	0.425457	2.42013	0	0.000850643	0.453
GO_NEGATIVE_REGULATION_OF_RECEPTOR_MEDIATED_ENDOCYTOSIS	25	0.413735	2.41992	0	0.000852649	0.454
GO_ACTIN_CYTOSKELETON_REORGANIZATION	99	0.211648	2.41703	0	0.000870149	0.462
GO_ENDOTHELIAL_CELL_DEVELOPMENT	58	0.275276	2.41671	0	0.000876374	0.465
GO_HIPPOCAMPUS_DEVELOPMENT	81	0.22779	2.41547	0	0.000882527	0.468
GO_POSTSYNAPTIC_SIGNAL_TRANSDUCTION	37	0.337092	2.41278	0.00203252	0.000898405	0.474
GO_CALCIUM_ION_TRANSMEMBRANE_TRANSPORT	305	0.120265	2.41251	0	0.000900383	0.475
GO_MATURATION_OF_LSU_RRNA	20	0.439796	2.40842	0	0.000937401	0.49
GO_CELLULAR_RESPONSE_TO_DSRNA	20	0.440832	2.40814	0	0.000937936	0.491
GO_RESPONSE_TO_ISCHEMIA	46	0.3027	2.40695	0	0.000945359	0.493
GO_REGULATION_OF_TRANSCRIPTION_BY_RNA_POLYMERASE_III	20	0.450174	2.4056	0	0.00095281	0.495
GO_NUCLEAR_CHROMOSOME_SEGREGATION	231	0.136317	2.40487	0.00430108	0.000958846	0.497
GO_REGULATION_OF_GENE_SILENCING	106	0.201266	2.4047	0	0.000959336	0.498
GO_ENDOPLASMIC_RETICULUM_MANNOSE_TRIMMING	15	0.509008	2.40381	0	0.000969613	0.504
GO_REGULATION_OF_ERBB_SIGNALING_PATHWAY	86	0.22123	2.40027	0.00193798	0.00099376	0.513
GO_NUCLEOTIDE_PHOSPHORYLATION	122	0.18688	2.39935	0	0.000997031	0.514
GO_RESPONSE_TO_ALCOHOL	216	0.142419	2.39862	0	0.00100019	0.515
GO_POSITIVE_REGULATION_OF_TRANSPORTER_ACTIVITY	107	0.196396	2.39698	0	0.00101595	0.521
GO_REACTIVE_OXYGEN_SPECIES_BIOSYNTHETIC_PROCESS	103	0.207218	2.39432	0	0.00104691	0.533
GO_RESPONSE_TO_TYPE_I_INTERFERON	79	0.231916	2.39354	0	0.00105009	0.534
GO_POSITIVE_REGULATION_OF_MICROTUBULE_POLYMERIZATION_OR_DEPOLYMERIZATION	32	0.360606	2.39181	0	0.00106446	0.539
GO_NON_RECOMBINATIONAL_REPAIR	68	0.24631	2.39128	0	0.0010676	0.542
GO_LYSOSOME_LOCALIZATION	67	0.245569	2.39061	0	0.00107629	0.544
GO_GLYCOLIPID_BIOSYNTHETIC_PROCESS	64	0.251758	2.38804	0	0.00110455	0.556
GO_NEGATIVE_REGULATION_OF_AMYLOID_PRECURSOR_PROTEIN_CATABOLIC_PROCESS	15	0.502609	2.38659	0	0.00110631	0.557
GO_L_GLUTAMATE_TRANSMEMBRANE_TRANSPORT	23	0.408024	2.38433	0	0.00112457	0.562
GO_NEGATIVE_REGULATION_OF_RHO_PROTEIN_SIGNAL_TRANSDUCTION	21	0.442598	2.38234	0.0019802	0.00113188	0.563
GO_SYNAPTIC_TRANSMISSION_GABAERGIC	43	0.305429	2.38059	0.0020202	0.00114321	0.569
GO_MITOCHONDRIAL_FISSION	35	0.336949	2.37829	0.00395257	0.0011724	0.577
GO_NUCLEOTIDE_SUGAR_METABOLIC_PROCESS	37	0.33719	2.37643	0	0.00118075	0.58
GO_CELLULAR_RESPONSE_TO_INORGANIC_SUBSTANCE	196	0.145765	2.37553	0	0.00118651	0.583
GO_NEGATIVE_REGULATION_OF_ENDOCYTOSIS	44	0.310538	2.3755	0	0.00118542	0.583
GO_NEUROMUSCULAR_PROCESS	103	0.201385	2.3747	0	0.00118569	0.584
GO_PROTEIN_PALMITOYLATION	32	0.364697	2.37411	0.002	0.00118733	0.584
GO_REGULATION_OF_POTASSIUM_ION_TRANSPORT	94	0.211136	2.37128	0	0.0012026	0.586
GO_MUCOPOLYSACCHARIDE_METABOLIC_PROCESS	111	0.193111	2.37036	0.00194553	0.00120688	0.586
GO_ACTIVATION_OF_MAPKK_ACTIVITY	50	0.283576	2.36848	0	0.00122625	0.594
GO_TRANSFERRIN_TRANSPORT	34	0.350304	2.36732	0.002	0.00123194	0.594
GO_RNA_PHOSPHODIESTER_BOND_HYDROLYSIS_EXONUCLEOLYTIC	41	0.312722	2.36582	0.00185529	0.00124036	0.597
GO_ACTIVATION_OF_GTPASE_ACTIVITY	79	0.22342	2.36539	0.0019685	0.0012406	0.598
GO_BARBED_END_ACTIN_FILAMENT_CAPPING	18	0.463334	2.36493	0	0.00124221	0.599
GO_REGULATION_OF_RECEPTOR_LOCALIZATION_TO_SYNAPSE	17	0.4719	2.36431	0	0.00125202	0.602
GO_REGULATION_OF_GLIOGENESIS	114	0.186047	2.36422	0	0.00125224	0.602
GO_MITOTIC_METAPHASE_PLATE_CONGRESSION	42	0.309953	2.36337	0	0.00125927	0.605
GO_ACTIVATION_OF_MAPK_ACTIVITY	143	0.167788	2.36167	0.00198413	0.00126897	0.605
GO_FIBROBLAST_MIGRATION	37	0.324647	2.36118	0.00196078	0.00126915	0.605
GO_MEMBRANE_PROTEIN_ECTODOMAIN_PROTEOLYSIS	41	0.310138	2.36092	0	0.00127209	0.605
GO_MEMBRANE_BIOGENESIS	39	0.322278	2.35979	0.00195695	0.00127762	0.608
GO_ADENYLATE_CYCLASE_INHIBITING_G_PROTEIN_COUPLED_RECEPTOR_SIGNALING_PATHWAY	79	0.231447	2.35872	0	0.00128864	0.613
GO_NEGATIVE_REGULATION_OF_EXTRINSIC_APOPTOTIC_SIGNALING_PATHWAY	99	0.199099	2.35835	0	0.00129016	0.613
GO_REGULATION_OF_CARBOHYDRATE_CATABOLIC_PROCESS	80	0.223544	2.35504	0	0.00131992	0.622
GO_WALKING_BEHAVIOR	30	0.351944	2.35363	0	0.00133762	0.624
GO_NEGATIVE_REGULATION_OF_CELL_SUBSTRATE_ADHESION	60	0.258868	2.3532	0	0.00133909	0.624
GO_MITOCHONDRIAL_RNA_PROCESSING	16	0.497052	2.35056	0	0.00136486	0.63
GO_ATP_DEPENDENT_CHROMATIN_REMODELING	71	0.236821	2.35041	0	0.00136497	0.63
GO_REGULATION_OF_VIRAL_GENOME_REPLICATION	81	0.225463	2.34703	0.004158	0.00139192	0.638
GO_POSITIVE_REGULATION_OF_AUTOPHAGY_OF_MITOCHONDRION	18	0.453765	2.34683	0	0.00139338	0.639
GO_NON_MOTILE_CILIUM_ASSEMBLY	52	0.282807	2.34661	0.00200401	0.00139612	0.64
GO_HEPARAN_SULFATE_PROTEOGLYCAN_BIOSYNTHETIC_PROCESS	26	0.38329	2.34566	0	0.00140426	0.642
GO_GTP_METABOLIC_PROCESS	22	0.419142	2.34428	0	0.00141099	0.644
GO_ERYTHROCYTE_HOMEOSTASIS	112	0.188154	2.34366	0	0.00141506	0.646
GO_POSITIVE_REGULATION_OF_STRESS_ACTIVATED_PROTEIN_KINASE_SIGNALING_CASCADE	153	0.162778	2.3419	0	0.00143373	0.653
GO_MRNA_MODIFICATION	21	0.430487	2.34183	0	0.00143244	0.653
GO_MICROTUBULE_ORGANIZING_CENTER_LOCALIZATION	29	0.374823	2.34085	0	0.00143776	0.654
GO_MITOTIC_SPINDLE_ASSEMBLY	52	0.276992	2.3401	0.00194175	0.00144849	0.656
GO_NEGATIVE_REGULATION_OF_NEUROTRANSMITTER_TRANSPORT	20	0.426958	2.33953	0	0.00145257	0.656
GO_CYTOSOLIC_CALCIUM_ION_TRANSPORT	168	0.152986	2.33895	0.00192678	0.00146049	0.658
GO_ADP_METABOLIC_PROCESS	113	0.184715	2.33888	0	0.00146047	0.658
GO_NEUROMUSCULAR_JUNCTION_DEVELOPMENT	48	0.285311	2.33583	0	0.00148563	0.668
GO_REGULATION_OF_PROTEIN_TARGETING_TO_MITOCHONDRION	41	0.310427	2.33572	0	0.0014843	0.668
GO_INOSITOL_LIPID_MEDIATED_SIGNALING	182	0.147706	2.33534	0	0.00148558	0.669
GO_SYNAPTIC_VESICLE_CLUSTERING	16	0.47916	2.33494	0	0.00149478	0.671
GO_CIRCADIAN_RHYTHM	203	0.139976	2.33386	0	0.00150535	0.672
GO_HISTONE_UBIQUITINATION	44	0.29761	2.33288	0	0.00151191	0.676
GO_REGULATION_OF_CALCIUM_ION_TRANSMEMBRANE_TRANSPORT	138	0.171327	2.33229	0	0.00151715	0.676
GO_HISTONE_H4_K5_ACETYLATION	16	0.478458	2.33224	0	0.0015158	0.676
GO_LIPID_OXIDATION	99	0.197796	2.33078	0	0.00153811	0.681
GO_G_PROTEIN_COUPLED_RECEPTOR_SIGNALING_PATHWAY_COUPLED_TO_CYCLIC_NUCLEOTIDE_SECOND_MESSENGER	226	0.129511	2.33032	0	0.00154333	0.682
GO_POSITIVE_REGULATION_OF_ENDOCYTOSIS	97	0.204634	2.32964	0	0.00155512	0.684
GO_RESPONSE_TO_TUMOR_NECROSIS_FACTOR	276	0.121632	2.32954	0	0.00155638	0.685
GO_EXTRINSIC_APOPTOTIC_SIGNALING_PATHWAY_VIA_DEATH_DOMAIN_RECEPTORS	80	0.223122	2.32866	0	0.00156683	0.686
GO_POSITIVE_REGULATION_OF_ION_TRANSMEMBRANE_TRANSPORT	145	0.166502	2.32549	0	0.0015968	0.694
GO_REGULATION_OF_RESPONSE_TO_DRUG	90	0.205316	2.31878	0	0.00166202	0.713
GO_LONG_TERM_SYNAPTIC_DEPRESSION	30	0.348187	2.31372	0.00402414	0.00173224	0.729
GO_POSITIVE_REGULATION_OF_RESPONSE_TO_DNA_DAMAGE_STIMULUS	89	0.206839	2.31248	0.00205339	0.00174903	0.735
GO_DEMETHYLATION	53	0.27208	2.31111	0	0.00177089	0.738
GO_RESPONSE_TO_LEAD_ION	24	0.392653	2.3102	0	0.00177986	0.738
GO_MICROTUBULE_DEPOLYMERIZATION	41	0.30992	2.30705	0	0.00181474	0.743
GO_RESPONSE_TO_CADMIUM_ION	48	0.281271	2.30404	0.00198807	0.00184171	0.745
GO_NEGATIVE_REGULATION_OF_HYDROLASE_ACTIVITY	396	0.100403	2.30294	0	0.00185047	0.747
GO_REGULATION_OF_TRANSLATION_IN_RESPONSE_TO_STRESS	18	0.453607	2.30191	0	0.00186457	0.751
GO_REGULATION_OF_CALCIUM_ION_TRANSPORT	232	0.130913	2.30113	0	0.00187724	0.752
GO_POSITIVE_REGULATION_OF_GLIAL_CELL_DIFFERENTIATION	39	0.311133	2.30073	0	0.00188082	0.753
GO_HISTONE_H2A_ACETYLATION	16	0.481535	2.30015	0	0.00188306	0.754
GO_POSITIVE_REGULATION_OF_GENE_EXPRESSION_EPIGENETIC	51	0.268445	2.29905	0.00200803	0.00189684	0.755
GO_CEREBRAL_CORTEX_CELL_MIGRATION	42	0.296217	2.29737	0.00408998	0.0019263	0.765
GO_PHYSIOLOGICAL_CARDIAC_MUSCLE_HYPERTROPHY	30	0.348566	2.29721	0	0.00192723	0.765
GO_RESPONSE_TO_DSRNA	42	0.300942	2.29632	0	0.00193849	0.767
GO_REGULATION_OF_ANOIKIS	21	0.411114	2.29478	0	0.00195739	0.774
GO_MITOCHONDRIAL_CALCIUM_ION_HOMEOSTASIS	22	0.406592	2.29298	0	0.00197224	0.779
GO_GLIAL_CELL_PROLIFERATION	47	0.290174	2.29294	0.00199203	0.00197052	0.779
GO_PROTEIN_INSERTION_INTO_MEMBRANE	53	0.266229	2.29294	0	0.00196881	0.779
GO_INNER_MITOCHONDRIAL_MEMBRANE_ORGANIZATION	26	0.376573	2.29124	0	0.00199021	0.781
GO_SMOOTH_MUSCLE_CELL_PROLIFERATION	140	0.167357	2.29056	0	0.00200388	0.785
GO_HEPARAN_SULFATE_PROTEOGLYCAN_METABOLIC_PROCESS	32	0.340957	2.29052	0.00208333	0.00200214	0.785
GO_CELLULAR_RESPONSE_TO_ACID_CHEMICAL	193	0.140176	2.2895	0.00194932	0.00201322	0.786
GO_REGULATION_OF_CHOLESTEROL_METABOLIC_PROCESS	55	0.262441	2.28923	0.00203252	0.00202177	0.787
GO_GLOBAL_GENOME_NUCLEOTIDE_EXCISION_REPAIR	26	0.365023	2.28789	0	0.00204579	0.794
GO_METENCEPHALON_DEVELOPMENT	104	0.191205	2.28669	0.00194175	0.00205429	0.795
GO_REGULATION_OF_POSTSYNAPTIC_DENSITY_ORGANIZATION	15	0.487039	2.28547	0	0.00206528	0.796
GO_ERK1_AND_ERK2_CASCADE	277	0.120406	2.28333	0	0.0020979	0.804
GO_POSITIVE_REGULATION_OF_TELOMERASE_ACTIVITY	35	0.323894	2.28279	0	0.00211272	0.809
GO_REGULATION_OF_DNA_REPAIR	106	0.18519	2.27934	0	0.00214775	0.814
GO_NEURON_DEATH_IN_RESPONSE_TO_OXIDATIVE_STRESS	26	0.373791	2.27771	0.00189753	0.00216619	0.815
GO_REGULATION_OF_FIBROBLAST_MIGRATION	29	0.348792	2.27766	0	0.00216433	0.815
GO_RESPONSE_TO_ALKALOID	101	0.191957	2.27704	0.00389864	0.00216755	0.815
GO_PORE_COMPLEX_ASSEMBLY	19	0.431434	2.27533	0	0.00219364	0.823
GO_PYRUVATE_METABOLIC_PROCESS	141	0.163704	2.27493	0	0.00220195	0.823
GO_LIPID_PHOSPHORYLATION	62	0.240529	2.27421	0.00199203	0.00221149	0.826
GO_CARBOHYDRATE_DERIVATIVE_CATABOLIC_PROCESS	170	0.148691	2.27167	0.0020284	0.00224642	0.831
GO_RESPONSE_TO_XENOBIOTIC_STIMULUS	240	0.1254	2.26924	0.002	0.00228487	0.838
GO_MEMBRANE_PROTEIN_PROTEOLYSIS	57	0.256737	2.2678	0	0.00231202	0.844
GO_PEPTIDYL_TYROSINE_DEPHOSPHORYLATION	97	0.195703	2.26469	0	0.00236568	0.852
GO_REGULATION_OF_MICROTUBULE_DEPOLYMERIZATION	27	0.362649	2.26237	0.00207039	0.00240284	0.859
GO_MODULATION_OF_EXCITATORY_POSTSYNAPTIC_POTENTIAL	41	0.301199	2.26192	0.00198413	0.00240588	0.859
GO_MICROTUBULE_ANCHORING	26	0.373772	2.26067	0.00204499	0.00242773	0.861
GO_POSITIVE_REGULATION_OF_MRNA_SPLICING_VIA_SPLICEOSOME	20	0.420832	2.25984	0	0.00244197	0.862
GO_PROTEIN_MANNOSYLATION	22	0.397575	2.25929	0.00204082	0.00244367	0.862
GO_HEME_BIOSYNTHETIC_PROCESS	21	0.415964	2.25814	0	0.00245655	0.864
GO_NUCLEOTIDE_BINDING_DOMAIN_LEUCINE_RICH_REPEAT_CONTAINING_RECEPTOR_SIGNALING_PATHWAY	35	0.327036	2.25782	0	0.00245571	0.864
GO_REGULATION_OF_RUFFLE_ASSEMBLY	28	0.360686	2.25687	0.00198807	0.00246738	0.865
GO_PURINE_NUCLEOSIDE_METABOLIC_PROCESS	54	0.267354	2.25649	0	0.00247025	0.865
GO_NEGATIVE_REGULATION_OF_VIRAL_RELEASE_FROM_HOST_CELL	15	0.478969	2.25439	0	0.00249317	0.866
GO_PYRIMIDINE_CONTAINING_COMPOUND_BIOSYNTHETIC_PROCESS	47	0.271857	2.25412	0.00192678	0.00249355	0.866
GO_ACTIVATION_OF_PROTEIN_KINASE_A_ACTIVITY	17	0.455779	2.25331	0	0.00250893	0.867
GO_REGULATION_OF_SYNAPTIC_TRANSMISSION_GLUTAMATERGIC	64	0.243313	2.25245	0	0.00251927	0.869
GO_POSITIVE_REGULATION_OF_SECRETION	392	0.0996354	2.25173	0.00389105	0.00252964	0.87
GO_POSITIVE_REGULATION_OF_DNA_TEMPLATED_TRANSCRIPTION_INITIATION	26	0.361002	2.24999	0.0041841	0.0025549	0.875
GO_REGULATION_OF_OLIGODENDROCYTE_DIFFERENTIATION	36	0.306933	2.24806	0.00204918	0.00257907	0.875
GO_PROTEIN_O_LINKED_MANNOSYLATION	17	0.448326	2.24697	0.0019305	0.00259186	0.877
GO_TETRAPYRROLE_BIOSYNTHETIC_PROCESS	28	0.344576	2.24615	0	0.0025983	0.877
GO_TRNA_WOBBLE_URIDINE_MODIFICATION	15	0.495568	2.24445	0.00209205	0.00262717	0.879
GO_HISTONE_PHOSPHORYLATION	35	0.317503	2.24357	0	0.00264109	0.879
GO_MEMBRANE_DISASSEMBLY	16	0.457372	2.24324	0.002	0.00264011	0.879
GO_AMINO_SUGAR_METABOLIC_PROCESS	35	0.323241	2.24234	0	0.00264771	0.881
GO_CELLULAR_RESPONSE_TO_TOXIC_SUBSTANCE	213	0.129992	2.24174	0.00206186	0.00266419	0.883
GO_REGULATION_OF_PEPTIDYL_LYSINE_ACETYLATION	58	0.250927	2.24139	0.004	0.00266816	0.884
GO_METAPHASE_ANAPHASE_TRANSITION_OF_CELL_CYCLE	55	0.261686	2.24121	0	0.00267332	0.885
GO_DOUBLE_STRAND_BREAK_REPAIR	210	0.132566	2.23648	0	0.00275643	0.893
GO_ORGANOPHOSPHATE_CATABOLIC_PROCESS	126	0.168701	2.23642	0.00197628	0.00275661	0.893
GO_CELL_CELL_JUNCTION_ORGANIZATION	179	0.143745	2.23447	0.00211864	0.00279625	0.896
GO_AXONAL_FASCICULATION	23	0.394382	2.23401	0	0.00280258	0.897
GO_PRODUCTION_OF_SMALL_RNA_INVOLVED_IN_GENE_SILENCING_BY_RNA	47	0.271766	2.23384	0	0.00280514	0.897
GO_NEGATIVE_REGULATION_OF_SMOOTH_MUSCLE_CELL_MIGRATION	27	0.365152	2.23377	0	0.00280404	0.897
GO_BASEMENT_MEMBRANE_ORGANIZATION	28	0.346417	2.23313	0	0.00281518	0.898
GO_PERIPHERAL_NERVOUS_SYSTEM_DEVELOPMENT	73	0.222423	2.22965	0	0.00286188	0.902
GO_ENDOTHELIAL_CELL_PROLIFERATION	156	0.157307	2.22789	0.00196464	0.00289626	0.904
GO_POSITIVE_REGULATION_OF_CYCLIN_DEPENDENT_PROTEIN_KINASE_ACTIVITY	33	0.324764	2.22665	0	0.00291833	0.905
GO_ADHERENS_JUNCTION_ORGANIZATION	63	0.236262	2.22584	0.00623701	0.00292823	0.906
GO_RESPONSE_TO_MECHANICAL_STIMULUS	203	0.131983	2.2254	0.00194553	0.00293568	0.907
GO_NEGATIVE_REGULATION_OF_ORGANIC_ACID_TRANSPORT	18	0.429136	2.22531	0	0.00293453	0.907
GO_NEGATIVE_REGULATION_OF_MAP_KINASE_ACTIVITY	74	0.219449	2.22517	0.0020202	0.00293334	0.907
GO_POSITIVE_REGULATION_OF_PROTEIN_TYROSINE_KINASE_ACTIVITY	51	0.269051	2.22357	0	0.00296876	0.909
GO_NEGATIVE_REGULATION_OF_PEPTIDYL_SERINE_PHOSPHORYLATION	27	0.35556	2.22279	0	0.00297723	0.91
GO_PYRIMIDINE_NUCLEOTIDE_METABOLIC_PROCESS	54	0.255484	2.22271	0.00379507	0.00297721	0.91
GO_RNA_POLYMERASE_II_PREINITIATION_COMPLEX_ASSEMBLY	26	0.358052	2.22266	0.00411523	0.00297476	0.91
GO_SUBSTRATE_ADHESION_DEPENDENT_CELL_SPREADING	93	0.195357	2.22223	0	0.00298808	0.912
GO_NEGATIVE_REGULATION_OF_CELL_MATRIX_ADHESION	38	0.304337	2.22177	0.00203666	0.00299418	0.912
GO_ORGANIC_ACID_TRANSMEMBRANE_TRANSPORT	128	0.168224	2.22117	0.00210526	0.00301359	0.912
GO_TUMOR_NECROSIS_FACTOR_MEDIATED_SIGNALING_PATHWAY	155	0.154921	2.22056	0	0.00302706	0.913
GO_ACTION_POTENTIAL	126	0.169959	2.22003	0	0.00303433	0.915
GO_REGULATION_OF_ENDOTHELIAL_CELL_MIGRATION	178	0.142332	2.21979	0	0.0030367	0.916
GO_REGULATION_OF_ORGANIC_ACID_TRANSPORT	53	0.256444	2.21859	0	0.00305117	0.916
GO_RESPONSE_TO_CALCIUM_ION	144	0.157102	2.21637	0	0.00309233	0.917
GO_REGULATION_OF_PROTEIN_DEACETYLATION	39	0.305583	2.216	0	0.00309701	0.917
GO_PROTEIN_KINASE_B_SIGNALING	244	0.122494	2.21338	0.00215983	0.00315637	0.918
GO_POSITIVE_REGULATION_OF_VIRAL_GENOME_REPLICATION	35	0.31685	2.21016	0	0.00321539	0.921
GO_SYNAPSE_MATURATION	25	0.363607	2.20919	0.00392157	0.00323101	0.921
GO_ESTABLISHMENT_OF_MITOTIC_SPINDLE_LOCALIZATION	34	0.315202	2.20909	0	0.00323078	0.921
GO_CARBOHYDRATE_HOMEOSTASIS	223	0.125658	2.2088	0	0.0032354	0.923
GO_ESTABLISHMENT_OF_PROTEIN_LOCALIZATION_TO_CHROMOSOME	22	0.39279	2.20829	0.00570342	0.00324477	0.924
GO_REGULATION_OF_CYCLIN_DEPENDENT_PROTEIN_KINASE_ACTIVITY	97	0.192909	2.20536	0	0.00331075	0.928
GO_REGULATION_OF_RELEASE_OF_CYTOCHROME_C_FROM_MITOCHONDRIA	45	0.276377	2.20296	0	0.00336442	0.93
GO_REGULATION_OF_G_PROTEIN_COUPLED_RECEPTOR_SIGNALING_PATHWAY	137	0.163751	2.20264	0.00396825	0.00337005	0.93
GO_RNA_DESTABILIZATION	31	0.334115	2.20152	0.00383142	0.00339017	0.93
GO_LAMELLIPODIUM_ASSEMBLY	61	0.233614	2.20056	0.00404858	0.00341141	0.933
GO_ACTIN_FILAMENT_DEPOLYMERIZATION	51	0.262222	2.19956	0.00581395	0.00343149	0.934
GO_NEUROTROPHIN_TRK_RECEPTOR_SIGNALING_PATHWAY	31	0.340617	2.19929	0.0019802	0.00343356	0.934
GO_NEGATIVE_REGULATION_OF_ANOIKIS	15	0.477715	2.19913	0	0.00343676	0.935
GO_OLIGOSACCHARIDE_LIPID_INTERMEDIATE_BIOSYNTHETIC_PROCESS	19	0.427462	2.19884	0	0.00343878	0.935
GO_REGULATION_OF_RELEASE_OF_SEQUESTERED_CALCIUM_ION_INTO_CYTOSOL	73	0.217333	2.19545	0	0.00353372	0.942
GO_POSTSYNAPSE_ASSEMBLY	29	0.335424	2.19412	0	0.0035702	0.945
GO_NEGATIVE_REGULATION_OF_ION_TRANSPORT	134	0.1601	2.19176	0	0.00362465	0.946
GO_CELLULAR_RESPONSE_TO_UV	71	0.222355	2.19167	0	0.00362763	0.948
GO_REGULATION_OF_CYTOKINESIS	81	0.206076	2.18891	0.00218341	0.00368894	0.951
GO_POSITIVE_REGULATION_OF_MYELINATION	16	0.450656	2.18754	0.00386847	0.0037108	0.955
GO_ACTOMYOSIN_STRUCTURE_ORGANIZATION	190	0.136405	2.18725	0	0.0037102	0.956
GO_REGULATION_OF_PROTEIN_IMPORT	57	0.241138	2.18625	0.00203666	0.00372152	0.956
GO_POSITIVE_REGULATION_OF_PROTEIN_TARGETING_TO_MITOCHONDRION	31	0.318589	2.18428	0.00200803	0.00376357	0.957
GO_REGULATION_OF_PROGRAMMED_NECROTIC_CELL_DEATH	18	0.419183	2.18403	0.0021322	0.00376411	0.957
GO_REGULATION_OF_ARP2_3_COMPLEX_MEDIATED_ACTIN_NUCLEATION	16	0.462921	2.18393	0	0.00376226	0.957
GO_POSITIVE_REGULATION_OF_VIRAL_TRANSCRIPTION	38	0.301513	2.18351	0.00397614	0.00376636	0.957
GO_REGULATION_OF_AMINO_ACID_TRANSPORT	31	0.329348	2.17959	0.00195695	0.00385436	0.96
GO_CELLULAR_RESPONSE_TO_RADIATION	165	0.141945	2.17935	0.00195695	0.00385957	0.96
GO_POSITIVE_REGULATION_OF_EPITHELIAL_CELL_MIGRATION	150	0.153975	2.17885	0	0.00386601	0.96
GO_REGULATION_OF_POTASSIUM_ION_TRANSMEMBRANE_TRANSPORT	78	0.213447	2.1774	0.00197628	0.00390298	0.96
GO_ACETYL_COA_BIOSYNTHETIC_PROCESS	22	0.385335	2.17604	0	0.00392826	0.96
GO_CELLULAR_CARBOHYDRATE_CATABOLIC_PROCESS	41	0.285158	2.1756	0.00194553	0.00393811	0.96
GO_MITOCHONDRION_MORPHOGENESIS	21	0.387195	2.17546	0.0020284	0.00393617	0.96
GO_CYTOPLASMIC_PATTERN_RECOGNITION_RECEPTOR_SIGNALING_PATHWAY_IN_RESPONSE_TO_VIRUS	23	0.37056	2.17442	0.00378072	0.00395538	0.962
GO_REGULATION_OF_PEPTIDE_HORMONE_SECRETION	196	0.1337	2.17439	0	0.00395224	0.962
GO_POSITIVE_REGULATION_OF_TRANSCRIPTION_INITIATION_FROM_RNA_POLYMERASE_II_PROMOTER	19	0.415952	2.17403	0.00205761	0.00396314	0.962
GO_POTASSIUM_ION_TRANSPORT	225	0.125857	2.17312	0	0.00398575	0.963
GO_GLUTATHIONE_METABOLIC_PROCESS	48	0.268726	2.17227	0.00399202	0.00399902	0.963
GO_G1_DNA_DAMAGE_CHECKPOINT	62	0.232382	2.17219	0.00196078	0.00399818	0.963
GO_REGULATION_OF_ANION_TRANSPORT	86	0.200884	2.17027	0.00204918	0.00404881	0.964
GO_POSITIVE_REGULATION_OF_GLIOGENESIS	70	0.218335	2.16988	0	0.00406191	0.964
GO_REGULATION_OF_DEFENSE_RESPONSE_TO_VIRUS_BY_VIRUS	29	0.336539	2.16662	0.00201207	0.00415229	0.967
GO_NUCLEOSIDE_MONOPHOSPHATE_BIOSYNTHETIC_PROCESS	40	0.288546	2.16358	0	0.00424352	0.97
GO_RESPONSE_TO_ACETYLCHOLINE	30	0.322585	2.16021	0.00192678	0.00435142	0.97
GO_NUCLEOSIDE_PHOSPHATE_CATABOLIC_PROCESS	66	0.221588	2.15797	0.00194175	0.00440633	0.97
GO_NEGATIVE_REGULATION_OF_OXIDATIVE_STRESS_INDUCED_INTRINSIC_APOPTOTIC_SIGNALING_PATHWAY	17	0.437778	2.15598	0	0.00445988	0.971
GO_PROTEIN_LOCALIZATION_TO_MICROTUBULE	18	0.423915	2.15517	0	0.00448543	0.971
GO_REGULATION_OF_PROTEIN_HOMODIMERIZATION_ACTIVITY	19	0.410219	2.15415	0	0.00451462	0.972
GO_REGULATION_OF_ANION_TRANSMEMBRANE_TRANSPORT	25	0.363347	2.15134	0.0056926	0.00458673	0.973
GO_FATTY_ACID_BETA_OXIDATION	70	0.224317	2.15109	0.0038835	0.00459705	0.973
GO_GLYCOGEN_BIOSYNTHETIC_PROCESS	40	0.287583	2.14757	0.00201207	0.0046978	0.975
GO_NEGATIVE_REGULATION_OF_VASCULATURE_DEVELOPMENT	137	0.15557	2.1448	0	0.00477297	0.976
GO_ENDOPLASMIC_RETICULUM_CALCIUM_ION_HOMEOSTASIS	22	0.382166	2.14475	0.00201613	0.00477272	0.976
GO_NEUROINFLAMMATORY_RESPONSE	65	0.229234	2.14475	0.00198413	0.00476899	0.976
GO_POSITIVE_REGULATION_OF_CELL_JUNCTION_ASSEMBLY	36	0.292297	2.14223	0.00383877	0.00485287	0.982
GO_HORMONE_TRANSPORT	298	0.10613	2.1417	0.0019802	0.00486052	0.983
GO_POSITIVE_REGULATION_OF_SODIUM_ION_TRANSMEMBRANE_TRANSPORTER_ACTIVITY	16	0.437331	2.14126	0	0.00487174	0.983
GO_REGULATION_OF_MITOCHONDRIAL_GENE_EXPRESSION	26	0.347503	2.13991	0	0.00492788	0.985
GO_RESPIRATORY_CHAIN_COMPLEX_IV_ASSEMBLY	21	0.389684	2.13991	0.0039604	0.00492519	0.985
GO_PURINE_CONTAINING_COMPOUND_CATABOLIC_PROCESS	47	0.268728	2.13947	0.00406504	0.00493178	0.985
GO_REGULATION_OF_CALCIUM_ION_TRANSPORT_INTO_CYTOSOL	93	0.190461	2.13688	0	0.00503068	0.987
GO_TRANSFORMING_GROWTH_FACTOR_BETA_RECEPTOR_SIGNALING_PATHWAY	178	0.135287	2.13684	0.00410678	0.00502792	0.987
GO_REGULATION_OF_AXON_GUIDANCE	43	0.273668	2.13675	0.00193424	0.00502974	0.988
GO_HISTONE_H4_K16_ACETYLATION	20	0.397978	2.13647	0.0020284	0.00503156	0.988
GO_TRANSCYTOSIS	20	0.395123	2.13511	0.00400802	0.00507821	0.989
GO_PH_REDUCTION	47	0.267624	2.1342	0.00383142	0.00510429	0.989
GO_NEGATIVE_REGULATION_OF_RECEPTOR_SIGNALING_PATHWAY_VIA_STAT	25	0.352416	2.1331	0.00407332	0.00513349	0.989
GO_PERK_MEDIATED_UNFOLDED_PROTEIN_RESPONSE	20	0.391541	2.12715	0	0.00532988	0.99
GO_NEURONAL_STEM_CELL_POPULATION_MAINTENANCE	22	0.37103	2.12565	0	0.00538183	0.99
GO_PURINE_NUCLEOSIDE_BIOSYNTHETIC_PROCESS	17	0.437778	2.12402	0.00193424	0.00543153	0.991
GO_NEGATIVE_REGULATION_OF_PROTEIN_TYROSINE_KINASE_ACTIVITY	29	0.326529	2.12336	0	0.00544552	0.991
GO_POSITIVE_REGULATION_OF_BLOOD_VESSEL_DIAMETER	56	0.245064	2.12324	0.002	0.00544591	0.991
GO_NEGATIVE_REGULATION_OF_CELL_CYCLE_G1_S_PHASE_TRANSITION	106	0.170067	2.12217	0.00205339	0.00547499	0.992
GO_MUSCLE_HYPERTROPHY	92	0.189375	2.12007	0	0.00556311	0.993
GO_POSITIVE_REGULATION_OF_CHROMATIN_ORGANIZATION	98	0.183264	2.12003	0.00204499	0.00556336	0.993
GO_POSITIVE_REGULATION_OF_SUBSTRATE_ADHESION_DEPENDENT_CELL_SPREADING	37	0.302503	2.11921	0	0.00559102	0.993
GO_REGULATION_OF_VIRAL_TRANSCRIPTION	61	0.230016	2.11791	0.00592885	0.00564219	0.993
GO_ESTABLISHMENT_OF_PROTEIN_LOCALIZATION_TO_TELOMERE	16	0.441601	2.11687	0.00410678	0.0056833	0.993
GO_MRNA_CLEAVAGE	22	0.374978	2.11641	0	0.00569483	0.993
GO_GLIAL_CELL_ACTIVATION	53	0.245404	2.1163	0	0.00569613	0.993
GO_NEUROTRANSMITTER_UPTAKE	45	0.26845	2.11257	0	0.00581421	0.993
GO_PROTEIN_O_LINKED_GLYCOSYLATION	99	0.178193	2.11153	0.004158	0.00585164	0.993
GO_SECOND_MESSENGER_MEDIATED_SIGNALING	405	0.0915279	2.11152	0.00194932	0.00584827	0.993
GO_DENDRITE_EXTENSION	31	0.31238	2.10761	0.00185529	0.00599532	0.994
GO_DNA_GEOMETRIC_CHANGE	105	0.178937	2.1069	0.00408163	0.00601243	0.994
GO_POSITIVE_REGULATION_OF_CALCIUM_ION_TRANSMEMBRANE_TRANSPORT	65	0.226555	2.1068	0.00826446	0.00601123	0.994
GO_MODIFICATION_OF_MORPHOLOGY_OR_PHYSIOLOGY_OF_OTHER_ORGANISM_INVOLVED_IN_SYMBIOTIC_INTERACTION	99	0.179343	2.10202	0.00792079	0.00619083	0.996
GO_CHROMATIN_DISASSEMBLY	18	0.402964	2.0999	0.00200401	0.00626831	0.996
GO_QUINONE_METABOLIC_PROCESS	24	0.355089	2.09947	0.0019305	0.00627812	0.996
GO_POSITIVE_REGULATION_OF_MYELOID_LEUKOCYTE_CYTOKINE_PRODUCTION_INVOLVED_IN_IMMUNE_RESPONSE	17	0.422302	2.09615	0	0.00643426	0.996
GO_CENTRAL_NERVOUS_SYSTEM_NEURON_DIFFERENTIATION	179	0.133786	2.09568	0.004	0.00644961	0.996
GO_RESPONSE_TO_NUTRIENT	209	0.124928	2.09481	0.0063425	0.00648065	0.996
GO_REGULATION_OF_NEUROTRANSMITTER_UPTAKE	19	0.405705	2.09419	0.0038835	0.00649709	0.996
GO_POSITIVE_REGULATION_OF_CYTOKINE_PRODUCTION	406	0.0900988	2.09182	0.00598802	0.00661896	0.996
GO_REGULATION_OF_HORMONE_SECRETION	247	0.112287	2.09135	0	0.00662861	0.996
GO_POSITIVE_REGULATION_OF_CELL_CYCLE_PROCESS	269	0.112581	2.09122	0.00196078	0.00663372	0.996
GO_PLASMA_MEMBRANE_ORGANIZATION	99	0.176262	2.08642	0	0.00681703	0.997
GO_RESPONSE_TO_EPIDERMAL_GROWTH_FACTOR	47	0.256602	2.08629	0.00399202	0.00681299	0.997
GO_NUCLEAR_BODY_ORGANIZATION	16	0.425145	2.08516	0.00201613	0.00685699	0.997
GO_TOLL_LIKE_RECEPTOR_9_SIGNALING_PATHWAY	21	0.370318	2.08465	0.00389105	0.00687756	0.997
GO_ATTACHMENT_OF_SPINDLE_MICROTUBULES_TO_KINETOCHORE	28	0.330166	2.08424	0.00204499	0.00689016	0.997
GO_REACTIVE_NITROGEN_SPECIES_METABOLIC_PROCESS	74	0.205499	2.08413	0.00192678	0.00689056	0.997
GO_NEGATIVE_REGULATION_OF_TELOMERE_MAINTENANCE	32	0.315635	2.08243	0.00375235	0.00695006	0.998
GO_FATTY_ACID_CATABOLIC_PROCESS	97	0.179475	2.0814	0.00196464	0.00698382	0.998
GO_ADIPOSE_TISSUE_DEVELOPMENT	38	0.279286	2.0813	0.00367647	0.00698075	0.998
GO_AORTA_DEVELOPMENT	54	0.236092	2.08025	0	0.00702772	0.998
GO_RESPONSE_TO_OSMOTIC_STRESS	77	0.202517	2.08001	0.0020284	0.00703578	0.999
GO_PROTEIN_PEPTIDYL_PROLYL_ISOMERIZATION	36	0.296581	2.07917	0.00371058	0.00705706	0.999
GO_CELL_MIGRATION_INVOLVED_IN_SPROUTING_ANGIOGENESIS	69	0.209502	2.07846	0	0.00709173	0.999
GO_DERMATAN_SULFATE_PROTEOGLYCAN_METABOLIC_PROCESS	16	0.42695	2.07751	0.00196464	0.00713168	0.999
GO_OSTEOBLAST_DIFFERENTIATION	207	0.125316	2.07735	0.0020202	0.00713519	0.999
GO_HEME_METABOLIC_PROCESS	29	0.317463	2.07663	0.004158	0.00715974	0.999
GO_NEGATIVE_CHEMOTAXIS	44	0.265248	2.07574	0.00584795	0.00719305	0.999
GO_PEROXISOMAL_MEMBRANE_TRANSPORT	18	0.399195	2.07552	0.00381679	0.00719542	0.999
GO_PURINE_NUCLEOSIDE_MONOPHOSPHATE_BIOSYNTHETIC_PROCESS	17	0.405358	2.07192	0.00199601	0.00736995	0.999
GO_POSITIVE_REGULATION_OF_ERK1_AND_ERK2_CASCADE	185	0.133879	2.07136	0.00616016	0.00739427	0.999
GO_CEREBRAL_CORTEX_RADIALLY_ORIENTED_CELL_MIGRATION	28	0.328284	2.07135	0.0019084	0.00738986	0.999
GO_CELLULAR_RESPONSE_TO_GAMMA_RADIATION	27	0.326359	2.06974	0.00408163	0.00746482	0.999
GO_PROTEIN_INSERTION_INTO_MITOCHONDRIAL_MEMBRANE_INVOLVED_IN_APOPTOTIC_SIGNALING_PATHWAY	26	0.337832	2.0696	0.0019802	0.00746701	0.999
GO_MAINTENANCE_OF_SYNAPSE_STRUCTURE	15	0.435807	2.06957	0.00399202	0.00746255	0.999
GO_PROTEIN_METHYLATION	158	0.139037	2.06902	0.0038835	0.00747909	0.999
GO_POSITIVE_REGULATION_OF_CARBOHYDRATE_METABOLIC_PROCESS	75	0.203008	2.06728	0	0.00755027	0.999
GO_NEGATIVE_REGULATION_OF_ERBB_SIGNALING_PATHWAY	49	0.245746	2.06678	0.00192678	0.00757332	0.999
GO_REGULATION_OF_NUCLEOTIDE_METABOLIC_PROCESS	108	0.168981	2.06664	0	0.00757424	0.999
GO_PROTEIN_K63_LINKED_DEUBIQUITINATION	29	0.318385	2.06294	0.00389105	0.00777249	0.999
GO_RNA_5_END_PROCESSING	19	0.399792	2.06261	0.0019084	0.00778428	0.999
GO_REGULATION_OF_PEPTIDE_SECRETION	446	0.084764	2.06135	0.00767754	0.00783342	0.999
GO_SNRNA_PROCESSING	22	0.368516	2.06023	0.00403226	0.0078987	0.999
GO_PSEUDOURIDINE_SYNTHESIS	17	0.42269	2.05943	0.00398406	0.00792231	0.999
GO_MAINTENANCE_OF_PROTEIN_LOCALIZATION_IN_ORGANELLE	37	0.283714	2.05862	0.002079	0.00794059	0.999
GO_CHROMATIN_ASSEMBLY	81	0.195382	2.05856	0	0.00793795	0.999
GO_REGULATION_OF_NECROTIC_CELL_DEATH	24	0.347606	2.05605	0.00401606	0.00805526	0.999
GO_POSITIVE_REGULATION_OF_SODIUM_ION_TRANSPORT	34	0.29743	2.05552	0.0019305	0.00807642	0.999
GO_POSTSYNAPTIC_MODULATION_OF_CHEMICAL_SYNAPTIC_TRANSMISSION	15	0.436465	2.05517	0	0.0080836	0.999
GO_REGULATION_OF_CELLULAR_RESPIRATION	29	0.316416	2.0545	0.00194553	0.00811028	0.999
GO_POSITIVE_REGULATION_OF_PEPTIDE_HORMONE_SECRETION	91	0.181186	2.05412	0.00392927	0.00812812	0.999
GO_POSITIVE_REGULATION_OF_CELLULAR_CARBOHYDRATE_METABOLIC_PROCESS	55	0.231316	2.05373	0.00379507	0.00814813	0.999
GO_POLY_A_PLUS_MRNA_EXPORT_FROM_NUCLEUS	16	0.41593	2.05361	0.00392927	0.00814976	0.999
GO_PHOSPHATIDYLINOSITOL_DEPHOSPHORYLATION	22	0.360394	2.05235	0.00860215	0.00819806	0.999
GO_OLIGOSACCHARIDE_METABOLIC_PROCESS	46	0.26084	2.05224	0.00414938	0.00819749	0.999
GO_AMMONIUM_ION_METABOLIC_PROCESS	188	0.129363	2.05193	0.0019802	0.00821109	0.999
GO_REGULATION_OF_PEPTIDYL_THREONINE_PHOSPHORYLATION	43	0.258465	2.05077	0.00824742	0.00824862	0.999
GO_RIBOSOMAL_LARGE_SUBUNIT_ASSEMBLY	26	0.338808	2.04862	0.00406504	0.00834527	0.999
GO_NOTCH_SIGNALING_PATHWAY	178	0.134184	2.04815	0.00202429	0.0083587	0.999
GO_POSITIVE_REGULATION_OF_OSTEOBLAST_DIFFERENTIATION	55	0.229062	2.04795	0	0.00836439	0.999
GO_REGULATION_OF_HEMOPOIESIS	418	0.0858005	2.04729	0.0039604	0.008406	0.999
GO_CELLULAR_AMINO_ACID_BIOSYNTHETIC_PROCESS	77	0.200093	2.0466	0.002	0.00843549	0.999
GO_REGULATION_OF_CELLULAR_CARBOHYDRATE_METABOLIC_PROCESS	131	0.153921	2.04508	0.00623701	0.00850479	0.999
GO_STEROL_METABOLIC_PROCESS	144	0.143912	2.04508	0.00413223	0.00849859	0.999
GO_G_PROTEIN_COUPLED_ACETYLCHOLINE_RECEPTOR_SIGNALING_PATHWAY	19	0.39266	2.04506	0.00204082	0.00849453	0.999
GO_MULTICELLULAR_ORGANISMAL_RESPONSE_TO_STRESS	74	0.200245	2.04408	0.00204082	0.00853568	0.999
GO_NEGATIVE_REGULATION_OF_AXON_EXTENSION	41	0.268268	2.04143	0	0.00870348	0.999
GO_NEGATIVE_REGULATION_OF_RESPONSE_TO_DNA_DAMAGE_STIMULUS	70	0.20554	2.04119	0.00787402	0.00870892	0.999
GO_CHROMOSOME_SEPARATION	83	0.194922	2.04084	0	0.00872295	0.999
GO_REGULATION_OF_TYPE_I_INTERFERON_MEDIATED_SIGNALING_PATHWAY	34	0.299019	2.04042	0.00622407	0.00874016	0.999
GO_MEMBRANE_LIPID_CATABOLIC_PROCESS	32	0.306242	2.04024	0.00560748	0.00874246	0.999
GO_POSITIVE_REGULATION_OF_CALCIUM_ION_TRANSMEMBRANE_TRANSPORTER_ACTIVITY	37	0.290409	2.03785	0.00197628	0.00885613	0.999
GO_ESTABLISHMENT_OF_PROTEIN_LOCALIZATION_TO_POSTSYNAPTIC_MEMBRANE	20	0.379919	2.0367	0.004158	0.00890666	0.999
GO_REGULATION_OF_MITOCHONDRIAL_FISSION	21	0.369331	2.0362	0.00790514	0.00892262	0.999
GO_NUCLEOTIDE_EXCISION_REPAIR_PREINCISION_COMPLEX_ASSEMBLY	29	0.31992	2.03577	0	0.00893213	0.999
GO_REGULATION_OF_PROTEIN_LOCALIZATION_TO_CELL_SURFACE	38	0.279038	2.03575	0.0101215	0.00892568	0.999
GO_LIPOPROTEIN_CATABOLIC_PROCESS	15	0.431366	2.0353	0	0.00894596	0.999
GO_CELLULAR_RESPONSE_TO_VIRUS	42	0.267162	2.03471	0.00571429	0.00896732	0.999
GO_PEPTIDYL_CYSTEINE_MODIFICATION	46	0.251801	2.0333	0.004158	0.00901819	0.999
GO_REGULATION_OF_INTRACELLULAR_STEROID_HORMONE_RECEPTOR_SIGNALING_PATHWAY	71	0.203143	2.03079	0.00189753	0.00913949	0.999
GO_GLUTAMINE_METABOLIC_PROCESS	20	0.380928	2.0304	0.00419287	0.0091542	0.999
GO_REGULATION_OF_CENTROSOME_CYCLE	54	0.233816	2.02907	0.0059761	0.00923595	0.999
GO_NEGATIVE_REGULATION_OF_RNA_CATABOLIC_PROCESS	55	0.23171	2.02866	0.00390625	0.00926023	0.999
GO_POSITIVE_REGULATION_OF_REACTIVE_OXYGEN_SPECIES_BIOSYNTHETIC_PROCESS	48	0.249271	2.02852	0.00400802	0.00925887	0.999
GO_UBIQUITIN_DEPENDENT_PROTEIN_CATABOLIC_PROCESS_VIA_THE_MULTIVESICULAR_BODY_SORTING_PATHWAY	22	0.361258	2.02713	0.00628931	0.00933799	0.999
GO_POSTSYNAPTIC_SPECIALIZATION_ASSEMBLY	21	0.363244	2.02519	0.00582524	0.00942884	0.999
GO_REGULATION_OF_PEPTIDYL_TYROSINE_PHOSPHORYLATION	237	0.115953	2.025	0.00413223	0.00943276	0.999
GO_PROTEIN_LOCALIZATION_TO_CHROMOSOME_CENTROMERIC_REGION	20	0.383411	2.0244	0.00407332	0.00945881	0.999
GO_INTRACELLULAR_LIPID_TRANSPORT	40	0.263399	2.0234	0.00210526	0.00951324	0.999
GO_NEUROTRANSMITTER_RECEPTOR_INTERNALIZATION	25	0.339639	2.02337	0.00589391	0.0095075	0.999
GO_SEMAPHORIN_PLEXIN_SIGNALING_PATHWAY	38	0.281952	2.02317	0.0117188	0.00951142	0.999
GO_POSITIVE_REGULATION_OF_OLIGODENDROCYTE_DIFFERENTIATION	20	0.376626	2.02212	0.00595238	0.00957126	0.999
GO_REGULATION_OF_PROTEIN_EXIT_FROM_ENDOPLASMIC_RETICULUM	26	0.33969	2.02194	0	0.00957184	0.999
GO_POSITIVE_REGULATION_OF_PROTEIN_LOCALIZATION_TO_CELL_PERIPHERY	61	0.215893	2.02152	0.00386847	0.00959568	0.999
GO_CELLULAR_RESPONSE_TO_ANTIBIOTIC	131	0.155295	2.02146	0.00422833	0.00959517	0.999
GO_GOLGI_TO_ENDOSOME_TRANSPORT	15	0.425842	2.02076	0.00381679	0.00963382	0.999
GO_PROTEIN_PROCESSING	192	0.127954	2.01984	0.00978474	0.00968678	0.999
GO_POSITIVE_REGULATION_OF_PROTEIN_AUTOPHOSPHORYLATION	24	0.348148	2.01916	0.00584795	0.0097126	0.999
GO_CELLULAR_RESPONSE_TO_AMYLOID_BETA	39	0.278378	2.01786	0.00639659	0.00979823	0.999
GO_INTRACELLULAR_ESTROGEN_RECEPTOR_SIGNALING_PATHWAY	49	0.24466	2.01708	0.00396825	0.00983534	0.999
GO_POSITIVE_REGULATION_OF_NF_KAPPAB_TRANSCRIPTION_FACTOR_ACTIVITY	143	0.145019	2.01705	0.00200401	0.00982837	0.999
GO_CALCIUM_ION_REGULATED_EXOCYTOSIS	64	0.215319	2.01677	0	0.00983509	0.999
GO_POSITIVE_REGULATION_OF_INSULIN_SECRETION_INVOLVED_IN_CELLULAR_RESPONSE_TO_GLUCOSE_STIMULUS	30	0.303843	2.01632	0.00776699	0.00985624	0.999
GO_REGULATION_OF_PROTEIN_MATURATION	59	0.226951	2.01612	0.00395257	0.00985966	0.999
GO_NUCLEOTIDE_EXCISION_REPAIR_DNA_DUPLEX_UNWINDING	22	0.368457	2.01558	0.00207469	0.0098882	0.999
GO_MIRNA_METABOLIC_PROCESS	26	0.337181	2.0155	0.00576923	0.0098844	0.999
GO_CELLULAR_RESPONSE_TO_LIPOPROTEIN_PARTICLE_STIMULUS	31	0.300656	2.0147	0	0.00991927	0.999
GO_MODIFICATION_BY_SYMBIONT_OF_HOST_MORPHOLOGY_OR_PHYSIOLOGY	37	0.279854	2.0143	0.0116732	0.00993622	0.999
GO_RESPONSE_TO_PLATELET_DERIVED_GROWTH_FACTOR	19	0.39248	2.01315	0	0.0100145	0.999
GO_POLYSACCHARIDE_METABOLIC_PROCESS	100	0.169918	2.01297	0.0039604	0.0100169	0.999
GO_COPPER_ION_HOMEOSTASIS	16	0.423162	2.01283	0.00992064	0.0100171	0.999
GO_TRNA_WOBBLE_BASE_MODIFICATION	18	0.395554	2.01283	0.006	0.0100101	0.999
GO_CELLULAR_RESPONSE_TO_EXOGENOUS_DSRNA	15	0.424055	2.01162	0.00392157	0.0100853	0.999
GO_NEGATIVE_REGULATION_OF_DEFENSE_RESPONSE	199	0.121425	2.01149	0.00775194	0.0100877	0.999
GO_ENDOTHELIUM_DEVELOPMENT	125	0.151799	2.01137	0.00428265	0.010091	0.999
GO_REGULATION_OF_SYNAPTIC_TRANSMISSION_GABAERGIC	30	0.314564	2.01095	0.00390625	0.010115	0.999
GO_POSITIVE_REGULATION_OF_MITOCHONDRIAL_TRANSLATION	16	0.407526	2.00882	0.00582524	0.0102461	0.999
GO_NEGATIVE_REGULATION_OF_DENDRITE_MORPHOGENESIS	16	0.416635	2.00799	0.00214133	0.0102906	0.999
GO_CELL_AGING	99	0.17354	2.00664	0.00383877	0.010358	0.999
GO_CHEMICAL_SYNAPTIC_TRANSMISSION_POSTSYNAPTIC	106	0.162565	2.00615	0.00195312	0.0103767	0.999
GO_CYCLIC_NUCLEOTIDE_MEDIATED_SIGNALING	194	0.123892	2.00583	0.00192678	0.0103882	0.999
GO_POSITIVE_REGULATION_OF_CALCIUM_ION_TRANSPORT	115	0.162504	2.0056	0.010352	0.0103995	0.999
GO_RESPONSE_TO_COLD	46	0.252529	2.00552	0.00601202	0.0103964	0.999
GO_REGULATION_OF_TRANSCRIPTION_ELONGATION_FROM_RNA_POLYMERASE_II_PROMOTER	27	0.318563	2.00432	0.003861	0.0104426	0.999
GO_REGULATION_OF_ESTABLISHMENT_OR_MAINTENANCE_OF_CELL_POLARITY	23	0.347306	2.0042	0.00994036	0.0104416	0.999
GO_CELLULAR_PROTEIN_CONTAINING_COMPLEX_LOCALIZATION	21	0.369867	2.003	0	0.0105253	0.999
GO_VASODILATION	30	0.302357	2.00258	0.00394477	0.0105491	0.999
GO_POSITIVE_REGULATION_OF_SODIUM_ION_TRANSMEMBRANE_TRANSPORT	21	0.364533	2.00074	0.00824742	0.0106582	0.999
GO_AMINOGLYCAN_METABOLIC_PROCESS	164	0.134304	1.99964	0.00631579	0.0107277	0.999
GO_ATP_BIOSYNTHETIC_PROCESS	28	0.321546	1.99895	0.00408163	0.0107726	0.999
GO_VIRAL_RNA_GENOME_REPLICATION	23	0.349879	1.99894	0.00389105	0.0107661	0.999
GO_PEROXISOME_ORGANIZATION	77	0.197109	1.99836	0.0040568	0.0107894	0.999
GO_POLYSACCHARIDE_BIOSYNTHETIC_PROCESS	68	0.203866	1.99819	0.00387597	0.0107902	0.999
GO_IRON_SULFUR_CLUSTER_ASSEMBLY	18	0.394915	1.99815	0.0039604	0.0107858	0.999
GO_ORGANIC_HYDROXY_COMPOUND_METABOLIC_PROCESS	485	0.081664	1.99763	0.0118343	0.010808	0.999
GO_REGULATION_OF_STEROID_BIOSYNTHETIC_PROCESS	84	0.180908	1.99751	0.00200401	0.0108098	1
GO_REGULATION_OF_FATTY_ACID_METABOLIC_PROCESS	85	0.183394	1.99714	0.00604839	0.0108299	1
GO_HISTONE_H2A_UBIQUITINATION	24	0.334942	1.9971	0.00601202	0.0108255	1
GO_CELLULAR_RESPONSE_TO_CADMIUM_ION	25	0.338732	1.99453	0.00598802	0.0109877	1
GO_MIDBRAIN_DEVELOPMENT	82	0.186978	1.99446	0.0120482	0.0109863	1
GO_COFACTOR_CATABOLIC_PROCESS	47	0.247815	1.9936	0.00202429	0.0110441	1
GO_NEGATIVE_REGULATION_OF_AMINE_TRANSPORT	24	0.334846	1.99331	0.00198413	0.011061	1
GO_PIGMENT_CELL_DIFFERENTIATION	33	0.291583	1.99311	0.00819672	0.0110645	1
GO_REGULATION_OF_CALCIUM_ION_DEPENDENT_EXOCYTOSIS	42	0.257596	1.99305	0.00576923	0.01106	1
GO_ANION_TRANSMEMBRANE_TRANSPORT	278	0.103806	1.99279	0.00380228	0.0110686	1
GO_MUSCLE_CELL_PROLIFERATION	193	0.124004	1.9904	0.00785855	0.0112225	1
GO_NEGATIVE_REGULATION_OF_ESTABLISHMENT_OF_PROTEIN_LOCALIZATION	169	0.133918	1.99035	0.00631579	0.0112159	1
GO_REGULATION_OF_TRANSLATIONAL_ELONGATION	17	0.402456	1.98964	0.00200803	0.01126	1
GO_AMINOGLYCAN_BIOSYNTHETIC_PROCESS	112	0.161347	1.9889	0.00196078	0.011297	1
GO_POSITIVE_REGULATION_OF_PHOSPHOPROTEIN_PHOSPHATASE_ACTIVITY	20	0.376764	1.98875	0.00202429	0.0113004	1
GO_REGULATION_OF_SMOOTHENED_SIGNALING_PATHWAY	79	0.188343	1.9876	0.00595238	0.0113504	1
GO_LEUKOCYTE_ACTIVATION_INVOLVED_IN_INFLAMMATORY_RESPONSE	45	0.249455	1.98615	0.00959693	0.011448	1
GO_REGULATION_OF_SODIUM_ION_TRANSMEMBRANE_TRANSPORT	61	0.216523	1.98594	0.011583	0.0114493	1
GO_ENERGY_RESERVE_METABOLIC_PROCESS	79	0.194663	1.98549	0.00614754	0.0114758	1
GO_POSITIVE_REGULATION_OF_JNK_CASCADE	126	0.156572	1.98273	0	0.0116682	1
GO_MEMBRANE_INVAGINATION	66	0.208028	1.9826	0.00788955	0.0116723	1
GO_RESPONSE_TO_KETONE	187	0.124583	1.98161	0.00396825	0.0117319	1
GO_PYRIMIDINE_NUCLEOSIDE_TRIPHOSPHATE_BIOSYNTHETIC_PROCESS	15	0.429227	1.98155	0.00591716	0.0117249	1
GO_POSITIVE_REGULATION_OF_PHOSPHATASE_ACTIVITY	33	0.291936	1.97992	0.0122699	0.0118219	1
GO_FATTY_ACID_HOMEOSTASIS	15	0.431817	1.97715	0.00215054	0.0120194	1
GO_REGULATION_OF_ATP_BIOSYNTHETIC_PROCESS	16	0.40916	1.97671	0.00621118	0.0120515	1
GO_CELLULAR_RESPONSE_TO_REACTIVE_OXYGEN_SPECIES	151	0.139955	1.97612	0.0040404	0.0120947	1
GO_NITRIC_OXIDE_SYNTHASE_BIOSYNTHETIC_PROCESS	18	0.382592	1.97547	0.00209205	0.0121287	1
GO_REGULATION_OF_NOTCH_SIGNALING_PATHWAY	94	0.173622	1.97452	0	0.0121816	1
GO_NEGATIVE_REGULATION_OF_PROTEIN_LOCALIZATION_TO_MEMBRANE	28	0.308085	1.97301	0.00575816	0.0122855	1
GO_REGULATION_OF_DNA_TEMPLATED_TRANSCRIPTION_INITIATION	35	0.284434	1.9729	0.00199601	0.0122822	1
GO_REGULATION_OF_CHEMOTAXIS	199	0.11844	1.97246	0.0137525	0.0122969	1
GO_POSITIVE_REGULATION_OF_CELL_MATRIX_ADHESION	49	0.241904	1.97214	0.00862069	0.0123096	1
GO_SMOOTHENED_SIGNALING_PATHWAY	131	0.149435	1.9712	0.012848	0.0123823	1
GO_REGULATION_OF_CATECHOLAMINE_METABOLIC_PROCESS	18	0.384488	1.97113	0.00384615	0.0123789	1
GO_REGULATION_OF_CELLULAR_RESPONSE_TO_TRANSFORMING_GROWTH_FACTOR_BETA_STIMULUS	110	0.15989	1.96956	0.0159363	0.0124896	1
GO_REGULATION_OF_CELLULAR_RESPONSE_TO_INSULIN_STIMULUS	66	0.200531	1.96899	0.00576923	0.0125252	1
GO_NEGATIVE_REGULATION_OF_TYPE_I_INTERFERON_PRODUCTION	41	0.26001	1.96802	0	0.0125786	1
GO_REGULATION_OF_MRNA_POLYADENYLATION	15	0.42864	1.96579	0.0104822	0.0127596	1
GO_REGULATION_OF_EXTRINSIC_APOPTOTIC_SIGNALING_PATHWAY_VIA_DEATH_DOMAIN_RECEPTORS	54	0.224008	1.96338	0.0078125	0.0129269	1
GO_DICARBOXYLIC_ACID_TRANSPORT	93	0.176448	1.96289	0.00773694	0.012948	1
GO_SPROUTING_ANGIOGENESIS	138	0.143151	1.96278	0.00399202	0.0129483	1
GO_POSITIVE_REGULATION_OF_AMYLOID_PRECURSOR_PROTEIN_CATABOLIC_PROCESS	20	0.369268	1.96246	0.00753296	0.0129645	1
GO_POSITIVE_REGULATION_OF_CYSTEINE_TYPE_ENDOPEPTIDASE_ACTIVITY	133	0.145787	1.96236	0.0103093	0.0129638	1
GO_MITOTIC_SISTER_CHROMATID_COHESION	19	0.372393	1.96206	0.00413223	0.0129818	1
GO_PLATELET_AGGREGATION	59	0.214809	1.96165	0.01002	0.0130048	1
GO_POSITIVE_REGULATION_OF_ENDOTHELIAL_CELL_MIGRATION	106	0.166307	1.95895	0.0083682	0.0132155	1
GO_REGULATION_OF_EXCITATORY_SYNAPSE_ASSEMBLY	15	0.420327	1.95854	0.00801603	0.0132336	1
GO_REGULATION_OF_GLIAL_CELL_DIFFERENTIATION	66	0.203967	1.95835	0	0.0132416	1
GO_NEGATIVE_REGULATION_OF_RELEASE_OF_CYTOCHROME_C_FROM_MITOCHONDRIA	18	0.379719	1.95793	0.0122951	0.0132625	1
GO_NEGATIVE_REGULATION_OF_CYSTEINE_TYPE_ENDOPEPTIDASE_ACTIVITY	84	0.186106	1.95608	0.0101626	0.0133693	1
GO_CALCIUM_ION_TRANSMEMBRANE_IMPORT_INTO_CYTOSOL	135	0.144506	1.95537	0.0136719	0.0134216	1
GO_NEURAL_PRECURSOR_CELL_PROLIFERATION	140	0.142073	1.95261	0.0100402	0.0136449	1
GO_CELLULAR_RESPONSE_TO_CALCIUM_ION	80	0.183659	1.95194	0.00610998	0.0136773	1
GO_CELLULAR_RESPONSE_TO_KETONE	89	0.173258	1.95014	0.00603622	0.0137975	1
GO_VACUOLAR_ACIDIFICATION	21	0.357433	1.94959	0.0180361	0.0138278	1
GO_EXIT_FROM_MITOSIS	29	0.30662	1.9495	0.0114943	0.0138244	1
GO_PYRIMIDINE_NUCLEOSIDE_TRIPHOSPHATE_METABOLIC_PROCESS	18	0.384804	1.94877	0.00400802	0.0138755	1
GO_EXPLORATION_BEHAVIOR	23	0.333852	1.9485	0.0145228	0.0138831	1
GO_NEGATIVE_REGULATION_OF_CELLULAR_RESPONSE_TO_INSULIN_STIMULUS	32	0.289714	1.94814	0.00982318	0.0139004	1
GO_REGULATION_OF_CYTOPLASMIC_TRANSLATION	26	0.323103	1.9472	0.00385356	0.0139691	1
GO_POSITIVE_REGULATION_OF_DNA_REPAIR	58	0.215242	1.94565	0.00606061	0.0140764	1
GO_ORGANIC_ACID_BIOSYNTHETIC_PROCESS	313	0.0965648	1.9454	0.00792079	0.0140838	1
GO_REGULATION_OF_CELL_CYCLE_ARREST	101	0.168148	1.94514	0.00598802	0.0140941	1
GO_ORGANIC_HYDROXY_COMPOUND_BIOSYNTHETIC_PROCESS	247	0.105379	1.94505	0.00785855	0.0140936	1
GO_INCLUSION_BODY_ASSEMBLY	22	0.343221	1.94379	0.00410678	0.0141801	1
GO_REGULATION_OF_DNA_BINDING_TRANSCRIPTION_FACTOR_ACTIVITY	407	0.0829432	1.94362	0.00819672	0.0141815	1
GO_RIBOSOMAL_SMALL_SUBUNIT_ASSEMBLY	16	0.406804	1.9434	0.00421053	0.0141936	1
GO_UBIQUINONE_METABOLIC_PROCESS	18	0.368893	1.94288	0.00986193	0.0142292	1
GO_DNA_REPLICATION	249	0.104621	1.94288	0.012605	0.0142198	1
GO_NEGATIVE_REGULATION_OF_DEVELOPMENTAL_GROWTH	99	0.168337	1.94115	0.0136187	0.014356	1
GO_STARTLE_RESPONSE	26	0.322209	1.93915	0.00763359	0.0145535	1
GO_HISTONE_DEUBIQUITINATION	20	0.353424	1.93911	0.0139165	0.0145439	1
GO_CELLULAR_PIGMENTATION	49	0.232409	1.93882	0.00396825	0.0145626	1
GO_CELL_MATRIX_ADHESION	216	0.11239	1.93756	0.0122951	0.0146708	1
GO_PROTEIN_IMPORT_INTO_MITOCHONDRIAL_MATRIX	18	0.385135	1.93741	0.0165631	0.0146739	1
GO_COENZYME_A_METABOLIC_PROCESS	15	0.412104	1.93711	0.00207469	0.0146886	1
GO_MYELOID_CELL_APOPTOTIC_PROCESS	31	0.29149	1.93578	0.00843882	0.0147881	1
GO_MITOCHONDRIAL_RESPIRATORY_CHAIN_COMPLEX_IV_ASSEMBLY	18	0.373746	1.93502	0.00986193	0.0148202	1
GO_REGULATION_OF_VASCULAR_SMOOTH_MUSCLE_CELL_PROLIFERATION	61	0.206273	1.93235	0.0083682	0.0150377	1
GO_REGULATION_OF_PHOSPHOLIPID_METABOLIC_PROCESS	87	0.179051	1.93094	0.0100806	0.0151786	1
GO_NUCLEOBASE_CONTAINING_SMALL_MOLECULE_CATABOLIC_PROCESS	37	0.266235	1.92918	0.0132325	0.0153286	1
GO_REGULATION_OF_ENDOPLASMIC_RETICULUM_UNFOLDED_PROTEIN_RESPONSE	25	0.325837	1.92915	0.0040404	0.0153195	1
GO_POSITIVE_REGULATION_OF_CELL_CYCLE_ARREST	77	0.184096	1.92854	0.00990099	0.0153703	1
GO_THYMUS_DEVELOPMENT	47	0.23416	1.9279	0.00773694	0.0154144	1
GO_CAMP_METABOLIC_PROCESS	21	0.356079	1.9259	0.0121457	0.0155941	1
GO_EXCITATORY_SYNAPSE_ASSEMBLY	26	0.322089	1.92514	0.011194	0.0156332	1
GO_OSSIFICATION	376	0.0868823	1.92458	0.00364964	0.0156656	1
GO_NEGATIVE_REGULATION_OF_OXIDATIVE_STRESS_INDUCED_NEURON_DEATH	18	0.38278	1.923	0.00610998	0.0157818	1
GO_REGULATION_OF_RESPONSE_TO_WOUNDING	170	0.128213	1.92233	0.00785855	0.0158302	1
GO_REGULATION_OF_CELLULAR_RESPONSE_TO_DRUG	36	0.2624	1.92068	0.00583658	0.0159588	1
GO_TOXIN_TRANSPORT	38	0.267472	1.92065	0.02079	0.0159494	1
GO_NEGATIVE_REGULATION_OF_PROTEIN_LOCALIZATION_TO_CELL_PERIPHERY	23	0.336516	1.91849	0.00992064	0.0161401	1
GO_TRNA_METHYLATION	35	0.274366	1.91813	0.00572519	0.016166	1
GO_ASTROCYTE_DIFFERENTIATION	77	0.185421	1.91563	0.00817996	0.0164111	1
GO_POSTREPLICATION_REPAIR	49	0.228953	1.91523	0.0121951	0.0164293	1
GO_POSITIVE_REGULATION_OF_OSSIFICATION	80	0.17914	1.91436	0.0043384	0.0164887	1
GO_HYDROGEN_PEROXIDE_METABOLIC_PROCESS	44	0.23722	1.91414	0.00573614	0.0165011	1
GO_INNERVATION	26	0.313378	1.91206	0.0063425	0.0166975	1
GO_NEGATIVE_REGULATION_OF_RESPONSE_TO_DRUG	30	0.292594	1.91013	0.00203666	0.0168666	1
GO_REGULATION_OF_PHOSPHOLIPID_BIOSYNTHETIC_PROCESS	18	0.368984	1.90996	0.0144033	0.01687	1
GO_NEGATIVE_REGULATION_OF_VIRAL_LIFE_CYCLE	67	0.197221	1.90929	0.0119284	0.0169298	1
GO_REGULATION_OF_MUSCLE_HYPERTROPHY	62	0.202424	1.90766	0.0104822	0.0170843	1
GO_NEGATIVE_REGULATION_OF_PEPTIDYL_THREONINE_PHOSPHORYLATION	19	0.363411	1.90742	0.00862069	0.0170962	1
GO_CYTOPLASMIC_SEQUESTERING_OF_PROTEIN	24	0.322887	1.90354	0.0162602	0.0174433	1
GO_ESTABLISHMENT_OF_SPINDLE_ORIENTATION	36	0.269221	1.90247	0.00626305	0.0175465	1
GO_NUCLEOTIDE_EXCISION_REPAIR_DNA_INCISION_3_TO_LESION	22	0.351193	1.90236	0.00823045	0.0175476	1
GO_RNA_STABILIZATION	45	0.241727	1.90116	0.00811359	0.017667	1
GO_NEGATIVE_REGULATION_OF_INTRACELLULAR_TRANSPORT	58	0.209204	1.90033	0.00938086	0.0177481	1
GO_RESPONSE_TO_COCAINE	46	0.236203	1.89975	0.00595238	0.0177851	1
GO_MUSCLE_CELL_APOPTOTIC_PROCESS	78	0.181517	1.89936	0.0118577	0.0178212	1
GO_SIGNAL_TRANSDUCTION_INVOLVED_IN_CELL_CYCLE_CHECKPOINT	68	0.193426	1.89908	0.00612245	0.0178421	1
GO_RESPONSE_TO_EPINEPHRINE	16	0.396613	1.89814	0.00618557	0.0179095	1
GO_CELLULAR_COMPONENT_MAINTENANCE	51	0.226017	1.89741	0.00854701	0.0179627	1
GO_PLASMA_MEMBRANE_TUBULATION	17	0.372978	1.89652	0.0120482	0.018029	1
GO_NEGATIVE_REGULATION_OF_SYNAPSE_ORGANIZATION	23	0.33511	1.8938	0.0039604	0.0182879	1
GO_RESPONSE_TO_ARSENIC_CONTAINING_SUBSTANCE	33	0.267767	1.89234	0.00772201	0.0184266	1
GO_ACETYL_COA_BIOSYNTHETIC_PROCESS_FROM_PYRUVATE	16	0.389897	1.89102	0.0128755	0.0185628	1
GO_ARF_PROTEIN_SIGNAL_TRANSDUCTION	19	0.357001	1.89099	0.00803213	0.0185528	1
GO_POSITIVE_REGULATION_OF_BLOOD_VESSEL_ENDOTHELIAL_CELL_MIGRATION	63	0.201803	1.88915	0.010142	0.0187435	1
GO_LEUKOCYTE_HOMEOSTASIS	81	0.178882	1.88891	0.0149533	0.0187581	1
GO_RESPONSE_TO_AMINE	46	0.235485	1.88882	0.0167015	0.0187536	1
GO_NUCLEOBASE_CONTAINING_SMALL_MOLECULE_INTERCONVERSION	26	0.303651	1.88868	0.0119284	0.0187539	1
GO_PROTEIN_DNA_COMPLEX_DISASSEMBLY	18	0.376604	1.88857	0.0139165	0.0187532	1
GO_NEGATIVE_REGULATION_OF_ORGANELLE_ASSEMBLY	36	0.263401	1.88768	0.014	0.0188243	1
GO_CELLULAR_RESPONSE_TO_VASCULAR_ENDOTHELIAL_GROWTH_FACTOR_STIMULUS	58	0.214356	1.88765	0.0120968	0.018817	1
GO_DENDRITIC_SPINE_MAINTENANCE	18	0.36957	1.88731	0.0139442	0.0188295	1
GO_REGULATION_OF_ER_TO_GOLGI_VESICLE_MEDIATED_TRANSPORT	16	0.385764	1.8869	0.00813008	0.0188601	1
GO_POSITIVE_REGULATION_OF_CILIUM_ASSEMBLY	21	0.336745	1.8848	0.015625	0.0190857	1
GO_MODULATION_BY_VIRUS_OF_HOST_MORPHOLOGY_OR_PHYSIOLOGY	29	0.292633	1.88462	0.00617284	0.0190941	1
GO_NEGATIVE_REGULATION_OF_ERK1_AND_ERK2_CASCADE	66	0.198981	1.88423	0.002079	0.0191336	1
GO_CELL_CELL_JUNCTION_ASSEMBLY	125	0.145506	1.88357	0.0121951	0.019192	1
GO_FATTY_ACID_BIOSYNTHETIC_PROCESS	135	0.136458	1.88353	0.0125523	0.0191846	1
GO_NEGATIVE_REGULATION_OF_CELL_JUNCTION_ASSEMBLY	24	0.315071	1.8834	0.0142857	0.0191855	1
GO_NEGATIVE_REGULATION_OF_JNK_CASCADE	34	0.273413	1.88286	0.00970874	0.0192354	1
GO_DNA_REPLICATION_INDEPENDENT_NUCLEOSOME_ORGANIZATION	35	0.269873	1.88282	0.00801603	0.0192278	1
GO_RESPONSE_TO_INTERFERON_GAMMA	159	0.126552	1.88253	0.0140845	0.0192577	1
GO_CRISTAE_FORMATION	15	0.400758	1.88203	0.00970874	0.0193072	1
GO_REGULATION_OF_COFACTOR_METABOLIC_PROCESS	34	0.276936	1.88193	0.00566038	0.0193054	1
GO_REGULATION_OF_SPHINGOLIPID_BIOSYNTHETIC_PROCESS	17	0.379212	1.88086	0.00412371	0.0194165	1
GO_SNRNA_3_END_PROCESSING	17	0.379581	1.8776	0.0122699	0.0197404	1
GO_CARBOHYDRATE_TRANSMEMBRANE_TRANSPORT	97	0.161651	1.87164	0.00203666	0.0204305	1
GO_NEGATIVE_REGULATION_OF_STEM_CELL_DIFFERENTIATION	20	0.353907	1.87089	0.0104167	0.0204811	1
GO_ADRENERGIC_RECEPTOR_SIGNALING_PATHWAY	27	0.299176	1.86932	0.0142857	0.0206356	1
GO_NEGATIVE_REGULATION_OF_CELL_SUBSTRATE_JUNCTION_ORGANIZATION	18	0.370586	1.86904	0.0141129	0.0206544	1
GO_RESPONSE_TO_FIBROBLAST_GROWTH_FACTOR	141	0.131921	1.86895	0.021611	0.0206507	1
GO_HISTONE_H3_ACETYLATION	57	0.208763	1.86812	0.00996016	0.020741	1
GO_DNA_DAMAGE_RESPONSE_DETECTION_OF_DNA_DAMAGE	37	0.253721	1.86809	0.0102041	0.0207335	1
GO_NEGATIVE_REGULATION_OF_ENDOPLASMIC_RETICULUM_STRESS_INDUCED_INTRINSIC_APOPTOTIC_SIGNALING_PATHWAY	17	0.36932	1.86729	0.00877193	0.0208163	1
GO_POSTSYNAPTIC_NEUROTRANSMITTER_RECEPTOR_INTERNALIZATION	20	0.349571	1.86599	0.0139165	0.020974	1
GO_NEGATIVE_REGULATION_OF_PEPTIDE_HORMONE_SECRETION	39	0.250255	1.86473	0.0155945	0.0210956	1
GO_TUMOR_NECROSIS_FACTOR_SUPERFAMILY_CYTOKINE_PRODUCTION	150	0.129356	1.86406	0.0103734	0.0211574	1
GO_ORGANIC_ANION_TRANSPORT	438	0.0768607	1.86356	0.00982318	0.0212082	1
GO_LIPID_CATABOLIC_PROCESS	303	0.0903702	1.86302	0.0019802	0.0212504	1
GO_POST_EMBRYONIC_DEVELOPMENT	85	0.173725	1.86219	0.003861	0.0213295	1
GO_REGULATION_OF_PROTEIN_POLYUBIQUITINATION	22	0.334017	1.86147	0.00625	0.0214042	1
GO_REGULATION_OF_INCLUSION_BODY_ASSEMBLY	16	0.382929	1.86085	0.0162933	0.0214768	1
GO_NEGATIVE_REGULATION_OF_RECEPTOR_SIGNALING_PATHWAY_VIA_JAK_STAT	22	0.330529	1.86003	0.0078125	0.0215485	1
GO_HINDBRAIN_DEVELOPMENT	144	0.136362	1.85706	0.0118812	0.0218756	1
GO_PROTEIN_LOCALIZATION_TO_KINETOCHORE	16	0.383598	1.85686	0.011976	0.0218822	1
GO_COAGULATION	301	0.0923424	1.85622	0.0060241	0.021935	1
GO_REGULATION_OF_COLLATERAL_SPROUTING	19	0.349418	1.85556	0.0124224	0.022008	1
GO_POSITIVE_REGULATION_OF_PROTEIN_CONTAINING_COMPLEX_DISASSEMBLY	33	0.270227	1.85508	0.0101626	0.0220633	1
GO_POSITIVE_REGULATION_OF_PROTEIN_ACETYLATION	43	0.238935	1.85382	0.0181452	0.0221942	1
GO_CELLULAR_MONOVALENT_INORGANIC_CATION_HOMEOSTASIS	99	0.156861	1.85361	0.0184805	0.0222034	1
GO_CELL_RECOGNITION	133	0.136486	1.85292	0.0122449	0.0222944	1
GO_PHAGOSOME_MATURATION	41	0.244383	1.85269	0.0143149	0.0223173	1
GO_REGULATION_OF_INTRINSIC_APOPTOTIC_SIGNALING_PATHWAY_IN_RESPONSE_TO_DNA_DAMAGE	36	0.264602	1.85265	0.0235294	0.0223062	1
GO_ORGANISM_EMERGENCE_FROM_PROTECTIVE_STRUCTURE	26	0.303931	1.8516	0.0144628	0.0224189	1
GO_ZINC_ION_TRANSPORT	27	0.299156	1.84951	0.010101	0.0226627	1
GO_POSITIVE_REGULATION_OF_VASCULATURE_DEVELOPMENT	195	0.112968	1.84808	0.00811359	0.0228107	1
GO_STRESS_GRANULE_ASSEMBLY	18	0.365192	1.84786	0.00776699	0.0228242	1
GO_IONOTROPIC_GLUTAMATE_RECEPTOR_SIGNALING_PATHWAY	24	0.315364	1.84618	0.00626305	0.0230041	1
GO_LIPOPOLYSACCHARIDE_MEDIATED_SIGNALING_PATHWAY	54	0.215536	1.84516	0.0219124	0.0231206	1
GO_MYD88_INDEPENDENT_TOLL_LIKE_RECEPTOR_SIGNALING_PATHWAY	32	0.272465	1.84462	0.0206612	0.0231775	1
GO_IMPORT_ACROSS_PLASMA_MEMBRANE	117	0.143218	1.84399	0.0187891	0.0232318	1
GO_NEUROTRANSMITTER_RECEPTOR_LOCALIZATION_TO_POSTSYNAPTIC_SPECIALIZATION_MEMBRANE	21	0.332553	1.84253	0.012	0.0233845	1
GO_REGULATION_OF_MONOOXYGENASE_ACTIVITY	58	0.207004	1.84135	0.010142	0.0235235	1
GO_I_KAPPAB_PHOSPHORYLATION	18	0.365147	1.84094	0.0149533	0.0235529	1
GO_REGULATION_OF_CELL_MIGRATION_INVOLVED_IN_SPROUTING_ANGIOGENESIS	54	0.216624	1.84063	0.00199601	0.0235683	1
GO_PHOSPHATIDYLCHOLINE_BIOSYNTHETIC_PROCESS	38	0.250779	1.84055	0.0208333	0.0235612	1
GO_BLASTOCYST_DEVELOPMENT	96	0.160702	1.84028	0.0133333	0.0235831	1
GO_POSITIVE_REGULATION_OF_LAMELLIPODIUM_ORGANIZATION	28	0.289654	1.83993	0.0100604	0.0236278	1
GO_NEGATIVE_REGULATION_OF_G_PROTEIN_COUPLED_RECEPTOR_SIGNALING_PATHWAY	49	0.221875	1.83911	0.012	0.0237236	1
GO_POSITIVE_REGULATION_OF_LONG_TERM_SYNAPTIC_POTENTIATION	20	0.338796	1.83789	0.0247619	0.0238858	1
GO_NEGATIVE_REGULATION_OF_CALCIUM_MEDIATED_SIGNALING	29	0.285204	1.83768	0.016632	0.0238957	1
GO_NEGATIVE_REGULATION_OF_PROTEIN_LOCALIZATION_TO_NUCLEUS	28	0.287006	1.83696	0.0162933	0.0239853	1
GO_DIVALENT_INORGANIC_CATION_HOMEOSTASIS	472	0.0724407	1.83668	0.00963391	0.0239988	1
GO_REGULATION_OF_SODIUM_ION_TRANSPORT	83	0.171354	1.8357	0.0142857	0.0241174	1
GO_LONG_TERM_MEMORY	32	0.274177	1.83481	0.0132325	0.0242194	1
GO_PLATELET_ACTIVATION	151	0.128119	1.83357	0.0119522	0.0243773	1
GO_POSITIVE_REGULATION_OF_DNA_TEMPLATED_TRANSCRIPTION_ELONGATION	26	0.292346	1.83329	0.0163934	0.0244023	1
GO_REGULATION_OF_SISTER_CHROMATID_COHESION	20	0.339564	1.83328	0.0114943	0.0243883	1
GO_REGULATION_OF_TELOMERE_CAPPING	26	0.29944	1.83296	0.0136452	0.0244167	1
GO_NEGATIVE_REGULATION_OF_TRANSMEMBRANE_TRANSPORT	107	0.149602	1.83283	0.0120482	0.0244182	1
GO_REGULATION_OF_SODIUM_ION_TRANSMEMBRANE_TRANSPORTER_ACTIVITY	51	0.214814	1.83275	0.00402414	0.0244177	1
GO_POSITIVE_REGULATION_OF_RELEASE_OF_SEQUESTERED_CALCIUM_ION_INTO_CYTOSOL	38	0.246962	1.83188	0.0119522	0.0245103	1
GO_SIGNAL_TRANSDUCTION_IN_ABSENCE_OF_LIGAND	67	0.192096	1.83064	0.008	0.0246594	1
GO_NEGATIVE_REGULATION_OF_CAMP_MEDIATED_SIGNALING	23	0.324417	1.829	0.0137255	0.0248705	1
GO_REGULATION_OF_CENTROSOME_DUPLICATION	40	0.249605	1.82811	0.018711	0.0249732	1
GO_GAMMA_AMINOBUTYRIC_ACID_TRANSPORT	15	0.392572	1.82748	0.0251451	0.0250325	1
GO_CELLULAR_METABOLIC_COMPOUND_SALVAGE	29	0.290737	1.82563	0.00996016	0.0252879	1
GO_NEUROMUSCULAR_PROCESS_CONTROLLING_BALANCE	50	0.216309	1.82561	0.0177866	0.0252743	1
GO_POSITIVE_REGULATION_OF_AMYLOID_BETA_FORMATION	16	0.381711	1.82546	0.0275049	0.0252841	1
GO_PORPHYRIN_CONTAINING_COMPOUND_METABOLIC_PROCESS	36	0.256396	1.82481	0.023301	0.0253461	1
GO_REGULATION_OF_CAMP_DEPENDENT_PROTEIN_KINASE_ACTIVITY	19	0.341699	1.8228	0.015873	0.0255897	1
GO_GLUCOSE_IMPORT	54	0.213999	1.8209	0.023301	0.0258262	1
GO_REGULATION_OF_TRANSCRIPTION_INITIATION_FROM_RNA_POLYMERASE_II_PROMOTER	26	0.301039	1.82044	0.0137795	0.0258662	1
GO_MODULATION_BY_HOST_OF_VIRAL_PROCESS	24	0.313073	1.82027	0.0105263	0.0258764	1
GO_POSITIVE_REGULATION_OF_VASCULAR_SMOOTH_MUSCLE_CELL_PROLIFERATION	40	0.245263	1.81826	0.0148936	0.0261498	1
GO_PROTEIN_HETEROTETRAMERIZATION	24	0.306679	1.8177	0.0167015	0.0262056	1
GO_NEGATIVE_REGULATION_OF_TRANSLATIONAL_INITIATION	18	0.352027	1.8173	0.0182186	0.0262515	1
GO_PIGMENT_GRANULE_LOCALIZATION	25	0.298024	1.81627	0.0134875	0.0264053	1
GO_REGULATION_OF_CARDIAC_MUSCLE_CONTRACTION_BY_CALCIUM_ION_SIGNALING	24	0.311301	1.81432	0.024	0.0266544	1
GO_POSITIVE_REGULATION_OF_EXCITATORY_POSTSYNAPTIC_POTENTIAL	28	0.283579	1.81254	0.00968992	0.0268775	1
GO_REGULATION_OF_GLUCOSE_TRANSMEMBRANE_TRANSPORT	64	0.192589	1.81152	0.00992064	0.0270121	1
GO_AMYLOID_FIBRIL_FORMATION	16	0.380791	1.81136	0.0204082	0.027026	1
GO_PROTEIN_CATABOLIC_PROCESS_IN_THE_VACUOLE	15	0.38888	1.81034	0.00821355	0.0271508	1
GO_SIGNAL_TRANSDUCTION_IN_RESPONSE_TO_DNA_DAMAGE	124	0.143827	1.8082	0.0172414	0.0274675	1
GO_REGULATION_OF_CALCIUM_ION_TRANSMEMBRANE_TRANSPORTER_ACTIVITY	83	0.17204	1.80794	0.00609756	0.0274839	1
GO_PIGMENT_GRANULE_ORGANIZATION	25	0.303141	1.80788	0.015534	0.0274816	1
GO_PROTEIN_LOCALIZATION_TO_CELL_SURFACE	60	0.198666	1.80649	0.00782779	0.0276546	1
GO_REGULATION_OF_CIRCADIAN_RHYTHM	111	0.14943	1.80252	0.0230608	0.0282519	1
GO_CELLULAR_RESPONSE_TO_MECHANICAL_STIMULUS	75	0.17926	1.80218	0.030303	0.0282872	1
GO_FEMALE_PREGNANCY	171	0.115899	1.80191	0.0142857	0.0283057	1
GO_CELLULAR_GLUCAN_METABOLIC_PROCESS	67	0.186219	1.79946	0.01875	0.0286652	1
GO_INTRINSIC_APOPTOTIC_SIGNALING_PATHWAY_IN_RESPONSE_TO_DNA_DAMAGE	95	0.157333	1.7991	0.0219124	0.0286976	1
GO_VASCULAR_ENDOTHELIAL_CELL_PROLIFERATION	31	0.273665	1.7961	0.0176817	0.0291462	1
GO_NUCLEOTIDE_TRANSPORT	22	0.3203	1.79599	0.0192719	0.0291447	1
GO_REGULATION_OF_PROTEIN_TARGETING_TO_MEMBRANE	35	0.258103	1.79451	0.0121457	0.0293802	1
GO_REGULATION_OF_CARBOHYDRATE_BIOSYNTHETIC_PROCESS	88	0.164297	1.79363	0.00809717	0.0295094	1
GO_AMINE_TRANSPORT	91	0.161152	1.79356	0.0163265	0.0295015	1
GO_DRUG_TRANSMEMBRANE_TRANSPORT	71	0.180231	1.79252	0.0107296	0.0296636	1
GO_FIBROBLAST_GROWTH_FACTOR_RECEPTOR_SIGNALING_PATHWAY	107	0.150348	1.79224	0.0175097	0.0296865	1
GO_PROTEIN_NEDDYLATION	15	0.384313	1.79176	0.0190275	0.0297536	1
GO_PIGMENTATION	94	0.156415	1.79168	0.0196464	0.0297492	1
GO_MYELOID_LEUKOCYTE_CYTOKINE_PRODUCTION	28	0.28553	1.79104	0.0177165	0.0298381	1
GO_POSITIVE_REGULATION_OF_RESPONSE_TO_CYTOKINE_STIMULUS	54	0.207027	1.79062	0.0115163	0.0298891	1
GO_SULFUR_COMPOUND_CATABOLIC_PROCESS	50	0.211074	1.78955	0.00980392	0.0300307	1
GO_NEGATIVE_REGULATION_OF_CHROMOSOME_SEGREGATION	42	0.230572	1.78673	0.0163599	0.0304455	1
GO_LIPID_DROPLET_ORGANIZATION	20	0.326509	1.78505	0.0185185	0.0307127	1
GO_REGULATION_OF_RECEPTOR_INTERNALIZATION	54	0.206364	1.785	0.0265306	0.0307094	1
GO_NEUROBLAST_PROLIFERATION	56	0.202412	1.78438	0.0155039	0.0307812	1
GO_POSITIVE_REGULATION_OF_DNA_BINDING_TRANSCRIPTION_FACTOR_ACTIVITY	250	0.0957559	1.78437	0.0184049	0.0307629	1
GO_RESPONSE_TO_INTERLEUKIN_7	27	0.283713	1.78153	0.0117188	0.0312332	1
GO_PEROXISOMAL_TRANSPORT	68	0.182661	1.77976	0.0197239	0.0314845	1
GO_POSITIVE_REGULATION_OF_HORMONE_SECRETION	122	0.135333	1.77848	0.0120724	0.0316865	1
GO_REGULATION_OF_TUMOR_NECROSIS_FACTOR_MEDIATED_SIGNALING_PATHWAY	51	0.213189	1.77745	0.0103306	0.031827	1
GO_POLYOL_BIOSYNTHETIC_PROCESS	71	0.178825	1.77637	0.0190275	0.0319811	1
GO_CELLULAR_POLYSACCHARIDE_CATABOLIC_PROCESS	23	0.308018	1.7763	0.012	0.0319753	1
GO_NEUTRAL_AMINO_ACID_TRANSPORT	36	0.253045	1.77488	0.012474	0.0321985	1
GO_ESTABLISHMENT_OR_MAINTENANCE_OF_CYTOSKELETON_POLARITY	18	0.347273	1.77457	0.0303644	0.0322309	1
GO_POSITIVE_REGULATION_OF_G1_S_TRANSITION_OF_MITOTIC_CELL_CYCLE	42	0.232137	1.77457	0.023622	0.032212	1
GO_CENTROMERE_COMPLEX_ASSEMBLY	37	0.247467	1.77441	0.0143443	0.0322167	1
GO_PREPULSE_INHIBITION	15	0.377426	1.77388	0.0235294	0.0322761	1
GO_SISTER_CHROMATID_COHESION	49	0.214016	1.77379	0.019305	0.0322728	1
GO_ESTABLISHMENT_OF_PROTEIN_LOCALIZATION_TO_MITOCHONDRIAL_MEMBRANE	15	0.379457	1.77265	0.0144928	0.0324296	1
GO_GPI_ANCHOR_METABOLIC_PROCESS	31	0.267126	1.77093	0.0253906	0.0327225	1
GO_REGULATION_OF_SPROUTING_ANGIOGENESIS	93	0.153398	1.77083	0.0227743	0.032724	1
GO_DEVELOPMENTAL_PIGMENTATION	44	0.22341	1.76955	0.0206379	0.032914	1
GO_POSITIVE_REGULATION_OF_PEPTIDE_SECRETION	259	0.0927122	1.76904	0.0234834	0.0329806	1
GO_ALPHA_AMINO_ACID_BIOSYNTHETIC_PROCESS	60	0.19513	1.76873	0.0265152	0.0330183	1
GO_HISTONE_METHYLATION	124	0.133647	1.7677	0.023622	0.033185	1
GO_REGULATION_OF_VIRAL_INDUCED_CYTOPLASMIC_PATTERN_RECOGNITION_RECEPTOR_SIGNALING_PATHWAY	18	0.346303	1.76716	0.016129	0.033266	1
GO_REGULATION_OF_NEURON_MIGRATION	40	0.23236	1.76709	0.022541	0.0332569	1
GO_PHOSPHATIDYLINOSITOL_3_KINASE_SIGNALING	142	0.127109	1.76532	0.0190275	0.0335466	1
GO_LONG_CHAIN_FATTY_ACYL_COA_METABOLIC_PROCESS	25	0.305741	1.76439	0.0206612	0.0336862	1
GO_GAMMA_AMINOBUTYRIC_ACID_SIGNALING_PATHWAY	25	0.295933	1.7642	0.0170455	0.0337003	1
GO_TELOMERE_CAPPING	37	0.246219	1.76356	0.0125261	0.033785	1
GO_REGULATION_OF_INTRACELLULAR_ESTROGEN_RECEPTOR_SIGNALING_PATHWAY	34	0.259094	1.75934	0.0295749	0.034516	1
GO_REGULATION_OF_JUN_KINASE_ACTIVITY	79	0.167219	1.75792	0.0186722	0.034737	1
GO_ORGANIC_ACID_TRANSPORT	306	0.0868701	1.75709	0.021611	0.0348659	1
GO_HISTONE_EXCHANGE	42	0.230866	1.75708	0.0122699	0.03485	1
GO_ACTIVATION_OF_PROTEIN_KINASE_B_ACTIVITY	30	0.265023	1.75481	0.023622	0.0352498	1
GO_CARBOHYDRATE_TRANSPORT	128	0.134751	1.75332	0.0157791	0.0355036	1
GO_MITOCHONDRION_DISTRIBUTION	16	0.366177	1.75285	0.0259481	0.0355768	1
GO_POSITIVE_REGULATION_OF_CELL_MIGRATION_INVOLVED_IN_SPROUTING_ANGIOGENESIS	28	0.276489	1.75265	0.0174081	0.0355964	1
GO_MUSCLE_ADAPTATION	111	0.142888	1.75187	0.0154143	0.035737	1
GO_GLYCOSPHINGOLIPID_BIOSYNTHETIC_PROCESS	25	0.293953	1.751	0.0250482	0.0358716	1
GO_REGULATION_OF_OSSIFICATION	187	0.109346	1.74904	0.0216535	0.0362139	1
GO_LONG_CHAIN_FATTY_ACYL_COA_BIOSYNTHETIC_PROCESS	19	0.337275	1.74883	0.0204499	0.0362402	1
GO_DEVELOPMENTAL_MATURATION	259	0.0934524	1.74865	0.0122699	0.036245	1
GO_POSITIVE_REGULATION_OF_LIPID_BIOSYNTHETIC_PROCESS	79	0.166496	1.74775	0.0194175	0.0363749	1
GO_MITOCHONDRIAL_GENOME_MAINTENANCE	21	0.31921	1.74733	0.0258964	0.036419	1
GO_CYTOPLASMIC_MRNA_PROCESSING_BODY_ASSEMBLY	20	0.330131	1.74694	0.021322	0.0364673	1
GO_POSITIVE_REGULATION_OF_ENDOTHELIAL_CELL_PROLIFERATION	99	0.145788	1.74693	0.018595	0.036448	1
GO_REGULATION_OF_CELL_GROWTH_INVOLVED_IN_CARDIAC_MUSCLE_CELL_DEVELOPMENT	19	0.318543	1.74668	0.0203252	0.0364782	1
GO_REGULATION_OF_GLYCOPROTEIN_METABOLIC_PROCESS	45	0.217574	1.74631	0.025641	0.0365305	1
GO_REGULATION_OF_LAMELLIPODIUM_ORGANIZATION	42	0.230201	1.74428	0.0185567	0.0368977	1
GO_MYD88_DEPENDENT_TOLL_LIKE_RECEPTOR_SIGNALING_PATHWAY	34	0.250525	1.74411	0.0218254	0.036907	1
GO_REGULATION_OF_PH	89	0.155081	1.74207	0.0239411	0.0372565	1
GO_POSITIVE_REGULATION_OF_MITOTIC_NUCLEAR_DIVISION	48	0.210531	1.74193	0.0167598	0.0372615	1
GO_REGULATION_OF_NUCLEAR_TRANSCRIBED_MRNA_CATABOLIC_PROCESS_DEADENYLATION_DEPENDENT_DECAY	18	0.345445	1.74105	0.0251572	0.0374166	1
GO_NEGATIVE_REGULATION_OF_TELOMERE_MAINTENANCE_VIA_TELOMERE_LENGTHENING	23	0.305011	1.7406	0.0217391	0.037482	1
GO_NUCLEOTIDE_SUGAR_BIOSYNTHETIC_PROCESS	22	0.313561	1.73725	0.0243902	0.038074	1
GO_NEGATIVE_REGULATION_OF_ANION_TRANSPORT	25	0.295763	1.73615	0.022	0.0382618	1
GO_POSITIVE_REGULATION_OF_PROTEIN_DEACETYLATION	19	0.329331	1.73537	0.0269231	0.0383966	1
GO_GLUCOSAMINE_CONTAINING_COMPOUND_METABOLIC_PROCESS	21	0.3215	1.73493	0.0314961	0.0384705	1
GO_POSITIVE_REGULATION_OF_CATION_CHANNEL_ACTIVITY	68	0.178318	1.73476	0.0258449	0.038479	1
GO_HISTONE_H3_DEACETYLATION	19	0.332807	1.73236	0.0333333	0.038934	1
GO_REGULATION_OF_CAMP_MEDIATED_SIGNALING	43	0.224777	1.73227	0.0221774	0.0389403	1
GO_POSITIVE_REGULATION_OF_PEPTIDYL_LYSINE_ACETYLATION	33	0.256471	1.73166	0.0305344	0.0390443	1
GO_GLYCOLIPID_CATABOLIC_PROCESS	15	0.360601	1.73026	0.0177866	0.0393053	1
GO_RESPONSE_TO_ANGIOTENSIN	24	0.300363	1.7291	0.0175439	0.0395255	1
GO_INOSITOL_PHOSPHATE_BIOSYNTHETIC_PROCESS	41	0.228752	1.72814	0.0221328	0.039716	1
GO_REGULATION_OF_MUSCLE_ADAPTATION	88	0.159082	1.72795	0.0325866	0.0397373	1
GO_REGULATION_OF_CILIUM_ASSEMBLY	50	0.206616	1.72622	0.0173745	0.0400682	1
GO_ANGIOGENESIS_INVOLVED_IN_WOUND_HEALING	22	0.312682	1.72519	0.0334029	0.040247	1
GO_MAGNESIUM_ION_TRANSPORT	17	0.341647	1.72316	0.0228216	0.0406512	1
GO_NEGATIVE_REGULATION_OF_ACTIN_FILAMENT_DEPOLYMERIZATION	37	0.2387	1.72144	0.0314342	0.0409997	1
GO_DEOXYRIBONUCLEOSIDE_TRIPHOSPHATE_METABOLIC_PROCESS	16	0.363288	1.71761	0.0162933	0.041808	1
GO_MAINTENANCE_OF_CELL_NUMBER	156	0.119698	1.71732	0.0255864	0.0418457	1
GO_POSITIVE_REGULATION_OF_CHROMOSOME_SEGREGATION	26	0.2745	1.71668	0.0211946	0.0419456	1
GO_REPRODUCTIVE_BEHAVIOR	31	0.259253	1.71579	0.0322581	0.0421193	1
GO_POSITIVE_REGULATION_OF_PROTEIN_IMPORT	39	0.232319	1.71556	0.02	0.0421484	1
GO_ERBB2_SIGNALING_PATHWAY	32	0.252442	1.71513	0.0238095	0.0422169	1
GO_REGULATION_OF_GLIAL_CELL_PROLIFERATION	32	0.250512	1.71499	0.031746	0.0422138	1
GO_HYDROGEN_PEROXIDE_CATABOLIC_PROCESS	22	0.306588	1.71487	0.0292969	0.0422201	1
GO_POSITIVE_REGULATION_OF_TUMOR_NECROSIS_FACTOR_SUPERFAMILY_CYTOKINE_PRODUCTION	83	0.159824	1.71445	0.0287474	0.0422834	1
GO_DNA_DAMAGE_RESPONSE_SIGNAL_TRANSDUCTION_BY_P53_CLASS_MEDIATOR	102	0.144478	1.71395	0.0301205	0.0423685	1
GO_REGULATION_OF_MYELOID_CELL_DIFFERENTIATION	210	0.101779	1.7137	0.0232108	0.0423981	1
GO_REGULATION_OF_MEMBRANE_DEPOLARIZATION	44	0.214721	1.71229	0.031746	0.0426938	1
GO_POSITIVE_REGULATION_OF_REACTIVE_OXYGEN_SPECIES_METABOLIC_PROCESS	90	0.157406	1.71091	0.0242086	0.0429898	1
GO_MONOCARBOXYLIC_ACID_CATABOLIC_PROCESS	121	0.135208	1.71044	0.016	0.0430661	1
GO_REGULATION_OF_POTASSIUM_ION_TRANSMEMBRANE_TRANSPORTER_ACTIVITY	55	0.190133	1.7102	0.0258449	0.0431005	1
GO_REGULATION_OF_DENDRITE_EXTENSION	22	0.291704	1.70948	0.0199203	0.0432293	1
GO_P38MAPK_CASCADE	47	0.209101	1.7094	0.0331263	0.0432208	1
GO_MATING_BEHAVIOR	24	0.294156	1.70934	0.0280561	0.043203	1
GO_MATING	37	0.234885	1.70877	0.0278884	0.0433165	1
GO_RIG_I_SIGNALING_PATHWAY	17	0.340707	1.70725	0.0277778	0.0436406	1
GO_NUCLEOTIDE_EXCISION_REPAIR_DNA_GAP_FILLING	23	0.296023	1.70593	0.022541	0.043906	1
GO_POSITIVE_REGULATION_OF_VASCULAR_ASSOCIATED_SMOOTH_MUSCLE_CELL_MIGRATION	18	0.334387	1.70566	0.0251938	0.0439447	1
GO_VASCULAR_PROCESS_IN_CIRCULATORY_SYSTEM	164	0.11463	1.70561	0.03125	0.0439317	1
GO_REGULATION_OF_LIPID_KINASE_ACTIVITY	64	0.179315	1.70415	0.0248447	0.0442076	1
GO_MONOCARBOXYLIC_ACID_BIOSYNTHETIC_PROCESS	205	0.101335	1.7039	0.0319361	0.0442327	1
GO_ENDOTHELIAL_CELL_CHEMOTAXIS	29	0.268277	1.70344	0.0344828	0.0443174	1
GO_POLYOL_CATABOLIC_PROCESS	24	0.291029	1.7034	0.0202429	0.0443	1
GO_N_ACETYLGLUCOSAMINE_METABOLIC_PROCESS	17	0.345574	1.70321	0.0301811	0.0443199	1
GO_CORPUS_CALLOSUM_DEVELOPMENT	15	0.364907	1.70201	0.0201207	0.0445799	1
GO_REGULATION_OF_VESICLE_FUSION	29	0.266455	1.7013	0.0348361	0.0447168	1
GO_POSITIVE_REGULATION_OF_PEPTIDYL_SERINE_PHOSPHORYLATION	92	0.152552	1.70104	0.0390144	0.0447631	1
GO_RESPONSE_TO_ELECTRICAL_STIMULUS	40	0.224136	1.69911	0.0246407	0.0451868	1
GO_NEURON_PROJECTION_EXTENSION_INVOLVED_IN_NEURON_PROJECTION_GUIDANCE	36	0.242388	1.69648	0.0229645	0.0457422	1
GO_INTERFERON_GAMMA_MEDIATED_SIGNALING_PATHWAY	63	0.184721	1.69569	0.0331263	0.0458872	1
GO_POSITIVE_REGULATION_OF_RECEPTOR_MEDIATED_ENDOCYTOSIS	48	0.211455	1.69502	0.0290698	0.0460285	1
GO_VERY_LONG_CHAIN_FATTY_ACID_METABOLIC_PROCESS	28	0.265324	1.69499	0.0316027	0.0460094	1
GO_NEGATIVE_REGULATION_OF_CALCINEURIN_MEDIATED_SIGNALING	15	0.361576	1.68988	0.0359408	0.0471623	1
GO_REGULATION_OF_PLATELET_DERIVED_GROWTH_FACTOR_RECEPTOR_SIGNALING_PATHWAY	24	0.285662	1.68868	0.0342742	0.0474075	1
GO_NEGATIVE_REGULATION_OF_PROTEIN_KINASE_B_SIGNALING	49	0.205517	1.68786	0.0253411	0.0475658	1
GO_REGULATION_OF_CHROMATIN_BINDING	21	0.302088	1.68733	0.0376238	0.0476401	1
GO_REGULATION_OF_BODY_FLUID_LEVELS	455	0.068315	1.68683	0.0318725	0.0477148	1
GO_NEGATIVE_REGULATION_OF_INTRACELLULAR_PROTEIN_TRANSPORT	39	0.224569	1.6867	0.0426829	0.0477228	1
GO_NEGATIVE_REGULATION_OF_REGULATED_SECRETORY_PATHWAY	22	0.302248	1.68596	0.0218688	0.0478573	1
GO_MONOVALENT_INORGANIC_CATION_HOMEOSTASIS	141	0.118876	1.68468	0.0278884	0.0481192	1
GO_NEGATIVE_REGULATION_OF_VIRAL_PROCESS	82	0.159538	1.6837	0.0321285	0.0483538	1
GO_TEMPERATURE_HOMEOSTASIS	166	0.113572	1.6837	0.0127389	0.0483278	1
GO_POSITIVE_REGULATION_OF_RUFFLE_ASSEMBLY	15	0.358092	1.68308	0.0289017	0.048472	1
GO_POSITIVE_REGULATION_OF_NITRIC_OXIDE_METABOLIC_PROCESS	40	0.227358	1.68135	0.0425963	0.0488683	1
GO_CELLULAR_RESPONSE_TO_FATTY_ACID	52	0.191417	1.67688	0.0292398	0.0499173	1
GO_REGULATION_OF_MEMBRANE_PROTEIN_ECTODOMAIN_PROTEOLYSIS	22	0.295445	1.67611	0.0220588	0.0500916	1
GO_POSITIVE_REGULATION_OF_LAMELLIPODIUM_ASSEMBLY	20	0.309146	1.67386	0.0301811	0.0506172	1
GO_CERAMIDE_CATABOLIC_PROCESS	18	0.329158	1.67307	0.0448343	0.0507784	1
GO_STRIATUM_DEVELOPMENT	17	0.32992	1.67084	0.0331384	0.0512982	1
GO_RECEPTOR_RECYCLING	32	0.242517	1.66971	0.0301811	0.0515687	1
GO_POSITIVE_REGULATION_OF_PROTEIN_LOCALIZATION_TO_CELL_SURFACE	16	0.344953	1.66944	0.0280899	0.0516089	1
GO_NEGATIVE_REGULATION_OF_MUSCLE_CELL_APOPTOTIC_PROCESS	44	0.210433	1.66616	0.0277186	0.0524171	1
GO_RESPONSE_TO_FLUID_SHEAR_STRESS	32	0.249982	1.66541	0.0494071	0.0526082	1
GO_POLYSACCHARIDE_CATABOLIC_PROCESS	24	0.282643	1.66417	0.0287356	0.0529041	1
GO_TETRAPYRROLE_METABOLIC_PROCESS	53	0.1946	1.66307	0.0355649	0.0531453	1
GO_ORGANIC_ACID_CATABOLIC_PROCESS	260	0.0894931	1.66247	0.0238569	0.0532636	1
GO_ACTIVATION_OF_CYSTEINE_TYPE_ENDOPEPTIDASE_ACTIVITY_INVOLVED_IN_APOPTOTIC_PROCESS	78	0.158	1.66217	0.0307377	0.053311	1
GO_POSITIVE_REGULATION_OF_JUN_KINASE_ACTIVITY	66	0.176193	1.66122	0.0342205	0.0535258	1
GO_ESTABLISHMENT_OF_EPITHELIAL_CELL_POLARITY	29	0.252121	1.65828	0.0441767	0.054265	1
GO_REGULATION_OF_GLUCOSE_METABOLIC_PROCESS	106	0.135993	1.6563	0.0243408	0.054753	1
GO_REGULATION_OF_CELL_DIVISION	155	0.112281	1.65548	0.0274841	0.054945	1
GO_CALCIUM_MEDIATED_SIGNALING	201	0.100453	1.65524	0.0383838	0.0549833	1
GO_RRNA_MODIFICATION	32	0.24705	1.65483	0.0257426	0.0550612	1
GO_INACTIVATION_OF_MAPK_ACTIVITY	27	0.269434	1.65462	0.0280374	0.0550896	1
GO_POSITIVE_REGULATION_OF_PROTEIN_TARGETING_TO_MEMBRANE	30	0.253276	1.65457	0.0445344	0.0550723	1
GO_NEGATIVE_REGULATION_OF_MULTI_ORGANISM_PROCESS	180	0.104702	1.65446	0.0246914	0.0550771	1
GO_RESPONSE_TO_AMPHETAMINE	32	0.247149	1.65346	0.0364807	0.0553562	1
GO_NEGATIVE_REGULATION_OF_NOTCH_SIGNALING_PATHWAY	39	0.225382	1.65324	0.0329897	0.0553908	1
GO_REGULATION_OF_GLUTAMATE_SECRETION	16	0.339213	1.65321	0.0448718	0.0553726	1
GO_PEPTIDYL_LYSINE_METHYLATION	110	0.13592	1.65256	0.037182	0.0555035	1
GO_AMYLOID_BETA_CLEARANCE	35	0.236624	1.65169	0.0239044	0.0557194	1
GO_CELLULAR_RESPONSE_TO_THYROID_HORMONE_STIMULUS	16	0.34638	1.65148	0.0418251	0.0557556	1
GO_CELLULAR_RESPONSE_TO_ARSENIC_CONTAINING_SUBSTANCE	19	0.30604	1.65039	0.0383065	0.0560371	1
GO_CARDIOCYTE_DIFFERENTIATION	145	0.116206	1.65004	0.0238569	0.0560888	1
GO_POSITIVE_REGULATION_OF_VASCULAR_ENDOTHELIAL_GROWTH_FACTOR_RECEPTOR_SIGNALING_PATHWAY	17	0.328521	1.64975	0.0366089	0.0561421	1
GO_ESTABLISHMENT_OR_MAINTENANCE_OF_BIPOLAR_CELL_POLARITY	47	0.200519	1.64649	0.0412574	0.056958	1
GO_NEGATIVE_REGULATION_OF_HISTONE_MODIFICATION	36	0.225426	1.64397	0.0364372	0.0576214	1
GO_MODULATION_BY_HOST_OF_VIRAL_GENOME_REPLICATION	15	0.355303	1.64374	0.0284553	0.057648	1
GO_POSITIVE_REGULATION_OF_PROTEIN_EXPORT_FROM_NUCLEUS	20	0.306706	1.64297	0.0382294	0.0578268	1
GO_INTRACELLULAR_STEROL_TRANSPORT	23	0.27979	1.64127	0.0296443	0.0582732	1
GO_ANTIBIOTIC_METABOLIC_PROCESS	95	0.146227	1.64126	0.0601202	0.0582431	1
GO_ARTERY_DEVELOPMENT	91	0.146169	1.64095	0.038835	0.0582926	1
GO_PHOSPHOLIPASE_C_ACTIVATING_G_PROTEIN_COUPLED_RECEPTOR_SIGNALING_PATHWAY	96	0.14236	1.64086	0.0409836	0.0582819	1
GO_PYRIMIDINE_CONTAINING_COMPOUND_METABOLIC_PROCESS	82	0.154042	1.6406	0.0245399	0.0583168	1
GO_VESICLE_FUSION_TO_PLASMA_MEMBRANE	22	0.287756	1.64027	0.0268041	0.0583592	1
GO_G0_TO_G1_TRANSITION	41	0.208574	1.63916	0.0310559	0.0586318	1
GO_NEUROTRANSMITTER_METABOLIC_PROCESS	141	0.118691	1.63842	0.0584677	0.0588186	1
GO_CELLULAR_RESPONSE_TO_OSMOTIC_STRESS	38	0.220127	1.63722	0.040568	0.0591255	1
GO_PLATELET_DEGRANULATION	122	0.125594	1.63689	0.0371901	0.0591968	1
GO_FATTY_ACID_TRANSMEMBRANE_TRANSPORT	18	0.317934	1.63481	0.0431373	0.0597534	1
GO_NEGATIVE_REGULATION_OF_NECROTIC_CELL_DEATH	15	0.352586	1.63441	0.041841	0.0598253	1
GO_CELLULAR_RESPONSE_TO_FLUID_SHEAR_STRESS	17	0.326811	1.63372	0.0574257	0.0599881	1
GO_RESPONSE_TO_AMYLOID_BETA	50	0.194738	1.63269	0.0365112	0.0602785	1
GO_POSITIVE_REGULATION_OF_GLUCOSE_TRANSMEMBRANE_TRANSPORT	35	0.230568	1.63184	0.0400802	0.06046	1
GO_POSITIVE_REGULATION_OF_LIPID_METABOLIC_PROCESS	138	0.119803	1.63064	0.042885	0.0607892	1
GO_REGULATION_OF_CELLULAR_RESPONSE_TO_GROWTH_FACTOR_STIMULUS	262	0.0871921	1.63028	0.0362173	0.0608482	1
GO_NEGATIVE_REGULATION_OF_NITRIC_OXIDE_METABOLIC_PROCESS	16	0.33796	1.63024	0.0417495	0.0608266	1
GO_REGULATION_OF_POLYSACCHARIDE_METABOLIC_PROCESS	39	0.217469	1.63012	0.036965	0.0608266	1
GO_CORONARY_VASCULATURE_DEVELOPMENT	47	0.201284	1.62958	0.0419287	0.0609492	1
GO_POSITIVE_REGULATION_OF_ATPASE_ACTIVITY	56	0.18139	1.62837	0.0351562	0.0612579	1
GO_REGULATION_OF_HYDROGEN_PEROXIDE_METABOLIC_PROCESS	18	0.325796	1.62837	0.0304878	0.061225	1
GO_HISTONE_MONOUBIQUITINATION	28	0.260304	1.62793	0.045977	0.0613176	1
GO_RESPONSE_TO_IRON_ION	30	0.243246	1.62506	0.0382294	0.0620773	1
GO_NEGATIVE_REGULATION_OF_ION_TRANSMEMBRANE_TRANSPORT	88	0.144782	1.62477	0.0191939	0.0621282	1
GO_CELLULAR_CARBOHYDRATE_BIOSYNTHETIC_PROCESS	75	0.159692	1.62464	0.0382409	0.0621352	1
GO_GLYCOPROTEIN_CATABOLIC_PROCESS	22	0.291386	1.62369	0.0385439	0.0623972	1
GO_PHAGOSOME_ACIDIFICATION	25	0.269642	1.62163	0.0403226	0.0629803	1
GO_VASCULAR_ASSOCIATED_SMOOTH_MUSCLE_CELL_MIGRATION	29	0.254248	1.6199	0.05	0.0634523	1
GO_REGULATION_OF_ERYTHROCYTE_DIFFERENTIATION	44	0.20708	1.61943	0.0360721	0.0635442	1
GO_POSITIVE_REGULATION_OF_LIPID_KINASE_ACTIVITY	36	0.229122	1.61795	0.0430528	0.0639645	1
GO_PEPTIDYL_ARGININE_METHYLATION	15	0.345067	1.6167	0.0456349	0.0642954	1
GO_MACROPHAGE_ACTIVATION	89	0.145663	1.61506	0.0421053	0.0647616	1
GO_CEREBRAL_CORTEX_NEURON_DIFFERENTIATION	21	0.294388	1.61367	0.0443548	0.0651407	1
GO_CIRCADIAN_REGULATION_OF_GENE_EXPRESSION	61	0.172357	1.61243	0.0532787	0.0655091	1
GO_REGULATION_OF_NIK_NF_KAPPAB_SIGNALING	102	0.136842	1.61242	0.0496183	0.0654788	1
GO_RESPONSE_TO_MUSCLE_STRETCH	18	0.313248	1.61203	0.036965	0.0655711	1
GO_POSITIVE_REGULATION_OF_NITRIC_OXIDE_SYNTHASE_ACTIVITY	19	0.309651	1.61161	0.0384615	0.0656664	1
GO_PIGMENT_METABOLIC_PROCESS	64	0.173464	1.61117	0.0404858	0.0657649	1
GO_NEURAL_TUBE_DEVELOPMENT	158	0.106359	1.61024	0.0380762	0.0660246	1
GO_ACETYL_COA_METABOLIC_PROCESS	38	0.225051	1.61002	0.0439331	0.0660633	1
GO_B_CELL_HOMEOSTASIS	27	0.26103	1.60414	0.0444444	0.0678498	1
GO_PROTEIN_LOCALIZATION_TO_CHROMATIN	23	0.282832	1.60354	0.0362903	0.0680047	1
GO_CELL_CHEMOTAXIS	258	0.0855148	1.6006	0.0480962	0.0688987	1
GO_PROTEIN_HYDROXYLATION	24	0.278726	1.60005	0.0317757	0.0690402	1
GO_REGULATION_OF_PROTEIN_GLYCOSYLATION	15	0.339652	1.60004	0.036	0.0690081	1
GO_PROTEIN_ADP_RIBOSYLATION	33	0.230656	1.59811	0.0421941	0.0695938	1
GO_MESENCHYMAL_CELL_DIFFERENTIATION	207	0.0959889	1.59733	0.0482897	0.0698379	1
GO_POSITIVE_REGULATION_OF_CELL_CYCLE_G1_S_PHASE_TRANSITION	50	0.194994	1.59694	0.0371057	0.0699232	1
GO_NUCLEOBASE_BIOSYNTHETIC_PROCESS	17	0.326224	1.59602	0.0433145	0.0702032	1
GO_REGULATION_OF_SENSORY_PERCEPTION	34	0.229017	1.59485	0.0524194	0.0705454	1
GO_INTRINSIC_APOPTOTIC_SIGNALING_PATHWAY_BY_P53_CLASS_MEDIATOR	68	0.165698	1.59445	0.03861	0.0706548	1
GO_INFLAMMATORY_CELL_APOPTOTIC_PROCESS	20	0.296188	1.59372	0.0539419	0.0708829	1
GO_POSITIVE_REGULATION_OF_MITOTIC_SISTER_CHROMATID_SEGREGATION	15	0.344237	1.59343	0.0365631	0.0709253	1
GO_REGULATION_OF_LAMELLIPODIUM_ASSEMBLY	30	0.244231	1.5932	0.0386179	0.0709591	1
GO_CARBOHYDRATE_DERIVATIVE_TRANSPORT	71	0.161315	1.59295	0.0486381	0.0710012	1
GO_MOTOR_NEURON_AXON_GUIDANCE	34	0.234348	1.59093	0.0502901	0.0716379	1
GO_CELLULAR_MODIFIED_AMINO_ACID_BIOSYNTHETIC_PROCESS	46	0.19518	1.59029	0.0340681	0.0718384	1
GO_DIOL_METABOLIC_PROCESS	21	0.289364	1.58882	0.0492126	0.072294	1
GO_KETONE_BIOSYNTHETIC_PROCESS	41	0.207731	1.5884	0.0318352	0.072394	1
GO_MORPHOGENESIS_OF_AN_EPITHELIAL_SHEET	55	0.18334	1.58826	0.0409836	0.0724049	1
GO_NEGATIVE_REGULATION_OF_METAPHASE_ANAPHASE_TRANSITION_OF_CELL_CYCLE	36	0.219971	1.58799	0.0489796	0.0724603	1
GO_REGULATION_OF_ENDOPLASMIC_RETICULUM_STRESS_INDUCED_INTRINSIC_APOPTOTIC_SIGNALING_PATHWAY	30	0.242935	1.5869	0.046875	0.0728001	1
GO_NEGATIVE_REGULATION_OF_SECRETION	205	0.096454	1.58627	0.040619	0.0729877	1
GO_MODIFICATION_OF_MORPHOLOGY_OR_PHYSIOLOGY_OF_OTHER_ORGANISM	127	0.121544	1.58626	0.0562249	0.0729532	1
GO_TELENCEPHALON_GLIAL_CELL_MIGRATION	21	0.286882	1.58534	0.056926	0.0732349	1
GO_SENSORY_PERCEPTION_OF_PAIN	99	0.135351	1.58528	0.0464646	0.0732151	1
GO_REGULATION_OF_ANDROGEN_RECEPTOR_SIGNALING_PATHWAY	26	0.264458	1.58484	0.0628571	0.0733204	1
GO_REGULATION_OF_CELL_AGING	48	0.19378	1.58482	0.0428016	0.073289	1
GO_VASCULAR_SMOOTH_MUSCLE_CONTRACTION	24	0.268545	1.58481	0.0480167	0.0732521	1
GO_CALCIUM_MEDIATED_SIGNALING_USING_INTRACELLULAR_CALCIUM_SOURCE	20	0.296594	1.5841	0.0534653	0.0734822	1
GO_CELLULAR_RESPONSE_TO_LOW_DENSITY_LIPOPROTEIN_PARTICLE_STIMULUS	20	0.292692	1.5839	0.055336	0.0735142	1
GO_NEGATIVE_REGULATION_OF_STRESS_ACTIVATED_PROTEIN_KINASE_SIGNALING_CASCADE	45	0.200786	1.58299	0.0492126	0.073784	1
GO_CELL_DEATH_IN_RESPONSE_TO_HYDROGEN_PEROXIDE	27	0.253023	1.58159	0.040856	0.0742373	1
GO_REGULATION_OF_STEROID_METABOLIC_PROCESS	112	0.127294	1.58007	0.0447471	0.0746958	1
GO_NEURON_PROJECTION_ARBORIZATION	21	0.290428	1.57936	0.0371094	0.0748851	1
GO_PHOSPHOLIPID_CATABOLIC_PROCESS	40	0.206488	1.57917	0.0502901	0.0749041	1
GO_MULTICELLULAR_ORGANISMAL_HOMEOSTASIS	438	0.0652593	1.57793	0.045098	0.0753109	1
GO_REGULATION_OF_VASCULAR_ENDOTHELIAL_GROWTH_FACTOR_RECEPTOR_SIGNALING_PATHWAY	32	0.231176	1.57771	0.0420842	0.0753357	1
GO_ACTIVATION_OF_JUN_KINASE_ACTIVITY	34	0.227297	1.57768	0.06	0.0753133	1
GO_REGULATION_OF_PEPTIDASE_ACTIVITY	378	0.0695991	1.577	0.040568	0.0755074	1
GO_RESPONSE_TO_COPPER_ION	28	0.245938	1.57573	0.0508806	0.0758701	1
GO_CELLULAR_RESPONSE_TO_ALCOHOL	79	0.150126	1.57559	0.0509804	0.0758653	1
GO_POSITIVE_REGULATION_OF_CELLULAR_RESPONSE_TO_TRANSFORMING_GROWTH_FACTOR_BETA_STIMULUS	29	0.24166	1.57328	0.0515873	0.0766313	1
GO_POSITIVE_REGULATION_OF_P38MAPK_CASCADE	26	0.250687	1.57323	0.0399202	0.076613	1
GO_ANIMAL_ORGAN_REGENERATION	70	0.162154	1.57189	0.0663984	0.077082	1
GO_STEM_CELL_DIVISION	41	0.204985	1.57113	0.0576923	0.0773128	1
GO_MULTI_ORGANISM_BEHAVIOR	64	0.164641	1.57106	0.0495049	0.0772986	1
GO_MICROVILLUS_ASSEMBLY	16	0.329041	1.57064	0.0524272	0.0774108	1
GO_NUCLEAR_TRANSCRIBED_MRNA_POLY_A_TAIL_SHORTENING	28	0.251579	1.57057	0.0502008	0.0774005	1
GO_POSITIVE_REGULATION_OF_TOLL_LIKE_RECEPTOR_SIGNALING_PATHWAY	23	0.274164	1.56866	0.0613108	0.078064	1
GO_POSITIVE_REGULATION_OF_ANION_TRANSPORT	46	0.195352	1.56649	0.0651731	0.0788439	1
GO_CELLULAR_RESPONSE_TO_GLUCAGON_STIMULUS	25	0.266933	1.56636	0.0512821	0.0788575	1
GO_REGULATION_OF_RESPIRATORY_GASEOUS_EXCHANGE	23	0.269915	1.56469	0.0551181	0.0793983	1
GO_POSITIVE_REGULATION_OF_SMALL_GTPASE_MEDIATED_SIGNAL_TRANSDUCTION	68	0.157718	1.56392	0.050813	0.0796444	1
GO_ESTABLISHMENT_OF_PIGMENT_GRANULE_LOCALIZATION	23	0.270142	1.55934	0.0491803	0.0812912	1
GO_PLACENTA_BLOOD_VESSEL_DEVELOPMENT	34	0.220585	1.55813	0.0366599	0.0816959	1
GO_RESPONSE_TO_INTERFERON_ALPHA	19	0.302428	1.55769	0.0547667	0.0818279	1
GO_GLYCOSYL_COMPOUND_CATABOLIC_PROCESS	29	0.239409	1.55717	0.0675676	0.0819925	1
GO_CARDIAC_CELL_DEVELOPMENT	83	0.144342	1.55671	0.0415162	0.0821299	1
GO_REGULATION_OF_OSTEOBLAST_DIFFERENTIATION	114	0.125323	1.55658	0.0378947	0.0821379	1
GO_RESPONSE_TO_FATTY_ACID	79	0.151227	1.5561	0.0606618	0.0822804	1
GO_NEGATIVE_REGULATION_OF_STRIATED_MUSCLE_CELL_APOPTOTIC_PROCESS	29	0.238254	1.55599	0.0582121	0.0822799	1
GO_POSITIVE_REGULATION_OF_PHOSPHOLIPID_METABOLIC_PROCESS	48	0.187452	1.55505	0.0489362	0.0825927	1
GO_RESPIRATORY_GASEOUS_EXCHANGE_BY_RESPIRATORY_SYSTEM	62	0.168328	1.55494	0.0705394	0.0825913	1
GO_NEGATIVE_REGULATION_OF_CALCIUM_ION_TRANSPORT_INTO_CYTOSOL	15	0.338117	1.55468	0.0557692	0.0826464	1
GO_CATECHOLAMINE_SECRETION	55	0.176241	1.55446	0.0606061	0.0826947	1
GO_MUSCLE_SYSTEM_PROCESS	432	0.0658331	1.55131	0.0500963	0.0839186	1
GO_POSITIVE_REGULATION_OF_TELOMERE_CAPPING	17	0.308375	1.55065	0.050813	0.0841334	1
GO_BRANCHED_CHAIN_AMINO_ACID_METABOLIC_PROCESS	21	0.287965	1.55037	0.0561555	0.0842124	1
GO_RESPONSE_TO_LEPTIN	22	0.273659	1.55006	0.0454545	0.0843059	1
GO_HOMOTYPIC_CELL_CELL_ADHESION	77	0.15063	1.54946	0.0510204	0.084505	1
GO_REGULATION_OF_TOLL_LIKE_RECEPTOR_SIGNALING_PATHWAY	65	0.159593	1.54715	0.0451866	0.0853448	1
GO_CELLULAR_RESPONSE_TO_BIOTIC_STIMULUS	212	0.092262	1.54624	0.0542798	0.0856494	1
GO_MEMBRANE_PROTEIN_INTRACELLULAR_DOMAIN_PROTEOLYSIS	18	0.307244	1.54464	0.0562016	0.0862401	1
GO_POSITIVE_REGULATION_OF_VASCULAR_ENDOTHELIAL_CELL_PROLIFERATION	20	0.288058	1.54271	0.0497132	0.0869996	1
GO_FOREBRAIN_NEURON_DEVELOPMENT	25	0.256697	1.5411	0.0603622	0.0876177	1
GO_POLYAMINE_METABOLIC_PROCESS	17	0.313857	1.54108	0.0591603	0.0875856	1
GO_REGULATION_OF_NEURAL_PRECURSOR_CELL_PROLIFERATION	80	0.145271	1.53995	0.0590717	0.0879852	1
GO_REGULATION_OF_PLASMA_MEMBRANE_ORGANIZATION	15	0.333875	1.53548	0.0498008	0.0896802	1
GO_ZINC_ION_TRANSMEMBRANE_TRANSPORT	22	0.27179	1.53419	0.0446247	0.0901765	1
GO_NERVE_DEVELOPMENT	75	0.150443	1.53379	0.0595238	0.0903012	1
GO_PIGMENT_BIOSYNTHETIC_PROCESS	53	0.182164	1.53319	0.0691824	0.0905141	1
GO_POSITIVE_REGULATION_OF_NEUROTRANSMITTER_TRANSPORT	39	0.20681	1.53114	0.0466531	0.0913055	1
GO_REGULATION_OF_TUBE_SIZE	135	0.113389	1.53061	0.0684647	0.091463	1
GO_REGULATION_OF_ACTION_POTENTIAL	50	0.182725	1.5294	0.0663984	0.0919235	1
GO_POSITIVE_REGULATION_OF_GLYCOPROTEIN_METABOLIC_PROCESS	22	0.279025	1.52922	0.0647059	0.0919507	1
GO_REGULATION_OF_MUSCLE_CELL_DIFFERENTIATION	150	0.108799	1.52725	0.0740741	0.092696	1
GO_REGULATION_OF_CALCINEURIN_MEDIATED_SIGNALING	32	0.230414	1.52655	0.06917	0.0929396	1
GO_RESPONSE_TO_PH	39	0.204961	1.52597	0.0746888	0.0931239	1
GO_2_OXOGLUTARATE_METABOLIC_PROCESS	16	0.31021	1.5242	0.0698113	0.0937966	1
GO_PEPTIDYL_L_CYSTEINE_S_PALMITOYLATION	21	0.281103	1.52369	0.0583658	0.093952	1
GO_TRANSMEMBRANE_RECEPTOR_PROTEIN_SERINE_THREONINE_KINASE_SIGNALING_PATHWAY	323	0.0734823	1.52338	0.0609244	0.0940295	1
GO_CHROMATIN_ORGANIZATION_INVOLVED_IN_REGULATION_OF_TRANSCRIPTION	74	0.152403	1.52182	0.0633663	0.0946504	1
GO_NEGATIVE_REGULATION_OF_LIPID_BIOSYNTHETIC_PROCESS	50	0.177631	1.5217	0.0607966	0.0946535	1
GO_MITOTIC_G2_M_TRANSITION_CHECKPOINT	25	0.253047	1.52116	0.0630975	0.0948397	1
GO_REGULATION_OF_EXTRINSIC_APOPTOTIC_SIGNALING_PATHWAY_IN_ABSENCE_OF_LIGAND	45	0.189705	1.51982	0.063745	0.0953443	1
GO_REGULATION_OF_ACTIN_CYTOSKELETON_REORGANIZATION	36	0.204563	1.51849	0.0761523	0.0958585	1
GO_POSITIVE_REGULATION_OF_CYTOKINE_PRODUCTION_INVOLVED_IN_IMMUNE_RESPONSE	49	0.182439	1.51674	0.0492126	0.09653	1
GO_NEGATIVE_REGULATION_OF_NUCLEAR_DIVISION	56	0.170993	1.5157	0.0541082	0.0969593	1
GO_NEUROTRANSMITTER_CATABOLIC_PROCESS	20	0.286029	1.51563	0.0721248	0.0969424	1
GO_POSITIVE_REGULATION_OF_CALCIUM_ION_TRANSPORT_INTO_CYTOSOL	52	0.180159	1.51548	0.0670498	0.0969661	1
GO_NEGATIVE_REGULATION_OF_CELLULAR_RESPONSE_TO_DRUG	21	0.279175	1.51451	0.0520833	0.0973311	1
GO_RESPONSE_TO_MORPHINE	31	0.230059	1.51414	0.0545073	0.0974389	1
GO_MEMBRANE_RAFT_ORGANIZATION	24	0.264967	1.51256	0.0740741	0.0980777	1
GO_NEGATIVE_REGULATION_OF_TELOMERE_MAINTENANCE_VIA_TELOMERASE	17	0.304929	1.51206	0.0741525	0.0982664	1
GO_PEPTIDYL_LYSINE_TRIMETHYLATION	35	0.214806	1.51194	0.0465116	0.0982722	1
GO_LONG_CHAIN_FATTY_ACID_METABOLIC_PROCESS	81	0.146758	1.51193	0.0719844	0.0982264	1
GO_POSITIVE_REGULATION_OF_FAT_CELL_DIFFERENTIATION	58	0.16426	1.51182	0.0703125	0.0982246	1
GO_EPITHELIAL_TO_MESENCHYMAL_TRANSITION	133	0.114195	1.51178	0.0742115	0.0981968	1
GO_RENAL_SYSTEM_PROCESS	108	0.121821	1.51083	0.0652174	0.0986022	1
GO_NEGATIVE_REGULATION_OF_TRANSCRIPTION_REGULATORY_REGION_DNA_BINDING	19	0.280581	1.51024	0.0749507	0.0987862	1
GO_INTRINSIC_APOPTOTIC_SIGNALING_PATHWAY_IN_RESPONSE_TO_ENDOPLASMIC_RETICULUM_STRESS	56	0.171227	1.50809	0.0518962	0.0996934	1
GO_REGULATION_OF_EPIDERMAL_GROWTH_FACTOR_ACTIVATED_RECEPTOR_ACTIVITY	26	0.245934	1.50735	0.0550098	0.0999808	1
GO_MULTI_ORGANISM_CELLULAR_PROCESS	44	0.192431	1.50578	0.0816733	0.100669	1
GO_REGULATION_OF_FATTY_ACID_OXIDATION	29	0.241625	1.50445	0.0744275	0.101222	1
GO_POSITIVE_REGULATION_OF_MUSCLE_HYPERTROPHY	34	0.223205	1.5041	0.0764588	0.101317	1
GO_REGULATION_OF_INOSITOL_PHOSPHATE_BIOSYNTHETIC_PROCESS	15	0.309739	1.50236	0.0760234	0.102004	1
GO_NEGATIVE_REGULATION_OF_ENDOTHELIAL_CELL_PROLIFERATION	51	0.179295	1.50222	0.0750507	0.102014	1
GO_NEGATIVE_REGULATION_OF_CELLULAR_RESPONSE_TO_TRANSFORMING_GROWTH_FACTOR_BETA_STIMULUS	72	0.15452	1.50221	0.066	0.101968	1
GO_RESPONSE_TO_ACTIVITY	64	0.160068	1.5018	0.0692464	0.102103	1
[truncated: 568 more rows]
