# Supplementary material for: A tumor suppressor role for EZH2 in diffuse midline glioma pathogenesis
Source: Acta Neuropathol Commun. 2022 Apr 8;10:47. doi: 10.1186/s40478-022-01336-5 (PMC8994223; doi:10.1186/s40478-022-01336-5)
Supplement: Supplementary file 8 — Additional file 8. Exon quantification of EZH2 and TP53 of RNAseq samples in the EZH2 LOF vs. EZH2 WT in the context of PDGFB and p53 loss. [file 40478_2022_1336_MOESM8_ESM.xlsx]

## Sheet: Exon_quant
			N_CRE-1_S24	N_CRE-2_S25	N_CRE-3_S26	NEL_CRE-13_S38	NEL_CRE-14_S39	NEL_CRE-15_S40	NEL_CRE-16_S41		Avg N_CRE	Avg NEL_CRE
Gene	mm10 chrom coordinates	exon	normalized	normalized	normalized	normalized	normalized	normalized	normalized
Ezh2	chr6:47594894-47595030	1	0	0	0	1.49144	0	1.26336	0		0	0.6887
Ezh2	chr6:47577661-47577667	2	3.18428	14.171	5.31815	0	1.06357	2.52672	2.23978		7.5578	1.45752
Ezh2	chr6:47577544-47577660	2	14.3293	28.342	21.2726	1.49144	3.1907	17.6871	19.0381		21.3146	10.3518
Ezh2	chr6:47576563-47576664	3	28.6586	60.2267	35.8975	2.98288	5.31783	18.9504	13.4387		41.5942	10.1725
Ezh2	chr6:47576536-47576562	3	1.59214	26.5706	9.30676	0	2.12713	5.05344	2.23978		12.4898	2.35509
Ezh2	chr6:47558178-47558294	4	17.5136	53.1412	31.9089	0	3.1907	18.9504	8.95913		34.1879	7.77506
Ezh2	chr6:47556030-47556150	5	20.6979	81.4831	55.8406	2.98288	3.1907	16.4237	11.1989		52.6738	8.44904
Ezh2	chr6:47554215-47554264	6	9.55285	67.3121	26.5907	1.49144	3.1907	11.3703	6.71934		34.4852	5.69293
Ezh2	chr6:47554124-47554214	6	17.5136	63.7694	30.5794	4.47432	6.38139	13.897	11.1989		37.2874	8.9879
Ezh2	chr6:47552386-47552488	7	19.1057	53.1412	34.568	1.49144	4.25426	22.7405	7.83924		35.6049	9.08136
Ezh2	chr6:47551762-47551895	8	19.1057	65.5408	39.8861	5.96576	3.1907	17.6871	8.95913		41.5109	8.95066
Ezh2	chr6:47551732-47551761	8	12.7371	42.5129	30.5794	4.47432	2.12713	3.79008	1.11989		28.6098	2.87786
Ezh2	chr6:47547345-47547436	9	33.435	77.9404	45.2043	8.94863	6.38139	11.3703	3.35967		52.1932	7.51499
Ezh2	chr6:47545884-47545916	10	17.5136	44.2843	26.5907	0	2.12713	7.58017	2.23978		29.4629	2.98677
Ezh2	chr6:47545836-47545883	10	15.9214	69.0835	26.5907	1.49144	2.12713	17.6871	6.71934		37.1986	7.00624
Ezh2	chr6:47545783-47545835	10	19.1057	72.6263	21.2726	2.98288	1.06357	16.4237	8.95913		37.6682	7.35732
Ezh2	chr6:47545676-47545782	10	41.3957	109.825	33.2384	2.98288	5.31783	8.84353	6.71934		61.4864	5.96589
Ezh2	chr6:47544440-47544609	11	46.1721	139.938	65.1473	8.94863	10.6357	15.1603	15.6785		83.7526	12.6058
Ezh2	chr6:47544006-47544040	12	14.3293	42.5129	45.2043	1.49144	3.1907	11.3703	10.079		34.0155	6.53285
Ezh2	chr6:47543946-47544005	12	23.8821	40.7416	37.227	0	3.1907	10.1069	8.95913		33.9502	5.56418
Ezh2	chr6:47542366-47542406	13	15.9214	51.3698	19.9431	0	4.25426	6.31681	5.59945		29.0781	4.04263
Ezh2	chr6:47541845-47541970	14	7.96071	56.6839	34.568	0	3.1907	12.6336	6.71934		33.0709	5.63591
Ezh2	chr6:47540843-47540855	15	6.36857	12.3996	9.30676	2.98288	2.12713	1.26336	4.47956		9.35831	2.71323
Ezh2	chr6:47540736-47540842	15	19.1057	44.2843	38.5566	5.96576	2.12713	11.3703	13.4387		33.9822	8.22546
Ezh2	chr6:47540710-47540735	15	6.36857	28.342	14.6249	2.98288	1.06357	11.3703	4.47956		16.4451	4.97406
Ezh2	chr6:47540677-47540709	15	7.96071	35.4274	23.9317	2.98288	1.06357	10.1069	7.83924		22.4399	5.49814
Ezh2	chr6:47533742-47533837	16	17.5136	56.6839	54.511	0	0	2.52672	0		42.9028	0.631681
Ezh2	chr6:47532902-47532983	17	20.6979	67.3121	46.5338	0	0	1.26336	0		44.8479	0.31584
Ezh2	chr6:47532010-47532065	18	23.8821	58.4553	33.2384	0	1.06357	6.31681	4.47956		38.5253	2.96498
Ezh2	chr6:47531985-47532009	18	11.145	47.827	22.6021	0	1.06357	5.05344	2.23978		27.1914	2.0892
Ezh2	chr6:47531741-47531825	19	14.3293	58.4553	33.2384	1.49144	3.1907	13.897	3.35967		35.341	5.48469
Ezh2	chr6:47530541-47530601	20	17.5136	28.342	30.5794	4.47432	1.06357	1.26336	2.23978		25.4783	2.26026
Ezh2	chr6:47530319-47530540	20	28.6586	86.7972	78.4427	7.4572	4.25426	17.6871	4.47956		64.6328	8.46952
Ezh2	chr6:47530139-47530318	20	3.18428	10.6282	1.32954	0	2.12713	1.26336	2.23978		5.04735	1.40757
Tp53	chr11:69580359-69580401	1	0	0	0	0	0	1.26336	0		0	0.31584
Tp53	chr11:69580402-69580404	1	0	0	0	0	0	1.26336	0		0	0.31584
Tp53	chr11:69580405-69580515	1	1.59214	17.7137	3.98861	1.49144	2.12713	11.3703	3.35967		7.76482	4.58712
Tp53	chr11:69586891-69586973	2	0	3.54274	1.32954	0	0	2.52672	1.11989		1.62409	0.911653
Tp53	chr11:69587257-69587278	3	1.59214	3.54274	1.32954	0	1.06357	0	0		2.15481	0.265891
Tp53	chr11:69587372-69587632	4	11.145	23.0278	17.284	1.49144	3.1907	6.31681	2.23978		17.1523	3.30968
Tp53	chr11:69588364-69588547	5	7.96071	12.3996	5.31815	0	1.06357	2.52672	2.23978		8.55949	1.45752
Tp53	chr11:69588626-69588694	6	6.36857	3.54274	1.32954	1.49144	0	3.79008	1.11989		3.74695	1.60035
Tp53	chr11:69588695-69588738	6	3.18428	7.08549	0	2.98288	1.06357	3.79008	0		3.42326	1.95913
Tp53	chr11:69589141-69589250	7	1.59214	7.08549	1.32954	4.47432	3.1907	5.05344	2.23978		3.33572	3.73956
Tp53	chr11:69589573-69589709	8	4.77643	14.171	9.30676	0	0	5.05344	1.11989		9.41805	1.54333
Tp53	chr11:69589789-69589821	9	3.18428	7.08549	1.32954	0	0	1.26336	1.11989		3.86644	0.595813
Tp53	chr11:69589822-69589862	9	1.59214	1.77137	0	0	0	3.79008	0		1.12117	0.947521
Tp53	chr11:69590656-69590762	10	3.18428	3.54274	1.32954	0	0	3.79008	1.11989		2.68552	1.22749
Tp53	chr11:69591350-69591872	11	52.5407	147.024	47.8633	7.4572	21.2713	51.7978	26.8774		82.476	26.8509
Tp53	chr11:69591873-69591873	11	1.59214	0	0	0	0	0	0		0.530714	0

## Sheet: gene_expression
	N_CRE-1_S24	N_CRE-2_S25	N_CRE-3_S26	NEL_CRE-13_S38	NEL_CRE-14_S39	NEL_CRE-15_S40	NEL_CRE-16_S41		Avg N_CRE	Avg NEL_CRE
Tp53 HTSeq count	200	277	206	32	67	252	152		227.667	125.75
Tp53 normalized expression	34.6956	56.0505	40.3493	43.5295	58.451	56.6318	46.5455		43.6985	51.2894
Ezh2 HTSeq count	237	607	533	39	83	276	191		459	147.25
Ezh2 normalized expression	137.048	243.019	286.749	169.765	173.265	197.853	222.255		222.272	190.784
